# Supplementary material
Source: MDPI journal article supplement (https://www.mdpi.com/2304-6740/6/3/66)

# checkCIF/PLATON report

Structure factors have been supplied for datablock(s) ata\_519c\_0m

THIS REPORT IS FOR GUIDANCE ONLY. IF USED AS PART OF A REVIEW PROCEDURE FOR PUBLICATION, IT SHOULD NOT REPLACE THE EXPERTISE OF AN EXPERIENCED CRYSTALLOGRAPHIC REFEREE.

No syntax errors found.      CIF dictionary      Interpreting this report

## Datablock: ata\_519c\_0m

---

Bond precision:    C-C = 0.0140 Å                      Wavelength=0.71073

Cell:                      a=18.9040(7)              b=18.9040(7)              c=12.3051(9)  
                            alpha=90                      beta=90                      gamma=90  
Temperature:              173 K

|                | Calculated                                    | Reported                                      |
|----------------|-----------------------------------------------|-----------------------------------------------|
| Volume         | 4397.4(5)                                     | 4397.4(7)                                     |
| Space group    | P 4/n                                         | P 4/n                                         |
| Hall group     | -P 4a                                         | -P 4a                                         |
| Moiety formula | C48 H52 Mn4 N4 O20 Tb, C16 H36 N, 5(C H2 Cl2) | C48 H52 Mn4 N4 O20 Tb, 5(C H2 Cl2), C16 H36 N |
| Sum formula    | C69 H98 Cl10 Mn4 N5 O20 Tb                    | C69 H98 Cl10 Mn4 N5 O20 Tb                    |
| Mr             | 2050.71                                       | 2050.70                                       |
| Dx,g cm-3      | 1.549                                         | 1.549                                         |
| Z              | 2                                             | 2                                             |
| Mu (mm-1)      | 1.722                                         | 1.722                                         |
| F000           | 2084.0                                        | 2084.0                                        |
| F000'          | 2090.02                                       |                                               |
| h,k,lmax       | 23,23,15                                      | 23,23,15                                      |
| Nref           | 4331                                          | 4332                                          |
| Tmin,Tmax      | 0.440,0.842                                   | 0.588,0.746                                   |
| Tmin'          | 0.406                                         |                                               |

Correction method= # Reported T Limits: Tmin=0.588 Tmax=0.746  
AbsCorr = MULTI-SCAN

Data completeness= 1.000                      Theta(max)= 25.994

R(reflections)= 0.0473( 3891)              wR2(reflections)= 0.1306( 4332)

S = 1.283                      Npar= 453

---

The following ALERTS were generated. Each ALERT has the format

**test-name\_ALERT\_alert-type\_alert-level.**

Click on the hyperlinks for more details of the test.

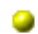

### Alert level C

|                   |                                                  |       |       |
|-------------------|--------------------------------------------------|-------|-------|
| PLAT088_ALERT_3_C | Poor Data / Parameter Ratio .....                | 9.56  | Note  |
| PLAT220_ALERT_2_C | Non-Solvent Resd 1 C Ueq(max)/Ueq(min) Range     | 5.1   | Ratio |
| PLAT222_ALERT_3_C | Non-Solv. Resd 1 H Uiso(max)/Uiso(min) Range     | 6.0   | Ratio |
| PLAT241_ALERT_2_C | High 'MainMol' Ueq as Compared to Neighbors of   | C14   | Check |
| PLAT244_ALERT_4_C | Low 'Solvent' Ueq as Compared to Neighbors of    | C17   | Check |
| PLAT342_ALERT_3_C | Low Bond Precision on C-C Bonds .....            | 0.014 | Ang.  |
| PLAT906_ALERT_3_C | Large K Value in the Analysis of Variance .....  | 2.407 | Check |
| PLAT934_ALERT_3_C | Number of (Iobs-Icalc)/SigmaW > 10 Outliers .... | 1     | Check |
| PLAT972_ALERT_2_C | Check Calcd Resid. Dens. 1.26A From C18          | -1.56 | eA-3  |
| PLAT977_ALERT_2_C | Check Negative Difference Density on H18B        | -0.46 | eA-3  |

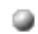

### Alert level G

|                   |                                                  |        |        |
|-------------------|--------------------------------------------------|--------|--------|
| PLAT002_ALERT_2_G | Number of Distance or Angle Restraints on AtSite | 17     | Note   |
| PLAT003_ALERT_2_G | Number of Uiso or Uij Restrained non-H Atoms ... | 26     | Report |
| PLAT042_ALERT_1_G | Calc. and Reported MoietyFormula Strings Differ  | Please | Check  |
| PLAT083_ALERT_2_G | SHELXL Second Parameter in WGHT Unusually Large  | 22.74  | Why ?  |
| PLAT152_ALERT_1_G | The Supplied and Calc. Volume s.u. Differ by ... | -2     | Units  |
| PLAT171_ALERT_4_G | The CIF-Embedded .res File Contains EADP Records | 2      | Report |
| PLAT172_ALERT_4_G | The CIF-Embedded .res File Contains DFIX Records | 2      | Report |
| PLAT176_ALERT_4_G | The CIF-Embedded .res File Contains SADI Records | 2      | Report |
| PLAT178_ALERT_4_G | The CIF-Embedded .res File Contains SIMU Records | 2      | Report |
| PLAT186_ALERT_4_G | The CIF-Embedded .res File Contains ISOR Records | 6      | Report |
| PLAT300_ALERT_4_G | Atom Site Occupancy of C15 Constrained at        | 0.6    | Check  |
| PLAT300_ALERT_4_G | Atom Site Occupancy of C16 Constrained at        | 0.6    | Check  |
| PLAT300_ALERT_4_G | Atom Site Occupancy of C15B Constrained at       | 0.4    | Check  |
| PLAT300_ALERT_4_G | Atom Site Occupancy of C16B Constrained at       | 0.4    | Check  |
| PLAT300_ALERT_4_G | Atom Site Occupancy of H14A Constrained at       | 0.6    | Check  |
| PLAT300_ALERT_4_G | Atom Site Occupancy of H14B Constrained at       | 0.6    | Check  |
| PLAT300_ALERT_4_G | Atom Site Occupancy of H15A Constrained at       | 0.6    | Check  |
| PLAT300_ALERT_4_G | Atom Site Occupancy of H15B Constrained at       | 0.6    | Check  |
| PLAT300_ALERT_4_G | Atom Site Occupancy of H16A Constrained at       | 0.6    | Check  |
| PLAT300_ALERT_4_G | Atom Site Occupancy of H16B Constrained at       | 0.6    | Check  |
| PLAT300_ALERT_4_G | Atom Site Occupancy of H16C Constrained at       | 0.6    | Check  |
| PLAT300_ALERT_4_G | Atom Site Occupancy of H14C Constrained at       | 0.4    | Check  |
| PLAT300_ALERT_4_G | Atom Site Occupancy of H14D Constrained at       | 0.4    | Check  |
| PLAT300_ALERT_4_G | Atom Site Occupancy of H15C Constrained at       | 0.4    | Check  |
| PLAT300_ALERT_4_G | Atom Site Occupancy of H15D Constrained at       | 0.4    | Check  |
| PLAT300_ALERT_4_G | Atom Site Occupancy of H16D Constrained at       | 0.4    | Check  |
| PLAT300_ALERT_4_G | Atom Site Occupancy of H16E Constrained at       | 0.4    | Check  |
| PLAT300_ALERT_4_G | Atom Site Occupancy of H16F Constrained at       | 0.4    | Check  |
| PLAT300_ALERT_4_G | Atom Site Occupancy of C13 Constrained at        | 0.25   | Check  |
| PLAT300_ALERT_4_G | Atom Site Occupancy of C14 Constrained at        | 0.25   | Check  |
| PLAT300_ALERT_4_G | Atom Site Occupancy of C18 Constrained at        | 0.25   | Check  |
| PLAT300_ALERT_4_G | Atom Site Occupancy of H18A Constrained at       | 0.25   | Check  |
| PLAT300_ALERT_4_G | Atom Site Occupancy of H18B Constrained at       | 0.25   | Check  |
| PLAT301_ALERT_3_G | Main Residue Disorder .....(Resd 1 )             | 99%    | Note   |
| PLAT302_ALERT_4_G | Anion/Solvent/Minor-Residue Disorder (Resd 2 )   | 47%    | Note   |
| PLAT302_ALERT_4_G | Anion/Solvent/Minor-Residue Disorder (Resd 4 )   | 100%   | Note   |
| PLAT304_ALERT_4_G | Non-Integer Number of Atoms in ..... Resd 4      | 1.25   | Check  |
| PLAT722_ALERT_1_G | Angle Calc 118.00, Rep 119.40 Dev...             | 1.40   | Degree |
|                   | C1B -C2B -H2B 1.555 1.555 1.555 # 140            |        | Check  |
| PLAT789_ALERT_4_G | Atoms with Negative _atom_site_disorder_group #  | 5      | Check  |
| PLAT811_ALERT_5_G | No ADDSYM Analysis: Too Many Excluded Atoms .... | !      | Info   |
| PLAT860_ALERT_3_G | Number of Least-Squares Restraints .....         | 196    | Note   |

---

0 **ALERT level A** = Most likely a serious problem - resolve or explain  
0 **ALERT level B** = A potentially serious problem, consider carefully  
10 **ALERT level C** = Check. Ensure it is not caused by an omission or oversight  
42 **ALERT level G** = General information/check it is not something unexpected

3 **ALERT type 1** CIF construction/syntax error, inconsistent or missing data  
8 **ALERT type 2** Indicator that the structure model may be wrong or deficient  
7 **ALERT type 3** Indicator that the structure quality may be low  
33 **ALERT type 4** Improvement, methodology, query or suggestion  
1 **ALERT type 5** Informative message, check

---

It is advisable to attempt to resolve as many as possible of the alerts in all categories. Often the minor alerts point to easily fixed oversights, errors and omissions in your CIF or refinement strategy, so attention to these fine details can be worthwhile. In order to resolve some of the more serious problems it may be necessary to carry out additional measurements or structure refinements. However, the purpose of your study may justify the reported deviations and the more serious of these should normally be commented upon in the discussion or experimental section of a paper or in the "special\_details" fields of the CIF. checkCIF was carefully designed to identify outliers and unusual parameters, but every test has its limitations and alerts that are not important in a particular case may appear. Conversely, the absence of alerts does not guarantee there are no aspects of the results needing attention. It is up to the individual to critically assess their own results and, if necessary, seek expert advice.

### Publication of your CIF in IUCr journals

A basic structural check has been run on your CIF. These basic checks will be run on all CIFs submitted for publication in IUCr journals (*Acta Crystallographica*, *Journal of Applied Crystallography*, *Journal of Synchrotron Radiation*); however, if you intend to submit to *Acta Crystallographica Section C* or *E* or *IUCrData*, you should make sure that full publication checks are run on the final version of your CIF prior to submission.

### Publication of your CIF in other journals

Please refer to the *Notes for Authors* of the relevant journal for any special instructions relating to CIF submission.

---

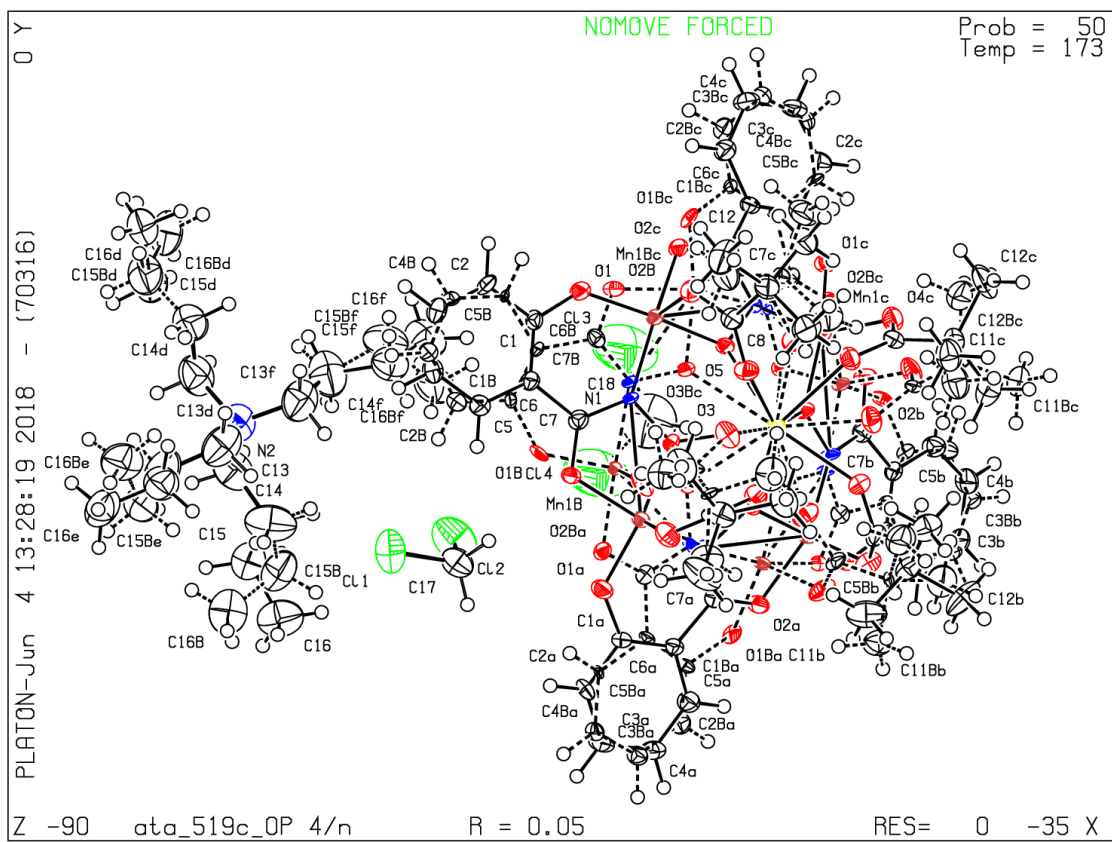

Supplement: s1 [file s1 › ATA-519C_checkcif.pdf]
