# Supplementary material
Source: MDPI journal article supplement (https://www.mdpi.com/2304-6740/6/3/66)
Supplement: s1 [file s1]

Archive with 7 entries (7 files):
- ATA-519C_checkcif.pdf
- ATA-520C_checkcif.pdf
- ATA-649C_checkcif.pdf
- ATA520C_0mfinalrev.cif
- ata649cfinal.cif
- ATA_519C_0mfinal.cif
- ELECTRONIC SUPPORTING INFORMATION.docx
