# Supplementary material
Source: MDPI journal article supplement (https://www.mdpi.com/2304-6740/6/3/66)
Supplement: s1 [file s1 › ATA520C_0mfinalrev.cif]

data_ata520c_0m
_audit_creation_date               2018-06-04
_audit_creation_method
;
Olex2 1.2
(compiled 2018.05.18 svn.r3508 for OlexSys, GUI svn.r5497)
;
# start Validation Reply Form
_vrf_PLAT220_ata520c_0m
;
PROBLEM: Large Hirshfeld Difference C39      --C40              0.39 Ang.  
RESPONSE: The metallacrowns can be arranged clockwise [M-NO-M] or anticlockwise 
[M-ON-M], with slightly different position for the transition metal ions, 
while the central lanthanide ions remains on its position in both isomers. 
The site occupation factor of the isomers were refined free to 0.82/0.18. 
Due to the large difference in site occupation factor a large Ueq(max)/Ueq(min) 
range can be observed. 
;
# end Validation Reply Form
_shelx_SHELXL_version_number       '2016/6'
_audit_contact_author_address      ?
_audit_contact_author_email        ?
_audit_contact_author_name         ''
_audit_contact_author_phone        ?
_publ_contact_author_id_orcid      ?
_publ_section_references
;
Dolomanov, O.V., Bourhis, L.J., Gildea, R.J, Howard, J.A.K. & Puschmann, H.
 (2009), J. Appl. Cryst. 42, 339-341.

Sheldrick, G.M. (2015). Acta Cryst. A71, 3-8.

Sheldrick, G.M. (2015). Acta Cryst. C71, 3-8.
;
_chemical_name_common              ?
_chemical_name_systematic          ?
_chemical_formula_moiety          
 'C48 H52 Gd Mn4 N4 O20, 5(C H2 Cl2), C16 H36 N'
_chemical_formula_sum              'C69 H98 Cl10 Gd Mn4 N5 O20'
_chemical_formula_weight           2049.03
_chemical_melting_point            ?
loop_
  _atom_type_symbol
  _atom_type_description
  _atom_type_scat_dispersion_real
  _atom_type_scat_dispersion_imag
  _atom_type_scat_source
 'C' 'C' 0.0033 0.0016 'International Tables Vol C Tables 4.2.6.8 and 6.1.1.4'
 'H' 'H' 0.0000 0.0000 'International Tables Vol C Tables 4.2.6.8 and 6.1.1.4'
 'Cl' 'Cl' 0.1484 0.1585 'International Tables Vol C Tables 4.2.6.8 and 6.1.1.4'
 'Gd' 'Gd' -0.1653 3.9035
 'International Tables Vol C Tables 4.2.6.8 and 6.1.1.4'
 'Mn' 'Mn' 0.3368 0.7283 'International Tables Vol C Tables 4.2.6.8 and 6.1.1.4'
 'N' 'N' 0.0061 0.0033 'International Tables Vol C Tables 4.2.6.8 and 6.1.1.4'
 'O' 'O' 0.0106 0.0060 'International Tables Vol C Tables 4.2.6.8 and 6.1.1.4'

_shelx_space_group_comment
;
The symmetry employed for this shelxl refinement is uniquely defined
by the following loop, which should always be used as a source of
symmetry information in preference to the above space-group names.
They are only intended as comments.
;
_space_group_crystal_system        'tetragonal'
_space_group_IT_number             85
_space_group_name_H-M_alt          'P 4/n'
_space_group_name_Hall             '-P 4a'
loop_
  _space_group_symop_operation_xyz
 'x, y, z'
 '-x+1/2, -y+1/2, z'
 '-y+1/2, x, z'
 'y, -x+1/2, z'
 '-x, -y, -z'
 'x-1/2, y-1/2, -z'
 'y-1/2, -x, -z'
 '-y, x-1/2, -z'

_cell_length_a                     18.9025(9)
_cell_length_b                     18.9025
_cell_length_c                     12.2959(6)
_cell_angle_alpha                  90
_cell_angle_beta                   90
_cell_angle_gamma                  90
_cell_volume                       4393.4(5)
_cell_formula_units_Z              2
_cell_measurement_reflns_used      33112
_cell_measurement_temperature      173(2)
_cell_measurement_theta_max        25.000
_cell_measurement_theta_min        1.524
_shelx_estimated_absorpt_T_max     0.921
_shelx_estimated_absorpt_T_min     0.488
_exptl_absorpt_coefficient_mu      1.674
_exptl_absorpt_correction_T_max    0.7457
_exptl_absorpt_correction_T_min    0.6009
_exptl_absorpt_correction_type     multi-scan
_exptl_absorpt_process_details    
 'SADABS-2016/2 (Bruker,2016/2) was used for absorption correction. wR2(int) was 0.0810 before and 0.0636 after correction. The Ratio of minimum to maximum transmission is 0.8058. The \l/2 correction factor is Not present.'
_exptl_absorpt_special_details     ?
_exptl_crystal_colour              brown
_exptl_crystal_colour_primary      brown
_exptl_crystal_density_diffrn      1.549
_exptl_crystal_density_meas        ?
_exptl_crystal_density_method      ?
_exptl_crystal_description         plate
_exptl_crystal_F_000               2082
_exptl_crystal_size_max            0.5
_exptl_crystal_size_mid            0.4
_exptl_crystal_size_min            0.05
_exptl_transmission_factor_max     ?
_exptl_transmission_factor_min     ?
_diffrn_reflns_av_R_equivalents    0.0680
_diffrn_reflns_av_unetI/netI       0.0337
_diffrn_reflns_Laue_measured_fraction_full  1.000
_diffrn_reflns_Laue_measured_fraction_max  1.000
_diffrn_reflns_limit_h_max         22
_diffrn_reflns_limit_h_min         -22
_diffrn_reflns_limit_k_max         22
_diffrn_reflns_limit_k_min         -22
_diffrn_reflns_limit_l_max         14
_diffrn_reflns_limit_l_min         -14
_diffrn_reflns_number              33112
_diffrn_reflns_point_group_measured_fraction_full  1.000
_diffrn_reflns_point_group_measured_fraction_max  1.000
_diffrn_reflns_theta_full          25.000
_diffrn_reflns_theta_max           25.000
_diffrn_reflns_theta_min           1.524
_diffrn_ambient_temperature        173(2)
_diffrn_detector                   'CCD plate'
_diffrn_detector_area_resol_mean   7.9
_diffrn_detector_type              'Bruker SMART APEX2 area detector'
_diffrn_measured_fraction_theta_full  1.000
_diffrn_measured_fraction_theta_max  1.000
_diffrn_measurement_device         '\k-geometry diffractometer'
_diffrn_measurement_device_type    'Bruker SMART APEX2'
_diffrn_measurement_method         '\k-geometry diffractometry'
_diffrn_radiation_monochromator    graphite
_diffrn_radiation_probe            x-ray
_diffrn_radiation_type             MoK\a
_diffrn_radiation_wavelength       0.71073
_diffrn_source                     'fine-focus sealed tube'
_reflns_Friedel_coverage           0.000
_reflns_Friedel_fraction_full      .
_reflns_Friedel_fraction_max       .
_reflns_number_gt                  3426
_reflns_number_total               3880
_reflns_special_details
;
 Reflections were merged by SHELXL according to the crystal
 class for the calculation of statistics and refinement.
 
 _reflns_Friedel_fraction is defined as the number of unique
 Friedel pairs measured divided by the number that would be
 possible theoretically, ignoring centric projections and
 systematic absences.
;
_reflns_threshold_expression       'I > 2\s(I)'
_computing_cell_refinement         ?
_computing_data_collection         ?
_computing_data_reduction          ?
_computing_molecular_graphics      'Olex2 (Dolomanov et al., 2009)'
_computing_publication_material    'Olex2 (Dolomanov et al., 2009)'
_computing_structure_refinement    'ShelXL (Sheldrick, 2015)'
_computing_structure_solution      'ShelXT (Sheldrick, 2015)'
_refine_diff_density_max           0.649
_refine_diff_density_min           -0.986
_refine_diff_density_rms           0.093
_refine_ls_extinction_coef         .
_refine_ls_extinction_method       none
_refine_ls_goodness_of_fit_ref     1.240
_refine_ls_hydrogen_treatment      constr
_refine_ls_matrix_type             full
_refine_ls_number_parameters       447
_refine_ls_number_reflns           3880
_refine_ls_number_restraints       175
_refine_ls_R_factor_all            0.0524
_refine_ls_R_factor_gt             0.0431
_refine_ls_restrained_S_all        1.220
_refine_ls_shift/su_max            0.000
_refine_ls_shift/su_mean           0.000
_refine_ls_structure_factor_coef   Fsqd
_refine_ls_weighting_details      
 'w=1/[\s^2^(Fo^2^)+(0.0215P)^2^+17.7666P] where P=(Fo^2^+2Fc^2^)/3'
_refine_ls_weighting_scheme        calc
_refine_ls_wR_factor_gt            0.1039
_refine_ls_wR_factor_ref           0.1077
_refine_special_details            ?
_olex2_refinement_description
;
1. Fixed Uiso
 At 1.2 times of:
  All C(H) groups, All C(H,H) groups, All C(H,H,H,H) groups
 At 1.5 times of:
  All C(H,H,H) groups
2. Restrained distances
 Cl3-C18 = Cl3-C18
 1.77 with sigma of 0.01
 Cl3-Cl4
 2.89 with sigma of 0.02
 C10-C11 \\sim C10-C12 \\sim C11-C12 \\sim C10A-C11A \\sim C10A-C12A \\sim
C11A-C12A
 with sigma of 0.02
 C13-C14 \\sim C14-C15 \\sim C15-C16 \\sim C14-C15A \\sim C15A-C16A
 with sigma of 0.02
 C9-C10 \\sim C9-C11 \\sim C9-C12 \\sim C9A-C10A \\sim C9A-C11A \\sim C9A-C12A
 with sigma of 0.01
3. Uiso/Uaniso restraints and constraints
Uanis(O3A) \\sim Ueq, Uanis(O1A) \\sim Ueq, Uanis(O2A) \\sim Ueq, Uanis(O4A)
\\sim Ueq: with sigma of 0.01 and sigma for terminal atoms of 0.02
Uanis(C8A) \\sim Ueq: with sigma of 0.01 and sigma for terminal atoms of 0.02
Uanis(C7A) \\sim Ueq, Uanis(C6A) \\sim Ueq, Uanis(C4A) \\sim Ueq, Uanis(C3A)
\\sim Ueq, Uanis(C4) \\sim Ueq, Uanis(C2A) \\sim Ueq, Uanis(C1A) \\sim Ueq,
Uanis(C2) \\sim Ueq, Uanis(C3) \\sim Ueq, Uanis(C1) \\sim Ueq, Uanis(C6) \\sim
Ueq, Uanis(C5) \\sim Ueq: with sigma of 0.01 and sigma for terminal atoms of
0.02
Uanis(C12A) \\sim Ueq, Uanis(C10A) \\sim Ueq, Uanis(C11A) \\sim Ueq: with sigma
of 0.01 and sigma for terminal atoms of 0.02
Uanis(C5A) \\sim Ueq: with sigma of 0.007 and sigma for terminal atoms of 0.01
Uanis(C18) \\sim Ueq: with sigma of 0.01 and sigma for terminal atoms of 0.02
Uanis(Cl3) = Uanis(Cl4)
Uanis(N1A) = Uanis(N1)
Uanis(C9) = Uanis(C9A)
4. Others
 Sof(O4A)=Sof(Mn1A)=Sof(O1A)=Sof(O2A)=Sof(O3A)=Sof(N1A)=Sof(C1A)=Sof(C2A)=
 Sof(H2A)=Sof(C3A)=Sof(H3A)=Sof(C4A)=Sof(H4A)=Sof(C5A)=Sof(H5A)=Sof(C6A)=
 Sof(C7A)=Sof(O5A)=Sof(C8A)=Sof(C9A)=Sof(C10A)=Sof(H10D)=Sof(H10E)=Sof(H10F)=
 Sof(C11A)=Sof(H11D)=Sof(H11E)=Sof(H11F)=Sof(C12A)=Sof(H12D)=Sof(H12E)=
 Sof(H12F)=1-FVAR(1)
 Sof(Mn1)=Sof(O1)=Sof(O2)=Sof(O3)=Sof(O4)=Sof(O5)=Sof(N1)=Sof(C1)=Sof(C2)=
 Sof(H2)=Sof(C3)=Sof(H3)=Sof(C4)=Sof(H4)=Sof(C5)=Sof(H5)=Sof(C6)=Sof(C7)=
 Sof(C8)=Sof(C9)=Sof(C10)=Sof(H10A)=Sof(H10B)=Sof(H10C)=Sof(C11)=Sof(H11A)=
 Sof(H11B)=Sof(H11C)=Sof(C12)=Sof(H12A)=Sof(H12B)=Sof(H12C)=FVAR(1)
 Fixed Sof: Cl3(0.25) Cl4(0.25) C18(0.25) H18A(0.25) H18B(0.25) H14A(0.6)
 H14B(0.6) H14C(0.4) H14D(0.4) C15(0.6) H15A(0.6) H15B(0.6) C16(0.6) H16A(0.6)
 H16B(0.6) H16C(0.6) C15A(0.4) H15C(0.4) H15D(0.4) C16A(0.4) H16D(0.4)
 H16E(0.4) H16F(0.4)
5.a Secondary CH2 refined with riding coordinates:
 C17(H17A,H17B), C18(H18A,H18B), C13(H13A,H13B), C14(H14A,H14B), C14(H14C,
 H14D), C15(H15A,H15B), C15A(H15C,H15D)
5.b Aromatic/amide H refined with riding coordinates:
 C2(H2), C3(H3), C4(H4), C5(H5), C2A(H2A), C3A(H3A), C4A(H4A), C5A(H5A)
5.c Idealised Me refined as rotating group:
 C10(H10A,H10B,H10C), C11(H11A,H11B,H11C), C12(H12A,H12B,H12C), C16(H16A,H16B,
 H16C), C16A(H16D,H16E,H16F), C10A(H10D,H10E,H10F), C11A(H11D,H11E,H11F),
 C12A(H12D,H12E,H12F)
;
_atom_sites_solution_hydrogens     geom
_atom_sites_solution_primary       dual
_atom_sites_solution_secondary     ?
loop_
  _atom_site_label
  _atom_site_type_symbol
  _atom_site_fract_x
  _atom_site_fract_y
  _atom_site_fract_z
  _atom_site_U_iso_or_equiv
  _atom_site_adp_type
  _atom_site_occupancy
  _atom_site_site_symmetry_order
  _atom_site_calc_flag
  _atom_site_refinement_flags_posn
  _atom_site_refinement_flags_adp
  _atom_site_refinement_flags_occupancy
  _atom_site_disorder_assembly
  _atom_site_disorder_group
 Gd1 Gd 0.250000 0.250000 0.64904(4) 0.02025(15) Uani 1 4 d S T P . .
 Mn1 Mn 0.36303(4) 0.38187(4) 0.50242(8) 0.0204(3) Uani 0.821(2) 1 d . . . A 1
 O1 O 0.4476(2) 0.4130(2) 0.4461(4) 0.0284(10) Uani 0.821(2) 1 d . . . A 1
 O2 O 0.4653(2) 0.1897(2) 0.4598(4) 0.0256(10) Uani 0.821(2) 1 d . . . A 1
 O3 O 0.34727(19) 0.23048(19) 0.5232(3) 0.0198(9) Uani 0.821(2) 1 d . . . A 1
 O4 O 0.3341(2) 0.3188(2) 0.7388(4) 0.0271(10) Uani 0.821(2) 1 d . . . A 1
 O5 O 0.3805(2) 0.4144(2) 0.6625(4) 0.0305(10) Uani 0.821(2) 1 d . . . A 1
 N1 N 0.3976(5) 0.2837(3) 0.4998(8) 0.0173(14) Uani 0.821(2) 1 d . . . A 1
 C1 C 0.5092(4) 0.3781(6) 0.4321(6) 0.0207(16) Uani 0.821(2) 1 d . U . A 1
 C2 C 0.5694(5) 0.4197(5) 0.4092(8) 0.027(3) Uani 0.821(2) 1 d . U . A 1
 H2 H 0.565208 0.469694 0.405658 0.033 Uiso 0.821(2) 1 calc R . . A 1
 C3 C 0.6339(6) 0.3885(7) 0.3921(10) 0.030(3) Uani 0.821(2) 1 d . U . A 1
 H3 H 0.673721 0.417079 0.374818 0.036 Uiso 0.821(2) 1 calc R . . A 1
 C4 C 0.6418(6) 0.3152(6) 0.3998(10) 0.034(3) Uani 0.821(2) 1 d . U . A 1
 H4 H 0.686913 0.293995 0.390529 0.041 Uiso 0.821(2) 1 calc R . . A 1
 C5 C 0.5830(6) 0.2741(5) 0.4211(8) 0.028(2) Uani 0.821(2) 1 d . U . A 1
 H5 H 0.587798 0.224079 0.424185 0.034 Uiso 0.821(2) 1 calc R . . A 1
 C6 C 0.5172(4) 0.3044(6) 0.4381(6) 0.0207(17) Uani 0.821(2) 1 d . U . A 1
 C7 C 0.4580(3) 0.2570(3) 0.4663(5) 0.0206(12) Uani 0.821(2) 1 d . . . A 1
 C8 C 0.3572(3) 0.3809(3) 0.7422(6) 0.0282(14) Uani 0.821(2) 1 d . . . A 1
 C9 C 0.3554(3) 0.4206(3) 0.8515(6) 0.0348(17) Uani 0.821(2) 1 d D . . A 1
 C10 C 0.3392(5) 0.3706(4) 0.9458(7) 0.046(2) Uani 0.821(2) 1 d D . . A 1
 H10A H 0.293272 0.347858 0.933694 0.069 Uiso 0.821(2) 1 calc GR . . A 1
 H10B H 0.337815 0.397418 1.013980 0.069 Uiso 0.821(2) 1 calc GR . . A 1
 H10C H 0.376131 0.334272 0.950367 0.069 Uiso 0.821(2) 1 calc GR . . A 1
 C11 C 0.2980(4) 0.4767(5) 0.8429(8) 0.060(3) Uani 0.821(2) 1 d D . . A 1
 H11A H 0.309370 0.509213 0.783412 0.090 Uiso 0.821(2) 1 calc GR . . A 1
 H11B H 0.295244 0.503056 0.911389 0.090 Uiso 0.821(2) 1 calc GR . . A 1
 H11C H 0.252443 0.453815 0.828444 0.090 Uiso 0.821(2) 1 calc GR . . A 1
 C12 C 0.4273(4) 0.4565(5) 0.8704(7) 0.056(3) Uani 0.821(2) 1 d D . . A 1
 H12A H 0.464820 0.420770 0.869117 0.084 Uiso 0.821(2) 1 calc GR . . A 1
 H12B H 0.427060 0.480301 0.941191 0.084 Uiso 0.821(2) 1 calc GR . . A 1
 H12C H 0.435771 0.491371 0.812853 0.084 Uiso 0.821(2) 1 calc GR . . A 1
 O4A O 0.3575(10) 0.2411(10) 0.7260(16) 0.030(5) Uani 0.179(2) 1 d . U . A 2
 Cl1 Cl 0.65338(10) 0.09665(13) 0.28809(17) 0.0760(6) Uani 1 1 d . . . . .
 Cl2 Cl 0.51534(13) 0.11155(14) 0.1898(2) 0.0915(7) Uani 1 1 d . . . . .
 C17 C 0.5619(3) 0.0831(4) 0.3034(6) 0.0517(17) Uani 1 1 d . . . . .
 H17A H 0.552649 0.032077 0.315205 0.062 Uiso 1 1 calc R . . . .
 H17B H 0.544970 0.109070 0.368273 0.062 Uiso 1 1 calc R . . . .
 Cl3 Cl 0.3098(8) 0.329(2) 0.2431(19) 0.213(7) Uani 0.25 1 d D . . B -1
 Cl4 Cl 0.1582(12) 0.2950(19) 0.2489(19) 0.213(7) Uani 0.25 1 d D . . B -1
 C18 C 0.265(4) 0.248(3) 0.260(3) 0.14(2) Uani 0.25 1 d D U . B -1
 H18A H 0.274178 0.225987 0.331954 0.171 Uiso 0.25 1 calc R . . B -1
 H18B H 0.274806 0.213921 0.201156 0.171 Uiso 0.25 1 calc R . . B -1
 N2 N 0.750000 0.250000 0.000000 0.071(4) Uani 1 4 d S T P . .
 C13 C 0.6932(5) 0.2775(5) 0.0762(7) 0.081(3) Uani 1 1 d D . . . .
 H13A H 0.676972 0.237716 0.122288 0.097 Uiso 1 1 calc R . . . .
 H13B H 0.714871 0.313122 0.124827 0.097 Uiso 1 1 calc R . . . .
 C14 C 0.6294(4) 0.3103(6) 0.0230(8) 0.094(3) Uani 1 1 d D . . . .
 H14A H 0.606768 0.277534 -0.029300 0.113 Uiso 0.6 1 calc R . . C 1
 H14B H 0.641368 0.355163 -0.014172 0.113 Uiso 0.6 1 calc R . . C 1
 H14C H 0.605461 0.271567 -0.016803 0.113 Uiso 0.4 1 calc R . . D 2
 H14D H 0.647940 0.343071 -0.032940 0.113 Uiso 0.4 1 calc R . . D 2
 C15 C 0.5826(7) 0.3228(9) 0.1244(11) 0.066(4) Uani 0.6 1 d D . . E 1
 H15A H 0.575251 0.277752 0.163977 0.079 Uiso 0.6 1 calc R . . E 1
 H15B H 0.605769 0.356788 0.174239 0.079 Uiso 0.6 1 calc R . . E 1
 C16 C 0.5125(8) 0.3520(9) 0.0861(15) 0.091(5) Uani 0.6 1 d D . . E 1
 H16A H 0.495471 0.324073 0.024180 0.136 Uiso 0.6 1 calc GR . . E 1
 H16B H 0.518481 0.401375 0.063758 0.136 Uiso 0.6 1 calc GR . . E 1
 H16C H 0.477942 0.349388 0.145419 0.136 Uiso 0.6 1 calc GR . . E 1
 C15A C 0.5710(10) 0.3507(10) 0.083(2) 0.070(7) Uani 0.4 1 d D . . E 2
 H15C H 0.591725 0.380732 0.140896 0.084 Uiso 0.4 1 calc R . . E 2
 H15D H 0.544830 0.381516 0.031873 0.084 Uiso 0.4 1 calc R . . E 2
 C16A C 0.5219(13) 0.2965(12) 0.1321(17) 0.079(6) Uani 0.4 1 d D . . E 2
 H16D H 0.498218 0.270195 0.073849 0.118 Uiso 0.4 1 calc GR . . E 2
 H16E H 0.486335 0.320410 0.177031 0.118 Uiso 0.4 1 calc GR . . E 2
 H16F H 0.549145 0.263642 0.177331 0.118 Uiso 0.4 1 calc GR . . E 2
 Mn1A Mn 0.4156(2) 0.19831(18) 0.4905(3) 0.0166(12) Uani 0.179(2) 1 d . . . A 2
 O1A O 0.5020(10) 0.2172(10) 0.4340(16) 0.022(4) Uani 0.179(2) 1 d . U . A 2
 O2A O 0.4019(11) 0.4163(9) 0.4511(15) 0.017(4) Uani 0.179(2) 1 d . U . A 2
 O3A O 0.3189(8) 0.1797(9) 0.5107(15) 0.018(4) Uani 0.179(2) 1 d . U . A 2
 N1A N 0.392(3) 0.303(2) 0.489(4) 0.0173(14) Uani 0.179(2) 1 d . . . A 2
 C1A C 0.537(2) 0.2802(18) 0.426(3) 0.010(7) Uani 0.179(2) 1 d . U . A 2
 C2A C 0.609(3) 0.277(3) 0.408(4) 0.025(11) Uani 0.179(2) 1 d . U . A 2
 H2A H 0.631825 0.232548 0.406327 0.030 Uiso 0.179(2) 1 calc R . . A 2
 C3A C 0.649(3) 0.338(2) 0.394(4) 0.012(9) Uani 0.179(2) 1 d . U . A 2
 H3A H 0.696971 0.333262 0.373535 0.014 Uiso 0.179(2) 1 calc R . . A 2
 C4A C 0.621(3) 0.403(3) 0.407(4) 0.019(12) Uani 0.179(2) 1 d . U . A 2
 H4A H 0.649359 0.444670 0.405897 0.022 Uiso 0.179(2) 1 calc R . . A 2
 C5A C 0.549(2) 0.407(2) 0.422(3) 0.008(9) Uani 0.179(2) 1 d . U . A 2
 H5A H 0.527243 0.452062 0.422734 0.010 Uiso 0.179(2) 1 calc R . . A 2
 C6A C 0.5055(16) 0.344(3) 0.437(2) 0.009(7) Uani 0.179(2) 1 d . U . A 2
 C7A C 0.4293(14) 0.3581(15) 0.460(2) 0.024(6) Uani 0.179(2) 1 d . U . A 2
 O5A O 0.3190(10) 0.4473(10) 0.6509(17) 0.032(5) Uani 0.179(2) 1 d . . . A 2
 C8A C 0.2995(14) 0.4116(13) 0.739(2) 0.023(6) Uani 0.179(2) 1 d . U . A 2
 C9A C 0.3299(16) 0.4350(14) 0.846(2) 0.0348(17) Uani 0.179(2) 1 d D . . A 2
 C10A C 0.306(2) 0.3862(17) 0.937(3) 0.047(11) Uani 0.179(2) 1 d D U . A 2
 H10D H 0.260314 0.364887 0.918555 0.070 Uiso 0.179(2) 1 calc GR . . A 2
 H10E H 0.301059 0.413521 1.004732 0.070 Uiso 0.179(2) 1 calc GR . . A 2
 H10F H 0.341184 0.348741 0.948011 0.070 Uiso 0.179(2) 1 calc GR . . A 2
 C11A C 0.3049(18) 0.5105(15) 0.867(3) 0.047(10) Uani 0.179(2) 1 d D U . A 2
 H11D H 0.313684 0.522844 0.943016 0.071 Uiso 0.179(2) 1 calc GR . . A 2
 H11E H 0.254081 0.513948 0.851600 0.071 Uiso 0.179(2) 1 calc GR . . A 2
 H11F H 0.330738 0.543157 0.819416 0.071 Uiso 0.179(2) 1 calc GR . . A 2
 C12A C 0.4103(17) 0.434(2) 0.836(3) 0.054(12) Uani 0.179(2) 1 d D U . A 2
 H12D H 0.429964 0.401566 0.890706 0.081 Uiso 0.179(2) 1 calc GR . . A 2
 H12E H 0.429039 0.481441 0.847580 0.081 Uiso 0.179(2) 1 calc GR . . A 2
 H12F H 0.423684 0.417224 0.763164 0.081 Uiso 0.179(2) 1 calc GR . . A 2

loop_
  _atom_site_aniso_label
  _atom_site_aniso_U_11
  _atom_site_aniso_U_22
  _atom_site_aniso_U_33
  _atom_site_aniso_U_23
  _atom_site_aniso_U_13
  _atom_site_aniso_U_12
 Gd1 0.01628(17) 0.01628(17) 0.0282(3) 0.000 0.000 0.000
 Mn1 0.0149(5) 0.0147(4) 0.0317(6) 0.0012(4) 0.0033(4) -0.0003(3)
 O1 0.017(2) 0.018(2) 0.050(3) 0.0043(19) 0.010(2) -0.0010(19)
 O2 0.016(2) 0.016(2) 0.044(3) -0.0033(19) 0.007(2) -0.0003(19)
 O3 0.0151(18) 0.0127(18) 0.032(2) 0.0003(16) 0.0057(16) -0.0030(15)
 O4 0.026(2) 0.023(2) 0.032(3) -0.0030(18) -0.0059(18) -0.0017(17)
 O5 0.035(2) 0.029(2) 0.027(2) -0.005(2) 0.003(2) -0.0089(19)
 N1 0.011(3) 0.011(4) 0.030(3) 0.000(3) 0.003(2) -0.003(3)
 C1 0.017(4) 0.022(4) 0.023(3) 0.000(3) -0.001(2) 0.000(4)
 C2 0.026(5) 0.024(4) 0.032(4) 0.005(3) 0.003(4) -0.010(4)
 C3 0.020(5) 0.033(7) 0.036(5) -0.003(4) 0.004(4) -0.008(4)
 C4 0.017(4) 0.033(6) 0.051(5) 0.007(5) 0.005(3) 0.003(5)
 C5 0.028(6) 0.024(4) 0.033(4) 0.001(3) -0.001(4) 0.001(5)
 C6 0.015(4) 0.019(4) 0.028(4) -0.001(3) 0.001(3) 0.001(3)
 C7 0.021(3) 0.021(3) 0.020(3) 0.003(2) -0.002(2) -0.001(2)
 C8 0.020(3) 0.028(3) 0.037(4) -0.003(3) -0.008(3) -0.002(3)
 C9 0.041(5) 0.030(4) 0.033(3) -0.012(3) 0.009(4) -0.011(3)
 C10 0.059(6) 0.044(5) 0.036(5) -0.005(4) 0.006(5) -0.006(5)
 C11 0.081(7) 0.038(5) 0.061(6) -0.010(5) 0.030(5) 0.005(5)
 C12 0.063(6) 0.057(5) 0.047(6) -0.024(5) 0.004(4) -0.028(5)
 O4A 0.026(8) 0.034(8) 0.031(8) -0.004(7) -0.011(7) 0.006(7)
 Cl1 0.0583(11) 0.1085(17) 0.0613(13) 0.0043(12) 0.0093(10) 0.0099(11)
 Cl2 0.0948(16) 0.1046(17) 0.0751(15) -0.0003(13) -0.0265(13) 0.0348(14)
 C17 0.057(4) 0.052(4) 0.046(4) -0.011(3) -0.004(3) 0.010(3)
 Cl3 0.123(11) 0.44(3) 0.078(5) 0.087(9) -0.004(6) -0.034(17)
 Cl4 0.123(11) 0.44(3) 0.078(5) 0.087(9) -0.004(6) -0.034(17)
 C18 0.14(3) 0.14(3) 0.14(2) 0.000(11) -0.003(10) 0.000(11)
 N2 0.083(6) 0.083(6) 0.047(8) 0.000 0.000 0.000
 C13 0.091(6) 0.096(7) 0.057(5) -0.013(5) 0.011(5) -0.019(5)
 C14 0.073(6) 0.118(8) 0.092(7) -0.045(6) -0.002(5) -0.007(6)
 C15 0.086(11) 0.055(9) 0.058(10) -0.002(7) -0.008(8) 0.005(9)
 C16 0.066(10) 0.086(12) 0.120(15) -0.042(11) -0.020(10) 0.000(9)
 C15A 0.09(2) 0.044(13) 0.078(18) 0.003(11) -0.030(14) -0.004(12)
 C16A 0.091(18) 0.085(16) 0.060(14) -0.018(12) -0.014(12) 0.009(15)
 Mn1A 0.011(2) 0.010(2) 0.029(2) -0.0030(16) 0.0022(17) -0.0019(15)
 O1A 0.019(7) 0.016(7) 0.031(8) -0.005(7) 0.007(7) 0.010(7)
 O2A 0.013(7) 0.013(7) 0.025(8) 0.000(6) 0.002(7) -0.001(7)
 O3A 0.011(7) 0.014(7) 0.031(8) -0.001(6) -0.002(6) 0.001(6)
 N1A 0.011(3) 0.011(4) 0.030(3) 0.000(3) 0.003(2) -0.003(3)
 C1A 0.008(11) 0.006(10) 0.014(10) -0.006(8) 0.000(9) 0.001(9)
 C2A 0.026(14) 0.021(13) 0.027(13) 0.001(9) -0.001(10) 0.002(10)
 C3A 0.011(11) 0.009(13) 0.016(11) -0.002(9) 0.008(8) -0.002(9)
 C4A 0.017(15) 0.012(14) 0.027(15) -0.002(9) 0.001(9) -0.007(9)
 C5A 0.008(11) 0.005(10) 0.011(10) 0.000(6) 0.003(7) 0.004(7)
 C6A 0.005(10) 0.006(11) 0.016(10) -0.003(9) 0.002(7) -0.003(10)
 C7A 0.025(9) 0.030(10) 0.019(9) 0.001(8) 0.000(8) 0.003(8)
 O5A 0.032(11) 0.033(10) 0.029(11) -0.002(9) -0.008(9) -0.015(9)
 C8A 0.022(9) 0.016(9) 0.033(10) -0.002(8) 0.000(8) -0.002(8)
 C9A 0.041(5) 0.030(4) 0.033(3) -0.012(3) 0.009(4) -0.011(3)
 C10A 0.058(19) 0.041(17) 0.041(17) -0.002(14) -0.002(16) 0.011(15)
 C11A 0.046(16) 0.042(17) 0.054(18) -0.020(15) -0.008(14) 0.013(14)
 C12A 0.062(19) 0.059(19) 0.040(18) -0.007(15) 0.019(15) 0.005(16)

_geom_special_details
;
 All esds (except the esd in the dihedral angle between two l.s. planes)
 are estimated using the full covariance matrix.  The cell esds are taken
 into account individually in the estimation of esds in distances, angles
 and torsion angles; correlations between esds in cell parameters are only
 used when they are defined by crystal symmetry.  An approximate (isotropic)
 treatment of cell esds is used for estimating esds involving l.s. planes.
;
loop_
  _geom_bond_atom_site_label_1
  _geom_bond_atom_site_label_2
  _geom_bond_distance
  _geom_bond_site_symmetry_2
  _geom_bond_publ_flag
 Gd1 O3 2.432(4) . ?
 Gd1 O3 2.431(4) 2 ?
 Gd1 O3 2.431(4) 3 ?
 Gd1 O3 2.431(4) 4 ?
 Gd1 O4 2.332(4) 2 ?
 Gd1 O4 2.332(4) 3 ?
 Gd1 O4 2.332(4) . ?
 Gd1 O4 2.332(4) 4 ?
 Gd1 O4A 2.247(18) . ?
 Gd1 O4A 2.247(18) 4 ?
 Gd1 O4A 2.247(18) 2 ?
 Gd1 O4A 2.247(18) 3 ?
 Mn1 O1 1.840(4) . ?
 Mn1 O2 1.937(5) 3 ?
 Mn1 O3 1.902(4) 3 ?
 Mn1 O5 2.088(4) . ?
 Mn1 N1 1.968(5) . ?
 O1 C1 1.349(8) . ?
 O2 C7 1.282(7) . ?
 O3 N1 1.414(9) . ?
 O4 C8 1.253(7) . ?
 O5 C8 1.247(8) . ?
 N1 C7 1.314(10) . ?
 C1 C2 1.411(11) . ?
 C1 C6 1.403(11) . ?
 C2 H2 0.9500 . ?
 C2 C3 1.370(15) . ?
 C3 H3 0.9500 . ?
 C3 C4 1.396(15) . ?
 C4 H4 0.9500 . ?
 C4 C5 1.381(14) . ?
 C5 H5 0.9500 . ?
 C5 C6 1.386(12) . ?
 C6 C7 1.476(9) . ?
 C8 C9 1.540(10) . ?
 C9 C10 1.528(7) . ?
 C9 C11 1.520(7) . ?
 C9 C12 1.535(7) . ?
 C10 H10A 0.9800 . ?
 C10 H10B 0.9800 . ?
 C10 H10C 0.9800 . ?
 C11 H11A 0.9800 . ?
 C11 H11B 0.9800 . ?
 C11 H11C 0.9800 . ?
 C12 H12A 0.9800 . ?
 C12 H12B 0.9800 . ?
 C12 H12C 0.9800 . ?
 O4A C8A 1.29(3) 4 ?
 Cl1 C17 1.759(7) . ?
 Cl2 C17 1.736(7) . ?
 C17 H17A 0.9900 . ?
 C17 H17B 0.9900 . ?
 Cl3 C18 1.770(8) . ?
 Cl4 C18 2.21(10) . ?
 C18 H18A 0.9900 . ?
 C18 H18B 0.9900 . ?
 N2 C13 1.516(8) . ?
 N2 C13 1.516(8) 8_655 ?
 N2 C13 1.516(8) 2_655 ?
 N2 C13 1.516(8) 7_665 ?
 C13 H13A 0.9900 . ?
 C13 H13B 0.9900 . ?
 C13 C14 1.505(10) . ?
 C14 H14A 0.9900 . ?
 C14 H14B 0.9900 . ?
 C14 H14C 0.9900 . ?
 C14 H14D 0.9900 . ?
 C14 C15 1.548(12) . ?
 C14 C15A 1.534(15) . ?
 C15 H15A 0.9900 . ?
 C15 H15B 0.9900 . ?
 C15 C16 1.511(13) . ?
 C16 H16A 0.9800 . ?
 C16 H16B 0.9800 . ?
 C16 H16C 0.9800 . ?
 C15A H15C 0.9900 . ?
 C15A H15D 0.9900 . ?
 C15A C16A 1.509(15) . ?
 C16A H16D 0.9800 . ?
 C16A H16E 0.9800 . ?
 C16A H16F 0.9800 . ?
 Mn1A O1A 1.81(2) . ?
 Mn1A O2A 1.95(2) 4 ?
 Mn1A O3A 1.878(17) . ?
 Mn1A N1A 2.03(4) . ?
 Mn1A O5A 2.09(2) 4 ?
 O1A C1A 1.37(4) . ?
 O2A C7A 1.22(3) . ?
 O3A N1A 1.41(5) 4 ?
 N1A C7A 1.31(5) . ?
 C1A C2A 1.37(5) . ?
 C1A C6A 1.36(4) . ?
 C2A H2A 0.9500 . ?
 C2A C3A 1.38(6) . ?
 C3A H3A 0.9500 . ?
 C3A C4A 1.36(6) . ?
 C4A H4A 0.9500 . ?
 C4A C5A 1.36(7) . ?
 C5A H5A 0.9500 . ?
 C5A C6A 1.45(5) . ?
 C6A C7A 1.49(4) . ?
 O5A C8A 1.33(3) . ?
 C8A C9A 1.50(4) . ?
 C9A C10A 1.526(10) . ?
 C9A C11A 1.526(10) . ?
 C9A C12A 1.526(10) . ?
 C10A H10D 0.9800 . ?
 C10A H10E 0.9800 . ?
 C10A H10F 0.9800 . ?
 C11A H11D 0.9800 . ?
 C11A H11E 0.9800 . ?
 C11A H11F 0.9800 . ?
 C12A H12D 0.9800 . ?
 C12A H12E 0.9800 . ?
 C12A H12F 0.9800 . ?

loop_
  _geom_angle_atom_site_label_1
  _geom_angle_atom_site_label_2
  _geom_angle_atom_site_label_3
  _geom_angle
  _geom_angle_site_symmetry_1
  _geom_angle_site_symmetry_3
  _geom_angle_publ_flag
 O3 Gd1 O3 66.10(10) 4 2 ?
 O3 Gd1 O3 66.10(10) 3 . ?
 O3 Gd1 O3 66.10(10) 4 . ?
 O3 Gd1 O3 66.10(10) 2 3 ?
 O3 Gd1 O3 100.93(19) 4 3 ?
 O3 Gd1 O3 100.93(19) 2 . ?
 O4 Gd1 O3 137.08(13) . 2 ?
 O4 Gd1 O3 77.06(14) 3 2 ?
 O4 Gd1 O3 145.73(13) 2 3 ?
 O4 Gd1 O3 137.08(13) 2 . ?
 O4 Gd1 O3 77.06(14) . 3 ?
 O4 Gd1 O3 77.06(14) 4 . ?
 O4 Gd1 O3 77.06(14) 2 4 ?
 O4 Gd1 O3 145.73(13) 4 2 ?
 O4 Gd1 O3 137.08(13) 3 4 ?
 O4 Gd1 O3 82.55(14) . . ?
 O4 Gd1 O3 82.54(14) 4 4 ?
 O4 Gd1 O3 82.54(14) 2 2 ?
 O4 Gd1 O3 82.54(14) 3 3 ?
 O4 Gd1 O3 145.73(13) . 4 ?
 O4 Gd1 O3 145.73(13) 3 . ?
 O4 Gd1 O3 137.08(13) 4 3 ?
 O4 Gd1 O4 77.06(9) 2 3 ?
 O4 Gd1 O4 123.5(2) 3 4 ?
 O4 Gd1 O4 77.06(9) 2 4 ?
 O4 Gd1 O4 77.06(9) . 3 ?
 O4 Gd1 O4 123.5(2) . 2 ?
 O4 Gd1 O4 77.06(9) . 4 ?
 O4A Gd1 O3 100.8(5) . 3 ?
 O4A Gd1 O3 164.3(5) 4 3 ?
 O4A Gd1 O3 164.3(5) . 2 ?
 O4A Gd1 O3 64.7(5) 3 3 ?
 O4A Gd1 O3 110.4(5) 2 3 ?
 O4A Gd1 O3 64.7(5) 2 2 ?
 O4A Gd1 O3 110.4(5) 4 2 ?
 O4A Gd1 O3 100.8(5) 3 2 ?
 O4A Gd1 O4 112.0(5) 4 3 ?
 O4A Gd1 O4 41.0(5) 4 2 ?
 O4A Gd1 O4 41.0(5) 2 3 ?
 O4A Gd1 O4 112.0(5) . 2 ?
 O4A Gd1 O4 110.9(5) 3 2 ?
 O4A Gd1 O4 39.3(5) 3 3 ?
 O4A Gd1 O4 110.9(5) . 3 ?
 O4A Gd1 O4 39.3(5) 2 2 ?
 O4A Gd1 O4A 79.8(4) 3 . ?
 O4A Gd1 O4A 79.8(4) 4 2 ?
 O4A Gd1 O4A 79.8(4) 3 2 ?
 O4A Gd1 O4A 130.2(10) 2 . ?
 O4A Gd1 O4A 79.8(4) 4 . ?
 O1 Mn1 O2 94.88(18) . 3 ?
 O1 Mn1 O3 165.6(2) . 3 ?
 O1 Mn1 O5 97.09(19) . . ?
 O1 Mn1 N1 90.4(3) . . ?
 O2 Mn1 O5 95.54(18) 3 . ?
 O2 Mn1 N1 159.1(3) 3 . ?
 O3 Mn1 O2 80.70(16) 3 3 ?
 O3 Mn1 O5 96.99(17) 3 . ?
 O3 Mn1 N1 89.2(3) 3 . ?
 N1 Mn1 O5 103.9(3) . . ?
 C1 O1 Mn1 130.0(5) . . ?
 C7 O2 Mn1 113.9(4) . 4 ?
 Mn1 O3 Gd1 119.11(17) 4 . ?
 N1 O3 Gd1 122.0(4) . . ?
 N1 O3 Mn1 113.7(3) . 4 ?
 C8 O4 Gd1 140.9(4) . . ?
 C8 O5 Mn1 122.4(4) . . ?
 O3 N1 Mn1 116.3(5) . . ?
 C7 N1 Mn1 131.0(6) . . ?
 C7 N1 O3 112.0(5) . . ?
 O1 C1 C2 116.7(9) . . ?
 O1 C1 C6 124.8(9) . . ?
 C6 C1 C2 118.5(7) . . ?
 C1 C2 H2 119.7 . . ?
 C3 C2 C1 120.6(9) . . ?
 C3 C2 H2 119.7 . . ?
 C2 C3 H3 119.7 . . ?
 C2 C3 C4 120.7(11) . . ?
 C4 C3 H3 119.7 . . ?
 C3 C4 H4 120.4 . . ?
 C5 C4 C3 119.1(11) . . ?
 C5 C4 H4 120.4 . . ?
 C4 C5 H5 119.4 . . ?
 C4 C5 C6 121.1(10) . . ?
 C6 C5 H5 119.4 . . ?
 C1 C6 C7 122.3(9) . . ?
 C5 C6 C1 120.0(7) . . ?
 C5 C6 C7 117.7(10) . . ?
 O2 C7 N1 119.6(6) . . ?
 O2 C7 C6 120.5(7) . . ?
 N1 C7 C6 119.9(7) . . ?
 O4 C8 C9 118.5(6) . . ?
 O5 C8 O4 124.9(6) . . ?
 O5 C8 C9 116.5(5) . . ?
 C10 C9 C8 111.4(6) . . ?
 C10 C9 C12 109.7(6) . . ?
 C11 C9 C8 107.1(6) . . ?
 C11 C9 C10 109.9(6) . . ?
 C11 C9 C12 109.5(6) . . ?
 C12 C9 C8 109.1(6) . . ?
 C9 C10 H10A 109.5 . . ?
 C9 C10 H10B 109.5 . . ?
 C9 C10 H10C 109.5 . . ?
 H10A C10 H10B 109.5 . . ?
 H10A C10 H10C 109.5 . . ?
 H10B C10 H10C 109.5 . . ?
 C9 C11 H11A 109.5 . . ?
 C9 C11 H11B 109.5 . . ?
 C9 C11 H11C 109.5 . . ?
 H11A C11 H11B 109.5 . . ?
 H11A C11 H11C 109.5 . . ?
 H11B C11 H11C 109.5 . . ?
 C9 C12 H12A 109.5 . . ?
 C9 C12 H12B 109.5 . . ?
 C9 C12 H12C 109.5 . . ?
 H12A C12 H12B 109.5 . . ?
 H12A C12 H12C 109.5 . . ?
 H12B C12 H12C 109.5 . . ?
 C8A O4A Gd1 144.7(17) 4 . ?
 Cl1 C17 H17A 109.3 . . ?
 Cl1 C17 H17B 109.3 . . ?
 Cl2 C17 Cl1 111.5(4) . . ?
 Cl2 C17 H17A 109.3 . . ?
 Cl2 C17 H17B 109.3 . . ?
 H17A C17 H17B 108.0 . . ?
 Cl3 C18 Cl4 95(3) . . ?
 Cl3 C18 H18A 112.8 . . ?
 Cl3 C18 H18B 112.8 . . ?
 Cl4 C18 H18A 112.8 . . ?
 Cl4 C18 H18B 112.8 . . ?
 H18A C18 H18B 110.3 . . ?
 C13 N2 C13 112.4(4) 2_655 7_665 ?
 C13 N2 C13 112.4(4) . 7_665 ?
 C13 N2 C13 103.7(7) 8_655 7_665 ?
 C13 N2 C13 103.7(7) . 2_655 ?
 C13 N2 C13 112.4(4) 8_655 2_655 ?
 C13 N2 C13 112.4(4) . 8_655 ?
 N2 C13 H13A 108.3 . . ?
 N2 C13 H13B 108.3 . . ?
 H13A C13 H13B 107.4 . . ?
 C14 C13 N2 116.1(7) . . ?
 C14 C13 H13A 108.3 . . ?
 C14 C13 H13B 108.3 . . ?
 C13 C14 H14A 111.8 . . ?
 C13 C14 H14B 111.8 . . ?
 C13 C14 H14C 106.1 . . ?
 C13 C14 H14D 106.1 . . ?
 C13 C14 C15 99.9(9) . . ?
 C13 C14 C15A 125.0(13) . . ?
 H14A C14 H14B 109.5 . . ?
 H14C C14 H14D 106.3 . . ?
 C15 C14 H14A 111.8 . . ?
 C15 C14 H14B 111.8 . . ?
 C15A C14 H14C 106.1 . . ?
 C15A C14 H14D 106.1 . . ?
 C14 C15 H15A 110.1 . . ?
 C14 C15 H15B 110.1 . . ?
 H15A C15 H15B 108.5 . . ?
 C16 C15 C14 107.8(12) . . ?
 C16 C15 H15A 110.1 . . ?
 C16 C15 H15B 110.1 . . ?
 C15 C16 H16A 109.5 . . ?
 C15 C16 H16B 109.5 . . ?
 C15 C16 H16C 109.5 . . ?
 H16A C16 H16B 109.5 . . ?
 H16A C16 H16C 109.5 . . ?
 H16B C16 H16C 109.5 . . ?
 C14 C15A H15C 110.3 . . ?
 C14 C15A H15D 110.3 . . ?
 H15C C15A H15D 108.5 . . ?
 C16A C15A C14 107.3(16) . . ?
 C16A C15A H15C 110.3 . . ?
 C16A C15A H15D 110.3 . . ?
 C15A C16A H16D 109.5 . . ?
 C15A C16A H16E 109.5 . . ?
 C15A C16A H16F 109.5 . . ?
 H16D C16A H16E 109.5 . . ?
 H16D C16A H16F 109.5 . . ?
 H16E C16A H16F 109.5 . . ?
 O1A Mn1A O3A 164.9(9) . . ?
 O1A Mn1A N1A 90.4(16) . . ?
 O1A Mn1A O5A 97.8(8) . 4 ?
 O2A Mn1A N1A 160.7(16) 4 . ?
 O2A Mn1A O5A 94.7(8) 4 4 ?
 O3A Mn1A N1A 88.1(15) . . ?
 O3A Mn1A O5A 97.2(8) . 4 ?
 N1A Mn1A O5A 102.9(16) . 4 ?
 C1A O1A Mn1A 130(2) . . ?
 C7A O2A Mn1A 112.6(18) . 3 ?
 Mn1A O3A Gd1 119.6(8) . . ?
 N1A O3A Gd1 121.5(19) 4 . ?
 N1A O3A Mn1A 111.1(18) 4 . ?
 O3A N1A Mn1A 115(3) 3 . ?
 C7A N1A Mn1A 131(3) . . ?
 C7A N1A O3A 114(3) . 3 ?
 C2A C1A O1A 117(4) . . ?
 C6A C1A O1A 123(4) . . ?
 C6A C1A C2A 119(4) . . ?
 C1A C2A H2A 119.2 . . ?
 C1A C2A C3A 122(5) . . ?
 C3A C2A H2A 119.2 . . ?
 C2A C3A H3A 119.0 . . ?
 C4A C3A C2A 122(5) . . ?
 C4A C3A H3A 119.0 . . ?
 C3A C4A H4A 121.8 . . ?
 C3A C4A C5A 116(5) . . ?
 C5A C4A H4A 121.8 . . ?
 C4A C5A H5A 118.6 . . ?
 C4A C5A C6A 123(3) . . ?
 C6A C5A H5A 118.6 . . ?
 C1A C6A C5A 117(3) . . ?
 C1A C6A C7A 127(4) . . ?
 C5A C6A C7A 116(4) . . ?
 O2A C7A N1A 120(3) . . ?
 O2A C7A C6A 123(3) . . ?
 N1A C7A C6A 116(3) . . ?
 C8A O5A Mn1A 125.7(16) . 3 ?
 O4A C8A O5A 118(2) 3 . ?
 O4A C8A C9A 125(3) 3 . ?
 O5A C8A C9A 117(2) . . ?
 C8A C9A C10A 111(3) . . ?
 C8A C9A C11A 108(2) . . ?
 C8A C9A C12A 108(3) . . ?
 C11A C9A C10A 110.3(12) . . ?
 C11A C9A C12A 109.7(12) . . ?
 C12A C9A C10A 110.1(12) . . ?
 C9A C10A H10D 109.5 . . ?
 C9A C10A H10E 109.5 . . ?
 C9A C10A H10F 109.5 . . ?
 H10D C10A H10E 109.5 . . ?
 H10D C10A H10F 109.5 . . ?
 H10E C10A H10F 109.5 . . ?
 C9A C11A H11D 109.5 . . ?
 C9A C11A H11E 109.5 . . ?
 C9A C11A H11F 109.5 . . ?
 H11D C11A H11E 109.5 . . ?
 H11D C11A H11F 109.5 . . ?
 H11E C11A H11F 109.5 . . ?
 C9A C12A H12D 109.5 . . ?
 C9A C12A H12E 109.5 . . ?
 C9A C12A H12F 109.5 . . ?
 H12D C12A H12E 109.5 . . ?
 H12D C12A H12F 109.5 . . ?
 H12E C12A H12F 109.5 . . ?

_shelx_res_file
;
TITL ata520c_0m_a.res in P4/n
    ata520c_0m.res
    created by SHELXL-2016/6 at 14:15:11 on 04-Jun-2018
REM Old TITL ata_520c_0m_a.res in P4/n
REM SHELXT solution in P4/n
REM R1 0.161, Rweak 0.015, Alpha 0.032, Orientation as input
REM Formula found by SHELXT: C66 Cl8 Gd Mn4 N8 O24
CELL 0.71073 18.9025 18.9025 12.2959 90 90 90
ZERR 2 0.0009 0 0.0006 0 0 0
LATT 1
SYMM 0.5-X,0.5-Y,+Z
SYMM 0.5-Y,+X,+Z
SYMM +Y,0.5-X,+Z
SFAC C H Cl Gd Mn N O
UNIT 138 196 20 2 8 10 40
DFIX 1.77 0.01 Cl3 C18 Cl3 C18
DFIX 2.89 Cl3 Cl4
SADI C10 C11 C10 C12 C11 C12 C10A C11A C10A C12A C11A C12A
SADI C13 C14 C14 C15 C15 C16 C14 C15A C15A C16A
SADI 0.01 C9 C10 C9 C11 C9 C12 C9A C10A C9A C11A C9A C12A
ISOR 0.01 0.02 O3A O1A O2A O4A
ISOR 0.01 0.02 C8A
ISOR 0.01 0.02 C7A C6A C4A C3A C4 C2A C1A C2 C3 C1 C6 C5
ISOR 0.01 0.02 C12A C10A C11A
ISOR 0.007 0.01 C5A
ISOR 0.01 0.02 C18
EADP Cl3 Cl4
EADP N1A N1
EADP C9 C9A

L.S. 10
PLAN  40
SIZE 0.05 0.4 0.5
TEMP -100(2)
BOND $H
LIST 6
fmap 2
ACTA 50
OMIT -2 50
OMIT 0 0 1
REM <olex2.extras>
REM <HklSrc "%.\\ATA520C_0m.hkl">
REM </olex2.extras>

WGHT    0.021500   17.766602
FVAR       0.23082   0.82144
GD1   4    0.250000    0.250000    0.649037    10.25000    0.01628    0.01628 =
         0.02820    0.00000    0.00000    0.00000
PART 1
MN1   5    0.363028    0.381871    0.502421    21.00000    0.01487    0.01472 =
         0.03173    0.00122    0.00330   -0.00028
O1    7    0.447648    0.412982    0.446109    21.00000    0.01739    0.01786 =
         0.05007    0.00425    0.00962   -0.00099
O2    7    0.465296    0.189672    0.459792    21.00000    0.01638    0.01635 =
         0.04398   -0.00329    0.00729   -0.00027
O3    7    0.347268    0.230476    0.523159    21.00000    0.01513    0.01267 =
         0.03153    0.00025    0.00567   -0.00304
O4    7    0.334123    0.318794    0.738788    21.00000    0.02624    0.02305 =
         0.03203   -0.00302   -0.00588   -0.00175
O5    7    0.380469    0.414396    0.662469    21.00000    0.03522    0.02899 =
         0.02742   -0.00460    0.00290   -0.00891
N1    6    0.397642    0.283676    0.499794    21.00000    0.01137    0.01083 =
         0.02956    0.00040    0.00318   -0.00263
C1    1    0.509233    0.378102    0.432110    21.00000    0.01722    0.02178 =
         0.02312    0.00005   -0.00097    0.00039
C2    1    0.569437    0.419668    0.409226    21.00000    0.02628    0.02398 =
         0.03218    0.00464    0.00293   -0.01041
AFIX  43
H2    2    0.565208    0.469694    0.405658    21.00000   -1.20000
AFIX   0
C3    1    0.633924    0.388521    0.392110    21.00000    0.02021    0.03344 =
         0.03580   -0.00342    0.00420   -0.00793
AFIX  43
H3    2    0.673721    0.417079    0.374818    21.00000   -1.20000
AFIX   0
C4    1    0.641771    0.315246    0.399815    21.00000    0.01706    0.03337 =
         0.05089    0.00741    0.00503    0.00329
AFIX  43
H4    2    0.686913    0.293995    0.390529    21.00000   -1.20000
AFIX   0
C5    1    0.583014    0.274069    0.421121    21.00000    0.02828    0.02373 =
         0.03344    0.00090   -0.00100    0.00133
AFIX  43
H5    2    0.587798    0.224079    0.424185    21.00000   -1.20000
AFIX   0
C6    1    0.517210    0.304436    0.438102    21.00000    0.01503    0.01904 =
         0.02795   -0.00130    0.00090    0.00116
C7    1    0.457981    0.256972    0.466258    21.00000    0.02066    0.02140 =
         0.01983    0.00328   -0.00165   -0.00061
C8    1    0.357247    0.380895    0.742193    21.00000    0.01975    0.02805 =
         0.03686   -0.00294   -0.00828   -0.00212
C9    1    0.355448    0.420605    0.851538    21.00000    0.04103    0.03035 =
         0.03307   -0.01192    0.00910   -0.01058
C10   1    0.339211    0.370552    0.945848    21.00000    0.05916    0.04398 =
         0.03568   -0.00534    0.00557   -0.00646
AFIX 137
H10A  2    0.293272    0.347858    0.933694    21.00000   -1.50000
H10B  2    0.337815    0.397418    1.013980    21.00000   -1.50000
H10C  2    0.376131    0.334272    0.950367    21.00000   -1.50000
AFIX   0
C11   1    0.298023    0.476653    0.842931    21.00000    0.08060    0.03780 =
         0.06126   -0.00974    0.03026    0.00532
AFIX 137
H11A  2    0.309370    0.509213    0.783412    21.00000   -1.50000
H11B  2    0.295244    0.503056    0.911389    21.00000   -1.50000
H11C  2    0.252443    0.453815    0.828444    21.00000   -1.50000
AFIX   0
C12   1    0.427270    0.456508    0.870378    21.00000    0.06347    0.05662 =
         0.04713   -0.02359    0.00419   -0.02825
AFIX 137
H12A  2    0.464820    0.420770    0.869117    21.00000   -1.50000
H12B  2    0.427060    0.480301    0.941191    21.00000   -1.50000
H12C  2    0.435771    0.491371    0.812853    21.00000   -1.50000
AFIX   0
PART 0
PART 2
O4A   7    0.357463    0.241069    0.725962   -21.00000    0.02612    0.03401 =
         0.03065   -0.00428   -0.01131    0.00628

PART 0
CL1   3    0.653375    0.096649    0.288091    11.00000    0.05827    0.10848 =
         0.06132    0.00431    0.00935    0.00988
CL2   3    0.515341    0.111546    0.189811    11.00000    0.09480    0.10463 =
         0.07512   -0.00034   -0.02646    0.03477
C17   1    0.561862    0.083059    0.303393    11.00000    0.05697    0.05182 =
         0.04633   -0.01095   -0.00362    0.01037
AFIX  23
H17A  2    0.552649    0.032077    0.315205    11.00000   -1.20000
H17B  2    0.544970    0.109070    0.368273    11.00000   -1.20000
AFIX   0

PART -1
CL3   3    0.309814    0.329444    0.243087    10.25000    0.12305    0.43622 =
         0.07835    0.08750   -0.00402   -0.03404
CL4   3    0.158171    0.294973    0.248880    10.25000    0.12305    0.43622 =
         0.07835    0.08750   -0.00402   -0.03404
C18   1    0.264905    0.248033    0.260325    10.25000    0.14182    0.14011 =
         0.14482    0.00015   -0.00304   -0.00025
AFIX  23
H18A  2    0.274178    0.225987    0.331954    10.25000   -1.20000
H18B  2    0.274806    0.213921    0.201156    10.25000   -1.20000
AFIX   0

PART 0
N2    6    0.750000    0.250000    0.000000    10.25000    0.08328    0.08328 =
         0.04716    0.00000    0.00000    0.00000
C13   1    0.693200    0.277462    0.076171    11.00000    0.09068    0.09572 =
         0.05678   -0.01322    0.01122   -0.01918
AFIX  23
H13A  2    0.676972    0.237716    0.122288    11.00000   -1.20000
H13B  2    0.714871    0.313122    0.124827    11.00000   -1.20000
AFIX   0
C14   1    0.629437    0.310265    0.023008    11.00000    0.07293    0.11788 =
         0.09194   -0.04454   -0.00155   -0.00708
PART 1
AFIX  23
H14A  2    0.606768    0.277534   -0.029300    10.60000   -1.20000
H14B  2    0.641368    0.355163   -0.014172    10.60000   -1.20000
AFIX  23
PART 0
PART 2
H14C  2    0.605461    0.271567   -0.016803    10.40000   -1.20000
H14D  2    0.647940    0.343071   -0.032940    10.40000   -1.20000
AFIX   0
PART 0
PART 1
C15   1    0.582584    0.322784    0.124442    10.60000    0.08610    0.05472 =
         0.05760   -0.00231   -0.00818    0.00468
AFIX  23
H15A  2    0.575251    0.277752    0.163977    10.60000   -1.20000
H15B  2    0.605769    0.356788    0.174239    10.60000   -1.20000
AFIX   0
C16   1    0.512456    0.351970    0.086078    10.60000    0.06561    0.08616 =
         0.11990   -0.04198   -0.01966   -0.00046
AFIX 137
H16A  2    0.495471    0.324073    0.024180    10.60000   -1.50000
H16B  2    0.518481    0.401375    0.063758    10.60000   -1.50000
H16C  2    0.477942    0.349388    0.145419    10.60000   -1.50000
AFIX   0
PART 0
PART 2
C15A  1    0.570987    0.350729    0.083114    10.40000    0.08848    0.04357 =
         0.07796    0.00274   -0.03026   -0.00404
AFIX  23
H15C  2    0.591725    0.380732    0.140896    10.40000   -1.20000
H15D  2    0.544830    0.381516    0.031873    10.40000   -1.20000
AFIX   0
C16A  1    0.521868    0.296492    0.132125    10.40000    0.09090    0.08536 =
         0.06023   -0.01849   -0.01358    0.00948
AFIX 137
H16D  2    0.498218    0.270195    0.073849    10.40000   -1.50000
H16E  2    0.486335    0.320410    0.177031    10.40000   -1.50000
H16F  2    0.549145    0.263642    0.177331    10.40000   -1.50000
AFIX   0

MN1A  5    0.415621    0.198309    0.490530   -21.00000    0.01118    0.00979 =
         0.02883   -0.00302    0.00224   -0.00192
O1A   7    0.501958    0.217155    0.434049   -21.00000    0.01920    0.01617 =
         0.03097   -0.00467    0.00716    0.00957
O2A   7    0.401864    0.416261    0.451057   -21.00000    0.01330    0.01263 =
         0.02487    0.00001    0.00247   -0.00128
O3A   7    0.318881    0.179735    0.510668   -21.00000    0.01099    0.01371 =
         0.03060   -0.00126   -0.00173    0.00097
N1A   6    0.391648    0.303242    0.489392   -21.00000    0.01137    0.01083 =
         0.02956    0.00040    0.00318   -0.00263
C1A   1    0.537496    0.280178    0.426101   -21.00000    0.00827    0.00630 =
         0.01434   -0.00650   -0.00032    0.00074
C2A   1    0.609012    0.277309    0.408429   -21.00000    0.02650    0.02139 =
         0.02725    0.00064   -0.00094    0.00201
AFIX  43
H2A   2    0.631825    0.232548    0.406327   -21.00000   -1.20000
AFIX   0
C3A   1    0.648645    0.337663    0.393640   -21.00000    0.01125    0.00865 =
         0.01621   -0.00180    0.00754   -0.00178
AFIX  43
H3A   2    0.696971    0.333262    0.373535   -21.00000   -1.20000
AFIX   0
C4A   1    0.620681    0.403403    0.406951   -21.00000    0.01687    0.01235 =
         0.02701   -0.00229    0.00065   -0.00687
AFIX  43
H4A   2    0.649359    0.444670    0.405897   -21.00000   -1.20000
AFIX   0
C5A   1    0.549298    0.406906    0.421887   -21.00000    0.00828    0.00492 =
         0.01121    0.00000    0.00342    0.00366
AFIX  43
H5A   2    0.527243    0.452062    0.422734   -21.00000   -1.20000
AFIX   0
C6A   1    0.505549    0.344391    0.436566   -21.00000    0.00521    0.00614 =
         0.01625   -0.00299    0.00163   -0.00266
C7A   1    0.429295    0.358072    0.459571   -21.00000    0.02454    0.02954 =
         0.01916    0.00069    0.00008    0.00298
O5A   7    0.318970    0.447265    0.650935   -21.00000    0.03246    0.03278 =
         0.02932   -0.00184   -0.00813   -0.01543
C8A   1    0.299487    0.411638    0.739242   -21.00000    0.02164    0.01624 =
         0.03255   -0.00155    0.00049   -0.00182
C9A   1    0.329864    0.434980    0.845641   -21.00000    0.04103    0.03035 =
         0.03307   -0.01192    0.00910   -0.01058
C10A  1    0.305967    0.386163    0.937451   -21.00000    0.05810    0.04128 =
         0.04061   -0.00177   -0.00179    0.01119
AFIX 137
H10D  2    0.260314    0.364887    0.918555   -21.00000   -1.50000
H10E  2    0.301059    0.413521    1.004732   -21.00000   -1.50000
H10F  2    0.341184    0.348741    0.948011   -21.00000   -1.50000
AFIX   0
C11A  1    0.304855    0.510485    0.866811   -21.00000    0.04650    0.04193 =
         0.05351   -0.02047   -0.00787    0.01343
AFIX 137
H11D  2    0.313684    0.522844    0.943016   -21.00000   -1.50000
H11E  2    0.254081    0.513948    0.851600   -21.00000   -1.50000
H11F  2    0.330738    0.543157    0.819416   -21.00000   -1.50000
AFIX   0
C12A  1    0.410336    0.433687    0.835901   -21.00000    0.06193    0.05945 =
         0.04036   -0.00672    0.01925    0.00528
AFIX 137
H12D  2    0.429964    0.401566    0.890706   -21.00000   -1.50000
H12E  2    0.429039    0.481441    0.847580   -21.00000   -1.50000
H12F  2    0.423684    0.417224    0.763164   -21.00000   -1.50000
AFIX   0
HKLF 4


REM  ata520c_0m_a.res in P4/n
REM R1 =  0.0431 for    3426 Fo > 4sig(Fo)  and  0.0524 for all    3880 data
REM    447 parameters refined using    175 restraints

END

WGHT      0.0215     17.7669

REM Highest difference peak  0.649,  deepest hole -0.986,  1-sigma level  0.093
Q1    1   0.2500  0.2500  0.1887  10.25000  0.05    0.65
Q2    1   0.2500  0.2500  0.2916  10.25000  0.05    0.63
Q3    1   0.2500  0.2500  0.9693  10.25000  0.05    0.51
Q4    1   0.6212  0.1042  0.2399  11.00000  0.05    0.47
Q5    1   0.3644  0.3272  0.2221  11.00000  0.05    0.45
Q6    1   0.5146  0.1596  0.1815  11.00000  0.05    0.43
Q7    1   0.2651  0.1954  0.6851  11.00000  0.05    0.42
Q8    1   0.5425  0.1086  0.2420  11.00000  0.05    0.40
Q9    1   0.4743  0.3640  0.6539  11.00000  0.05    0.39
Q10   1   0.4827  0.0947  0.2006  11.00000  0.05    0.39
Q11   1   0.1254  0.2469  0.2231  11.00000  0.05    0.38
Q12   1   0.2500  0.2500  0.9097  10.25000  0.05    0.38
Q13   1   0.2973  0.2341  0.7161  11.00000  0.05    0.38
Q14   1   0.6586  0.0438  0.2772  11.00000  0.05    0.37
Q15   1   0.4317  0.3011  0.3611  11.00000  0.05    0.37
Q16   1   0.3140  0.3444  0.2606  11.00000  0.05    0.37
Q17   1   0.5426  0.0924  0.1373  11.00000  0.05    0.35
Q18   1   0.3581  0.3708  0.4188  11.00000  0.05    0.32
Q19   1   0.2791  0.3016  1.0430  11.00000  0.05    0.31
Q20   1   0.2363  0.4918  0.9553  11.00000  0.05    0.31
Q21   1   0.3404  0.3171  0.1776  11.00000  0.05    0.30
Q22   1   0.6826  0.1396  0.2501  11.00000  0.05    0.30
Q23   1   0.5251  0.3218  0.3711  11.00000  0.05    0.30
Q24   1   0.3038  0.2222  0.3622  11.00000  0.05    0.30
Q25   1   0.3380  0.3898  0.8777  11.00000  0.05    0.29
Q26   1   0.3723  0.3821  0.4003  11.00000  0.05    0.29
Q27   1   0.1238  0.2382  0.2952  11.00000  0.05    0.28
Q28   1   0.3840  0.1953  0.5133  11.00000  0.05    0.28
Q29   1   0.3450  0.3536  0.3141  11.00000  0.05    0.28
Q30   1   0.3776  0.4192  0.5717  11.00000  0.05    0.27
Q31   1   0.4183  0.1689  0.4589  11.00000  0.05    0.27
Q32   1   0.6369  0.3571  0.3391  11.00000  0.05    0.27
Q33   1   0.3959  0.3160  0.5223  11.00000  0.05    0.26
Q34   1   0.6036  0.3992  0.3684  11.00000  0.05    0.26
Q35   1   0.6621  0.2867  0.0284  11.00000  0.05    0.26
Q36   1   0.3373  0.4167  0.8054  11.00000  0.05    0.26
Q37   1   0.6743  0.3354  0.4133  11.00000  0.05    0.26
Q38   1   0.6111  0.4077  0.4561  11.00000  0.05    0.25
Q39   1   0.5269  0.3138  0.0615  11.00000  0.05    0.25
Q40   1   0.6662  0.3825  0.2592  11.00000  0.05    0.25
;
_shelx_res_checksum                60880
_shelx_hkl_file
;
   1   0   0    0.28    0.43
   1   0   0   -0.24    0.38
  -1   0   0   -0.06    0.36
   0  -1   0    0.08    0.54
   0  -1   0    0.11    0.20
   0  -1   0    0.07    0.35
   0   1   0    0.28    0.40
   0   1   0    0.10    0.19
   0   1   0    0.07    0.28
  -1   0   0    0.22    0.37
  -1   1   0 3795.42   75.16
  -1   1   0 3218.04   74.09
  -1   2   0    5.82    1.79
   1  -2   0    4.15    1.23
  -1   2   0    5.16    1.67
   2   1   0    3.87    1.27
   1  -2   0    4.87    1.67
   2   1   0    4.70    1.71
  -2  -1   0    3.71    1.19
   2   0   0  907.99   21.73
   0   2   0  918.72   22.50
   2   0   0  944.81   22.43
   0  -2   0  917.57   21.60
   0  -2   0  916.61   20.99
   2  -1   0    8.94    2.04
  -2   1   0   14.20    2.28
  -1  -2   0    6.88    1.58
  -2   1   0    9.56    2.05
   1   2   0    3.51    1.88
  -2  -2   0  392.38    9.65
  -2   2   0  402.62   12.34
   2  -2   0  383.09   10.68
   2   2   0  386.75   12.53
   2  -2   0  378.89   12.08
  -2   3   0   47.79    5.88
   3   2   0   50.37    5.62
   3   2   0   45.58    3.57
  -2   3   0   46.01    5.21
   2  -3   0   43.36    3.83
  -3  -2   0   44.29    3.52
   2  -3   0   39.08    4.53
   1  -3   0   14.59    3.09
  -1   3   0   29.24    3.56
   3   1   0   17.42    3.19
   1  -3   0   21.82    2.92
   3   1   0   25.85    3.23
  -3  -1   0   31.24    3.36
  -1   3   0   23.54    4.03
   3   0   0   16.21    3.25
   0  -3   0   22.85    2.82
   0  -3   0   21.76    3.01
   0   3   0   24.88    3.82
  -3   0   0   28.29    3.65
   3   0   0   24.91    3.45
  -1  -3   0  668.69   18.04
  -1  -3   0  669.08   15.57
   3  -1   0  620.68   18.70
   1   3   0  662.18   19.07
   3  -1   0  675.14   18.42
   2   3   0   11.07    3.99
   3  -2   0    6.69    3.61
  -3   2   0   10.53    3.48
  -2  -3   0    6.68    2.82
  -3  -3   0  384.38   10.29
   3   3   0  393.54   14.71
  -3   3   0  392.62   14.10
   3  -3   0  369.44   13.82
  -3  -3   0  391.36   13.36
  -3   4   0   15.34    4.41
   4   3   0   24.23    3.09
   3  -4   0   23.06    3.58
   3  -4   0   12.47    3.87
  -4  -3   0   26.65    3.16
   4   3   0   21.04    4.95
   4   2   0  629.36   16.65
   4   2   0  587.71   18.99
  -4  -2   0  623.60   16.55
   2  -4   0  604.89   16.97
  -2   4   0  640.46   19.67
   2  -4   0  591.73   18.26
   4   1   0    6.54    3.50
  -1   4   0    5.75    3.26
  -1   4   0    3.12    2.83
  -4  -1   0    5.30    2.80
   1  -4   0   -1.13    2.56
   4   1   0    0.04    2.57
   1  -4   0    5.44    2.68
   0  -4   0 3372.21   74.75
   0  -4   0 3441.69   76.24
   0   4   0 3355.46   78.00
   4   0   0 3458.71   77.79
   4   0   0 3452.94   76.57
   1   4   0   52.67    3.80
   4  -1   0   51.82    5.66
   4  -1   0   54.97    6.30
  -1  -4   0   47.24    5.30
   1   4   0   47.22    6.16
  -1  -4   0   47.48    3.72
   4  -2   0 9931.17  213.30
  -2  -4   0 9999.00  208.12
  -4   2   0 9720.21  213.78
  -2  -4   0 9981.62  212.66
   2   4   0 9906.70  214.40
   3   4   0   45.09    6.16
  -3  -4   0   34.14    5.10
  -4   3   0   68.02    7.00
   4  -3   0   52.38    6.46
  -4  -4   0 3126.35   73.49
  -4  -4   0 3173.57   68.60
   4  -4   0 3027.70   73.96
  -4   4   0 3321.68   75.20
   4   4   0 3139.67   75.42
  -5  -4   0   39.40    3.93
   4  -5   0   41.41    5.07
   4  -5   0   40.57    6.15
  -4   5   0   40.55    6.27
   5   4   0   33.96    6.67
   5   3   0  822.75   25.51
  -3   5   0  814.08   25.45
   3  -5   0  806.50   24.47
  -5  -3   0  800.56   21.26
   3  -5   0  831.84   22.40
   5   3   0  825.94   21.45
   5   2   0   -0.27    2.94
  -5  -2   0   -0.98    2.39
  -2   5   0    2.72    3.09
   2  -5   0    2.39    2.40
   2  -5   0    2.40    3.00
   5   2   0    0.78    2.35
   1  -5   0  338.88   12.20
   5   1   0  351.84   13.99
   1  -5   0  341.50   12.33
  -1   5   0  336.54   14.19
   5   1   0  358.10   12.50
   0   5   0   12.38    4.67
   0  -5   0   16.77    3.74
   5   0   0   19.93    4.14
   0  -5   0   22.10    3.62
   5   0   0   14.01    3.98
   5  -1   0  118.17    8.60
   1   5   0  128.03    8.93
   1   5   0  133.48    5.94
  -1  -5   0  115.52    7.58
   5  -1   0  125.85    8.38
  -1  -5   0  124.64    5.86
   2   5   0   16.25    4.61
  -5   2   0   14.66    4.42
  -2  -5   0   28.53    2.81
  -2  -5   0   22.20    4.50
   5  -2   0   25.18    4.80
   3   5   0  738.43   24.73
  -3  -5   0  724.01   22.80
  -5   3   0  752.07   23.99
   5  -3   0  766.84   23.96
   5  -4   0   80.71    8.68
  -4  -5   0   46.42    6.09
  -5   4   0   55.11    7.17
  -4  -5   0   58.07    3.84
  -4  -5   0   68.60    3.36
   4   5   0   45.47    6.75
  -5   5   0 1756.97   46.79
   5   5   0 1675.51   46.95
   5  -5   0 1698.11   45.89
  -5  -5   0 1728.78   45.39
  -5  -5   0 1715.78   39.22
   5  -6   0   -4.29    2.65
   5  -6   0   -2.37    4.33
  -6  -5   0    2.64    4.26
  -6  -5   0    0.01    2.41
   6   5   0    2.74    5.54
  -5   6   0   -4.28    4.28
   4  -6   0 1038.60   31.20
   6   4   0 1022.11   26.72
  -4   6   0 1035.54   32.11
  -6  -4   0 1080.23   28.45
   6   4   0 1059.71   32.56
   4  -6   0  995.31   28.01
  -3   6   0    2.94    3.93
   3  -6   0    1.07    2.55
   6   3   0    3.02    2.72
   3  -6   0    5.22    4.07
   6   3   0    4.49    3.84
  -2   6   0   55.85    7.61
   6   2   0   61.24    7.68
   2  -6   0   53.63    6.23
   6   2   0   66.22    6.14
   2  -6   0   49.98    5.66
   1  -6   0   -0.19    2.66
   1  -6   0    3.92    2.92
   6   1   0    0.21    2.86
  -1   6   0    0.35    3.33
   6   1   0    4.69    3.66
   0  -6   0  336.64   13.24
   0  -6   0  322.75   11.66
   6   0   0  336.39   14.68
   0   6   0  330.77   15.21
   6   0   0  359.37   14.06
   6  -1   0   81.72    8.94
  -1  -6   0   61.29    4.99
   1   6   0   64.70    5.16
  -1  -6   0   72.27    7.30
   6  -1   0   44.06    6.16
   1   6   0   53.99    7.16
  -2  -6   0  818.77   20.12
  -2  -6   0  806.85   24.65
   2   6   0  808.47   26.84
   2   6   0  791.66   18.26
  -6   2   0  733.70   25.71
   6  -2   0  833.48   25.63
   6  -3   0   14.68    4.82
   3   6   0    4.51    4.09
  -3  -6   0    9.49    2.24
  -3  -6   0    8.73    4.31
  -6   3   0    9.20    4.56
  -6   4   0 1626.51   45.55
  -4  -6   0 1654.69   44.50
   4   6   0 1691.56   46.94
   6  -4   0 1695.57   45.68
  -5  -6   0   33.98    6.49
   6  -5   0   52.77    8.61
   5   6   0   31.65    7.21
  -5  -6   0   49.52    4.12
  -6   5   0   33.34    7.13
  -6  -6   0  425.38   12.55
   6  -6   0  386.74   18.68
  -6  -6   0  409.80   18.61
  -6   6   0  381.08   19.07
   6   6   0  397.57   20.02
  -7  -6   0   14.61    4.11
  -6   7   0   15.30    6.72
  -7  -6   0   14.48    5.92
   6  -7   0    9.20    7.42
   7   6   0   10.30    7.66
   7   5   0   63.51   10.01
   5  -7   0   56.73    9.75
  -5   7   0   50.25    8.91
  -7  -5   0   58.62    8.45
   5  -7   0   62.57    7.14
   7   4   0   83.97   10.17
   4  -7   0  120.07    8.38
  -4   7   0  112.73   11.55
   7   4   0  122.31    8.22
   4  -7   0  127.55   12.01
   7   3   0  202.75   10.18
  -3   7   0  203.52   13.45
   3  -7   0  222.10   12.44
   3  -7   0  217.30   10.68
   7   3   0  208.48   13.17
  -2   7   0    5.34    4.56
   7   2   0    0.90    3.17
   2  -7   0    1.88    3.60
   7   2   0   -0.65    3.84
   2  -7   0    2.89    3.29
   1  -7   0  849.58   25.02
   7   1   0  805.87   25.02
  -1   7   0  841.22   28.19
   1  -7   0  790.95   23.97
   7   1   0  823.76   26.93
   0  -7   0    4.71    3.50
   0   7   0   -4.60    4.05
   0  -7   0    6.43    3.16
   7   0   0   -0.90    3.31
   7   0   0   -0.20    3.64
   7  -1   0  564.18   22.12
  -1  -7   0  619.08   17.59
   7  -1   0  593.40   21.22
  -1  -7   0  596.82   20.64
   1   7   0  599.24   23.03
   7  -2   0   33.07    6.29
   2   7   0   46.81    3.56
   2   7   0   46.19    8.10
  -2  -7   0   45.23    4.42
  -2  -7   0   42.09    6.54
  -7   2   0   20.36    6.08
  -7   3   0   60.61    8.67
  -3  -7   0   58.30    4.47
   3   7   0   67.42    9.89
  -3  -7   0   60.24    7.92
   7  -3   0   59.68    8.07
  -7   4   0    4.89    5.25
  -4  -7   0   -0.65    2.07
   4   7   0    1.95    5.77
   7  -4   0    7.99    5.63
  -4  -7   0    2.22    5.01
  -5  -7   0  257.48   14.87
  -5  -7   0  308.91    9.63
   5   7   0  328.81   18.37
  -7   5   0  309.75   17.00
   7  -5   0  293.87   16.58
  -6  -7   0   16.63    6.82
  -6  -7   0   20.17    3.37
   7  -6   0   11.05    6.79
  -7   6   0   24.95    7.50
   6   7   0   14.56    7.70
  -7  -7   0 1675.38   40.27
   7  -7   0 1760.99   50.80
  -7   7   0 1768.24   51.10
   7   7   0 1715.81   51.58
  -7  -7   0 1727.62   49.51
   8   7   0   -9.46    5.70
  -7   8   0   -2.31    5.66
   7  -8   0   -3.93    5.21
  -8  -7   0   -1.28    5.06
   6  -8   0  275.85   13.53
  -8  -6   0  291.54   16.33
   6  -8   0  269.54   17.14
   8   6   0  294.15   17.76
  -6   8   0  274.96   17.44
  -8  -5   0   94.99   10.46
   8   5   0   72.30   10.57
   5  -8   0  134.62   13.23
   5  -8   0  123.65   10.39
  -5   8   0   94.20   12.30
   8   4   0  409.73   20.49
   4  -8   0  399.87   18.58
  -4   8   0  444.50   21.22
   8   4   0  438.53   16.19
   4  -8   0  427.26   16.90
   3  -8   0   52.96    7.17
  -3   8   0   34.56    7.94
   8   3   0   61.99    7.36
   8   3   0   63.49    9.80
   3  -8   0   67.07    9.22
   2  -8   0 3667.93   87.56
   8   2   0 3817.94   91.51
  -2   8   0 3852.17   92.53
   2  -8   0 3722.12   87.63
   8   2   0 3688.92   87.23
   1  -8   0  114.64    9.18
  -1   8   0   88.44   11.34
   8   1   0   94.50   10.94
   8   1   0  109.70   10.49
   1  -8   0   96.39    9.53
   0  -8   0 1817.65   48.01
   8   0   0 1859.09   51.02
   0  -8   0 1856.53   45.61
   8   0   0 1817.26   48.56
   0   8   0 1824.16   51.72
   1   8   0    5.10    6.10
  -1  -8   0   -3.27    3.88
   8  -1   0    4.04    5.33
  -1  -8   0   -6.21    2.87
   8  -1   0   -3.71    5.00
   2   8   0    3.42    2.91
  -2  -8   0   -3.37    3.09
   8  -2   0   10.27    6.41
  -2  -8   0    7.26    4.79
  -8   2   0    3.76    5.48
   2   8   0   13.11    7.05
   8  -3   0   45.99    8.40
   3   8   0   32.20    8.04
  -8   3   0   36.57    8.51
  -3  -8   0   42.83    7.73
  -3  -8   0   47.35    4.78
  -8   4   0  178.59   14.00
  -4  -8   0  162.33   12.96
   4   8   0  200.77   15.07
  -4  -8   0  179.45    7.37
   8  -4   0  188.17   13.67
  -8   5   0   21.69    7.52
  -5  -8   0   15.79    6.64
   8  -5   0    4.54    5.96
  -5  -8   0   16.25    2.88
   5   8   0   10.19    7.02
  -6  -8   0 1779.06   50.80
   6   8   0 1622.98   52.32
   8  -6   0 1801.63   52.24
  -8   6   0 1835.56   52.49
  -6  -8   0 1797.50   40.40
   8  -7   0   34.53    9.09
  -8   7   0   29.82    8.39
  -7  -8   0   29.93    3.92
   7   8   0   26.99    8.84
  -7  -8   0   28.09    7.29
  -8   8   0 2267.96   64.97
   8  -8   0 2305.93   65.01
  -8  -8   0 2301.89   52.83
  -8  -8   0 2314.68   63.52
   8   8   0 2287.78   66.55
   8  -9   0    6.54    7.13
   9   8   0    1.97    6.37
  -8   9   0    0.24    5.38
  -9  -8   0   10.03    6.31
  -7   9   0  597.85   27.22
  -9  -7   0  645.02   26.47
   9   7   0  636.45   28.47
   7  -9   0  662.96   27.47
  -9  -6   0   -2.30    4.17
   9   6   0   10.44    6.59
  -6   9   0    5.20    6.09
   6  -9   0    8.45    4.06
   6  -9   0   -0.71    5.16
   9   5   0    5.53    6.46
   5  -9   0    5.40    3.76
   5  -9   0   16.59    6.89
  -5   9   0   -1.70    5.66
   9   5   0    6.22    3.72
  -4   9   0   44.51    9.79
   4  -9   0   53.77    7.66
   4  -9   0   54.92    8.99
   9   4   0   62.40    7.85
   9   4   0   61.15   10.43
  -3   9   0  695.19   28.25
   9   3   0  722.82   23.76
   9   3   0  684.88   27.27
   3  -9   0  736.32   24.35
   3  -9   0  713.11   25.48
   9   2   0   42.26    9.21
   2  -9   0   53.50    7.83
   9   2   0   57.50    8.02
   2  -9   0   50.88    8.24
  -2   9   0   51.21   10.24
   1  -9   0 1079.56   33.03
   9   1   0 1111.03   36.27
   9   1   0 1070.98   33.10
   1  -9   0 1030.37   31.06
  -1   9   0 1079.17   36.88
   0   9   0  113.85   12.94
   9   0   0  111.98   12.41
   9   0   0  145.66   12.91
   0  -9   0  155.47   11.78
   0  -9   0  139.35    9.81
   1   9   0  904.37   33.35
   9  -1   0  936.95   33.30
   9  -1   0  949.74   31.77
  -1  -9   0  990.36   30.92
  -1  -9   0  911.63   26.30
   2   9   0   -0.73    6.01
  -9   2   0   -0.67    5.56
  -2  -9   0    4.57    4.81
   2   9   0    2.06    3.17
   9  -2   0   -0.58    4.85
  -2  -9   0   -1.03    3.37
  -9   3   0  377.54   20.40
   9  -3   0  427.38   20.80
  -3  -9   0  389.46   13.08
   3   9   0  398.49   21.88
  -3  -9   0  412.58   19.26
   9  -4   0   22.83    8.22
   4   9   0   12.36    7.76
  -4  -9   0   11.59    3.24
  -9   4   0   11.66    6.81
  -4  -9   0    5.61    5.87
   5   9   0  524.20   25.37
   9  -5   0  599.94   25.71
  -5  -9   0  580.45   15.35
  -5  -9   0  530.98   23.22
  -9   5   0  591.05   25.52
  -6  -9   0   43.68    4.05
  -6  -9   0   37.16    8.83
   6   9   0   38.05    9.30
  -6  -9   0   41.20    3.75
  -9   6   0   29.19    8.45
   9  -6   0   20.89    7.67
  -7  -9   0 1154.14   27.81
   9  -7   0 1170.82   40.25
   7   9   0 1175.03   42.09
  -7  -9   0 1141.54   39.03
  -9   7   0 1193.59   40.74
  -8  -9   0   -0.57    2.34
   8   9   0    5.36    7.32
  -9   8   0    4.08    6.34
   9  -8   0   10.22    7.21
  -8  -9   0   -4.65    5.13
  -9  -9   0  853.06   27.28
  -9   9   0  886.27   34.82
   9  -9   0  881.14   34.98
  -9  -9   0  823.79   32.70
   9   9   0  839.30   35.96
  10   9   0   15.75    9.44
  -9  10   0   -0.33    6.14
   9 -10   0    0.17    7.04
 -10  -9   0    3.62    6.86
  -8  10   0   17.57    7.31
  10   8   0   23.36    8.39
   8 -10   0   18.01    7.87
 -10  -8   0   18.64    7.50
  -7  10   0   10.84    6.52
  10   7   0    2.69    6.54
 -10  -7   0   -2.55    5.41
   7 -10   0   -0.82    6.20
  -6  10   0 1851.15   56.70
   6 -10   0 1895.87   55.22
 -10  -6   0 1917.15   54.10
  10   6   0 1829.46   56.70
   6 -10   0 1863.39   50.51
   5 -10   0   42.90    8.89
  10   5   0   27.95    5.85
  -5  10   0   34.82    9.01
   5 -10   0   26.79    5.87
  10   5   0   36.62    9.82
  10   4   0  337.52   19.44
   4 -10   0  331.00   17.66
  -4  10   0  341.17   19.87
   4 -10   0  363.88   16.21
  10   4   0  339.54   15.41
   3 -10   0   -2.86    3.54
  10   3   0   -4.80    4.54
  -3  10   0   -3.30    5.50
   3 -10   0    3.79    5.31
  10   3   0   10.16    5.17
  10   2   0  608.16   22.87
  10   2   0  602.87   26.01
   2 -10   0  617.58   22.82
   2 -10   0  605.82   22.88
  -2  10   0  608.89   26.70
  10   1   0   27.40    7.07
   1 -10   0   29.03    6.45
  10   1   0   36.03    8.67
  -1  10   0   29.84    8.73
   1 -10   0   39.92    7.46
   0 -10   0   91.10   10.32
  10   0   0   81.20   11.99
  10   0   0   89.15   10.32
   0  10   0   94.35   12.89
   0 -10   0   87.60    8.51
  10  -1   0   16.85    7.15
  -1 -10   0   23.79    5.31
   1  10   0   26.72    8.61
  -1 -10   0   30.23    7.04
  10  -1   0   32.86    8.28
   2  10   0  610.98   17.00
 -10   2   0  581.77   26.54
  10  -2   0  633.34   25.96
  -2 -10   0  627.96   19.34
   2  10   0  611.55   27.09
  -2 -10   0  614.02   24.66
   3  10   0    9.07    7.65
  10  -3   0   32.76    8.45
  -3 -10   0   16.27    4.09
  -3 -10   0   25.21    6.99
 -10   3   0   24.63    7.95
 -10   4   0  119.61   13.95
   4  10   0  100.79   12.98
  -4 -10   0  155.97    7.43
  10  -4   0  143.30   14.39
  -4 -10   0  153.19   14.18
  -5 -10   0   22.09    7.62
 -10   5   0   10.35    6.93
  -5 -10   0   20.05    3.32
  10  -5   0   15.74    7.36
   5  10   0    4.69    6.93
  10  -6   0  971.21   36.19
  -6 -10   0  951.33   23.32
  -6 -10   0  926.52   34.32
 -10   6   0 1005.54   36.22
   6  10   0  981.80   37.59
  -6 -10   0  924.37   23.05
  -7 -10   0   18.89    2.77
 -10   7   0    1.10    5.57
  -7 -10   0   10.28    7.01
  10  -7   0   19.45    8.90
   7  10   0   20.95    9.24
  -7 -10   0   21.26    2.95
  -8 -10   0  614.47   27.59
 -10   8   0  644.08   29.49
  -8 -10   0  648.89   16.43
  -8 -10   0  616.68   16.43
  10  -8   0  653.34   29.34
   8  10   0  635.08   30.64
   9  10   0   22.01    9.64
  -9 -10   0   24.10    3.62
  10  -9   0   50.62   11.84
 -10   9   0   31.93    9.75
  -9 -10   0    8.36    6.93
  10 -10   0  158.62   17.82
 -10 -10   0  146.19   16.06
  10  10   0  193.43   21.30
 -10 -10   0  134.89    9.99
 -10  10   0  142.12   16.42
  11  10   0    1.46    8.11
 -10  11   0    3.65    7.31
  10 -11   0    2.17    7.63
 -11 -10   0    3.60    3.27
 -11 -10   0   -5.40    6.12
 -11  -9   0  199.07   18.27
  11   9   0  173.99   19.76
  -9  11   0  199.28   20.22
   9 -11   0  169.54   18.97
  -8  11   0    7.73    6.76
  11   8   0   -3.15    5.75
 -11  -8   0    1.36    5.66
   8 -11   0    5.31    6.55
 -11  -7   0  181.19   14.82
   7 -11   0  169.75   17.10
   7 -11   0  158.74   12.02
  -7  11   0  210.98   19.93
  11   7   0  176.06   18.45
  11   6   0   69.45   12.16
   6 -11   0   47.45    7.76
 -11  -6   0   61.21    9.97
   6 -11   0   49.12    9.96
  -6  11   0   46.56    9.86
  11   5   0 1224.52   36.44
   5 -11   0 1224.31   40.85
  -5  11   0 1294.56   43.88
   5 -11   0 1281.41   38.12
  11   5   0 1268.87   43.72
  11   4   0   21.49    8.06
   4 -11   0   38.63    7.87
  -4  11   0   38.64   10.07
   4 -11   0   24.47    6.37
  11   4   0   38.07    7.12
  11   3   0  343.39   16.67
   3 -11   0  346.07   16.91
  11   3   0  343.88   20.57
   3 -11   0  338.98   17.69
  -3  11   0  318.27   20.32
   2 -11   0   26.70    6.47
  11   2   0   12.82    7.33
  -2  11   0    9.60    6.52
  11   2   0   23.21    6.42
   2 -11   0   23.59    6.54
  11   1   0  193.10   17.62
   1 -11   0  181.57   11.86
  -1  11   0  181.82   17.55
   1 -11   0  154.73   12.19
  11   1   0  153.14   12.48
   0 -11   0   15.50    5.97
   0  11   0   10.57    6.94
   0 -11   0   12.54    5.12
  11   0   0   -0.77    5.45
  11   0   0    5.19    5.64
  11  -1   0  488.91   24.35
   1  11   0  502.69   25.53
  -1 -11   0  505.23   18.17
  -1 -11   0  501.80   22.33
  11  -1   0  550.79   23.68
   2  11   0   16.72    7.85
  -2 -11   0    8.63    5.31
   2  11   0    4.57    3.31
 -11   2   0   -3.69    5.63
  -2 -11   0    7.28    3.46
  11  -2   0   -2.49    5.43
 -11   3   0 1498.73   49.02
  -3 -11   0 1419.03   37.39
  11  -3   0 1555.95   47.84
   3  11   0 1498.79   50.13
  -3 -11   0 1554.88   46.54
 -11   4   0   24.93    8.01
  -4 -11   0   10.07    3.37
  -4 -11   0   11.15    5.99
  11  -4   0   18.44    8.48
   4  11   0   20.42    8.31
  -5 -11   0    6.59    6.14
  11  -5   0   18.60    8.04
   5  11   0   45.38   11.02
  -5 -11   0   17.38    3.43
 -11   5   0   16.62    7.45
  11  -6   0    3.25    6.79
   6  11   0   -6.42    5.96
 -11   6   0   -0.65    5.76
  -6 -11   0    0.44    2.18
  -6 -11   0    4.09    5.63
  11  -7   0   14.52    8.27
   7  11   0    8.78    7.02
  -7 -11   0    5.62    6.03
 -11   7   0   -1.34    6.29
  -8 -11   0   15.48    7.47
 -11   8   0   -1.82    6.29
   8  11   0   -5.96    7.48
  11  -8   0    0.68    6.65
  -9 -11   0  892.43   36.84
 -11   9   0  917.82   38.26
   9  11   0  966.02   40.44
  11  -9   0  999.08   39.83
 -11  10   0    4.10    7.74
 -10 -11   0    6.85    8.00
  10  11   0   -1.14    8.00
  11 -10   0   -8.53    7.64
 -11 -11   0   48.57   11.83
  11  11   0   59.27   13.88
 -11  11   0   44.35   11.79
  11 -11   0   58.33   12.46
  12  11   0   -2.83    7.57
  11 -12   0   26.16   11.17
 -11  12   0    4.29    7.88
 -12 -11   0    8.36    8.81
 -10  12   0  301.16   22.42
  10 -12   0  281.77   21.61
  12  10   0  297.60   23.65
 -12 -10   0  302.78   21.47
  -9  12   0    4.77    7.97
 -12  -9   0    7.46    7.17
  12   9   0   -1.98    7.81
   9 -12   0    1.00    7.21
  12   8   0    9.65    8.68
   8 -12   0    5.46    7.50
 -12  -8   0   -4.10    6.19
  -8  12   0    1.45    7.23
   7 -12   0    4.83    6.75
   7 -12   0    1.70    4.45
 -12  -7   0    9.48    6.55
  -7  12   0    6.40    7.16
  12   7   0   -0.20    6.90
   6 -12   0  999.22   38.11
  -6  12   0 1053.00   40.75
 -12  -6   0 1084.78   37.90
  12   6   0 1070.76   41.40
   6 -12   0 1134.69   35.53
  -5  12   0    8.97    8.77
   5 -12   0   14.99    5.49
   5 -12   0   17.44    7.83
  12   5   0   19.34    8.43
  12   5   0   22.10    6.42
  12   4   0  545.61   26.90
  12   4   0  514.32   21.51
   4 -12   0  564.74   24.32
  -4  12   0  549.17   27.46
   4 -12   0  521.32   22.25
  12   3   0    4.35    4.61
   3 -12   0    3.43    5.55
  12   3   0    6.82    6.75
  -3  12   0    3.04    6.56
   3 -12   0    4.31    4.63
  -2  12   0   24.13    9.08
  12   2   0   35.34    8.01
   2 -12   0   32.52    7.41
  12   2   0   40.06    9.64
   2 -12   0   32.31    7.64
  12   1   0   49.71    9.08
   1 -12   0   44.13    8.32
  -1  12   0   56.87   11.41
  12   1   0   65.54   11.20
   1 -12   0   61.49    8.49
   0 -12   0  142.34   10.78
  12   0   0  168.66   15.42
   0  12   0  145.52   16.38
  12   0   0  165.79   17.50
   0 -12   0  149.48   14.05
  -1 -12   0    8.73    4.48
  -1 -12   0    8.14    5.39
   1  12   0   -6.67    5.31
  12  -1   0   -2.91    5.55
  12  -1   0    7.91    6.84
  -2 -12   0 1875.27   54.37
   2  12   0 1831.72   43.68
 -12   2   0 1792.51   57.39
   2  12   0 1911.38   59.19
  -2 -12   0 1801.14   46.56
  12  -2   0 1881.46   55.73
  -3 -12   0    6.20    6.30
 -12   3   0    7.50    6.73
   3  12   0   15.16    8.90
   3  12   0   10.15    2.91
  12  -3   0   14.92    7.12
  -4 -12   0  798.71   22.80
  -4 -12   0  828.85   32.25
  12  -4   0  826.60   33.98
   4  12   0  845.70   35.85
 -12   4   0  835.95   34.52
  -5 -12   0   -1.63    2.43
 -12   5   0   -3.70    5.44
  -5 -12   0    0.51    4.99
   5  12   0    1.35    6.97
  12  -5   0   14.29    7.75
   6  12   0   17.39    8.77
  12  -6   0   37.46    9.70
 -12   6   0   10.07    7.71
  -6 -12   0   25.20    8.52
  -6 -12   0   26.01    3.51
  12  -7   0   -2.08    6.94
   7  12   0    7.69    7.63
  -7 -12   0    3.46    6.11
 -12   7   0  -11.46    5.69
 -12   8   0    8.95    8.55
  -8 -12   0    0.28    6.67
   8  12   0   -3.63    7.54
  12  -8   0   -6.54    6.23
   9  12   0    9.41    8.35
 -12   9   0    4.78    8.48
  12  -9   0    1.21    8.24
  -9 -12   0    6.86    7.84
  10  12   0  434.78   28.77
 -10 -12   0  417.25   25.57
 -12  10   0  424.43   26.26
  12 -10   0  424.79   27.32
  11  12   0    9.23    8.26
 -11 -12   0   -3.49    7.39
  12 -11   0   12.04    9.72
 -12  11   0    8.02    7.97
 -12 -12   0  203.13   21.85
  12  12   0  181.20   21.99
  12 -12   0  211.59   23.23
 -12  12   0  195.76   22.60
  12 -13   0   -4.39    7.69
 -13 -12   0   -7.58    7.03
 -12  13   0   15.89    9.22
  13  12   0    2.50    9.06
 -11  13   0   27.30   10.54
 -13 -11   0   48.02   12.27
  11 -13   0   46.17   13.13
  13  11   0   22.14   10.57
 -10  13   0   26.10   10.82
  13  10   0    5.19    9.15
 -13 -10   0    6.55    8.26
  10 -13   0   -2.46    8.56
   9 -13   0  152.01   18.32
  13   9   0  156.24   20.17
 -13  -9   0  162.15   18.25
  -9  13   0  115.98   16.57
  13   8   0   20.94    9.69
  -8  13   0   14.08    8.61
   8 -13   0   15.21    9.28
 -13  -8   0   18.66    9.31
  -7  13   0  407.46   25.64
  13   7   0  454.93   27.16
   7 -13   0  477.61   25.42
   7 -13   0  454.50   21.33
 -13  -7   0  451.85   24.39
 -13  -6   0   -1.57    5.94
   6 -13   0   -3.84    6.20
  13   6   0  -11.05    5.81
  -6  13   0    1.95    7.20
   6 -13   0   -1.48    3.98
   5 -13   0  729.09   28.02
  13   5   0  719.36   33.28
  -5  13   0  726.97   33.72
   5 -13   0  758.46   30.85
  13   5   0  711.46   26.82
 -13  -5   0  781.25   30.20
  13   4   0   -3.98    6.78
  -4  13   0   -0.83    7.24
  13   4   0   -5.07    4.23
   4 -13   0   -2.18    4.26
   4 -13   0   -3.46    5.61
  -3  13   0  191.60   19.48
   3 -13   0  186.17   14.14
  13   3   0  159.10   17.34
  13   3   0  192.49   14.13
   3 -13   0  184.14   13.97
  13   2   0   39.76    8.65
  -2  13   0   36.91   10.62
   2 -13   0   31.80    7.85
   2 -13   0   41.50    8.54
  13   2   0   27.38    9.33
   1 -13   0  116.14   11.82
  13   1   0  126.89   13.88
  13   1   0  133.26   16.58
   1 -13   0  128.19   13.96
  -1  13   0  138.50   17.33
   0 -13   0   10.00    5.99
   0 -13   0   -1.42    3.96
   0  13   0   -6.15    6.87
  13   0   0   10.63    6.46
  13   0   0    8.55    7.52
   1  13   0   34.66    5.73
  13  -1   0   20.19    8.85
  -1 -13   0   24.05    5.85
  -1 -13   0   26.74    7.68
  13  -1   0   23.89    8.65
   1  13   0   30.16   10.00
  13  -2   0   13.14    8.21
   2  13   0   25.50    4.46
   2  13   0   15.34    9.41
  -2 -13   0   20.70    7.08
  -2 -13   0   25.69    5.49
 -13   2   0   11.68    7.48
  -3 -13   0 2445.26   67.89
   3  13   0 2332.86   72.14
 -13   3   0 2341.11   70.82
  -3 -13   0 2378.13   57.36
  13  -3   0 2417.55   69.20
   3  13   0 2287.42   52.33
 -13   4   0   13.78    7.93
  13  -4   0   33.92    9.30
  -4 -13   0   10.07    7.02
   4  13   0   -2.07    7.67
 -13   5   0  772.33   33.93
  13  -5   0  704.56   33.11
  -5 -13   0  717.62   20.44
  -5 -13   0  694.85   31.03
   5  13   0  784.42   36.24
  -6 -13   0    2.51    6.31
  13  -6   0    9.95    8.30
   6  13   0    0.10    7.65
  -6 -13   0   -0.05    2.34
 -13   6   0   -4.26    6.74
   7  13   0  957.17   41.46
  13  -7   0  963.03   39.76
  -7 -13   0  893.70   37.39
 -13   7   0  932.45   39.22
  -8 -13   0   17.82    8.85
   8  13   0   17.55   10.87
  13  -8   0   -0.92    7.54
 -13   8   0   -3.61    7.15
 -13   9   0    3.06    8.27
   9  13   0   17.27   10.20
  -9 -13   0   25.78    9.55
  13  -9   0    2.16    8.99
 -10 -13   0    7.60    8.29
  13 -10   0   -3.95    8.02
 -13  10   0  -13.06    6.32
  10  13   0   14.48   10.56
  13 -11   0  778.72   38.74
 -11 -13   0  833.18   37.79
 -13  11   0  780.92   37.73
  11  13   0  811.90   41.08
 -13  12   0    4.76    8.82
 -12 -13   0    6.94    8.56
  13 -12   0    4.27    8.84
  12  13   0   15.61   12.03
 -13 -13   0  176.61   20.71
  13 -13   0  273.38   27.45
 -13  13   0  212.48   24.40
  13  13   0  246.78   27.25
 -14 -13   0    0.10    7.92
 -13  14   0   18.58    9.88
  14  13   0   -0.26    8.71
  13 -14   0  -19.69    8.50
  14  12   0   69.26   16.81
 -12  14   0   97.47   16.97
  12 -14   0   87.00   16.32
 -14 -12   0   82.99   15.48
 -11  14   0   17.31   10.68
  11 -14   0   10.11    9.95
 -14 -11   0   12.78    9.65
  14  11   0   -3.03    9.64
  14  10   0  552.53   33.59
 -10  14   0  619.92   33.77
  10 -14   0  549.24   30.81
 -14 -10   0  551.89   30.30
 -14  -9   0   -3.62    6.73
  -9  14   0   -9.07    7.18
  14   9   0   -6.21    8.39
   9 -14   0  -12.72    7.21
  -8  14   0  272.75   22.57
  14   8   0  206.56   22.03
   8 -14   0  272.06   17.45
   8 -14   0  264.49   21.29
 -14  -8   0  286.95   21.24
   7 -14   0    5.52    5.34
   7 -14   0    0.92    7.09
 -14  -7   0    1.59    7.40
  14   7   0   -2.97    7.53
  -7  14   0   -9.41    6.94
  14   6   0   83.27   14.19
  -6  14   0   77.68   14.12
   6 -14   0  110.62   12.71
 -14  -6   0  105.36   13.38
   6 -14   0   92.25   13.78
   5 -14   0    3.84    6.44
  -5  14   0    4.42    8.74
   5 -14   0   -1.41    4.61
 -14  -5   0   -0.47    5.71
  14   5   0    4.07    5.29
  14   5   0    5.17    8.33
  14   4   0  399.71   25.27
   4 -14   0  386.42   20.40
   4 -14   0  395.92   21.59
  14   4   0  392.48   20.10
  -4  14   0  450.99   26.82
  14   3   0   12.09    8.29
   3 -14   0    9.09    6.47
  -3  14   0    2.51    7.89
   3 -14   0    3.83    5.35
  14   3   0    1.95    5.26
   2 -14   0  441.04   21.07
  14   2   0  435.94   25.63
  -2  14   0  456.59   27.29
   2 -14   0  411.27   21.86
  14   2   0  442.31   22.05
  14   1   0   15.01    6.99
  -1  14   0   14.24    8.74
  14   1   0   23.85    8.88
   0 -14   0  119.00   11.70
  14   0   0  108.41   14.08
   0  14   0  127.51   17.76
  14   0   0  127.53   16.41
   0 -14   0  127.98   14.68
   1  14   0    7.24    8.38
  -1 -14   0   -0.12    5.42
  14  -1   0   -4.64    5.69
  14  -1   0    5.59    7.57
   1  14   0    4.00    4.41
  -1 -14   0   -0.93    4.39
  -2 -14   0  538.69   19.77
  -2 -14   0  486.97   25.12
   2  14   0  511.98   29.77
   2  14   0  515.30   16.57
 -14   2   0  480.35   27.90
  14  -2   0  503.98   26.47
   3  14   0   10.55    9.36
 -14   3   0    3.60    7.91
  -3 -14   0   15.89    7.75
  14  -3   0   14.74    8.62
  -3 -14   0   17.98    5.11
  14  -4   0  998.07   40.40
   4  14   0 1029.52   43.15
  -4 -14   0  997.45   28.21
 -14   4   0 1029.11   41.87
  -4 -14   0 1022.82   39.19
  14  -5   0    2.06    8.27
   5  14   0    2.28    9.42
 -14   5   0   -7.27    5.94
  -5 -14   0    3.39    3.42
  -5 -14   0   -3.81    6.75
 -14   6   0   79.90   13.98
  -6 -14   0   94.80    5.97
  14  -6   0   95.64   15.45
   6  14   0   94.94   16.86
  -6 -14   0  107.35   15.95
  14  -7   0   17.66    9.54
   7  14   0    4.45    9.07
 -14   7   0    9.45    8.54
  -7 -14   0    9.23    8.16
  -8 -14   0   21.65    9.41
   8  14   0   39.06   13.57
  14  -8   0   32.59   11.64
 -14   8   0   20.90   10.13
   9  14   0    9.36   11.31
  14  -9   0    9.83   10.19
  -9 -14   0   -6.47    7.11
 -14   9   0   -7.74    7.44
  14 -10   0  468.38   30.38
 -10 -14   0  421.01   26.72
  10  14   0  471.87   31.20
 -14  10   0  469.36   29.13
  11  14   0   -3.15   10.13
  14 -11   0   -5.34    9.72
 -11 -14   0    3.81    8.26
 -14  11   0   -2.89    8.52
 -12 -14   0  349.64   25.12
  12  14   0  282.71   30.45
  14 -12   0  375.24   28.93
 -14  12   0  346.65   27.09
  13  14   0    4.54    9.96
 -14  13   0   -1.02    7.63
 -13 -14   0    0.07    9.05
  14 -13   0    7.86   10.19
 -14 -14   0   -1.46    8.43
  14 -14   0   33.34   13.38
  14  14   0   18.45   12.81
 -14  14   0   18.98   10.91
 -14  15   0   28.69   12.14
  14 -15   0   15.54   11.65
 -15 -14   0   -2.57    8.75
  15  14   0   17.56   11.44
  15  13   0   -2.39   10.57
 -15 -13   0    5.25    9.10
  13 -15   0    9.28   12.09
 -13  15   0   16.39   11.39
 -15 -12   0    4.63    9.02
  15  12   0  -12.71    9.09
 -12  15   0    7.95   10.12
  12 -15   0    0.35    8.32
  15  11   0  409.67   30.33
 -15 -11   0  328.02   25.11
 -11  15   0  323.69   26.21
  11 -15   0  341.38   26.70
 -10  15   0    9.81   10.13
  10 -15   0    1.09    9.04
 -15 -10   0   -2.04    7.87
  15  10   0    5.86    9.46
  -9  15   0  331.03   25.66
  15   9   0  363.38   27.65
 -15  -9   0  403.09   25.29
   9 -15   0  349.62   25.40
  -8  15   0   -6.32    7.97
  15   8   0   -3.32    8.30
   8 -15   0   -6.95    4.35
 -15  -8   0    8.76    8.04
   8 -15   0    3.80    8.33
   7 -15   0  246.85   20.16
  -7  15   0  233.52   23.82
 -15  -7   0  293.91   20.88
  15   7   0  308.71   24.67
   7 -15   0  280.38   18.20
 -15  -6   0   -4.16    6.38
   6 -15   0    1.22    7.12
   6 -15   0    5.68    5.62
  -6  15   0  -13.16    6.42
  15   6   0   -5.21    7.78
  15   5   0   24.77    8.03
   5 -15   0   14.13    8.10
 -15  -5   0   17.76    7.81
   5 -15   0   22.79    7.49
  -5  15   0    8.88    9.44
  15   5   0    8.16    9.19
   4 -15   0   -6.13    5.91
   4 -15   0   -0.61    5.04
  15   4   0   11.78    6.43
  -4  15   0   -3.02    6.46
  15   4   0   -5.79    7.29
  15   3   0  118.58   18.10
  -3  15   0   85.00   14.99
  15   3   0   72.13   11.70
   3 -15   0   82.48   12.07
   3 -15   0   86.76   12.36
   2 -15   0   15.75    6.95
  15   2   0   13.41    7.66
  -2  15   0   10.43    8.22
   2 -15   0    8.29    6.65
  15   2   0    6.20    8.18
  -1  15   0 1159.72   47.60
   1 -15   0 1282.70   43.43
   1 -15   0 1164.17   38.73
  15   1   0 1230.08   43.05
  15   1   0 1251.28   47.34
   0 -15   0   22.50    7.01
   0  15   0    0.54    8.87
  15   0   0   35.11   10.86
  15   0   0   45.76   10.35
   0 -15   0   21.79    8.33
  -1 -15   0  193.96   18.51
  15  -1   0  184.18   18.19
  15  -1   0  243.08   23.98
   1  15   0  225.55   23.07
   1  15   0  205.06   11.68
  -1 -15   0  185.12   12.91
   2  15   0    1.17    3.75
  15  -2   0   -2.08    7.03
  -2 -15   0    5.22    4.88
 -15   2   0   -3.28    7.11
   2  15   0   -1.63    8.07
  -2 -15   0   -1.34    6.15
  -3 -15   0    5.31    6.64
 -15   3   0   17.66    8.90
  15  -3   0   19.88    9.80
  -3 -15   0   17.00    5.30
   3  15   0   20.41   11.30
   4  15   0    2.91    7.69
  -4 -15   0    0.80    3.76
  15  -4   0   16.92    8.53
 -15   4   0   -2.81    6.60
  -4 -15   0   -1.47    6.46
  15  -5   0  444.88   26.81
   5  15   0  465.02   30.14
  -5 -15   0  429.79   15.06
  -5 -15   0  396.48   24.87
 -15   5   0  479.36   28.26
   6  15   0   -0.36    7.83
  15  -6   0   -7.49    8.22
  -6 -15   0    2.61    4.15
  -6 -15   0   -0.35    7.26
 -15   6   0    0.98    8.52
   7  15   0   58.84   14.76
  15  -7   0   64.50   14.05
  -7 -15   0   75.74   14.30
 -15   7   0   51.37   12.76
  -8 -15   0   12.74    8.89
   8  15   0    0.84   10.96
  15  -8   0    2.00    8.18
 -15   8   0   -0.82    8.28
  15  -9   0   42.00   13.59
  -9 -15   0   45.32   12.32
   9  15   0   19.18   12.55
 -15   9   0   32.62   12.02
 -15  10   0   -0.98    8.81
  10  15   0    9.54   11.41
  15 -10   0    4.03    9.24
 -10 -15   0   15.79    9.84
 -15  11   0  409.17   28.64
 -11 -15   0  371.09   27.04
  11  15   0  454.76   32.36
  15 -11   0  363.93   27.70
  12  15   0  -10.93    8.74
  15 -12   0   -3.33    9.12
 -15  12   0    6.07    9.41
 -12 -15   0    3.07    8.69
 -13 -15   0  407.99   28.65
  13  15   0  487.83   34.39
 -15  13   0  456.07   30.91
  15 -13   0  443.81   31.86
  14  15   0   10.14   10.91
  15 -14   0  -18.86    8.53
 -15  14   0    6.19    9.46
 -14 -15   0    6.27   10.04
 -15  15   0   63.33   15.50
 -15 -15   0   81.71   17.35
  15 -15   0   67.24   17.22
  15  15   0   52.18   16.99
  16  15   0    6.89   12.75
  15 -16   0    0.41   10.90
 -16 -15   0    5.31    9.85
 -15  16   0    0.72    8.51
 -14  16   0   42.01   14.89
  14 -16   0   43.83   14.62
  16  14   0   36.70   15.04
 -16 -14   0   23.60   11.95
  13 -16   0    8.09   12.14
 -16 -13   0   22.04   10.35
  16  13   0    1.37   10.62
 -13  16   0   18.53   11.51
 -16 -12   0   46.44   13.60
  16  12   0   21.65   13.56
 -12  16   0   48.52   14.45
  12 -16   0   51.42   14.89
  16  11   0   -1.97   10.28
  11 -16   0   -3.73    7.28
 -16 -11   0    6.95    8.73
 -11  16   0    3.77    9.70
  10 -16   0  708.24   37.03
 -10  16   0  755.57   39.08
  16  10   0  723.91   39.72
 -16 -10   0  708.37   36.10
  -9  16   0  -10.02    8.34
   9 -16   0   -0.68    8.57
  16   9   0   -7.14    7.94
 -16  -9   0   14.43    9.06
   8 -16   0  264.53   18.50
  -8  16   0  285.22   28.18
   8 -16   0  243.79   24.23
 -16  -8   0  268.98   24.12
  16   8   0  225.92   25.45
   7 -16   0    1.09    5.69
 -16  -7   0   -2.37    7.23
   7 -16   0   -3.54    7.42
  16   7   0    1.63    9.63
  -7  16   0   -0.85    8.81
 -16  -6   0    2.00    6.86
   6 -16   0   11.66    7.06
   6 -16   0   24.76    9.85
  16   6   0    4.69    8.71
  -6  16   0   24.82   12.15
   5 -16   0   11.29    7.40
  -5  16   0    5.79    9.16
   5 -16   0    2.21    5.73
  16   5   0   -0.34    5.94
 -16  -5   0   -5.02    5.60
  16   5   0    3.88    7.92
   4 -16   0   -2.54    6.27
  16   4   0   11.59    9.73
  16   4   0   28.39    8.17
  -4  16   0   14.32   10.17
   4 -16   0   18.38    7.26
 -16  -4   0    5.82    6.87
   3 -16   0   10.87    6.69
  -3  16   0   -9.45    7.50
  16   3   0   -1.79    7.77
   3 -16   0   -3.73    4.86
  16   3   0    8.46    6.60
   2 -16   0  216.71   17.34
  16   2   0  130.49   18.54
  16   2   0  176.49   17.73
   2 -16   0  194.72   17.65
  -2  16   0  174.34   21.30
   1 -16   0   11.11    6.98
  16   1   0   10.92    7.46
   1 -16   0   16.62    6.83
  16   1   0    4.62    7.51
  -1  16   0    6.74    8.66
   0  16   0  291.08   23.51
   0  16   0  287.86   15.22
  16   0   0  312.79   21.34
   0 -16   0  290.10   20.51
  16   0   0  259.86   25.24
   0 -16   0  307.14   17.35
  -1 -16   0    3.37    7.26
  16  -1   0    8.45    8.04
   1  16   0    5.15    9.20
  16  -1   0    6.68    8.29
   1  16   0    4.08    5.38
  -1 -16   0    5.89    5.63
   2  16   0    6.03   10.68
  16  -2   0   37.71   10.95
 -16   2   0    2.45    8.42
   2  16   0   14.77    6.28
  -2 -16   0    8.56    5.74
  -2 -16   0    8.79    7.61
 -16   3   0    1.70    8.01
  16  -3   0    8.51    8.98
   3  16   0    2.24    9.20
  -3 -16   0    2.30    4.62
  -3 -16   0    2.21    6.98
  -4 -16   0  229.70   11.80
 -16   4   0  235.98   23.96
  16  -4   0  206.91   21.81
  -4 -16   0  222.73   21.69
   4  16   0  223.07   24.69
  16  -5   0    7.76    8.34
   5  16   0   -8.65    7.75
  -5 -16   0   -8.96    4.08
 -16   5   0    8.13    8.36
  -5 -16   0   -1.30    7.55
 -16   6   0  379.20   26.83
   6  16   0  380.04   27.67
  16  -6   0  324.23   25.62
  -6 -16   0  342.27   24.48
  16  -7   0    3.54    9.05
   7  16   0    7.29    9.56
 -16   7   0   -0.08    8.27
  -7 -16   0   14.52    8.85
   8  16   0  516.28   33.42
 -16   8   0  553.95   32.45
  -8 -16   0  579.06   32.47
  16  -8   0  570.88   33.06
 -16   9   0  -11.49    7.96
  16  -9   0  -12.35    8.98
   9  16   0  -16.83    9.35
  -9 -16   0   -9.42    7.76
  10  16   0   74.79   18.16
 -10 -16   0   98.32   16.93
  16 -10   0   98.93   17.58
 -16  10   0  109.11   18.14
  16 -11   0   -4.47    8.36
  11  16   0    6.57    9.06
 -16  11   0   10.72   10.36
 -11 -16   0   -6.68    7.77
  16 -12   0   93.93   17.71
 -16  12   0  117.65   19.29
 -12 -16   0  117.17   18.35
  12  16   0  129.62   22.37
  16 -13   0   -2.60   11.26
 -13 -16   0   11.13    9.47
  13  16   0    0.19    9.55
 -16  13   0   -5.93    8.26
 -16  14   0  141.93   21.12
 -14 -16   0   83.53   16.61
  14  16   0  111.12   21.99
  16 -14   0   89.99   18.37
 -16  15   0   -0.75    9.15
 -15 -16   0   12.29    9.56
  16 -15   0   14.15   12.31
  15  16   0    2.29   11.67
 -16 -16   0   87.27   17.46
  16  16   0   63.72   19.50
 -16  16   0  104.82   20.18
  16 -16   0   99.56   21.31
  16 -17   0   -3.02   11.71
 -16  17   0    1.55   10.72
  17  16   0   -6.38   11.54
 -17 -16   0    2.46   10.08
 -15  17   0   51.54   15.72
  15 -17   0   65.69   18.17
 -17 -15   0   50.76   14.95
  17  15   0   41.95   16.25
  17  14   0   14.96   12.51
  14 -17   0    1.79   11.06
 -14  17   0    8.88   10.73
 -17 -14   0    7.41   10.13
 -17 -13   0  127.39   20.10
  13 -17   0  119.07   20.52
  17  13   0  118.88   21.49
 -13  17   0  105.65   19.46
  17  12   0   -0.99   10.05
  12 -17   0    8.20   11.07
 -17 -12   0    1.74    8.72
 -12  17   0   -3.74    8.69
 -17 -11   0  221.80   24.05
  11 -17   0  254.72   26.94
 -11  17   0  208.55   25.26
  17  11   0  206.62   25.84
  17  10   0   -1.39    9.32
 -17 -10   0    9.99    9.86
  10 -17   0   15.08   10.11
 -10  17   0    0.58    9.70
   9 -17   0  353.46   26.17
 -17  -9   0  333.86   24.93
  17   9   0  348.27   29.11
  -9  17   0  342.09   27.77
   8 -17   0   -0.77    5.90
  -8  17   0   -0.25    8.87
  17   8   0  -14.86    9.31
   8 -17   0   -6.32    7.83
 -17  -8   0    1.90    8.05
  -7  17   0    0.75   10.24
   7 -17   0    0.39    8.42
   7 -17   0    0.12    5.65
  17   7   0   17.12   12.13
 -17  -7   0    4.80    8.05
   6 -17   0   10.64    8.84
  17   6   0    1.98    9.29
  -6  17   0    4.31    9.60
 -17  -6   0    7.18    8.22
   6 -17   0   11.16    7.07
  -5  17   0   11.78   10.93
   5 -17   0   23.94    7.91
 -17  -5   0    4.16    6.85
   5 -17   0   18.52    8.62
  17   5   0   36.06   12.87
  17   5   0   24.08    8.87
 -17  -4   0   10.95    7.44
   4 -17   0    9.32    6.44
   4 -17   0   15.34    7.85
  17   4   0   -7.49    7.72
  17   4   0   10.85    7.17
  -4  17   0    2.65    9.73
   3 -17   0   99.95   13.91
   3 -17   0  121.07   15.44
  17   3   0  141.19   16.72
  -3  17   0   93.72   17.29
  17   3   0  143.85   20.32
  17   2   0   15.68    9.76
   2 -17   0    7.71    6.59
  -2  17   0  -14.95    7.37
   2 -17   0   11.02    7.01
  17   2   0   15.53    8.14
  -1  17   0  206.14   24.52
   1 -17   0  189.05   15.12
   1 -17   0  199.42   20.35
  -1  17   0  201.95   14.20
  17   1   0  224.83   21.05
  17   1   0  228.32   24.18
   0  17   0   44.41   13.50
  17   0   0   23.57    9.61
   0  17   0    0.92    6.11
   0 -17   0   21.48    7.03
  17   0   0   24.97   10.83
   0 -17   0   31.03   10.05
  17  -1   0   95.29   15.56
   1  17   0   79.05   14.33
  -1 -17   0   89.02   10.84
  -1 -17   0  112.07   15.42
   1  17   0   94.85   17.86
  17  -1   0  126.01   19.24
   2  17   0    9.92    9.51
 -17   2   0    1.05    8.71
  -2 -17   0   11.27    5.57
  17  -2   0    1.20    8.77
  -2 -17   0   -2.41    7.28
   3  17   0   31.47   12.24
  -3 -17   0   20.37    9.30
 -17   3   0   27.08   10.56
  -3 -17   0   24.32    6.19
  17  -3   0   15.60    9.87
 -17   4   0   19.33   10.15
   4  17   0    0.82    9.68
  17  -4   0   -0.23    7.49
  -4 -17   0    4.53    8.55
  17  -5   0  151.19   20.22
   5  17   0  215.76   25.73
  -5 -17   0  221.07   22.59
 -17   5   0  166.26   21.19
  17  -6   0   -2.83    9.88
   6  17   0   -3.40    8.62
  -6 -17   0    2.43    7.96
 -17   6   0  -10.38    7.83
  -7 -17   0  673.72   35.25
 -17   7   0  673.88   36.46
  17  -7   0  625.58   35.57
   7  17   0  642.66   37.36
  17  -8   0    0.28    9.06
   8  17   0    2.96   10.93
 -17   8   0   -4.90    8.43
  -8 -17   0    1.20    8.85
   9  17   0  220.80   27.08
  17  -9   0  269.26   28.51
  -9 -17   0  282.74   27.41
 -17   9   0  315.72   29.71
  17 -10   0    6.67   10.23
  10  17   0   -2.00   10.26
 -17  10   0    0.03    8.38
 -10 -17   0  -12.83    7.13
 -17  11   0    8.99    9.56
  11  17   0   14.72   12.72
  17 -11   0  -14.73    8.54
 -11 -17   0    9.00   10.44
 -17  12   0    8.39   10.07
  12  17   0   19.25   13.54
 -12 -17   0   -0.67    9.17
  17 -12   0    2.69   10.97
  17 -13   0   33.68   13.32
  13  17   0   83.77   19.24
 -17  13   0   45.16   13.37
 -13 -17   0   51.96   14.44
  17 -14   0    8.13   12.44
  14  17   0   16.25   11.77
 -14 -17   0   12.30   11.18
 -17  14   0    3.37    9.54
 -15 -17   0  265.69   28.79
  17 -15   0  298.88   32.67
 -17  15   0  387.51   31.23
  15  17   0  300.82   33.81
  17 -16   0  -10.83    9.38
  16  17   0    7.87   12.55
 -16 -17   0    6.62    9.56
 -17  16   0    4.32   10.48
 -17  17   0    5.11   11.46
 -17 -17   0   41.14   14.83
  17  17   0   42.33   16.81
  17 -17   0   35.32   15.27
  17 -18   0   -8.34   12.60
  18  17   0   18.78   14.40
 -17  18   0   35.07   14.69
 -18 -17   0    7.68   11.26
 -16  18   0  109.45   21.92
  16 -18   0   67.54   18.05
  18  16   0   87.45   21.96
 -18 -16   0   82.55   18.40
  15 -18   0   18.03   12.91
 -15  18   0   -0.89   10.36
 -18 -15   0   15.69   11.67
  18  15   0  -11.92   10.54
 -18 -14   0  311.88   30.81
 -14  18   0  298.48   32.55
  14 -18   0  255.58   30.35
  18  14   0  206.21   29.68
 -13  18   0   -2.37    9.34
  18  13   0   -6.88    8.49
  13 -18   0   12.33   12.15
 -18 -13   0   19.96   10.93
 -12  18   0   15.80   12.00
  18  12   0   14.78   12.36
 -18 -12   0   11.35   10.45
  12 -18   0   12.53   12.36
  18  11   0    6.18   11.09
 -18 -11   0   -1.91    9.12
  11 -18   0   -1.07   10.08
 -11  18   0   -2.42    9.30
 -10  18   0   58.17   16.06
 -18 -10   0   31.66   11.78
  10 -18   0   64.01   16.08
  18  10   0   32.43   14.50
 -18  -9   0   11.88    8.50
   9 -18   0    2.38    8.55
  -9  18   0   -7.70    7.86
  18   9   0    7.56   10.82
 -18  -8   0  101.18   16.18
  -8  18   0  108.82   19.75
   8 -18   0   96.24   14.65
  18   8   0   72.88   17.54
   8 -18   0   82.50   15.77
   7 -18   0   12.15    9.41
  18   7   0   -7.30    9.23
  -7  18   0    8.39   11.11
 -18  -7   0    2.04    7.29
   7 -18   0   -2.07    6.57
   6 -18   0  119.78   17.34
   6 -18   0  153.76   17.47
  -6  18   0  127.86   20.17
  18   6   0  165.57   24.12
 -18  -6   0  150.91   18.41
  18   5   0   19.83   11.76
 -18  -5   0    5.36    7.74
  18   5   0   -6.33    6.06
   5 -18   0    0.82    7.40
  -5  18   0   -7.50    8.93
   5 -18   0   17.92    7.86
  18   4   0  129.46   19.74
   4 -18   0  174.62   18.87
  -4  18   0  128.95   20.71
 -18  -4   0  161.22   17.97
  18   4   0  150.41   17.20
   4 -18   0  202.52   20.00
  18   3   0   14.33   11.08
   3 -18   0    4.30    7.22
 -18  -3   0   -0.01    6.71
  -3  18   0   -1.53    8.77
   3 -18   0    3.36    6.53
  18   3   0   13.13    8.22
  18   2   0  278.16   21.17
  18   2   0  274.18   27.60
   2 -18   0  276.38   20.62
  -2  18   0  231.28   26.39
   2 -18   0  292.77   19.34
  -1  18   0   13.74   11.41
  -1  18   0    3.46    6.27
  18   1   0   12.41   10.39
   1 -18   0   13.03    7.40
  18   1   0    3.28    7.91
   1 -18   0   16.68    8.59
   0  18   0  472.46   32.15
   0 -18   0  415.09   21.54
  18   0   0  486.23   30.92
  18   0   0  422.14   26.35
   0 -18   0  463.57   27.58
   1  18   0    4.50   11.05
  -1 -18   0   29.06    7.43
  -1 -18   0   10.78    8.89
  18  -1   0   14.05    9.27
 -18   1   0    7.71    9.45
  -2 -18   0   41.09    8.26
  -2 -18   0   42.28   11.63
 -18   2   0   39.58   13.00
  18  -2   0   43.16   13.10
   2  18   0   40.37   14.06
 -18   3   0   15.63    9.86
  18  -3   0   -7.76    8.37
   3  18   0    2.63   10.42
  -3 -18   0   -4.77    6.68
  -4 -18   0  149.71   19.37
   4  18   0  113.48   20.25
 -18   4   0  135.00   19.96
  18  -4   0  122.31   17.98
   5  18   0   -4.34    9.86
 -18   5   0    0.74    8.07
  18  -5   0   -7.06    6.90
  -5 -18   0   10.92    9.60
  -6 -18   0  403.92   28.27
 -18   6   0  365.13   27.98
  18  -6   0  343.87   27.88
   6  18   0  398.98   31.36
   7  18   0   11.20   11.39
  18  -7   0    0.38    9.29
 -18   7   0    0.98    8.29
  -7 -18   0    0.93    8.69
   8  18   0  153.24   24.19
 -18   8   0  153.69   22.27
  18  -8   0  159.84   22.56
  -8 -18   0  129.91   19.17
  -9 -18   0   -1.71    7.64
 -18   9   0    1.23    8.27
   9  18   0   -3.60    9.95
  18  -9   0   -6.51   10.38
 -10 -18   0   32.19   12.89
  18 -10   0   20.74   14.23
 -18  10   0   29.29   12.68
  10  18   0   36.24   15.54
  18 -11   0   -4.77   11.51
 -18  11   0   -3.09    9.13
 -11 -18   0   13.14   10.38
  11  18   0    9.23   11.80
  12  18   0    0.56   11.46
 -12 -18   0   17.54   11.00
 -18  12   0   -0.41    8.65
  18 -12   0   11.87   13.73
 -13 -18   0    4.35   10.49
  18 -13   0   -1.44   12.19
 -18  13   0    0.12    9.92
  13  18   0   -4.16    9.27
  14  18   0  232.91   29.31
 -14 -18   0  263.27   29.08
  18 -14   0  289.08   31.90
 -18  14   0  350.22   34.40
 -15 -18   0    2.62   11.70
 -18  15   0   12.44   11.04
  15  18   0   28.86   13.50
  18 -15   0    0.35   13.39
  18 -16   0  324.07   36.73
 -18  16   0  266.90   31.06
  16  18   0  245.69   31.34
 -16 -18   0  256.64   31.13
  17  18   0   -8.76   10.93
  18 -17   0  -13.78   12.66
 -18  17   0    4.62   11.98
 -17 -18   0  -10.00    8.74
 -16  19   0    6.75   12.05
  19  16   0   13.63   13.74
  16 -19   0   -3.46   13.22
 -19 -16   0   16.16   11.82
 -19 -15   0  127.16   20.55
  15 -19   0  136.40   24.00
 -15  19   0   67.08   18.73
  19  15   0  106.12   22.77
 -19 -14   0   15.49   11.61
  19  14   0    3.67   12.08
  14 -19   0   -3.72   10.18
 -14  19   0    6.74   11.20
 -13  19   0  259.29   30.41
 -19 -13   0  234.93   26.95
  13 -19   0  264.34   29.11
  19  13   0  332.71   35.88
  12 -19   0   -1.64   10.52
 -12  19   0  -13.27    8.22
  19  12   0   11.91   12.05
 -19 -12   0    3.27   10.06
 -19 -11   0   11.01   10.27
  11 -19   0  -11.59    8.71
  19  11   0  -15.48    7.94
 -11  19   0   -2.57    9.75
  19  10   0    0.45   10.87
 -19 -10   0    1.16    8.62
  10 -19   0   -6.32    9.66
 -10  19   0    7.75   11.08
  -9  19   0   16.25   12.41
 -19  -9   0    2.15    8.80
  19   9   0   -3.90    9.85
   9 -19   0   -2.18    8.96
  19   8   0    3.29    9.78
  -8  19   0  -13.32    8.44
   8 -19   0    5.53    7.72
 -19  -8   0   -8.81    7.63
   8 -19   0   10.06    9.48
  19   7   0  236.64   28.10
   7 -19   0  293.38   23.94
 -19  -7   0  272.22   22.36
   7 -19   0  250.00   20.48
  -7  19   0  262.77   28.61
  19   6   0    1.43    9.99
 -19  -6   0    8.71    8.11
   6 -19   0   -4.98    6.68
  -6  19   0    7.56   10.81
   6 -19   0   21.20    9.60
  19   5   0  744.63   33.39
  -5  19   0  730.99   41.88
 -19  -5   0  757.67   35.82
   5 -19   0  747.42   35.26
  19   5   0  801.43   42.30
   5 -19   0  775.08   35.46
  19   4   0  -12.53    7.99
  19   4   0    2.52    7.47
 -19  -4   0   10.39    7.85
   4 -19   0   -7.26    6.05
   4 -19   0    4.83    8.14
  -4  19   0   24.60   11.27
   3 -19   0   53.12   12.27
  -3  19   0   66.27   16.79
   3 -19   0   55.89   12.14
  19   3   0   48.94   11.88
 -19  -3   0   74.58   12.91
  19   3   0   40.13   13.67
  -2  19   0   -7.67    9.84
  19   2   0   28.37   13.42
  -2  19   0    9.26    7.40
   2 -19   0    7.45    7.69
   2 -19   0    7.49    8.36
  19   2   0    7.43    8.44
   1 -19   0  191.28   21.18
  19   1   0  191.19   24.28
  19   1   0  171.41   20.56
  -1  19   0  131.23   20.67
   1 -19   0  149.31   16.58
  19   0   0   12.25    9.39
   0 -19   0   -0.13    6.33
  19   0   0   20.34   11.55
   0 -19   0  -10.62    7.20
   0  19   0   -0.80   10.38
   1  19   0  223.44   27.51
 -19   1   0  258.70   27.48
  -1 -19   0  219.95   15.94
  19  -1   0  226.54   24.10
  -1 -19   0  236.23   23.67
 -19   2   0    4.56    8.76
  -2 -19   0    7.79    9.11
   2  19   0   11.84   11.52
  19  -2   0   20.36   10.67
  19  -3   0  111.06   18.13
   3  19   0  108.54   20.25
  -3 -19   0   86.29   15.96
 -19   3   0   71.10   15.79
   4  19   0    2.03    9.76
  19  -4   0   15.02   10.37
  -4 -19   0    8.75    9.25
 -19   4   0    8.52    8.85
   5  19   0  185.25   25.33
  19  -5   0  199.98   23.21
 -19   5   0  201.48   23.91
  -5 -19   0  192.27   22.52
  19  -6   0    8.12   11.12
 -19   6   0    7.88    9.07
  -6 -19   0    2.64    8.61
   6  19   0    8.25   12.76
 -19   7   0  215.86   25.15
  19  -7   0  206.63   24.59
   7  19   0  159.89   24.66
  -7 -19   0  227.88   26.07
   8  19   0   10.94   11.47
 -19   8   0   -1.59    9.61
  19  -8   0    1.19   10.07
  -8 -19   0    6.62    9.62
 -19   9   0  118.04   20.71
  -9 -19   0  151.39   22.44
   9  19   0   99.58   19.82
  19  -9   0   83.75   19.19
  19 -10   0    6.69   12.04
  10  19   0    3.69   11.36
 -19  10   0   -8.26    8.45
 -10 -19   0    0.74    8.95
 -19  11   0    9.15   10.83
  11  19   0   31.76   15.43
  19 -11   0   60.01   17.97
 -11 -19   0   14.24   11.60
  12  19   0    0.98   13.21
 -12 -19   0    3.80   11.04
 -19  12   0    4.43   10.74
  19 -12   0   11.58   13.46
  13  19   0   42.24   18.28
 -13 -19   0   65.53   16.51
  19 -13   0  111.08   23.14
 -19  13   0   99.29   19.87
  14  19   0   -6.99   11.68
  19 -14   0  -14.43   11.13
 -14 -19   0   11.05   10.43
 -19  14   0   -4.76    9.67
 -19  15   0  249.24   30.18
 -15 -19   0  237.73   28.74
  15  19   0  256.15   33.34
  19 -15   0  281.19   33.89
  19 -16   0    5.69   12.83
  16  19   0   13.50   12.48
 -16 -19   0    2.06   10.31
 -19  16   0   -5.89    9.43
  15 -20   0   14.34   14.07
 -20 -15   0    6.90   10.84
 -15  20   0   11.98   13.44
  20  15   0   -7.21   11.24
  14 -20   0  176.12   26.01
 -14  20   0  148.91   25.18
 -20 -14   0  141.51   23.17
  20  14   0  119.77   23.33
 -20 -13   0   -8.31    9.18
 -13  20   0   -7.22   10.77
  13 -20   0  -12.33    9.43
  20  13   0   17.46   14.66
 -20 -12   0  131.87   20.69
  20  12   0   84.59   21.22
  12 -20   0   65.17   17.20
 -12  20   0  112.89   22.62
  20  11   0   -4.75   12.14
 -11  20   0   -0.29   11.30
 -20 -11   0   -2.08    8.90
  11 -20   0   -7.18    8.71
 -10  20   0   -2.88   10.42
  10 -20   0   24.66   11.89
  20  10   0   13.37   11.54
 -20 -10   0   21.33   11.37
   9 -20   0   -0.50    9.54
 -20  -9   0    3.06    9.68
  20   9   0   16.86   11.77
  -9  20   0   -8.11    9.38
  20   8   0  170.86   25.28
   8 -20   0  155.98   18.50
 -20  -8   0  164.34   21.45
  -8  20   0  145.85   24.28
   8 -20   0  156.83   21.51
   7 -20   0   -8.80    6.64
 -20  -7   0  -11.07    7.31
  -7  20   0   -0.28   10.48
   7 -20   0    1.56    8.55
  20   7   0   17.44   12.79
  -6  20   0  788.12   44.81
   6 -20   0  831.61   38.14
  20   6   0  848.84   46.14
 -20  -6   0  860.25   39.00
   6 -20   0  813.02   38.46
  20   5   0    6.93   11.42
 -20  -5   0   14.62    9.46
   5 -20   0   14.26    8.09
   5 -20   0   15.36    8.64
  20   5   0   12.95    8.16
  -5  20   0    2.38   10.26
 -20  -4   0  361.84   25.26
  20   4   0  365.28   24.97
  -4  20   0  390.78   32.23
   4 -20   0  435.73   27.37
  20   4   0  440.02   32.74
   4 -20   0  374.35   24.62
  20   3   0   -5.82    7.51
 -20  -3   0    3.12    7.30
   3 -20   0   -3.86    6.38
   3 -20   0    1.56    7.37
  -3  20   0    2.56   11.57
  20   3   0   -3.16    9.49
  20   2   0    2.69    8.41
   2 -20   0   23.70    9.15
 -20  -2   0    5.76    6.97
   2 -20   0   12.48    8.10
  -2  20   0   17.50   12.65
  20   2   0    4.97   10.20
  20   1   0   20.36   11.26
  -1  20   0    6.10   11.44
   1 -20   0    9.88    7.44
   1 -20   0   13.12    8.76
  20   1   0   18.38    9.93
  20   0   0   46.46   15.22
  20   0   0   58.96   13.93
   0  20   0   83.06   20.05
   0 -20   0   57.15   13.68
   0 -20   0   79.73   12.62
   1  20   0    7.77   11.41
 -20   1   0    9.24    9.95
  20  -1   0    3.23    8.91
  -1 -20   0    2.57    7.81
  20  -2   0  189.91   23.08
   2  20   0  210.33   27.57
  -2 -20   0  174.87   22.12
 -20   2   0  202.34   24.85
  20  -3   0   34.63   12.70
 -20   3   0   28.43   11.23
  -3 -20   0   15.03   10.13
   3  20   0   17.71   13.09
  -4 -20   0  187.82   23.35
 -20   4   0  196.46   24.51
   4  20   0  242.88   29.50
  20  -4   0  203.08   24.60
  -5 -20   0    0.22    8.96
 -20   5   0    0.79    8.45
  20  -5   0    0.55    9.10
   5  20   0   -3.71   11.66
  -6 -20   0   55.06   14.71
 -20   6   0   34.84   13.69
   6  20   0   67.00   18.97
  20  -6   0   40.24   14.91
 -20   7   0    4.54   10.05
  -7 -20   0    8.16    9.80
  20  -7   0   -3.56    8.58
   7  20   0    0.22   11.33
  -8 -20   0   33.08   13.50
  20  -8   0   40.71   13.97
 -20   8   0   23.39   13.20
   8  20   0   40.82   16.33
 -20   9   0    0.85    9.31
  -9 -20   0   -3.76    9.44
  20  -9   0   -0.69    9.48
   9  20   0   -4.26   11.16
  20 -10   0  256.02   30.49
 -10 -20   0  191.68   24.90
 -20  10   0  257.76   29.15
  10  20   0  253.31   31.89
  11  20   0   -3.19   12.01
 -20  11   0   -2.74   10.42
  20 -11   0   -0.94   11.06
 -11 -20   0   11.11   11.29
 -20  12   0  171.89   25.36
  12  20   0  180.48   28.32
  20 -12   0  215.87   28.20
 -12 -20   0  181.96   25.32
  13  20   0    0.63   11.52
 -20  13   0   15.92   11.57
 -13 -20   0  -10.27    8.79
  20 -13   0   -2.06   11.66
 -14 -20   0   86.77   19.98
  20 -14   0   98.68   22.38
  14  20   0   98.60   22.33
 -20  14   0   87.13   19.72
 -15 -20   0    3.97   10.12
 -20  15   0   -7.39    9.19
  20 -15   0  -18.96    9.19
  15  20   0   -0.60   13.62
 -13  21   0   67.75   19.59
 -21 -13   0   93.35   20.23
  13 -21   0   82.38   19.53
  21  13   0   75.42   22.42
  21  12   0  -12.08   11.32
  12 -21   0   -9.17   10.02
 -21 -12   0   20.39   11.77
 -12  21   0    1.48   11.70
 -21 -11   0   95.42   18.66
  21  11   0   60.52   17.71
 -11  21   0   78.08   20.08
  11 -21   0   55.89   16.94
 -10  21   0   -6.54   10.11
 -21 -10   0    0.53    9.31
  21  10   0   -5.14   10.07
  10 -21   0    3.99   10.90
  -9  21   0   12.86   12.76
 -21  -9   0   15.75   11.65
   9 -21   0    1.98    9.96
  21   9   0    5.97   11.37
 -21  -8   0   16.12   10.70
  -8  21   0   -1.65   10.75
  21   8   0   14.97   12.17
   8 -21   0  -12.95    8.95
 -21  -7   0  356.33   26.40
   7 -21   0  334.80   26.53
  -7  21   0  385.82   32.46
  21   7   0  341.12   35.97
   7 -21   0  316.19   25.00
   6 -21   0   -3.87    8.07
 -21  -6   0    9.64    9.33
   6 -21   0   -4.38    8.65
  21   6   0    4.08   11.21
  -6  21   0    7.93   12.29
  21   5   0  681.96   41.62
 -21  -5   0  575.15   32.31
   5 -21   0  595.41   33.15
  -5  21   0  644.29   41.07
   5 -21   0  675.10   34.76
  21   5   0  598.77   31.74
  21   4   0   -5.46   10.53
  21   4   0   -7.04    7.21
   4 -21   0    0.49    7.51
  -4  21   0   23.50   13.50
 -21  -4   0   -8.97    7.68
   4 -21   0    3.70    8.27
  21   3   0    0.95    8.93
   3 -21   0    5.18    8.20
 -21  -3   0    8.00    8.87
  21   3   0    0.40   10.60
  -3  21   0   17.12   13.96
   3 -21   0   16.46    9.39
   2 -21   0   -4.71    7.39
 -21  -2   0   -3.02    7.64
  -2  21   0   -1.17    9.16
  21   2   0    5.35   10.54
   2 -21   0    7.35    8.50
  21   2   0   -7.72    7.30
  21   1   0   15.15   12.13
  -1  21   0   13.21   13.78
   1 -21   0   27.39   10.48
 -21  -1   0   21.18    8.87
  21   1   0   18.79   10.67
 -21   0   0   -4.44    8.76
   0  21   0   -8.95   10.30
  21   0   0  -11.67    7.46
 -21   0   0   -0.40    6.43
   0 -21   0    8.62    8.86
  21  -1   0  178.54   23.22
   1  21   0  177.95   26.65
  -1 -21   0  160.35   22.09
 -21   1   0  155.58   22.71
 -21   2   0   20.15   11.75
  21  -2   0    9.01   10.70
   2  21   0   12.82   12.67
  -2 -21   0    3.04    8.48
   3  21   0  571.31   39.68
  -3 -21   0  591.07   35.14
 -21   3   0  495.84   34.73
  21  -3   0  621.25   36.42
  21  -4   0   28.95   12.14
 -21   4   0    5.24   10.36
   4  21   0   -4.25   11.71
  -4 -21   0   14.44   10.75
  -5 -21   0   73.67   16.82
   5  21   0  118.28   23.48
 -21   5   0   87.72   18.74
  21  -5   0  105.04   19.75
   6  21   0   21.22   14.57
  -6 -21   0    8.56   10.17
 -21   6   0   11.14   10.12
  21  -6   0   -4.57   10.09
   7  21   0   12.05   11.93
 -21   7   0   14.89   10.94
  -7 -21   0    2.51   10.15
  21  -7   0    5.28   10.12
 -21   8   0  -12.28    9.09
  21  -8   0    1.48   10.94
   8  21   0   -4.18    9.91
  -8 -21   0    1.36   10.75
  21  -9   0  132.67   21.98
 -21   9   0  152.72   23.66
  -9 -21   0  167.93   24.45
   9  21   0  150.77   26.07
  10  21   0    3.92   13.40
 -21  10   0    4.74   10.42
  21 -10   0   31.38   16.05
 -10 -21   0    1.15   10.28
  21 -11   0  332.54   34.50
  11  21   0  318.67   37.38
 -21  11   0  310.79   33.01
 -11 -21   0  349.03   35.62
 -21  12   0  -18.49    9.15
  12  21   0  -13.17   11.30
 -12 -21   0   -1.86   10.56
  21 -12   0   -4.58   10.14
 -13 -21   0   45.36   16.35
  13  21   0   53.70   18.90
 -21  13   0   45.19   16.14
  21 -13   0   28.72   14.56
 -22 -12   0   83.90   18.40
  22  12   0   90.96   22.90
 -12  22   0   99.31   22.43
  12 -22   0  134.71   23.08
  11 -22   0   -4.43   10.19
 -22 -11   0   14.59   10.72
 -11  22   0   -1.60   11.05
  22  11   0   -9.38   10.23
 -10  22   0   38.31   16.80
  10 -22   0   46.09   15.65
  22  10   0   70.74   19.43
 -22 -10   0   39.91   14.30
   9 -22   0   -5.75    9.26
  -9  22   0  -12.51   10.01
 -22  -9   0   -3.08    9.48
  22   9   0   -4.86   11.42
  -8  22   0   38.08   15.76
   8 -22   0   21.65   11.94
  22   8   0   -1.61   11.39
 -22  -8   0   23.01   11.94
  -7  22   0    5.68   11.72
 -22  -7   0  -12.65    7.33
   7 -22   0   -1.00    8.74
  22   7   0   12.03   11.69
 -22  -6   0  126.18   18.95
  -6  22   0  120.90   23.32
   6 -22   0  109.78   18.36
   6 -22   0  102.08   17.35
  22   6   0   96.67   20.81
 -22  -5   0   -0.71    7.97
   5 -22   0    8.58    8.36
  22   5   0    4.53   10.75
   5 -22   0    1.57    9.01
  -5  22   0  -14.71    9.95
 -22  -4   0  161.02   19.85
  22   4   0  139.08   19.46
  -4  22   0  162.47   25.65
  22   4   0  192.17   27.82
   4 -22   0  206.57   22.11
   4 -22   0  145.06   19.12
  -3  22   0    9.32   11.43
  22   3   0   -3.48   10.55
   3 -22   0   13.11    9.83
 -22  -3   0    3.03    8.72
  22   3   0   -6.32    9.75
   3 -22   0   -0.11    8.69
   2 -22   0   -4.27    7.76
  22   2   0   -0.96    7.88
  -2  22   0   10.64   12.09
  22   2   0    6.86   11.61
 -22  -2   0   -6.15    7.66
  22   1   0   11.45   10.68
   1 -22   0    2.69    8.06
  22   1   0    7.59   10.92
 -22  -1   0    1.22    7.72
  -1  22   0    5.22   11.26
   0  22   0   25.32   14.89
 -22   0   0   49.57   11.02
 -22   0   0   51.74   16.34
  22   0   0   56.15   14.50
   0 -22   0   45.36   13.08
 -22   1   0    7.91   10.18
  -1 -22   0    5.69    9.32
   1  22   0   -2.48   11.79
  22  -1   0    1.82   10.06
 -22   1   0   10.70    8.58
   2  22   0  339.15   34.97
  -2 -22   0  382.09   29.44
  22  -2   0  344.43   28.92
 -22   2   0  311.46   31.60
  22  -3   0    5.61   11.41
   3  22   0   29.87   15.01
 -22   3   0    8.58   10.33
  -3 -22   0   12.64   10.15
  22  -4   0  121.61   20.99
 -22   4   0   94.20   18.87
  -4 -22   0  113.37   19.15
   4  22   0  102.51   22.30
 -22   5   0    7.04   10.21
   5  22   0   12.38   12.68
  -5 -22   0    0.01    9.59
  22  -5   0   -3.48   10.33
  22  -6   0   -2.31   10.62
 -22   6   0   17.33   12.46
   6  22   0   21.41   15.56
  -6 -22   0    7.77   11.57
   7  22   0   16.37   13.84
  22  -7   0    2.05    9.65
  -7 -22   0   14.53   11.43
 -22   7   0   13.07   10.58
   8  22   0  142.44   25.89
 -22   8   0  148.62   23.34
  22  -8   0  120.62   23.15
  -8 -22   0   94.43   19.33
   9  22   0  -20.54   10.26
  -9 -22   0   -6.34    8.66
  22  -9   0   -7.77    9.67
 -22   9   0    5.35   10.56
 -22  10   0  201.58   27.90
  10  22   0  147.15   25.90
 -10 -22   0  162.43   24.56
  22 -10   0  162.48   26.89
 -11 -22   0    4.08   10.95
  22 -11   0   -3.64   12.05
  11  22   0   34.79   16.98
 -22  11   0    3.92   11.50
 -12 -22   0   80.69   19.77
  12  22   0  127.60   26.14
 -22  12   0   66.64   17.58
  22 -12   0   97.60   22.48
  10 -23   0    9.87   12.60
 -23 -10   0    3.28    9.36
  23  10   0  -14.01   10.29
 -10  23   0  -10.05   11.55
   9 -23   0  197.36   25.61
 -23  -9   0  195.47   24.50
  23   9   0  144.92   26.49
  -9  23   0  203.32   30.13
  -8  23   0   -4.24   10.36
  23   8   0    8.56   12.93
 -23  -8   0    4.25    9.90
   8 -23   0  -11.61    9.19
  23   7   0    5.54   12.73
 -23  -7   0    6.12   10.11
  -7  23   0    9.24   12.31
   7 -23   0   -2.12   10.35
  -6  23   0   16.51   14.29
   6 -23   0   -3.89    9.49
   6 -23   0    0.82    9.71
  23   6   0   12.21   11.95
 -23  -6   0    2.17    8.69
 -23  -5   0  -15.67    7.79
   5 -23   0   -0.57    8.48
  -5  23   0  -12.93   11.24
   5 -23   0  -12.84    8.53
  23   5   0   -0.71   12.28
   4 -23   0    2.24    8.24
  23   4   0    9.53    9.62
  23   4   0   10.57   13.35
  -4  23   0   24.84   14.48
 -23  -4   0   -3.77    8.18
  23   3   0   96.39   20.92
   3 -23   0   93.17   17.40
  -3  23   0  146.20   25.15
 -23  -3   0  144.65   19.14
  23   3   0   94.67   17.47
  -2  23   0   -6.10   12.16
  23   2   0  -10.33   10.77
 -23  -2   0   17.64    9.51
   2 -23   0   17.96    9.79
  23   2   0    0.64    9.85
  23   1   0  144.67   21.84
 -23  -1   0  176.12   20.27
 -23  -1   0  172.60   26.37
   1 -23   0  164.07   21.92
  -1  23   0  174.58   28.39
 -23   0   0   -7.53    8.87
   0 -23   0    5.60    9.91
  23   0   0   -5.14    9.25
   0  23   0    0.59   12.45
  -1 -23   0  156.38   22.49
  23  -1   0  173.65   24.44
   1  23   0   94.23   20.88
 -23   1   0  117.97   20.97
  -2 -23   0   12.33   10.99
   2  23   0    5.14   12.89
  23  -2   0   -7.01   10.33
 -23   2   0    6.46   10.80
  -3 -23   0   39.59   14.63
  23  -3   0   88.59   19.77
   3  23   0   89.62   23.06
 -23   3   0   67.41   17.30
  -4 -23   0   -4.24    9.14
  23  -4   0   -5.03   11.03
   4  23   0   -0.10   11.43
 -23   4   0   -3.81    9.58
  23  -5   0   46.37   17.26
  -5 -23   0   61.98   17.10
   5  23   0   44.68   18.38
 -23   5   0   29.89   13.21
 -23   6   0   -0.38   10.49
  23  -6   0   -7.54   11.38
   6  23   0    3.46   11.73
  -6 -23   0   -3.97    9.36
  23  -7   0   50.67   16.98
  -7 -23   0   86.91   19.09
   7  23   0  127.15   24.24
 -23   7   0  104.98   19.95
 -23   8   0  -18.40    8.54
  23  -8   0    5.56   11.87
  -8 -23   0    9.72   12.74
   8  23   0  -10.14   11.53
  23  -9   0   23.84   14.08
  -9 -23   0   27.74   13.28
 -23   9   0    3.85   12.43
   9  23   0   31.14   16.83
  10  23   0    1.47   12.75
 -10 -23   0   -6.44   10.55
  23 -10   0   -1.86   12.18
 -23  10   0    3.07   10.52
   7 -24   0   -2.15   10.45
  -7  24   0  -15.55   10.44
  24   7   0    7.99   14.52
 -24  -7   0   -6.47    8.65
  24   6   0   -5.72   11.99
  -6  24   0    4.26   13.59
 -24  -6   0   14.50   10.43
   5 -24   0   -4.60    8.39
  24   5   0   13.49   14.11
  -5  24   0    1.88   12.35
 -24  -5   0    5.82    9.35
  -4  24   0   91.99   22.20
 -24  -4   0   87.88   16.64
   4 -24   0  129.37   20.59
  24   4   0   91.90   21.29
 -24  -3   0    0.54    8.70
   3 -24   0   14.56    9.77
  24   3   0    5.35   10.13
  24   3   0   10.85   13.01
  -3  24   0   -0.41   12.68
 -24  -2   0  283.90   32.27
   2 -24   0  188.43   24.03
  -2  24   0  215.87   32.87
  24   2   0  210.91   26.72
   1 -24   0   11.46   10.92
  24   1   0   12.05   11.14
  -1  24   0   10.14   14.65
 -24  -1   0   -1.12   10.45
   0 -24   0   76.80   16.65
   0  24   0   55.36   18.84
 -24   0   0   86.78   20.07
  24   0   0   45.77   14.78
 -24   1   0   22.27   12.42
  24  -1   0   -4.25   11.05
  -1 -24   0    0.48    9.80
   1  24   0    5.60   12.96
  24  -2   0   18.58   14.22
   2  24   0    6.30   15.16
  -2 -24   0   17.77   11.11
 -24   2   0   20.50   12.21
  -3 -24   0   11.54   11.93
 -24   3   0   11.84   12.51
   3  24   0   -8.47   13.82
  24  -3   0  -10.24   10.19
   4  24   0   26.97   17.04
  -4 -24   0   64.81   17.04
  24  -4   0   44.79   16.59
 -24   4   0   43.92   15.55
 -24   5   0   -3.48    9.95
  24  -5   0  -15.68   10.98
  -5 -24   0    2.16    9.85
   5  24   0   12.42   15.20
  -6 -24   0  168.46   24.70
 -24   6   0  176.08   25.95
  24  -6   0  174.30   26.91
   6  24   0  129.23   24.99
  -7 -24   0    4.81   11.15
   7  24   0  -15.26   11.78
 -24   7   0   13.80   11.30
  24  -7   0   -5.22   11.90
   2 -25   0   -1.28   10.14
 -25  -2   0    2.23   10.59
  25   2   0   19.41   13.50
  -2  25   0    4.88   14.49
  25   1   0  293.42   31.71
 -25  -1   0  232.52   30.98
  -1  25   0  218.84   31.52
   1 -25   0  178.19   24.60
   0  25   0    7.42   14.52
 -25   0   0   15.46   12.85
   0 -25   0    3.53   11.38
  25   0   0   27.08   13.68
  25  -1   0    7.53   12.83
 -25   1   0   14.70   12.94
  -1 -25   0   14.91   11.29
   1  25   0   -3.03   13.92
   2  25   0   12.23   16.21
 -25   2   0   13.95   11.94
  -2 -25   0   28.08   13.18
  25  -2   0   -7.34   11.94
   0   0   1 4806.34  101.69
   0   1  -1 1011.49   22.82
   0   1  -1 1026.38   23.84
   0  -1  -1 1029.19   23.81
   1   0  -1 1017.49   24.25
   1   0  -1 1039.32   24.13
  -1   0  -1 1027.91   23.82
   0  -1   1  917.07   23.79
  -1   0   1 1025.61   22.90
   0   1   1 1018.77   23.71
  -1   1  -1 3795.91   83.57
  -1   1  -1 3958.14   81.50
  -1   1  -1 3906.97   83.72
  -1  -1  -1 3869.89   83.00
   1   1  -1 3858.05   83.48
   1   1  -1 3810.58   83.55
   1  -1  -1 3817.59   83.52
  -1  -1   1 3895.38   83.38
   1  -1   1 3984.10   81.51
   1  -1   1 3859.82   83.70
   1   1   1 3830.94   82.93
  -1   1   1 3836.25   83.44
  -1   1   1 3827.83   84.32
   1  -2  -1 1319.63   32.09
   2   1  -1 1357.56   31.81
   2   1  -1 1358.55   30.48
  -2  -1  -1 1409.08   31.43
  -1   2  -1 1372.94   32.08
  -1   2  -1 1375.29   31.92
  -1   2  -1 1376.34   31.09
   2   1  -1 1353.23   32.80
   1  -2   1 1365.53   32.63
   2   1   1 1362.60   31.48
   1  -2   1 1328.89   31.81
  -1   2   1 1346.99   32.10
  -2  -1   1 1343.64   30.40
  -1   2   1 1373.02   33.23
  -2  -1   1 1365.11   31.46
   0  -2  -1  127.73    5.21
  -2   0  -1  125.46    5.70
   2   0  -1  119.92    6.13
   0   2  -1  123.00    5.35
   0   2  -1  126.84    5.36
   2   0  -1  123.22    5.30
  -2   0  -1  123.79    5.71
   0   2   1  126.80    6.06
   2   0   1  129.53    5.80
   0  -2   1  135.86    4.98
  -2   0   1  130.60    4.46
   2   0   1  123.57    4.42
   0  -2   1  129.79    5.72
   1   2  -1  370.96   10.91
   1   2  -1  375.72   11.64
  -1  -2  -1  378.20   10.45
   2  -1  -1  364.16   11.38
  -2   1  -1  395.64   12.01
  -2   1  -1  396.40    9.96
   2  -1   1  371.36   11.83
  -2   1   1  376.82   12.73
  -2   1   1  365.81   11.27
  -1  -2   1  379.64   11.52
   1   2   1  372.71   11.74
   2   2  -1   41.54    4.88
   2  -2  -1   51.86    5.28
   2   2  -1   47.15    2.58
  -2  -2  -1   54.37    4.01
  -2   2  -1   47.96    3.78
  -2   2  -1   50.11    5.16
   2   2  -1   55.34    4.58
  -2   2   1   50.51    5.14
   2  -2   1   35.03    4.18
  -2   2   1   41.02    4.73
  -2  -2   1   39.18    4.11
   2   2   1   53.08    4.97
   3   2  -1   27.76    4.90
   2  -3  -1   19.94    4.22
  -2   3  -1   14.86    3.35
   2  -3  -1   21.42    2.23
   3   2  -1   19.70    2.54
  -3  -2  -1   21.46    3.54
  -3  -2   1   17.15    2.38
  -2   3   1   10.07    3.59
   2  -3   1   12.80    3.78
   2  -3   1   19.81    3.70
   3   2   1   10.57    3.31
  -3  -2   1   12.95    3.26
   1  -3  -1  299.02   10.69
   3   1  -1  294.02   11.39
   1  -3  -1  303.68    8.82
   3   1  -1  290.88    9.33
  -1   3  -1  288.53   10.32
  -3  -1  -1  301.08   10.51
  -1   3  -1  286.04   10.00
   1  -3   1  293.67   10.24
   3   1   1  298.87   10.19
  -3  -1   1  297.23    9.22
  -3  -1   1  291.85    9.68
  -1   3   1  292.24   10.58
   1  -3   1  299.63   10.73
   0   3  -1   13.27    3.25
   3   0  -1   11.36    3.43
  -3   0  -1   16.22    3.68
   3   0  -1    9.14    2.93
   0   3  -1   12.14    2.31
   0   3  -1   17.13    3.46
   0  -3  -1    8.24    2.72
  -3   0   1   15.62    3.27
   3   0   1   19.55    2.91
   0  -3   1   15.78    2.58
   3   0   1   20.99    3.52
   0  -3   1   15.42    3.34
  -3   0   1   18.04    2.43
   0   3   1   14.54    3.91
   3  -1  -1   14.95    3.50
   1   3  -1   21.12    2.18
  -1  -3  -1   18.73    2.90
   1   3  -1   20.40    4.00
   1   3  -1   24.05    3.61
  -3   1   1   16.15    4.06
  -1  -3   1   20.98    3.70
  -1  -3   1   23.83    2.19
  -3   1   1   23.82    1.92
  -3   1   1   17.54    4.37
   3  -1   1   26.93    4.36
   1   3   1   15.85    3.98
  -2  -3  -1  201.36    6.96
  -3   2  -1  213.29    8.19
   2   3  -1  211.59   10.04
   2   3  -1  220.98    7.95
   3  -2  -1  200.66    9.70
  -3   2   1  214.88   10.38
   3  -2   1  207.12    9.75
  -2  -3   1  197.62    9.05
   2   3   1  209.95    9.87
  -3   3  -1  290.75   10.77
   3  -3  -1  268.84   11.61
   3   3  -1  287.42    7.41
   3   3  -1  278.24   12.24
  -3  -3  -1  293.12    8.89
   3  -3  -1  284.51    7.67
   3  -3   1  287.56   11.72
  -3   3   1  292.02    7.50
  -3  -3   1  294.88   11.51
   3   3   1  305.79   12.46
  -3   3   1  290.75   12.93
  -3  -3   1  291.20    7.32
   3  -4  -1  964.41   23.08
   4   3  -1  981.05   28.61
  -4  -3  -1  983.98   25.57
  -4  -3  -1  981.88   24.04
   4   3  -1  966.47   22.88
   3  -4  -1  980.82   27.81
  -3   4  -1  977.78   26.75
  -4  -3   1  975.91   26.79
   4   3   1  995.99   28.03
   3  -4   1  963.58   27.56
   3  -4   1 1012.20   27.31
  -3   4   1  966.37   29.13
  -4  -3   1  975.01   22.78
  -2   4  -1    7.23    3.37
   2  -4  -1   14.13    2.39
   4   2  -1    9.44    2.53
   4   2  -1    8.52    4.24
   2  -4  -1    5.41    3.34
  -4  -2   1   11.23    3.33
   4   2   1   13.48    3.79
   2  -4   1    9.63    3.05
  -4  -2   1   12.85    2.67
   2  -4   1    8.14    3.20
  -2   4   1    8.31    3.70
   4   1  -1  981.82   28.36
  -1   4  -1 1018.64   26.10
   1  -4  -1 1044.25   26.95
  -1   4  -1 1048.50   27.50
   4   1  -1 1022.02   25.64
   1  -4  -1 1040.06   25.11
   1  -4   1 1027.70   27.17
  -1   4   1 1001.98   28.60
  -4  -1   1 1004.01   25.39
  -4  -1   1 1021.47   25.65
   1  -4   1  997.20   26.00
   4   1   1 1067.75   27.18
   4   1   1 1004.19   26.56
   0   4  -1  598.79   18.66
   0  -4  -1  605.80   17.09
   0   4  -1  611.96   16.86
   0  -4  -1  612.65   17.35
   4   0  -1  586.09   17.64
   0   4  -1  561.56   15.95
   4   0  -1  626.31   20.13
   0   4   1  616.37   17.51
   0  -4   1  607.13   16.27
   0   4   1  598.51   19.62
  -4   0   1  638.06   16.04
   4   0   1  635.22   18.83
   4   0   1  628.06   17.66
   0  -4   1  600.16   18.49
   1   4  -1  627.70   15.40
  -1  -4  -1  650.60   17.47
   4  -1  -1  633.19   19.01
   1   4  -1  624.47   19.59
   4  -1  -1  647.42   20.90
   1   4  -1  644.65   16.74
  -1  -4   1  596.97   18.93
  -1  -4   1  642.93   15.53
   1   4   1  629.18   20.11
   4  -1   1  608.60   18.17
   4  -1   1  613.21   19.46
   4  -2  -1   64.71    6.66
   2   4  -1   46.70    5.78
  -4   2  -1   64.96    5.96
   2   4  -1   60.35    4.80
  -2  -4  -1   64.05    3.74
  -2  -4   1   51.46    5.54
  -4   2   1   58.60    7.02
   2   4   1   57.38    6.39
   4  -2   1   61.92    6.47
   4  -3  -1 2047.54   51.29
  -3  -4  -1 2113.45   45.91
  -4   3  -1 2115.22   49.92
   3   4  -1 2114.78   52.37
   3   4  -1 2065.51   46.91
  -4   3   1 2223.77   46.64
   3   4   1 2022.02   51.86
  -3  -4   1 2155.32   51.13
  -4   3   1 2073.57   53.07
   4  -3   1 1989.94   51.30
   4   4  -1 1639.69   35.56
  -4  -4  -1 1693.47   37.18
   4   4  -1 1607.60   43.58
   4  -4  -1 1591.78   42.52
  -4   4  -1 1661.26   41.43
   4   4   1 1609.16   43.05
  -4  -4   1 1598.68   41.77
  -4  -4   1 1619.72   35.38
  -4   4   1 1659.39   44.32
   4  -4   1 1683.39   43.09
   5   4  -1 1041.65   31.98
   4  -5  -1 1029.15   31.06
   5   4  -1 1078.48   25.07
   4  -5  -1 1069.11   25.95
  -4   5  -1 1071.40   30.36
   4  -5   1 1118.60   30.45
  -5  -4   1 1020.20   30.13
   4  -5   1 1037.14   30.96
  -5  -4   1 1077.01   24.86
  -4   5   1 1058.68   32.85
   5   4   1 1076.10   31.85
  -3   5  -1  748.27   23.15
   3  -5  -1  760.72   23.52
   5   3  -1  762.73   19.50
   3  -5  -1  745.99   19.56
   5   3  -1  741.22   24.46
   5   3   1  743.97   23.74
   3  -5   1  777.06   22.91
  -3   5   1  733.06   24.79
  -5  -3   1  743.01   22.55
  -5  -3   1  740.88   19.19
   3  -5   1  796.95   23.63
   5   2  -1  411.04   16.15
   2  -5  -1  406.85   12.40
  -2   5  -1  405.06   15.05
   2  -5  -1  396.62   14.88
   5   2  -1  405.01   12.83
  -5  -2   1  407.16   13.99
   5   2   1  398.04   13.96
   2  -5   1  372.15   14.26
   5   2   1  390.54   14.72
  -2   5   1  434.29   16.95
   2  -5   1  392.04   14.29
  -5  -2   1  387.15   12.36
   5   1  -1   42.45    6.61
   5   1  -1   46.95    5.05
   1  -5  -1   40.50    5.18
   1  -5  -1   46.50    4.60
  -1   5  -1   48.14    6.32
   5   1   1   48.65    5.86
  -5  -1   1   42.96    4.54
   5   1   1   46.65    5.57
  -1   5   1   53.98    7.13
   1  -5   1   46.29    5.40
   1  -5   1   43.66    4.88
   5   0  -1  139.03    9.29
   0  -5  -1  144.38    7.57
   0   5  -1  141.72    6.62
   0   5  -1  140.17    7.18
   0   5  -1  154.04    9.05
   5   0  -1  150.69    8.21
   0  -5  -1  139.99    7.60
   0  -5   1  147.54    6.85
   0  -5   1  149.78    8.66
   5   0   1  132.93    7.93
   0   5   1  146.98    9.74
   5   0   1  143.85    8.65
   5  -1  -1  951.18   29.72
  -1  -5  -1 1028.23   25.90
   1   5  -1  999.24   29.16
   5  -1  -1 1037.74   28.02
  -1  -5  -1 1003.15   27.06
   1   5  -1 1012.06   23.82
   1   5  -1 1026.02   24.78
   5  -1   1  948.90   27.32
   5  -1   1 1000.42   28.55
  -1  -5   1  999.20   27.99
   1   5   1 1001.91   29.68
  -1  -5   1 1004.74   23.91
   5  -2  -1   46.06    5.91
   2   5  -1   60.84    2.86
   2   5  -1   57.69    7.72
  -5   2  -1   61.45    6.53
   2   5  -1   60.81    4.79
  -5   2   1   68.12    8.35
  -2  -5   1   59.20    2.87
   2   5   1   72.02    8.15
  -2  -5   1   53.02    6.29
   5  -2   1   51.71    6.35
  -3  -5  -1  775.90   17.70
   3   5  -1  773.26   19.21
   5  -3  -1  779.10   24.48
   3   5  -1  741.14   24.77
  -5   3  -1  769.06   23.05
   5  -3   1  763.70   24.55
  -5   3   1  760.95   25.60
  -3  -5   1  784.67   23.95
   3   5   1  753.95   25.23
  -5   4  -1  864.57   25.40
  -4  -5  -1  846.37   19.78
   4   5  -1  827.18   27.32
   5  -4  -1  821.58   26.35
  -4  -5   1  838.52   25.98
  -5   4   1  809.93   27.51
   4   5   1  834.29   27.37
   5  -4   1  830.92   26.83
   5   5  -1   98.36   10.51
   5  -5  -1   77.04    9.39
  -5  -5  -1   89.63    5.27
  -5   5  -1   99.87    9.12
  -5   5   1   63.46    8.73
   5   5   1  110.43   10.91
  -5  -5   1  109.23    8.56
  -5  -5   1   95.52    3.70
   5  -5   1  102.67   10.18
   5  -6  -1   61.57    5.55
  -5   6  -1   51.36    7.74
   6   5  -1   69.04   10.15
  -6  -5  -1   68.75    5.80
   6   5  -1   65.18    4.54
   5  -6  -1   54.64    8.34
  -5   6   1   67.95    9.85
   6   5   1   61.81    8.54
  -6  -5   1   62.94    4.41
   5  -6   1   69.51    8.79
  -6  -5   1   65.90    8.08
   6   4  -1   95.54   10.22
  -4   6  -1  109.57    9.07
   6   4  -1  104.46    5.75
   4  -6  -1  108.74   10.22
   4  -6  -1   88.83    5.91
   6   4   1  120.07   11.39
   4  -6   1  104.99    8.26
  -6  -4   1   99.07    9.15
  -4   6   1  114.89   11.60
   4  -6   1   96.28    9.88
  -6  -4   1   89.33    5.41
   6   3  -1   47.84    7.63
  -3   6  -1   56.84    7.36
   6   3  -1   60.37    5.40
   3  -6  -1   47.75    4.91
   3  -6  -1   49.53    7.05
   6   3   1   54.58    7.37
   3  -6   1   53.42    6.45
  -6  -3   1   73.23    6.07
   3  -6   1   46.09    6.57
  -6  -3   1   57.59    6.51
  -3   6   1   58.92    8.45
   6   2  -1   93.00    6.40
   2  -6  -1   92.97    8.42
  -2   6  -1   77.69    7.98
   6   2  -1   68.43    8.13
   2  -6  -1   79.82    5.83
   2  -6   1   96.89    7.39
   6   2   1   88.68    7.37
   2  -6   1   90.01    7.16
  -2   6   1  103.60   10.34
   6   2   1   94.21    7.64
  -6  -2   1   90.93    6.89
   6   1  -1 1017.91   27.62
   1  -6  -1 1009.14   28.09
  -1   6  -1 1021.09   30.01
   1  -6  -1 1014.39   27.01
   6   1  -1 1010.46   31.10
  -6  -1   1 1001.17   26.69
   6   1   1 1022.59   28.92
  -1   6   1  986.65   30.87
   6   1   1 1017.11   28.59
   1  -6   1  998.93   27.17
   1  -6   1  981.94   28.74
   0   6  -1 1293.77   31.74
   0  -6  -1 1285.92   32.82
   6   0  -1 1265.12   33.88
   0   6  -1 1278.53   35.86
   0  -6  -1 1251.84   33.05
   0   6  -1 1305.86   33.32
   6   0  -1 1268.87   36.68
   0  -6   1 1260.96   34.62
   6   0   1 1256.21   34.72
   6   0   1 1226.56   34.20
   0   6   1 1207.38   36.22
   0  -6   1 1282.12   31.52
   1   6  -1 1619.44   44.22
  -1  -6  -1 1621.38   41.48
   6  -1  -1 1682.73   42.61
   1   6  -1 1674.37   37.75
   1   6  -1 1671.66   38.40
  -1  -6  -1 1619.51   39.58
   6  -1  -1 1561.10   44.64
  -1  -6   1 1643.99   37.83
   6  -1   1 1663.83   43.20
  -1  -6   1 1589.15   42.37
   1   6   1 1631.40   44.67
   6  -1   1 1578.47   42.23
   2   6  -1   55.68    7.87
   6  -2  -1   49.94    7.14
  -2  -6  -1   58.07    5.39
  -2  -6  -1   44.21    5.97
   2   6  -1   42.58    3.19
  -6   2  -1   42.47    6.14
   2   6  -1   58.57    4.81
   6  -2   1   38.29    6.09
  -2  -6   1   45.70    3.22
   2   6   1   42.59    7.14
  -2  -6   1   54.37    6.98
  -6   2   1   36.84    7.45
  -3  -6  -1  140.74    9.50
   3   6  -1  145.29    6.39
  -6   3  -1  144.70    9.41
   3   6  -1  129.43   10.82
   6  -3  -1  160.56   10.80
  -6   3   1  148.39   11.36
   3   6   1  149.48   11.43
   6  -3   1  137.80   10.00
  -3  -6   1  133.96    9.64
  -6   4  -1   19.46    4.88
   6  -4  -1   18.95    6.10
   4   6  -1    7.49    5.61
  -4  -6   1   15.49    4.73
  -6   4   1   23.47    6.54
   6  -4   1   19.63    5.86
   4   6   1    6.05    4.65
  -5  -6  -1  474.74   12.76
   6  -5  -1  517.42   20.73
   5   6  -1  493.20   21.19
  -6   5  -1  492.17   19.44
  -5  -6   1  519.12   20.19
  -6   5   1  479.39   21.85
   5   6   1  523.17   21.54
   6  -5   1  445.05   20.38
   6   6  -1  522.01   23.38
   6  -6  -1  482.41   21.56
  -6   6  -1  478.70   20.17
  -6  -6  -1  508.90   14.28
  -6   6   1  545.84   23.53
  -6  -6   1  474.75   20.45
   6  -6   1  480.52   21.04
   6   6   1  511.87   22.78
   7   6  -1  260.99   17.52
  -6   7  -1  248.25   15.06
  -7  -6  -1  244.45   10.18
   6  -7  -1  249.73   15.66
  -6   7   1  273.28   17.68
  -7  -6   1  270.47   15.57
   7   6   1  268.93   16.94
  -7  -6   1  256.96    8.71
   6  -7   1  253.24   15.51
   5  -7  -1   97.01   11.62
   7   5  -1   80.47    6.11
   5  -7  -1   90.91    6.72
   7   5  -1   84.90   10.86
  -5   7  -1   98.71   10.65
  -7  -5   1   90.64   10.19
   7   5   1   94.51   10.74
  -5   7   1  118.07   13.52
   5  -7   1   90.16   10.54
  -7  -5   1   73.78    5.85
   5  -7   1   85.42    9.40
   7   4  -1  167.29   13.76
   7   4  -1  192.15    9.11
   4  -7  -1  173.77    8.97
   4  -7  -1  184.14   12.51
  -4   7  -1  180.60   12.72
   7   4   1  190.58   13.28
   4  -7   1  213.44   11.71
  -7  -4   1  179.48   11.95
   4  -7   1  175.24   12.87
  -4   7   1  191.38   13.85
   7   3  -1   62.20    6.35
   3  -7  -1   67.95    8.15
   7   3  -1   61.21    8.79
  -3   7  -1   54.15    7.94
   3  -7  -1   67.25    6.41
   3  -7   1   45.73    6.65
  -3   7   1   45.31    8.64
   7   3   1   54.60    6.82
   3  -7   1   53.83    7.74
  -7  -3   1   44.91    6.81
   7   3   1   72.68    9.19
  -2   7  -1 1911.83   50.55
   7   2  -1 1932.08   46.69
   2  -7  -1 1811.76   48.16
   2  -7  -1 1828.80   46.01
   7   2  -1 1948.02   51.89
   2  -7   1 1867.26   47.71
   7   2   1 1870.16   47.95
   2  -7   1 1874.19   48.56
  -7  -2   1 1898.92   47.24
   7   2   1 1898.25   49.59
  -2   7   1 1905.12   52.01
   7   1  -1 1272.85   39.21
   7   1  -1 1347.71   35.89
   1  -7  -1 1330.89   35.04
   1  -7  -1 1356.88   35.97
  -1   7  -1 1339.80   38.65
   7   1   1 1343.94   36.84
   7   1   1 1296.23   37.15
   1  -7   1 1357.83   37.17
  -1   7   1 1331.83   39.72
   1  -7   1 1329.18   34.83
   0  -7  -1  175.23    9.88
   7   0  -1  181.00   10.75
   0   7  -1  179.87    8.94
   0  -7  -1  158.96    9.28
   7   0  -1  183.66   12.78
   0   7  -1  188.58   12.35
   0  -7   1  188.77    8.80
   0  -7   1  190.68   11.11
   7   0   1  167.27   10.90
   7   0   1  178.30   11.15
   0   7   1  183.29   12.33
   1   7  -1  100.88    6.33
  -1  -7  -1  100.73    8.27
   1   7  -1   92.09   10.54
   1   7  -1   95.08    5.98
   7  -1  -1   82.41    9.69
   7  -1  -1   96.30    9.43
  -1  -7  -1  106.36    7.35
   1   7   1  101.28   10.86
   7  -1   1   84.55    8.91
  -1  -7   1   88.29    5.79
  -1  -7   1  101.65    9.59
   7  -1   1   97.62    9.72
  -2  -7  -1   44.20    5.33
   2   7  -1   48.92    4.01
   2   7  -1   58.09    5.29
  -2  -7  -1   31.82    5.93
   7  -2  -1   48.02    7.60
  -7   2  -1   42.99    6.96
   2   7  -1   51.40    8.53
   7  -2   1   55.27    8.59
   2   7   1   35.65    7.09
  -7   2   1   38.58    7.84
  -2  -7   1   46.18    6.99
  -2  -7   1   48.67    3.96
  -7   3  -1    2.02    4.44
   3   7  -1    2.12    5.64
  -3  -7  -1    1.63    4.35
  -3  -7  -1    8.81    3.70
   7  -3  -1    4.02    5.02
   3   7  -1   10.04    3.40
   7  -3   1    2.71    5.28
  -7   3   1    7.84    6.18
   3   7   1   -3.39    5.11
  -3  -7   1    3.91    1.56
  -3  -7   1    3.88    4.48
  -4  -7  -1  613.06   22.75
  -7   4  -1  617.07   22.74
   4   7  -1  615.02   25.02
   7  -4  -1  624.66   24.29
  -4  -7   1  606.64   23.03
   4   7   1  634.14   25.32
  -7   4   1  605.08   25.25
   7  -4   1  622.31   23.85
  -7   5  -1  187.73   12.66
   5   7  -1  192.08   15.46
   7  -5  -1  185.21   13.72
  -5  -7  -1  193.37   13.31
   5   7   1  208.66   15.34
  -5  -7   1  171.65   12.45
   7  -5   1  191.14   13.91
  -7   5   1  185.97   14.78
   7  -6  -1  901.61   32.41
  -6  -7  -1  940.30   22.31
  -6  -7  -1  931.38   31.22
  -7   6  -1 1048.74   32.46
   6   7  -1  906.88   33.82
   7  -6   1  954.06   33.21
   6   7   1  948.15   33.86
  -7   6   1  947.54   34.44
  -6  -7   1  998.16   32.42
   7   7  -1  134.52   14.16
   7  -7  -1  167.12   13.83
  -7  -7  -1  168.65    7.51
  -7   7  -1  164.07   12.84
  -7   7   1  181.58   15.47
  -7  -7   1  163.87   12.64
   7   7   1  193.62   17.17
   7  -7   1  159.66   13.40
   8   7  -1    6.77    6.85
  -8  -7  -1   12.09    4.12
  -7   8  -1   16.77    7.28
   7  -8  -1   14.09    7.04
   7  -8   1   11.78    6.53
  -8  -7   1   12.74    6.15
  -8  -7   1   22.70    3.22
  -7   8   1   18.98    7.76
   8   7   1   17.79    7.35
   8   6  -1   30.85    9.14
   6  -8  -1   29.49    7.81
   6  -8  -1   29.32    5.00
  -6   8  -1   29.67    7.63
  -6   8   1   33.56    8.33
   6  -8   1   25.67    7.25
  -8  -6   1   32.36    4.28
   8   6   1   34.23    8.35
  -8  -6   1   27.24    6.85
   5  -8  -1 1247.87   33.31
   8   5  -1 1341.64   41.90
   5  -8  -1 1255.20   39.40
   8   5  -1 1236.10   32.06
  -5   8  -1 1228.98   38.91
   5  -8   1 1280.18   37.13
  -8  -5   1 1225.92   37.76
  -5   8   1 1262.04   41.55
   8   5   1 1188.36   39.43
   5  -8   1 1322.97   39.49
   8   4  -1  466.22   16.13
  -4   8  -1  481.97   21.14
   8   4  -1  442.12   22.05
   4  -8  -1  486.18   16.78
   4  -8  -1  435.33   19.90
   8   4   1  470.84   21.15
  -4   8   1  467.57   22.77
  -8  -4   1  466.29   19.60
   4  -8   1  462.72   20.18
   4  -8   1  422.39   18.34
   8   3  -1  663.20   21.31
   3  -8  -1  715.06   24.87
   8   3  -1  655.67   26.57
   3  -8  -1  666.58   21.26
  -3   8  -1  677.23   25.71
   3  -8   1  652.09   23.55
   3  -8   1  654.83   23.92
   8   3   1  686.50   25.47
   8   3   1  688.95   23.24
  -8  -3   1  682.23   23.36
  -3   8   1  663.57   27.22
   8   2  -1  502.63   22.58
   2  -8  -1  498.77   17.81
   8   2  -1  511.64   18.36
  -2   8  -1  501.88   21.41
   2  -8  -1  465.05   19.32
  -2   8   1  519.64   23.04
   2  -8   1  484.94   18.81
   2  -8   1  515.86   19.78
   8   2   1  477.46   19.03
  -8  -2   1  503.64   18.30
   8   2   1  484.63   20.33
   1  -8  -1  289.89   14.62
   8   1  -1  320.86   14.75
   1  -8  -1  307.80   13.83
   8   1  -1  340.52   18.23
  -1   8  -1  325.76   17.58
   1  -8   1  320.52   13.78
   8   1   1  308.63   15.33
   1  -8   1  276.71   15.11
   8   1   1  287.96   15.59
  -1   8   1  261.02   16.44
   0   8  -1  711.78   21.01
   0   8  -1  675.72   25.85
   8   0  -1  673.34   26.53
   8   0  -1  670.36   23.90
   0  -8  -1  702.89   23.18
   0  -8  -1  701.82   22.50
   8   0   1  681.50   24.63
   8   0   1  721.84   25.05
   0  -8   1  695.21   21.00
   0   8   1  661.39   26.33
   0  -8   1  713.37   24.62
   1   8  -1  233.55   10.10
  -1  -8  -1  226.49   12.76
   8  -1  -1  236.45   14.02
   1   8  -1  222.17   14.62
  -1  -8  -1  235.25   11.38
   8  -1  -1  229.99   15.90
   8  -1   1  234.90   14.24
   1   8   1  201.96   14.72
  -1  -8   1  210.58    9.53
  -1  -8   1  231.88   13.60
   8  -1   1  246.25   14.53
   2   8  -1  173.80    7.42
   2   8  -1  160.29    8.43
   2   8  -1  179.31   15.62
   8  -2  -1  162.26   12.96
  -8   2  -1  157.09   12.12
  -2  -8  -1  148.60   11.40
  -2  -8  -1  159.56    9.14
   8  -2   1  191.94   13.78
  -8   2   1  146.19   14.69
  -2  -8   1  168.96    7.51
  -2  -8   1  175.92   12.36
   2   8   1  169.74   14.39
  -8   3  -1  115.84   11.54
  -3  -8  -1  131.66    8.32
   3   8  -1  118.97    6.97
  -3  -8  -1  119.97   11.35
   8  -3  -1  118.49   11.88
   3   8  -1  118.41   13.27
  -3  -8   1  107.12   10.74
   3   8   1  159.04   15.05
  -3  -8   1  126.98    5.41
   8  -3   1  137.98   13.04
  -8   3   1  146.44   14.86
   4   8  -1   14.11    3.07
  -8   4  -1   10.31    5.97
  -4  -8  -1   10.01    3.97
   8  -4  -1    7.41    6.97
   4   8  -1   15.54    7.08
  -4  -8  -1   11.26    5.98
   4   8   1   -1.80    5.99
   8  -4   1    2.89    5.83
  -8   4   1   -9.34    5.62
  -4  -8   1   -4.50    4.78
   5   8  -1   89.51   12.81
  -5  -8  -1  107.24   11.59
  -8   5  -1  110.82   11.60
   8  -5  -1  104.05   13.07
  -5  -8   1  110.93   11.81
   8  -5   1  100.75   11.64
   5   8   1  106.09   12.96
  -8   5   1   75.52   10.96
   6   8  -1  246.54   17.01
  -6  -8  -1  249.37   15.74
  -8   6  -1  262.62   15.85
   8  -6  -1  244.62   16.15
   6   8   1  239.37   16.77
  -8   6   1  240.88   17.56
   8  -6   1  224.91   16.72
  -6  -8   1  244.47   15.75
   8  -7  -1  755.83   30.06
  -7  -8  -1  743.44   28.99
  -8   7  -1  827.64   29.67
   7   8  -1  772.09   32.00
   7   8   1  825.66   32.35
  -7  -8   1  789.53   29.66
  -8   7   1  752.81   31.72
   8  -7   1  792.49   30.59
  -8  -8  -1 1182.20   39.18
   8   8  -1 1143.13   41.69
  -8  -8  -1 1132.25   28.14
  -8   8  -1 1181.11   39.22
   8  -8  -1 1240.50   41.07
   8   8   1 1236.40   42.04
  -8  -8   1 1203.07   39.15
  -8   8   1 1170.87   42.00
   8  -8   1 1150.26   39.91
  -9  -8  -1  498.21   23.63
   9   8  -1  488.72   25.32
  -8   9  -1  497.88   23.60
  -9  -8  -1  473.15   15.10
   8  -9  -1  478.78   23.96
  -9  -8   1  490.41   13.49
  -8   9   1  516.97   26.23
   9   8   1  487.09   25.55
  -9  -8   1  518.69   23.51
   8  -9   1  452.76   23.78
   7  -9  -1  167.85   15.98
  -7   9  -1  168.20   16.03
   9   7  -1  192.84   18.36
  -9  -7  -1  184.35    9.30
   7  -9   1  183.50   17.04
  -9  -7   1  175.03    8.86
  -7   9   1  173.21   17.21
   9   7   1  200.17   16.37
  -9  -7   1  162.54   13.11
  -6   9  -1  422.93   20.87
   6  -9  -1  437.15   21.56
   6  -9  -1  397.74   15.73
   9   6  -1  409.47   22.39
   9   6  -1  398.50   14.31
   6  -9   1  378.32   20.31
  -6   9   1  435.97   23.02
   6  -9   1  403.42   18.62
  -9  -6   1  448.56   20.58
   9   6   1  425.67   21.82
   9   5  -1   12.85    6.68
   5  -9  -1   22.01    4.98
  -5   9  -1   19.01    7.06
   5  -9  -1   11.00    7.14
   9   5  -1   11.84    4.10
   9   5   1   18.14    7.26
   5  -9   1   20.85    5.54
  -5   9   1   18.45    7.21
  -9  -5   1   25.65    6.77
   5  -9   1   14.97    6.70
   9   4  -1   44.34    9.50
   4  -9  -1   46.95    6.44
   9   4  -1   23.76    5.48
  -4   9  -1   30.99    7.90
   4  -9  -1   35.81    8.70
   9   4   1   37.88    8.58
  -9  -4   1   35.13    7.22
  -4   9   1   46.49   10.28
   4  -9   1   60.77    9.10
   4  -9   1   40.99    7.10
   9   3  -1    3.15    6.39
  -3   9  -1   -1.35    5.70
   9   3  -1    2.16    4.12
   3  -9  -1    1.96    5.76
   3  -9  -1   12.41    4.76
  -9  -3   1   11.66    5.61
   9   3   1   16.82    5.88
  -3   9   1   -5.75    6.46
   3  -9   1    4.72    5.32
   9   3   1    0.60    5.74
   3  -9   1    0.53    4.54
   2  -9  -1  251.94   14.43
   2  -9  -1  242.29   12.94
  -2   9  -1  247.72   16.44
   9   2  -1  242.07   17.01
   9   2  -1  239.29   13.06
  -2   9   1  230.33   16.25
  -9  -2   1  252.55   13.29
   9   2   1  255.70   15.64
   2  -9   1  230.88   14.04
   9   2   1  243.40   14.05
   2  -9   1  258.06   13.52
  -1   9  -1 1076.88   36.16
   1  -9  -1 1042.06   31.41
   9   1  -1 1033.73   32.35
   1  -9  -1 1057.44   32.03
   9   1  -1 1033.42   35.99
   9   1   1 1091.60   34.67
   1  -9   1 1035.46   30.47
   9   1   1 1058.20   33.22
  -1   9   1 1061.12   37.10
   1  -9   1 1039.82   33.32
   9   0  -1 1435.24   44.08
   0   9  -1 1379.41   35.86
   0  -9  -1 1423.52   37.93
   0   9  -1 1288.31   42.35
   9   0  -1 1313.77   39.62
   0  -9  -1 1407.03   39.01
   9   0   1 1335.66   40.83
   0  -9   1 1393.52   40.56
   9   0   1 1368.33   40.68
   0   9   1 1319.21   43.58
   0  -9   1 1336.15   35.82
   9  -1  -1  137.64   14.77
   9  -1  -1  133.77   12.98
   1   9  -1  149.48    9.19
  -1  -9  -1  153.62   11.94
   1   9  -1  148.72   15.31
  -1  -9  -1  157.83   10.25
   1   9   1  148.36   14.64
  -1  -9   1  143.11    8.51
   9  -1   1  163.76   12.98
   9  -1   1  164.42   13.18
  -1  -9   1  130.36   12.30
  -2  -9  -1  165.18   12.19
   2   9  -1  143.13    8.44
  -2  -9  -1  145.25    9.49
  -9   2  -1  159.65   14.18
   2   9  -1  145.38    7.76
   2   9  -1  104.80   12.44
   9  -2  -1  166.82   12.72
  -2  -9   1  146.65    7.53
  -2  -9   1  150.95   13.54
   9  -2   1  122.87   12.57
  -9   2   1  166.19   16.03
   2   9   1  130.95   13.66
  -9   3  -1  244.54   15.05
  -3  -9  -1  236.86   10.82
   9  -3  -1  246.69   16.29
   3   9  -1  203.08   15.85
   3   9  -1  213.63    9.07
  -3  -9  -1  183.66   13.80
  -9   3   1  186.13   15.33
  -3  -9   1  219.73    7.99
  -3  -9   1  223.08   14.80
   9  -3   1  208.05   15.50
   3   9   1  210.58   15.87
   9  -4  -1    5.46    6.92
   4   9  -1   10.33    2.87
  -4  -9  -1    7.23    5.42
   4   9  -1    7.05    7.32
  -4  -9  -1    3.47    3.57
  -9   4  -1    6.36    5.88
  -9   4   1    5.49    6.81
   4   9   1    0.83    6.90
  -4  -9   1    7.43    5.74
   9  -4   1    6.32    6.13
  -5  -9  -1  161.91   13.19
  -5  -9  -1  141.60    8.15
  -9   5  -1  148.07   13.80
   5   9  -1  149.26   15.58
   9  -5  -1  159.88   15.58
   5   9   1  158.45   16.94
  -9   5   1  117.34   13.67
   9  -5   1  125.31   13.50
  -5  -9   1  154.86   12.50
   6   9  -1  450.76   23.45
   9  -6  -1  444.13   22.75
  -9   6  -1  458.85   21.36
  -6  -9  -1  443.32   21.52
   9  -6   1  444.75   22.29
  -6  -9   1  465.43   21.61
   6   9   1  439.82   23.14
  -9   6   1  404.63   22.60
  -9   7  -1  888.62   32.72
   9  -7  -1  914.23   34.58
  -7  -9  -1  928.12   33.50
   7   9  -1  880.78   34.90
  -9   7   1  920.94   35.80
   7   9   1  915.40   35.60
   9  -7   1  851.64   34.17
  -7  -9   1  925.00   33.56
  -9   8  -1   77.99   11.54
   8   9  -1  108.21   14.48
   9  -8  -1  100.26   13.75
  -8  -9  -1   84.21   11.42
  -8  -9   1   90.54   11.93
   9  -8   1   77.78   12.20
   8   9   1   96.13   13.50
  -9   8   1  107.03   15.27
   9   9  -1  735.39   33.01
  -9  -9  -1  730.51   29.98
  -9   9  -1  693.24   29.40
   9  -9  -1  734.65   31.13
  -9  -9  -1  699.85   18.18
   9  -9   1  668.61   30.66
   9   9   1  744.92   32.03
  -9  -9   1  678.97   29.45
  -9   9   1  715.83   32.35
 -10  -9  -1  155.41   16.18
  10   9  -1  146.32   17.67
   9 -10  -1  136.99   15.50
  -9  10  -1  155.31   16.79
 -10  -9  -1  162.49    8.13
  -9  10   1  188.10   19.82
   9 -10   1  162.99   17.53
  10   9   1  182.70   19.59
 -10  -9   1  140.23   15.05
  10   8  -1   47.06   11.18
  -8  10  -1   59.16   10.73
 -10  -8  -1   77.29    7.26
   8 -10  -1   63.30   11.08
 -10  -8  -1   61.58   10.42
 -10  -8   1   73.83   11.39
  -8  10   1   32.63   10.28
 -10  -8   1   72.83    8.14
  10   8   1   55.66   11.15
   8 -10   1   66.10   11.10
  10   7  -1  216.10   17.34
  -7  10  -1  227.04   16.49
   7 -10  -1  219.14   16.35
   7 -10  -1  252.52   12.58
   7 -10   1  243.70   17.21
 -10  -7   1  251.02   16.77
  -7  10   1  246.11   18.55
  10   7   1  237.50   17.73
  10   6  -1   82.38   12.77
  10   6  -1  104.40    7.93
   6 -10  -1   85.45    8.63
  -6  10  -1   94.40   12.53
   6 -10  -1   85.06   11.44
 -10  -6   1  103.32   12.25
   6 -10   1   91.08   12.31
   6 -10   1  100.79   11.05
  10   6   1   76.79   11.73
  -6  10   1   93.19   13.91
  -5  10  -1  558.74   25.05
   5 -10  -1  544.70   19.96
  10   5  -1  542.34   19.10
   5 -10  -1  571.19   24.59
  10   5  -1  552.32   26.06
   5 -10   1  522.22   23.60
   5 -10   1  554.61   22.45
  10   5   1  546.81   25.14
 -10  -5   1  588.15   23.63
  -5  10   1  589.43   27.47
   4 -10  -1  267.84   16.24
   4 -10  -1  273.65   13.41
  10   4  -1  282.26   18.62
  -4  10  -1  261.98   17.17
  10   4  -1  275.94   13.35
  10   4   1  248.58   14.08
  -4  10   1  293.46   18.52
 -10  -4   1  285.15   15.69
  10   4   1  290.52   17.49
   4 -10   1  254.67   15.54
   4 -10   1  250.55   14.68
   3 -10  -1  375.75   16.22
   3 -10  -1  343.27   17.89
  -3  10  -1  348.35   19.97
  10   3  -1  352.30   20.84
  10   3  -1  378.85   16.38
   3 -10   1  393.86   17.82
  -3  10   1  353.53   20.88
   3 -10   1  370.93   17.81
  10   3   1  422.49   20.43
  10   3   1  343.57   16.86
 -10  -3   1  357.97   17.06
   2 -10  -1  224.62   13.30
  10   2  -1  282.92   14.35
  -2  10  -1  253.23   17.11
  10   2  -1  232.94   16.66
   2 -10  -1  251.20   14.65
  10   2   1  271.97   16.97
  10   2   1  256.95   14.68
   2 -10   1  260.03   14.99
   2 -10   1  257.15   14.09
  -2  10   1  268.32   18.37
 -10  -2   1  260.53   13.50
  10   1  -1   60.82   10.14
  10   1  -1   71.57    9.80
   1 -10  -1   90.00    9.69
   1 -10  -1   73.12    9.36
  -1  10  -1   73.82   10.58
   1 -10   1   79.43    8.52
   1 -10   1   62.07    9.30
  10   1   1   71.94   10.44
  -1  10   1   79.35   12.76
  10   1   1   97.95   11.27
  10   0  -1   66.13   11.28
   0 -10  -1   60.91    8.56
   0 -10  -1   56.31    7.69
   0  10  -1   84.47    8.51
  10   0  -1   59.84    9.28
   0  10  -1   43.79    9.20
  10   0   1   60.40    9.84
   0  10   1   70.56   11.60
   0 -10   1   53.61    8.70
  10   0   1   60.70    9.57
   0 -10   1   61.22    7.07
   1  10  -1  127.15   14.60
  -1 -10  -1   97.26   10.47
  10  -1  -1  114.46   12.52
   1  10  -1  102.58    8.14
  -1 -10  -1  112.79    9.98
  10  -1  -1   95.27   12.37
  -1 -10   1   87.93    7.24
  -1 -10   1   83.59   10.62
  10  -1   1  112.90   12.52
   1  10   1   94.98   12.54
  10  -1   1  103.75   12.67
 -10   2  -1  220.85   15.27
  -2 -10  -1  221.47   14.40
  -2 -10  -1  229.92   11.63
   2  10  -1  220.15   10.07
   2  10  -1  189.92   16.30
  10  -2  -1  191.65   14.03
  -2 -10   1  222.56   14.82
  10  -2   1  261.71   16.39
   2  10   1  190.04   15.72
 -10   2   1  193.64   16.55
  -2 -10   1  215.95    9.54
  -3 -10  -1  974.73   27.26
   3  10  -1  956.66   36.07
  10  -3  -1  953.02   34.21
   3  10  -1  964.69   24.54
  -3 -10  -1  973.23   32.89
 -10   3  -1  947.23   33.79
  -3 -10   1  959.65   24.23
 -10   3   1  909.58   36.05
  -3 -10   1  963.58   33.35
   3  10   1  933.39   35.69
  10  -3   1  967.79   34.34
   4  10  -1   43.02    9.83
  -4 -10  -1   29.38    7.56
  -4 -10  -1   47.86    5.84
   4  10  -1   41.60    3.66
  10  -4  -1   47.16    9.93
 -10   4  -1   19.66    7.34
   4  10   1   27.97    9.42
  10  -4   1   31.06    8.17
 -10   4   1   37.87   10.10
  -4 -10   1   30.16    7.34
  -5 -10  -1  139.80    8.11
  -5 -10  -1  148.08   14.07
 -10   5  -1  157.30   13.18
   5  10  -1  138.97   15.82
  10  -5  -1  138.83   14.36
  -5 -10   1  155.63   14.71
  10  -5   1  133.97   14.24
 -10   5   1  116.47   14.09
   5  10   1  133.93   15.52
 -10   6  -1  312.87   18.69
  -6 -10  -1  333.98   19.01
  -6 -10  -1  312.13   12.04
   6  10  -1  277.21   20.16
  10  -6  -1  298.18   19.08
 -10   6   1  363.33   21.51
   6  10   1  319.02   20.86
  10  -6   1  308.47   19.12
  -6 -10   1  280.83   17.97
   7  10  -1  184.22   18.78
  10  -7  -1  193.11   16.13
 -10   7  -1  206.01   15.86
  -7 -10  -1  223.41   15.68
  10  -7   1  266.16   18.53
  -7 -10   1  223.06   15.74
 -10   7   1  220.86   18.10
   7  10   1  237.35   18.31
 -10   8  -1  489.58   24.28
  10  -8  -1  483.23   26.03
  -8 -10  -1  526.53   25.35
   8  10  -1  549.68   28.22
  -8 -10   1  518.73   25.39
 -10   8   1  506.43   27.08
  10  -8   1  514.19   26.56
   8  10   1  519.36   27.61
   9  10  -1  112.26   16.24
  -9 -10  -1  124.20   14.64
 -10   9  -1  113.71   14.12
  10  -9  -1  123.19   15.30
   9  10   1  152.25   18.08
  10  -9   1  123.23   16.22
 -10   9   1  135.79   16.58
  -9 -10   1  110.67   14.48
 -10  10  -1   24.61    9.09
  10  10  -1   20.92   10.22
 -10 -10  -1   39.91   10.36
  10 -10  -1   34.17   10.43
  10  10   1   32.68   10.57
 -10  10   1   29.23   10.47
  10 -10   1   17.32    9.48
 -10 -10   1   43.24   10.34
 -11 -10  -1   72.48   12.89
 -10  11  -1   97.34   14.45
  10 -11  -1   95.76   16.08
 -11 -10  -1   86.38    6.23
  11  10  -1   67.64   14.30
 -11 -10   1   95.43   13.93
  10 -11   1   74.22   13.79
  11  10   1   63.96   12.85
 -10  11   1   72.54   13.36
  -9  11  -1   -1.05    6.35
 -11  -9  -1   -6.41    4.99
   9 -11  -1    4.21    6.87
  11   9  -1    7.13    7.68
 -11  -9  -1    0.52    4.15
  -9  11   1    5.96    8.01
 -11  -9   1   -0.98    6.21
   9 -11   1   14.65    8.12
  11   9   1   -2.50    7.18
 -11  -9   1    6.04    3.10
 -11  -8  -1  160.68    9.86
  -8  11  -1  191.06   17.90
 -11  -8  -1  163.08   15.93
   8 -11  -1  194.65   19.11
  11   8  -1  139.47   17.17
   8 -11   1  164.95   17.52
  11   8   1  184.66   20.32
  -8  11   1  130.64   16.33
 -11  -8   1  131.24   14.63
  -7  11  -1   80.03   12.11
   7 -11  -1  102.09    9.84
   7 -11  -1  115.99   15.18
  11   7  -1   91.88   13.91
  11   7   1   85.51   13.16
   7 -11   1  120.48   13.24
   7 -11   1   93.49   13.44
  -7  11   1   90.19   14.67
 -11  -7   1  101.35   13.25
  -6  11  -1  189.42   15.71
   6 -11  -1  192.22   16.05
   6 -11  -1  183.52   11.42
  11   6  -1  151.08   10.18
  11   6  -1  203.49   20.00
   6 -11   1  173.90   16.66
   6 -11   1  166.69   12.89
 -11  -6   1  231.94   15.76
  -6  11   1  189.87   19.37
  11   6   1  191.82   16.20
   5 -11  -1  609.29   22.03
   5 -11  -1  607.81   26.23
  11   5  -1  634.18   29.36
  -5  11  -1  644.76   27.95
  11   5  -1  580.91   21.18
   5 -11   1  616.58   26.00
   5 -11   1  563.56   24.02
 -11  -5   1  603.07   25.14
  -5  11   1  581.02   28.04
  11   5   1  619.10   27.88
   4 -11  -1  219.14   15.09
  11   4  -1  232.81   13.03
  -4  11  -1  201.25   16.60
  11   4  -1  267.15   18.75
   4 -11  -1  223.91   12.77
  -4  11   1  205.47   17.22
   4 -11   1  212.74   13.81
 -11  -4   1  235.08   14.98
   4 -11   1  234.36   15.12
  11   4   1  229.97   13.78
  11   4   1  218.62   16.04
  11   3  -1  335.49   16.11
  11   3  -1  330.26   20.53
   3 -11  -1  335.20   17.61
   3 -11  -1  309.94   15.52
  -3  11  -1  331.36   19.89
   3 -11   1  355.50   17.33
  -3  11   1  314.10   20.14
  11   3   1  319.72   16.55
 -11  -3   1  330.74   16.42
  11   3   1  301.63   18.49
   3 -11   1  298.81   16.54
  11   2  -1   45.64   10.25
  -2  11  -1   58.35   11.02
   2 -11  -1   55.59    8.80
   2 -11  -1   53.94    7.97
  11   2  -1   53.01    8.48
   2 -11   1   48.41    7.73
  -2  11   1   43.35    9.56
   2 -11   1   44.51    8.00
 -11  -2   1   47.99    7.58
  11   2   1   60.04    9.52
  11   2   1   58.27   10.21
  11   1  -1   72.09   11.28
  11   1  -1   72.96    9.78
  -1  11  -1   82.68   12.41
   1 -11  -1   94.26   10.35
   1 -11  -1   87.23    9.89
   1 -11   1   73.25   10.19
  11   1   1   77.59   11.25
  11   1   1   71.20   10.01
  -1  11   1   87.43   13.45
   1 -11   1   52.55    7.64
   0 -11  -1  699.27   24.40
   0  11  -1  735.11   30.17
   0  11  -1  691.67   22.60
  11   0  -1  653.57   29.67
  11   0  -1  678.98   26.53
   0 -11  -1  715.78   26.03
   0 -11   1  684.29   22.87
   0 -11   1  666.10   26.90
  11   0   1  727.21   27.79
  11   0   1  671.96   28.11
   0  11   1  733.90   31.28
  11  -1  -1   87.36   10.90
   1  11  -1   67.63   10.96
  11  -1  -1   79.78   11.92
   1  11  -1   94.75    7.93
  -1 -11  -1  113.04   10.15
  -1 -11  -1   66.21    9.27
  11  -1   1   93.46   11.99
  -1 -11   1   99.16   11.80
   1  11   1   93.78   13.23
  -1 -11   1   91.39    8.35
  11  -1   1   91.56   11.73
   2  11  -1  186.96    9.49
 -11   2  -1  185.54   15.24
  -2 -11  -1  157.53   12.97
  -2 -11  -1  173.89   10.66
  11  -2  -1  186.06   14.95
   2  11  -1  172.58   17.20
  11  -2   1  199.95   14.60
   2  11   1  188.57   18.46
 -11   2   1  207.40   19.71
  -2 -11   1  176.23   14.10
  -2 -11   1  183.39    9.34
  11  -3  -1  919.49   33.81
  -3 -11  -1  908.51   26.95
  -3 -11  -1  874.54   32.30
 -11   3  -1  953.14   34.56
   3  11  -1  895.02   23.86
   3  11  -1  946.17   36.39
  11  -3   1  980.88   35.02
  -3 -11   1  932.04   24.19
  -3 -11   1  918.65   33.20
   3  11   1  968.02   37.18
 -11   3   1  815.00   35.32
  -4 -11  -1  245.42   15.73
  -4 -11  -1  223.88   10.77
  11  -4  -1  250.97   16.93
   4  11  -1  213.93   18.10
 -11   4  -1  217.48   15.87
  -4 -11   1  201.65    7.62
 -11   4   1  212.96   17.70
  11  -4   1  250.61   17.34
   4  11   1  212.20   17.45
  -4 -11   1  216.13   15.29
  11  -5  -1  120.19   14.98
 -11   5  -1   77.02   11.65
   5  11  -1  114.83   16.03
  -5 -11  -1   94.70    7.24
  -5 -11  -1   98.67   12.93
 -11   5   1  128.44   16.30
  -5 -11   1  115.47   13.49
  11  -5   1  108.86   13.98
   5  11   1  108.06   14.97
  -6 -11  -1   38.29    9.38
 -11   6  -1   22.19    7.50
  11  -6  -1   24.45    9.50
  -6 -11  -1   39.90    5.12
   6  11  -1   25.40    8.72
  -6 -11   1   43.35    9.30
 -11   6   1   16.62    7.71
  11  -6   1   36.81    9.48
   6  11   1   30.16    9.27
  -7 -11  -1    7.12    6.86
  -7 -11  -1    9.42    3.79
 -11   7  -1   10.00    6.57
  11  -7  -1    8.01    6.73
   7  11  -1    8.03    7.80
  -7 -11   1   10.91    7.30
  11  -7   1    5.92    7.42
 -11   7   1   11.75    7.71
   7  11   1    2.86    6.92
   8  11  -1  200.73   20.31
 -11   8  -1  198.55   16.82
  11  -8  -1  196.69   20.14
  -8 -11  -1  169.11   17.46
 -11   8   1  172.68   19.07
  -8 -11   1  208.11   16.37
  11  -8   1  197.51   20.04
   8  11   1  192.23   19.52
  -9 -11  -1  136.96   15.63
 -11   9  -1  160.73   17.56
  11  -9  -1  153.35   17.70
   9  11  -1  139.30   17.49
  11  -9   1  134.41   16.61
 -11   9   1  220.09   22.36
  -9 -11   1  167.65   17.07
   9  11   1  139.36   18.34
 -10 -11  -1  212.63   17.52
  10  11  -1  194.07   21.91
  11 -10  -1  191.14   20.66
 -11  10  -1  159.54   17.41
 -10 -11   1  168.93   18.16
 -11  10   1  179.67   20.65
  11 -10   1  218.46   21.65
  10  11   1  247.32   23.57
  11  11  -1   54.95   13.78
 -11  11  -1   70.68   12.80
  11 -11  -1   64.16   13.51
 -11 -11  -1   53.59   12.44
 -11  11   1   66.89   14.24
  11  11   1   62.52   14.35
  11 -11   1   77.25   14.43
 -11 -11   1   58.28   12.14
  11 -12  -1  188.77   21.05
  12  11  -1  239.29   24.27
 -11  12  -1  203.04   20.59
 -12 -11  -1  182.48   19.29
 -11  12   1  236.69   24.54
  11 -12   1  257.57   24.95
  12  11   1  215.87   23.75
 -12 -11   1  201.16   20.07
 -10  12  -1   56.48   12.34
 -12 -10  -1   87.35    7.50
  12  10  -1   81.42   15.22
 -12 -10  -1   73.14   13.43
  10 -12  -1   51.28   13.20
 -12 -10   1   60.92   12.38
  12  10   1   69.74   14.25
  10 -12   1   54.35   13.10
 -10  12   1   50.19   12.29
   9 -12  -1  204.16   21.00
  12   9  -1  163.15   20.25
  -9  12  -1  163.81   18.06
 -12  -9  -1  165.95   17.63
 -12  -9  -1  176.74   10.61
  12   9   1  217.93   22.56
 -12  -9   1  175.71   17.60
   9 -12   1  227.09   21.93
  -9  12   1  211.80   21.87
   8 -12  -1   26.12    8.99
  12   8  -1   36.17   11.10
 -12  -8  -1   34.50    9.65
  -8  12  -1   44.17   11.02
 -12  -8   1   28.75    9.06
  12   8   1   54.25   12.36
   8 -12   1   39.21   10.36
  -8  12   1   37.73   10.90
   7 -12  -1  239.46   14.06
   7 -12  -1  254.46   19.01
  12   7  -1  284.74   20.83
  -7  12  -1  297.25   20.13
   7 -12   1  279.98   18.77
   7 -12   1  251.39   16.54
  12   7   1  255.01   19.83
  -7  12   1  209.33   21.07
 -12  -7   1  255.65   17.95
  -6  12  -1  884.48   35.45
  12   6  -1  854.03   36.28
   6 -12  -1  864.13   28.77
   6 -12  -1  793.05   33.31
  12   6  -1  874.25   27.53
   6 -12   1  826.22   33.16
 -12  -6   1  843.98   32.64
   6 -12   1  858.56   31.75
  -6  12   1  852.21   36.79
  12   6   1  876.02   36.02
  12   5  -1   50.82   10.98
  12   5  -1   60.88    8.34
   5 -12  -1   59.28   10.77
   5 -12  -1   45.33    7.50
  -5  12  -1   42.90   10.45
  12   5   1   44.63   10.20
 -12  -5   1   34.60    8.38
   5 -12   1   44.98    9.31
   5 -12   1   37.11    7.89
  -5  12   1   41.52    9.87
  12   4  -1  560.00   28.51
  12   4  -1  535.77   21.78
   4 -12  -1  563.83   24.92
  -4  12  -1  595.93   27.74
   4 -12  -1  582.88   22.48
  12   4   1  619.80   27.86
  12   4   1  563.98   23.25
 -12  -4   1  519.40   23.58
  -4  12   1  562.52   28.78
   4 -12   1  570.14   24.38
   4 -12   1  546.80   24.13
   3 -12  -1  157.08   11.96
  -3  12  -1  157.86   17.00
  12   3  -1  161.71   17.90
  12   3  -1  192.48   12.68
   3 -12  -1  157.24   13.17
  -3  12   1  130.11   16.06
   3 -12   1  174.45   13.18
 -12  -3   1  130.07   12.31
  12   3   1  158.55   12.86
  12   3   1  175.75   17.32
   3 -12   1  171.99   12.92
  -2  12  -1    7.27    7.36
  12   2  -1    1.80    5.19
   2 -12  -1    3.01    5.00
  12   2  -1   12.68    8.06
   2 -12  -1   -1.27    5.13
  12   2   1    4.36    5.84
  12   2   1    7.74    6.44
   2 -12   1   10.01    5.64
  -2  12   1   28.41    9.44
 -12  -2   1   12.77    5.14
   2 -12   1   21.40    6.61
   1 -12  -1  129.71   12.59
  -1  12  -1  142.42   16.33
  12   1  -1  109.28   12.47
  12   1  -1  103.39   13.84
   1 -12  -1  116.40   11.75
   1 -12   1  134.89   10.50
  12   1   1  158.28   16.23
  -1  12   1  114.29   14.84
   1 -12   1  127.55   13.99
  12   1   1  126.39   13.57
   0  12  -1   14.89    8.26
  12   0  -1   27.37    8.48
   0 -12  -1   17.87    6.24
   0 -12  -1   15.59    5.62
   0  12  -1   22.74    6.02
  12   0  -1    6.86    6.16
   0 -12   1    9.65    4.72
   0 -12   1    5.24    5.26
  12   0   1   13.47    6.61
   0  12   1   20.01    8.84
  12   0   1   19.45    7.31
   1  12  -1  430.49   16.15
  -1 -12  -1  457.60   21.32
  12  -1  -1  461.12   25.14
  12  -1  -1  441.10   21.91
  -1 -12  -1  454.59   18.43
   1  12  -1  444.52   24.64
  -1 -12   1  440.77   16.78
  -1 -12   1  416.53   21.59
   1  12   1  418.08   24.61
  12  -1   1  431.56   22.27
  12  -1   1  447.77   23.22
 -12   2  -1  693.25   29.82
   2  12  -1  649.18   30.68
  -2 -12  -1  695.65   27.82
  12  -2  -1  725.19   29.54
   2  12  -1  678.96   20.79
  -2 -12  -1  693.66   23.50
   2  12   1  735.33   32.52
  -2 -12   1  725.80   29.10
  12  -2   1  712.17   29.39
 -12   2   1  664.25   31.54
  -2 -12   1  689.07   21.33
  -3 -12  -1  494.83   23.42
  12  -3  -1  508.48   24.90
  -3 -12  -1  485.49   18.16
 -12   3  -1  447.73   23.99
   3  12  -1  506.97   26.82
   3  12  -1  467.33   15.05
  -3 -12   1  489.90   23.96
   3  12   1  480.74   26.28
  12  -3   1  505.38   24.92
 -12   3   1  489.52   26.77
  -3 -12   1  488.20   15.66
  12  -4  -1  944.14   36.08
 -12   4  -1  942.70   35.75
   4  12  -1  943.86   38.67
  -4 -12  -1  947.30   34.81
  -4 -12  -1  924.80   27.28
  12  -4   1  967.05   36.80
  -4 -12   1  961.18   23.71
 -12   4   1  914.91   38.24
  -4 -12   1  975.58   35.83
   4  12   1  864.64   37.51
   5  12  -1  127.64   15.83
  -5 -12  -1  141.71    8.74
 -12   5  -1  119.99   14.35
  12  -5  -1  159.02   17.04
  -5 -12  -1  135.30   15.30
  12  -5   1  162.90   18.07
 -12   5   1   79.48   13.41
   5  12   1  149.96   17.39
  -5 -12   1  164.74   16.46
  -6 -12  -1  175.70   17.53
  12  -6  -1  141.93   16.97
   6  12  -1  123.70   15.87
 -12   6  -1  159.15   16.58
  -6 -12  -1  149.22    8.64
   6  12   1  163.71   18.22
 -12   6   1  139.45   17.02
  12  -6   1  165.08   18.06
  -6 -12   1  143.83   15.53
 -12   7  -1   10.05    7.18
  -7 -12  -1    2.34    3.52
   7  12  -1   -0.03    6.87
  12  -7  -1   -9.79    5.99
  -7 -12  -1   12.65    7.26
  -7 -12   1   -1.99    5.16
 -12   7   1    0.73    6.93
  12  -7   1    0.71    6.65
   7  12   1   -0.67    7.69
  -8 -12  -1  107.56    7.32
  12  -8  -1  138.17   17.47
   8  12  -1  132.97   17.39
 -12   8  -1  147.80   17.05
  -8 -12  -1  107.70   14.64
  12  -8   1   79.50   13.77
 -12   8   1  117.06   16.85
   8  12   1  124.05   16.64
  -8 -12   1  118.42   15.40
  -9 -12  -1   99.71    7.80
 -12   9  -1   82.88   13.91
   9  12  -1  109.76   16.64
  12  -9  -1  106.57   16.00
  -9 -12  -1  105.03   15.00
  12  -9   1   73.96   13.98
  -9 -12   1   84.29   13.42
   9  12   1  112.67   18.07
 -12   9   1  103.46   17.17
  10  12  -1  239.59   24.99
 -10 -12  -1  210.55   20.98
  12 -10  -1  196.22   20.61
 -12  10  -1  203.47   19.97
  12 -10   1  193.53   21.65
 -10 -12   1  254.41   23.08
  10  12   1  227.60   23.56
 -12  10   1  245.15   24.40
  11  12  -1  270.21   26.51
  12 -11  -1  237.48   24.12
 -11 -12  -1  266.84   20.77
 -12  11  -1  241.46   20.68
  12 -11   1  290.88   26.87
  11  12   1  216.00   22.80
 -11 -12   1  271.08   21.25
 -12  11   1  218.49   22.87
  12 -12  -1   88.22   15.42
 -12  12  -1   87.23   15.41
  12  12  -1   70.86   15.39
 -12 -12  -1   74.02   14.70
 -12 -12   1  105.54   16.00
  12  12   1   98.73   18.49
 -12  12   1  108.34   17.52
  12 -12   1  101.16   16.64
  13  12  -1   42.56   14.73
 -13 -12  -1   38.72   12.08
  12 -13  -1   38.58   12.32
 -12  13  -1   61.86   13.44
  12 -13   1   57.32   13.76
 -12  13   1   39.44   12.78
 -13 -12   1   43.42   12.88
  13  12   1   50.69   14.51
 -13 -11  -1   41.08   11.57
  13  11  -1   62.42   15.26
 -11  13  -1   42.82   12.02
  11 -13  -1   39.36   11.27
 -13 -11   1   61.90   13.48
 -11  13   1   45.27   13.23
  13  11   1   10.52   10.54
  11 -13   1   46.05   12.27
  10 -13  -1   82.76   14.79
 -13 -10  -1  109.58   10.25
 -13 -10  -1   90.09   14.35
 -10  13  -1   61.44   12.87
  13  10  -1   97.47   16.79
 -13 -10   1   67.60   12.58
  13  10   1   75.93   15.26
  10 -13   1   88.73   15.53
 -10  13   1  108.04   16.79
  -9  13  -1    3.76    7.72
   9 -13  -1    8.45    9.10
  13   9  -1   -2.65    9.10
 -13  -9  -1    9.97    8.27
 -13  -9  -1   14.00    5.74
  13   9   1   17.99   10.14
   9 -13   1   17.45   10.20
 -13  -9   1   10.24    8.24
  -9  13   1    2.87    8.56
  13   8  -1  119.19   17.35
  -8  13  -1  118.03   15.86
 -13  -8  -1  118.83   14.77
   8 -13  -1  119.83   12.05
   8 -13  -1  136.74   17.91
  -8  13   1   98.37   16.48
 -13  -8   1  109.90   14.72
   8 -13   1  131.09   17.08
  13   8   1  122.30   16.46
  13   7  -1  315.52   23.59
   7 -13  -1  309.90   16.43
  -7  13  -1  348.54   22.84
   7 -13  -1  298.63   21.21
   7 -13   1  338.09   21.32
  -7  13   1  309.92   23.15
  13   7   1  357.87   23.79
   7 -13   1  318.20   19.05
 -13  -7   1  313.81   20.40
  -6  13  -1  175.93   18.84
  13   6  -1  213.74   21.37
  13   6  -1  176.01   11.89
   6 -13  -1  161.37   12.14
   6 -13  -1  148.32   16.35
  -6  13   1  196.30   21.70
   6 -13   1  178.25   17.70
 -13  -6   1  144.29   15.13
   6 -13   1  162.08   15.50
  13   6   1  214.65   21.27
   5 -13  -1  287.15   19.20
   5 -13  -1  298.83   16.02
  -5  13  -1  258.21   20.19
  13   5  -1  282.35   21.69
  13   5  -1  262.18   14.93
   5 -13   1  287.46   17.62
  -5  13   1  288.33   21.88
 -13  -5   1  306.97   18.38
  13   5   1  255.95   19.72
   5 -13   1  284.49   18.26
  -4  13  -1  186.04   19.13
   4 -13  -1  195.73   15.42
   4 -13  -1  203.35   13.58
  13   4  -1  169.02   18.12
  13   4  -1  184.31   13.01
  13   4   1  203.51   14.47
  -4  13   1  216.24   21.28
   4 -13   1  178.37   14.92
  13   4   1  177.03   18.25
   4 -13   1  190.36   14.92
 -13  -4   1  166.59   15.25
  -3  13  -1   40.17   10.71
   3 -13  -1   55.45    9.71
   3 -13  -1   34.07    7.69
  13   3  -1   49.91    8.89
  13   3  -1   45.06   11.21
  13   3   1   43.84   10.40
   3 -13   1   55.09    9.61
  -3  13   1   25.29   10.29
   3 -13   1   54.62    9.61
  13   3   1   44.49    9.13
 -13  -3   1   43.79    8.31
   2 -13  -1  117.81   12.48
  13   2  -1  106.06   15.17
   2 -13  -1  101.16   12.16
  13   2  -1  116.20   13.13
  -2  13  -1  119.63   16.10
  13   2   1  122.10   15.00
   2 -13   1  174.72   12.86
 -13  -2   1  122.58   11.98
  13   2   1  148.68   15.02
  -2  13   1  130.72   16.95
   2 -13   1  140.32   14.69
  -1  13  -1   12.27    5.90
  -1  13  -1   10.99    7.23
   1 -13  -1   10.67    6.09
  13   1  -1    5.32    6.58
  13   1  -1   14.22    6.69
   1 -13  -1   23.75    7.03
   1 -13   1   11.46    5.54
  13   1   1   29.39    8.12
  -1  13   1   15.56    9.41
   1 -13   1   16.39    6.58
  13   1   1    5.49    6.44
   0  13  -1  121.68   11.05
   0 -13  -1  133.64   13.54
   0  13  -1  129.91   16.23
   0 -13  -1  117.05   11.82
  13   0  -1  145.16   18.26
  13   0  -1  127.51   14.38
   0 -13   1  129.41   14.13
   0 -13   1  112.44   10.73
  13   0   1  112.45   13.50
  13   0   1  130.94   15.48
   0  13   1  100.34   14.50
   1  13  -1   26.03    9.59
  -1 -13  -1   43.22    7.37
  13  -1  -1   26.37    8.28
  13  -1  -1   23.55    8.55
  -1 -13  -1   32.42    8.21
   1  13  -1   31.44    6.10
  -1 -13   1   31.94    8.76
  -1 -13   1   39.65    6.35
  13  -1   1   35.59    8.47
   1  13   1   38.90   11.23
  13  -1   1   26.12    8.72
   2  13  -1  608.44   19.57
  -2 -13  -1  612.00   26.96
 -13   2  -1  611.60   28.94
  13  -2  -1  595.12   27.34
   2  13  -1  614.98   30.96
  -2 -13  -1  639.16   22.50
  13  -2   1  560.59   27.82
   2  13   1  627.54   31.19
  -2 -13   1  655.87   28.48
 -13   2   1  664.20   31.94
  -2 -13   1  617.34   20.44
  -3 -13  -1  880.45   27.20
 -13   3  -1  846.87   35.19
  13  -3  -1  850.08   34.95
   3  13  -1  862.25   23.39
   3  13  -1  851.68   37.07
  -3 -13  -1  858.80   33.36
  13  -3   1  856.44   35.14
  -3 -13   1  845.01   34.05
   3  13   1  864.09   37.73
 -13   3   1  843.20   37.36
  -3 -13   1  873.30   24.43
   4  13  -1  139.93   17.35
 -13   4  -1  149.03   16.69
  -4 -13  -1  142.40    9.86
  13  -4  -1  137.13   16.68
  -4 -13  -1  140.29   15.50
   4  13   1  126.03   17.60
 -13   4   1  133.37   17.39
  13  -4   1  161.96   18.03
  -4 -13   1  128.62    6.96
  -4 -13   1  117.54   14.62
 -13   5  -1  482.08   25.09
   5  13  -1  452.19   26.95
  13  -5  -1  484.29   26.52
  -5 -13  -1  452.15   16.55
  -5 -13  -1  444.19   24.17
 -13   5   1  411.57   25.85
  -5 -13   1  489.01   25.43
   5  13   1  420.08   26.14
  13  -5   1  453.53   25.51
  -6 -13  -1   80.07    7.54
 -13   6  -1   60.01   11.52
   6  13  -1   46.46   12.42
  13  -6  -1   68.70   14.05
  -6 -13  -1   76.02   12.63
  13  -6   1   57.12   11.73
  -6 -13   1   85.56   13.52
   6  13   1   75.12   15.06
 -13   6   1   62.75   13.57
 -13   7  -1  737.30   33.33
  13  -7  -1  766.05   35.33
  -7 -13  -1  756.69   21.98
   7  13  -1  721.40   36.27
  -7 -13  -1  818.58   34.41
 -13   7   1  691.27   34.70
   7  13   1  686.67   35.83
  -7 -13   1  782.51   34.09
  13  -7   1  764.90   35.55
 -13   8  -1  199.62   20.69
   8  13  -1  211.51   22.68
  -8 -13  -1  180.39    9.34
  -8 -13  -1  199.72   20.06
  13  -8  -1  216.92   21.38
   8  13   1  164.35   20.15
  13  -8   1  207.91   21.83
 -13   8   1  192.54   21.23
  -8 -13   1  218.50   21.27
  13  -9  -1   21.47    9.54
   9  13  -1   27.81   10.62
  -9 -13  -1   21.83    9.70
 -13   9  -1   20.05    9.09
  -9 -13  -1   33.06    4.91
  -9 -13   1   26.44    9.91
   9  13   1   11.82   10.57
  13  -9   1   35.78   11.75
 -13   9   1   23.06   10.97
 -13  10  -1   47.58   12.12
 -10 -13  -1   54.75   12.08
 -10 -13  -1   47.17    7.09
  13 -10  -1   49.86   12.92
  10  13  -1   27.40   11.73
  13 -10   1   62.11   13.32
 -10 -13   1   49.67   11.91
  10  13   1   40.56   13.19
 -13  10   1   42.76   12.36
 -11 -13  -1  389.92   26.04
 -13  11  -1  356.37   24.52
  13 -11  -1  380.06   27.29
  11  13  -1  357.74   27.27
 -11 -13   1  357.19   24.84
  11  13   1  337.01   27.12
 -13  11   1  370.23   27.20
  13 -11   1  365.48   26.83
 -13  12  -1   61.90   13.54
  13 -12  -1   57.69   15.01
  12  13  -1   64.43   16.34
 -12 -13  -1   59.21   14.36
  12  13   1   65.51   14.56
  13 -12   1   48.03   13.32
 -12 -13   1   42.53   11.91
 -13  12   1   57.38   14.72
 -13  13  -1   90.15   15.51
  13 -13  -1   93.49   16.72
 -13 -13  -1   94.12   16.61
  13  13  -1   78.52   16.55
 -13 -13   1   94.01   16.21
  13 -13   1  109.48   18.17
 -13  13   1  101.03   17.79
  13  13   1   90.46   18.02
  13 -14  -1  163.98   22.44
 -13  14  -1  166.65   21.36
 -14 -13  -1  147.42   20.40
  14  13  -1  175.77   24.65
 -14 -13   1  125.47   19.05
  14  13   1  132.51   19.94
 -13  14   1  113.90   19.86
  13 -14   1  172.56   22.57
  14  12  -1   -2.06    8.41
 -14 -12  -1   -3.00    8.35
  12 -14  -1   10.55   10.04
 -12  14  -1   -0.80    8.63
 -14 -12   1    3.53    8.38
  14  12   1   14.41   10.36
 -12  14   1   13.95   10.42
  12 -14   1    6.61   10.42
  14  11  -1  127.56   19.73
 -11  14  -1  101.95   16.58
  11 -14  -1  130.08   19.57
 -14 -11  -1  119.10   17.73
 -14 -11   1   75.41   14.28
 -11  14   1  120.97   19.78
  14  11   1  142.61   20.33
  11 -14   1  103.65   17.57
  10 -14  -1  314.58   25.09
  14  10  -1  312.20   26.64
 -14 -10  -1  331.08   24.15
 -10  14  -1  322.59   24.19
 -10  14   1  310.05   25.04
 -14 -10   1  338.14   23.87
  10 -14   1  372.64   24.91
  14  10   1  361.82   27.01
 -14  -9  -1  274.96   21.43
  -9  14  -1  267.80   21.87
 -14  -9  -1  260.04   14.51
   9 -14  -1  276.66   25.45
  14   9  -1  239.97   25.29
  -9  14   1  252.96   25.17
  14   9   1  303.37   24.20
 -14  -9   1  247.50   20.54
   9 -14   1  280.69   22.53
 -14  -8  -1  107.08   15.09
  14   8  -1   70.43   15.82
   8 -14  -1  120.24   17.28
  -8  14  -1  113.86   17.24
   8 -14  -1  110.39   11.94
   8 -14   1   88.14   15.12
 -14  -8   1  108.44   14.72
  14   8   1   88.79   14.71
  -8  14   1  107.90   17.24
   7 -14  -1   66.61    9.77
   7 -14  -1   42.84   11.92
  -7  14  -1   68.81   13.83
  14   7  -1   57.26   14.51
   7 -14   1   58.74   11.92
  14   7   1   89.03   15.42
   7 -14   1   70.00   11.21
  -7  14   1   65.86   13.56
 -14  -7   1   88.30   13.21
  14   6  -1  102.59   16.34
  14   6  -1   70.54    9.71
   6 -14  -1   71.88    9.79
  -6  14  -1   49.98   12.00
   6 -14  -1   90.34   14.28
  -6  14   1   66.30   13.75
   6 -14   1   59.91   11.54
   6 -14   1   78.21   11.74
 -14  -6   1   79.52   12.04
  14   6   1   63.21   13.28
   5 -14  -1   -0.98    4.30
   5 -14  -1    0.26    6.79
  14   5  -1    5.19    5.25
  -5  14  -1  -10.88    6.17
  14   5  -1    8.29    8.83
  14   5   1    0.71    6.28
   5 -14   1   -1.63    4.97
 -14  -5   1    2.61    5.37
  -5  14   1    6.01    8.40
   5 -14   1    0.94    6.05
   4 -14  -1   53.49    9.14
  14   4  -1   66.75   13.77
   4 -14  -1   64.93   11.85
  14   4  -1   84.69   10.82
  -4  14  -1   74.78   13.63
  14   4   1   69.12   10.76
   4 -14   1   63.51   10.99
 -14  -4   1   68.58   10.72
  -4  14   1   91.27   16.20
  14   4   1   81.52   13.84
   4 -14   1   74.98   11.60
   3 -14  -1   58.61   10.32
  14   3  -1   71.24   13.59
  14   3  -1   75.84   10.71
  -3  14  -1   56.30   12.60
   3 -14  -1   57.53    9.65
  -3  14   1   70.29   14.92
 -14  -3   1   80.84   10.87
  14   3   1   79.16   13.68
  14   3   1   61.93   10.74
   3 -14   1   72.40   10.87
   3 -14   1   64.77   10.79
   2 -14  -1  341.90   19.09
   2 -14  -1  331.25   19.06
  14   2  -1  337.23   23.38
  14   2  -1  338.63   18.84
  -2  14  -1  319.80   22.90
  14   2   1  295.59   19.21
   2 -14   1  348.73   18.26
  14   2   1  316.32   21.48
  -2  14   1  333.97   23.42
 -14  -2   1  313.09   17.69
   2 -14   1  321.60   19.70
   1 -14  -1  478.31   23.18
  -1  14  -1  437.34   26.99
  14   1  -1  484.70   27.53
  -1  14  -1  455.69   19.91
   1 -14  -1  438.40   21.15
  14   1  -1  493.48   24.27
   1 -14   1  515.38   21.36
  14   1   1  443.54   23.80
   1 -14   1  504.27   24.68
  14   1   1  478.92   25.90
   0 -14  -1   52.94    8.97
  14   0  -1   44.82   12.03
   0  14  -1    5.60    7.50
  14   0  -1   49.15   10.14
   0  14  -1   58.28    8.52
   0 -14  -1   33.77    8.42
  14   0   1   67.14   12.48
   0 -14   1   44.00    9.62
   0  14   1   32.94   11.31
   0 -14   1   55.11    8.26
  14   0   1   44.58   10.35
  -1 -14  -1  213.72   16.03
   1  14  -1  207.57   20.85
  -1 -14  -1  234.63   14.11
  14  -1  -1  204.95   16.97
   1  14  -1  218.91   12.11
  14  -1  -1  238.62   24.28
  -1 -14   1  222.06   12.38
  14  -1   1  227.28   18.60
  -1 -14   1  240.65   17.82
  14  -1   1  187.03   18.16
   1  14   1  220.21   22.38
  -2 -14  -1   65.78    8.97
  -2 -14  -1   48.59    9.71
   2  14  -1   45.60   11.13
  14  -2  -1   41.69   10.16
   2  14  -1   69.91    7.52
 -14   2  -1   66.80   12.60
   2  14   1   46.80   11.66
  14  -2   1   45.55   10.19
  -2 -14   1   55.74   10.75
 -14   2   1   42.50   11.25
  -2 -14   1   59.17    7.50
 -14   3  -1   75.07   13.28
  -3 -14  -1   39.22    9.71
   3  14  -1   52.98   12.29
  -3 -14  -1   79.56    9.31
  14  -3  -1   52.72   11.65
   3  14  -1   87.50    7.23
   3  14   1   45.02   12.09
  -3 -14   1   67.37   11.84
 -14   3   1   51.87   12.09
  -3 -14   1   78.49    7.44
  14  -3   1   75.10   13.60
   4  14  -1  436.81   27.96
  -4 -14  -1  422.72   23.76
  -4 -14  -1  429.35   17.35
  14  -4  -1  450.52   26.05
 -14   4  -1  489.11   26.40
   4  14   1  446.81   27.73
  14  -4   1  430.58   25.91
  -4 -14   1  469.00   25.51
  -4 -14   1  427.46   14.15
 -14   4   1  415.65   26.87
   5  14  -1  183.49   21.09
  -5 -14  -1  184.46   10.94
  14  -5  -1  209.32   21.62
  -5 -14  -1  208.74   20.22
 -14   5  -1  217.91   21.05
  14  -5   1  223.13   22.09
   5  14   1  213.66   22.42
  -5 -14   1  190.89   19.28
 -14   5   1  219.79   23.00
 -14   6  -1  152.17   18.33
   6  14  -1  138.79   19.07
  -6 -14  -1  124.54    8.95
  14  -6  -1  136.11   18.07
  -6 -14  -1  126.14   16.40
 -14   6   1  132.88   18.09
  14  -6   1  144.60   19.44
  -6 -14   1  142.84   17.68
   6  14   1  124.94   18.85
 -14   7  -1  165.27   18.77
  -7 -14  -1  130.67   16.77
   7  14  -1  141.41   19.29
  14  -7  -1  159.87   20.28
  -7 -14  -1  159.40    9.01
   7  14   1  157.07   20.33
  14  -7   1  186.36   21.02
  -7 -14   1  141.91   17.89
 -14   7   1  155.85   19.75
  -8 -14  -1   31.91    4.90
 -14   8  -1   39.50   11.28
   8  14  -1   20.02   11.70
  -8 -14  -1   23.12    9.41
  14  -8  -1   10.30    9.41
   8  14   1   26.80   11.79
 -14   8   1   27.38   11.40
  14  -8   1   22.41   11.93
  -8 -14   1   22.39    9.23
  -9 -14  -1   -1.48    8.13
  14  -9  -1   -0.51    9.60
 -14   9  -1    8.62    8.59
   9  14  -1   11.96   10.98
 -14   9   1   -9.45    7.47
   9  14   1   -7.44    9.89
  14  -9   1    0.72    8.57
  -9 -14   1    1.01    7.89
 -14  10  -1  212.79   21.76
 -10 -14  -1  208.46   22.60
  14 -10  -1  210.21   24.19
  10  14  -1  199.92   23.93
 -10 -14   1  197.50   21.10
 -14  10   1  283.55   27.62
  14 -10   1  264.88   26.27
  10  14   1  250.51   26.24
 -14  11  -1   96.51   16.33
  11  14  -1  153.49   21.85
 -11 -14  -1  147.82   19.56
  14 -11  -1  117.62   18.22
  14 -11   1  123.53   18.36
 -11 -14   1  122.19   17.53
  11  14   1   98.13   17.25
 -14  11   1   94.97   17.44
 -12 -14  -1  259.91   25.23
  12  14  -1  294.56   29.54
  14 -12  -1  285.46   29.10
 -14  12  -1  297.36   23.84
 -12 -14   1  296.55   23.90
  14 -12   1  254.40   26.16
 -14  12   1  227.84   25.26
  12  14   1  276.73   28.47
  14 -13  -1  149.97   21.44
 -13 -14  -1  166.84   21.57
  13  14  -1  140.69   21.73
 -14  13  -1  168.71   20.79
 -13 -14   1  104.11   16.84
  14 -13   1  164.10   22.43
  13  14   1  127.50   20.89
 -14  13   1  163.04   22.15
  14  14  -1  -15.70    7.41
 -14 -14  -1  -13.90    7.78
  14 -14  -1   10.49   10.57
 -14  14  -1   -0.35    8.07
 -14  14   1   16.76   10.91
  14  14   1   -2.28    9.73
  14 -14   1    2.81   10.71
 -14 -14   1    1.90    8.42
  15  14  -1   28.73   13.15
  14 -15  -1   42.43   15.22
 -14  15  -1   23.99   11.59
 -15 -14  -1   58.27   15.36
  15  14   1   84.54   18.90
  14 -15   1   72.61   17.64
 -14  15   1   38.79   13.39
 -15 -14   1   42.29   13.14
  13 -15  -1   42.32   15.10
  15  13  -1   30.48   13.58
 -15 -13  -1   27.28   11.86
 -13  15  -1   40.94   13.18
  13 -15   1   12.55   10.99
  15  13   1   34.73   14.43
 -15 -13   1   31.45   11.53
 -13  15   1   45.38   15.45
 -15 -12  -1  151.80   19.72
  15  12  -1  134.60   21.46
  12 -15  -1  165.48   22.81
 -12  15  -1  193.84   22.87
  15  12   1  193.42   25.50
 -15 -12   1  186.45   21.87
 -12  15   1  161.43   23.21
  12 -15   1  176.40   22.89
 -15 -11  -1   89.29   15.09
  15  11  -1   85.67   18.56
  11 -15  -1   90.50   16.50
 -11  15  -1   59.77   14.37
  15  11   1  102.12   19.12
 -11  15   1  105.36   19.03
 -15 -11   1  126.61   17.89
  11 -15   1   85.41   17.21
 -15 -10  -1  236.26   22.89
  10 -15  -1  231.84   23.87
 -10  15  -1  212.61   23.17
  15  10  -1  174.07   22.38
 -10  15   1  232.26   25.05
  15  10   1  249.64   26.21
  10 -15   1  225.97   22.99
 -15 -10   1  220.51   21.88
  -9  15  -1  221.98   23.13
 -15  -9  -1  259.11   15.12
 -15  -9  -1  232.29   22.42
   9 -15  -1  266.73   25.75
  -9  15   1  324.73   30.56
 -15  -9   1  234.74   22.81
  15   9   1  326.41   25.47
   9 -15   1  261.14   25.44
  15   8  -1   91.75   17.99
  -8  15  -1  100.66   16.80
 -15  -8  -1   73.90   13.19
   8 -15  -1   75.30   10.53
   8 -15  -1   81.16   15.41
   8 -15   1   88.52   13.38
  -8  15   1   85.60   16.39
  15   8   1   61.49   13.67
   8 -15   1   80.92   14.82
 -15  -8   1   96.23   15.03
   7 -15  -1   27.48   10.69
  15   7  -1   28.30   11.73
 -15  -7  -1   20.38    9.57
  -7  15  -1   26.69   11.03
   7 -15  -1   16.96    6.70
   7 -15   1   37.93   11.52
 -15  -7   1   17.14    8.74
  -7  15   1   28.11   11.84
  15   7   1   15.38    9.51
   7 -15   1   21.65    8.03
  15   6  -1  109.82   12.02
  -6  15  -1   92.98   15.89
   6 -15  -1  141.42   14.48
   6 -15  -1   91.68   14.59
  15   6  -1   90.46   16.37
   6 -15   1  127.77   15.14
  -6  15   1   88.88   15.88
  15   6   1  115.09   16.49
   6 -15   1   93.71   13.97
 -15  -6   1   94.36   13.68
  15   5  -1    7.64    8.72
  -5  15  -1   29.43   11.10
  15   5  -1   24.13    7.79
   5 -15  -1   14.90    8.77
   5 -15  -1   27.63    7.39
  15   5   1   25.30    9.93
 -15  -5   1   20.45    7.79
  -5  15   1   18.95   10.66
   5 -15   1   34.91    8.79
   5 -15   1   25.24    8.78
  15   4  -1   93.36   16.64
   4 -15  -1   81.16   12.74
   4 -15  -1   59.26   10.55
  15   4  -1   83.63   11.41
  -4  15  -1   84.20   14.62
 -15  -4   1   63.03   10.97
  15   4   1   90.50   12.91
   4 -15   1   87.65   12.63
  -4  15   1   51.29   13.30
   4 -15   1   71.80   11.77
  15   4   1   90.14   15.63
  15   3  -1   58.70   10.19
  15   3  -1   98.81   16.46
   3 -15  -1   75.70   12.16
   3 -15  -1   67.01   10.85
  -3  15  -1   26.63    9.90
 -15  -3   1   52.56   10.16
  -3  15   1   76.25   14.95
  15   3   1   49.34   11.87
   3 -15   1   47.55   10.55
  15   3   1   66.52   11.52
   3 -15   1   61.53   10.43
  -2  15  -1   87.75   11.44
   2 -15  -1   84.32   11.83
   2 -15  -1   56.68   10.58
  15   2  -1   48.35    9.99
  -2  15  -1   67.90   14.14
  15   2  -1   65.44   13.67
  15   2   1   67.00   13.59
   2 -15   1   74.16   10.82
 -15  -2   1   67.56   10.12
  15   2   1   53.91   10.57
  -2  15   1   63.78   14.13
   2 -15   1   53.78   11.07
   1 -15  -1  636.21   28.36
  -1  15  -1  621.52   24.30
  -1  15  -1  702.93   34.13
  15   1  -1  607.22   32.99
  15   1  -1  664.58   28.94
   1 -15  -1  649.47   26.61
  15   1   1  580.53   30.26
  -1  15   1  589.99   32.57
  15   1   1  600.30   28.38
   1 -15   1  609.91   24.99
   1 -15   1  592.58   28.63
 -15  -1   1  637.08   25.28
   0  15  -1   39.60    8.08
  15   0  -1   30.57   11.21
  15   0  -1   24.22    9.16
   0  15  -1   34.83   10.91
   0 -15  -1   41.81    8.93
   0 -15  -1   46.68    9.84
   0 -15   1   44.87    7.97
  15   0   1   25.80    9.57
   0 -15   1   32.21    9.52
   0  15   1   26.00   11.31
  15   0   1   41.16   11.83
   1  15  -1   40.74    7.26
  15  -1  -1   33.01    9.74
   1  15  -1   51.73   13.57
  15  -1  -1   66.19   14.41
  -1 -15  -1   43.28   10.14
  -1 -15  -1   30.14    7.34
  -1 -15   1   42.73    7.36
  15  -1   1   37.23   10.63
  -1 -15   1   51.15   10.78
  15  -1   1   32.73    9.54
   1  15   1   38.21   11.47
  -2 -15  -1  296.33   15.78
  -2 -15  -1  296.80   19.93
   2  15  -1  279.69   13.00
   2  15  -1  302.34   23.87
 -15   2  -1  265.64   21.16
  15  -2  -1  288.26   20.91
   2  15   1  282.97   23.55
  -2 -15   1  311.07   21.13
   2  15   1  280.89   11.74
  -2 -15   1  305.46   14.23
 -15   2   1  289.22   23.14
  15  -2   1  288.01   21.13
  -3 -15  -1   15.01    7.05
   3  15  -1    7.62    9.32
  15  -3  -1   -0.27    7.85
  -3 -15  -1   10.24    5.35
 -15   3  -1   10.16    8.27
   3  15  -1   13.21    4.38
 -15   3   1   24.46   10.11
  15  -3   1   22.48    9.62
  -3 -15   1   -3.12    3.49
   3  15   1   12.63   10.53
  -3 -15   1    4.68    7.44
  -4 -15  -1  396.27   23.85
  -4 -15  -1  325.43   15.52
   4  15  -1  358.52   26.73
  15  -4  -1  338.32   23.28
 -15   4  -1  349.37   23.75
   4  15   1  361.46   26.19
  15  -4   1  312.26   22.57
  -4 -15   1  366.17   23.77
  -4 -15   1  350.42   12.79
 -15   4   1  391.37   26.52
 -15   5  -1  266.27   21.47
  15  -5  -1  353.52   24.66
   5  15  -1  299.28   23.80
  -5 -15  -1  308.23   14.19
  -5 -15  -1  327.78   22.19
   5  15   1  293.93   24.92
 -15   5   1  288.77   23.56
  -5 -15   1  329.39   23.05
  15  -5   1  327.75   24.11
  15  -6  -1   80.36   14.59
   6  15  -1   69.92   15.26
 -15   6  -1   80.74   14.26
  -6 -15  -1   86.71   13.98
  -6 -15  -1  103.31    8.88
   6  15   1  100.44   18.36
  -6 -15   1  103.64   15.96
  15  -6   1   89.45   15.46
 -15   6   1  104.14   17.70
 -15   7  -1   51.33   12.12
  -7 -15  -1   39.94    5.85
  15  -7  -1   36.29   11.86
   7  15  -1   50.38   14.07
  -7 -15  -1   39.25   12.02
  -7 -15   1   45.06   11.86
   7  15   1   41.75   13.81
  15  -7   1   43.67   13.21
 -15   7   1   63.47   13.98
   8  15  -1    1.71    9.65
  15  -8  -1    8.41   10.48
 -15   8  -1   -1.95    7.67
  -8 -15  -1    0.10    7.93
  -8 -15   1    8.87    7.99
   8  15   1   -2.44    9.27
 -15   8   1   -4.70    9.20
  15  -8   1   -5.64    8.34
   9  15  -1   54.70   13.82
  -9 -15  -1   50.82   12.67
 -15   9  -1   60.47   13.42
  15  -9  -1   47.55   12.97
   9  15   1   50.33   15.41
  15  -9   1   60.84   15.33
 -15   9   1   47.57   14.39
  -9 -15   1   49.83   12.26
  15 -10  -1  192.90   22.74
  10  15  -1  228.34   26.47
 -15  10  -1  184.82   21.14
 -10 -15  -1  230.65   23.96
 -15  10   1  186.70   23.06
 -10 -15   1  232.94   23.85
  15 -10   1  196.45   23.86
  10  15   1  222.34   26.33
 -11 -15  -1  180.92   22.03
  11  15  -1  130.58   21.15
  15 -11  -1  135.49   19.57
 -15  11  -1  146.82   19.91
  11  15   1  164.18   22.63
 -11 -15   1  155.37   19.85
  15 -11   1  181.71   23.45
 -15  11   1  181.52   23.37
 -12 -15  -1  146.19   19.94
 -15  12  -1  146.09   20.23
  15 -12  -1  197.05   24.18
  12  15  -1  152.69   22.95
 -12 -15   1  133.24   19.57
  12  15   1  173.21   25.41
  15 -12   1  157.06   22.86
 -15  12   1  140.87   21.03
  15 -13  -1  135.67   20.95
  13  15  -1  135.65   22.15
 -15  13  -1  122.76   18.78
 -13 -15  -1  151.44   21.20
 -13 -15   1  165.43   21.52
 -15  13   1  147.23   21.94
  15 -13   1  161.92   23.83
  13  15   1  179.66   26.07
 -14 -15  -1   42.89   13.76
 -15  14  -1   46.19   12.89
  14  15  -1   21.29   12.26
  15 -14  -1   32.58   12.77
 -15  14   1   34.33   12.97
 -14 -15   1   31.69   12.96
  15 -14   1   26.78   12.46
  14  15   1   21.34   12.31
 -15 -15  -1   17.31   11.21
  15  15  -1   12.92   11.13
  15 -15  -1    1.49    9.28
 -15  15  -1    6.23    9.82
  15 -15   1    1.86   11.94
 -15  15   1    4.32    9.60
 -15 -15   1   23.78   11.02
  15  15   1   -2.34   11.38
 -15  16  -1   43.72   14.10
  16  15  -1   49.60   16.41
  15 -16  -1   62.35   17.32
 -16 -15  -1   65.58   16.17
 -16 -15   1   75.54   16.46
  15 -16   1   61.39   17.97
  16  15   1   57.57   16.14
 -15  16   1   45.28   15.50
  14 -16  -1   -2.44   10.95
 -16 -14  -1   10.02   10.42
  16  14  -1   15.06   11.45
 -14  16  -1   16.44    9.87
 -14  16   1    6.75    9.99
  14 -16   1  -10.06   11.10
  16  14   1  -13.39    8.91
 -16 -14   1   -1.81    8.84
 -16 -13  -1  116.18   18.86
  13 -16  -1  126.62   20.46
  16  13  -1  124.70   23.00
 -13  16  -1  144.64   20.67
 -13  16   1  153.80   23.10
  13 -16   1  126.51   21.64
  16  13   1  133.24   22.63
 -16 -13   1  103.78   17.75
  16  12  -1    7.50   11.83
 -16 -12  -1   45.99   13.54
 -12  16  -1   14.39   10.70
  12 -16  -1    7.10   11.35
 -12  16   1    8.15   11.02
  16  12   1   23.64   12.25
 -16 -12   1   16.05   10.82
  12 -16   1    3.12   10.91
  11 -16  -1   61.28   15.26
  16  11  -1   72.38   16.86
 -11  16  -1   57.11   14.26
 -16 -11  -1   58.77   14.03
  11 -16   1   54.60   13.67
 -11  16   1   57.07   15.19
 -16 -11   1   33.87   11.57
  16  11   1   83.05   18.47
 -16 -10  -1  212.81   22.34
  10 -16  -1  251.89   24.86
 -10  16  -1  266.28   26.60
  16  10  -1  218.20   25.70
 -16 -10   1  248.27   24.03
  10 -16   1  264.84   26.15
 -10  16   1  273.02   29.59
  16  10   1  244.90   26.32
   9 -16  -1   93.93   16.45
  -9  16  -1  107.45   17.92
 -16  -9  -1   67.70   14.34
  16   9  -1  114.91   19.35
 -16  -9  -1  128.05   13.96
   9 -16   1   94.42   16.27
  16   9   1   86.39   16.18
  -9  16   1   90.65   17.17
 -16  -9   1  115.20   16.44
  16   8  -1  171.82   22.64
   8 -16  -1  127.98   13.94
   8 -16  -1  140.06   18.79
 -16  -8  -1  110.06   16.23
  -8  16  -1  154.02   20.75
 -16  -8   1  158.72   18.27
   8 -16   1  164.66   18.01
  -8  16   1  123.75   19.35
   8 -16   1  156.95   19.43
  16   8   1  189.63   23.60
 -16  -7  -1   72.01   13.31
   7 -16  -1   72.65   14.17
  16   7  -1   43.29   13.84
   7 -16  -1   58.16   10.45
  -7  16  -1   76.30   15.04
 -16  -7   1   79.82   13.74
  16   7   1   73.20   15.09
   7 -16   1   47.92   12.23
  -7  16   1   61.10   15.33
   7 -16   1   76.84   12.35
  16   6  -1   58.34    9.80
  -6  16  -1   46.23   12.53
  16   6  -1   36.73   13.14
   6 -16  -1   55.62   12.86
   6 -16  -1   54.80   10.04
 -16  -6   1   54.44   11.58
  -6  16   1   46.07   12.83
   6 -16   1   56.18   11.07
  16   6   1   25.22   11.24
   6 -16   1   56.58   11.94
   5 -16  -1  182.38   16.87
  16   5  -1  172.74   21.90
   5 -16  -1  177.88   19.11
  16   5  -1  182.76   15.03
  -5  16  -1  188.27   21.67
   5 -16   1  195.48   19.41
 -16  -5   1  202.28   19.06
  -5  16   1  150.71   20.07
   5 -16   1  211.39   17.22
  16   5   1  198.06   22.36
  16   4  -1    8.94    6.70
   4 -16  -1   -1.17    6.72
  16   4  -1   20.39   11.86
  -4  16  -1   15.00   10.08
   4 -16  -1   19.63    7.20
   4 -16   1   22.93    8.56
  16   4   1   24.79   10.30
   4 -16   1   16.52    7.75
  16   4   1   14.96    8.04
  -4  16   1   25.48   11.23
 -16  -4   1   11.56    7.43
   3 -16  -1   69.61   11.47
   3 -16  -1   59.00   11.54
  16   3  -1   59.63   11.02
  -3  16  -1   75.22   15.14
  16   3  -1   54.30   13.62
   3 -16   1   86.43   12.18
   3 -16   1   66.43   11.95
  -3  16   1   43.11   13.65
  16   3   1   51.67   11.21
  16   3   1   53.51   13.18
 -16  -3   1   82.28   12.13
  16   2  -1   49.04   12.97
   2 -16  -1   38.32    9.24
   2 -16  -1   27.66    8.91
  16   2  -1   27.17    8.63
  -2  16  -1   46.11    9.02
  -2  16  -1   28.98   10.17
  16   2   1   44.21   10.55
  -2  16   1   41.41   13.38
  16   2   1   24.08   10.79
   2 -16   1   37.51    9.00
   2 -16   1   20.16    8.13
 -16  -2   1   35.33    9.01
  16   1  -1  203.10   23.53
   1 -16  -1  179.13   16.71
  -1  16  -1  183.52   14.32
  -1  16  -1  267.60   22.56
   1 -16  -1  208.70   17.12
  16   1  -1  185.17   18.23
  16   1   1  158.18   17.22
  16   1   1  183.56   21.20
   1 -16   1  190.15   14.10
   1 -16   1  162.38   17.64
 -16  -1   1  172.89   13.96
  -1  16   1  200.24   22.55
   0  16  -1  165.28   12.82
   0  16  -1  162.63   20.18
  16   0  -1  189.67   22.60
   0 -16  -1  182.51   14.53
  16   0  -1  190.64   19.39
   0 -16  -1  179.59   18.23
   0  16   1  154.20   20.41
   0 -16   1  201.66   19.51
  16   0   1  139.21   17.61
   0 -16   1  154.78   12.79
  16   0   1  195.03   21.93
   1  16  -1   52.44   12.91
  -1 -16  -1  101.67   11.79
  16  -1  -1   65.14   15.15
  -1 -16  -1   83.47   13.21
  16  -1  -1   91.22   15.31
   1  16  -1   80.44    9.35
  16  -1   1   98.31   15.94
  16  -1   1   75.29   12.99
  -1 -16   1  103.01   14.70
  -1 -16   1   85.20   10.19
   1  16   1   96.85   17.84
  16  -2  -1   13.77    9.41
  -2 -16  -1    5.35    5.44
 -16   2  -1   13.65    8.71
   2  16  -1   10.48    5.27
   2  16  -1   15.89   10.01
  -2 -16  -1    2.74    6.96
 -16   2   1   13.29    9.77
  16  -2   1   10.35    9.37
  -2 -16   1   -3.46    3.92
  -2 -16   1    4.76    7.01
   2  16   1    9.67   10.40
  16  -3  -1  206.72   21.28
   3  16  -1  164.58   20.75
  -3 -16  -1  153.88   17.76
  -3 -16  -1  142.78   11.64
 -16   3  -1  173.15   19.54
  -3 -16   1  194.46   20.70
  16  -3   1  187.68   20.73
   3  16   1  177.84   22.56
 -16   3   1  125.02   19.60
  -3 -16   1  165.58   10.49
  16  -4  -1   -5.57    8.66
  -4 -16  -1    8.72    7.96
  -4 -16  -1    0.49    4.96
 -16   4  -1   15.81    9.22
   4  16  -1    7.88    9.51
  -4 -16   1   -4.75    6.75
 -16   4   1    0.89    8.04
   4  16   1    1.85    8.07
  -4 -16   1    7.54    4.22
  16  -4   1   25.28   11.36
  -5 -16  -1   41.06    7.16
  -5 -16  -1   32.99   10.63
  16  -5  -1   44.95   12.62
 -16   5  -1   33.30   11.15
   5  16  -1   35.92   11.85
   5  16   1   52.41   14.57
  16  -5   1   48.39   13.30
  -5 -16   1   33.09   10.72
 -16   5   1   54.11   13.57
   6  16  -1  221.14   24.31
  16  -6  -1  273.20   26.97
  -6 -16  -1  234.62   22.18
 -16   6  -1  253.27   24.13
  -6 -16  -1  211.06   13.72
 -16   6   1  185.08   23.06
  16  -6   1  250.22   24.73
   6  16   1  250.76   27.95
  -6 -16   1  250.78   24.28
   7  16  -1   85.42   17.41
  -7 -16  -1  128.72   18.00
  16  -7  -1  103.76   18.46
 -16   7  -1   99.57   16.48
  -7 -16   1  101.87   16.33
  16  -7   1  128.86   19.21
 -16   7   1   93.25   17.16
   7  16   1   89.60   17.78
   8  16  -1  366.29   29.22
  -8 -16  -1  345.14   25.49
  16  -8  -1  402.22   28.72
 -16   8  -1  346.18   25.73
  16  -8   1  385.65   28.34
   8  16   1  357.16   27.95
 -16   8   1  366.25   28.22
  -8 -16   1  355.06   25.96
  -9 -16  -1  102.57   16.85
  16  -9  -1  174.49   23.15
   9  16  -1  115.08   18.72
 -16   9  -1  143.71   19.57
  16  -9   1  127.51   20.01
  -9 -16   1  142.15   19.27
 -16   9   1  114.50   19.50
   9  16   1  101.60   18.61
 -10 -16  -1   15.89   10.20
 -16  10  -1   22.20   10.94
  16 -10  -1   10.97   10.37
  10  16  -1   20.45   12.81
 -10 -16   1   29.70   11.77
  16 -10   1   20.75   11.46
 -16  10   1   15.03   11.21
  10  16   1    3.47    9.77
 -16  11  -1  109.83   17.23
 -11 -16  -1  121.31   19.36
  11  16  -1  111.23   19.95
  16 -11  -1   92.87   18.91
  11  16   1  107.13   19.98
 -16  11   1  102.69   19.44
  16 -11   1  149.40   22.03
 -11 -16   1   65.44   14.88
  12  16  -1   19.57   11.87
 -12 -16  -1   13.47   10.87
 -16  12  -1   -2.04    8.23
  16 -12  -1    5.66   10.44
 -16  12   1    9.69   10.93
  12  16   1   -4.65   11.00
  16 -12   1  -19.90    9.11
 -12 -16   1    2.90    8.25
  13  16  -1   76.78   19.22
  16 -13  -1   44.32   15.37
 -13 -16  -1   68.42   16.34
 -16  13  -1   65.79   15.00
 -16  13   1   61.79   16.19
  16 -13   1   77.99   18.11
  13  16   1   54.47   15.90
 -13 -16   1   60.02   15.26
  14  16  -1   55.63   16.95
 -14 -16  -1   46.27   13.97
 -16  14  -1   53.46   13.96
  16 -14  -1   48.57   14.55
  16 -14   1   54.86   16.47
 -14 -16   1   72.23   16.44
 -16  14   1   48.56   15.18
  14  16   1   57.15   17.47
 -16  15  -1   33.76   12.70
  16 -15  -1   60.90   17.31
 -15 -16  -1   57.60   16.09
  15  16  -1   76.83   18.98
 -16  15   1   42.64   15.59
  16 -15   1   43.98   15.37
  15  16   1   79.86   17.82
 -15 -16   1   60.49   15.81
  16  16  -1   40.68   17.42
 -16 -16  -1   64.59   15.63
  16 -16  -1   44.39   15.50
 -16  16  -1   72.75   17.40
 -16 -16   1   31.56   13.50
 -16  16   1   39.86   15.21
  16  16   1   49.88   17.20
  16 -16   1   65.08   17.85
  17  16  -1   44.76   15.83
 -17 -16  -1   47.23   15.22
 -16  17  -1   65.37   16.50
  16 -17  -1   33.07   15.17
 -17 -16   1   56.46   16.31
 -16  17   1   30.85   14.13
  16 -17   1   54.78   17.70
  17  16   1   48.71   18.59
 -17 -15  -1   22.83   11.79
  15 -17  -1   26.07   15.59
  17  15  -1   21.52   14.26
 -15  17  -1   39.50   14.25
  17  15   1   12.26   13.74
  15 -17   1   33.33   15.54
 -17 -15   1   22.36   12.59
 -15  17   1   35.92   15.43
 -17 -14  -1   58.57   15.97
 -14  17  -1   84.56   17.07
  17  14  -1   55.33   17.21
  14 -17  -1   60.41   15.51
  14 -17   1   84.42   19.86
 -14  17   1   94.61   19.71
 -17 -14   1   81.96   17.21
  17  14   1   51.94   16.68
 -17 -13  -1    1.26    9.86
  13 -17  -1    4.31   11.10
 -13  17  -1   24.33   11.94
  17  13  -1   18.63   13.30
  17  13   1   -9.02   10.04
 -13  17   1   16.09   11.68
  13 -17   1   -1.87   10.44
 -17 -13   1   11.56   10.50
  12 -17  -1   67.68   15.40
 -17 -12  -1  116.45   19.06
  17  12  -1   89.15   19.13
 -12  17  -1  106.28   18.63
 -17 -12   1   96.64   17.77
  17  12   1   78.80   19.21
 -12  17   1   87.33   18.91
  12 -17   1   82.21   17.00
 -17 -11  -1  103.63   17.95
  17  11  -1   58.15   17.21
  11 -17  -1   88.59   17.70
 -11  17  -1   51.27   14.41
 -11  17   1   89.63   18.36
  11 -17   1   91.04   17.34
  17  11   1   59.55   15.99
 -17 -11   1  102.61   17.38
 -17 -10  -1   49.18   13.24
  10 -17  -1   39.32   12.24
  17  10  -1   60.53   16.43
 -10  17  -1   48.41   14.77
  17  10   1   48.62   15.04
 -17 -10   1   28.01   11.41
  10 -17   1   61.15   14.73
 -10  17   1   47.03   14.89
  17   9  -1  202.38   25.96
 -17  -9  -1  238.60   24.29
   9 -17  -1  194.60   23.01
  -9  17  -1  203.05   23.97
  17   9   1  233.55   26.70
 -17  -9   1  181.15   20.75
  -9  17   1  226.74   26.47
   9 -17   1  233.67   24.66
 -17  -8  -1  129.87   18.31
  -8  17  -1  129.48   19.16
   8 -17  -1  133.75   15.16
  17   8  -1  114.79   19.78
   8 -17  -1  153.55   19.95
   8 -17   1  147.34   17.60
   8 -17   1  187.67   21.37
 -17  -8   1  132.08   17.34
  -8  17   1  129.12   19.83
  17   8   1  145.48   20.75
   7 -17  -1   -1.08    5.65
   7 -17  -1   -1.53    8.19
  17   7  -1    0.92    9.18
  -7  17  -1    6.90    9.52
 -17  -7  -1    6.77    8.41
  17   7   1    5.33    9.62
  -7  17   1   12.36   10.99
   7 -17   1    3.65    6.54
   7 -17   1   14.72    8.74
 -17  -7   1    0.61    7.17
  17   6  -1   23.53   12.43
   6 -17  -1   23.25   10.65
  -6  17  -1   15.40   10.65
   6 -17  -1   28.37    8.27
  17   6  -1   24.07    8.72
  -6  17   1   34.82   13.49
   6 -17   1   20.38    8.69
  17   6   1   22.77   10.93
   6 -17   1   13.65    9.46
 -17  -6   1   15.00    8.68
   5 -17  -1   -0.75    6.06
  17   5  -1    1.52    6.16
  -5  17  -1  -16.04    7.82
  17   5  -1  -14.62    7.92
   5 -17  -1    5.72    7.96
   5 -17   1   -1.12    5.62
  17   5   1   -5.47    7.58
  -5  17   1    0.49    9.05
 -17  -5   1    3.69    7.15
   5 -17   1    8.29    7.71
  -4  17  -1   49.85   12.57
   4 -17  -1   55.05   12.36
  17   4  -1   50.32   10.86
  17   4  -1   37.82   12.81
   4 -17  -1   61.72   11.10
   4 -17   1   26.62    9.10
  -4  17   1   61.10   14.97
   4 -17   1   90.37   13.33
 -17  -4   1   39.86    9.97
  17   4   1   26.71   11.02
  17   4   1   47.94   11.13
  -3  17  -1    8.38    7.91
  17   3  -1   20.75   11.35
  -3  17  -1   29.62   12.46
   3 -17  -1    8.40    7.82
   3 -17  -1   27.41    8.26
  17   3  -1   23.10    8.68
 -17  -3   1   17.56    8.06
   3 -17   1   17.48    8.11
  17   3   1   19.70   10.39
   3 -17   1   11.16    7.35
  17   3   1    6.37    7.54
  -3  17   1   26.72   12.04
  -2  17  -1  244.82   17.09
   2 -17  -1  225.95   17.76
  -2  17  -1  210.10   24.19
   2 -17  -1  249.31   19.13
  17   2  -1  282.77   28.61
  17   2  -1  262.59   19.44
   2 -17   1  229.22   18.89
  17   2   1  246.90   24.54
  -2  17   1  275.30   28.93
   2 -17   1  231.35   17.13
  17   2   1  228.19   18.90
 -17  -2   1  241.95   17.48
  -1  17  -1  130.18   19.22
   1 -17  -1  155.40   15.73
  17   1  -1  121.57   16.06
   1 -17  -1  110.60   14.97
  -1  17  -1  142.68   14.32
  17   1  -1  158.32   22.15
   1 -17   1  148.54   14.71
   1 -17   1  104.49   15.13
 -17  -1   1  153.53   15.13
  17   1   1  130.41   17.24
  -1  17   1   92.26   17.26
  17   1   1  129.75   18.50
  17   0  -1  276.15   21.05
   0 -17  -1  298.15   21.68
   0 -17  -1  320.07   19.11
   0  17  -1  321.03   26.66
   0  17  -1  274.83   16.02
  17   0  -1  268.55   26.82
   0  17   1  326.48   31.13
   0 -17   1  297.83   22.32
   0 -17   1  324.18   17.50
 -17   0   1  331.31   18.40
  17   0   1  331.45   24.37
  17   0   1  273.69   21.62
  -1 -17  -1   42.21    9.19
  17  -1  -1   39.46   12.02
   1  17  -1   43.88    7.75
   1  17  -1   49.71   14.89
  -1 -17  -1   20.07    8.96
  -1 -17   1   28.42   10.10
  17  -1   1   48.90   12.83
 -17   1   1   32.86   12.32
   1  17   1   34.51   13.31
  17  -1   1   24.25   10.16
  -1 -17   1   23.38    6.90
   2  17  -1   56.38   14.81
  -2 -17  -1   58.74   12.49
 -17   2  -1   53.93   13.08
  17  -2  -1   62.89   13.30
  -2 -17  -1   99.34   11.29
 -17   2   1   73.87   15.35
   2  17   1   60.63   16.81
  -2 -17   1   73.95   13.84
  -2 -17   1   87.29    9.85
  17  -2   1   63.98   14.37
  17  -3  -1   45.63   13.18
  -3 -17  -1   39.45    8.06
  -3 -17  -1   48.11   11.47
 -17   3  -1   58.03   13.32
   3  17  -1   37.28   12.89
  17  -3   1   54.14   14.00
  -3 -17   1   34.78   11.24
   3  17   1   61.20   15.69
  -3 -17   1   45.00    7.49
 -17   3   1   27.36   11.04
   4  17  -1  107.63   19.38
  17  -4  -1   72.05   14.98
 -17   4  -1   55.73   12.93
  -4 -17  -1  109.12   16.06
  -4 -17  -1   97.12   10.12
   4  17   1   65.06   16.28
 -17   4   1   79.94   16.15
  17  -4   1   67.17   13.84
  -4 -17   1   46.82   12.77
   5  17  -1   54.37   15.27
  17  -5  -1   82.94   16.10
 -17   5  -1   69.79   14.25
  -5 -17  -1   76.70   14.49
   5  17   1   41.85   14.28
  -5 -17   1   76.27   14.82
 -17   5   1   90.77   17.11
  17  -5   1   45.61   13.84
 -17   6  -1  135.56   19.18
  -6 -17  -1  137.39   18.54
   6  17  -1  155.45   21.12
  17  -6  -1  147.08   19.46
  17  -6   1  122.36   19.26
  -6 -17   1  171.36   21.36
   6  17   1  121.12   19.84
 -17   6   1  136.77   20.45
  17  -7  -1  543.85   32.74
 -17   7  -1  509.35   30.45
  -7 -17  -1  539.26   31.43
   7  17  -1  525.75   34.81
   7  17   1  522.62   34.25
 -17   7   1  501.53   32.56
  -7 -17   1  476.41   30.63
  17  -7   1  555.31   33.73
   8  17  -1  170.72   22.56
  -8 -17  -1  194.51   23.01
  17  -8  -1  244.16   26.69
 -17   8  -1  184.83   22.06
   8  17   1  176.38   23.19
  17  -8   1  155.22   21.31
 -17   8   1  219.02   25.86
  -8 -17   1  241.64   25.68
  -9 -17  -1   66.93   14.90
 -17   9  -1   45.72   12.97
   9  17  -1   19.17   12.77
  17  -9  -1   59.03   16.49
 -17   9   1   49.65   14.65
  17  -9   1   31.53   13.13
   9  17   1   30.42   14.73
  -9 -17   1   62.91   14.86
 -17  10  -1   69.62   15.60
  17 -10  -1   87.47   19.02
  10  17  -1   69.88   18.13
 -10 -17  -1   58.40   14.14
  17 -10   1  121.77   20.69
  10  17   1  109.98   21.44
 -17  10   1   70.24   17.09
 -10 -17   1   72.76   15.88
 -11 -17  -1   48.77   13.77
  17 -11  -1   28.34   14.63
  11  17  -1   25.10   14.37
 -17  11  -1   29.57   11.67
  17 -11   1   37.18   13.83
 -17  11   1   36.78   14.29
  11  17   1   29.41   12.79
 -11 -17   1   55.84   14.05
  17 -12  -1    0.64   12.43
 -12 -17  -1   51.37   15.19
  12  17  -1   40.94   15.14
 -17  12  -1   29.23   12.03
  12  17   1   61.53   18.07
  17 -12   1   65.61   16.34
 -12 -17   1   38.64   12.94
 -17  12   1   64.78   16.39
 -13 -17  -1   10.52   10.19
  17 -13  -1   12.03   12.94
  13  17  -1   16.60   11.63
 -17  13  -1    4.80    9.11
  17 -13   1   18.49   11.50
 -13 -17   1   21.99   11.18
 -17  13   1   13.84   11.00
  13  17   1   -8.32    9.03
 -14 -17  -1   58.78   16.15
  14  17  -1   28.43   13.50
  17 -14  -1   38.55   15.73
 -17  14  -1   57.93   14.80
  14  17   1   21.31   14.59
 -17  14   1   50.91   16.22
 -14 -17   1   64.09   16.08
  17 -14   1   54.97   16.11
 -17  15  -1  286.12   29.57
 -15 -17  -1  174.78   24.67
  15  17  -1  231.55   29.71
  17 -15  -1  290.88   32.53
 -17  15   1  227.49   28.59
  15  17   1  254.21   31.71
  17 -15   1  200.51   26.59
 -15 -17   1  341.69   33.07
  16  17  -1   66.78   20.05
 -16 -17  -1   54.48   16.40
 -17  16  -1   56.31   16.01
  17 -16  -1   91.50   20.94
  16  17   1   45.55   17.34
 -16 -17   1   69.35   17.07
 -17  16   1   38.39   14.56
  17 -16   1   52.74   17.03
 -17  17  -1   21.38   12.63
  17  17  -1    5.25   13.47
  17 -17  -1   27.85   14.94
 -17 -17  -1    7.57   11.22
 -17 -17   1   34.43   13.98
  17  17   1   12.42   14.29
 -17  17   1   22.71   14.12
  17 -17   1   22.26   14.40
 -17  18  -1   77.56   18.40
 -18 -17  -1   34.57   15.06
  18  17  -1   34.14   15.16
  17 -18  -1   50.64   18.86
  18  17   1   57.66   18.62
 -18 -17   1   69.94   18.17
 -17  18   1   24.08   14.59
  17 -18   1   50.87   17.60
 -16  18  -1   49.21   15.53
  18  16  -1   61.27   20.12
 -18 -16  -1   23.67   12.97
  16 -18  -1   25.72   15.54
 -16  18   1   80.64   19.94
 -18 -16   1   35.70   15.59
  18  16   1   48.90   18.05
  16 -18   1   25.45   15.38
  18  15  -1   46.50   16.67
 -18 -15  -1   53.00   15.44
 -15  18  -1   42.93   14.52
  15 -18  -1   57.00   17.57
 -18 -15   1   52.66   15.74
  15 -18   1   50.67   16.51
  18  15   1   37.59   15.41
 -15  18   1   52.15   16.93
 -18 -14  -1   69.86   16.40
  18  14  -1  113.48   22.51
 -14  18  -1  120.48   21.37
  14 -18  -1  121.30   21.59
  18  14   1  106.61   22.27
 -18 -14   1  115.49   19.39
  14 -18   1  112.27   21.02
 -14  18   1  102.41   20.18
  18  13  -1   27.25   14.73
  13 -18  -1   28.92   13.69
 -18 -13  -1   18.61   11.74
 -13  18  -1   27.40   12.68
  18  13   1   14.73   12.63
 -13  18   1   21.25   12.68
  13 -18   1   14.71   12.15
 -18 -13   1   26.38   11.88
 -12  18  -1    5.95    9.70
 -18 -12  -1   10.81   10.52
  12 -18  -1    5.23   10.58
  18  12  -1    1.96   11.42
  12 -18   1   22.26   12.18
  18  12   1   -4.32    9.06
 -18 -12   1    7.75    9.32
 -12  18   1    4.10    9.57
 -11  18  -1   90.85   17.46
  11 -18  -1   59.08   15.91
  18  11  -1   81.67   18.54
 -18 -11  -1  102.30   18.35
 -18 -11   1  100.04   17.10
  18  11   1   72.10   17.42
 -11  18   1   90.91   19.60
  11 -18   1   62.81   15.59
 -10  18  -1    8.50   10.43
  10 -18  -1   -4.64    9.01
 -18 -10  -1    0.20    8.30
  18  10  -1    2.16   11.42
 -18 -10   1    2.92    7.93
  18  10   1    7.91   11.49
 -10  18   1    2.76    9.48
  10 -18   1   16.62   11.37
 -18  -9  -1   65.35   14.75
   9 -18  -1   57.17   14.63
  -9  18  -1   46.91   14.59
  18   9  -1   45.98   15.85
  18   9   1   52.69   15.42
   9 -18   1   53.71   14.19
  -9  18   1   62.93   16.28
 -18  -9   1   74.32   14.90
   8 -18  -1   31.89   11.89
 -18  -8  -1   10.56   10.19
  18   8  -1   41.58   15.76
   8 -18  -1   29.89    8.59
  -8  18  -1   21.98   12.27
 -18  -8   1   47.87   12.55
  -8  18   1   45.27   14.51
   8 -18   1   26.62   11.77
   8 -18   1   41.49   11.06
  18   8   1   36.19   12.74
 -18  -7  -1  136.90   17.92
   7 -18  -1  134.38   18.91
   7 -18  -1  142.68   16.70
  -7  18  -1   92.02   17.19
  18   7  -1  112.41   19.62
   7 -18   1  122.88   16.83
   7 -18   1  120.66   17.27
  18   7   1  112.06   18.92
  -7  18   1  111.68   20.04
 -18  -7   1  108.70   15.80
   6 -18  -1   29.23    8.89
  18   6  -1   34.62    9.72
  18   6  -1   49.88   14.31
  -6  18  -1   29.03   13.12
 -18  -6  -1   26.57   10.49
   6 -18  -1   31.29   11.29
 -18  -6   1   32.13   10.79
  -6  18   1   51.27   14.65
  18   6   1   45.87   13.88
   6 -18   1   34.95   11.35
   6 -18   1   41.01   10.83
  18   5  -1  183.83   24.64
  -5  18  -1  189.22   23.94
   5 -18  -1  154.80   17.23
  18   5  -1  202.55   18.82
   5 -18  -1  194.50   20.55
   5 -18   1  187.65   20.53
   5 -18   1  220.37   21.22
 -18  -5   1  197.22   20.02
  -5  18   1  167.28   24.35
  18   5   1  147.98   20.52
   4 -18  -1   56.90   12.12
   4 -18  -1   48.54   10.74
  18   4  -1   51.29   11.16
  -4  18  -1   46.07   14.81
  -4  18  -1   45.26   11.86
  18   4  -1   38.79   12.97
  18   4   1   40.08   10.81
   4 -18   1   43.09   11.17
 -18  -4   1   54.38   11.39
   4 -18   1   71.36   12.56
  18   4   1   44.36   13.30
  -4  18   1   24.91   11.19
  18   3  -1   82.09   13.68
  -3  18  -1   78.67   16.98
   3 -18  -1   79.79   12.61
   3 -18  -1   86.76   14.13
  18   3  -1   81.09   16.64
  -3  18  -1   85.97   13.41
  18   3   1   44.68   11.94
  18   3   1   79.77   16.02
  -3  18   1   56.09   16.04
   3 -18   1   83.43   13.94
 -18  -3   1   58.08   11.59
   3 -18   1   63.53   12.07
  18   2  -1   39.89   14.78
   2 -18  -1   58.35   12.16
   2 -18  -1   38.79   10.10
  -2  18  -1   46.39   14.32
  18   2  -1   65.15   12.22
  -2  18  -1   76.69   12.15
 -18  -2   1   52.27   11.06
   2 -18   1   46.55   11.12
   2 -18   1   43.94   10.32
  -2  18   1   45.77   14.54
  18   2   1   52.96   13.83
  18   2   1   62.35   12.81
  18   1  -1   40.80   11.67
  18   1  -1   61.78   15.40
   1 -18  -1   51.19   10.80
  -1  18  -1   49.31   14.85
   1 -18  -1   48.16   11.62
  -1  18  -1   48.28    9.80
   1 -18   1   40.67   11.43
  -1  18   1   60.63   14.66
  18   1   1   44.12   11.61
  18   1   1   52.25   13.65
   1 -18   1   62.59   10.85
 -18  -1   1   53.43   10.80
   0  18  -1  162.89   22.96
   0 -18  -1  154.10   18.32
  18   0  -1  150.33   19.14
  18   0  -1  166.91   22.66
   0 -18  -1  170.56   16.64
   0  18  -1  153.71   20.60
 -18   0   1  154.77   14.86
   0  18   1  128.14   20.22
   0 -18   1  179.25   15.88
   0 -18   1  129.60   17.64
  18   0   1  147.47   19.50
  18   0   1  159.56   21.03
   1  18  -1  127.79   20.80
  -1 -18  -1  140.22   14.81
  -1 -18  -1  119.72   16.74
 -18   1  -1  105.60   17.63
  18  -1  -1  127.97   17.89
   1  18   1  118.14   20.09
 -18   1   1  121.93   13.31
  18  -1   1  148.94   19.63
  -1 -18   1  150.83   13.67
  -1 -18   1  143.14   18.51
 -18   1   1  120.51   19.88
  -2 -18  -1    4.77    5.95
   2  18  -1   16.07   11.76
 -18   2  -1   11.28    9.75
  -2 -18  -1   16.29    9.59
  18  -2  -1   -9.86    8.23
  -2 -18   1    2.45    7.98
   2  18   1   14.55   12.67
  18  -2   1    2.66    8.25
 -18   2   1   12.43    9.49
  -2 -18   1    9.74    8.41
  18  -3  -1   56.77   13.58
  -3 -18  -1   30.46   11.09
   3  18  -1   45.67   14.05
 -18   3  -1   50.80   13.13
  -3 -18  -1   57.85    9.30
 -18   3   1   47.17   13.11
   3  18   1   21.44   11.88
  18  -3   1   39.20   11.96
  -3 -18   1   42.75   11.84
  -4 -18  -1   90.07   15.82
  18  -4  -1  103.65   18.14
   4  18  -1  147.33   22.66
 -18   4  -1  116.68   17.93
 -18   4   1  121.62   19.72
  -4 -18   1  114.06   17.66
   4  18   1   99.76   19.78
  18  -4   1  133.69   20.22
 -18   5  -1   52.23   13.56
   5  18  -1   53.64   15.29
  18  -5  -1   52.85   13.38
  -5 -18  -1   54.64   12.81
  -5 -18   1   70.53   14.87
  18  -5   1   82.78   16.49
   5  18   1   27.81   13.87
 -18   5   1   56.24   14.17
  -6 -18  -1  181.97   21.24
 -18   6  -1  201.52   22.98
  18  -6  -1  177.64   23.54
   6  18  -1  169.71   23.10
   6  18   1  146.98   22.88
 -18   6   1  179.86   23.69
  18  -6   1  203.00   24.67
  -6 -18   1  200.92   23.27
   7  18  -1  224.08   27.81
 -18   7  -1  230.67   24.50
  -7 -18  -1  249.36   26.12
  18  -7  -1  268.10   27.87
  18  -7   1  222.29   25.92
   7  18   1  231.32   29.44
 -18   7   1  218.69   25.51
  -7 -18   1  222.75   23.94
  -8 -18  -1    8.66   10.50
 -18   8  -1   -5.06    8.44
  18  -8  -1   15.96   11.92
   8  18  -1    3.94   11.42
  -8 -18   1   11.79    9.98
 -18   8   1    3.07    9.83
  18  -8   1   15.80   12.13
   8  18   1    4.51   11.04
   9  18  -1   84.65   18.44
 -18   9  -1   88.71   17.22
  -9 -18  -1  115.90   18.73
  18  -9  -1   84.80   17.31
  -9 -18   1  104.02   18.62
   9  18   1   88.03   19.38
  18  -9   1  121.88   20.54
 -18   9   1  133.20   21.30
 -10 -18  -1  -11.00    7.03
  10  18  -1   13.45   11.27
 -18  10  -1   -1.92    8.52
  18 -10  -1    7.11   11.83
 -18  10   1  -10.02    8.77
  10  18   1    5.97   11.42
  18 -10   1    3.44    9.82
 -10 -18   1   -3.36    8.04
  11  18  -1   43.05   16.09
  18 -11  -1   49.88   16.49
 -18  11  -1   40.60   13.15
 -11 -18  -1   39.62   13.25
  18 -11   1   41.08   14.81
 -11 -18   1   44.50   14.73
  11  18   1   87.53   19.49
 -18  11   1   63.71   16.92
  18 -12  -1   12.57   11.86
 -12 -18  -1    4.45   10.05
 -18  12  -1   10.10   10.36
  12  18  -1   -5.56   11.24
  18 -12   1    7.91   11.91
  12  18   1    2.63   11.00
 -18  12   1   -9.74    8.53
 -12 -18   1   10.23   10.38
 -18  13  -1   65.18   16.36
  13  18  -1   45.98   15.51
 -13 -18  -1   66.36   16.78
  18 -13  -1   93.27   19.33
  13  18   1   46.10   17.90
  18 -13   1   73.57   19.22
 -13 -18   1   76.72   17.49
 -18  13   1   83.45   18.79
 -14 -18  -1  212.82   26.75
  18 -14  -1  221.46   29.32
  14  18  -1  250.02   30.87
 -18  14  -1  244.57   26.78
 -14 -18   1  307.09   31.03
 -18  14   1  247.02   30.47
  18 -14   1  248.71   30.13
  14  18   1  259.56   32.69
  15  18  -1   48.09   17.57
 -15 -18  -1   44.72   14.83
 -18  15  -1   44.05   14.98
  18 -15  -1   34.25   17.43
 -15 -18   1   27.57   13.80
  18 -15   1   40.74   16.43
 -18  15   1   37.42   14.95
  15  18   1   17.54   12.84
  18 -16  -1  157.83   26.10
 -16 -18  -1  180.32   25.00
 -18  16  -1  144.41   22.56
  16  18  -1  155.22   27.76
  16  18   1  187.57   28.48
  18 -16   1  154.61   25.06
 -18  16   1  167.80   25.49
 -16 -18   1  198.44   26.78
 -17 -18  -1   49.01   15.67
 -18  17  -1   41.57   15.25
  18 -17  -1   39.47   17.16
  17  18  -1   21.01   14.83
 -18  17   1   33.58   15.55
 -17 -18   1   61.60   16.91
  18 -17   1   35.36   17.20
  17  18   1   14.13   14.47
 -16  19  -1   23.53   14.29
  16 -19  -1   37.00   18.10
  19  16  -1   40.14   17.73
 -19 -16  -1   65.32   17.73
 -16  19   1   31.96   15.80
 -19 -16   1   26.45   13.99
  19  16   1   49.98   18.49
  16 -19   1   25.61   14.58
  15 -19  -1   64.07   18.54
  19  15  -1   46.34   17.72
 -19 -15  -1   95.94   19.91
 -15  19  -1   44.69   15.09
 -15  19   1   22.08   13.76
  15 -19   1   80.68   19.90
 -19 -15   1   54.34   15.85
  19  15   1   96.12   22.44
 -14  19  -1   84.08   18.94
  14 -19  -1   63.17   18.56
 -19 -14  -1  114.17   19.93
  19  14  -1   77.91   20.40
  19  14   1   75.40   18.36
  14 -19   1   50.84   16.35
 -19 -14   1   62.41   16.00
 -14  19   1   67.62   18.97
 -19 -13  -1  100.23   19.62
 -13  19  -1  107.42   20.23
  13 -19  -1  112.09   20.58
  19  13  -1   88.67   20.74
  13 -19   1  147.45   23.54
 -13  19   1  113.61   22.78
  19  13   1   73.40   19.34
 -19 -13   1  117.85   19.83
 -19 -12  -1   24.04   13.20
 -12  19  -1   26.55   13.23
  12 -19  -1    3.56   10.69
  19  12  -1   34.13   15.71
 -19 -12   1   13.67   10.81
  12 -19   1   20.90   12.98
 -12  19   1   19.07   12.49
  19  12   1   15.35   13.17
  11 -19  -1    2.33   10.16
 -11  19  -1   -2.90    9.45
 -19 -11  -1  -11.58    8.21
  19  11  -1   -8.76   10.74
 -19 -11   1   23.40   11.32
 -11  19   1   -0.88    9.81
  11 -19   1    8.47   11.40
  19  11   1    7.29   11.71
 -19 -10  -1   27.48   11.86
  10 -19  -1   36.42   14.15
  19  10  -1   22.10   13.10
 -10  19  -1   21.27   12.47
 -10  19   1   27.92   14.05
  19  10   1   54.01   15.50
  10 -19   1   27.44   13.07
 -19 -10   1   22.51   10.85
  19   9  -1    2.53   10.98
 -19  -9  -1   30.25   11.66
   9 -19  -1   14.99   11.02
  -9  19  -1   24.27   13.28
  -9  19   1   35.76   14.02
   9 -19   1    9.24   10.20
  19   9   1   14.46   12.52
 -19  -9   1   32.05   11.63
   8 -19  -1  149.03   20.11
  19   8  -1  134.00   21.99
  -8  19  -1  129.06   20.45
 -19  -8  -1  127.06   18.88
  -8  19   1  160.10   25.48
   8 -19   1  141.27   19.98
   8 -19   1  131.55   18.44
  19   8   1   70.30   16.56
 -19  -8   1  117.27   17.54
   7 -19  -1  221.29   20.74
 -19  -7  -1  223.81   23.16
  19   7  -1  230.25   28.11
  -7  19  -1  132.33   21.12
   7 -19  -1  250.31   24.78
   7 -19   1  199.62   21.92
 -19  -7   1  239.85   23.91
  19   7   1  230.69   27.96
  -7  19   1  167.96   24.09
   7 -19   1  223.18   23.83
   6 -19  -1   97.91   16.06
 -19  -6  -1  126.00   17.35
  19   6  -1   73.95   17.78
   6 -19  -1  142.41   16.93
  19   6  -1  116.87   15.26
  -6  19  -1  106.01   18.96
   6 -19   1   73.83   14.33
   6 -19   1   81.04   15.54
  -6  19   1  119.23   21.01
  19   6   1  119.24   19.81
 -19  -6   1  136.36   18.43
  -5  19  -1  418.24   24.86
  19   5  -1  410.09   23.92
   5 -19  -1  404.47   26.28
  -5  19  -1  368.17   29.60
  19   5  -1  380.26   30.89
   5 -19  -1  401.07   24.69
 -19  -5   1  409.58   25.50
   5 -19   1  395.76   25.70
  -5  19   1  399.74   32.05
  19   5   1  407.97   30.05
   5 -19   1  431.49   26.82
  19   4  -1  161.63   23.07
   4 -19  -1  133.08   17.69
   4 -19  -1  135.89   16.65
  -4  19  -1  171.04   23.89
  19   4  -1  196.56   19.95
  -4  19  -1  174.92   18.42
   4 -19   1  172.37   20.22
  19   4   1  155.60   18.80
  -4  19   1  174.14   25.44
 -19  -4   1  182.60   19.02
   4 -19   1  167.09   18.88
  19   4   1  208.67   25.37
  19   3  -1   19.90   12.76
  -3  19  -1    7.27    8.54
  -3  19  -1   21.71   12.58
   3 -19  -1   14.59    8.00
   3 -19  -1    0.48    7.54
  19   3  -1    8.96    8.06
  19   3   1    9.37    8.90
  19   3   1   17.35   11.07
   3 -19   1   11.73    8.32
 -19  -3   1   11.94    8.30
   3 -19   1   10.58    8.36
  -3  19   1    6.64    9.77
   2 -19  -1  190.57   20.31
   2 -19  -1  204.76   19.59
  -2  19  -1  172.91   17.01
  -2  19  -1  182.49   23.63
  19   2  -1  164.45   19.60
  19   2  -1  160.46   23.19
  19   2   1  146.04   18.89
   2 -19   1  173.47   17.89
  19   2   1  210.14   26.08
   2 -19   1  151.68   19.17
  -2  19   1  149.36   22.22
 -19  -2   1  188.05   18.25
   1 -19  -1   25.27    9.69
  19   1  -1   28.99   10.18
  -1  19  -1   33.77   12.80
  19   1  -1   27.33   12.35
   1 -19  -1   30.84   10.28
  -1  19   1   39.51   14.23
 -19  -1   1   26.30    9.28
   1 -19   1   44.47    9.91
  19   1   1   60.78   13.26
   1 -19   1   48.93   11.95
  19   1   1   34.52   12.55
  19   0  -1   45.25   12.11
  19   0  -1   57.70   15.76
   0 -19  -1   74.05   14.22
   0 -19  -1   61.29   11.52
   0  19  -1   23.50   12.18
 -19   0   1   55.29   10.60
   0  19   1   55.90   15.49
   0 -19   1   66.86   14.27
   0 -19   1   52.37   10.26
  19   0   1   33.70   11.88
  19   0   1   66.61   15.23
  19  -1  -1  154.45   19.50
 -19   1  -1  152.18   21.18
   1  19  -1  141.38   21.35
  -1 -19  -1  167.43   16.38
  -1 -19  -1  131.48   18.12
  19  -1   1  125.18   18.53
   1  19   1  160.05   22.62
 -19   1   1  160.82   23.10
 -19   1   1  186.06   16.41
  -1 -19   1  126.50   18.93
   2  19  -1   23.44   12.59
 -19   2  -1   55.53   14.15
  19  -2  -1   54.99   13.08
  -2 -19  -1   39.40    8.88
  -2 -19  -1   26.15   10.52
 -19   2   1   41.35    8.39
  19  -2   1   49.53   13.73
 -19   2   1   38.77   12.94
  -2 -19   1   43.14   12.20
   2  19   1   42.69   16.65
  19  -3  -1  117.70   19.08
   3  19  -1  123.00   21.32
 -19   3  -1  109.05   18.00
  -3 -19  -1  116.10   17.91
  -3 -19   1  117.50   18.83
  19  -3   1  111.98   18.98
 -19   3   1  142.95   21.65
   3  19   1  173.78   25.10
   4  19  -1   67.15   17.53
  -4 -19  -1   86.98   15.49
  19  -4  -1   65.44   16.31
 -19   4  -1   95.77   17.18
   4  19   1   77.75   17.00
 -19   4   1   83.71   17.30
  -4 -19   1   73.92   15.52
  19  -4   1   92.46   16.83
   5  19  -1  114.76   21.41
  19  -5  -1   99.14   18.89
  -5 -19  -1  122.72   18.39
 -19   5  -1   75.86   16.08
  -5 -19   1   72.73   16.06
  19  -5   1   83.52   17.11
   5  19   1  107.51   22.20
 -19   5   1  102.28   18.63
  19  -6  -1  113.56   18.98
 -19   6  -1  131.63   19.21
  -6 -19  -1  128.68   18.58
   6  19  -1  106.00   20.98
 -19   6   1   82.94   17.74
   6  19   1  130.29   23.09
  -6 -19   1  136.43   20.05
  19  -6   1  125.82   19.42
  19  -7  -1    3.47   10.21
   7  19  -1    8.82   10.94
 -19   7  -1    6.23    9.02
  -7 -19  -1    2.31    8.86
 -19   7   1  -12.69    8.07
   7  19   1  -11.15   10.68
  -7 -19   1   11.28    9.48
  19  -7   1    1.52   10.48
 -19   8  -1  134.25   20.63
  19  -8  -1   86.41   18.01
   8  19  -1   68.52   18.74
  -8 -19  -1  114.51   19.27
 -19   8   1  100.17   18.85
  19  -8   1  102.93   19.84
  -8 -19   1   97.80   18.57
   8  19   1  113.41   21.66
  -9 -19  -1   38.84   13.75
  19  -9  -1   23.64   13.38
   9  19  -1   35.09   15.90
 -19   9  -1   52.96   14.62
   9  19   1   49.17   16.42
  -9 -19   1   20.66   11.98
  19  -9   1   24.26   13.54
 -19   9   1    8.78   11.87
 -19  10  -1   42.90   14.09
 -10 -19  -1   32.17   12.45
  19 -10  -1   14.90   12.44
  10  19  -1   52.02   16.96
  19 -10   1   69.22   18.64
 -10 -19   1   24.15   11.48
 -19  10   1   36.49   14.26
  10  19   1   36.32   15.96
  11  19  -1   15.91   13.40
  19 -11  -1   32.63   15.27
 -19  11  -1   40.09   13.42
 -11 -19  -1   20.67   12.85
 -19  11   1   36.70   13.72
  11  19   1   41.46   16.72
 -11 -19   1   42.26   15.28
  19 -11   1   40.64   15.55
 -19  12  -1   84.81   17.89
  12  19  -1   85.45   21.44
  19 -12  -1   55.31   16.71
 -12 -19  -1   88.66   18.21
 -19  12   1   70.82   17.44
  19 -12   1   65.63   17.40
  12  19   1   64.40   19.32
 -12 -19   1   67.44   16.97
 -19  13  -1   13.50   11.38
 -13 -19  -1   33.38   14.65
  19 -13  -1   36.10   15.63
  13  19  -1   30.76   16.33
 -19  13   1   22.33   13.19
 -13 -19   1   46.46   14.79
  13  19   1   46.73   17.67
  19 -13   1   15.98   12.42
  14  19  -1   26.26   15.12
 -19  14  -1   54.53   16.37
 -14 -19  -1   48.12   15.88
  19 -14  -1   19.19   15.56
 -14 -19   1   43.39   15.64
  14  19   1   28.08   15.69
  19 -14   1   43.20   15.90
 -19  14   1   48.31   16.23
 -19  15  -1  132.20   22.43
  15  19  -1  126.80   24.75
  19 -15  -1  193.94   28.70
 -15 -19  -1  171.30   25.03
 -19  15   1  185.34   27.04
  19 -15   1  158.41   27.08
 -15 -19   1  178.07   26.38
  15  19   1  137.74   25.42
  16  19  -1   22.51   16.71
  19 -16  -1   43.26   18.04
 -16 -19  -1   56.23   17.66
 -19  16  -1   31.76   13.91
  19 -16   1   73.77   19.74
 -16 -19   1   45.71   15.94
  16  19   1   97.99   22.01
 -19  16   1   46.62   17.24
 -15  20  -1   64.88   17.66
  20  15  -1   12.32   15.32
 -20 -15  -1   97.84   20.68
  15 -20  -1   19.03   15.50
 -20 -15   1   63.72   17.78
  20  15   1   37.84   17.44
 -15  20   1   41.36   17.23
  15 -20   1   89.95   20.84
 -14  20  -1   73.67   19.07
  14 -20  -1  104.88   22.11
 -20 -14  -1  122.60   21.53
  20  14  -1  114.25   23.08
 -20 -14   1  112.73   20.69
  14 -20   1   68.64   18.12
 -14  20   1   95.54   21.41
  20  14   1  121.87   23.79
  20  13  -1   18.54   15.31
 -13  20  -1   37.08   15.18
 -20 -13  -1   41.20   14.92
  13 -20  -1   57.43   17.88
 -13  20   1   67.50   19.04
  20  13   1   22.51   14.53
  13 -20   1   40.76   15.35
 -20 -13   1   72.61   16.10
 -12  20  -1   21.65   12.89
  20  12  -1   25.77   15.49
  12 -20  -1   11.18   10.68
 -20 -12  -1   31.72   13.90
  20  12   1   11.45   12.49
 -20 -12   1   38.60   12.81
 -12  20   1   21.92   12.83
  12 -20   1   30.02   14.23
  11 -20  -1   60.67   15.57
  20  11  -1   34.30   16.17
 -20 -11  -1   44.73   13.70
 -11  20  -1   32.44   13.61
  20  11   1   31.39   14.62
 -20 -11   1   24.09   11.54
 -11  20   1   29.31   15.21
  11 -20   1   25.00   14.46
  20  10  -1    8.15   12.18
 -20 -10  -1   28.29   12.40
  10 -20  -1   25.24   12.81
 -10  20  -1    4.66   11.07
 -10  20   1   21.14   13.49
 -20 -10   1   12.49    9.10
  10 -20   1    8.56   11.57
  20  10   1    4.34   12.36
   9 -20  -1   26.01   12.68
 -20  -9  -1   69.70   14.62
  -9  20  -1   71.47   17.07
  20   9  -1   63.46   18.04
  20   9   1   42.84   15.39
   9 -20   1   45.13   14.72
  -9  20   1   39.83   16.36
 -20  -9   1   23.20   11.57
   8 -20  -1   25.07   12.45
  20   8  -1   32.41   15.34
 -20  -8  -1   32.31   12.21
  -8  20  -1   36.50   13.96
 -20  -8   1    7.81    9.79
   8 -20   1   16.19    9.54
  20   8   1   21.64   12.78
  -8  20   1   22.24   13.33
   8 -20   1   13.32   10.77
   7 -20  -1   63.74   14.80
   7 -20  -1   68.29   12.75
  20   7  -1   47.67   15.72
  -7  20  -1   75.41   17.28
 -20  -7  -1   76.25   15.81
 -20  -7   1   76.74   15.43
  -7  20   1  135.17   23.43
   7 -20   1   94.56   17.13
  20   7   1   83.88   19.69
   7 -20   1   93.95   16.22
   6 -20  -1  484.27   29.53
  -6  20  -1  470.85   27.97
  20   6  -1  404.87   24.50
  20   6  -1  578.43   37.61
  -6  20  -1  478.40   33.82
 -20  -6  -1  443.36   29.04
   6 -20  -1  449.38   26.16
  20   6   1  481.26   33.83
   6 -20   1  455.44   28.67
 -20  -6   1  500.16   29.00
  -6  20   1  419.81   34.07
   6 -20   1  517.69   30.37
  20   5  -1   92.48   19.55
  -5  20  -1  122.19   16.36
   5 -20  -1  105.22   15.41
  -5  20  -1  107.78   20.43
 -20  -5  -1  105.07   16.40
   5 -20  -1  101.20   16.38
  20   5  -1  109.91   15.78
 -20  -5   1   91.70   15.66
  20   5   1  131.93   21.34
  -5  20   1   95.99   19.85
   5 -20   1  137.06   18.38
   5 -20   1  103.01   17.36
   4 -20  -1  151.56   18.74
  -4  20  -1  165.86   18.86
   4 -20  -1  154.94   18.33
  20   4  -1  152.21   18.47
  20   4  -1  118.58   22.07
  -4  20  -1  159.10   23.72
  20   4   1  168.65   20.67
   4 -20   1  176.98   20.09
 -20  -4   1  161.10   19.17
   4 -20   1  148.79   19.45
  20   4   1  210.54   26.32
  -4  20   1  144.87   23.50
  20   3  -1  141.98   22.92
  20   3  -1  126.16   17.52
   3 -20  -1  153.58   18.34
   3 -20  -1  182.68   19.93
  -3  20  -1  134.74   18.50
  -3  20  -1  149.37   23.06
   3 -20   1  161.10   18.56
   3 -20   1  153.78   19.98
  -3  20   1  130.84   23.58
 -20  -3   1  149.27   17.18
  20   3   1  184.15   24.47
  20   3   1  149.64   19.46
   2 -20  -1    0.32    7.59
  20   2  -1   13.28    9.84
   2 -20  -1   16.75    8.30
  20   2  -1    6.21   11.42
  -2  20  -1    9.89   11.37
  20   2   1    9.32   11.00
  -2  20   1    9.17   11.11
 -20  -2   1    6.19    7.03
   2 -20   1   -7.30    6.67
  20   2   1    0.21    8.23
   2 -20   1    8.66    7.90
  -1  20  -1   12.40   13.48
  20   1  -1   16.00   10.06
   1 -20  -1   20.90    9.59
  20   1  -1   33.00   13.82
   1 -20  -1   19.53    8.98
  20   1   1   24.58   12.05
 -20  -1   1   31.02    9.20
   1 -20   1   35.61   11.30
   1 -20   1   18.95    8.57
  20   1   1   47.35   12.70
  -1  20   1  -14.11    9.15
   0 -20  -1   25.80    9.30
  20   0  -1   34.65   11.61
   0  20  -1   15.38   12.70
   0 -20  -1    9.51    9.03
   0  20   1   36.08   14.37
  20   0   1   21.12   10.72
 -20   0   1   25.86   13.62
 -20   0   1   33.65    9.26
   0 -20   1   43.91   12.95
 -20   1  -1   51.53   14.24
   1  20  -1   73.64   17.22
  20  -1  -1   44.25   12.86
  -1 -20  -1   32.61   11.33
  -1 -20  -1   53.06   16.60
 -20   1   1   36.79   13.28
 -20   1   1   68.24   11.51
  -1 -20   1   51.65   13.65
   1  20   1   51.69   17.42
  20  -1   1   71.15   16.16
   2  20  -1  282.45   31.69
 -20   2  -1  336.39   27.06
  -2 -20  -1  272.25   26.01
  20  -2  -1  321.27   29.93
 -20   2   1  276.05   30.28
 -20   2   1  276.26   19.15
  -2 -20   1  317.76   26.17
   2  20   1  330.91   34.99
  20  -2   1  272.91   27.00
  20  -3  -1  102.05   17.64
  -3 -20  -1  145.52   20.00
   3  20  -1  122.18   23.03
 -20   3  -1  131.91   19.81
  20  -3   1  106.46   19.04
   3  20   1  175.52   26.59
  -3 -20   1  166.26   22.45
 -20   3   1  129.52   21.29
 -20   4  -1   90.55   17.46
  20  -4  -1  105.48   18.84
   4  20  -1   97.68   20.62
  -4 -20  -1   97.92   17.35
 -20   4   1  112.29   20.22
   4  20   1  104.01   21.75
  20  -4   1  104.24   19.09
  -4 -20   1   98.73   17.29
   5  20  -1   84.89   19.51
 -20   5  -1   35.13   12.52
  -5 -20  -1   41.12   13.45
  20  -5  -1   48.01   15.49
  -5 -20   1   50.84   14.62
   5  20   1   40.85   16.86
 -20   5   1   38.20   14.05
  20  -5   1   50.82   15.84
 -20   6  -1    4.61    9.03
  -6 -20  -1    3.82    9.92
   6  20  -1    1.45   11.60
  20  -6  -1   19.42   13.08
  -6 -20   1    1.70   10.14
 -20   6   1    6.83   10.68
   6  20   1   15.82   13.09
  20  -6   1    6.69   11.26
   7  20  -1   74.49   19.01
  -7 -20  -1   81.79   16.64
 -20   7  -1   99.82   17.44
  20  -7  -1   77.64   18.08
  20  -7   1   78.37   17.25
   7  20   1   86.96   19.15
  -7 -20   1  106.58   18.85
 -20   7   1   59.40   16.29
 -20   8  -1  -15.38    7.85
  -8 -20  -1   -5.60    8.63
  20  -8  -1   -6.85   10.17
   8  20  -1   15.55   12.46
   8  20   1   -0.73   11.27
  20  -8   1    4.54   11.26
 -20   8   1   -2.87   10.62
  -8 -20   1    3.71    9.75
  20  -9  -1   93.34   21.02
  -9 -20  -1  134.35   20.82
 -20   9  -1  148.96   22.04
   9  20  -1  115.97   21.53
  -9 -20   1  126.54   20.87
 -20   9   1  100.70   19.90
  20  -9   1  124.98   22.14
   9  20   1  121.70   23.75
 -10 -20  -1  133.51   21.41
  20 -10  -1  127.05   22.67
 -20  10  -1  133.14   21.51
  10  20  -1  163.07   25.73
 -10 -20   1  177.02   24.45
  10  20   1  145.99   25.53
 -20  10   1  180.93   26.87
  20 -10   1  166.57   24.64
 -11 -20  -1   23.30   13.06
 -20  11  -1   21.10   12.42
  20 -11  -1   21.66   13.32
  11  20  -1   11.55   14.15
 -11 -20   1   22.48   13.64
  11  20   1   48.07   16.52
 -20  11   1   17.86   13.00
  20 -11   1   31.65   15.98
  12  20  -1   51.88   18.80
 -20  12  -1   46.45   15.33
  20 -12  -1   63.97   17.64
 -12 -20  -1   62.87   17.44
 -20  12   1   74.68   18.30
  20 -12   1   49.00   18.00
  12  20   1   65.92   19.79
 -12 -20   1   58.02   17.45
  13  20  -1   35.08   16.24
 -20  13  -1   17.23   12.82
 -13 -20  -1   12.78   12.12
  20 -13  -1   23.53   14.89
 -20  13   1   48.41   16.32
  13  20   1   15.58   15.75
  20 -13   1   47.23   18.37
 -13 -20   1   59.33   16.95
  20 -14  -1   28.95   15.20
  14  20  -1   45.44   19.36
 -14 -20  -1   19.26   13.29
 -20  14  -1   28.26   12.72
 -20  14   1   41.48   15.76
  14  20   1   32.56   18.11
 -14 -20   1   41.47   15.54
  20 -14   1   39.97   16.67
 -15 -20  -1   65.21   17.61
  20 -15  -1   46.56   18.21
  15  20  -1   44.56   18.06
 -20  15  -1   67.71   16.60
 -20  15   1   65.38   18.05
  15  20   1   62.54   19.43
 -15 -20   1   59.07   17.36
  20 -15   1   39.93   16.48
 -13  21  -1   41.13   15.22
  21  13  -1   32.85   17.71
 -21 -13  -1   55.15   16.16
  13 -21  -1   56.78   17.80
  21  13   1   67.53   18.64
  13 -21   1   55.72   16.49
 -21 -13   1   53.58   15.23
 -13  21   1   60.38   18.82
 -12  21  -1    7.08   11.07
  12 -21  -1   41.80   15.17
  21  12  -1   28.60   16.72
 -21 -12  -1   15.55   12.11
 -12  21   1    5.90   13.08
  12 -21   1   50.93   15.99
 -21 -12   1   26.92   12.23
  21  12   1   25.73   14.87
  11 -21  -1   32.05   13.62
 -11  21  -1   25.25   14.67
 -21 -11  -1   24.54   12.36
  21  11  -1   25.61   16.03
  21  11   1   33.58   15.17
 -11  21   1   40.08   16.50
  11 -21   1   23.06   13.49
 -21 -11   1   21.68   11.93
  10 -21  -1   38.16   13.76
  21  10  -1   32.26   15.97
 -21 -10  -1   24.75   13.16
 -10  21  -1   48.27   16.46
  10 -21   1   45.45   15.13
 -10  21   1   19.21   14.32
  21  10   1   45.69   16.53
 -21 -10   1   35.47   12.96
  -9  21  -1   -4.96   10.23
  21   9  -1    9.95   12.99
 -21  -9  -1   -4.21    9.15
   9 -21  -1   12.46    9.90
 -21  -9   1   -1.55    8.33
  21   9   1    6.53   11.88
  -9  21   1    3.30    9.81
   9 -21   1   -9.26    9.81
   8 -21  -1   29.86   12.90
  -8  21  -1   42.02   15.13
 -21  -8  -1   45.15   12.55
  21   8  -1   32.84   15.60
  -8  21   1   20.35   13.38
 -21  -8   1   39.28   11.70
  21   8   1   59.66   17.62
   8 -21   1    7.60   11.52
   8 -21   1   41.74   12.07
   7 -21  -1  161.67   22.64
  21   7  -1  250.77   31.33
  -7  21  -1  255.86   30.49
  -7  21  -1  206.34   22.83
 -21  -7  -1  195.93   23.55
 -21  -7   1  198.53   22.76
   7 -21   1  153.30   20.62
  21   7   1  186.11   25.98
   7 -21   1  244.97   25.93
  -7  21   1  202.93   28.79
  -6  21  -1  212.57   22.59
 -21  -6  -1  180.58   22.47
  -6  21  -1  159.60   24.62
  21   6  -1  150.89   24.03
   6 -21  -1  162.92   21.03
   6 -21  -1  139.04   17.66
   6 -21   1  165.56   21.41
   6 -21   1  210.34   23.55
  -6  21   1  158.80   24.71
  21   6   1  196.75   26.09
 -21  -6   1  175.50   20.92
 -21  -5  -1  364.02   25.81
  21   5  -1  282.57   31.53
  -5  21  -1  297.41   22.81
   5 -21  -1  293.04   24.15
  -5  21  -1  257.38   29.67
  21   5  -1  294.41   26.09
   5 -21  -1  347.35   24.47
 -21  -5   1  301.10   23.82
   5 -21   1  335.58   26.18
  21   5   1  284.00   30.58
  -5  21   1  320.79   34.57
   5 -21   1  300.13   24.07
  -4  21  -1   41.65   15.81
 -21  -4  -1   50.01   12.54
  21   4  -1   42.50   16.67
   4 -21  -1   68.97   14.17
  21   4  -1   65.40   13.72
   4 -21  -1   67.58   13.86
  21   4   1   58.98   16.77
  -4  21   1   76.12   18.82
 -21  -4   1   67.48   14.17
   4 -21   1   65.67   14.30
   4 -21   1   65.29   14.06
   3 -21  -1   12.45    8.66
   3 -21  -1    1.40    7.62
  21   3  -1   12.46    9.92
  -3  21  -1   -1.01   10.57
  21   3  -1   -7.38   10.28
   3 -21   1    1.56    7.89
  -3  21   1    6.43   11.19
  21   3   1   -1.82    9.91
 -21  -3   1    0.99    7.93
  21   3   1   16.71   10.34
   3 -21   1   -9.77    7.24
  21   2  -1   43.61   16.00
   2 -21  -1   43.16   11.64
  21   2  -1   24.16   11.72
   2 -21  -1   70.79   13.49
  -2  21  -1   50.85   16.99
  21   2   1   59.02   14.27
   2 -21   1   28.28   11.34
   2 -21   1   56.62   17.93
 -21  -2   1   46.73   11.60
  21   2   1   71.17   17.12
  -2  21   1   33.01   15.07
   1 -21  -1   40.98   10.63
  -1  21  -1   30.04   14.41
   1 -21  -1   24.61   10.27
  21   1  -1   41.44   14.29
  21   1  -1   34.82   11.68
  21   1   1   38.34   12.68
  21   1   1   23.72   12.89
 -21  -1   1   45.54   10.56
  -1  21   1   51.82   16.84
   1 -21   1   29.31   11.73
  21   0  -1   68.37   15.34
 -21   0  -1   89.89   18.24
   0 -21  -1   51.92   13.76
   0  21  -1   73.81   18.75
 -21   0   1  109.66   14.71
   0 -21   1   85.65   16.31
   0  21   1   87.77   19.15
 -21   0   1  100.37   20.05
  21   0   1   87.97   16.78
 -21   1  -1  135.58   20.87
  21  -1  -1  109.54   17.97
  -1 -21  -1  120.64   18.47
   1  21  -1  111.75   21.47
 -21   1   1  101.26   19.17
 -21   1   1  113.10   22.67
  -1 -21   1  105.81   18.26
  21  -1   1  118.59   20.00
   1  21   1  141.01   25.10
 -21   2  -1   69.55   15.33
   2  21  -1   78.32   19.75
  21  -2  -1   60.88   15.72
  -2 -21  -1   87.16   16.18
  21  -2   1   68.67   16.16
   2  21   1   37.81   16.28
  -2 -21   1   57.80   14.98
 -21   2   1   62.74   16.95
  -3 -21  -1  254.83   26.73
 -21   3  -1  208.78   24.89
   3  21  -1  228.07   28.56
  21  -3  -1  206.33   25.88
  -3 -21   1  227.93   26.29
  21  -3   1  268.82   28.86
 -21   3   1  236.46   27.89
   3  21   1  267.11   32.33
 -21   4  -1   58.50   14.63
  -4 -21  -1   27.65   12.44
   4  21  -1   65.51   17.90
  21  -4  -1   78.76   16.74
  21  -4   1   72.63   16.91
  -4 -21   1   62.05   15.34
 -21   4   1   60.04   16.88
   4  21   1   52.82   17.93
  21  -5  -1   35.56   14.50
 -21   5  -1   17.78   11.02
  -5 -21  -1    2.38    9.42
   5  21  -1    9.57   14.04
  21  -5   1   19.66   12.05
  -5 -21   1   11.02   10.97
   5  21   1   20.28   13.02
 -21   5   1   19.86   12.20
  21  -6  -1   75.56   18.16
  -6 -21  -1  128.87   20.84
   6  21  -1   71.45   18.21
 -21   6  -1   88.32   17.77
   6  21   1   70.05   17.71
  -6 -21   1  112.40   19.41
 -21   6   1   83.35   18.33
  21  -6   1   92.03   19.80
  -7 -21  -1    7.53   10.19
  21  -7  -1    3.64   12.03
   7  21  -1    9.07   13.46
 -21   7  -1    6.45    9.18
  -7 -21   1    0.62    9.80
   7  21   1    2.97   11.40
  21  -7   1   15.18   12.36
 -21   7   1   -1.77    9.03
  -8 -21  -1   36.37   13.23
   8  21  -1   32.96   16.50
  21  -8  -1   25.34   15.35
 -21   8  -1   56.13   15.54
  -8 -21   1   35.90   13.94
  21  -8   1   42.68   15.90
 -21   8   1   -0.53   11.60
   8  21   1   18.53   13.78
 -21   9  -1   94.54   18.81
  -9 -21  -1   64.40   16.41
  21  -9  -1   41.86   16.86
   9  21  -1   80.06   20.47
 -21   9   1   51.26   16.91
   9  21   1   79.15   20.48
  -9 -21   1   83.84   17.77
  21  -9   1   89.76   20.11
 -10 -21  -1   46.81   15.51
  21 -10  -1   36.68   16.71
 -21  10  -1   42.18   15.10
  10  21  -1   16.30   14.11
  21 -10   1   28.32   15.02
  10  21   1   26.12   15.33
 -21  10   1   39.60   15.04
 -10 -21   1   36.45   14.36
 -21  11  -1  272.95   30.53
  11  21  -1  220.29   31.35
  21 -11  -1  202.74   28.51
 -11 -21  -1  241.58   29.32
 -21  11   1  189.89   27.53
  11  21   1  248.01   32.66
 -11 -21   1  231.47   28.81
  21 -11   1  189.01   27.66
 -21  12  -1   99.68   19.55
  21 -12  -1  115.63   22.90
  12  21  -1   65.87   20.39
 -12 -21  -1  108.82   21.27
  21 -12   1   50.01   16.58
  12  21   1   75.22   21.01
 -12 -21   1   86.74   19.75
 -21  12   1   51.29   17.15
  13  21  -1   22.49   15.31
 -13 -21  -1   16.00   12.66
  21 -13  -1   12.14   13.98
 -21  13  -1   18.73   12.56
 -21  13   1   19.33   13.24
  13  21   1   -8.64   12.58
  21 -13   1   30.48   15.99
 -13 -21   1   -7.10   10.25
  22  12  -1   59.62   18.96
 -12  22  -1   63.90   17.90
  12 -22  -1   57.61   17.43
 -22 -12  -1   52.22   16.09
  12 -22   1   49.24   16.69
 -22 -12   1   64.76   16.51
  22  12   1   63.62   19.49
  11 -22  -1    0.41   11.80
  22  11  -1   10.35   13.53
 -11  22  -1  -14.03    9.86
 -22 -11  -1  -10.22   10.67
  11 -22   1   17.50   13.02
 -22 -11   1    8.80   10.60
  22  11   1   11.43   12.32
 -11  22   1    5.54   12.66
 -10  22  -1    7.16   12.13
  10 -22  -1   39.58   14.75
  22  10  -1   24.70   15.46
 -22 -10  -1   32.70   14.03
  10 -22   1   19.96   12.71
  22  10   1   31.61   14.84
 -22 -10   1   25.27   11.54
 -10  22   1   30.13   15.25
  22   9  -1   84.83   21.31
 -22  -9  -1   53.24   15.20
   9 -22  -1   78.37   17.71
  -9  22  -1   90.48   18.78
  -9  22  -1   88.07   19.82
 -22  -9   1   79.40   16.50
  -9  22   1   71.03   19.32
  22   9   1   66.17   18.18
   9 -22   1   59.98   15.77
 -22  -8  -1    3.38    9.15
  22   8  -1    3.65   12.71
  -8  22  -1    8.60   10.97
  -8  22  -1   -4.51   10.43
   8 -22  -1    1.87    9.88
  -8  22   1   -5.37   10.76
  22   8   1   -2.89   11.40
 -22  -8   1    8.43    9.08
   8 -22   1    4.99    9.33
  -7  22  -1   83.96   19.71
  -7  22  -1   93.63   16.65
  22   7  -1   67.19   19.27
 -22  -7  -1   77.82   16.36
   7 -22  -1   68.83   16.18
   7 -22   1   53.86   15.54
  -7  22   1   71.81   20.36
 -22  -7   1   67.11   15.26
  22   7   1   57.31   16.91
   7 -22   1   70.62   15.45
 -22  -6  -1   33.67   12.28
   6 -22  -1   34.72   12.96
  22   6  -1   20.93   14.16
  -6  22  -1   18.05   13.41
  -6  22   1   31.87   15.18
   6 -22   1   35.98   12.58
  22   6   1   13.40   13.40
   6 -22   1    8.25   10.54
 -22  -6   1    9.86    9.20
  22   5  -1   63.02   19.01
 -22  -5  -1   57.65   14.91
  -5  22  -1   40.41   16.77
   5 -22  -1   83.19   14.91
   5 -22  -1   93.33   16.97
  22   5   1   74.38   19.44
 -22  -5   1   55.00   13.66
   5 -22   1   89.32   17.37
   5 -22   1  101.33   17.20
  -5  22   1   43.45   16.98
  -4  22  -1   71.38   18.04
   4 -22  -1   36.17   12.87
  22   4  -1   66.33   14.63
  22   4  -1   81.25   20.21
 -22  -4  -1   51.18   13.04
   4 -22  -1   34.16   11.69
  22   4   1   71.40   19.11
  -4  22   1   55.24   18.12
 -22  -4   1   61.09   13.30
   4 -22   1   54.34   13.52
   4 -22   1   79.26   16.26
   3 -22  -1   97.11   16.47
  -3  22  -1   81.72   19.05
  22   3  -1   98.35   21.39
   3 -22  -1   88.76   15.65
 -22  -3  -1   84.16   15.37
  22   3  -1   90.71   16.97
  -3  22   1  100.63   21.35
 -22  -3   1   95.28   15.57
   3 -22   1   94.86   17.77
  22   3   1   96.12   20.04
  22   3   1   62.85   14.46
  -2  22  -1    9.35   13.23
  22   2  -1    4.17   12.12
  22   2  -1   -3.73    8.97
   2 -22  -1   -1.17   12.67
   2 -22  -1    4.17    7.69
  22   2   1    1.95   10.68
  22   2   1    0.83    9.39
 -22  -2   1   -4.55    7.46
   2 -22   1   -2.41    8.71
  -2  22   1    4.64   11.69
   1 -22  -1   47.78   12.91
  22   1  -1   60.79   17.81
  22   1  -1   77.95   16.52
  -1  22  -1   52.03   16.77
  22   1   1   53.91   14.83
 -22  -1   1   85.22   14.49
  -1  22   1   25.49   15.61
  22   1   1   44.08   15.97
   1 -22   1   70.82   16.12
   0  22  -1    1.18   11.74
 -22   0  -1  -12.35    8.53
  22   0  -1    0.32    9.02
   0 -22  -1    2.24    8.75
 -22   0   1    1.39    9.93
   0  22   1   13.76   15.04
  22   0   1   11.13   10.82
   0 -22   1    3.24    8.64
 -22   1  -1   37.53   13.56
   1  22  -1   35.85   15.18
  -1 -22  -1   33.19   12.61
  22  -1  -1   46.20   14.35
 -22   1   1   39.62   14.27
   1  22   1   27.86   14.91
  22  -1   1   41.14   14.45
  -1 -22   1   33.57   12.99
   2  22  -1  111.49   22.92
  22  -2  -1  120.18   20.30
  -2 -22  -1  131.68   20.16
 -22   2  -1  107.65   18.67
  -2 -22   1  112.56   18.67
 -22   2   1  108.76   20.06
  22  -2   1  139.54   21.54
   2  22   1  174.61   28.24
 -22   3  -1   78.72   17.10
   3  22  -1  112.66   23.29
  22  -3  -1  110.58   20.50
  -3 -22  -1  127.10   20.04
   3  22   1  147.68   25.05
  -3 -22   1  115.21   19.84
  22  -3   1  105.52   19.71
 -22   3   1   84.49   18.50
 -22   4  -1   54.26   15.01
  -4 -22  -1   65.57   16.08
   4  22  -1   59.84   18.50
  22  -4  -1   36.68   15.25
  22  -4   1   52.37   16.23
 -22   4   1   47.61   14.98
  -4 -22   1   53.47   15.77
   4  22   1   32.97   16.03
  22  -5  -1   88.47   19.30
   5  22  -1  103.08   21.79
  -5 -22  -1   86.85   17.21
 -22   5  -1   70.59   16.50
   5  22   1  106.62   23.95
  -5 -22   1   83.20   19.00
  22  -5   1   80.07   18.92
 -22   5   1   71.56   18.46
 -22   6  -1   -0.33    9.75
  -6 -22  -1   12.98   10.59
  22  -6  -1    1.71   10.59
   6  22  -1   -4.02   11.92
   6  22   1   -7.55   10.80
 -22   6   1    4.06   10.65
  -6 -22   1    3.41    9.87
  22  -6   1   14.68   12.82
  22  -7  -1   25.65   13.33
 -22   7  -1   49.70   14.37
  -7 -22  -1   20.13   12.08
   7  22  -1   -8.45   11.19
 -22   7   1   38.11   14.98
  22  -7   1   23.26   15.18
   7  22   1   26.40   14.27
  -7 -22   1    8.75   11.05
  22  -8  -1   42.64   15.59
 -22   8  -1   33.10   14.04
  -8 -22  -1   25.46   12.64
   8  22  -1   26.36   15.94
 -22   8   1   42.06   16.36
  22  -8   1   13.81   12.57
   8  22   1   34.56   17.01
  -8 -22   1   38.18   13.63
 -22   9  -1   67.62   17.61
  -9 -22  -1   52.56   16.62
   9  22  -1   65.20   19.27
  22  -9  -1   55.64   16.69
  22  -9   1   52.76   18.37
   9  22   1   36.86   18.31
 -22   9   1   47.10   16.81
  -9 -22   1   53.79   16.43
  22 -10  -1   93.89   22.50
  10  22  -1   77.11   20.64
 -10 -22  -1  103.46   20.21
 -22  10  -1   89.64   18.66
  22 -10   1  128.10   24.82
  10  22   1  108.92   24.83
 -22  10   1   95.53   20.97
 -10 -22   1   84.04   19.90
  11  22  -1   79.32   21.76
 -22  11  -1   80.34   18.57
 -11 -22  -1   54.84   16.25
  22 -11  -1   59.65   19.48
  11  22   1   57.97   18.31
 -22  11   1   71.73   19.10
 -11 -22   1   75.13   19.17
  22 -11   1   57.20   19.27
  12  22  -1   42.33   18.55
  22 -12  -1   80.35   20.90
 -12 -22  -1   46.65   16.38
  22 -12   1   45.62   18.74
  12  22   1   51.37   19.20
 -12 -22   1   41.90   15.69
 -23 -10  -1   35.27   14.14
 -10  23  -1   39.28   15.22
  10 -23  -1   39.14   15.79
 -23 -10   1   28.18   12.14
  10 -23   1   49.30   15.38
  -9  23  -1  110.55   22.53
   9 -23  -1  120.27   22.14
 -23  -9  -1  103.85   19.59
  23   9  -1   84.05   21.24
  -9  23  -1   94.79   18.54
   9 -23   1   84.50   18.52
  23   9   1   78.44   20.35
 -23  -9   1  113.53   19.40
  -9  23   1   96.06   22.82
  23   8  -1   20.35   15.52
 -23  -8  -1   37.33   13.89
   8 -23  -1   43.61   15.55
  -8  23  -1   19.17   14.78
  23   8   1   24.02   14.97
   8 -23   1   14.22   11.64
 -23  -8   1   15.63   10.01
  -8  23   1   20.15   14.93
  -7  23  -1   14.83   14.43
  23   7  -1   -4.57   11.99
 -23  -7  -1    3.66    8.61
   7 -23  -1    2.84   10.02
  23   7   1   -5.34   10.39
  -7  23   1    8.82   13.10
   7 -23   1    7.40   11.13
 -23  -7   1    4.30    8.32
   7 -23   1    3.96    9.57
 -23  -6  -1  114.64   19.26
   6 -23  -1  103.76   18.27
  23   6  -1  132.28   24.18
  -6  23  -1   86.06   20.43
   6 -23   1  108.54   18.10
  23   6   1  115.26   23.82
  -6  23   1  118.67   24.64
 -23  -6   1   95.86   16.88
   6 -23   1  119.76   20.69
  23   5  -1   -4.10   12.43
 -23  -5  -1   -6.50    9.05
  -5  23  -1   11.86   12.85
   5 -23  -1   -0.91   10.43
   5 -23  -1   12.35    9.87
 -23  -5   1   -1.42    8.31
   5 -23   1    0.51    9.34
  23   5   1   -0.15   12.00
  -5  23   1    6.24   11.60
  23   4  -1  102.62   22.28
   4 -23  -1   74.33   15.48
   4 -23  -1   50.46   13.25
  23   4  -1   32.17   20.58
 -23  -4  -1   57.60   14.50
  -4  23  -1   35.67   15.07
  23   4   1   78.30   20.65
  -4  23   1   77.86   21.42
   4 -23   1   76.16   16.72
 -23  -4   1   76.78   15.39
  -3  23  -1   51.57   17.61
  23   3  -1   72.98   15.51
   3 -23  -1   47.73   12.47
  23   3  -1   45.85   17.13
 -23  -3  -1   59.11   13.21
  -3  23   1   35.63   16.83
   3 -23   1   47.67   14.09
 -23  -3   1   50.05   12.77
  23   3   1   52.17   17.42
  -2  23  -1   31.75   15.90
  23   2  -1    4.80   13.14
 -23  -2  -1   15.02   10.09
  23   2  -1   37.55   13.08
   2 -23  -1   24.75   11.31
   2 -23   1   32.60   13.59
  -2  23   1   18.25   14.38
  23   2   1   22.55   12.08
 -23  -2   1   30.92   11.83
  23   2   1   21.94   13.50
  23   1  -1   59.91   15.71
  -1  23  -1   55.57   18.56
   1 -23  -1   61.99   15.18
 -23  -1  -1   64.99   16.86
   1 -23   1   72.28   15.92
 -23  -1   1   83.05   19.56
  23   1   1   75.53   18.23
  -1  23   1   27.16   16.08
   0 -23  -1   72.78   15.65
 -23   0  -1   30.35   13.93
   0  23  -1   72.70   19.02
  23   0  -1   63.56   16.69
   0  23   1   59.97   19.63
  23   0   1   87.07   18.25
   0 -23   1   58.51   15.48
 -23   0   1   77.37   19.28
 -23   1  -1   46.95   15.34
   1  23  -1   34.78   16.21
  -1 -23  -1   38.36   14.29
  23  -1  -1   41.75   14.53
 -23   1   1   34.50   15.19
   1  23   1   66.19   20.64
  23  -1   1   65.30   17.08
  -1 -23   1   36.42   13.55
  23  -2  -1  139.53   22.08
   2  23  -1   47.77   17.05
 -23   2  -1   60.55   16.17
  -2 -23  -1   91.01   18.48
   2  23   1   60.33   17.66
 -23   2   1   47.59   16.22
  23  -2   1   59.19   17.00
  -2 -23   1   81.57   17.43
  -3 -23  -1   35.88   13.67
  23  -3  -1   23.66   13.13
   3  23  -1   31.01   16.85
 -23   3  -1   28.73   13.98
  23  -3   1   28.67   14.04
 -23   3   1   16.60   11.46
   3  23   1   23.68   15.53
  -3 -23   1    9.73   10.64
  -4 -23  -1   20.92   12.16
   4  23  -1   27.81   16.60
  23  -4  -1   22.81   13.12
 -23   4  -1    9.13   11.09
   4  23   1   16.54   16.64
  -4 -23   1   48.12   16.15
  23  -4   1   14.60   13.79
 -23   4   1   31.26   13.75
 -23   5  -1   23.78   12.74
  23  -5  -1    4.81   12.06
   5  23  -1   -6.09   11.66
  -5 -23  -1    3.09   11.00
  -5 -23   1    6.78   11.04
   5  23   1    3.94   13.08
 -23   5   1    2.31   10.21
  23  -5   1   41.64   16.80
  23  -6  -1   32.68   15.57
   6  23  -1   62.73   19.06
 -23   6  -1   30.36   13.60
  -6 -23  -1   18.95   12.60
 -23   6   1    3.22   10.14
  -6 -23   1   43.61   15.52
   6  23   1   45.75   18.78
  23  -6   1   46.64   17.24
  23  -7  -1  114.76   21.89
 -23   7  -1   78.02   18.79
  -7 -23  -1   75.14   17.88
   7  23  -1   90.84   23.14
 -23   7   1   61.73   17.40
   7  23   1   99.53   22.68
  -7 -23   1   42.55   15.73
  23  -7   1   87.46   20.66
   8  23  -1   46.32   17.15
  -8 -23  -1   70.91   18.04
 -23   8  -1   93.17   19.23
  23  -8  -1   42.00   16.85
 -23   8   1   99.88   22.87
  -8 -23   1   68.53   18.19
  23  -8   1   71.70   19.29
   8  23   1   57.32   18.19
  23  -9  -1  -16.28   11.38
 -23   9  -1   -0.65   11.26
   9  23  -1   11.12   13.79
  -9 -23  -1   -0.92   10.69
   9  23   1  -10.91   12.91
  23  -9   1   -9.08   12.11
  -9 -23   1    9.61   11.59
 -23   9   1    5.21   11.49
 -10 -23  -1   69.30   18.45
  23 -10  -1   41.94   17.11
  23 -10   1   66.88   19.05
 -10 -23   1   57.27   17.97
  24   7  -1   34.66   18.27
   7 -24  -1   51.20   16.20
 -24  -7  -1    2.19   10.74
  -7  24  -1   21.79   15.56
  24   7   1   37.61   17.40
  -7  24   1   35.66   16.27
 -24  -7   1   11.84   10.07
   6 -24  -1   -9.58    9.54
 -24  -6  -1   16.26   10.26
  -6  24  -1   15.01   13.74
  24   6  -1  -13.58   11.76
  -6  24   1    4.79   13.40
  24   6   1   12.38   14.60
 -24  -6   1   18.61   10.47
   6 -24   1   -8.37    8.61
 -24  -5  -1   58.68   14.68
  24   5  -1   27.92   16.87
  -5  24  -1   50.00   17.56
  24   5   1   47.27   17.25
 -24  -5   1   45.53   12.33
   5 -24   1   37.95   13.92
  -5  24   1   41.33   19.08
  24   4  -1   43.21   17.14
 -24  -4  -1   47.98   14.14
   4 -24  -1   63.61   14.40
  -4  24  -1   16.62   15.74
  24   4   1   50.18   16.33
  -4  24   1   33.44   16.72
   4 -24   1   15.42   10.74
 -24  -4   1   33.50   12.23
 -24  -3  -1   27.42   11.87
  24   3  -1   16.93   11.87
  24   3  -1    8.08   14.67
   3 -24  -1   35.39   12.86
  -3  24  -1   73.45   20.48
  24   3   1   18.05   14.21
  -3  24   1   54.60   20.24
   3 -24   1   26.99   12.88
  -2  24  -1  114.86   24.40
 -24  -2  -1  145.72   19.22
  24   2  -1  133.31   21.00
   2 -24  -1  101.46   18.36
  -2  24   1  100.34   23.18
  24   2   1  134.61   21.58
   2 -24   1   83.34   18.19
 -24  -2   1  120.12   24.16
  24   1  -1   50.95   15.78
   1 -24  -1   82.22   17.20
 -24  -1  -1   64.62   14.02
 -24  -1  -1   39.95   14.94
  -1  24  -1   74.99   20.40
   1 -24   1   52.89   15.44
  -1  24   1   22.67   16.75
 -24  -1   1   51.70   17.13
  24   1   1   56.80   16.84
   0  24  -1   59.15   18.53
  24   0  -1   34.30   14.90
 -24   0  -1   42.19   15.12
   0 -24  -1   57.31   15.40
 -24   0   1   34.88   15.88
   0 -24   1   26.53   12.72
  24   0   1   42.05   15.96
   0  24   1   31.28   15.69
 -24   1  -1   34.72   14.31
  24  -1  -1   47.49   16.65
   1  24  -1   27.92   15.65
  -1 -24  -1   58.69   16.34
   1  24   1   53.56   17.92
  24  -1   1   42.89   15.74
 -24   1   1   26.90   14.29
  -1 -24   1   45.56   14.76
   2  24  -1   13.66   13.15
 -24   2  -1    4.38    9.90
  24  -2  -1   -7.20   10.66
  -2 -24  -1    8.54   11.23
   2  24   1   -1.32   12.55
  24  -2   1   -1.39   11.00
 -24   2   1   -3.65    9.97
  -2 -24   1   18.61   11.73
   3  24  -1   24.86   14.53
  24  -3  -1   21.49   13.86
  -3 -24  -1   29.09   13.61
 -24   3  -1   18.95   12.48
   3  24   1   11.11   15.17
  -3 -24   1    9.13   10.05
 -24   3   1   18.84   13.30
  24  -3   1   27.55   15.39
 -24   4  -1    4.36   11.70
  -4 -24  -1   17.88   11.86
   4  24  -1   -2.91   12.82
  24  -4  -1   28.37   14.66
   4  24   1    0.74   14.24
  -4 -24   1   38.09   14.05
 -24   4   1   24.21   13.10
  24  -4   1   17.25   15.10
 -24   5  -1   64.08   16.99
  24  -5  -1   59.52   18.09
  -5 -24  -1   37.90   14.87
   5  24  -1   63.20   19.72
  24  -5   1  101.79   21.23
  -5 -24   1   83.25   19.62
   5  24   1   56.97   19.79
 -24   5   1   47.56   16.69
  -6 -24  -1  104.27   20.36
  24  -6  -1  147.75   24.59
   6  24  -1  117.30   24.90
 -24   6  -1   94.65   19.43
  24  -6   1  161.23   27.14
   6  24   1   90.05   23.00
  -6 -24   1   76.41   19.14
 -24   6   1  110.69   22.66
  24  -7  -1   56.27   18.47
  -7 -24  -1   36.21   15.22
   7  24  -1   53.53   20.84
 -24   7  -1   10.09   12.99
  24  -7   1    8.67   13.75
  -7 -24   1   94.26   20.96
 -24   7   1   39.27   14.20
   7  24   1    7.79   14.57
   2 -25  -1   55.02   14.14
 -25  -2  -1   31.30   18.22
  25   2  -1   27.74   12.98
   2 -25   1   32.00   13.77
 -25  -1  -1  103.00   20.56
   1 -25  -1  118.49   20.80
  25   1  -1  113.55   21.40
  -1  25  -1  128.58   25.47
  25   1   1  167.97   25.75
  -1  25   1  120.07   25.48
 -25  -1   1  119.31   24.09
   1 -25   1  132.36   22.65
  25   0  -1   25.52   14.52
 -25   0  -1   46.37   15.88
   0  25  -1   38.46   19.16
   0 -25  -1   65.12   17.09
 -25   0   1   20.39   14.14
   0 -25   1   42.76   14.40
   0  25   1   33.52   17.76
  25   0   1   44.48   17.69
  25  -1  -1   -8.24   11.39
  -1 -25  -1   10.14   10.24
   1  25  -1   12.02   15.60
 -25   1  -1    7.00   10.37
   1  25   1   -3.80   13.68
  25  -1   1   13.37   14.46
  -1 -25   1   15.73   12.05
 -25   1   1   16.34   13.02
  25  -2  -1   23.61   15.41
  -2 -25  -1   51.69   16.39
  25  -2   1   48.16   17.09
  -2 -25   1   39.05   14.40
   0   0  -2 2199.12   51.54
   0   0   2 2202.74   49.16
   1   0  -2  153.09    7.45
   0   1  -2  162.13    8.99
  -1   0  -2  173.48    8.84
   0   1  -2  160.20    6.09
  -1   0  -2  163.58    5.84
   1   0  -2  142.75    8.79
   0  -1  -2  154.22    8.72
   0  -1   2  160.33    7.93
   1   0   2  162.12    5.21
   0   1   2  159.62    7.04
   1   1  -2    0.67    2.41
  -1   1  -2    0.45    1.27
   1   1  -2   -0.35    4.36
  -1   1  -2    1.55    4.20
   1  -1  -2   -0.72    3.94
  -1  -1  -2    4.35    3.67
  -1  -1   2    1.88    2.27
   1  -1   2    0.23    1.23
   1   1   2    3.83    2.12
  -1   1   2    2.34    2.82
  -1   2  -2  778.82   22.21
  -2  -1  -2  782.59   21.74
  -1   2  -2  840.73   23.82
   1  -2  -2  805.41   22.29
   2   1  -2  782.81   22.23
  -1   2  -2  785.03   18.95
   2   1  -2  773.62   22.14
   1  -2   2  771.41   22.83
  -1   2   2  794.75   22.62
  -2  -1   2  803.81   20.97
   2   1   2  791.32   19.76
  -2   0  -2   81.61    7.18
  -2   0  -2   65.23    3.03
   0  -2  -2   85.43    7.23
   2   0  -2   62.52    5.55
   0   2  -2   65.96    4.72
   2   0  -2   75.79    6.93
   0   2  -2   77.80    7.07
   2   0  -2   83.28    7.15
   0   2   2   51.42    5.25
  -2   0   2   72.68    4.67
   2   0   2   63.99    3.09
   1   2  -2 1515.41   36.47
   1   2  -2 1495.86   37.62
  -1  -2  -2 1474.65   37.08
   2  -1  -2 1520.94   38.05
  -2   1  -2 1536.43   37.89
  -1  -2   2 1590.05   37.59
   1   2   2 1550.92   36.63
  -2   1   2 1503.27   38.62
   2   2  -2  878.64   24.41
  -2  -2  -2  862.93   23.57
   2   2  -2  904.82   24.43
  -2   2  -2  861.53   24.74
  -2   2  -2  895.73   20.47
   2  -2  -2  897.14   24.42
  -2  -2   2  897.35   23.96
   2  -2   2  886.61   24.52
   2   2   2  882.82   23.35
  -2   2   2  844.88   25.29
  -2   3  -2 1137.41   27.08
   3   2  -2 1120.94   29.56
   3   2  -2 1091.83   30.37
   3   2  -2 1101.15   26.90
   2  -3  -2 1105.40   30.02
  -2   3  -2 1118.13   30.01
  -3  -2  -2 1145.19   28.75
   3   2   2 1144.01   28.78
  -2   3   2 1089.76   31.36
   2  -3   2 1106.34   29.73
  -3  -2   2 1119.22   29.04
   1  -3  -2 1019.30   27.84
  -3  -1  -2 1046.16   27.36
   3   1  -2 1001.59   25.93
  -1   3  -2 1034.09   25.83
   3   1  -2 1022.57   28.04
   3   1  -2 1076.67   29.18
  -1   3  -2 1038.25   27.87
   1  -3   2 1104.71   29.05
  -3  -1   2 1032.59   26.30
  -1   3   2 1042.61   29.00
   1  -3   2 1031.38   27.07
   3   1   2 1033.96   25.44
  -3   0  -2 1399.19   35.12
   0  -3  -2 1388.98   34.42
   3   0  -2 1365.36   36.47
   0   3  -2 1384.20   34.67
   3   0  -2 1348.81   33.91
   0   3  -2 1364.46   33.56
  -3   0   2 1353.35   32.26
   0  -3   2 1412.60   35.52
   0   3   2 1401.03   35.63
   3   0   2 1406.27   31.19
  -3   1  -2 4210.65   90.08
   1   3  -2 4200.73   94.17
  -3   1  -2 4227.00   94.96
  -1  -3  -2 4243.24   93.52
   3  -1  -2 4146.48   94.18
  -3   1  -2 4571.90   90.75
   1   3  -2 4232.18   94.07
  -3   1   2 4235.14   90.65
   1   3   2 4214.54   94.78
  -1  -3   2 4183.60   94.83
  -3   1   2 4115.86   96.83
   3  -1   2 4192.11   95.34
   3  -2  -2 1130.14   30.26
  -2  -3  -2 1126.18   28.77
   2   3  -2 1112.58   30.24
  -3   2  -2 1137.95   26.18
   2   3  -2 1150.15   29.73
   3  -2  -2 1156.46   25.17
  -3   2  -2 1141.71   30.97
  -2  -3   2 1175.51   30.54
  -3   2   2 1079.56   31.97
   3  -2   2 1149.29   31.00
   2   3   2 1124.82   30.20
   3   3  -2   11.28    2.44
  -3   3  -2   12.32    2.63
   3  -3  -2    9.13    3.91
  -3   3  -2   12.36    4.76
   3   3  -2   17.48    4.69
   3   3  -2   11.77    4.14
  -3  -3  -2    6.07    3.44
  -3  -3   2    7.58    3.18
   3   3   2   13.78    3.80
   3  -3   2    5.70    3.40
  -3   3   2    6.56    4.34
   3  -4  -2   10.24    1.74
   4   3  -2    8.40    2.35
   4   3  -2   13.68    4.05
   4   3  -2    8.35    3.79
  -3   4  -2   14.33    3.18
  -4  -3  -2    6.31    3.20
   3  -4  -2    9.10    4.63
  -4  -3   2    1.20    2.65
   3  -4   2   -0.22    3.12
   4   3   2    6.47    3.51
  -3   4   2    2.81    3.71
  -4  -2  -2  537.40   16.67
  -2   4  -2  541.30   16.36
   4   2  -2  530.53   15.32
   2  -4  -2  553.08   18.46
  -2   4  -2  557.04   18.36
   4   2  -2  533.26   19.04
  -2   4   2  542.29   19.54
   2  -4   2  538.23   17.62
  -4  -2   2  522.96   16.77
   2  -4   2  524.74   18.47
   4   2   2  547.35   16.95
  -4  -2   2  524.15   15.02
   4   1  -2 1484.39   36.39
  -1   4  -2 1484.31   36.87
  -4  -1  -2 1486.23   37.52
   4   1  -2 1541.42   40.30
   1  -4  -2 1499.83   38.30
  -1   4  -2 1502.52   37.92
   1  -4   2 1473.17   38.86
   4   1   2 1490.25   35.99
  -4  -1   2 1512.53   36.23
  -1   4   2 1496.82   39.97
   1  -4   2 1526.69   37.22
   4   0  -2  146.02    8.17
   0  -4  -2  159.08    8.86
   0   4  -2  142.18    8.35
   0   4  -2  155.35    8.58
  -4   0  -2  147.87    9.14
   4   0  -2  161.31   10.31
   0   4   2  164.97    9.80
   0  -4   2  151.81    8.83
   4   0   2  170.12    6.78
  -4   0   2  147.30    6.48
  -4   1  -2   62.45    6.83
   1   4  -2   63.59    4.52
   1   4  -2   73.32    6.86
   1   4  -2   74.68    6.73
   4  -1  -2   61.66    6.76
   4  -1  -2   74.02    8.55
  -1  -4  -2   65.86    5.66
  -1  -4   2   62.85    6.49
   4  -1   2   59.71    4.39
  -4   1   2   58.11    3.63
   1   4   2   72.18    7.44
   4  -1   2   61.71    6.68
   2   4  -2  165.59    9.59
   4  -2  -2  169.25    9.60
   2   4  -2  189.82    9.03
  -2  -4  -2  195.49    8.40
  -4   2  -2  184.55    7.15
  -4   2   2  155.17   10.78
   4  -2   2  164.15    9.95
  -2  -4   2  181.13    9.55
   2   4   2  177.08   10.14
   3   4  -2  284.38   13.51
   4  -3  -2  307.86   13.63
  -4   3  -2  315.34   10.53
  -3  -4  -2  302.20   10.87
   3   4  -2  289.49   11.58
   4  -3   2  279.43   13.24
  -4   3   2  278.10   14.11
   3   4   2  288.93   12.98
  -3  -4   2  292.93   12.81
   4   4  -2   56.11    6.01
   4  -4  -2   58.96    7.74
   4   4  -2   66.84    8.34
  -4  -4  -2   53.50    5.47
   4   4  -2   52.69    3.61
  -4   4  -2   57.36    5.69
   4  -4   2   56.87    6.98
  -4  -4   2   55.32    6.77
  -4   4   2   36.07    6.53
   4   4   2   55.08    7.01
  -4   5  -2  493.56   16.79
   4  -5  -2  499.25   19.47
   4  -5  -2  492.31   12.56
   5   4  -2  503.88   20.15
  -5  -4  -2  484.25   15.49
   5   4  -2  468.49   13.37
  -4   5   2  476.42   20.65
  -5  -4   2  481.83   18.04
   4  -5   2  473.22   18.81
   5   4   2  517.31   19.07
   5   3  -2    2.94    2.25
  -3   5  -2   -0.44    2.82
   3  -5  -2   -4.43    3.13
  -5  -3  -2    3.33    3.39
   5   3  -2    2.85    3.64
   3  -5  -2   -0.57    1.69
   5   3   2    1.32    3.32
  -5  -3   2    6.46    2.41
  -5  -3   2    0.14    3.01
   3  -5   2    3.11    3.45
   3  -5   2   -4.89    3.23
  -3   5   2   -1.25    3.92
   5   2  -2 1523.96   42.83
   2  -5  -2 1583.47   41.28
   2  -5  -2 1625.99   37.10
  -2   5  -2 1580.23   41.00
   5   2  -2 1642.96   38.41
  -2   5  -2 1542.55   39.85
  -5  -2  -2 1603.02   39.80
  -5  -2   2 1571.07   39.61
   5   2   2 1568.37   39.96
  -2   5   2 1576.33   43.64
   2  -5   2 1562.79   40.35
   2  -5   2 1573.30   41.89
   5   1  -2 1554.86   41.84
  -5  -1  -2 1493.48   38.51
  -1   5  -2 1558.22   38.76
  -1   5  -2 1487.24   38.48
   1  -5  -2 1466.11   38.79
   5   1  -2 1537.76   37.65
   5   1   2 1539.45   37.39
  -1   5   2 1454.22   41.21
  -5  -1   2 1469.95   36.77
   1  -5   2 1505.97   37.74
   1  -5   2 1507.25   40.07
   5   0  -2   86.32    7.01
   0   5  -2   88.34    6.95
   0  -5  -2   96.77    7.33
   0   5  -2   91.43    6.96
   5   0  -2  112.68    9.52
   0   5  -2   92.96    7.46
  -5   0   2  102.77    5.62
   5   0   2  101.21    9.09
   5   0   2   96.31    6.27
   0   5   2  113.64   10.25
   0  -5   2  104.11    8.04
   0  -5   2  102.12    6.17
   5  -1  -2  258.00   14.15
   1   5  -2  273.94   11.23
   1   5  -2  288.64    9.51
   1   5  -2  280.83   12.76
   5  -1  -2  283.60   12.49
  -1  -5   2  248.79   12.34
   5  -1   2  273.76   13.01
   1   5   2  276.19   13.46
   5  -1   2  258.63   10.25
  -5   1   2  279.54    8.61
  -2  -5  -2  725.89   19.55
   2   5  -2  724.58   21.05
   5  -2  -2  745.65   23.21
  -5   2  -2  730.93   20.14
   2   5  -2  705.01   17.75
   2   5  -2  688.59   23.16
   5  -2   2  757.11   23.91
  -5   2   2  706.95   16.62
   2   5   2  660.76   23.52
  -2  -5   2  742.51   23.43
  -5   2   2  692.70   25.15
   3   5  -2   78.21    6.41
   3   5  -2   65.60    3.32
  -3  -5  -2   71.36    5.87
   5  -3  -2   69.05    8.23
   3   5  -2   67.90    7.55
  -5   3  -2   63.32    5.76
   3   5   2   65.13    8.10
  -5   3   2   57.90    7.91
   5  -3   2   61.54    7.58
  -3  -5   2   62.97    7.28
   4   5  -2  828.04   23.08
   4   5  -2  788.94   27.06
  -4  -5  -2  819.22   21.83
   5  -4  -2  800.02   26.47
  -5   4  -2  806.66   23.26
  -4  -5   2  823.55   25.82
   4   5   2  798.54   26.80
   5  -4   2  799.48   26.77
  -5   4   2  811.65   28.56
   5  -5  -2    7.07    5.40
   5   5  -2    9.41    2.07
  -5  -5  -2   15.27    4.28
  -5   5  -2    5.51    3.70
   5   5  -2   13.80    5.61
   5  -5   2    6.60    5.53
   5   5   2   11.31    5.31
  -5   5   2   15.91    6.15
  -5  -5   2   15.52    5.27
  -5   6  -2  358.91   15.79
   5  -6  -2  332.77   17.40
  -6  -5  -2  352.94   13.33
   6   5  -2  367.05   19.01
   6   5  -2  361.77   10.82
   5  -6  -2  356.37   10.51
   5  -6   2  377.19   17.92
  -5   6   2  378.08   20.17
  -6  -5   2  371.33   16.97
   6   5   2  362.02   17.68
   4  -6  -2   90.08    5.20
  -4   6  -2   88.95    8.53
   6   4  -2   67.72    9.47
   6   4  -2   86.76    5.86
  -6  -4  -2   95.69    7.84
   4  -6  -2   94.02   10.66
  -4   6   2  111.61   12.62
  -6  -4   2   70.01    5.51
   4  -6   2   87.69    9.63
  -6  -4   2   89.63    9.22
   4  -6   2   87.34    9.26
   6   4   2   92.57    9.93
   6   3  -2   40.93    4.97
  -3   6  -2   38.40    6.20
   3  -6  -2   39.59    4.16
  -6  -3  -2   46.76    6.44
   3  -6  -2   39.44    7.62
   6   3  -2   29.71    6.36
   6   3   2   45.26    6.95
   3  -6   2   35.47    6.37
  -6  -3   2   50.12    6.52
   3  -6   2   50.97    7.13
  -3   6   2   44.62    7.84
   2  -6  -2   58.48    5.20
   6   2  -2   51.68    5.64
   6   2  -2   37.94    7.31
   2  -6  -2   46.91    7.04
  -2   6  -2   53.32    7.04
  -2   6  -2   52.66    6.98
  -6  -2  -2   50.39    6.61
  -6  -2   2   35.55    5.23
   2  -6   2   47.86    6.55
  -2   6   2   45.06    7.71
   2  -6   2   44.47    6.18
   6   2   2   60.12    6.90
   1  -6  -2 1534.14   40.78
   6   1  -2 1568.79   39.57
   1  -6  -2 1550.80   38.30
  -1   6  -2 1542.50   40.01
   6   1  -2 1526.90   43.73
  -1   6  -2 1518.01   40.85
   6   1   2 1565.90   39.58
   1  -6   2 1542.68   41.88
   1  -6   2 1556.07   39.29
   6   1   2 1572.82   41.83
  -6  -1   2 1518.14   38.29
  -1   6   2 1613.26   44.07
   0   6  -2   17.90    4.91
   0   6  -2    8.09    4.31
   6   0  -2    2.97    4.76
   0  -6  -2   11.13    4.14
   6   0  -2    9.75    4.17
   0   6   2    0.19    3.42
   0  -6   2    7.48    3.05
  -6   0   2   13.99    3.05
   0  -6   2    5.77    3.95
   6   0   2    9.91    4.78
   6   0   2   12.37    3.55
  -1  -6  -2  388.65   14.47
   6  -1  -2  348.33   17.16
   1   6  -2  372.63   11.91
   1   6  -2  387.18   13.79
   1   6  -2  377.34   16.35
   6  -1  -2  373.19   15.49
  -1  -6   2  388.87   16.31
  -6   1   2  371.30   11.32
  -1  -6   2  368.40   12.03
   6  -1   2  379.79   16.38
   1   6   2  393.92   17.35
   6  -1   2  344.85   13.64
  -6   2  -2    5.09    3.49
   6  -2  -2   13.86    4.59
   2   6  -2    3.44    4.10
   2   6  -2    8.02    4.11
   2   6  -2   10.02    2.38
   6  -2   2   14.52    5.44
  -6   2   2    9.37    1.93
  -6   2   2   11.21    5.75
  -2  -6   2   11.37    4.24
   2   6   2   12.75    5.24
  -6   3  -2  459.70   15.86
  -3  -6  -2  454.91   13.59
   3   6  -2  448.90   15.36
   3   6  -2  441.40   10.98
   3   6  -2  425.50   18.68
   6  -3  -2  458.71   18.86
   3   6   2  452.19   19.26
  -6   3   2  392.31   19.40
  -3  -6   2  448.88   18.31
   6  -3   2  452.62   19.06
   4   6  -2   90.89    7.71
   6  -4  -2   47.64    7.91
  -4  -6  -2   80.63    6.36
   4   6  -2   55.77    8.46
  -6   4  -2   89.42    8.18
   4   6   2   67.10    9.50
   6  -4   2   60.47    8.70
  -6   4   2   71.63   10.95
  -4  -6   2   68.74    8.43
  -6   5  -2    7.03    4.48
   5   6  -2   -1.91    5.55
  -5  -6  -2    1.57    4.18
   6  -5  -2   -3.58    5.50
   5   6   2    9.59    6.23
  -6   5   2    4.88    6.49
   6  -5   2   -2.78    4.87
  -5  -6   2    9.03    5.49
  -6  -6  -2   14.07    4.67
  -6   6  -2   20.52    5.76
   6  -6  -2   -0.75    6.77
   6   6  -2    0.71    5.64
   6  -6   2    7.04    6.45
  -6   6   2    7.69    6.79
  -6  -6   2   12.93    5.89
   6   6   2   26.12    8.18
   7   6  -2  648.33   27.38
   6  -7  -2  674.25   27.26
   7   6  -2  692.62   17.33
  -7  -6  -2  679.47   20.30
  -6   7  -2  670.39   24.48
  -7  -6   2  673.40   25.51
   6  -7   2  647.24   26.41
  -6   7   2  724.01   29.91
   7   6   2  685.69   27.19
   5  -7  -2 2118.03   48.59
   7   5  -2 2103.01   48.59
  -5   7  -2 2138.82   55.15
   5  -7  -2 2141.89   57.87
  -7  -5  -2 2114.24   51.13
   7   5  -2 2136.23   59.52
   5  -7   2 2121.04   57.18
  -5   7   2 2125.67   60.42
  -7  -5   2 2085.42   48.20
  -7  -5   2 2085.37   55.70
   7   5   2 2130.37   57.29
  -7  -4  -2  259.58   13.09
   4  -7  -2  298.54   10.98
  -4   7  -2  286.45   14.69
   4  -7  -2  285.95   16.07
   7   4  -2  294.90   11.53
   7   4  -2  298.17   17.28
  -7  -4   2  310.21   15.12
   4  -7   2  274.38   15.12
  -4   7   2  265.91   17.88
   7   4   2  315.02   16.20
   4  -7   2  297.39   15.95
   3  -7  -2   16.15    6.90
  -3   7  -2   16.85    5.95
   7   3  -2   18.29    7.06
   3  -7  -2   25.35    4.29
  -7  -3  -2   22.71    6.20
   7   3  -2   21.99    4.91
   7   3   2   26.33    6.39
  -7  -3   2   21.49    5.49
   3  -7   2   19.38    5.59
  -3   7   2   18.56    7.32
   3  -7   2   24.17    6.28
   7   2  -2  283.26   16.42
  -2   7  -2  280.70   14.48
   2  -7  -2  260.39   11.21
  -2   7  -2  268.89   14.12
   7   2  -2  277.80   12.32
   2  -7  -2  284.31   14.63
  -7  -2   2  279.21   12.52
   7   2   2  261.91   13.21
   2  -7   2  295.14   14.52
   2  -7   2  263.13   12.90
  -2   7   2  278.15   16.63
   7   1  -2  737.10   27.18
   7   1  -2  724.30   22.85
   1  -7  -2  723.18   21.77
  -1   7  -2  709.30   22.84
  -1   7  -2  697.97   24.46
   1  -7  -2  683.56   23.51
  -1   7   2  711.46   26.95
   1  -7   2  711.61   22.23
  -7  -1   2  732.45   21.57
   7   1   2  731.90   23.20
   1  -7   2  713.75   24.75
   7   1   2  713.49   24.67
   0  -7  -2 1019.96   29.72
   7   0  -2  969.95   33.35
   7   0  -2 1050.35   30.49
   0  -7  -2 1021.44   29.02
   0   7  -2  990.53   31.73
   0   7  -2 1029.55   28.66
   0  -7   2 1017.47   27.31
   7   0   2  988.25   29.28
  -7   0   2 1044.63   26.93
   7   0   2 1012.40   31.60
   0   7   2  997.28   33.13
   0  -7   2 1016.83   31.51
   7  -1  -2   43.04    8.51
   1   7  -2   67.78    5.73
  -1  -7  -2   55.21    7.05
   1   7  -2   67.22    7.48
  -1  -7  -2   56.84    7.15
   7  -1  -2   69.37    8.60
   1   7  -2   63.58    8.90
   7  -1   2   54.59    8.54
   1   7   2   59.98    9.26
  -1  -7   2   63.63    5.69
  -7   1   2   61.56    5.20
   7  -1   2   63.73    7.55
  -1  -7   2   54.62    8.00
   7  -2  -2  568.08   21.48
  -7   2  -2  516.33   18.96
   2   7  -2  531.38   17.68
   2   7  -2  517.56   14.50
   2   7  -2  577.62   22.48
  -2  -7  -2  540.09   18.50
  -2  -7   2  528.39   21.09
   2   7   2  510.19   22.44
  -7   2   2  524.09   24.02
   7  -2   2  545.35   21.86
  -7   2   2  529.70   14.51
   3   7  -2  439.45   20.51
   3   7  -2  460.73   15.95
   3   7  -2  447.97   11.30
   7  -3  -2  474.39   19.86
  -7   3  -2  428.17   17.01
   3   7   2  471.83   20.74
  -3  -7   2  441.38   19.06
   7  -3   2  438.20   20.18
  -7   3   2  449.13   21.83
  -7   3   2  456.64   11.69
  -4  -7  -2 1162.59   28.13
   7  -4  -2 1094.68   35.88
   4   7  -2 1112.65   36.88
  -7   4  -2 1203.04   33.26
   4   7  -2 1156.06   30.40
  -4  -7   2 1146.65   35.75
   7  -4   2 1184.33   37.27
  -7   4   2 1181.43   39.46
   4   7   2 1212.36   38.50
  -5  -7  -2  185.10    8.38
  -7   5  -2  199.51   12.08
   5   7  -2  198.99   10.08
   7  -5  -2  188.12   14.91
   5   7  -2  170.97   14.32
   7  -5   2  189.90   14.50
  -5  -7   2  184.45   12.95
   5   7   2  180.77   14.60
  -7   5   2  191.03   15.80
  -7   6  -2  271.65   14.24
   7  -6  -2  236.44   16.57
  -6  -7  -2  242.33   10.10
   6   7  -2  262.36   17.21
   6   7   2  264.99   17.00
  -7   6   2  240.07   17.78
   7  -6   2  217.34   15.67
  -6  -7   2  228.94   15.01
  -7  -7  -2  501.43   15.83
   7  -7  -2  534.18   24.15
  -7   7  -2  522.00   21.00
   7   7  -2  506.47   24.07
  -7  -7   2  502.90   22.12
   7  -7   2  447.16   21.96
  -7   7   2  464.55   24.68
   7   7   2  503.24   23.56
  -8  -7  -2  397.27   14.12
   8   7  -2  437.44   22.55
   7  -8  -2  388.95   20.81
  -7   8  -2  408.27   18.94
  -8  -7   2  385.24   19.48
   8   7   2  406.74   21.36
   7  -8   2  332.35   19.23
  -7   8   2  399.43   22.51
  -6   8  -2  563.97   23.03
   6  -8  -2  585.43   17.14
   6  -8  -2  587.81   25.49
   8   6  -2  551.87   16.20
  -8  -6  -2  569.54   18.82
   8   6  -2  570.08   26.33
  -8  -6   2  547.55   15.86
   8   6   2  596.36   25.18
  -8  -6   2  587.10   23.73
  -6   8   2  607.56   27.61
   6  -8   2  570.12   24.63
   5  -8  -2 1038.98   28.04
  -5   8  -2 1084.65   34.34
   5  -8  -2 1084.84   35.84
  -8  -5  -2 1126.69   30.76
   8   5  -2 1021.31   28.01
   8   5  -2 1115.73   38.27
   8   5   2 1073.02   35.84
   5  -8   2 1090.15   35.51
  -5   8   2 1061.83   38.60
  -8  -5   2 1100.22   34.42
   5  -8   2 1112.27   35.56
   4  -8  -2 1064.35   28.47
   8   4  -2  997.24   36.06
  -4   8  -2 1078.49   33.90
   4  -8  -2 1013.88   34.24
  -8  -4  -2 1054.89   30.66
   8   4  -2 1079.55   29.05
  -4   8   2 1115.91   38.41
  -8  -4   2 1109.62   33.48
   4  -8   2 1053.39   33.85
   8   4   2 1100.37   34.60
   4  -8   2 1061.65   34.26
   3  -8  -2  370.97   18.61
   8   3  -2  391.44   20.35
   8   3  -2  377.30   15.32
   3  -8  -2  394.68   14.41
  -3   8  -2  395.28   18.56
   8   3   2  365.24   17.51
  -8  -3   2  416.37   17.05
  -3   8   2  354.67   20.72
   3  -8   2  430.71   18.97
   3  -8   2  378.23   17.38
   8   2  -2   46.71    9.90
   2  -8  -2   43.37    6.10
   2  -8  -2   57.72    8.95
  -2   8  -2   44.53    8.01
   8   2  -2   44.97    6.86
  -2   8  -2   39.97    8.28
   8   2   2   44.91    8.42
   2  -8   2   40.28    7.60
  -2   8   2   48.62    9.94
   8   2   2   44.25    7.45
  -8  -2   2   37.77    6.31
   2  -8   2   43.15    7.17
  -1   8  -2  370.10   18.16
  -1   8  -2  376.08   16.63
   8   1  -2  363.80   16.08
   1  -8  -2  382.18   17.08
   8   1  -2  367.60   19.54
   1  -8  -2  361.96   15.17
   8   1   2  367.68   16.58
  -8  -1   2  354.73   14.74
  -1   8   2  377.92   20.13
   8   1   2  345.08   17.69
   1  -8   2  380.23   17.87
   1  -8   2  356.91   15.07
   0  -8  -2   93.98    8.99
   8   0  -2  100.50   12.42
   0   8  -2  106.78    9.65
   0  -8  -2   93.81    9.66
   8   0  -2   80.79    9.46
   0   8  -2   84.71   10.43
  -8   0   2   95.14    7.60
   8   0   2   94.31    9.79
   0  -8   2   86.64    7.71
   0  -8   2   93.15   10.56
   0   8   2   94.05   11.64
   8   0   2   89.98   10.10
   8  -1  -2  551.28   21.80
   1   8  -2  561.24   19.12
  -1  -8  -2  557.19   20.68
   1   8  -2  566.01   23.46
   8  -1  -2  554.76   25.26
  -1  -8  -2  566.46   20.14
   1   8   2  508.89   24.04
  -1  -8   2  556.73   22.59
  -1  -8   2  571.62   17.30
   8  -1   2  597.11   23.38
  -8   1   2  580.23   17.11
   8  -1   2  531.55   20.71
   8  -2  -2  470.60   21.04
   2   8  -2  500.14   22.55
   2   8  -2  482.67   14.23
  -2  -8  -2  497.26   19.69
   2   8  -2  464.67   17.21
  -8   2  -2  487.86   19.46
  -2  -8  -2  507.18   18.43
  -8   2   2  455.65   23.62
  -2  -8   2  495.66   14.50
  -8   2   2  497.87   14.41
   2   8   2  493.23   22.69
   8  -2   2  496.22   21.38
  -2  -8   2  495.46   21.22
   8  -3  -2   47.81    9.75
   3   8  -2   36.87    6.53
   3   8  -2   43.93    3.44
  -8   3  -2   38.14    6.75
   3   8  -2   49.73    9.53
  -3  -8  -2   49.33    8.18
  -3  -8  -2   41.64    6.64
  -8   3   2   43.03    3.77
  -3  -8   2   33.65    7.15
   3   8   2   19.36    7.22
  -8   3   2   37.67    8.99
   8  -3   2   35.45    8.15
   4   8  -2  253.91   11.53
   4   8  -2  299.55   18.44
   8  -4  -2  261.27   16.43
  -8   4  -2  279.66   14.16
  -8   4   2  262.52   18.40
   4   8   2  226.57   16.37
   8  -4   2  244.81   16.52
  -4  -8   2  279.02   16.30
  -8   4   2  270.36    7.69
   8  -5  -2  283.41   17.31
  -5  -8  -2  297.68    9.33
   5   8  -2  303.64   11.93
   5   8  -2  295.02   17.97
  -8   5  -2  283.69   14.86
   8  -5   2  284.21   17.91
  -5  -8   2  281.05   16.67
   5   8   2  314.09   18.99
  -8   5   2  298.12   19.52
   8  -6  -2  208.35   16.49
  -8   6  -2  249.99   14.22
  -6  -8  -2  241.74    8.71
   6   8  -2  236.38   16.88
   6   8   2  224.88   16.69
   8  -6   2  234.84   15.81
  -8   6   2  223.93   17.51
  -6  -8   2  251.95   15.35
  -7  -8  -2  947.55   25.22
   8  -7  -2 1048.14   36.61
  -8   7  -2  996.52   32.69
   7   8  -2  958.27   37.04
   7   8   2 1039.84   36.77
  -8   7   2  989.56   38.33
   8  -7   2  968.42   35.72
  -7  -8   2 1030.64   34.88
   8  -8  -2   30.44    9.16
   8   8  -2   23.41    8.01
  -8  -8  -2   22.54    4.80
  -8   8  -2   20.85    6.80
   8  -8   2   21.61    8.43
   8   8   2   16.39    7.31
  -8  -8   2   19.20    6.48
  -8   8   2   21.36    8.71
  -9  -8  -2  244.91   10.91
   8  -9  -2  243.35   17.33
   9   8  -2  244.93   19.05
  -8   9  -2  252.94   16.26
   9   8   2  287.98   18.76
  -8   9   2  231.65   19.01
  -9  -8   2  241.83   16.54
   8  -9   2  267.54   18.39
  -7   9  -2    1.42    4.83
   9   7  -2    0.83    2.39
   7  -9  -2    1.40    5.86
   9   7  -2    9.10    6.66
  -9  -7  -2   14.26    4.72
   9   7   2    3.56    5.69
   7  -9   2    6.93    6.42
  -9  -7   2    0.90    5.60
  -9  -7   2    9.37    2.83
  -7   9   2   10.47    7.48
  -6   9  -2   92.86   11.08
   6  -9  -2   74.72    6.21
   9   6  -2   79.99    6.16
   9   6  -2   64.75   11.63
   6  -9  -2   80.78   11.95
  -9  -6  -2  108.24    9.43
  -6   9   2   57.86   11.46
  -9  -6   2   82.30   10.72
   9   6   2   98.39   12.69
   6  -9   2   75.86   11.02
   9   5  -2  854.24   24.15
  -9  -5  -2  821.34   26.06
  -5   9  -2  871.51   30.15
   5  -9  -2  818.69   24.00
   5  -9  -2  802.94   30.89
   9   5  -2  888.53   33.62
   5  -9   2  780.37   29.61
   5  -9   2  864.97   30.21
  -5   9   2  830.16   33.79
  -9  -5   2  803.11   28.98
   9   5   2  826.21   30.81
   4  -9  -2  174.12    9.74
   4  -9  -2  173.80   14.43
   9   4  -2  136.15   14.25
  -4   9  -2  162.40   13.43
   9   4  -2  162.14   10.35
  -4   9   2  193.91   15.84
  -9  -4   2  155.95   12.21
   4  -9   2  174.49   12.71
   9   4   2  171.84   13.33
   4  -9   2  190.91   13.48
   3  -9  -2  296.00   13.22
   9   3  -2  302.47   19.25
  -3   9  -2  285.22   16.86
   9   3  -2  297.02   13.71
   3  -9  -2  277.37   16.65
   9   3   2  320.05   16.80
   3  -9   2  286.38   15.26
  -9  -3   2  300.61   15.17
   3  -9   2  299.90   16.43
  -3   9   2  272.00   19.07
  -2   9  -2  259.04   16.09
   2  -9  -2  235.03   15.10
   2  -9  -2  256.47   12.61
   9   2  -2  270.56   13.93
   9   2  -2  257.33   17.39
  -2   9  -2  231.49   14.56
  -2   9   2  231.30   17.58
   2  -9   2  251.03   13.47
   2  -9   2  257.81   15.42
   9   2   2  245.93   14.68
   9   2   2  237.04   14.48
  -9  -2   2  259.89   13.35
   9   1  -2  644.65   23.72
   1  -9  -2  662.73   24.41
   9   1  -2  707.60   29.12
  -1   9  -2  635.87   23.18
   1  -9  -2  668.00   22.95
  -1   9  -2  678.89   26.57
   1  -9   2  678.81   22.50
   9   1   2  671.88   25.65
  -1   9   2  651.80   28.36
  -9  -1   2  668.67   22.00
   1  -9   2  660.45   25.62
   9   1   2  708.65   25.10
   0   9  -2 1105.48   32.51
   9   0  -2 1153.06   35.27
   9   0  -2 1128.65   39.49
   0  -9  -2 1172.37   34.27
   0   9  -2 1125.97   37.58
   0  -9  -2 1154.45   34.15
   0  -9   2 1179.32   37.00
   9   0   2 1206.32   37.19
  -9   0   2 1150.47   31.19
   0  -9   2 1195.05   31.91
   9   0   2 1111.24   34.87
   0   9   2 1056.43   38.49
  -1  -9  -2  247.72   14.12
   9  -1  -2  246.21   18.18
   9  -1  -2  268.13   15.61
  -1  -9  -2  247.07   13.65
   1   9  -2  234.17   16.50
   1   9  -2  250.06   12.86
  -1  -9   2  259.79   15.85
   1   9   2  243.19   17.85
  -1  -9   2  253.97   10.91
   9  -1   2  269.56   16.43
  -9   1   2  245.79   10.71
   9  -1   2  222.21   14.16
  -2  -9  -2  144.38   10.41
  -9   2  -2  155.87   13.60
   9  -2  -2  158.14   12.39
  -2  -9  -2  145.50   11.68
   2   9  -2  159.14   10.33
   2   9  -2  135.20    7.42
   2   9  -2  136.22   14.59
  -2  -9   2  129.05   12.40
  -9   2   2  137.78   15.99
   9  -2   2  147.07   14.30
   2   9   2  157.31   16.62
  -2  -9   2  157.63    7.61
  -9   2   2  136.51    7.59
   9  -3  -2  280.08   17.35
   3   9  -2  273.17    8.71
   3   9  -2  284.00   12.58
  -9   3  -2  283.53   15.30
  -3  -9  -2  262.28   15.48
   3   9  -2  282.63   18.48
  -3  -9  -2  286.52   13.68
   3   9   2  279.39   18.51
  -3  -9   2  303.04   16.68
   9  -3   2  252.46   16.33
  -9   3   2  282.44   19.32
  -9   3   2  287.47    9.83
  -9   4  -2  624.22   23.83
  -4  -9  -2  649.88   25.38
   9  -4  -2  656.33   27.05
   4   9  -2  679.87   28.49
  -4  -9  -2  670.21   21.69
   4   9  -2  675.75   20.02
  -4  -9   2  654.12   25.96
  -9   4   2  629.51   29.11
   4   9   2  605.11   27.97
   9  -4   2  644.55   27.21
   9  -5  -2   92.04   12.53
   5   9  -2   72.96    6.36
  -9   5  -2   91.70   10.24
   5   9  -2   69.20   11.66
  -5  -9  -2   80.09   10.26
   5   9   2   82.85   12.40
   9  -5   2   79.16   11.63
  -9   5   2   89.68   13.62
  -5  -9   2   79.93   10.50
   9  -6  -2  249.71   17.45
   6   9  -2  220.36   17.46
  -9   6  -2  242.71   14.74
  -9   6   2  259.65   18.97
   6   9   2  247.74   18.22
  -6  -9   2  220.88   15.71
   9  -6   2  266.51   17.97
   7   9  -2  360.59   22.06
   9  -7  -2  353.08   20.32
  -9   7  -2  367.14   18.26
  -9   7   2  343.73   21.67
   9  -7   2  311.61   20.02
  -7  -9   2  336.51   19.46
   7   9   2  365.80   21.71
   9  -8  -2  168.10   16.99
   8   9  -2  137.54   15.80
  -8  -9  -2  145.66    6.97
  -9   8  -2  155.81   14.40
  -8  -9   2  172.08   16.86
  -9   8   2  164.55   18.61
   8   9   2  171.98   17.95
   9  -8   2  132.72   15.60
   9  -9  -2   64.93   12.29
  -9   9  -2   49.89    9.51
  -9  -9  -2   68.92    6.30
   9   9  -2   61.03   12.32
   9   9   2   50.75   10.31
  -9   9   2   68.05   13.06
   9  -9   2   42.37   10.57
  -9  -9   2   49.11    9.82
  -9  10  -2  212.40   16.10
  10   9  -2  260.11   23.93
 -10  -9  -2  219.41   10.39
   9 -10  -2  232.11   18.08
 -10  -9   2  236.65   17.64
  -9  10   2  239.23   22.97
   9 -10   2  220.84   17.73
  10   9   2  211.98   20.49
   8 -10  -2   11.98    8.12
  10   8  -2   32.99   10.13
  -8  10  -2   16.35    7.22
 -10  -8  -2   27.00    5.36
  -8  10   2   15.71    8.83
  10   8   2   10.23    7.87
   8 -10   2   21.04    8.40
 -10  -8   2   20.29    6.83
  10   7  -2  155.59    7.91
  10   7  -2  107.49   14.04
  -7  10  -2  152.27   15.16
   7 -10  -2  148.51   16.12
   7 -10  -2  151.41    8.78
 -10  -7  -2  158.45   10.24
   7 -10   2  150.99   15.47
 -10  -7   2  149.50   14.55
  10   7   2  150.39   15.89
  -7  10   2  174.88   19.00
  10   6  -2  346.65   21.67
   6 -10  -2  320.25   13.19
  10   6  -2  329.84   13.03
 -10  -6  -2  340.39   15.08
  -6  10  -2  304.71   18.05
   6 -10  -2  339.07   19.94
   6 -10   2  345.56   19.50
  -6  10   2  316.70   21.34
  10   6   2  337.86   19.65
 -10  -6   2  313.49   17.95
   6 -10   2  321.61   18.21
  10   5  -2  587.89   19.59
   5 -10  -2  569.33   19.49
  -5  10  -2  595.19   25.43
 -10  -5  -2  575.74   21.29
   5 -10  -2  619.20   26.21
  10   5  -2  579.40   27.73
  -5  10   2  584.65   27.97
   5 -10   2  572.46   24.52
  10   5   2  590.50   25.59
   5 -10   2  563.25   24.42
 -10  -5   2  553.53   23.45
  10   4  -2   11.35    4.53
  -4  10  -2    5.97    5.85
   4 -10  -2   11.71    4.29
   4 -10  -2   -6.15    5.10
  10   4  -2    5.57    7.08
   4 -10   2    9.76    5.26
  -4  10   2    7.15    6.45
   4 -10   2    0.60    5.11
 -10  -4   2   16.70    6.02
  10   4   2   18.50    6.56
   3 -10  -2  757.55   28.32
  10   3  -2  734.39   24.83
   3 -10  -2  768.00   24.43
  -3  10  -2  752.70   29.20
  10   3  -2  729.73   31.11
 -10  -3   2  750.69   26.10
   3 -10   2  774.39   27.07
   3 -10   2  761.41   28.26
  10   3   2  785.40   28.50
  -3  10   2  704.60   30.95
  -2  10  -2   39.35    8.84
   2 -10  -2   46.20    8.49
  10   2  -2   30.88    6.78
  10   2  -2   47.52   10.30
   2 -10  -2   28.95    5.92
  -2  10  -2   35.34    7.80
   2 -10   2   45.24    7.59
   2 -10   2   37.46    7.78
 -10  -2   2   40.19    7.15
  10   2   2   30.70    7.53
  -2  10   2   49.28   10.59
  10   2   2   44.99    8.18
   1 -10  -2  115.09   10.82
  -1  10  -2  111.02   12.89
  10   1  -2  150.84   15.71
   1 -10  -2  123.75   12.17
  10   1  -2  128.16   12.28
  -1  10  -2  135.92   11.87
  10   1   2  126.06   13.47
  -1  10   2  113.62   14.08
   1 -10   2   95.43    9.29
  10   1   2  114.44   12.22
 -10  -1   2  110.07    9.10
   1 -10   2  108.51   12.21
   0  10  -2   65.54    8.45
   0 -10  -2   54.08    7.94
   0  10  -2   41.68    9.16
   0 -10  -2   72.05    9.73
  10   0  -2   62.57    9.72
  10   0  -2   75.21   12.88
   0 -10   2   64.25    9.66
   0 -10   2   69.40    7.61
  10   0   2   54.45    9.76
 -10   0   2   63.89    7.34
   0  10   2   60.17   10.99
  10   0   2   66.49    9.74
  10  -1  -2  486.03   21.92
  -1 -10  -2  518.62   21.11
  10  -1  -2  557.51   26.67
   1  10  -2  459.68   23.39
  -1 -10  -2  518.30   20.05
   1  10  -2  501.62   18.52
  -1 -10   2  500.90   17.02
 -10   1   2  497.97   17.02
  -1 -10   2  495.74   22.43
   1  10   2  504.30   25.34
  10  -1   2  471.09   21.27
  10  -1   2  506.20   22.76
   2  10  -2  227.02   11.78
 -10   2  -2  245.27   15.03
   2  10  -2  227.26   17.25
  10  -2  -2  237.35   15.86
  -2 -10  -2  219.98   14.32
  -2 -10  -2  236.34   12.88
  -2 -10   2  235.30    9.71
  -2 -10   2  249.62   16.00
 -10   2   2  224.53   10.01
   2  10   2  213.45   17.37
  10  -2   2  223.75   15.94
 -10   2   2  213.76   17.15
   3  10  -2 1319.09   44.16
   3  10  -2 1336.97   35.27
  -3 -10  -2 1305.98   41.02
   3  10  -2 1360.25   31.59
  10  -3  -2 1419.12   43.73
  -3 -10  -2 1370.48   37.28
 -10   3  -2 1420.61   41.48
  10  -3   2 1336.69   43.49
   3  10   2 1296.52   44.80
  -3 -10   2 1350.05   42.99
 -10   3   2 1317.40   32.89
 -10   3   2 1344.81   46.94
  10  -4  -2  100.32   13.33
   4  10  -2   98.55   13.58
 -10   4  -2  115.22   11.64
  -4 -10  -2  110.63   12.52
  -4 -10  -2  103.25    9.41
   4  10  -2   98.69    7.63
  10  -4   2  119.29   14.18
  -4 -10   2  128.29   13.31
 -10   4   2  119.67   15.76
   4  10   2   80.79   11.97
  -5 -10  -2  232.31   11.95
   5  10  -2  222.76    9.64
 -10   5  -2  234.74   14.40
   5  10  -2  150.82   15.85
  10  -5  -2  216.61   16.24
  -5 -10  -2  221.87   15.58
  -5 -10   2  226.91   15.68
  10  -5   2  215.29   16.20
   5  10   2  257.62   18.68
 -10   5   2  219.16   17.46
  -6 -10  -2    7.13    5.79
 -10   6  -2    0.31    4.48
  10  -6  -2    4.16    6.29
   6  10  -2   -3.58    6.54
  10  -6   2    5.42    6.72
   6  10   2   -5.65    5.02
 -10   6   2    0.21    5.92
  -6 -10   2   -0.84    5.26
 -10   7  -2   78.76   10.69
  -7 -10  -2   91.37   12.13
   7  10  -2   89.95   14.37
  10  -7  -2   91.10   12.53
 -10   7   2   86.20   15.33
   7  10   2   66.46   11.51
  10  -7   2   91.98   13.36
  -7 -10   2   78.54   11.28
  -8 -10  -2  112.78   14.07
   8  10  -2   95.35   14.56
 -10   8  -2  108.62   12.66
  10  -8  -2  110.23   15.43
   8  10   2  109.96   15.40
  -8 -10   2   82.49   11.94
  10  -8   2   96.63   13.31
 -10   8   2  110.84   16.54
  10  -9  -2  651.18   30.96
  -9 -10  -2  672.92   29.58
   9  10  -2  652.40   31.97
 -10   9  -2  643.77   27.70
  10  -9   2  630.20   29.89
   9  10   2  647.50   31.59
 -10   9   2  573.06   30.84
  -9 -10   2  600.70   28.69
  10  10  -2    3.15    8.06
  10 -10  -2   15.21    8.74
 -10 -10  -2    3.15    7.59
 -10 -10  -2    7.47    3.53
 -10  10  -2   14.83    7.10
  10 -10   2    6.39    7.24
 -10  10   2    6.88    8.11
 -10 -10   2    8.18    7.28
  10  10   2    0.20    7.14
  11  10  -2   25.28   10.45
 -10  11  -2   48.48   10.68
 -11 -10  -2   75.93    7.06
 -11 -10  -2   25.73    9.61
  10 -11  -2   63.90   13.85
  11  10   2   43.21   11.74
  10 -11   2   38.75   11.54
 -11 -10   2   54.09   10.80
 -10  11   2   58.11   14.18
 -11  -9  -2  193.99   10.64
  -9  11  -2  159.59   16.60
  11   9  -2  185.19   20.04
   9 -11  -2  222.99   21.77
  11   9   2  143.76   17.50
 -11  -9   2  193.45   18.48
  -9  11   2  215.30   22.44
   9 -11   2  196.51   19.69
  -8  11  -2  333.50   20.56
  11   8  -2  345.65   23.41
   8 -11  -2  310.46   21.65
 -11  -8  -2  360.68   15.11
  11   8   2  341.32   22.39
 -11  -8   2  352.40   20.81
  -8  11   2  359.93   24.45
   8 -11   2  341.62   21.73
   7 -11  -2    0.80    3.05
  11   7  -2    3.56    3.27
  -7  11  -2   -7.67    5.42
   7 -11  -2    8.64    7.07
 -11  -7  -2   -6.65    4.27
  11   7  -2   -4.18    6.25
 -11  -7   2    1.11    5.86
  11   7   2    2.06    6.50
   7 -11   2   -2.16    5.89
  -7  11   2    7.63    7.43
  -6  11  -2  344.44   20.50
   6 -11  -2  355.14   15.21
 -11  -6  -2  380.04   16.83
   6 -11  -2  364.92   21.61
  11   6  -2  383.27   23.71
  11   6  -2  373.17   14.89
   6 -11   2  360.59   20.45
 -11  -6   2  362.65   19.78
   6 -11   2  364.10   19.88
  -6  11   2  378.12   24.10
  11   6   2  368.52   21.33
   5 -11  -2  162.34   10.35
  11   5  -2  160.20   10.33
  -5  11  -2  155.49   15.44
   5 -11  -2  150.46   15.49
  11   5  -2  175.94   19.20
 -11  -5   2  187.89   13.81
  11   5   2  128.55   14.38
  -5  11   2  202.61   21.04
   5 -11   2  148.13   14.49
   5 -11   2  166.59   13.54
   4 -11  -2  237.83   16.37
  11   4  -2  279.43   19.29
  11   4  -2  250.48   13.15
   4 -11  -2  262.13   13.18
  -4  11  -2  228.58   16.65
   4 -11   2  257.39   16.07
   4 -11   2  242.61   15.91
  11   4   2  260.42   16.96
  -4  11   2  256.33   19.39
 -11  -4   2  226.91   14.81
  -3  11  -2   66.08   10.92
   3 -11  -2   72.35    8.62
  11   3  -2   71.08    8.75
  11   3  -2   81.07   13.26
   3 -11  -2   49.46    9.08
   3 -11   2   68.17    9.92
 -11  -3   2   82.82    9.44
  11   3   2   83.80   11.44
   3 -11   2   71.91    9.61
  -3  11   2   53.82   11.01
  -2  11  -2  353.80   17.27
   2 -11  -2  331.17   15.93
  11   2  -2  359.69   22.04
  -2  11  -2  348.54   20.22
  11   2  -2  369.79   17.57
   2 -11  -2  347.46   18.56
   2 -11   2  330.27   16.53
  11   2   2  332.04   18.57
  11   2   2  338.62   18.66
  -2  11   2  371.35   22.34
   2 -11   2  343.44   18.54
 -11  -2   2  368.80   16.64
  -1  11  -2  459.41   19.38
  11   1  -2  499.38   25.90
   1 -11  -2  459.07   19.64
  -1  11  -2  452.35   23.07
  11   1  -2  453.37   20.46
   1 -11  -2  456.60   20.44
  11   1   2  452.76   21.46
  11   1   2  426.01   21.37
 -11  -1   2  471.81   18.23
  -1  11   2  499.65   25.91
   1 -11   2  468.89   22.06
   1 -11   2  451.81   18.58
  11   0  -2  599.16   29.12
  11   0  -2  564.70   24.18
   0 -11  -2  559.67   22.75
   0 -11  -2  594.59   23.28
   0  11  -2  605.63   27.44
   0  11  -2  619.28   21.75
  11   0   2  609.39   25.16
   0  11   2  597.65   28.72
   0 -11   2  596.06   20.64
 -11   0   2  589.27   20.44
   0 -11   2  609.19   25.84
  11   0   2  607.89   25.80
   1  11  -2   76.92    8.77
  11  -1  -2   81.11   13.70
  11  -1  -2   66.37   10.28
  -1 -11  -2   63.44    8.60
  -1 -11  -2   64.25    9.21
   1  11  -2   74.39   12.20
 -11   1   2   58.82    6.75
  -1 -11   2   56.41    9.94
  -1 -11   2   51.46    6.38
  11  -1   2   62.83   10.15
  11  -1   2   45.94    9.43
   1  11   2   59.95   11.81
   2  11  -2  487.88   17.83
   2  11  -2  488.36   24.96
  -2 -11  -2  513.54   19.78
  11  -2  -2  503.87   23.48
  -2 -11  -2  503.96   22.21
 -11   2  -2  513.67   22.90
  11  -2   2  499.14   23.99
  -2 -11   2  484.33   16.00
   2  11   2  493.83   26.07
 -11   2   2  517.70   16.92
  -2 -11   2  454.49   22.65
 -11   2   2  528.54   27.08
  -3 -11  -2   -1.94    4.74
   3  11  -2   11.93    3.27
   3  11  -2    9.53    7.31
  -3 -11  -2    7.97    4.41
   3  11  -2   14.83    4.74
  11  -3  -2   10.80    6.96
 -11   3  -2    9.66    5.45
   3  11   2   10.63    7.31
  -3 -11   2   13.01    6.31
  -3 -11   2    8.53    2.90
 -11   3   2    9.76    3.28
 -11   3   2   -6.57    6.21
  11  -3   2    2.09    5.80
  -4 -11  -2  195.32   14.78
 -11   4  -2  199.79   14.19
  11  -4  -2  194.24   15.60
   4  11  -2  204.83    9.85
  -4 -11  -2  203.83   11.39
   4  11  -2  184.81   15.87
  11  -4   2  219.50   17.09
  -4 -11   2  200.12   15.59
 -11   4   2  214.90   21.17
   4  11   2  189.93   19.22
   5  11  -2   -1.14    7.20
  11  -5  -2   -1.86    6.64
   5  11  -2    7.53    3.42
 -11   5  -2    0.68    4.93
  -5 -11  -2    7.46    4.25
  -5 -11  -2    4.95    6.03
  -5 -11   2   11.58    6.23
  11  -5   2    7.18    6.89
   5  11   2    5.92    6.59
 -11   5   2    8.36    6.93
 -11   6  -2  202.59   14.59
  -6 -11  -2  195.84   11.09
  11  -6  -2  155.32   16.54
   6  11  -2  228.54   21.83
  -6 -11  -2  181.86   17.06
  -6 -11   2  185.59   15.06
   6  11   2  178.85   18.72
 -11   6   2  215.33   21.60
  11  -6   2  160.18   16.69
 -11   7  -2   63.79   10.30
  11  -7  -2   68.95   12.14
   7  11  -2   60.05   11.56
  -7 -11  -2   59.00   10.72
   7  11   2   65.12   12.28
 -11   7   2   48.90   12.21
  11  -7   2   68.67   11.95
  -7 -11   2   61.85   11.32
 -11   8  -2  251.31   17.31
  11  -8  -2  303.53   20.85
   8  11  -2  260.95   21.57
  -8 -11  -2  320.03   20.15
  -8 -11   2  288.91   19.84
   8  11   2  266.11   20.97
 -11   8   2  355.90   24.23
  11  -8   2  312.43   21.63
  11  -9  -2  115.51   16.61
 -11   9  -2   93.31   12.65
  -9 -11  -2   86.02   13.20
   9  11  -2   76.93   14.48
 -11   9   2  117.72   17.78
  11  -9   2  114.73   16.04
   9  11   2   98.65   15.86
  -9 -11   2  119.18   15.26
  11 -10  -2  203.09   21.47
 -10 -11  -2  203.09   20.38
  10  11  -2  178.87   20.58
 -11  10  -2  210.54   17.09
  11 -10   2  212.38   21.81
  10  11   2  186.96   20.79
 -10 -11   2  204.69   19.96
 -11  10   2  204.26   23.40
  11 -11  -2   36.29   12.01
 -11  11  -2   17.40    8.76
 -11 -11  -2    2.58    8.11
  11  11  -2    9.45    9.38
 -11 -11   2   22.14    9.42
  11 -11   2   30.79   10.57
  11  11   2   12.14    8.55
 -11  11   2   16.69    9.93
  11 -12  -2  136.71   18.42
 -12 -11  -2  164.79   19.34
 -11  12  -2  173.25   18.86
  12  11  -2  148.32   21.15
 -12 -11   2  194.86   20.64
  11 -12   2  136.42   17.99
 -11  12   2  161.54   21.09
  12  11   2  137.89   19.03
 -10  12  -2   41.83   11.34
  10 -12  -2   38.67   11.32
 -12 -10  -2   44.00   11.34
  12  10  -2   36.93   12.88
 -12 -10  -2   45.60    6.74
  12  10   2   52.63   12.57
 -10  12   2   63.32   13.92
  10 -12   2   47.86   12.75
 -12 -10   2   32.06   10.08
 -12  -9  -2  364.71   15.51
  12   9  -2  359.51   26.13
  -9  12  -2  346.63   22.17
   9 -12  -2  344.47   24.29
 -12  -9   2  388.60   23.13
  12   9   2  404.58   25.44
  -9  12   2  381.88   26.52
   9 -12   2  344.40   23.50
   8 -12  -2  216.43   20.88
  12   8  -2  184.20   20.41
   8 -12  -2  206.90   11.77
  -8  12  -2  214.08   19.64
 -12  -8  -2  197.32   12.27
   8 -12   2  213.82   21.15
  12   8   2  170.66   18.64
 -12  -8   2  216.68   17.25
  -8  12   2  217.03   23.44
 -12  -7  -2  236.14   13.94
  12   7  -2  214.60   11.13
  -7  12  -2  182.72   18.27
  12   7  -2  220.79   22.45
   7 -12  -2  205.20   19.38
   7 -12  -2  199.70   11.63
 -12  -7   2  193.54   16.04
   7 -12   2  189.63   18.91
  12   7   2  227.30   18.59
  -7  12   2  270.46   25.53
  -6  12  -2  175.08   17.84
   6 -12  -2  105.06   14.41
 -12  -6  -2  127.42   12.04
   6 -12  -2  110.71   10.20
  12   6  -2  110.99    9.95
  12   6  -2  149.30   18.59
  12   6   2  113.31   15.06
  -6  12   2  117.19   16.52
   6 -12   2  151.35   15.23
 -12  -6   2  158.97   15.34
   6 -12   2  116.34   13.77
   5 -12  -2  189.99   12.01
  12   5  -2  214.13   21.44
   5 -12  -2  209.49   17.01
  -5  12  -2  200.61   16.70
  12   5  -2  209.08   12.35
   5 -12   2  202.94   15.54
 -12  -5   2  199.55   14.95
   5 -12   2  190.81   15.34
  -5  12   2  202.35   20.78
  12   5   2  199.51   16.86
   4 -12  -2  139.14   14.84
  12   4  -2  134.63   10.89
   4 -12  -2  130.75   10.49
  12   4  -2  147.09   17.81
  -4  12  -2  163.00   16.50
  12   4   2  159.42   16.47
   4 -12   2  175.13   14.29
   4 -12   2  148.21   14.28
  -4  12   2  121.19   15.66
 -12  -4   2  151.02   13.72
  12   3  -2  248.31   14.72
   3 -12  -2  269.14   16.98
  -3  12  -2  244.85   15.89
  12   3  -2  247.28   19.67
  -3  12  -2  220.17   17.41
   3 -12  -2  219.63   13.56
 -12  -3   2  231.61   14.53
  -3  12   2  211.97   18.20
   3 -12   2  273.89   17.17
  12   3   2  265.01   17.77
  12   3   2  265.23   16.87
   3 -12   2  247.65   15.63
  -2  12  -2  136.17   15.31
   2 -12  -2  136.63   11.33
  -2  12  -2  150.71   13.79
   2 -12  -2  128.41   13.57
  12   2  -2  118.46   15.70
  12   2  -2  142.60   11.86
   2 -12   2  137.82   14.22
 -12  -2   2  122.81   11.43
  -2  12   2  129.70   15.82
  12   2   2  154.06   15.49
  12   2   2  130.54   13.64
   2 -12   2  127.88   12.03
  12   1  -2  611.43   25.22
   1 -12  -2  624.83   25.28
   1 -12  -2  650.73   24.85
  -1  12  -2  620.22   23.51
  12   1  -2  626.43   30.43
  -1  12  -2  655.38   28.93
  12   1   2  606.60   26.43
  -1  12   2  654.13   31.11
   1 -12   2  599.14   22.69
   1 -12   2  629.25   27.14
  12   1   2  601.97   26.47
 -12  -1   2  609.55   22.48
  12   0  -2  814.16   30.94
   0  12  -2  895.07   35.48
  12   0  -2  863.05   36.31
   0 -12  -2  847.65   29.56
   0 -12  -2  846.00   30.10
   0  12  -2  824.99   27.31
 -12   0   2  824.50   26.63
  12   0   2  840.06   32.17
   0 -12   2  850.18   32.70
  12   0   2  831.27   31.92
   0  12   2  882.13   36.82
   0 -12   2  832.84   26.64
  -1 -12  -2  146.12   13.92
  -1 -12  -2  144.51   11.44
   1  12  -2  123.92   15.56
   1  12  -2  128.30   10.30
  12  -1  -2  129.62   16.89
  12  -1  -2  168.33   15.83
  12  -1   2  138.49   15.53
 -12   1   2  145.28    9.68
  -1 -12   2  133.62    9.08
   1  12   2  121.80   15.98
  -1 -12   2  158.94   16.16
  12  -1   2  147.74   15.23
  -2 -12  -2    3.48    5.16
  12  -2  -2    4.43    6.46
   2  12  -2   -1.00    6.99
 -12   2  -2    9.86    6.24
   2  12  -2    4.24    4.74
  -2 -12  -2    4.88    4.57
 -12   2   2   -0.28    6.64
 -12   2   2    4.61    3.66
   2  12   2   10.67    6.87
  -2 -12   2    6.64    6.02
  -2 -12   2    2.43    3.22
  12  -2   2    0.18    5.36
  -3 -12  -2  302.31   18.03
  -3 -12  -2  269.32   14.20
   3  12  -2  268.82   19.45
 -12   3  -2  299.79   17.84
  12  -3  -2  303.78   19.66
   3  12  -2  285.06   12.67
   3  12  -2  285.78   11.58
  -3 -12   2  263.22   18.27
 -12   3   2  287.80   11.78
 -12   3   2  291.45   21.46
  -3 -12   2  284.16   10.54
  12  -3   2  274.06   18.53
   3  12   2  295.58   21.12
  -4 -12  -2  429.98   17.71
   4  12  -2  423.73   15.22
  12  -4  -2  510.34   25.40
 -12   4  -2  432.19   21.84
   4  12  -2  440.77   25.43
  -4 -12  -2  437.38   22.77
 -12   4   2  454.21   26.67
   4  12   2  451.17   26.70
  12  -4   2  429.35   24.31
  -4 -12   2  493.95   24.50
   5  12  -2  198.18   20.33
  12  -5  -2  234.28   20.97
  -5 -12  -2  196.81   16.05
   5  12  -2  213.42    9.05
 -12   5  -2  196.40   15.07
  -5 -12  -2  225.39   12.04
  -5 -12   2  204.64   16.79
 -12   5   2  223.57   22.84
   5  12   2  155.97   17.63
  12  -5   2  257.21   19.22
 -12   6  -2  274.84   17.85
  -6 -12  -2  239.07   18.17
  12  -6  -2  251.69   19.93
  -6 -12  -2  258.41   13.02
   6  12  -2  243.98   19.85
  12  -6   2  286.81   20.79
  -6 -12   2  257.84   19.06
   6  12   2  265.36   20.67
 -12   6   2  274.60   21.73
  -7 -12  -2  138.90   15.79
   7  12  -2  155.73   19.28
 -12   7  -2  164.48   16.30
  12  -7  -2  152.13   18.56
  -7 -12  -2  122.19    9.98
  12  -7   2  138.42   17.55
  -7 -12   2  156.28   17.22
   7  12   2  111.39   15.95
 -12   7   2  212.75   22.58
   8  12  -2  262.40   22.41
 -12   8  -2  265.27   18.56
  -8 -12  -2  272.31   20.12
  12  -8  -2  259.03   21.21
  -8 -12  -2  251.33   13.10
   8  12   2  270.86   22.39
  -8 -12   2  231.02   19.04
  12  -8   2  255.76   20.10
 -12   8   2  242.04   24.09
  -9 -12  -2   46.35   11.56
  12  -9  -2   49.41   11.69
   9  12  -2   33.18   11.54
 -12   9  -2   57.30   11.00
   9  12   2   62.03   14.28
 -12   9   2   53.03   12.62
  12  -9   2   36.08   11.01
  -9 -12   2   51.31   10.86
  12 -10  -2   22.24   11.40
  10  12  -2   29.03   12.23
 -12  10  -2    8.63    7.65
 -10 -12  -2   15.37    9.75
 -12  10   2   23.54   11.14
  10  12   2   15.84   11.12
 -10 -12   2   28.02    9.49
  12 -10   2   14.65    8.64
 -11 -12  -2  196.76   20.68
  11  12  -2  162.25   20.57
 -12  11  -2  165.07   18.23
  12 -11  -2  214.10   23.23
  11  12   2  244.69   26.20
 -11 -12   2  231.16   22.27
 -12  11   2  183.10   22.03
  12 -11   2  210.00   22.94
  12  12  -2   29.22   12.71
  12 -12  -2    7.42   10.38
 -12 -12  -2   24.33    9.58
 -12  12  -2   12.69    8.15
  12  12   2   21.56   11.37
  12 -12   2   29.10   11.94
 -12  12   2   -7.25    7.97
 -12 -12   2    6.87    8.64
 -12  13  -2  232.82   22.46
  12 -13  -2  238.59   24.75
  13  12  -2  256.57   27.59
 -13 -12  -2  219.37   23.02
  12 -13   2  266.35   27.21
 -13 -12   2  227.06   23.03
  13  12   2  259.14   25.98
 -12  13   2  234.89   27.15
  13  11  -2   10.72   10.63
  11 -13  -2    1.06    9.49
 -11  13  -2   14.69    8.31
 -13 -11  -2   19.38   10.03
  11 -13   2   12.43   10.27
  13  11   2   30.62   11.80
 -13 -11   2   12.42    8.84
 -11  13   2    1.90    8.99
 -13 -10  -2   46.74    8.65
  13  10  -2   40.42   13.42
 -10  13  -2   28.25   10.13
  10 -13  -2   24.05   11.20
 -13 -10  -2   39.87   10.79
  13  10   2   34.85   12.00
 -10  13   2   30.90   11.33
 -13 -10   2   33.51   10.23
  10 -13   2   32.29   12.21
   9 -13  -2  132.03   17.43
  -9  13  -2  116.36   16.08
 -13  -9  -2  135.11   11.55
  13   9  -2   91.49   17.29
  -9  13   2  102.22   17.89
  13   9   2  118.74   17.53
   9 -13   2  141.71   18.17
 -13  -9   2   88.08   13.72
   8 -13  -2  449.22   18.93
   8 -13  -2  468.47   27.32
  -8  13  -2  473.84   26.37
  13   8  -2  495.25   30.09
 -13  -8  -2  483.48   19.89
 -13  -8   2  479.87   25.66
   8 -13   2  470.32   26.71
  -8  13   2  400.11   27.56
  13   8   2  508.81   28.40
  13   7  -2   13.78    4.79
 -13  -7  -2   28.26    7.60
   7 -13  -2    9.20    5.00
  -7  13  -2   -0.16    7.27
  13   7  -2   15.59    9.98
   7 -13  -2   26.36   10.35
   7 -13   2   15.37    8.27
  -7  13   2   10.20    9.50
  13   7   2    6.98    7.53
   7 -13   2    9.86    6.09
 -13  -7   2   21.34    7.77
  13   6  -2  214.22   22.31
   6 -13  -2  184.14   12.47
  -6  13  -2  233.11   18.24
   6 -13  -2  195.17   18.90
  13   6  -2  199.94   12.32
   6 -13   2  179.83   18.20
   6 -13   2  192.01   15.68
 -13  -6   2  207.73   16.42
  -6  13   2  174.52   20.71
  13   6   2  228.26   18.46
  13   5  -2  143.52   18.92
   5 -13  -2  102.11   10.67
   5 -13  -2  102.71   14.22
  13   5  -2  100.86   10.72
  -5  13  -2   95.74   14.21
  -5  13   2   98.54   16.02
 -13  -5   2   93.46   11.82
   5 -13   2   89.58   12.65
  13   5   2   78.75   12.80
   5 -13   2   93.50   12.31
  -4  13  -2  395.99   23.70
  13   4  -2  410.51   19.01
   4 -13  -2  387.63   21.98
  13   4  -2  387.91   25.38
   4 -13  -2  384.41   18.58
   4 -13   2  388.72   20.57
  13   4   2  403.36   22.77
 -13  -4   2  418.14   20.57
  -4  13   2  391.78   25.74
   4 -13   2  420.25   22.15
  13   3  -2   33.12    9.96
  -3  13  -2   44.54   10.35
  13   3  -2   51.24    8.81
   3 -13  -2   34.43    8.87
   3 -13  -2   43.90    8.29
  -3  13  -2   65.37   10.74
  13   3   2   36.29    9.47
   3 -13   2   58.68   10.41
   3 -13   2   48.22    8.92
  -3  13   2   52.62   13.12
  13   3   2   49.40    9.84
 -13  -3   2   56.91    9.31
  -2  13  -2  190.62   18.80
   2 -13  -2  239.77   15.16
  13   2  -2  201.56   14.73
   2 -13  -2  231.90   16.13
  13   2  -2  261.23   20.74
  -2  13  -2  216.53   15.19
  -2  13   2  265.96   25.21
 -13  -2   2  231.17   14.29
   2 -13   2  243.69   16.97
  13   2   2  235.66   17.18
   2 -13   2  210.08   14.45
  13   2   2  248.50   17.79
   1 -13  -2  415.22   20.23
   1 -13  -2  446.05   21.15
  13   1  -2  448.22   26.61
  13   1  -2  413.59   21.50
  -1  13  -2  479.47   25.52
  -1  13  -2  462.56   19.99
  13   1   2  418.50   22.51
  13   1   2  407.81   22.26
 -13  -1   2  406.78   18.48
   1 -13   2  441.61   23.08
  -1  13   2  472.11   27.48
   1 -13   2  417.76   18.89
  13   0  -2   95.09   15.03
   0 -13  -2  122.30   12.97
   0  13  -2  111.45   15.68
  13   0  -2  119.31   13.90
   0 -13  -2  134.15   13.40
   0  13  -2  128.79   10.97
  13   0   2  126.69   15.14
 -13   0   2  135.51   10.26
   0  13   2  149.31   17.57
  13   0   2  137.68   15.93
   0 -13   2  143.28   15.09
   0 -13   2  123.20    9.89
   1  13  -2    6.73    5.55
  13  -1  -2    7.25    7.73
  -1 -13  -2    6.70    5.35
  -1 -13  -2   21.66    7.16
   1  13  -2    8.38    7.04
  13  -1  -2   -3.79    5.62
  -1 -13   2   17.34    4.94
   1  13   2   13.49    9.06
  -1 -13   2    3.82    6.55
 -13   1   2   16.29    4.98
  13  -1   2   13.32    7.73
  13  -1   2   10.18    6.88
 -13   2  -2  213.34   16.75
   2  13  -2  177.09   18.63
   2  13  -2  226.13   12.28
  -2 -13  -2  224.75   13.74
  13  -2  -2  239.57   17.89
  -2 -13  -2  200.77   15.48
  -2 -13   2  229.71   17.64
 -13   2   2  215.50   21.93
  -2 -13   2  216.24   10.75
 -13   2   2  234.80   11.80
  13  -2   2  206.49   16.88
   2  13   2  206.97   20.72
   3  13  -2  161.29   10.12
  -3 -13  -2  148.00   15.44
  13  -3  -2  175.77   17.68
  -3 -13  -2  173.69   12.15
   3  13  -2  172.37   18.73
 -13   3  -2  146.01   15.68
 -13   3   2  151.15    9.18
  13  -3   2  171.70   17.51
   3  13   2  160.36   18.41
  -3 -13   2  185.88   18.48
 -13   3   2  177.52   20.33
  -3 -13   2  162.78    8.27
  -4 -13  -2  435.68   17.95
   4  13  -2  407.09   14.59
  -4 -13  -2  382.42   22.08
   4  13  -2  393.81   24.84
  13  -4  -2  404.64   24.10
 -13   4  -2  439.10   22.70
  -4 -13   2  431.01   24.06
  13  -4   2  390.39   23.58
 -13   4   2  410.82   26.39
 -13   4   2  413.11   14.57
   4  13   2  407.08   26.87
   5  13  -2   31.82    4.48
   5  13  -2   35.63   10.78
  13  -5  -2   44.89   10.72
  -5 -13  -2   39.42    6.81
  -5 -13  -2   42.34    9.88
 -13   5  -2   44.01    9.75
   5  13   2   37.24   11.11
  13  -5   2   26.96    9.53
  -5 -13   2   34.06   10.05
 -13   5   2   46.89   12.92
   6  13  -2  138.04   18.22
  -6 -13  -2  175.45   11.39
  13  -6  -2  176.20   19.93
 -13   6  -2  191.19   15.94
  -6 -13  -2  176.11   17.88
  -6 -13   2  151.89   16.93
  13  -6   2  181.16   19.42
 -13   6   2  171.32   20.93
   6  13   2  167.52   19.45
   7  13  -2 1199.02   47.98
  13  -7  -2 1142.39   45.45
 -13   7  -2 1256.29   43.00
  -7 -13  -2 1244.80   45.03
  -7 -13  -2 1205.53   34.37
   7  13   2 1249.52   48.95
  -7 -13   2 1190.95   45.10
  13  -7   2 1217.67   46.56
 -13   7   2 1189.71   48.62
  -8 -13  -2   77.75   14.24
  13  -8  -2   80.48   15.15
   8  13  -2   93.04   16.53
 -13   8  -2   51.11   11.45
  -8 -13  -2   76.37    8.79
  -8 -13   2   54.01   11.35
  13  -8   2   88.39   15.87
   8  13   2   75.33   15.71
 -13   8   2   61.74   14.57
  13  -9  -2    5.92    8.85
 -13   9  -2    1.55    6.77
  -9 -13  -2    6.66    4.82
  -9 -13  -2    6.82    8.80
   9  13  -2   17.00   10.78
  -9 -13   2    2.69    7.71
 -13   9   2   -4.33    9.04
  13  -9   2   10.61    9.82
   9  13   2    1.55    8.77
  13 -10  -2  221.53   24.16
 -13  10  -2  221.27   18.55
  10  13  -2  244.59   25.31
 -10 -13  -2  266.16   24.21
  10  13   2  287.30   27.45
 -13  10   2  305.21   25.52
  13 -10   2  244.19   24.46
 -10 -13   2  270.55   21.82
 -11 -13  -2    8.56    8.85
 -13  11  -2    7.71    7.50
  11  13  -2   -2.58    9.90
  13 -11  -2    7.76   10.16
 -13  11   2   -8.53    8.49
  13 -11   2    6.55    9.74
  11  13   2   19.35   11.75
 -11 -13   2   -5.03    6.86
  13 -12  -2  198.79   23.38
 -13  12  -2  193.30   20.12
 -12 -13  -2  205.60   22.53
  12  13  -2  141.35   21.15
 -12 -13   2  178.61   20.48
  12  13   2  157.48   21.02
 -13  12   2  188.29   23.70
  13 -12   2  165.53   20.86
 -13  13  -2   21.63    9.66
  13  13  -2   24.29   12.52
 -13 -13  -2    5.45    9.29
  13 -13  -2   12.50   11.93
  13  13   2   33.02   13.75
  13 -13   2   22.61   11.58
 -13 -13   2   10.86    8.93
 -13  13   2    1.57    9.10
  14  13  -2  133.11   20.54
 -14 -13  -2  130.27   18.64
  13 -14  -2  147.31   22.33
 -13  14  -2  141.90   18.91
  14  13   2  176.01   23.65
 -13  14   2  133.10   21.05
  13 -14   2  167.55   23.13
 -14 -13   2  130.64   19.10
  12 -14  -2  239.74   25.63
 -14 -12  -2  227.44   24.51
 -12  14  -2  242.81   23.62
  14  12  -2  229.67   26.27
 -14 -12   2  251.14   24.83
  14  12   2  252.71   26.69
  12 -14   2  219.28   23.53
 -12  14   2  238.56   27.26
 -11  14  -2  132.56   18.03
 -14 -11  -2  156.54   19.70
  14  11  -2  119.52   19.13
  11 -14  -2   98.58   17.18
 -14 -11   2  113.83   16.23
  14  11   2  116.59   18.59
  11 -14   2  126.03   19.29
 -11  14   2  129.38   20.75
 -10  14  -2    5.39    8.11
 -14 -10  -2   -1.04    8.10
  10 -14  -2   -0.05    9.12
  14  10  -2    8.23   11.01
  10 -14   2    4.34    9.05
 -10  14   2   12.33    9.18
 -14 -10   2    2.64    7.82
  14  10   2    4.28    9.44
 -14  -9  -2  241.23   14.33
  14   9  -2  241.51   26.57
  -9  14  -2  233.03   19.94
   9 -14  -2  243.57   23.46
  14   9   2  193.41   22.09
 -14  -9   2  244.88   22.57
  -9  14   2  226.89   26.23
   9 -14   2  243.59   23.06
 -14  -8  -2   -3.98    6.06
   8 -14  -2    3.03    9.18
   8 -14  -2    1.70    4.36
  -8  14  -2   -5.40    6.93
  14   8  -2    2.31    8.60
  14   8   2    0.00    7.61
   8 -14   2   -8.03    8.08
 -14  -8   2   -3.67    6.55
  -8  14   2   -4.22    8.00
  14   7  -2  124.20   10.38
   7 -14  -2  122.94   11.98
 -14  -7  -2  146.49   13.94
  -7  14  -2  126.74   16.73
   7 -14  -2  103.94   15.53
  14   7  -2  114.51   17.35
 -14  -7   2  103.75   13.95
   7 -14   2  124.60   15.74
  -7  14   2  133.78   19.96
  14   7   2  119.28   16.60
   7 -14   2  131.03   16.42
   6 -14  -2    4.00    8.28
   6 -14  -2   18.46    6.27
  -6  14  -2   23.36    9.78
  14   6  -2    8.77    9.67
  14   6  -2    5.70    5.25
  14   6   2   25.48    9.56
   6 -14   2   24.15    8.60
  -6  14   2   31.69   11.47
   6 -14   2    7.19    6.65
 -14  -6   2   18.37    7.88
  -5  14  -2   63.03   12.54
   5 -14  -2   59.66    8.69
  14   5  -2   52.96   13.32
   5 -14  -2   44.26   10.85
  14   5  -2   44.22    8.29
   5 -14   2   65.78   11.47
  14   5   2   47.45   10.98
  -5  14   2   86.61   16.18
 -14  -5   2   57.58   10.19
   5 -14   2   42.37    9.98
   4 -14  -2   37.53    8.25
   4 -14  -2   49.01   10.64
  14   4  -2   53.39    9.08
  -4  14  -2   55.50   11.79
  14   4  -2   48.91   13.06
  -4  14  -2   44.30   10.65
   4 -14   2   35.84    9.11
  14   4   2   50.69   11.84
   4 -14   2   55.69   10.42
  -4  14   2   58.19   13.50
 -14  -4   2   30.04    8.63
   3 -14  -2   79.84   10.71
  14   3  -2   93.35   12.07
  -3  14  -2   77.67   11.53
   3 -14  -2   92.13   13.05
  14   3  -2   98.16   16.48
  -3  14  -2   88.64   14.78
   3 -14   2  103.07   14.47
   3 -14   2   90.33   11.70
  14   3   2  103.69   13.40
 -14  -3   2   89.16   11.95
  14   3   2  109.57   14.96
  -3  14   2  113.99   17.67
  -2  14  -2   -4.19    6.51
  -2  14  -2    1.80    7.57
   2 -14  -2    6.96    6.25
  14   2  -2   -1.06    5.42
   2 -14  -2    1.15    4.72
  14   2  -2   -0.08    7.84
  14   2   2   -3.79    5.51
   2 -14   2    1.95    5.63
  -2  14   2   -4.03    7.47
  14   2   2   -5.09    6.47
 -14  -2   2   -3.97    4.97
   2 -14   2    5.35    5.92
   1 -14  -2  373.62   19.84
  -1  14  -2  375.44   23.28
  14   1  -2  358.21   25.05
  14   1  -2  335.98   20.28
   1 -14  -2  376.54   19.72
  -1  14  -2  318.88   17.72
  14   1   2  307.49   20.48
   1 -14   2  358.10   17.62
  -1  14   2  380.67   25.80
 -14  -1   2  347.96   17.52
  14   1   2  343.50   21.15
   1 -14   2  358.53   21.42
  14   0  -2   71.16   12.13
   0 -14  -2   92.56   11.92
  14   0  -2   78.58   14.33
   0  14  -2   78.68   14.52
   0 -14  -2   80.93   11.67
   0  14  -2   91.32   10.56
  14   0   2   67.97   11.74
  14   0   2   81.45   13.42
   0 -14   2   72.66    8.91
   0 -14   2   79.92   12.07
 -14   0   2   76.82    9.12
   0  14   2   62.01   12.60
  14  -1  -2  422.78   26.87
  -1 -14  -2  351.40   20.46
  -1 -14  -2  430.48   19.98
  14  -1  -2  414.08   23.07
   1  14  -2  368.21   24.74
   1  14  -2  372.31   17.26
   1  14   2  310.33   23.64
  14  -1   2  420.04   22.89
  -1 -14   2  410.99   23.55
  14  -1   2  347.54   22.17
 -14   1   2  397.93   17.24
  -1 -14   2  403.44   16.74
   2  14  -2   44.67   12.27
   2  14  -2   44.26    7.57
  -2 -14  -2   34.75    8.80
  14  -2  -2   33.94   10.09
 -14   2  -2   46.22   10.18
  -2 -14  -2   36.84    8.18
   2  14   2   46.43   12.06
  -2 -14   2   31.25   10.14
  -2 -14   2   39.39    6.19
 -14   2   2   46.93    6.98
 -14   2   2   43.26   11.42
  14  -2   2   45.05   10.85
   3  14  -2   95.80   15.62
 -14   3  -2  118.96   14.92
   3  14  -2  113.12    9.16
  14  -3  -2  140.42   17.18
  -3 -14  -2  140.49   15.51
  -3 -14  -2  139.71   12.79
  -3 -14   2  129.60    7.94
  -3 -14   2  135.85   16.89
 -14   3   2  140.61    9.57
   3  14   2  136.38   18.35
  14  -3   2  113.59   16.75
 -14   3   2  140.58   19.29
 -14   4  -2   60.23   11.54
   4  14  -2   65.13   13.78
  -4 -14  -2   60.91   11.28
   4  14  -2   79.40    7.29
  -4 -14  -2   52.66    8.34
  14  -4  -2   53.20   12.06
 -14   4   2   73.81    7.15
   4  14   2   58.33   14.79
  -4 -14   2   61.99   11.81
 -14   4   2   62.02   13.55
  14  -4   2   64.38   13.09
 -14   5  -2  124.30   15.43
   5  14  -2  124.35   17.97
  -5 -14  -2  130.48   11.50
  14  -5  -2  107.83   16.75
  -5 -14  -2  106.18   14.33
  14  -5   2   78.32   13.91
  -5 -14   2  132.36   16.15
   5  14   2  107.62   17.68
 -14   5   2  104.42   16.74
  -6 -14  -2   76.28   13.67
  -6 -14  -2  118.12   10.88
  14  -6  -2   62.45   14.62
 -14   6  -2   77.94   12.47
   6  14  -2   78.52   15.15
 -14   6   2   46.67   13.10
   6  14   2   71.00   14.65
  -6 -14   2  100.15   15.55
  14  -6   2  100.62   16.79
  -7 -14  -2  273.07   21.36
   7  14  -2  291.83   23.38
 -14   7  -2  259.76   19.80
  14  -7  -2  233.37   23.40
  -7 -14  -2  273.25   13.62
   7  14   2  270.28   23.14
  14  -7   2  311.46   23.21
 -14   7   2  289.63   24.63
  -7 -14   2  265.10   21.49
   8  14  -2  236.52   25.17
  14  -8  -2  250.54   23.91
 -14   8  -2  238.68   19.17
  -8 -14  -2  210.32   12.06
  -8 -14  -2  215.03   21.88
  14  -8   2  254.30   25.26
 -14   8   2  278.64   27.87
   8  14   2  178.72   21.86
  -8 -14   2  203.23   21.40
   9  14  -2  213.29   24.67
  -9 -14  -2  147.17   18.07
  -9 -14  -2  168.27   10.79
  14  -9  -2  161.19   19.99
 -14   9  -2  151.07   17.33
 -14   9   2  151.72   20.87
  14  -9   2  185.07   21.98
   9  14   2  141.64   20.46
  -9 -14   2  163.76   19.99
 -14  10  -2    5.93    7.36
  14 -10  -2  -17.89    8.42
 -10 -14  -2   15.64    8.89
  10  14  -2   -3.22    7.98
 -10 -14  -2    7.34    8.62
  10  14   2   -4.18    9.88
 -14  10   2    7.10    9.76
 -10 -14   2    5.35    8.83
  14 -10   2   -0.73    9.46
  14 -11  -2  215.06   23.51
  11  14  -2  257.55   27.66
 -14  11  -2  210.85   21.06
 -11 -14  -2  212.13   23.15
 -11 -14   2  164.84   19.69
  14 -11   2  209.54   23.53
  11  14   2  208.12   25.06
 -14  11   2  224.39   26.73
 -12 -14  -2   20.91    9.91
  12  14  -2   36.53   14.38
 -14  12  -2   42.17   11.70
  14 -12  -2   52.88   14.44
 -12 -14   2   65.68   14.39
  14 -12   2   39.28   12.38
  12  14   2   41.79   14.21
 -14  12   2   48.02   14.09
  14 -13  -2   76.43   16.96
 -14  13  -2   73.67   14.56
  13  14  -2  111.23   20.64
 -13 -14  -2   56.47   14.50
 -14  13   2   87.30   18.51
 -13 -14   2   76.35   15.75
  13  14   2   62.22   16.55
  14 -13   2   53.41   14.07
 -14  14  -2   30.97   12.12
 -14 -14  -2   18.29   10.61
  14 -14  -2   27.54   12.85
  14  14  -2   37.33   15.78
 -14 -14   2   45.60   12.85
 -14  14   2   27.64   13.39
  14 -14   2   22.69   12.52
  14  14   2   37.78   14.74
  15  14  -2  102.27   20.54
  14 -15  -2   98.79   18.42
 -14  15  -2   87.93   16.38
 -15 -14  -2   95.20   18.16
 -15 -14   2   96.08   17.76
 -14  15   2   65.14   17.31
  14 -15   2  100.92   19.41
  15  14   2  105.58   20.12
  15  13  -2  188.97   25.65
 -15 -13  -2  213.90   24.53
 -13  15  -2  175.71   21.56
  13 -15  -2  176.99   23.20
  13 -15   2  192.65   23.51
 -15 -13   2  131.87   19.70
 -13  15   2  205.35   26.54
  15  13   2  177.06   25.34
  15  12  -2  216.30   27.91
  12 -15  -2  255.35   26.78
 -15 -12  -2  247.40   25.35
 -12  15  -2  252.83   25.17
  15  12   2  212.10   25.83
 -15 -12   2  271.78   26.16
 -12  15   2  209.91   26.66
  12 -15   2  245.58   26.41
 -11  15  -2   34.32   11.48
  11 -15  -2   18.71   12.21
 -15 -11  -2   10.78    9.76
  15  11  -2    6.04   10.11
 -15 -11   2   24.70   10.45
  15  11   2    7.67   10.88
  11 -15   2   23.61   12.02
 -11  15   2   49.27   14.99
  15  10  -2  183.44   24.10
 -15 -10  -2  203.46   22.03
  10 -15  -2  196.92   23.32
 -10  15  -2  193.46   21.65
  10 -15   2  205.90   22.55
 -15 -10   2  160.03   19.09
 -10  15   2  149.74   21.33
  15  10   2  191.14   22.67
 -15  -9  -2   28.26    8.16
  15   9  -2   40.65   14.75
   9 -15  -2    9.68   10.54
  -9  15  -2   20.87   10.19
 -15  -9  -2   21.43   10.09
  -9  15   2   43.51   14.23
  15   9   2    8.03   10.06
 -15  -9   2    7.68    8.20
   9 -15   2   10.94    9.16
  15   8  -2   79.83   16.72
   8 -15  -2  101.57   16.02
 -15  -8  -2  106.07   12.73
   8 -15  -2  121.92   12.12
  -8  15  -2  115.02   17.34
   8 -15   2  114.04   16.68
  15   8   2  110.50   17.42
  -8  15   2   91.06   18.03
 -15  -8   2  102.22   14.90
  15   7  -2   86.83   10.56
   7 -15  -2   75.94   14.78
  15   7  -2  106.21   18.73
 -15  -7  -2   74.01   11.50
   7 -15  -2   89.57   10.89
  -7  15  -2   87.77   15.61
  15   7   2   49.25   12.84
 -15  -7   2   89.16   13.86
  -7  15   2   97.79   17.54
   7 -15   2   73.78   13.73
   7 -15   2   87.97   13.84
  -6  15  -2  181.49   19.87
  15   6  -2  142.53   19.03
   6 -15  -2  156.56   14.36
   6 -15  -2  172.95   19.40
  15   6  -2  171.90   12.95
  -6  15   2  216.30   25.37
 -15  -6   2  134.59   15.64
   6 -15   2  166.23   18.46
  15   6   2  139.06   17.81
   6 -15   2  181.96   18.81
  -5  15  -2  201.17   21.81
   5 -15  -2  154.41   14.26
  15   5  -2  152.32   20.41
  15   5  -2  145.95   14.11
   5 -15  -2  114.38   15.67
   5 -15   2  158.37   16.77
 -15  -5   2  155.73   16.19
  -5  15   2  142.96   21.47
  15   5   2  130.01   17.53
   5 -15   2  168.99   18.04
  -4  15  -2  171.26   17.32
   4 -15  -2  180.80   14.16
  15   4  -2  153.70   19.56
  -4  15  -2  187.67   20.90
  15   4  -2  170.99   13.88
   4 -15  -2  203.52   19.45
  15   4   2  175.45   19.49
   4 -15   2  184.05   19.30
 -15  -4   2  185.88   14.97
  -4  15   2  128.18   18.61
   4 -15   2  190.12   17.53
  15   3  -2    1.33    8.36
  -3  15  -2    9.61    8.43
  -3  15  -2    6.50    7.48
  15   3  -2    1.34    6.01
   3 -15  -2   -5.73    6.50
   3 -15  -2   -1.00    4.96
   3 -15   2   -2.06    5.53
  15   3   2    4.66    6.70
 -15  -3   2   -9.70    4.89
   3 -15   2    4.51    6.51
  -3  15   2    8.12    9.69
  15   3   2    1.75    7.15
  15   2  -2   33.22   11.77
  -2  15  -2   30.28   11.17
   2 -15  -2   29.20    9.43
  15   2  -2   27.54    8.70
  -2  15  -2   53.98    9.85
   2 -15  -2   39.81    8.84
  15   2   2   38.04   10.56
   2 -15   2   40.31    9.76
 -15  -2   2   39.81    8.50
  15   2   2   28.40   10.11
  -2  15   2   29.16   12.28
   2 -15   2   40.68    8.80
   1 -15  -2   43.85    9.23
  15   1  -2   36.15   12.56
  15   1  -2   19.64    8.14
  -1  15  -2   29.87    8.22
   1 -15  -2   46.99    9.51
  -1  15  -2   22.72   10.10
  15   1   2   46.43   10.82
 -15  -1   2   40.44    8.20
   1 -15   2   38.58   10.29
  -1  15   2   22.47   11.40
  15   1   2   53.22   11.38
   1 -15   2   28.32    7.37
  15   0  -2  225.24   17.68
   0 -15  -2  199.07   15.36
   0  15  -2  184.12   21.15
  15   0  -2  213.68   22.58
   0  15  -2  194.24   13.84
   0 -15  -2  200.32   16.34
   0 -15   2  218.98   20.32
   0 -15   2  227.42   14.03
 -15   0   2  210.40   13.47
  15   0   2  202.09   19.78
   0  15   2  175.71   20.84
  15   0   2  212.62   21.52
  15  -1  -2  157.34   19.81
   1  15  -2  187.06   13.00
  -1 -15  -2  150.36   14.64
  15  -1  -2  180.69   18.57
   1  15  -2  173.99   20.62
  -1 -15  -2  151.57   16.28
  15  -1   2  158.23   17.92
  -1 -15   2  183.45   20.00
  15  -1   2  207.52   20.65
 -15   1   2  158.50   11.65
  -1 -15   2  160.69   11.38
   1  15   2  189.41   22.87
   2  15  -2  178.40   21.09
   2  15  -2  140.16   10.98
  -2 -15  -2  158.45   14.55
 -15   2  -2  157.06   18.13
  -2 -15  -2  159.22   16.79
  15  -2  -2  169.48   19.08
   2  15   2  156.48   20.54
  -2 -15   2  161.76   18.20
  15  -2   2  159.11   18.92
 -15   2   2  114.54   18.48
 -15   2   2  162.39   11.31
  -2 -15   2  168.12   10.40
   3  15  -2   41.11   12.55
 -15   3  -2   45.90   11.21
   3  15  -2   76.30    8.42
  15  -3  -2   52.49   12.71
  -3 -15  -2   57.65    9.31
  -3 -15  -2   63.63   11.66
  -3 -15   2   71.09   13.20
 -15   3   2   40.84   12.00
   3  15   2   44.53   12.13
  -3 -15   2   62.30    6.54
 -15   3   2   61.71    7.83
  15  -3   2   34.81   10.83
   4  15  -2  132.51   13.30
 -15   4  -2  138.19   16.63
  15  -4  -2  133.76   17.90
  -4 -15  -2  141.53   11.57
  -4 -15  -2  141.00   16.18
   4  15  -2   73.20   14.56
 -15   4   2  101.16   18.68
  15  -4   2   96.17   15.48
   4  15   2  136.76   20.27
 -15   4   2  112.30    8.88
  -4 -15   2  129.51   17.02
   5  15  -2  -13.19    6.01
 -15   5  -2   -3.65    6.07
  -5 -15  -2   -1.47    5.01
  -5 -15  -2   -3.14    7.12
  15  -5  -2    0.62    7.57
  -5 -15   2    9.20    8.05
 -15   5   2   -2.08    3.42
 -15   5   2   -8.26    8.16
   5  15   2   -8.67    8.08
  15  -5   2    2.49    8.81
  15  -6  -2  262.97   21.91
 -15   6  -2  308.14   21.18
   6  15  -2  287.08   24.03
  -6 -15  -2  283.64   14.71
  -6 -15  -2  264.66   21.15
  15  -6   2  311.37   24.38
 -15   6   2  312.55   25.31
   6  15   2  270.16   27.48
  -6 -15   2  266.40   21.04
 -15   7  -2   83.10   13.74
  -7 -15  -2   64.29    8.27
   7  15  -2   65.28   15.60
  -7 -15  -2   65.04   13.01
  15  -7  -2   61.13   14.71
 -15   7   2   92.60   17.58
  -7 -15   2   49.15   11.58
  15  -7   2   46.02   13.42
   7  15   2   57.65   14.57
  -8 -15  -2   51.36   13.02
  15  -8  -2   56.90   14.00
  -8 -15  -2   74.08    8.50
 -15   8  -2   60.62   12.62
   8  15  -2   77.16   16.33
   8  15   2   51.09   15.35
  -8 -15   2   46.93   12.90
 -15   8   2   42.91   13.33
  15  -8   2  103.27   17.97
  -9 -15  -2    8.22    9.47
   9  15  -2   -3.67    9.53
  15  -9  -2   11.47    9.54
 -15   9  -2    0.99    7.12
   9  15   2   -0.57    8.94
 -15   9   2   -0.45    9.30
  -9 -15   2  -10.31    7.10
  15  -9   2    5.68    9.55
 -15  10  -2  124.77   16.91
  10  15  -2  127.15   20.72
 -10 -15  -2  131.61   19.17
  15 -10  -2  111.89   18.27
  15 -10   2  120.56   19.90
  10  15   2  115.11   20.66
 -10 -15   2  125.72   18.51
 -15  10   2  156.30   22.77
 -11 -15  -2   -5.32    8.31
 -15  11  -2    9.79    8.38
  11  15  -2   -1.91    9.62
  15 -11  -2   -9.68    8.85
 -15  11   2   -0.29    9.70
  15 -11   2   -3.34    8.53
 -11 -15   2   -4.29    8.07
  11  15   2   -3.94    9.94
 -12 -15  -2   93.01   17.87
 -15  12  -2   89.68   15.84
  15 -12  -2   64.92   15.96
  12  15  -2   69.89   17.37
 -12 -15   2   88.84   16.66
  15 -12   2   76.03   17.64
  12  15   2   71.24   17.35
 -15  12   2   99.24   19.83
 -13 -15  -2   -8.40    7.13
 -15  13  -2   -7.52    6.99
  13  15  -2    0.61   10.71
  15 -13  -2   -0.34    9.21
  13  15   2   12.08   11.04
  15 -13   2    6.75   10.71
 -15  13   2   -0.35    9.45
 -13 -15   2   -4.00    8.24
  14  15  -2   89.50   19.69
  15 -14  -2   72.98   16.76
 -15  14  -2   72.10   15.02
 -14 -15  -2   82.02   16.98
  15 -14   2   68.01   16.29
  14  15   2   62.87   17.10
 -14 -15   2   58.13   14.63
 -15  14   2   65.92   17.02
  15 -15  -2   25.97   15.11
 -15  15  -2   19.50   10.63
 -15 -15  -2   -0.60    9.39
  15  15  -2   24.17   14.68
  15 -15   2   35.87   14.59
 -15 -15   2   23.33   11.84
  15  15   2   22.67   14.14
 -15  15   2   23.60   13.04
  16  15  -2   47.96   15.99
 -15  16  -2   93.24   16.94
  15 -16  -2  100.04   21.17
 -16 -15  -2   68.76   16.66
 -15  16   2   61.62   17.27
  16  15   2   43.52   16.03
  15 -16   2   59.86   16.05
 -16 -15   2   62.36   15.43
 -14  16  -2   82.83   16.26
  14 -16  -2  101.79   20.03
  16  14  -2   95.41   19.85
 -16 -14  -2  116.54   19.40
 -16 -14   2  122.95   19.89
  16  14   2   94.79   19.41
 -14  16   2  124.86   22.48
  14 -16   2  124.29   21.29
 -16 -13  -2   44.69   13.36
  13 -16  -2   70.39   16.25
 -13  16  -2   85.18   16.14
  16  13  -2   75.90   18.69
  13 -16   2   51.31   14.76
  16  13   2   97.59   20.02
 -13  16   2   68.11   16.61
 -16 -13   2   99.22   17.53
  12 -16  -2   15.54   12.61
 -12  16  -2   62.88   13.92
  16  12  -2   71.68   17.35
 -16 -12  -2   51.43   13.28
 -12  16   2   71.52   18.11
 -16 -12   2   51.15   14.15
  16  12   2   50.88   15.32
  12 -16   2   74.53   16.17
 -11  16  -2   91.15   16.31
  11 -16  -2   87.16   17.99
 -16 -11  -2   66.39   15.00
  16  11  -2   97.27   20.29
 -16 -11   2  100.31   16.67
 -11  16   2  119.00   20.46
  11 -16   2  145.03   20.00
  16  11   2  126.70   20.71
 -16 -10  -2    6.81    8.86
  10 -16  -2    3.00   10.24
  16  10  -2    5.96    9.38
 -10  16  -2   20.89   10.96
 -10  16   2   -2.59    9.65
  10 -16   2   18.48    9.93
 -16 -10   2    8.44    8.61
  16  10   2   17.02   10.81
 -16  -9  -2  102.00   17.53
  -9  16  -2   92.69   16.89
   9 -16  -2  100.56   17.13
  16   9  -2   91.27   17.61
 -16  -9  -2  112.53   17.21
  16   9   2   78.76   16.07
  -9  16   2   63.57   15.42
   9 -16   2   68.10   14.35
 -16  -9   2  100.11   15.97
  -8  16  -2    3.52    8.77
  16   8  -2   -7.77   10.33
 -16  -8  -2   -2.12    6.97
   8 -16  -2   -4.00    8.33
   8 -16  -2    6.49    5.54
   8 -16   2    1.29    8.92
  -8  16   2   14.07   10.68
 -16  -8   2    5.26    7.82
  16   8   2    4.39    9.43
   7 -16  -2  206.36   22.69
  16   7  -2  156.03   12.88
   7 -16  -2  174.23   13.99
  16   7  -2  146.10   20.36
 -16  -7  -2  189.03   16.89
  -7  16  -2  175.75   20.64
  -7  16   2  136.18   20.20
   7 -16   2  186.31   20.36
 -16  -7   2  136.94   16.94
   7 -16   2  172.95   19.45
  16   7   2  149.27   19.51
  16   6  -2  253.87   16.14
  16   6  -2  240.74   25.78
   6 -16  -2  227.49   16.04
   6 -16  -2  225.71   22.82
  -6  16  -2  203.37   22.84
 -16  -6   2  249.99   19.56
   6 -16   2  242.92   22.39
  -6  16   2  324.79   26.62
   6 -16   2  244.31   19.90
  16   6   2  242.89   24.09
  -5  16  -2   99.51   14.98
  16   5  -2  125.00   13.47
  -5  16  -2  117.21   17.35
   5 -16  -2  123.46   13.74
   5 -16  -2  148.65   18.06
  16   5  -2  107.81   19.21
   5 -16   2  134.57   17.15
  16   5   2  137.74   18.24
  -5  16   2   96.75   18.19
   5 -16   2  165.24   18.10
 -16  -5   2  156.04   16.56
  16   4  -2  343.90   20.01
   4 -16  -2  309.00   19.28
  16   4  -2  380.39   28.06
  -4  16  -2  326.97   21.34
  -4  16  -2  333.34   25.09
   4 -16  -2  346.26   22.31
  -4  16   2  270.82   27.91
   4 -16   2  367.68   21.79
   4 -16   2  316.28   21.63
 -16  -4   2  313.45   20.15
  16   4   2  355.95   24.50
  -3  16  -2  397.78   27.09
  16   3  -2  440.67   29.13
  -3  16  -2  421.36   22.80
  16   3  -2  414.08   22.26
   3 -16  -2  403.10   22.02
   3 -16  -2  433.70   24.27
 -16  -3   2  452.32   22.82
  16   3   2  396.32   23.73
   3 -16   2  441.51   25.77
   3 -16   2  398.62   22.18
  -3  16   2  416.24   29.73
  16   3   2  421.66   26.67
   2 -16  -2   18.37    8.75
  -2  16  -2   24.38    8.84
  -2  16  -2   45.14   12.36
  16   2  -2   36.75    9.70
  16   2  -2   36.52   12.49
   2 -16  -2   41.39    9.93
   2 -16   2   24.89    7.99
   2 -16   2   34.21    9.65
 -16  -2   2   20.43    7.63
  16   2   2   29.41    9.99
  16   2   2   46.82   12.06
  -2  16   2   19.75   11.33
  16   1  -2  130.38   19.80
   1 -16  -2  202.42   18.34
   1 -16  -2  195.97   18.02
  -1  16  -2  149.07   20.44
  -1  16  -2  168.80   14.25
  16   1  -2  148.76   16.51
  -1  16   2  142.79   20.52
  16   1   2  159.20   19.37
   1 -16   2  213.69   21.03
  16   1   2  185.63   19.96
   1 -16   2  191.91   13.95
 -16  -1   2  172.41   13.90
  16   0  -2   25.99    9.59
   0 -16  -2   22.80    8.85
  16   0  -2   16.06   11.00
   0  16  -2   48.47   12.95
   0 -16  -2   29.07    8.23
   0  16  -2   30.02    7.85
   0 -16   2   34.90   10.27
  16   0   2   34.51   10.91
   0  16   2   44.45   13.04
   0 -16   2   35.84    7.69
 -16   0   2   41.69    8.22
  16   0   2   28.31    9.60
   1  16  -2  218.30   24.13
  16  -1  -2  202.89   24.40
  16  -1  -2  209.48   20.95
   1  16  -2  198.29   13.69
  -1 -16  -2  235.87   16.10
  -1 -16  -2  162.33   17.42
   1  16   2  183.21   22.31
 -16   1   2  204.73   13.70
  16  -1   2  219.02   22.38
  -1 -16   2  157.12   18.26
  -1 -16   2  214.90   13.16
  16  -1   2  193.39   19.99
   2  16  -2  137.86   11.26
 -16   2  -2  146.65   18.09
  -2 -16  -2  153.43   17.49
  16  -2  -2  159.84   18.75
   2  16  -2  127.10   18.60
  -2 -16  -2  124.37   13.57
  -2 -16   2  145.70   10.32
 -16   2   2  143.39   11.24
 -16   2   2  153.64   21.65
   2  16   2  126.31   20.10
  -2 -16   2  158.26   18.60
  16  -2   2  146.40   18.50
  16  -3  -2  158.11   19.65
  -3 -16  -2  136.72   17.03
  -3 -16  -2  169.03   14.62
   3  16  -2  129.57   19.07
 -16   3  -2  141.06   17.27
 -16   3   2  128.66   19.11
  -3 -16   2  106.01   16.60
   3  16   2  155.61   22.50
 -16   3   2  127.96   10.64
  16  -3   2  124.70   18.35
  -3 -16   2  133.18    8.81
  -4 -16  -2  132.41   12.82
  -4 -16  -2  146.48   17.62
  16  -4  -2  115.96   18.37
 -16   4  -2  139.73   17.41
   4  16  -2   90.20   16.16
  16  -4   2  126.27   17.76
  -4 -16   2   86.85   15.66
   4  16   2  126.82   19.36
 -16   4   2   99.94   17.61
 -16   4   2  125.11    9.83
  16  -5  -2  193.82   21.92
   5  16  -2  187.07   23.12
 -16   5  -2  204.73   20.59
  -5 -16  -2  178.32   12.80
  -5 -16  -2  226.47   21.99
  -5 -16   2  210.15   22.43
  16  -5   2  210.06   23.74
   5  16   2  216.98   25.74
 -16   5   2  199.42   24.35
   6  16  -2   -5.02   10.18
  -6 -16  -2    8.15    5.28
 -16   6  -2   14.16    8.53
  16  -6  -2    5.83    9.16
  -6 -16  -2   12.18    9.52
  -6 -16   2    9.51    9.17
   6  16   2    3.57    9.96
  16  -6   2    6.67    9.82
 -16   6   2    4.76    9.20
  16  -7  -2   79.76   16.57
  -7 -16  -2  116.70   17.45
 -16   7  -2   89.46   15.05
   7  16  -2   82.97   16.11
  -7 -16  -2  115.47   12.10
   7  16   2   68.34   16.15
  -7 -16   2   99.31   16.97
  16  -7   2  111.14   18.75
 -16   7   2   73.88   15.83
  -8 -16  -2   57.58   13.54
 -16   8  -2   44.05   12.00
   8  16  -2   31.77   13.54
  16  -8  -2   43.01   13.26
  16  -8   2   51.82   14.06
 -16   8   2   21.57   12.65
   8  16   2   49.54   15.92
  -8 -16   2   59.96   13.36
  16  -9  -2   95.26   17.62
  -9 -16  -2  127.88   18.61
   9  16  -2   85.91   18.01
 -16   9  -2   92.41   15.44
  -9 -16   2  101.52   16.93
   9  16   2  101.81   19.54
 -16   9   2   81.07   18.33
  16  -9   2  114.59   18.29
 -16  10  -2   24.97   10.50
  16 -10  -2   49.83   14.40
  10  16  -2   29.19   12.62
 -10 -16  -2   18.41   10.60
 -16  10   2   29.15   13.79
  10  16   2   40.00   15.13
 -10 -16   2   49.43   12.84
  16 -10   2   54.24   15.73
  11  16  -2  127.28   20.19
 -11 -16  -2  118.50   18.18
 -16  11  -2  168.10   20.09
  16 -11  -2  108.29   19.94
 -16  11   2  132.20   22.30
  11  16   2  118.11   20.78
 -11 -16   2  138.63   20.73
  16 -11   2  138.22   21.12
  16 -12  -2   71.06   17.46
 -16  12  -2   69.69   14.69
  12  16  -2   59.32   15.67
 -12 -16  -2   55.58   15.34
  12  16   2   77.61   18.28
 -16  12   2   42.60   14.73
 -12 -16   2   62.89   15.53
  16 -12   2   64.28   16.41
 -16  13  -2  119.21   18.05
  13  16  -2  130.32   21.35
  16 -13  -2  129.52   22.31
 -13 -16  -2   86.70   17.40
 -16  13   2  130.32   21.74
 -13 -16   2  103.23   18.59
  13  16   2  140.11   24.11
  16 -13   2   98.20   19.82
 -14 -16  -2   14.34   10.74
 -16  14  -2    7.41    9.01
  14  16  -2   -2.06   11.63
  16 -14  -2   -3.58   11.03
 -16  14   2    3.77   11.73
  16 -14   2    3.26   10.90
  14  16   2   19.16   14.07
 -14 -16   2   -0.66    8.92
 -15 -16  -2  103.47   19.42
  16 -15  -2  112.14   21.21
  15  16  -2   65.73   19.45
 -16  15  -2   66.13   15.06
  16 -15   2   58.55   16.11
 -15 -16   2  117.57   19.73
  15  16   2   53.18   16.19
 -16  15   2   52.24   15.85
 -16  16  -2    3.18    9.37
 -16 -16  -2   -0.73   10.15
  16  16  -2   -9.17   10.71
  16 -16  -2    8.17   12.46
 -16 -16   2   18.92   11.66
  16  16   2   10.95   12.33
 -16  16   2    5.92   10.64
  16 -16   2   -3.25   10.90
  16 -17  -2   51.68   17.01
 -16  17  -2   53.15   15.31
 -17 -16  -2   53.43   16.55
  17  16  -2   79.22   21.44
  16 -17   2  106.07   22.26
 -16  17   2   71.47   19.94
  17  16   2   57.71   17.32
 -17 -16   2   53.99   15.11
  15 -17  -2    6.60   11.84
  17  15  -2  -11.72   10.74
 -17 -15  -2   -1.57   10.00
 -15  17  -2    6.49   10.20
  15 -17   2   -1.07    9.88
 -15  17   2  -13.44    9.51
  17  15   2   -2.17   11.04
 -17 -15   2  -12.31    7.40
  14 -17  -2   81.79   19.65
 -14  17  -2   86.09   17.54
  17  14  -2   59.24   17.82
 -17 -14  -2   88.02   18.62
  17  14   2   59.42   17.73
  14 -17   2   47.01   16.89
 -14  17   2   68.58   18.36
 -17 -14   2  112.04   19.83
 -17 -13  -2   27.85   13.00
  13 -17  -2   10.03   11.27
 -13  17  -2   47.54   14.24
  17  13  -2   17.00   13.23
  17  13   2   37.21   14.68
 -17 -13   2   20.34   11.57
  13 -17   2   34.73   13.94
 -13  17   2   33.40   15.51
 -12  17  -2   84.67   17.05
  12 -17  -2   90.96   18.41
 -17 -12  -2   95.59   17.34
  17  12  -2   92.03   19.22
 -12  17   2   88.19   19.15
 -17 -12   2   87.51   17.25
  17  12   2  112.66   20.52
  12 -17   2  135.20   21.00
 -11  17  -2   12.38   10.18
 -17 -11  -2    0.80    8.94
  11 -17  -2   -4.10   10.04
  17  11  -2   12.59   11.31
 -11  17   2    4.63   11.42
  11 -17   2    7.86    9.92
 -17 -11   2    4.69    8.82
  17  11   2    5.63   10.49
 -10  17  -2   96.22   17.22
  17  10  -2  108.58   22.05
  10 -17  -2   92.28   16.99
 -17 -10  -2   92.96   16.54
  17  10   2   80.98   17.06
  10 -17   2  103.49   17.49
 -17 -10   2  109.40   17.13
 -10  17   2   73.12   17.55
   9 -17  -2   -5.32    9.01
 -17  -9  -2    9.57    8.84
  -9  17  -2    6.43    8.93
  17   9  -2   -6.73   10.82
   9 -17   2    5.53    8.87
 -17  -9   2   12.14    9.69
  17   9   2    0.81    8.61
  -9  17   2   26.31   12.24
 -17  -8  -2   92.39   12.98
  -8  17  -2   82.89   16.21
   8 -17  -2   98.36   16.70
  17   8  -2  145.32   22.56
 -17  -8   2   77.83   14.59
   8 -17   2   94.42   15.50
   8 -17   2   99.58   16.30
  -8  17   2   61.56   16.46
  17   8   2   69.86   16.32
  17   7  -2  101.29   12.60
 -17  -7  -2  120.64   14.65
  -7  17  -2   69.10   15.64
   7 -17  -2  104.24   17.48
   7 -17  -2  116.44   13.10
  17   7  -2  126.01   20.94
   7 -17   2   95.10   15.68
  -7  17   2  119.87   20.76
 -17  -7   2  113.81   16.38
   7 -17   2  118.42   16.88
  17   7   2  151.61   20.85
   6 -17  -2  197.73   21.39
  -6  17  -2  206.83   21.21
  -6  17  -2  229.71   25.32
   6 -17  -2  207.02   16.13
  17   6  -2  227.82   16.14
  17   6  -2  172.82   23.56
   6 -17   2  216.84   21.72
  17   6   2  197.02   22.78
   6 -17   2  196.78   20.76
 -17  -6   2  191.56   19.46
  -6  17   2  181.36   23.40
  17   5  -2  204.68   25.62
   5 -17  -2  157.51   19.22
  -5  17  -2  166.35   20.92
   5 -17  -2  164.36   15.96
  17   5  -2  163.02   16.28
  -5  17  -2  177.61   18.66
 -17  -5   2  177.17   18.06
  -5  17   2  133.96   21.74
   5 -17   2  132.18   17.61
   5 -17   2  187.99   19.24
  17   5   2  158.71   20.89
  17   4  -2   79.81   16.63
  17   4  -2   85.57   12.29
  -4  17  -2   85.73   14.00
   4 -17  -2   83.41   14.02
   4 -17  -2   66.85   11.41
  -4  17  -2   89.98   17.50
  17   4   2   53.60   13.26
  -4  17   2   72.26   17.64
   4 -17   2   92.54   14.05
 -17  -4   2   82.34   12.68
   4 -17   2   79.23   14.00
  -3  17  -2   54.38   14.29
  -3  17  -2   53.92   11.50
  17   3  -2   60.35   11.41
   3 -17  -2   39.10    9.62
  17   3  -2   64.04   16.18
   3 -17  -2   63.79   12.74
  17   3   2   70.62   13.43
   3 -17   2   54.03   10.52
 -17  -3   2   65.54   11.33
  17   3   2   35.45   11.52
   3 -17   2   52.57   11.98
  -3  17   2   67.73   16.61
   2 -17  -2  231.95   17.97
  -2  17  -2  238.60   24.45
  17   2  -2  253.82   27.20
   2 -17  -2  232.44   18.22
  -2  17  -2  246.25   17.79
  17   2  -2  186.45   19.07
  17   2   2  233.20   22.25
  17   2   2  270.24   25.37
 -17  -2   2  240.38   16.83
   2 -17   2  220.88   16.42
   2 -17   2  237.33   22.43
  -2  17   2  257.16   28.01
  -1  17  -2    4.53    7.51
  17   1  -2   -1.71    9.43
   1 -17  -2    8.15    7.43
  17   1  -2   -7.74    6.89
   1 -17  -2    5.05    6.27
  -1  17  -2    9.68   10.99
 -17  -1   2    8.16    6.34
  -1  17   2    0.17    9.07
   1 -17   2   14.57    6.61
   1 -17   2   11.94    8.49
  17   1   2    3.29    8.63
  17   1   2    0.88    7.67
   0 -17  -2  185.84   18.70
   0  17  -2  158.01   13.50
   0  17  -2  115.19   18.00
  17   0  -2  177.87   24.07
  17   0  -2  121.96   16.98
   0 -17  -2  162.56   17.09
  17   0   2  171.68   19.96
 -17   0   2  168.16   13.48
   0  17   2  112.51   19.88
   0 -17   2  162.52   14.48
   0 -17   2  148.78   18.34
  17   0   2  149.70   19.46
  -1 -17  -2   96.38   12.96
 -17   1  -2   88.05   14.98
  17  -1  -2   96.12   15.52
   1  17  -2  109.65   12.00
  -1 -17  -2  103.25   14.81
   1  17  -2  119.24   19.27
 -17   1   2  130.45   12.64
  -1 -17   2  117.70   11.46
  -1 -17   2   91.31   15.13
  17  -1   2  162.43   20.02
   1  17   2  155.60   22.22
 -17   1   2  111.24   19.07
 -17   2  -2  179.09   19.83
  17  -2  -2  177.35   20.61
   2  17  -2  162.74   21.73
  -2 -17  -2  178.73   19.06
  -2 -17  -2  200.76   14.96
 -17   2   2  201.47   13.22
  17  -2   2  199.08   21.70
  -2 -17   2  190.41   11.99
 -17   2   2  161.89   21.45
  -2 -17   2  156.88   19.58
   2  17   2  183.50   23.86
  -3 -17  -2  166.38   13.74
   3  17  -2  179.26   23.32
  17  -3  -2  181.19   21.21
 -17   3  -2  212.19   22.08
  -3 -17  -2  195.72   20.35
  17  -3   2  205.69   23.62
 -17   3   2  174.72   12.20
 -17   3   2  172.72   22.98
  -3 -17   2  173.43   20.16
   3  17   2  232.74   27.97
   4  17  -2  108.12   18.82
  -4 -17  -2  113.94   12.29
  -4 -17  -2   84.00   14.37
  17  -4  -2   98.52   17.25
 -17   4  -2  113.60   16.27
  17  -4   2   94.38   17.19
  -4 -17   2  114.94   17.05
   4  17   2  120.23   20.79
 -17   4   2  133.16   16.12
 -17   4   2  134.48   21.36
  -5 -17  -2    2.71    7.02
  17  -5  -2   -1.84    9.25
 -17   5  -2    5.48    7.97
   5  17  -2   -2.41    8.88
  -5 -17  -2   -2.65    5.18
 -17   5   2   -1.99    8.37
  -5 -17   2   -2.96    7.73
   5  17   2   11.07   11.66
  17  -5   2    2.15    9.47
  17  -6  -2  228.93   23.96
  -6 -17  -2  241.88   23.68
 -17   6  -2  236.33   22.81
   6  17  -2  159.86   21.77
  17  -6   2  245.20   25.96
 -17   6   2  244.26   27.26
   6  17   2  210.99   27.19
  -6 -17   2  178.75   20.96
 -17   7  -2   24.94   10.71
   7  17  -2   14.11   12.45
  17  -7  -2   27.34   12.60
  -7 -17  -2   16.33    9.79
  17  -7   2   -5.78    8.71
  -7 -17   2   18.87   10.65
   7  17   2   19.48   13.00
 -17   7   2   22.72   12.24
 -17   8  -2  148.51   19.17
   8  17  -2  156.62   23.30
  -8 -17  -2  151.25   19.62
  17  -8  -2  138.86   20.97
  -8 -17   2  136.96   19.28
 -17   8   2  132.50   21.20
   8  17   2  149.59   23.99
  17  -8   2  186.37   23.60
  -9 -17  -2  104.22   17.73
 -17   9  -2  105.10   16.61
   9  17  -2   71.60   17.25
  17  -9  -2   56.57   16.38
   9  17   2  124.94   21.37
  17  -9   2   56.20   15.24
  -9 -17   2   58.35   15.41
 -17   9   2   57.76   15.97
  10  17  -2   89.74   18.14
 -17  10  -2   65.04   14.57
 -10 -17  -2   72.59   16.05
  17 -10  -2  121.89   21.38
 -10 -17   2  102.07   18.35
 -17  10   2  101.74   20.78
  17 -10   2  100.18   19.57
  10  17   2   90.55   19.55
 -11 -17  -2  162.50   21.94
  17 -11  -2  173.24   24.39
  11  17  -2  162.95   24.25
 -17  11  -2  173.80   20.74
  17 -11   2  200.82   24.98
  11  17   2  176.95   24.70
 -17  11   2  121.01   22.10
 -11 -17   2  155.14   21.58
  17 -12  -2   81.64   17.67
 -17  12  -2   85.53   16.50
 -12 -17  -2  129.27   20.32
  12  17  -2   79.51   18.97
  12  17   2   70.93   16.76
 -17  12   2  114.23   21.40
  17 -12   2  116.70   21.22
 -12 -17   2  122.84   19.43
 -13 -17  -2   -2.60    8.93
 -17  13  -2   13.46    9.68
  17 -13  -2  -13.68   10.03
  13  17  -2    4.22   12.82
 -17  13   2   -7.74    9.05
  17 -13   2    9.17   11.80
  13  17   2   -6.84   11.34
 -13 -17   2    7.53    9.95
  17 -14  -2  107.11   21.71
 -17  14  -2  116.16   19.06
  14  17  -2   64.45   18.59
 -14 -17  -2  106.58   18.91
 -17  14   2   88.53   20.27
 -14 -17   2   83.62   17.58
  14  17   2  106.50   21.95
  17 -14   2   84.55   19.25
  15  17  -2   38.87   14.86
  17 -15  -2  120.49   23.20
 -17  15  -2   51.25   14.29
 -15 -17  -2   87.00   17.53
  15  17   2   67.98   18.86
  17 -15   2   43.61   14.83
 -17  15   2   55.94   16.85
 -15 -17   2   52.86   16.02
 -17  16  -2  172.85   23.91
 -16 -17  -2  158.53   24.04
  17 -16  -2  112.15   22.38
  16  17  -2  156.66   27.77
 -17  16   2  144.01   25.00
  17 -16   2  218.06   29.55
  16  17   2  151.75   24.91
 -16 -17   2  161.38   24.13
  17  17  -2    4.12   13.18
 -17 -17  -2   -5.73   10.35
 -17  17  -2    4.39    9.91
  17 -17  -2   -0.80   10.09
  17  17   2   -6.60   11.32
 -17  17   2   11.21   12.80
 -17 -17   2  -11.50    9.04
  17 -17   2   12.68   13.30
  18  17  -2   82.32   22.25
 -18 -17  -2   81.94   18.59
 -17  18  -2   86.21   18.09
  17 -18  -2   60.34   20.75
 -17  18   2  119.31   24.25
  18  17   2   78.35   21.90
 -18 -17   2   72.75   18.71
  17 -18   2   59.94   18.57
  16 -18  -2   41.66   16.00
 -16  18  -2   21.39   11.99
  18  16  -2   23.65   14.92
 -18 -16  -2   11.83   13.00
  16 -18   2   15.23   13.65
 -18 -16   2   22.22   12.50
 -16  18   2   11.74   13.31
  18  16   2   10.22   12.40
 -18 -15  -2   57.80   16.11
  15 -18  -2  104.28   20.61
  18  15  -2   70.02   19.02
 -15  18  -2   58.44   16.30
 -15  18   2   55.43   17.67
 -18 -15   2   85.77   18.46
  15 -18   2   51.99   15.94
  18  15   2   45.19   16.50
  18  14  -2  -15.63   10.27
 -18 -14  -2    4.20   10.00
  14 -18  -2   -1.84   11.46
 -14  18  -2    4.44    9.60
  18  14   2    3.60   10.80
  14 -18   2    8.88   12.81
 -14  18   2    5.87   10.87
 -18 -14   2   -1.60    8.89
 -18 -13  -2   44.41   14.72
  18  13  -2   29.72   15.33
  13 -18  -2   58.28   16.69
 -13  18  -2   56.65   15.60
 -13  18   2   68.44   18.30
  18  13   2   53.42   17.17
 -18 -13   2   59.14   15.82
  13 -18   2   39.36   14.39
 -18 -12  -2   -4.12    8.37
 -12  18  -2    1.46    9.61
  18  12  -2    8.64   13.57
  12 -18  -2   -9.81    9.21
  12 -18   2    3.36    9.49
  18  12   2    2.90   10.21
 -12  18   2    8.51   12.20
 -18 -12   2   -1.14    7.73
 -11  18  -2  104.57   19.16
  11 -18  -2  109.73   18.52
  18  11  -2   99.42   20.97
 -18 -11  -2  122.80   19.73
  11 -18   2  135.51   20.73
 -18 -11   2  115.31   18.37
 -11  18   2   69.94   17.45
  18  11   2  105.27   19.96
 -18 -10  -2   45.73   14.33
 -10  18  -2   46.28   13.65
  10 -18  -2   79.10   17.71
  18  10  -2   29.02   13.88
 -10  18   2   57.29   16.16
  10 -18   2   64.69   15.02
 -18 -10   2   48.56   12.99
  18  10   2   39.18   14.37
  -9  18  -2   64.80   14.85
  18   9  -2   57.65   16.74
   9 -18  -2   65.16   15.58
 -18  -9  -2   82.70   16.07
  -9  18   2   80.15   18.44
 -18  -9   2   53.16   12.87
   9 -18   2   66.46   14.11
  18   9   2   81.06   17.59
  18   8  -2   33.38   14.17
   8 -18  -2   52.91   13.83
 -18  -8  -2   56.55   13.22
  -8  18  -2   49.13   14.35
 -18  -8  -2   62.45   12.00
  -8  18   2   81.08   18.90
   8 -18   2   43.69   12.49
   8 -18   2   39.10   12.45
 -18  -8   2   58.16   13.34
  18   8   2   49.15   13.88
  18   7  -2  168.19   24.56
  -7  18  -2  188.74   23.03
   7 -18  -2  182.68   21.72
  -7  18  -2  138.77   18.86
   7 -18  -2  169.84   16.80
 -18  -7  -2  161.66   17.40
   7 -18   2  185.47   20.91
   7 -18   2  145.68   18.41
  -7  18   2   99.76   20.08
 -18  -7   2  156.34   19.16
  18   7   2  184.16   23.12
   6 -18  -2   37.59   11.85
  18   6  -2   31.79    8.95
  -6  18  -2   -1.06    8.73
   6 -18  -2   35.62    9.24
  -6  18  -2   38.62   11.92
  18   6  -2    0.72    9.31
   6 -18   2   24.87   10.06
   6 -18   2   20.82   10.07
  -6  18   2   17.23   11.68
 -18  -6   2   22.31    9.03
  18   6   2   38.30   13.00
  -5  18  -2  236.23   22.29
   5 -18  -2  251.71   18.20
  18   5  -2  270.10   18.38
  18   5  -2  270.62   28.68
   5 -18  -2  253.62   21.02
  -5  18  -2  266.64   27.22
 -18  -5   2  220.31   18.28
  18   5   2  242.65   26.62
   5 -18   2  241.09   21.99
   5 -18   2  249.84   24.61
  -5  18   2  255.30   28.79
   4 -18  -2    1.08    5.91
  -4  18  -2   -1.83    8.78
  -4  18  -2   14.08   10.62
  18   4  -2   -1.37   10.34
  18   4  -2    3.96    6.20
   4 -18  -2    9.22    8.55
  -4  18   2   14.55   11.67
 -18  -4   2   -1.54    6.62
   4 -18   2   -4.19    6.84
   4 -18   2    4.38    6.81
  18   4   2   19.83   10.46
  -3  18  -2   82.05   13.47
   3 -18  -2   75.75   13.16
  18   3  -2   63.11   12.50
  -3  18  -2   85.53   16.79
   3 -18  -2   79.95   14.03
  18   3  -2   73.20   17.62
   3 -18   2   69.00   11.99
   3 -18   2   63.64   13.46
  -3  18   2   87.87   18.89
 -18  -3   2   90.33   13.01
  18   3   2   79.44   15.72
  18   3   2   91.33   15.47
   2 -18  -2   20.83    8.30
  -2  18  -2   15.78    8.67
  18   2  -2   24.53   12.63
  18   2  -2   28.35    9.22
  -2  18  -2   12.31   11.03
   2 -18  -2   25.84    8.24
 -18  -2   2   16.79    7.47
  -2  18   2   12.97   11.46
  18   2   2    5.38    8.24
  18   2   2    2.68    8.18
   2 -18   2   21.56    8.26
   2 -18   2    8.10    8.08
  18   1  -2   19.24    9.15
  -1  18  -2   25.36   12.98
   1 -18  -2    4.08    7.88
   1 -18  -2   24.11    9.11
  -1  18  -2   16.05    8.24
  18   1  -2   11.47   10.35
 -18  -1   2   22.54    7.57
  18   1   2    5.36    9.28
   1 -18   2   34.86    8.67
   1 -18   2   25.50   10.37
  -1  18   2   24.86   12.81
  18   1   2   19.03   10.45
  18   0  -2   13.93    9.74
   0  18  -2   19.53   11.76
  18   0  -2   -0.21    9.82
   0 -18  -2    0.99    6.97
   0 -18  -2    3.80    6.96
   0  18  -2   -0.45    6.77
   0  18   2   31.47   13.45
   0 -18   2    1.04    5.67
  18   0   2    7.18    8.88
  18   0   2    6.66    9.03
   0 -18   2   12.63    8.61
 -18   0   2   12.36    6.28
  -1 -18  -2  231.68   21.59
  -1 -18  -2  181.03   17.26
  18  -1  -2  177.91   20.46
   1  18  -2  169.10   21.72
 -18   1  -2  190.62   21.93
  18  -1   2  202.23   22.57
 -18   1   2  240.96   28.79
  -1 -18   2  189.00   20.97
 -18   1   2  229.30   15.00
  -1 -18   2  225.12   14.10
   1  18   2  132.53   20.51
  18  -2  -2   45.77   12.90
  -2 -18  -2   77.92   11.69
   2  18  -2   61.65   15.28
 -18   2  -2   64.46   13.41
  -2 -18  -2   46.04   12.29
 -18   2   2   56.96   15.49
   2  18   2   94.71   18.69
  18  -2   2   70.32   15.15
 -18   2   2   84.05   10.46
  -2 -18   2   86.72   15.59
  18  -3  -2  200.56   22.93
 -18   3  -2  144.17   19.03
  -3 -18  -2  139.59   17.96
   3  18  -2  196.28   25.10
  -3 -18  -2  170.53   14.21
  -3 -18   2  146.64   19.70
   3  18   2  185.54   25.48
  18  -3   2  173.53   22.05
 -18   3   2  168.07   23.84
 -18   3   2  201.35   20.43
   4  18  -2   18.09   12.01
  18  -4  -2    0.36    9.65
  -4 -18  -2   10.83    6.25
 -18   4  -2    3.41    7.26
  -4 -18  -2   13.74    8.61
   4  18   2    6.78    9.95
 -18   4   2   -1.51    9.35
  18  -4   2  -12.43    7.66
  -4 -18   2    6.53    8.71
  18  -5  -2   54.85   14.50
   5  18  -2   38.49   13.20
 -18   5  -2   45.56   12.24
  -5 -18  -2   61.46   14.55
  18  -5   2   80.31   17.11
 -18   5   2   67.83   16.43
  -5 -18   2   84.79   16.99
   5  18   2   62.97   16.23
 -18   6  -2   10.94    8.63
   6  18  -2    6.53   10.34
  18  -6  -2   10.38    9.54
  -6 -18  -2   13.12    9.05
 -18   6   2    2.55    9.50
  -6 -18   2    6.64    9.49
  18  -6   2    3.55    9.95
   6  18   2   -6.93   10.95
  -7 -18  -2  171.88   21.36
  18  -7  -2  138.28   20.44
 -18   7  -2  168.36   20.73
   7  18  -2  115.36   20.32
 -18   7   2  143.45   22.61
   7  18   2  147.66   23.80
  18  -7   2  205.39   24.56
  -7 -18   2  195.02   23.21
   8  18  -2   49.45   15.33
 -18   8  -2   30.52   11.69
  -8 -18  -2   26.92   11.76
  18  -8  -2   16.94   12.81
 -18   8   2   17.68   11.55
  -8 -18   2   32.16   11.87
  18  -8   2   29.33   13.51
   8  18   2   23.73   13.01
  18  -9  -2  149.58   22.01
   9  18  -2  178.97   24.79
 -18   9  -2  151.86   19.90
  -9 -18  -2  165.97   21.85
 -18   9   2  173.95   25.69
  18  -9   2  195.19   25.99
   9  18   2  138.92   22.83
  -9 -18   2  196.26   24.47
 -18  10  -2   89.09   15.90
  18 -10  -2   86.89   17.76
 -10 -18  -2  136.71   21.02
  10  18  -2  113.68   21.68
  10  18   2  127.76   23.13
 -10 -18   2   99.69   18.88
  18 -10   2   64.98   17.29
 -18  10   2   95.94   20.34
  11  18  -2   57.33   16.65
 -18  11  -2   71.83   14.97
 -11 -18  -2   55.26   15.40
  18 -11  -2   78.16   18.68
  11  18   2   27.86   13.51
  18 -11   2   88.89   17.75
 -11 -18   2   64.10   15.65
 -18  11   2   49.23   17.05
  18 -12  -2  122.24   21.71
  12  18  -2   85.57   20.01
 -12 -18  -2   82.40   17.55
 -18  12  -2   79.30   15.98
  18 -12   2   87.73   19.19
 -18  12   2   86.77   19.58
 -12 -18   2   96.46   18.12
  12  18   2   56.65   18.26
 -18  13  -2  100.34   17.76
 -13 -18  -2   93.19   18.76
  13  18  -2  124.77   23.54
  18 -13  -2   98.74   19.60
 -18  13   2  106.86   21.45
 -13 -18   2  109.51   20.02
  13  18   2   96.99   20.60
  18 -13   2  101.32   21.34
 -14 -18  -2   31.24   12.79
  18 -14  -2   41.57   16.21
 -18  14  -2   62.23   15.57
  14  18  -2   38.41   16.78
 -14 -18   2   37.67   14.24
  14  18   2   58.04   18.69
  18 -14   2   60.09   18.78
 -18  14   2   51.62   17.26
  18 -15  -2   84.60   19.89
  15  18  -2   93.81   22.87
 -15 -18  -2   70.00   17.63
 -18  15  -2   71.27   16.11
 -18  15   2  102.56   21.76
  15  18   2   80.20   19.85
  18 -15   2   79.11   18.42
 -15 -18   2   85.42   19.15
 -18  16  -2    9.83   10.99
  16  18  -2   25.39   15.04
  18 -16  -2   17.52   15.63
 -16 -18  -2   33.67   13.59
 -18  16   2   35.07   15.95
 -16 -18   2   19.35   12.91
  16  18   2   25.47   14.11
  18 -16   2    5.94   13.12
 -18  17  -2   41.98   14.45
  18 -17  -2   40.53   17.44
  17  18  -2   54.50   18.66
 -17 -18  -2   67.95   18.01
 -17 -18   2   54.43   16.87
  17  18   2   73.14   20.07
 -18  17   2   36.52   16.84
  18 -17   2   64.53   18.35
 -16  19  -2   68.63   18.30
  16 -19  -2   76.99   20.82
  19  16  -2   92.09   22.82
 -19 -16  -2   70.66   18.86
  16 -19   2   98.93   21.54
  19  16   2   50.73   17.95
 -19 -16   2   73.88   18.33
 -16  19   2   97.10   22.51
  15 -19  -2   -0.03   11.67
 -19 -15  -2   12.45   12.25
  19  15  -2    5.17   14.02
 -15  19  -2    7.61   10.96
  19  15   2   13.98   12.68
  15 -19   2  -18.78    9.07
 -19 -15   2   -3.54    9.50
 -15  19   2    4.93   11.70
  19  14  -2   55.12   18.61
 -14  19  -2   51.06   15.50
 -19 -14  -2   77.87   18.74
  14 -19  -2  101.23   20.59
  19  14   2   60.38   18.47
  14 -19   2   47.78   16.00
 -19 -14   2   62.60   16.25
 -14  19   2   83.12   20.97
  13 -19  -2   25.34   14.72
 -19 -13  -2   11.32   11.27
 -13  19  -2   -4.18    9.07
  19  13  -2    6.85   10.88
 -13  19   2   32.44   14.64
 -19 -13   2   10.46   10.78
  19  13   2   12.39   11.13
  13 -19   2    8.18   11.79
 -12  19  -2   26.41   13.38
 -19 -12  -2   29.02   12.79
  19  12  -2   51.52   17.76
  12 -19  -2   46.25   15.08
  12 -19   2   61.05   16.27
 -19 -12   2   73.77   16.78
  19  12   2   55.31   16.64
 -12  19   2   87.93   19.81
 -11  19  -2   58.73   15.38
 -19 -11  -2   34.95   12.87
  19  11  -2   58.74   17.98
  11 -19  -2   46.70   15.15
  11 -19   2   35.12   13.44
 -11  19   2   42.60   15.88
 -19 -11   2   57.59   14.30
  19  11   2   31.97   14.34
 -10  19  -2   59.88   16.01
 -19 -10  -2   63.61   15.39
  19  10  -2   46.33   16.81
  10 -19  -2   70.54   15.83
 -19 -10   2   91.63   16.86
  19  10   2   85.59   18.90
  10 -19   2   74.06   16.13
 -10  19   2   83.12   19.84
   9 -19  -2  195.50   24.39
 -19  -9  -2  181.25   22.91
  19   9  -2  132.44   22.14
  -9  19  -2  186.77   24.34
   9 -19   2  203.99   23.92
  19   9   2  163.85   24.29
 -19  -9   2  182.13   21.72
  -9  19   2  143.02   23.10
  -8  19  -2  168.24   21.54
 -19  -8  -2  185.24   21.91
  19   8  -2  190.75   25.66
  -8  19  -2  218.33   26.37
   8 -19  -2  159.20   21.20
  19   8   2  196.41   24.82
  -8  19   2  168.26   25.56
   8 -19   2  236.52   24.11
 -19  -8   2  170.05   20.48
   8 -19   2  180.98   21.86
  19   7  -2   11.81   12.32
   7 -19  -2   34.31   11.82
 -19  -7  -2    8.21    8.42
  -7  19  -2   17.84   10.95
  -7  19  -2    5.60    9.92
 -19  -7   2   12.04    9.19
  19   7   2   -1.92    8.75
  -7  19   2    6.83   10.44
   7 -19   2    2.75    8.97
   7 -19   2    2.38    8.69
  -6  19  -2   68.66   14.90
   6 -19  -2   66.36   11.46
  -6  19  -2   49.01   15.07
  19   6  -2   81.23   12.54
   6 -19  -2   64.11   14.71
  19   6  -2   75.90   17.74
  -6  19   2   73.05   18.22
 -19  -6   2   69.53   13.39
   6 -19   2   85.28   15.79
  19   6   2   74.21   16.69
   6 -19   2   64.38   13.71
  19   5  -2   33.62    9.67
  -5  19  -2    9.41   10.30
  19   5  -2   17.14   12.11
  -5  19  -2   26.12   12.68
   5 -19  -2   22.75    7.87
   5 -19  -2   14.73   10.04
   5 -19   2   10.72    9.44
  19   5   2   20.33   11.08
  -5  19   2   27.42   12.37
 -19  -5   2    6.87    6.88
   5 -19   2   17.92    9.55
  19   4  -2  102.72   20.11
  -4  19  -2   67.51   17.12
   4 -19  -2   93.68   15.43
  19   4  -2  106.62   14.76
   4 -19  -2   93.74   13.86
  -4  19  -2   99.19   15.74
  19   4   2   86.10   17.07
  -4  19   2   97.44   20.31
   4 -19   2  105.91   15.28
   4 -19   2   80.31   14.96
 -19  -4   2   57.14   11.74
  -3  19  -2   50.57   14.66
  19   3  -2   61.05   12.49
   3 -19  -2   72.54   13.59
  -3  19  -2   77.89   13.75
  19   3  -2   52.36   15.70
   3 -19  -2   73.95   12.86
 -19  -3   2   63.06   11.82
   3 -19   2   66.18   14.19
   3 -19   2   42.76   10.79
  -3  19   2   48.94   16.28
  19   3   2   80.02   16.62
  19   2  -2  247.51   29.11
   2 -19  -2  185.82   19.45
   2 -19  -2  187.39   19.96
  19   2  -2  180.28   19.62
  -2  19  -2  158.48   23.11
  -2  19  -2  168.45   17.53
  19   2   2  212.38   24.56
   2 -19   2  151.58   19.96
   2 -19   2  176.67   17.87
 -19  -2   2  189.33   18.60
  19   2   2  175.69   20.93
  -2  19   2  195.89   26.88
   1 -19  -2   22.03    9.34
   1 -19  -2   -0.68    6.76
  -1  19  -2  -22.43    9.08
  19   1  -2    8.22   10.87
  19   1  -2   21.22    9.55
  -1  19   2    6.29   11.32
  19   1   2    8.26    9.87
  19   1   2   21.04   10.41
   1 -19   2    9.97    8.87
 -19  -1   2   17.98    7.97
   1 -19   2   11.48    7.17
   0 -19  -2   98.88   13.97
  19   0  -2   70.39   14.35
   0  19  -2  114.06   19.74
  19   0  -2   65.20   15.87
   0 -19  -2   66.95   13.62
   0 -19   2   65.19   14.32
  19   0   2   90.34   16.50
  19   0   2  102.51   17.46
   0 -19   2   81.99   15.82
 -19   0   2   57.48   10.46
   0  19   2   45.49   16.50
  -1 -19  -2   15.65    8.73
 -19   1  -2    1.40    8.08
  19  -1  -2   10.63   10.38
   1  19  -2   -5.74    9.54
  -1 -19  -2    7.83    7.30
 -19   1   2    0.65    8.88
  -1 -19   2    4.06    7.74
  19  -1   2   10.13    8.93
 -19   1   2    6.94    5.92
   1  19   2   -2.33    9.85
  -2 -19  -2  156.12   19.30
   2  19  -2  168.34   24.80
  19  -2  -2  148.01   19.64
 -19   2  -2  194.47   22.46
  -2 -19  -2  186.51   17.09
 -19   2   2  136.76   21.85
   2  19   2  167.99   24.01
  19  -2   2  192.84   23.32
  -2 -19   2  145.22   20.99
 -19   3  -2    1.36    7.40
  19  -3  -2    0.14    9.36
  -3 -19  -2    9.59    6.40
  -3 -19  -2    2.21    7.70
   3  19  -2   14.51   13.07
   3  19   2    1.14   10.33
  19  -3   2   10.49   10.44
 -19   3   2   -2.89    8.64
  -3 -19   2    9.70    9.32
   4  19  -2  175.13   24.86
  19  -4  -2  139.28   20.35
 -19   4  -2  132.36   18.69
  -4 -19  -2  143.25   19.45
  -4 -19   2  142.47   21.02
  19  -4   2  124.03   19.87
 -19   4   2  150.35   23.68
   4  19   2  137.90   23.88
  19  -5  -2    9.71   10.12
 -19   5  -2   21.06   10.04
  -5 -19  -2  -12.56    6.71
   5  19  -2   -2.68   11.03
  19  -5   2    1.78   10.01
   5  19   2   10.78   10.93
 -19   5   2    5.77   10.57
  -5 -19   2   -4.85    7.67
  -6 -19  -2   97.26   16.94
 -19   6  -2   94.09   16.24
  19  -6  -2   69.54   16.92
   6  19  -2  106.93   20.50
   6  19   2  101.07   20.87
 -19   6   2   93.14   18.97
  19  -6   2   68.07   17.23
  -6 -19   2   86.66   17.46
 -19   7  -2  112.99   17.82
  19  -7  -2  108.37   19.44
   7  19  -2  111.12   21.32
  -7 -19  -2  122.99   20.14
  -7 -19   2   90.16   17.72
  19  -7   2  119.89   19.45
 -19   7   2  106.17   20.13
   7  19   2   66.73   16.77
   8  19  -2  125.57   21.57
 -19   8  -2  122.68   18.36
  -8 -19  -2  101.79   18.68
  19  -8  -2  131.22   22.20
  19  -8   2  109.16   20.89
   8  19   2  120.40   23.04
 -19   8   2  144.40   23.19
  -8 -19   2   99.50   18.44
 -19   9  -2   45.08   13.35
  -9 -19  -2   28.66   12.71
  19  -9  -2   31.98   15.04
   9  19  -2   48.52   15.35
  19  -9   2   55.21   16.62
   9  19   2   60.72   16.09
 -19   9   2   43.25   16.04
  -9 -19   2   32.67   13.22
 -19  10  -2   38.58   12.68
  10  19  -2   49.87   17.19
 -10 -19  -2   55.10   14.92
  19 -10  -2   90.60   20.88
  19 -10   2   86.32   19.55
 -10 -19   2   73.84   16.64
  10  19   2   47.69   17.44
 -19  10   2   70.94   18.67
 -19  11  -2    1.44    9.11
 -11 -19  -2   -5.48    8.93
  11  19  -2   -6.02   11.53
  19 -11  -2   -3.46   11.94
 -11 -19   2   -2.75    8.40
  11  19   2    9.04   12.61
 -19  11   2    1.69   12.03
  19 -11   2  -13.22    8.15
 -19  12  -2   93.98   17.73
 -12 -19  -2   71.44   17.20
  12  19  -2   80.25   19.45
  19 -12  -2   68.84   18.73
 -19  12   2   60.55   18.31
  19 -12   2   82.02   20.11
  12  19   2   43.55   15.76
 -12 -19   2   65.78   17.35
 -13 -19  -2    8.39   10.98
  13  19  -2  -11.25   10.25
 -19  13  -2    0.75    8.98
  19 -13  -2   -7.44   11.99
  19 -13   2   -9.96   10.96
  13  19   2   -5.00   12.70
 -13 -19   2   -2.04   10.67
 -19  13   2    6.62   12.72
 -19  14  -2   58.35   14.97
  14  19  -2   51.31   18.72
  19 -14  -2   82.68   20.36
 -14 -19  -2   66.23   17.50
 -14 -19   2  100.36   20.41
  14  19   2   37.75   16.12
  19 -14   2   41.23   16.61
 -19  14   2   58.06   17.87
  15  19  -2   18.22   15.06
 -15 -19  -2    7.29   12.00
  19 -15  -2   24.69   15.33
 -19  15  -2   10.84   11.24
  15  19   2   21.28   15.71
  19 -15   2   20.84   15.03
 -15 -19   2    6.81   11.69
 -19  15   2   25.48   14.72
  16  19  -2   59.02   19.97
 -19  16  -2   38.76   15.00
  19 -16  -2   69.62   20.54
 -16 -19  -2   40.60   15.88
 -19  16   2   39.64   16.37
  19 -16   2   33.66   16.34
  16  19   2   22.94   15.11
 -16 -19   2   53.61   16.09
 -14  20  -2   10.10   12.34
 -20 -14  -2   -6.88   10.11
  14 -20  -2   -0.77   11.79
  20  14  -2   -4.04   11.04
  14 -20   2  -10.14    9.99
 -14  20   2   -5.44   10.50
  20  14   2   20.23   14.30
 -20 -14   2   -3.27    9.10
  20  13  -2   36.27   18.74
 -13  20  -2   21.09   13.21
  13 -20  -2   47.63   17.21
 -20 -13  -2   56.18   16.00
  13 -20   2   70.37   17.11
 -20 -13   2   62.35   15.94
 -13  20   2   43.01   16.42
  20  13   2   47.73   16.49
  12 -20  -2    7.55   12.77
 -12  20  -2  -12.07    9.49
 -20 -12  -2    5.65   10.55
  20  12  -2    7.46   13.75
 -12  20   2    6.86   12.02
  20  12   2  -23.15    8.52
 -20 -12   2    0.34    9.11
  12 -20   2   10.70   11.66
  11 -20  -2   59.04   15.87
 -11  20  -2   42.91   14.91
 -20 -11  -2   72.86   17.18
  20  11  -2   26.99   15.33
  20  11   2   32.59   13.38
 -20 -11   2   32.68   12.55
 -11  20   2   41.34   15.26
  11 -20   2   12.81   11.36
  10 -20  -2   84.78   18.33
 -10  20  -2   79.10   17.86
 -20 -10  -2   86.42   17.68
 -10  20  -2   86.49   19.04
  20  10  -2   75.48   20.10
 -20 -10   2   97.82   16.92
  10 -20   2   60.87   16.57
 -10  20   2   84.32   20.97
  20  10   2   87.73   18.85
  -9  20  -2  126.57   20.28
  -9  20  -2  138.28   21.53
 -20  -9  -2  156.35   22.51
   9 -20  -2  141.20   21.01
  20   9  -2  125.72   22.73
  -9  20   2  135.40   25.47
  20   9   2  111.28   20.33
 -20  -9   2  166.49   21.39
   9 -20   2  144.29   21.33
 -20  -8  -2   18.14   10.19
  -8  20  -2   47.33   13.83
  -8  20  -2   33.78   13.64
  20   8  -2   24.61   14.13
   8 -20  -2   43.11   14.22
  20   8   2   23.33   12.78
   8 -20   2   12.10   11.09
 -20  -8   2   34.70   12.12
   8 -20   2   20.21   10.50
  -8  20   2   22.81   14.42
  -7  20  -2   75.78   15.61
   7 -20  -2   54.04   14.46
 -20  -7  -2   75.81   14.05
  -7  20  -2   68.69   16.66
  20   7  -2   53.14   16.96
 -20  -7  -2   64.85   14.83
   7 -20   2   43.32   13.39
  -7  20   2   53.76   16.93
 -20  -7   2   42.75   12.05
  20   7   2   34.23   14.58
   7 -20   2   67.07   15.04
 -20  -6  -2  163.44   19.44
  -6  20  -2  167.46   20.98
   6 -20  -2  174.81   21.56
  20   6  -2  170.33   25.72
  -6  20  -2  138.94   21.51
   6 -20  -2  120.72   16.69
 -20  -6   2  163.53   19.57
  20   6   2  182.17   24.41
   6 -20   2  194.37   22.51
   6 -20   2  169.74   20.99
  -6  20   2  140.46   23.33
  20   5  -2   86.81   19.39
   5 -20  -2   87.99   14.46
  -5  20  -2   83.15   15.26
  20   5  -2   63.55   12.55
  -5  20  -2   42.20   14.66
   5 -20  -2   90.83   16.59
   5 -20   2   55.45   13.48
  -5  20   2   60.99   17.15
   5 -20   2   66.40   14.96
  20   5   2   63.45   15.90
 -20  -5   2   89.81   14.02
  20   4  -2   15.73    8.90
  -4  20  -2   27.52   13.51
  20   4  -2   20.60   13.12
   4 -20  -2   53.94   12.97
  -4  20  -2   13.46    9.71
   4 -20  -2   34.68    9.81
   4 -20   2   25.42   10.11
  -4  20   2   30.09   12.94
 -20  -4   2   34.10   10.02
   4 -20   2   35.21   11.59
  20   4   2   13.83   10.96
  20   3  -2  161.31   24.37
   3 -20  -2  209.19   21.58
  -3  20  -2  219.72   27.41
   3 -20  -2  237.19   22.48
  -3  20  -2  170.45   18.93
  20   3  -2  194.68   20.63
  -3  20   2  186.31   26.62
   3 -20   2  196.30   22.61
   3 -20   2  161.54   18.23
 -20  -3   2  229.62   18.46
  20   3   2  200.53   25.23
   2 -20  -2  224.04   22.20
  -2  20  -2  238.28   28.66
   2 -20  -2  274.77   25.46
  20   2  -2  181.94   21.12
  20   2  -2  226.12   29.46
  20   2   2  203.48   24.38
   2 -20   2  225.12   17.81
 -20  -2   2  212.19   19.77
  -2  20   2  208.59   28.30
  20   2   2  196.83   22.68
   2 -20   2  192.64   23.21
  20   1  -2   93.03   20.00
   1 -20  -2   88.13   15.10
  -1  20  -2  112.78   20.17
   1 -20  -2   65.33   12.57
  20   1  -2  124.92   18.50
  20   1   2   62.28   14.69
   1 -20   2   73.29   15.13
  20   1   2   84.06   16.85
 -20  -1   2   86.03   12.55
  -1  20   2  118.33   22.70
 -20   0  -2   32.47   12.66
   0  20  -2   71.95   17.44
  20   0  -2   56.97   13.18
   0 -20  -2   38.05   11.30
   0 -20  -2   68.68   12.62
  20   0   2   48.75   13.93
 -20   0   2   44.22   15.22
   0  20   2   39.99   15.38
 -20   0   2   47.74   10.20
   0 -20   2   35.53   12.73
  -1 -20  -2  134.08   18.91
   1  20  -2   71.90   17.05
  -1 -20  -2  109.59   14.76
 -20   1  -2   99.95   17.65
  20  -1  -2   71.02   15.37
  20  -1   2   94.46   17.77
   1  20   2   70.99   17.57
 -20   1   2  111.71   20.66
  -1 -20   2  112.39   18.26
  20  -2  -2   68.28   15.73
 -20   2  -2   90.07   16.14
  -2 -20  -2   79.98   15.21
   2  20  -2   66.83   17.94
  -2 -20   2   80.69   16.69
  20  -2   2   84.16   18.21
 -20   2   2   44.11   15.04
   2  20   2  123.40   23.13
  -3 -20  -2  238.50   24.69
  20  -3  -2  321.45   30.46
 -20   3  -2  273.43   26.93
   3  20  -2  305.30   32.58
   3  20   2  254.92   31.13
 -20   3   2  261.14   30.17
  -3 -20   2  281.75   28.46
  20  -3   2  273.35   28.95
  20  -4  -2   -4.04    9.84
   4  20  -2    5.54   11.85
  -4 -20  -2   14.77    9.79
 -20   4  -2   10.20    9.24
   4  20   2    1.14   11.33
  20  -4   2    2.23    9.00
 -20   4   2    8.98   10.99
  -4 -20   2    8.86   10.07
  20  -5  -2   58.56   15.66
   5  20  -2   64.11   16.54
  -5 -20  -2   80.83   16.36
 -20   5  -2   62.90   14.32
  20  -5   2   86.40   17.81
  -5 -20   2  108.00   18.95
   5  20   2  101.86   22.50
 -20   5   2   38.80   14.85
  -6 -20  -2  112.05   18.75
   6  20  -2   83.75   19.45
 -20   6  -2  117.89   18.56
  20  -6  -2  146.67   23.05
   6  20   2  125.19   22.83
  -6 -20   2   77.92   16.90
  20  -6   2  135.04   22.02
 -20   6   2  120.39   21.73
  -7 -20  -2  128.58   20.27
 -20   7  -2   90.19   17.30
  20  -7  -2  120.64   21.52
   7  20  -2  107.49   22.78
  -7 -20   2  107.13   19.12
 -20   7   2  121.17   22.24
  20  -7   2   71.70   17.62
   7  20   2   67.85   17.22
   8  20  -2   33.19   14.79
  20  -8  -2   55.35   16.19
 -20   8  -2   20.01   11.10
  -8 -20  -2   46.57   14.49
  20  -8   2   23.32   13.51
 -20   8   2    9.75   12.37
   8  20   2   18.59   14.10
  -8 -20   2   17.67   11.64
  -9 -20  -2   75.64   16.57
   9  20  -2   79.51   19.10
  20  -9  -2   60.14   17.70
 -20   9  -2   63.95   15.62
  20  -9   2   70.62   18.54
 -20   9   2   88.67   20.77
   9  20   2   93.95   21.28
  -9 -20   2   91.10   18.44
 -10 -20  -2   16.56   12.32
  10  20  -2   17.81   14.40
  20 -10  -2   15.40   12.33
 -20  10  -2    4.65    9.69
  10  20   2    0.07   11.74
 -20  10   2    6.27   13.67
  20 -10   2   11.69   11.54
 -10 -20   2   23.51   12.98
 -20  11  -2   58.50   14.93
 -11 -20  -2   91.24   19.51
  20 -11  -2   79.39   18.58
  11  20  -2   68.65   19.50
  11  20   2   19.33   12.94
  20 -11   2   69.29   18.76
 -11 -20   2   96.38   20.47
 -20  11   2   85.98   19.89
 -12 -20  -2    6.76   10.98
  20 -12  -2    2.76   11.92
  12  20  -2   -3.95   12.04
 -20  12  -2    9.32   10.58
 -12 -20   2    0.90    9.53
 -20  12   2   -0.61   11.16
  12  20   2    8.53   12.27
  20 -12   2   14.84   12.24
 -13 -20  -2   58.91   15.91
 -20  13  -2   62.31   15.54
  20 -13  -2   79.50   21.00
  13  20  -2   58.72   18.79
  13  20   2   72.33   21.73
  20 -13   2   88.18   20.19
 -20  13   2   50.20   17.14
 -13 -20   2   30.07   14.04
  14  20  -2  -14.81   11.02
  20 -14  -2   55.31   16.41
 -20  14  -2   21.71   11.59
 -14 -20  -2   18.45   12.52
 -14 -20   2   -3.05   10.78
 -20  14   2   10.33   12.97
  14  20   2    9.21   14.79
  20 -14   2    8.92   12.88
  21  13  -2   -4.48   12.49
 -13  21  -2   -5.27   10.34
 -13  21  -2  -14.62   12.79
 -21 -13  -2  -11.49    9.50
  13 -21  -2    6.35   12.85
  13 -21   2    7.16   12.26
 -21 -13   2   -5.10    9.08
  21  13   2    7.07   11.40
 -13  21   2   -7.57   11.12
  12 -21  -2   47.85   16.12
 -12  21  -2   48.22   18.20
 -21 -12  -2   68.57   17.57
  21  12  -2   44.03   18.30
 -12  21  -2   47.58   15.78
  21  12   2   67.14   19.23
 -12  21   2   26.50   15.56
  12 -21   2   34.65   14.50
 -21 -12   2   32.88   13.61
 -21 -11  -2    1.47    8.93
 -11  21  -2   -5.32   11.57
 -11  21  -2  -14.65    9.92
  21  11  -2    9.67   13.90
  11 -21  -2    1.37   10.98
  11 -21   2    8.02   11.48
  21  11   2    8.81   12.40
 -21 -11   2   -2.51    9.33
 -11  21   2    6.44   13.57
  21  10  -2   46.54   18.43
 -10  21  -2   29.59   13.56
 -10  21  -2   70.00   17.19
  10 -21  -2   35.25   14.27
 -21 -10  -2   44.91   13.87
  10 -21   2   59.29   16.26
 -21 -10   2   39.66   12.83
  21  10   2   42.41   15.75
 -10  21   2   54.69   17.74
  -9  21  -2   75.42   18.16
   9 -21  -2  115.87   19.77
 -21  -9  -2   69.30   16.03
  -9  21  -2   58.04   15.39
  21   9  -2   83.12   20.91
 -21  -9   2   67.12   14.33
   9 -21   2   66.83   16.14
  -9  21   2   33.93   14.97
  21   9   2   47.53   16.54
  21   8  -2   40.35   15.76
   8 -21  -2   49.27   14.19
  -8  21  -2   43.88   14.78
 -21  -8  -2   70.26   15.90
  -8  21  -2   83.51   16.82
   8 -21   2   57.01   14.68
  -8  21   2   49.06   16.66
 -21  -8   2   66.16   14.63
  21   8   2   41.71   14.84
   8 -21   2   36.01   13.61
  21   7  -2   13.78   11.83
   7 -21  -2   -6.24    8.84
  -7  21  -2   17.44   12.49
 -21  -7  -2    8.87    9.42
  -7  21  -2   13.64   12.03
   7 -21   2    5.57    9.98
  -7  21   2    7.05   13.43
  21   7   2   -0.98    9.22
 -21  -7   2    6.74    9.27
   7 -21   2    1.15    7.73
 -21  -6  -2  103.17   16.71
  21   6  -2   76.17   20.20
  -6  21  -2   87.85   16.52
 -21  -6  -2   48.27   13.32
   6 -21  -2   59.00   15.38
  -6  21  -2  107.71   21.00
  -6  21   2   94.55   19.82
   6 -21   2  101.60   16.93
 -21  -6   2   70.47   13.65
   6 -21   2  101.80   18.29
  21   6   2   94.67   18.62
   5 -21  -2   29.42    9.61
  -5  21  -2   27.88   14.08
   5 -21  -2   26.85   11.73
  21   5  -2   36.05   13.62
  -5  21  -2   25.15   11.76
  21   5  -2   12.96   13.68
  21   5   2   42.11   15.38
   5 -21   2   16.52   10.45
   5 -21   2   60.29   13.28
 -21  -5   2   26.17    9.50
  -5  21   2   49.32   17.28
  21   4  -2  158.26   19.16
   4 -21  -2  154.56   18.88
  21   4  -2  111.11   21.67
  -4  21  -2  129.83   21.94
   4 -21  -2  136.38   19.13
   4 -21   2  143.10   18.33
   4 -21   2  108.53   18.68
  21   4   2  124.80   20.58
  -4  21   2  140.62   24.22
 -21  -4   2  112.74   16.07
   3 -21  -2  116.44   17.27
  21   3  -2   69.08   18.39
  21   3  -2   90.20   16.04
  -3  21  -2   91.42   21.30
   3 -21  -2   76.89   15.41
   3 -21   2   89.37   14.73
 -21  -3   2  105.17   14.50
  -3  21   2  101.47   21.76
   3 -21   2  106.90   18.92
  21   3   2   68.47   17.66
  21   2  -2   95.83   16.24
  -2  21  -2  120.19   22.08
   2 -21  -2   80.56   15.07
   2 -21  -2  107.27   16.55
  21   2  -2  103.67   21.08
  21   2   2  122.40   20.57
  21   2   2  145.50   20.63
 -21  -2   2  109.75   14.80
   2 -21   2  106.92   18.62
  -2  21   2   50.12   16.24
   1 -21  -2  140.04   18.85
   1 -21  -2  170.57   19.13
  21   1  -2  111.39   17.95
  21   1  -2  140.65   23.59
  -1  21  -2  103.34   20.81
  21   1   2  173.04   22.20
 -21  -1   2  134.22   15.79
   1 -21   2  122.60   20.36
  21   1   2  125.44   21.25
  -1  21   2  165.19   26.46
  21   0  -2  159.65   20.91
 -21   0  -2  103.82   18.12
   0  21  -2  113.10   20.88
   0 -21  -2  153.86   20.01
   0 -21  -2  171.59   19.06
   0  21   2  121.74   22.01
 -21   0   2  136.20   21.68
   0 -21   2  108.87   19.21
  21   0   2  139.91   21.50
  -1 -21  -2    7.43    9.65
   1  21  -2   -4.30   10.53
  21  -1  -2    6.23    9.10
 -21   1  -2    6.01    9.33
 -21   1   2   11.96   11.32
  21  -1   2    6.88   10.35
   1  21   2   17.57   14.68
  -1 -21   2   -1.11    8.69
   2  21  -2   62.51   17.20
 -21   2  -2   77.48   16.31
  21  -2  -2   64.36   14.63
  -2 -21  -2   79.25   16.05
   2  21   2   90.95   21.98
  21  -2   2   68.30   16.62
 -21   2   2   54.81   16.33
  -2 -21   2   83.94   16.63
   3  21  -2    4.66   11.43
 -21   3  -2   22.85   10.61
  21  -3  -2    8.04   11.80
  -3 -21  -2   16.93   10.64
   3  21   2   42.21   15.77
 -21   3   2   12.81   11.48
  21  -3   2   37.24   13.54
  -3 -21   2   17.01   10.60
  -4 -21  -2   76.78   16.21
 -21   4  -2   67.92   15.70
   4  21  -2  100.62   21.61
  21  -4  -2   82.00   18.77
  -4 -21   2   79.22   16.92
  21  -4   2   88.13   19.14
   4  21   2   81.01   19.76
 -21   4   2   64.12   17.57
 -21   5  -2    6.38    9.88
  21  -5  -2   35.30   14.82
   5  21  -2   14.07   13.20
  -5 -21  -2   17.81   11.96
  21  -5   2    0.42    8.49
  -5 -21   2   28.09   13.09
 -21   5   2    7.76   11.35
   5  21   2   12.58   12.97
 -21   6  -2   95.39   17.34
  -6 -21  -2  114.59   19.15
  21  -6  -2  134.25   22.67
   6  21  -2  102.13   22.16
  -6 -21   2   99.19   20.20
 -21   6   2  104.39   20.33
   6  21   2  118.43   23.11
  21  -6   2  147.33   22.91
 -21   7  -2   16.95   11.87
  21  -7  -2   31.49   14.79
   7  21  -2   26.36   14.30
  -7 -21  -2   35.67   14.11
  -7 -21   2   15.95   10.72
  21  -7   2   11.26   13.95
 -21   7   2   39.80   15.14
   7  21   2   18.30   14.59
   8  21  -2   48.27   18.08
  21  -8  -2   35.48   16.49
 -21   8  -2   25.01   12.05
  -8 -21  -2   28.98   13.29
  -8 -21   2   12.73   10.93
   8  21   2   43.55   17.05
  21  -8   2   16.46   13.27
 -21   8   2   13.39   13.20
  21  -9  -2  -17.24    9.85
 -21   9  -2   -9.15    9.11
   9  21  -2    9.58   11.27
  -9 -21  -2    2.10    9.92
  -9 -21   2    1.18    9.58
   9  21   2    9.81   13.69
  21  -9   2  -20.03    8.32
 -21   9   2   -1.84   10.42
  21 -10  -2   83.19   20.97
 -10 -21  -2   75.03   18.17
 -21  10  -2  111.45   19.02
  10  21  -2   72.56   21.17
 -21  10   2   91.17   20.17
  21 -10   2   78.58   19.69
 -10 -21   2   90.53   19.34
  10  21   2  117.52   24.21
 -11 -21  -2    8.65   11.38
 -21  11  -2   -3.24   10.19
  21 -11  -2   -0.28   13.32
  11  21  -2   15.31   13.41
 -21  11   2  -13.57    9.86
 -11 -21   2   10.25   12.04
  21 -11   2   19.33   14.10
  11  21   2    2.70   13.18
  12  21  -2  113.48   24.86
 -21  12  -2  122.19   20.60
 -12 -21  -2  152.25   25.27
  21 -12  -2  143.40   26.59
  12  21   2  138.64   25.99
 -21  12   2   85.32   20.90
  21 -12   2  101.30   21.86
 -12 -21   2  191.49   27.50
 -13 -21  -2   18.88   13.38
  21 -13  -2   -4.67   13.68
  13  21  -2   -7.10   12.81
 -21  13  -2   24.69   12.57
 -13 -21   2   -8.99    9.84
  13  21   2   20.56   16.33
 -21  13   2   -5.05   11.77
  21 -13   2   22.96   14.07
 -22 -11  -2   85.04   19.05
  22  11  -2   57.76   19.35
 -11  22  -2   47.39   16.34
  11 -22  -2   39.10   15.45
 -11  22  -2   77.18   18.34
  11 -22   2   29.99   14.01
  22  11   2   36.11   15.82
 -22 -11   2   38.28   14.41
 -11  22   2   57.35   19.61
 -10  22  -2    4.03   11.91
  22  10  -2  -20.30   10.10
 -22 -10  -2    6.18   10.05
  10 -22  -2  -16.74    8.92
 -10  22  -2   -0.73   12.13
 -10  22   2    2.95   12.77
 -22 -10   2   -6.33    8.14
  10 -22   2   10.58   11.88
  22  10   2   12.07   12.43
  -9  22  -2   88.87   18.63
 -22  -9  -2   92.44   18.99
  -9  22  -2   55.85   17.03
   9 -22  -2   70.30   17.46
  22   9  -2   53.51   18.69
   9 -22   2   69.71   16.91
 -22  -9   2   85.33   16.56
  22   9   2   61.94   17.79
  -9  22   2  114.97   23.52
 -22  -8  -2    3.74   10.51
  -8  22  -2   10.67   12.60
   8 -22  -2   21.94   11.69
  -8  22  -2   10.91   12.94
  22   8  -2    6.85   12.78
 -22  -8   2    1.92    8.63
  22   8   2    9.99   11.76
   8 -22   2   -0.89    9.46
   8 -22   2    9.13   10.77
  -8  22   2   -1.47   10.90
  -7  22  -2  145.62   21.24
  22   7  -2  157.17   26.42
  -7  22  -2  157.61   25.38
 -22  -7  -2  142.46   20.46
   7 -22  -2  125.42   20.67
   7 -22   2  135.41   21.03
  22   7   2  152.44   24.50
   7 -22   2  161.60   21.96
 -22  -7   2  148.83   19.89
  -7  22   2  187.54   29.85
  -6  22  -2   34.11   14.75
 -22  -6  -2   20.79   11.15
 -22  -6  -2   41.42   15.60
   6 -22  -2   38.88   13.12
  22   6  -2   24.23   15.07
   6 -22   2   28.95   11.92
  -6  22   2   19.84   14.63
 -22  -6   2   29.45   11.76
   6 -22   2   24.81   11.63
  22   6   2   37.17   14.63
  22   5  -2   51.86   17.73
   5 -22  -2   92.57   17.17
  -5  22  -2   53.75   17.27
 -22  -5   2   63.25   14.16
   5 -22   2   70.86   15.16
  22   5   2   73.21   17.63
   5 -22   2   95.66   18.21
  -5  22   2   55.10   18.01
  22   4  -2    5.16   13.65
  -4  22  -2   17.55   13.64
   4 -22  -2    6.01    9.64
  22   4  -2    4.03    7.87
   4 -22  -2   12.89    8.25
 -22  -4   2   15.62    8.74
  22   4   2    6.48   11.35
   4 -22   2    0.89    9.51
  -4  22   2   -0.32   12.14
  22   3  -2   83.33   20.43
   3 -22  -2  109.07   17.67
   3 -22  -2   84.72   14.90
  22   3  -2   72.20   15.14
  -3  22  -2   69.85   19.24
   3 -22   2  148.20   21.13
  22   3   2  140.33   22.98
  -3  22   2  112.49   22.77
 -22  -3   2  109.86   16.03
   2 -22  -2   42.30   12.43
  -2  22  -2   42.29   15.87
   2 -22  -2   36.65   11.42
  22   2  -2   26.96   11.88
  22   2  -2   28.04   14.16
   2 -22   2   63.65   15.33
  22   2   2   43.47   15.17
 -22  -2   2   48.81   12.33
  -2  22   2   28.07   14.84
  22   1  -2  132.71   19.79
   1 -22  -2  134.00   19.63
  -1  22  -2  119.03   21.45
   1 -22   2  123.91   21.20
 -22  -1   2  125.04   22.50
  22   1   2  110.05   19.38
  -1  22   2  132.31   24.46
 -22   0  -2   20.66   11.69
  22   0  -2   61.07   14.39
   0  22  -2   57.64   18.14
   0 -22  -2   47.68   13.05
 -22   0   2   50.77   16.85
   0  22   2   73.65   19.24
  22   0   2   40.97   14.86
   0 -22   2   59.77   14.85
  22  -1  -2   69.58   17.17
 -22   1  -2   49.97   14.62
  -1 -22  -2   75.30   16.18
   1  22  -2   69.12   20.15
  22  -1   2   38.84   14.65
   1  22   2   57.87   19.24
  -1 -22   2   57.70   15.33
 -22   1   2   45.23   15.47
 -22   2  -2   19.28   11.26
  22  -2  -2    3.52   10.22
  -2 -22  -2    6.62    9.39
   2  22  -2    7.15   12.63
  22  -2   2   23.64   12.51
 -22   2   2   10.77   11.50
  -2 -22   2   12.11   10.25
   2  22   2   16.55   13.98
   3  22  -2   99.03   20.61
  22  -3  -2   96.47   18.57
  -3 -22  -2   62.47   15.22
 -22   3  -2   98.91   18.30
  22  -3   2  102.99   19.78
   3  22   2  139.24   25.34
 -22   3   2   86.95   19.76
  -3 -22   2  139.18   23.23
   4  22  -2   -9.08   10.17
  22  -4  -2    5.85   10.83
  -4 -22  -2   -0.29    9.11
 -22   4  -2   15.58    9.87
 -22   4   2   16.61   12.50
  -4 -22   2   15.47   10.93
  22  -4   2   26.00   13.52
   4  22   2    1.65   11.10
   5  22  -2  100.76   21.60
  -5 -22  -2   89.36   18.06
  22  -5  -2   92.97   20.25
 -22   5  -2   85.92   17.09
  22  -5   2  115.88   22.96
   5  22   2   65.88   20.39
  -5 -22   2  107.73   20.00
 -22   5   2   91.60   20.18
 -22   6  -2   51.78   13.99
  22  -6  -2    2.75   12.56
  -6 -22  -2   36.15   13.57
   6  22  -2   24.88   14.27
  22  -6   2   36.45   16.25
  -6 -22   2   17.18   12.93
   6  22   2    7.60   15.72
 -22   6   2   15.40   12.86
   7  22  -2   26.08   16.05
  -7 -22  -2   13.33   11.39
 -22   7  -2   48.15   14.70
  22  -7  -2   15.26   13.36
 -22   7   2   30.91   14.85
  -7 -22   2   60.87   16.56
  22  -7   2   54.06   17.55
   7  22   2   31.12   17.78
  -8 -22  -2   13.93   11.70
 -22   8  -2   36.24   13.70
   8  22  -2   22.41   12.40
  22  -8  -2   -9.79   10.20
 -22   8   2    4.02   11.88
   8  22   2   -7.55   11.50
  22  -8   2   -5.81   13.35
  -8 -22   2    2.51   10.50
  -9 -22  -2   48.54   15.01
  22  -9  -2   71.83   20.98
   9  22  -2   84.51   21.72
 -22   9  -2   52.82   15.68
  22  -9   2   90.36   22.17
 -22   9   2  116.56   22.84
   9  22   2   54.20   18.75
  -9 -22   2   82.74   19.57
  22 -10  -2   11.21   12.45
 -10 -22  -2    5.53   11.42
  10  22  -2    1.34   14.30
 -22  10  -2  -11.83    9.40
  22 -10   2  -17.74   11.79
 -22  10   2   -0.38   11.60
 -10 -22   2   -0.21   10.20
  10  22   2    2.56   11.77
  11  22  -2   19.47   15.67
 -11 -22  -2   67.09   17.66
  22 -11  -2   30.94   17.10
 -22  11  -2   50.07   16.10
 -22  11   2   72.75   20.87
  11  22   2   76.71   20.38
  22 -11   2   53.34   17.55
 -11 -22   2   95.82   20.23
  -9  23  -2   11.15   13.76
 -23  -9  -2   15.87   11.50
   9 -23  -2    0.92   10.39
  -9  23  -2   20.69   13.56
  23   9  -2    2.45   12.58
 -23  -9   2    1.98    8.77
  23   9   2   19.23   14.01
   9 -23   2   -4.04   10.29
  -9  23   2  -27.23   10.01
 -23  -8  -2   50.51   16.00
  -8  23  -2   33.88   16.67
   8 -23  -2   37.91   14.69
  23   8  -2   73.20   21.02
   8 -23   2   -0.44   10.31
  -8  23   2   37.57   17.88
  23   8   2   42.70   17.29
 -23  -8   2   55.56   13.94
   7 -23  -2  100.35   18.90
  23   7  -2   27.08   16.78
 -23  -7  -2   78.70   17.16
  -7  23  -2   69.58   18.52
  -7  23   2   47.56   19.03
 -23  -7   2  105.33   17.64
   7 -23   2   61.96   15.82
  23   7   2   70.65   18.66
   7 -23   2   92.53   19.10
  23   6  -2  185.39   29.85
   6 -23  -2  161.84   22.44
 -23  -6  -2  197.03   23.73
  -6  23  -2  132.51   23.26
   6 -23   2  155.73   22.31
  -6  23   2  225.75   32.85
 -23  -6   2  209.20   22.85
  23   6   2  216.46   28.79
  23   5  -2   27.05   16.23
 -23  -5  -2   55.70   15.33
   5 -23  -2   35.48   13.27
  -5  23  -2   37.96   16.34
 -23  -5  -2   13.53   10.77
   5 -23   2   22.87   12.33
  -5  23   2   41.01   16.38
  23   5   2   25.04   14.22
 -23  -5   2   32.40   11.81
  23   4  -2   77.14   21.37
   4 -23  -2   41.39   13.25
  -4  23  -2   57.45   18.90
  -4  23   2   70.29   20.90
   4 -23   2   81.50   19.09
  23   4   2  114.62   23.06
 -23  -4   2  104.93   16.31
   3 -23  -2   -5.38    7.57
  23   3  -2   25.82   14.23
   3 -23  -2    3.93   11.00
  -3  23  -2   10.61   13.11
  23   3  -2   -5.91    8.10
  23   3   2   -7.77   10.55
   3 -23   2   -1.54    9.04
  -3  23   2    1.09   13.89
  -2  23  -2   53.26   17.62
  23   2  -2   60.90   15.44
   2 -23  -2   65.92   14.58
  23   2  -2   54.54   18.37
  23   2   2   81.02   18.97
  -2  23   2   31.80   16.04
   2 -23   2   57.13   15.68
   1 -23  -2    6.70    8.68
 -23  -1  -2    1.40    8.37
  -1  23  -2    3.28   12.29
  23   1  -2   10.35   10.96
   1 -23   2    0.10    9.16
 -23  -1   2    6.73   11.54
  -1  23   2   -6.31   10.84
  23   1   2    1.87   10.07
   0 -23  -2   42.72   14.16
  23   0  -2   54.24   14.77
 -23   0  -2   32.18   12.65
   0  23  -2   27.15   15.54
   0  23   2   28.50   17.69
   0 -23   2   58.78   15.74
 -23   0   2   45.23   14.85
  23   0   2   66.08   16.95
  -1 -23  -2    9.14   10.76
  23  -1  -2    8.92   10.64
 -23   1  -2    5.43    9.22
   1  23  -2    5.95   13.57
   1  23   2    5.15   13.32
  -1 -23   2   -1.51    9.94
  23  -1   2    4.32   12.59
 -23   1   2    8.72   11.93
 -23   2  -2   41.60   13.29
  23  -2  -2   63.39   16.98
   2  23  -2   70.50   19.54
  -2 -23  -2   43.24   13.91
  -2 -23   2   63.79   16.49
  23  -2   2   47.83   16.26
   2  23   2   54.00   17.47
 -23   2   2   41.25   15.09
  -3 -23  -2    1.65    9.67
  23  -3  -2   -0.19   10.08
 -23   3  -2   -0.23    8.63
   3  23  -2   21.83   15.56
   3  23   2    4.43   13.14
  23  -3   2   13.22   11.98
  -3 -23   2    7.02   10.84
 -23   3   2   19.88   11.78
  -4 -23  -2   54.83   15.02
 -23   4  -2   30.71   12.28
  23  -4  -2   41.50   14.28
   4  23  -2   73.70   19.71
  -4 -23   2   60.33   15.99
 -23   4   2   85.09   19.98
  23  -4   2   55.86   16.50
   4  23   2   51.75   17.65
  -5 -23  -2   34.92   13.70
   5  23  -2    8.24   12.92
 -23   5  -2    1.89    9.05
  23  -5  -2   16.73   12.18
   5  23   2   16.67   15.52
  23  -5   2   26.40   14.18
  -5 -23   2   17.92   11.40
 -23   5   2   15.24   13.30
 -23   6  -2   88.69   17.75
  23  -6  -2   81.76   19.30
  -6 -23  -2   92.55   19.17
   6  23  -2   85.05   21.15
 -23   6   2  101.61   21.95
  23  -6   2  105.01   21.30
   6  23   2  130.08   24.50
  -6 -23   2   73.08   18.84
   7  23  -2   -4.72   13.15
  -7 -23  -2    1.23   10.49
 -23   7  -2  -14.70    8.42
  23  -7  -2   -9.99   11.00
 -23   7   2    0.66   12.20
   7  23   2  -15.83   12.38
  23  -7   2    6.74   14.24
  -7 -23   2   13.17   13.04
 -23   8  -2   95.82   19.42
   8  23  -2  110.82   24.16
  -8 -23  -2  111.35   21.55
  23  -8  -2   82.96   21.73
  23  -8   2   68.82   18.89
  -8 -23   2  116.70   22.61
   8  23   2  150.71   28.24
 -23   8   2  130.85   25.19
 -23   9  -2   21.80   16.42
  23  -9  -2   18.81   14.96
  -9 -23  -2   -1.71   10.65
   9  23  -2   -5.93   12.63
  23  -9   2    9.16   14.24
 -23   9   2   -4.44   13.02
  -9 -23   2   20.59   14.06
   9  23   2   21.59   16.49
  -6  24  -2   46.24   18.27
 -24  -6  -2   47.45   15.30
  24   6  -2   37.87   19.26
   6 -24  -2   39.69   14.63
 -24  -6   2   71.87   15.24
  -6  24   2   47.32   18.59
  24   6   2   41.81   17.38
   6 -24   2   59.97   15.88
   5 -24  -2   45.27   17.59
  24   5  -2   56.29   20.23
 -24  -5  -2   67.68   15.42
  -5  24  -2   62.54   21.49
 -24  -5   2   95.60   21.23
  -5  24   2   59.55   20.81
  24   5   2   33.67   15.84
   5 -24   2   41.07   15.84
 -24  -4  -2   -8.67    8.89
  -4  24  -2   24.25   15.57
  24   4  -2   14.16   13.50
   4 -24   2   12.86   12.20
  -4  24   2   -6.27   13.12
  24   4   2    0.14   11.64
  -3  24  -2   49.20   18.30
  24   3  -2  101.81   23.51
   3 -24  -2   73.72   16.02
  -3  24   2   73.45   21.36
  24   3   2   72.76   18.97
   3 -24   2   57.46   15.47
  24   2  -2   14.59   11.44
 -24  -2  -2    9.14   12.28
   2 -24  -2   17.60   10.35
  -2  24  -2   18.44   14.35
  -2  24   2   33.70   17.15
 -24  -2   2   25.43   14.29
   2 -24   2   21.56   12.41
  -1  24  -2   57.00   18.76
   1 -24  -2   52.77   14.55
 -24  -1  -2   56.70   16.68
  24   1  -2   34.82   13.87
 -24  -1   2   25.77   14.20
  -1  24   2   80.45   22.53
   1 -24   2   45.44   14.24
 -24   0  -2   -8.13    9.05
   0 -24  -2   -6.34    8.86
   0  24  -2   -0.60   13.39
  24   0  -2   -7.71   10.08
   0  24   2  -10.01   13.51
   0 -24   2    7.48   11.13
  24   0   2    9.00   11.88
 -24   0   2   -3.11   10.71
  -1 -24  -2   43.59   14.58
   1  24  -2   77.59   21.38
  24  -1  -2   36.79   14.74
 -24   1  -2   51.85   15.69
   1  24   2   45.23   19.19
  24  -1   2   72.95   18.48
 -24   1   2   76.26   18.60
  -1 -24   2   62.99   15.87
   2  24  -2   51.01   18.57
 -24   2  -2   84.54   18.05
  24  -2  -2   50.34   15.35
  -2 -24  -2   82.55   17.80
  24  -2   2   65.05   19.01
 -24   2   2  109.95   22.90
  -2 -24   2   69.68   17.65
   2  24   2  105.22   24.90
   3  24  -2   20.53   14.78
 -24   3  -2   29.19   12.65
  24  -3  -2   28.53   14.66
  -3 -24  -2   45.58   15.11
   3  24   2   46.24   18.43
 -24   3   2   32.92   15.39
  24  -3   2   46.96   16.43
  -3 -24   2   31.73   13.12
  -4 -24  -2    9.49   11.62
  24  -4  -2    9.87   13.19
 -24   4  -2   36.64   13.79
   4  24  -2   18.92   14.80
 -24   4   2    7.08   12.27
  24  -4   2   43.84   15.99
  -4 -24   2   17.80   11.66
   4  24   2   13.64   14.63
  24  -5  -2   76.96   19.31
   5  24  -2  108.12   23.83
  -5 -24  -2  113.46   21.85
 -24   5  -2   96.82   18.67
 -24   5   2   60.72   17.79
  24  -5   2   96.61   21.31
   5  24   2   82.72   23.99
  -5 -24   2   86.12   20.29
  -6 -24  -2    2.11   11.14
 -24   6  -2   13.74   10.87
  24  -6  -2    3.43   12.96
   6  24  -2   14.59   14.67
   6  24   2   26.02   16.56
 -24   6   2   11.67   12.38
  24  -6   2   17.31   14.77
  -6 -24   2   44.74   15.32
   0   0  -3 3398.15   78.62
   0   0   3 3316.96   74.74
   0   1  -3   18.08    3.31
   0   1  -3   11.12    5.04
   0  -1  -3    9.95    5.72
  -1   0  -3    5.31    5.52
   1   0  -3   19.87    6.22
   0   1   3   10.57    3.34
   1   0   3   11.52    2.47
  -1   0   3   12.96    3.72
  -1   1  -3  890.57   26.72
   1   1  -3  923.45   24.63
  -1  -1  -3  892.09   26.61
   1   1  -3  912.27   27.16
   1  -1  -3  902.95   27.14
   1   1   3  921.27   23.27
  -1  -1   3  896.31   25.68
  -1   1   3  886.88   25.33
   1  -2  -3  278.00   13.22
   2   1  -3  276.94   12.03
  -2  -1  -3  285.60   12.97
  -1   2  -3  277.50   12.74
  -1   2  -3  278.70    8.63
   2   1  -3  286.35   13.62
   2   1   3  284.75    9.45
  -1   2   3  271.68   12.12
  -2  -1   3  288.65   11.46
   0   2  -3 1374.66   36.86
   0  -2  -3 1374.71   36.77
   0   2  -3 1350.39   32.90
  -2   0  -3 1396.25   36.69
   2   0  -3 1341.24   36.18
   2   0  -3 1353.38   36.97
   0   2   3 1410.65   35.41
   0  -2   3 1373.64   36.89
   2   0   3 1377.79   30.82
  -2   0   3 1418.63   34.89
  -2   1  -3 9280.59  201.27
   2  -1  -3 9382.52  202.07
  -1  -2  -3 9087.65  201.00
   1   2  -3 9206.78  198.60
   1   2  -3 9255.77  201.72
  -2   1   3 8955.02  201.30
   1   2   3 9603.56  199.03
  -1  -2   3 9316.32  200.81
   2   2  -3 2054.03   50.12
  -2   2  -3 2036.24   44.38
  -2   2  -3 2010.15   51.16
   2  -2  -3 2093.15   51.10
   2  -2  -3 2014.06   51.69
   2   2  -3 2059.22   51.65
  -2  -2  -3 2060.20   50.91
   2  -2   3 2131.30   44.69
  -2  -2   3 2068.85   50.22
   2   2   3 2085.18   48.47
  -2   2   3 2027.56   51.87
   3   2  -3  311.63   14.02
  -3  -2  -3  328.92   13.74
  -2   3  -3  310.14   14.15
  -2   3  -3  309.79    9.59
   2  -3  -3  301.55   13.69
   3   2  -3  301.37   13.45
  -2   3   3  295.97   14.18
  -3  -2   3  314.52   12.65
   3   2   3  320.62   11.60
   1  -3  -3 5215.54  116.73
  -1   3  -3 5189.12  116.43
   3   1  -3 5036.65  116.70
  -1   3  -3 5144.78  111.81
  -3  -1  -3 5160.25  115.80
   3   1  -3 5143.05  116.71
  -3  -1   3 5146.74  114.16
  -1   3   3 5230.88  117.14
   3   1   3 5257.51  111.78
   1  -3   3 5220.89  117.90
   3   0  -3  140.29    8.58
   0  -3  -3  146.10    9.40
   0   3  -3  125.72    9.09
  -3   0  -3  146.56    9.87
   3   0  -3  126.80    9.86
   3   0  -3  152.37    9.56
   0   3  -3  147.41    7.36
  -3   0   3  134.48    7.10
   3   0   3  143.98    4.96
   0   3   3  147.21    8.93
   0  -3   3  151.84    9.22
   3  -1  -3  772.69   24.10
   1   3  -3  811.90   23.03
  -1  -3  -3  822.22   24.67
  -3   1  -3  800.22   25.16
   3  -1  -3  806.58   25.78
   1   3  -3  825.95   25.24
  -3   1   3  850.42   26.41
   1   3   3  858.93   24.22
  -1  -3   3  825.25   25.01
   3  -2  -3   34.61    6.06
  -2  -3  -3   34.86    5.97
   2   3  -3   48.42    6.08
  -3   2  -3   38.96    6.84
   2   3  -3   26.89    6.07
  -2  -3   3   34.52    5.21
   2   3   3   39.62    5.46
  -3   2   3   38.42    6.49
   3   3  -3  178.31   10.46
   3  -3  -3  196.15   11.24
   3   3  -3  193.03   11.15
  -3   3  -3  186.52    6.77
  -3   3  -3  185.34   11.57
  -3  -3  -3  203.20   10.85
  -3   3   3  202.13   12.19
   3   3   3  215.95   10.24
  -3  -3   3  217.99   10.74
  -3   4  -3   20.97    5.86
   4   3  -3   19.38    5.66
  -3   4  -3   23.48    3.66
  -4  -3  -3   22.86    5.37
   4   3  -3   23.89    3.97
   4   3  -3   28.88    5.99
   3  -4  -3   23.06    5.49
   4   3   3   19.70    4.59
  -4  -3   3   27.69    5.19
  -3   4   3   11.91    5.55
   3  -4   3   24.38    5.26
  -4  -2  -3  320.46   13.60
   2  -4  -3  316.32   14.29
  -2   4  -3  282.97   14.00
   4   2  -3  316.22   11.94
   4   2  -3  327.96   14.83
  -2   4  -3  313.61   11.02
   4   2  -3  319.14   14.35
   4   2   3  324.42   12.05
   2  -4   3  321.47   15.11
  -2   4   3  328.63   15.51
  -4  -2   3  299.84   12.55
   4   1  -3  187.22   11.19
  -1   4  -3  167.76    8.18
   4   1  -3  187.92    9.29
  -1   4  -3  191.33   10.65
  -4  -1  -3  181.49   10.44
   1  -4  -3  184.96   10.68
   1  -4  -3  173.49   10.34
   4   1  -3  173.67   10.92
  -1   4   3  156.88   10.22
   1  -4   3  171.09   10.65
   4   1   3  169.55    7.46
  -4  -1   3  178.78    8.66
   4   0  -3  226.59   13.05
  -4   0  -3  229.39   12.17
   0   4  -3  247.74   12.32
   0  -4  -3  246.98   11.86
   4   0  -3  237.76   11.06
   0   4  -3  236.88   10.22
  -4   0   3  233.90    9.43
   0   4   3  231.56   12.10
   0  -4   3  258.00   12.37
   4   0   3  241.11    7.68
  -4   1  -3  132.59    9.90
  -1  -4  -3  109.92    8.36
  -4   1  -3  130.07    4.94
   1   4  -3  128.34    9.47
   1   4  -3  110.47    7.86
   4  -1  -3  125.40    8.84
  -4   1   3  127.47   10.16
   1   4   3  123.96    8.95
  -1  -4   3  123.79    8.68
  -4   1   3  116.75    6.05
   4  -2  -3  379.57   15.54
   2   4  -3  369.45   15.61
  -4   2  -3  387.78    9.90
  -2  -4  -3  381.60   14.96
  -4   2  -3  379.61   16.11
   2   4  -3  399.29   15.37
  -4   2   3  373.72   17.46
  -2  -4   3  404.18   16.01
   2   4   3  388.61   15.40
  -3  -4  -3  109.51    8.45
   3   4  -3  109.13    8.88
   4  -3  -3  106.14    8.81
   3   4  -3  104.31    9.46
  -4   3  -3   94.56    9.69
  -4   3  -3  103.31    5.05
   4  -3   3   91.21    9.23
  -3  -4   3  110.93    8.66
  -4   3   3  126.54   10.61
   3   4   3  110.86    8.47
  -4   4  -3 1031.60   25.94
   4  -4  -3 1048.20   31.69
  -4   4  -3 1005.21   31.73
   4   4  -3 1011.20   25.71
   4   4  -3 1006.95   29.80
   4   4  -3 1032.25   31.85
  -4  -4  -3 1016.11   28.67
   4  -4   3 1054.62   31.76
  -4  -4   3 1007.47   30.42
   4   4   3 1016.93   30.40
  -4   4   3  958.26   32.72
  -5  -4  -3   33.85    6.55
   5   4  -3   32.84    6.99
   5   4  -3   33.00    7.42
  -4   5  -3   41.30    7.88
   4  -5  -3   36.52    3.07
   4  -5  -3   29.34    7.73
   5   4  -3   25.75    4.39
  -4   5  -3   28.76    4.96
   4  -5   3   26.14    6.72
   5   4   3   20.30    6.04
  -4   5   3   28.95    7.88
  -5  -4   3   26.23    5.80
  -3   5  -3  640.47   22.77
   3  -5  -3  604.78   22.67
   5   3  -3  603.03   22.91
   5   3  -3  632.39   21.83
   5   3  -3  628.53   18.46
  -5  -3  -3  624.27   20.84
  -3   5  -3  637.24   19.10
  -5  -3   3  612.99   20.93
   3  -5   3  603.33   21.92
   5   3   3  606.66   20.55
  -3   5   3  643.96   24.60
  -5  -2  -3    4.82    4.43
   5   2  -3    7.56    4.94
  -2   5  -3    4.48    5.07
  -2   5  -3    0.95    3.02
   5   2  -3    1.12    3.08
   2  -5  -3    4.44    4.72
  -2   5   3    5.84    4.70
  -5  -2   3    0.99    2.80
   2  -5   3    0.95    3.63
   2  -5   3    2.51    3.76
   5   2   3    6.01    3.28
   1  -5  -3  992.16   29.94
  -1   5  -3  994.75   27.68
  -5  -1  -3  972.45   29.27
  -1   5  -3  993.94   29.29
   5   1  -3  974.95   27.71
   5   1  -3  997.58   31.67
  -1   5   3 1002.17   31.39
   1  -5   3 1029.04   31.09
  -5  -1   3 1014.55   27.25
   5   1   3  992.85   25.90
   0   5  -3  123.50    8.33
   0  -5  -3  116.85    8.57
  -5   0  -3  118.79    9.72
   0   5  -3  128.06    9.39
   5   0  -3  116.61    8.62
   5   0  -3  134.65   12.21
   0   5   3  113.89    9.68
  -5   0   3  102.76    6.38
   0  -5   3  108.31    9.98
   5   0   3  113.78    5.93
   1   5  -3 1001.45   29.04
  -5   1  -3 1036.72   30.73
   5  -1  -3  993.32   29.57
  -1  -5  -3 1012.15   28.53
   1   5  -3  989.53   29.35
  -1  -5   3  984.34   30.32
  -5   1   3 1011.72   32.99
   1   5   3 1028.13   30.91
   5  -1   3  992.29   24.64
  -5   1   3 1000.00   25.03
  -5   2  -3    2.54    4.74
   5  -2  -3    1.11    4.68
   2   5  -3    4.37    4.19
   2   5  -3    5.62    4.85
  -5   2  -3    5.60    2.05
  -2  -5  -3    8.15    4.55
  -5   2   3    3.87    5.23
  -5   2   3    6.40    2.06
   2   5   3   -1.77    3.74
  -2  -5   3    3.01    3.36
   5  -2   3    4.22    4.88
   5  -3  -3   10.90    5.51
  -5   3  -3    1.93    6.04
   3   5  -3   14.64    5.61
  -5   3  -3    1.36    2.19
   3   5  -3    9.50    5.05
  -3  -5  -3   13.84    5.15
  -3  -5   3   -3.11    3.59
   5  -3   3    6.47    4.68
   3   5   3    6.80    4.68
  -5   3   3   -3.66    4.75
  -4  -5  -3   92.72    8.86
   4   5  -3   93.67    9.30
   4   5  -3   86.93   10.48
   5  -4  -3   74.57    9.53
  -5   4  -3   78.87    6.15
  -5   4  -3   72.63   10.18
   4   5   3   74.89    8.85
  -4  -5   3   85.61    9.55
  -5   4   3   76.27   10.71
   5  -4   3   81.05    9.90
   5   5  -3   11.46    5.90
  -5  -5  -3   17.70    6.22
   5  -5  -3    7.60    6.82
   5   5  -3    7.43    6.60
   5   5  -3   13.42    3.45
  -5   5  -3    4.98    4.02
  -5   5  -3    7.93    6.97
  -5   5   3    9.13    7.59
  -5  -5   3   13.71    5.95
   5  -5   3   26.38    7.54
   5   5   3   10.19    5.79
   5  -6  -3   34.01    9.28
   6   5  -3   36.48    4.76
  -5   6  -3   26.54    8.36
   6   5  -3   37.84    9.00
  -5   6  -3   23.16    5.74
  -6  -5  -3   33.23    7.04
  -6  -5   3   34.60    7.19
   6   5   3   40.94    8.22
  -5   6   3   37.79   10.15
   5  -6   3   32.52    7.95
   4  -6  -3   15.24    3.15
  -4   6  -3   24.86    5.57
  -4   6  -3   10.34    8.44
  -6  -4  -3   12.14    6.29
   4  -6  -3   30.01    8.32
   6   4  -3   21.61    4.63
   6   4  -3   14.34    7.06
  -4   6   3   26.10    8.42
   6   4   3   23.20    6.16
   4  -6   3   11.14    6.26
  -6  -4   3   22.91    6.22
  -6  -3  -3   41.99    7.29
   3  -6  -3   41.99    4.43
  -3   6  -3   28.54    5.72
   3  -6  -3   31.39    7.84
   6   3  -3   32.10    5.56
  -3   6  -3   19.53    6.98
   6   3  -3   37.50    8.27
   6   3   3   44.38    7.08
  -3   6   3   35.71    7.97
  -6  -3   3   33.87    6.22
   3  -6   3   39.11    7.92
   3  -6   3   34.35    6.72
  -2   6  -3  582.98   19.80
  -2   6  -3  590.85   21.93
   6   2  -3  600.56   24.05
   6   2  -3  582.26   19.23
  -6  -2  -3  593.51   21.04
   2  -6  -3  573.86   21.74
   2  -6   3  581.50   22.68
  -6  -2   3  581.27   19.60
  -2   6   3  566.55   23.87
   2  -6   3  584.81   20.75
   6   2   3  581.46   19.41
  -1   6  -3   60.89    8.19
   1  -6  -3   47.20    7.79
  -1   6  -3   47.89    6.54
   6   1  -3   46.79    6.71
   6   1  -3   52.54    8.77
  -6  -1  -3   46.35    7.66
  -6  -1   3   54.57    6.11
  -1   6   3   41.47    8.04
   1  -6   3   40.34    6.81
   6   1   3   52.40    5.65
   1  -6   3   50.14    6.61
   6   0  -3  655.74   22.03
  -6   0  -3  662.31   23.48
   0   6  -3  639.56   22.04
   0  -6  -3  630.67   22.21
   6   0  -3  603.66   24.74
   0   6  -3  671.17   22.26
   0  -6   3  645.15   23.69
  -6   0   3  669.01   19.07
   0   6   3  686.41   25.00
   6   0   3  604.55   18.70
  -1  -6  -3    4.31    4.52
   1   6  -3   -1.60    4.27
   1   6  -3    7.94    5.57
   6  -1  -3    4.79    4.66
   6  -1  -3    2.54    5.52
  -6   1  -3   10.37    5.77
   1   6   3    9.74    5.12
   6  -1   3    8.92    3.12
  -6   1   3   10.18    2.69
  -1  -6   3    9.02    4.84
   6  -1   3    3.21    5.28
   2   6  -3  563.55   16.73
  -6   2  -3  586.21   22.31
   2   6  -3  546.03   21.20
  -2  -6  -3  562.53   18.99
   2   6  -3  549.75   20.40
  -6   2  -3  568.74   16.74
   6  -2  -3  595.78   22.27
   6  -2   3  589.42   22.68
  -6   2   3  599.99   25.19
  -2  -6   3  555.37   21.77
  -6   2   3  546.67   14.77
   2   6   3  579.11   22.72
  -3  -6  -3 1043.19   28.97
   6  -3  -3 1014.87   32.68
  -6   3  -3 1050.70   26.98
   3   6  -3 1041.56   30.90
  -6   3  -3 1042.62   33.23
   3   6  -3 1020.51   25.84
   3   6  -3 1023.59   33.05
   3   6   3 1073.25   33.55
   6  -3   3 1046.82   33.56
  -3  -6   3 1052.39   33.09
  -6   3   3 1015.48   35.43
   6  -4  -3  830.13   28.67
  -6   4  -3  800.09   28.59
  -4  -6  -3  759.47   24.07
   4   6  -3  785.41   28.56
  -6   4  -3  810.42   22.81
   4   6  -3  819.56   25.92
  -4  -6   3  793.58   27.71
   4   6   3  774.59   27.99
   6  -4   3  836.96   29.25
  -6   4   3  841.05   31.33
   6  -5  -3   93.50   11.72
   5   6  -3   96.15    5.48
  -5  -6  -3  111.41   10.02
   5   6  -3   94.00    9.83
  -6   5  -3  101.26    7.97
   5   6  -3   91.16   11.40
  -5  -6   3   82.84    9.93
  -6   5   3   85.25   11.89
   6  -5   3  112.25   12.74
   5   6   3  103.03   11.65
   6   6  -3  988.68   34.39
   6  -6  -3  948.00   33.39
  -6  -6  -3  914.22   27.21
   6   6  -3  934.28   23.07
  -6   6  -3  928.57   27.91
  -6   6   3  878.21   34.64
  -6  -6   3  946.40   31.74
   6  -6   3  987.27   33.34
   6   6   3  948.02   32.50
   7   6  -3   19.84    7.62
  -6   7  -3   21.15    5.77
  -7  -6  -3   17.76    5.96
   6  -7  -3    5.19    7.03
   7   6  -3   27.02    3.79
  -6   7   3   20.51    8.13
  -7  -6   3   11.22    5.87
   6  -7   3   37.18    8.51
   7   6   3   12.19    6.43
  -5   7  -3 2386.18   63.64
  -5   7  -3 2419.64   59.54
  -7  -5  -3 2329.90   58.08
   5  -7  -3 2373.95   52.89
   7   5  -3 2272.08   64.95
   5  -7  -3 2360.56   64.18
   7   5  -3 2320.75   54.79
   5  -7   3 2404.04   63.35
   7   5   3 2426.26   63.07
  -5   7   3 2440.59   67.95
  -7  -5   3 2362.08   61.86
   4  -7  -3   42.68   10.11
   4  -7  -3   56.99    5.19
  -7  -4  -3   74.91    9.43
  -4   7  -3   62.48    8.53
  -4   7  -3   62.76   10.90
   7   4  -3   62.53   10.99
   7   4  -3   72.94    7.01
   7   4   3   77.64    9.52
  -7  -4   3   95.07   10.29
   4  -7   3   41.48    8.29
   4  -7   3   64.85    8.98
  -4   7   3   53.56   10.39
  -3   7  -3  606.99   21.78
  -7  -3  -3  603.52   21.95
   7   3  -3  601.95   19.68
  -3   7  -3  599.13   23.81
   3  -7  -3  597.60   17.85
   7   3  -3  596.11   25.65
   3  -7  -3  584.20   23.99
  -7  -3   3  587.17   21.39
   7   3   3  576.11   21.49
   3  -7   3  593.51   22.56
   3  -7   3  580.02   23.76
  -3   7   3  602.39   25.92
  -2   7  -3    4.40    6.94
   2  -7  -3   10.63    3.78
  -7  -2  -3   -0.38    6.20
  -2   7  -3   -2.57    4.63
   7   2  -3    0.99    5.68
   2  -7  -3   -3.58    5.16
   7   2  -3    9.71    5.12
  -7  -2   3    2.02    3.89
   2  -7   3    4.26    4.93
  -2   7   3    6.77    6.03
   2  -7   3   -5.87    4.50
   7   2   3    9.01    4.22
   7   1  -3   43.27    7.51
   7   1  -3   50.60   10.12
  -7  -1  -3   65.21    9.35
   1  -7  -3   42.09    8.11
  -1   7  -3   43.55    7.57
  -1   7  -3   62.92    9.16
   1  -7   3   55.07    7.47
   7   1   3   57.00    6.74
   1  -7   3   39.17    7.14
  -1   7   3   50.97    9.60
  -7  -1   3   55.60    6.43
   7   0  -3  359.55   16.51
   0   7  -3  387.43   17.35
  -7   0  -3  343.72   17.16
   0  -7  -3  365.48   17.13
   7   0  -3  341.19   19.67
   0   7  -3  367.80   17.00
   0  -7   3  368.57   17.84
  -7   0   3  354.83   13.11
   7   0   3  344.18   14.02
   0   7   3  341.75   18.63
  -7   1  -3   77.48   10.76
   1   7  -3   80.81    9.60
  -1  -7  -3  101.78   10.56
   1   7  -3   66.83    8.97
   7  -1  -3   64.30   10.10
   7  -1  -3   79.28   10.15
   7  -1   3   90.88    7.93
   1   7   3   68.68   10.37
   7  -1   3   66.96    9.77
  -7   1   3   65.71    5.77
  -1  -7   3   78.39    9.81
   2   7  -3  282.86   16.02
   2   7  -3  230.30   13.95
  -2  -7  -3  241.57   12.02
  -7   2  -3  239.27   11.18
   2   7  -3  249.25   10.12
   7  -2  -3  246.37   14.75
  -7   2   3  233.17   17.12
  -7   2   3  237.40    8.34
   7  -2   3  241.89   15.65
  -2  -7   3  212.84   14.34
   2   7   3  241.31   16.09
   3   7  -3  368.20   18.79
  -3  -7  -3  375.18   14.65
  -7   3  -3  382.26   14.10
   7  -3  -3  396.15   19.63
   3   7  -3  380.03   17.19
   3   7  -3  378.40   11.77
   3   7   3  354.24   19.06
  -3  -7   3  374.53   18.56
  -7   3   3  390.85   21.77
   7  -3   3  367.14   19.16
  -7   4  -3   92.05    7.57
   4   7  -3   84.06   11.03
   4   7  -3   99.77    9.95
   7  -4  -3   93.20   11.34
  -4  -7  -3  102.97    8.75
   4   7  -3   96.38    4.97
   7  -4   3   93.80   11.34
   4   7   3  106.99   12.48
  -4  -7   3  102.28   11.47
  -7   4   3  119.55   14.95
   5   7  -3  932.46   33.48
   5   7  -3  920.25   28.10
  -5  -7  -3  891.71   26.28
  -7   5  -3  955.81   27.39
   7  -5  -3  951.22   33.31
   7  -5   3  924.73   33.09
  -5  -7   3  981.48   32.34
  -7   5   3  790.47   33.60
   5   7   3  960.72   33.57
   6   7  -3   35.45    9.28
   6   7  -3   32.07    6.65
  -6  -7  -3   34.84    6.48
  -7   6  -3   33.88    6.23
   7  -6  -3    9.87    6.82
   6   7   3   25.99    7.69
  -6  -7   3   28.77    7.22
  -7   6   3   40.68   10.37
   7  -6   3   26.68    7.55
  -7  -7  -3  254.20   12.45
   7  -7  -3  299.05   18.01
  -7   7  -3  267.51   13.89
   7   7  -3  230.42   17.46
   7  -7   3  260.07   16.46
  -7  -7   3  235.61   15.19
   7   7   3  282.34   17.38
  -7   7   3  262.21   19.56
  -7   8  -3   60.56    8.31
   7  -8  -3   45.61   10.23
   8   7  -3   49.89    4.09
   8   7  -3   54.91   11.71
  -8  -7  -3   54.01    7.22
   8   7   3   49.13    9.54
  -8  -7   3   31.95    7.47
  -7   8   3   44.24   10.90
   7  -8   3   39.99    9.41
  -8  -6  -3 1275.90   35.16
   6  -8  -3 1248.31   29.78
  -6   8  -3 1240.01   37.29
   8   6  -3 1253.45   31.29
   8   6  -3 1195.78   42.56
   6  -8  -3 1290.03   42.09
  -8  -6   3 1264.41   39.50
  -6   8   3 1296.68   44.97
   6  -8   3 1242.41   40.63
   8   6   3 1296.81   40.94
  -8  -5  -3  100.69   10.46
  -5   8  -3  108.85   13.45
   8   5  -3  109.65    7.68
   5  -8  -3  109.31    6.57
   5  -8  -3  126.10   13.58
   8   5  -3  122.64   14.44
  -5   8  -3  124.03   11.62
   8   5   3  107.33   11.88
  -5   8   3  109.08   14.91
  -8  -5   3  102.56   11.20
   5  -8   3  126.83   12.91
  -4   8  -3 2216.86   59.89
   4  -8  -3 2205.08   60.48
   4  -8  -3 2192.35   51.65
   8   4  -3 2149.81   62.20
  -4   8  -3 2285.50   57.76
   8   4  -3 2100.08   53.05
  -8  -4  -3 2168.70   55.80
  -4   8   3 2262.70   64.30
   4  -8   3 2199.47   60.83
  -8  -4   3 2166.37   57.40
   4  -8   3 2217.91   59.00
   8   4   3 2255.62   58.80
  -3   8  -3   71.95   10.89
   3  -8  -3   64.49   10.57
   8   3  -3   55.86   10.18
   3  -8  -3   57.55    6.29
   8   3  -3   86.58    8.55
  -3   8  -3   62.60    9.08
  -8  -3  -3   68.55    9.55
   8   3   3   58.69    8.45
  -8  -3   3   61.45    8.04
   3  -8   3   61.58    9.75
  -3   8   3   56.29   11.24
   3  -8   3   69.67    9.16
   8   2  -3  204.12   16.58
   2  -8  -3  226.69   11.17
   8   2  -3  218.07   12.62
  -2   8  -3  230.44   15.35
  -2   8  -3  200.60   13.66
   2  -8  -3  219.82   14.88
  -8  -2  -3  228.80   14.57
  -2   8   3  215.87   16.83
  -8  -2   3  239.51   12.41
   2  -8   3  251.83   13.70
   8   2   3  233.52   12.74
   2  -8   3  220.53   14.68
  -1   8  -3   54.77    9.54
   1  -8  -3   66.40    9.89
  -8  -1  -3   49.49    9.17
  -1   8  -3   56.53    9.16
   1  -8  -3   58.38    7.13
   8   1  -3   64.05    8.80
   8   1  -3   45.13    9.63
   1  -8   3   54.71    9.10
  -8  -1   3   51.45    6.83
   1  -8   3   60.19    7.95
  -1   8   3   30.02    8.65
   8   1   3   63.90    7.73
   0   8  -3   16.07    7.19
   0   8  -3   18.13    7.02
  -8   0  -3   29.85    8.86
   0  -8  -3   18.32    6.89
   8   0  -3    6.03    6.74
   8   0  -3   12.54    6.38
   0   8   3    9.39    7.28
   8   0   3   24.48    7.81
   0  -8   3   24.05    5.50
   0  -8   3   20.16    6.55
  -8   0   3   23.81    4.66
   8   0   3   17.04    4.94
   1   8  -3  307.15   15.62
   8  -1  -3  274.00   19.09
   1   8  -3  316.56   17.34
  -1  -8  -3  313.54   16.44
   8  -1  -3  292.01   16.43
  -8   1   3  295.81   11.21
  -1  -8   3  279.82   16.22
   8  -1   3  303.04   17.32
   1   8   3  308.64   18.85
   8  -1   3  302.87   13.77
   8  -2  -3  664.83   25.58
   2   8  -3  622.05   22.58
  -2  -8  -3  641.99   23.53
  -8   2  -3  670.86   21.70
   2   8  -3  674.53   26.14
  -8   2   3  661.44   29.17
   2   8   3  625.76   26.51
   8  -2   3  636.35   25.92
  -8   2   3  664.23   17.55
  -2  -8   3  586.07   24.65
  -8   3  -3   80.97    8.19
   8  -3  -3   92.37   12.20
   3   8  -3   88.92    5.58
   3   8  -3  103.83   12.31
   3   8  -3   95.07   10.15
   8  -3   3   88.23   11.71
  -8   3   3  114.73   14.68
   3   8   3   95.81   12.27
  -3  -8   3   84.22   10.72
  -8   3   3   81.67    4.06
   8  -4  -3 1153.50   37.53
  -4  -8  -3 1156.23   30.21
  -8   4  -3 1202.26   32.33
   4   8  -3 1142.13   38.32
   4   8  -3 1139.75   32.73
   8  -4   3 1172.40   38.41
   4   8   3 1060.47   37.54
  -8   4   3  986.80   39.10
  -4  -8   3 1143.46   37.40
  -5  -8  -3  342.15   13.06
   8  -5  -3  363.94   19.45
   5   8  -3  323.04   14.68
  -8   5  -3  318.13   14.46
   5   8  -3  354.54   20.34
[truncated: 934,088 more chars]
