# Supplementary material
Source: MDPI journal article supplement (https://www.mdpi.com/2304-6740/6/3/66)
Supplement: s1 [file s1 › ata649cfinal.cif]

data_ata649c
_audit_creation_date               2018-06-05
_audit_creation_method
;
Olex2 1.2
(compiled 2018.05.29 svn.r3508 for OlexSys, GUI svn.r5506)
;
# start Validation Reply Form
_vrf_PLAT234_ata649c
;
PROBLEM: Large Hirshfeld Difference C39      --C40              0.39 Ang.  
RESPONSE: The n-Bu~4~N cation is disordered over several positions, 
which cannot be modelled satisfactorily. Therefore, only the main 
component was refined without any disorder.
;
_vrf_PLAT307_ata649c
;
PROBLEM: Isolated Metal Atom found in Structure (Unusual)       Mn1A Check 
RESPONSE: The metallacrowns are disordered over two position, 
with a free refined ratio of 0.91 to 0.09. 
Due to the low side occupation factor of the second position, 
only the manganese atoms were refined over two postions.
;
_vrf_PLAT413_ata649c
;
PROBLEM: Short Inter XH3 .. XHn     H28A     ..H32B             1.83 Ang.  
RESPONSE: The n-Bu~4~N cation is disordered over several positions, 
which cannot be modelled satisfactorily. Therefore, only the main 
component was refined without any disorder.
;
# end Validation Reply Form
_shelx_SHELXL_version_number       '2016/6'
_audit_contact_author_address      ?
_audit_contact_author_email        ?
_audit_contact_author_name         ''
_audit_contact_author_phone        ?
_publ_contact_author_id_orcid      ?
_publ_section_references
;
Dolomanov, O.V., Bourhis, L.J., Gildea, R.J, Howard, J.A.K. & Puschmann, H.
 (2009), J. Appl. Cryst. 42, 339-341.

Sheldrick, G.M. (2015). Acta Cryst. A71, 3-8.

Sheldrick, G.M. (2015). Acta Cryst. C71, 3-8.
;
_chemical_name_common              ?
_chemical_name_systematic          ?
_chemical_formula_moiety          
 'C48 H52 Mn3.64 N4 O20 Y, 0.36(Mn1), 0.5(Cl2 O8), 2(C16 H36 N)'
_chemical_formula_sum              'C80 H124 Cl Mn4 N6 O24 Y'
_chemical_formula_weight           1897.96
_chemical_absolute_configuration   ?
_chemical_melting_point            ?
loop_
  _atom_type_symbol
  _atom_type_description
  _atom_type_scat_dispersion_real
  _atom_type_scat_dispersion_imag
  _atom_type_scat_source
 'C' 'C' 0.0033 0.0016 'International Tables Vol C Tables 4.2.6.8 and 6.1.1.4'
 'H' 'H' 0.0000 0.0000 'International Tables Vol C Tables 4.2.6.8 and 6.1.1.4'
 'Cl' 'Cl' 0.1484 0.1585 'International Tables Vol C Tables 4.2.6.8 and 6.1.1.4'
 'Mn' 'Mn' 0.3368 0.7283 'International Tables Vol C Tables 4.2.6.8 and 6.1.1.4'
 'N' 'N' 0.0061 0.0033 'International Tables Vol C Tables 4.2.6.8 and 6.1.1.4'
 'O' 'O' 0.0106 0.0060 'International Tables Vol C Tables 4.2.6.8 and 6.1.1.4'
 'Y' 'Y' -2.7962 3.5667 'International Tables Vol C Tables 4.2.6.8 and 6.1.1.4'

_shelx_space_group_comment
;
The symmetry employed for this shelxl refinement is uniquely defined
by the following loop, which should always be used as a source of
symmetry information in preference to the above space-group names.
They are only intended as comments.
;
_space_group_crystal_system        'tetragonal'
_space_group_IT_number             103
_space_group_name_H-M_alt          'P 4 c c'
_space_group_name_Hall             'P 4 -2c'
loop_
  _space_group_symop_operation_xyz
 'x, y, z'
 '-x, -y, z'
 '-y, x, z'
 'y, -x, z'
 'x, -y, z+1/2'
 '-x, y, z+1/2'
 '-y, -x, z+1/2'
 'y, x, z+1/2'

_cell_length_a                     21.8159(6)
_cell_length_b                     21.8159
_cell_length_c                     18.6491(7)
_cell_angle_alpha                  90
_cell_angle_beta                   90
_cell_angle_gamma                  90
_cell_volume                       8875.7(6)
_cell_formula_units_Z              4
_cell_measurement_reflns_used      10893
_cell_measurement_temperature      120(2)
_cell_measurement_theta_max        28.54
_cell_measurement_theta_min        2.36
_shelx_estimated_absorpt_T_max     ?
_shelx_estimated_absorpt_T_min     ?
_exptl_absorpt_coefficient_mu      1.305
_exptl_absorpt_correction_T_max    0.8572
_exptl_absorpt_correction_T_min    0.7592
_exptl_absorpt_correction_type     integration
_exptl_absorpt_process_details     ?
_exptl_absorpt_special_details     ?
_exptl_crystal_colour              brown
_exptl_crystal_colour_primary      brown
_exptl_crystal_density_diffrn      1.420
_exptl_crystal_density_meas        ?
_exptl_crystal_density_method      ?
_exptl_crystal_description         block
_exptl_crystal_F_000               3976
loop_
  _exptl_crystal_face_index_h
  _exptl_crystal_face_index_k
  _exptl_crystal_face_index_l
  _exptl_crystal_face_perp_dist
 0 0 1 0.0450
 0 0 -1 0.0450
 1 0 0 0.1005
 -1 0 0 0.1005
 0 1 0 0.1075
 0 -1 0 0.1075

_exptl_crystal_size_max            0.21
_exptl_crystal_size_mid            0.167
_exptl_crystal_size_min            0.09
_exptl_transmission_factor_max     ?
_exptl_transmission_factor_min     ?
_diffrn_reflns_av_R_equivalents    0.0677
_diffrn_reflns_av_unetI/netI       0.0631
_diffrn_reflns_Laue_measured_fraction_full  0.998
_diffrn_reflns_Laue_measured_fraction_max  0.998
_diffrn_reflns_limit_h_max         26
_diffrn_reflns_limit_h_min         -23
_diffrn_reflns_limit_k_max         7
_diffrn_reflns_limit_k_min         -24
_diffrn_reflns_limit_l_max         20
_diffrn_reflns_limit_l_min         -23
_diffrn_reflns_number              15234
_diffrn_reflns_point_group_measured_fraction_full  0.957
_diffrn_reflns_point_group_measured_fraction_max  0.955
_diffrn_reflns_theta_full          25.242
_diffrn_reflns_theta_max           25.996
_diffrn_reflns_theta_min           2.356
_diffrn_ambient_temperature        120(2)
_diffrn_detector_area_resol_mean   6.67
_diffrn_detector_type              STOE
_diffrn_measured_fraction_theta_full  0.998
_diffrn_measured_fraction_theta_max  0.998
_diffrn_measurement_details
;
 54 frames, detector distance = 70 mm
;
_diffrn_measurement_device         '2-circle goniometer'
_diffrn_measurement_device_type    'Bruker P4'
_diffrn_measurement_method         '\w scans'
_diffrn_radiation_monochromator    'graphite'
_diffrn_radiation_type             MoK\a
_diffrn_radiation_wavelength       0.71073
_diffrn_source                     ?
_reflns_Friedel_coverage           0.849
_reflns_Friedel_fraction_full      0.913
_reflns_Friedel_fraction_max       0.909
_reflns_number_gt                  6181
_reflns_number_total               8346
_reflns_special_details
;
 Reflections were merged by SHELXL according to the crystal
 class for the calculation of statistics and refinement.
 
 _reflns_Friedel_fraction is defined as the number of unique
 Friedel pairs measured divided by the number that would be
 possible theoretically, ignoring centric projections and
 systematic absences.
;
_reflns_threshold_expression       'I > 2\s(I)'
_computing_cell_refinement         'STOE X-AREA'
_computing_data_collection         'STOE X-AREA'
_computing_data_reduction          'STOE X-RED'
_computing_molecular_graphics      'Olex2 (Dolomanov et al., 2009)'
_computing_publication_material    'Olex2 (Dolomanov et al., 2009)'
_computing_structure_refinement    'ShelXL (Sheldrick, 2015)'
_computing_structure_solution      'ShelXT (Sheldrick, 2015)'
_refine_diff_density_max           0.751
_refine_diff_density_min           -0.374
_refine_diff_density_rms           0.100
_refine_ls_abs_structure_details
;
 Flack x determined using 2076 quotients [(I+)-(I-)]/[(I+)+(I-)]
 (Parsons, Flack and Wagner, Acta Cryst. B69 (2013) 249-259).
;
_refine_ls_abs_structure_Flack     -0.009(10)
_refine_ls_extinction_coef         .
_refine_ls_extinction_method       none
_refine_ls_goodness_of_fit_ref     1.072
_refine_ls_hydrogen_treatment      constr
_refine_ls_matrix_type             full
_refine_ls_number_parameters       571
_refine_ls_number_reflns           8346
_refine_ls_number_restraints       159
_refine_ls_R_factor_all            0.1110
_refine_ls_R_factor_gt             0.0762
_refine_ls_restrained_S_all        1.087
_refine_ls_shift/su_max            0.001
_refine_ls_shift/su_mean           0.000
_refine_ls_structure_factor_coef   Fsqd
_refine_ls_weighting_details      
 'w=1/[\s^2^(Fo^2^)+(0.0815P)^2^+32.8717P] where P=(Fo^2^+2Fc^2^)/3'
_refine_ls_weighting_scheme        calc
_refine_ls_wR_factor_gt            0.1752
_refine_ls_wR_factor_ref           0.1983
_refine_special_details            ?
_olex2_refinement_description
;
1. Fixed Uiso
 At 1.2 times of:
  All C(H) groups, All C(H,H) groups
 At 1.5 times of:
  All C(H,H,H) groups
2. Restrained distances
 C39-C40
 1.52 with sigma of 0.02
 N3-C25 \\sim N3-C29 \\sim N3-C33 \\sim N3-C37
 with sigma of 0.02
 C25-C26 \\sim C26-C27 \\sim C29-C30 \\sim C30-C31 \\sim C33-C34 \\sim C34-C35
\\sim C37-C38 \\sim C38-C39
 with sigma of 0.02
 Cl1-O11 \\sim Cl1-O12 \\sim Cl1-O13 \\sim Cl1-O14
 with sigma of 0.02
 O11-O12 \\sim O11-O13 \\sim O11-O14 \\sim O12-O13 \\sim O12-O14 \\sim O13-O14
 with sigma of 0.02
 C35-C36 \\sim C27-C28 \\sim C39-C40 \\sim C31-C32
 with sigma of 0.02
3. Uiso/Uaniso restraints and constraints
Uanis(O13) \\sim Ueq, Uanis(O12) \\sim Ueq, Uanis(O11) \\sim Ueq, Uanis(O14)
\\sim Ueq: with sigma of 0.01 and sigma for terminal atoms of 0.02
Uanis(C25) \\sim Ueq, Uanis(C26) \\sim Ueq, Uanis(C27) \\sim Ueq, Uanis(C28)
\\sim Ueq: with sigma of 0.01 and sigma for terminal atoms of 0.02
Uanis(C40) \\sim Ueq, Uanis(C39) \\sim Ueq, Uanis(C38) \\sim Ueq, Uanis(C37)
\\sim Ueq, Uanis(C29) \\sim Ueq, Uanis(C30) \\sim Ueq, Uanis(C31) \\sim Ueq,
Uanis(C32) \\sim Ueq: with sigma of 0.01 and sigma for terminal atoms of 0.02
4. Others
 Sof(Mn1A)=Sof(Mn2A)=1-FVAR(1)
 Sof(Mn1)=Sof(Mn2)=FVAR(1)
 Fixed Sof: O12(0.5) O11(0.5) O13(0.5) O14(0.5)
5.a Secondary CH2 refined with riding coordinates:
 C25(H25A,H25B), C26(H26A,H26B), C27(H27A,H27B), C29(H29A,H29B), C30(H30A,
 H30B), C31(H31A,H31B), C33(H33A,H33B), C34(H34A,H34B), C35(H35A,H35B),
 C37(H37A,H37B), C38(H38A,H38B), C39(H39A,H39B)
5.b Me refined with riding coordinates:
 C40(H40A,H40B,H40C)
5.c Aromatic/amide H refined with riding coordinates:
 C2(H2), C3(H3), C4(H4), C5(H5), C14(H14), C15(H15), C16(H16), C17(H17)
5.d Idealised Me refined as rotating group:
 C10(H10A,H10B,H10C), C11(H11A,H11B,H11C), C12(H12A,H12B,H12C), C22(H22A,H22B,
 H22C), C23(H23A,H23B,H23C), C24(H24A,H24B,H24C), C28(H28A,H28B,H28C), C32(H32A,
 H32B,H32C), C36(H36A,H36B,H36C)
;
_atom_sites_solution_hydrogens     geom
_atom_sites_solution_primary       dual
_atom_sites_solution_secondary     ?
loop_
  _atom_site_label
  _atom_site_type_symbol
  _atom_site_fract_x
  _atom_site_fract_y
  _atom_site_fract_z
  _atom_site_U_iso_or_equiv
  _atom_site_adp_type
  _atom_site_occupancy
  _atom_site_site_symmetry_order
  _atom_site_calc_flag
  _atom_site_refinement_flags_posn
  _atom_site_refinement_flags_adp
  _atom_site_refinement_flags_occupancy
  _atom_site_disorder_assembly
  _atom_site_disorder_group
 Y1 Y 0.500000 0.500000 0.49016(11) 0.0267(4) Uani 1 4 d S T P . .
 Mn1 Mn 0.52308(8) 0.35144(7) 0.58369(11) 0.0319(4) Uani 0.909(4) 1 d . . . A 1
 Mn2 Mn 0.87907(9) 0.08945(9) 0.44537(12) 0.0358(5) Uani 0.909(4) 1 d . . . A 1
 Mn1A Mn 0.3732(7) 0.4207(8) 0.5893(10) 0.027(5) Uani 0.091(4) 1 d . . . A 2
 Mn2A Mn 0.9188(6) 0.1255(6) 0.4528(10) 0.018(4) Uani 0.091(4) 1 d . . . A 2
 O1 O 0.4945(4) 0.2772(4) 0.6154(5) 0.053(2) Uani 1 1 d . . . A 1
 O2 O 0.3399(4) 0.3930(4) 0.6207(5) 0.046(2) Uani 1 1 d . . . A 1
 O3 O 0.4322(3) 0.4469(3) 0.5704(4) 0.0360(18) Uani 1 1 d . . . A 1
 O4 O 0.4984(4) 0.4075(4) 0.4327(4) 0.0431(19) Uani 1 1 d . . . A 1
 O5 O 0.5394(4) 0.3232(4) 0.4802(5) 0.050(2) Uani 1 1 d . . . A 1
 N1 N 0.4408(4) 0.3837(4) 0.5894(5) 0.033(2) Uani 1 1 d . . . A 1
 C1 C 0.4391(6) 0.2594(6) 0.6389(6) 0.044(3) Uani 1 1 d . . . A 1
 C2 C 0.4315(7) 0.1992(6) 0.6602(7) 0.056(4) Uani 1 1 d . . . A 1
 H2 H 0.465400 0.171954 0.657270 0.067 Uiso 1 1 calc R . . A 1
 C3 C 0.3772(8) 0.1780(6) 0.6851(7) 0.057(4) Uani 1 1 d . . . A 1
 H3 H 0.373965 0.136031 0.698016 0.068 Uiso 1 1 calc R . . A 1
 C4 C 0.3277(8) 0.2142(8) 0.6921(9) 0.065(4) Uani 1 1 d . . . A 1
 H4 H 0.290844 0.198908 0.712463 0.077 Uiso 1 1 calc R . . A 1
 C5 C 0.3316(6) 0.2740(7) 0.6691(7) 0.053(3) Uani 1 1 d . . . A 1
 H5 H 0.296920 0.300143 0.672253 0.063 Uiso 1 1 calc R . . A 1
 C6 C 0.3880(7) 0.2968(6) 0.6404(6) 0.046(3) Uani 1 1 d . . . A 1
 C7 C 0.3901(6) 0.3600(5) 0.6161(6) 0.038(3) Uani 1 1 d . . . A 1
 C8 C 0.5268(6) 0.3573(5) 0.4276(6) 0.040(3) Uani 1 1 d . . . A 1
 C9 C 0.5511(7) 0.3370(6) 0.3549(7) 0.051(3) Uani 1 1 d . . . A 1
 C10 C 0.5415(12) 0.2712(8) 0.3447(10) 0.105(8) Uani 1 1 d . . . A 1
 H10A H 0.557348 0.248861 0.386350 0.157 Uiso 1 1 calc GR . . A 1
 H10B H 0.563157 0.257677 0.301430 0.157 Uiso 1 1 calc GR . . A 1
 H10C H 0.497582 0.262937 0.339397 0.157 Uiso 1 1 calc GR . . A 1
 C11 C 0.6204(9) 0.3472(10) 0.3546(10) 0.089(7) Uani 1 1 d . . . A 1
 H11A H 0.629030 0.391254 0.356131 0.134 Uiso 1 1 calc GR . . A 1
 H11B H 0.637999 0.329561 0.310905 0.134 Uiso 1 1 calc GR . . A 1
 H11C H 0.638595 0.327313 0.396674 0.134 Uiso 1 1 calc GR . . A 1
 C12 C 0.5254(8) 0.3750(7) 0.2940(8) 0.068(4) Uani 1 1 d . . . A 1
 H12A H 0.481230 0.367446 0.289741 0.101 Uiso 1 1 calc GR . . A 1
 H12B H 0.545731 0.363586 0.249118 0.101 Uiso 1 1 calc GR . . A 1
 H12C H 0.532461 0.418561 0.303772 0.101 Uiso 1 1 calc GR . . A 1
 Y2 Y 1.000000 0.000000 0.54173(11) 0.0325(5) Uani 1 4 d S T P A 1
 O6 O 0.8040(4) 0.0983(4) 0.4044(6) 0.057(2) Uani 1 1 d . . . A 1
 O7 O 0.8323(5) -0.0932(4) 0.4105(5) 0.056(2) Uani 1 1 d . . . A 1
 O8 O 0.9205(4) -0.0360(4) 0.4624(5) 0.042(2) Uani 1 1 d . . . A 1
 O9 O 0.9172(4) 0.0408(4) 0.5976(5) 0.053(2) Uani 1 1 d . . . A 1
 O10 O 0.8553(4) 0.1109(5) 0.5508(5) 0.059(3) Uani 1 1 d . . . A 1
 N2 N 0.8704(4) 0.0009(4) 0.4383(5) 0.0349(19) Uani 1 1 d . . . A 1
 C13 C 0.7632(6) 0.0571(6) 0.3747(8) 0.052(3) Uani 1 1 d . . . A 1
 C14 C 0.7119(6) 0.0805(7) 0.3413(7) 0.050(3) Uani 1 1 d . . . A 1
 H14 H 0.706183 0.123554 0.338022 0.060 Uiso 1 1 calc R . . A 1
 C15 C 0.6688(7) 0.0408(7) 0.3124(8) 0.053(3) Uani 1 1 d . . . A 1
 H15 H 0.633615 0.057029 0.289180 0.064 Uiso 1 1 calc R . . A 1
 C16 C 0.6760(7) -0.0208(7) 0.3170(8) 0.058(4) Uani 1 1 d . . . A 1
 H16 H 0.644900 -0.047204 0.299149 0.070 Uiso 1 1 calc R . . A 1
 C17 C 0.7276(7) -0.0452(7) 0.3468(8) 0.055(4) Uani 1 1 d . . . A 1
 H17 H 0.734028 -0.088297 0.347466 0.066 Uiso 1 1 calc R . . A 1
 C18 C 0.7719(5) -0.0041(7) 0.3774(6) 0.046(3) Uani 1 1 d . . . A 1
 C19 C 0.8269(6) -0.0340(6) 0.4108(7) 0.041(3) Uani 1 1 d . . . A 1
 C20 C 0.8823(6) 0.0865(7) 0.6029(8) 0.054(4) Uani 1 1 d . . . A 1
 C21 C 0.8720(8) 0.1133(10) 0.6770(9) 0.080(6) Uani 1 1 d . . . A 1
 C22 C 0.9004(9) 0.0797(9) 0.7388(9) 0.081(5) Uani 1 1 d . . . A 1
 H22A H 0.884865 0.037569 0.739991 0.122 Uiso 1 1 calc GR . . A 1
 H22B H 0.889826 0.100525 0.783653 0.122 Uiso 1 1 calc GR . . A 1
 H22C H 0.945038 0.079099 0.733017 0.122 Uiso 1 1 calc GR . . A 1
 C23 C 0.9153(17) 0.1767(12) 0.6719(15) 0.156(14) Uani 1 1 d . . . A 1
 H23A H 0.889810 0.211430 0.657053 0.234 Uiso 1 1 calc GR . . A 1
 H23B H 0.948084 0.170425 0.636657 0.234 Uiso 1 1 calc GR . . A 1
 H23C H 0.933405 0.185279 0.718919 0.234 Uiso 1 1 calc GR . . A 1
 C24 C 0.8106(12) 0.1397(15) 0.6880(15) 0.147(12) Uani 1 1 d . . . A 1
 H24A H 0.779675 0.107203 0.684266 0.220 Uiso 1 1 calc GR . . A 1
 H24B H 0.802735 0.170922 0.651401 0.220 Uiso 1 1 calc GR . . A 1
 H24C H 0.808430 0.158405 0.735692 0.220 Uiso 1 1 calc GR . . A 1
 Cl1 Cl 0.500000 0.000000 0.1948(3) 0.0529(11) Uani 1 2 d DS T P . .
 N3 N 0.6306(6) 0.1265(5) 0.5523(6) 0.064(3) Uani 1 1 d D . . . .
 C25 C 0.6400(8) 0.0606(6) 0.5768(10) 0.073(4) Uani 1 1 d D U . . .
 H25A H 0.666965 0.061608 0.619473 0.087 Uiso 1 1 calc R . . . .
 H25B H 0.599753 0.044762 0.592751 0.087 Uiso 1 1 calc R . . . .
 C26 C 0.6664(11) 0.0150(8) 0.5254(12) 0.112(7) Uani 1 1 d D U . . .
 H26A H 0.707240 0.029105 0.509278 0.134 Uiso 1 1 calc R . . . .
 H26B H 0.639522 0.011773 0.482790 0.134 Uiso 1 1 calc R . . . .
 C27 C 0.6722(11) -0.0479(8) 0.5612(11) 0.103(7) Uani 1 1 d D U . . .
 H27A H 0.695418 -0.042437 0.606400 0.123 Uiso 1 1 calc R . . . .
 H27B H 0.630538 -0.061804 0.574378 0.123 Uiso 1 1 calc R . . . .
 C28 C 0.7001(18) -0.0945(15) 0.523(2) 0.214(17) Uani 1 1 d D U . . .
 H28A H 0.669412 -0.115270 0.492835 0.322 Uiso 1 1 calc GR . . . .
 H28B H 0.718465 -0.124085 0.555801 0.322 Uiso 1 1 calc GR . . . .
 H28C H 0.732101 -0.077187 0.491773 0.322 Uiso 1 1 calc GR . . . .
 C29 C 0.6902(8) 0.1537(7) 0.5316(10) 0.075(5) Uani 1 1 d D U . . .
 H29A H 0.706906 0.129937 0.490842 0.090 Uiso 1 1 calc R . . . .
 H29B H 0.718962 0.148701 0.572312 0.090 Uiso 1 1 calc R . . . .
 C30 C 0.6893(10) 0.2202(8) 0.5109(12) 0.105(7) Uani 1 1 d D U . . .
 H30A H 0.675913 0.245125 0.552389 0.126 Uiso 1 1 calc R . . . .
 H30B H 0.659440 0.226442 0.471552 0.126 Uiso 1 1 calc R . . . .
 C31 C 0.7525(11) 0.2412(10) 0.4866(14) 0.118(7) Uani 1 1 d D U . . .
 H31A H 0.782202 0.222642 0.520352 0.142 Uiso 1 1 calc R . . . .
 H31B H 0.759835 0.221640 0.439473 0.142 Uiso 1 1 calc R . . . .
 C32 C 0.7699(15) 0.3029(12) 0.4790(16) 0.161(12) Uani 1 1 d D U . . .
 H32A H 0.740307 0.324041 0.448151 0.242 Uiso 1 1 calc GR . . . .
 H32B H 0.810727 0.305020 0.457241 0.242 Uiso 1 1 calc GR . . . .
 H32C H 0.770741 0.322516 0.526211 0.242 Uiso 1 1 calc GR . . . .
 C33 C 0.5994(8) 0.1596(9) 0.6112(8) 0.080(5) Uani 1 1 d D . . . .
 H33A H 0.561517 0.137092 0.624024 0.096 Uiso 1 1 calc R . . . .
 H33B H 0.587103 0.200653 0.593669 0.096 Uiso 1 1 calc R . . . .
 C34 C 0.6381(8) 0.1673(8) 0.6779(8) 0.071(5) Uani 1 1 d D . . . .
 H34A H 0.676481 0.189157 0.665578 0.085 Uiso 1 1 calc R . . . .
 H34B H 0.649254 0.126453 0.697104 0.085 Uiso 1 1 calc R . . . .
 C35 C 0.6029(9) 0.2036(9) 0.7351(9) 0.089(6) Uani 1 1 d D . . . .
 H35A H 0.592399 0.244683 0.716132 0.107 Uiso 1 1 calc R . . . .
 H35B H 0.564155 0.182100 0.746694 0.107 Uiso 1 1 calc R . . . .
 C36 C 0.6389(12) 0.2101(10) 0.7989(12) 0.117(8) Uani 1 1 d D . . . .
 H36A H 0.637446 0.171889 0.826465 0.175 Uiso 1 1 calc GR . . . .
 H36B H 0.622499 0.243694 0.828032 0.175 Uiso 1 1 calc GR . . . .
 H36C H 0.681473 0.219173 0.785824 0.175 Uiso 1 1 calc GR . . . .
 C37 C 0.5862(9) 0.1277(10) 0.4887(11) 0.098(6) Uani 1 1 d D U . . .
 H37A H 0.579637 0.171318 0.476090 0.117 Uiso 1 1 calc R . . . .
 H37B H 0.607661 0.108640 0.447599 0.117 Uiso 1 1 calc R . . . .
 C38 C 0.5240(10) 0.0983(13) 0.4936(15) 0.132(9) Uani 1 1 d D U . . .
 H38A H 0.506114 0.109876 0.540461 0.159 Uiso 1 1 calc R . . B .
 H38B H 0.530233 0.053346 0.494526 0.159 Uiso 1 1 calc R . . B .
 C39 C 0.4760(16) 0.1119(19) 0.436(2) 0.191(15) Uani 1 1 d D U . C 1
 H39A H 0.440644 0.083849 0.442411 0.229 Uiso 1 1 calc R . . C 1
 H39B H 0.461002 0.154417 0.441932 0.229 Uiso 1 1 calc R . . C 1
 C40 C 0.501(3) 0.104(3) 0.365(3) 0.32(3) Uani 1 1 d D U . C 1
 H40A H 0.469670 0.113136 0.329504 0.481 Uiso 1 1 calc R . . C 1
 H40B H 0.535823 0.132372 0.358981 0.481 Uiso 1 1 calc R . . C 1
 H40C H 0.515489 0.061891 0.359460 0.481 Uiso 1 1 calc R . . C 1
 O12 O 0.5362(16) -0.0428(13) 0.2310(16) 0.143(14) Uani 0.5 1 d D U . . .
 O11 O 0.4914(12) -0.0282(9) 0.1243(11) 0.096(8) Uani 0.5 1 d D U . . .
 O13 O 0.4426(10) 0.0019(17) 0.2234(16) 0.127(12) Uani 0.5 1 d D U . . .
 O14 O 0.5288(15) 0.0534(11) 0.1854(14) 0.118(10) Uani 0.5 1 d D U . . .

loop_
  _atom_site_aniso_label
  _atom_site_aniso_U_11
  _atom_site_aniso_U_22
  _atom_site_aniso_U_33
  _atom_site_aniso_U_23
  _atom_site_aniso_U_13
  _atom_site_aniso_U_12
 Y1 0.0246(6) 0.0246(6) 0.0308(11) 0.000 0.000 0.000
 Mn1 0.0333(10) 0.0219(9) 0.0405(10) 0.0033(8) 0.0082(9) 0.0025(7)
 Mn2 0.0323(10) 0.0339(10) 0.0413(10) -0.0012(9) 0.0025(9) 0.0023(8)
 Mn1A 0.023(9) 0.031(10) 0.026(9) 0.009(8) -0.002(8) -0.011(7)
 Mn2A 0.015(8) 0.008(7) 0.031(9) 0.005(7) -0.001(7) -0.002(6)
 O1 0.054(5) 0.034(4) 0.072(6) 0.006(4) 0.018(5) 0.002(4)
 O2 0.027(4) 0.057(6) 0.053(5) -0.004(4) 0.001(4) -0.005(4)
 O3 0.031(4) 0.029(4) 0.049(5) 0.003(3) 0.005(3) 0.000(3)
 O4 0.046(5) 0.038(4) 0.045(5) -0.011(4) 0.001(4) 0.002(4)
 O5 0.066(6) 0.035(4) 0.049(5) -0.004(4) 0.012(4) 0.008(4)
 N1 0.043(5) 0.022(4) 0.034(5) 0.003(4) 0.003(5) -0.007(4)
 C1 0.059(8) 0.046(7) 0.028(6) -0.007(5) 0.012(6) -0.016(6)
 C2 0.076(10) 0.035(7) 0.057(9) -0.001(6) 0.010(7) 0.005(7)
 C3 0.092(12) 0.027(7) 0.052(8) 0.004(6) 0.006(8) -0.026(7)
 C4 0.059(10) 0.065(10) 0.070(10) -0.002(8) -0.002(8) -0.027(8)
 C5 0.046(8) 0.053(8) 0.059(9) 0.009(6) -0.002(6) -0.004(6)
 C6 0.068(9) 0.039(7) 0.031(6) 0.005(5) 0.004(6) -0.026(6)
 C7 0.042(7) 0.039(6) 0.034(6) -0.003(5) 0.000(5) -0.007(5)
 C8 0.044(7) 0.033(6) 0.041(7) 0.000(5) 0.000(5) -0.007(5)
 C9 0.066(9) 0.042(7) 0.045(8) -0.010(6) 0.000(7) 0.004(6)
 C10 0.19(2) 0.067(12) 0.054(10) -0.020(9) 0.002(13) 0.024(14)
 C11 0.083(13) 0.124(18) 0.062(11) 0.004(11) 0.010(9) 0.047(12)
 C12 0.086(11) 0.068(10) 0.049(9) -0.011(8) 0.005(8) 0.020(9)
 Y2 0.0337(7) 0.0337(7) 0.0299(11) 0.000 0.000 0.000
 O6 0.055(6) 0.037(5) 0.077(7) 0.005(5) -0.009(5) 0.008(4)
 O7 0.065(6) 0.038(5) 0.064(6) -0.009(4) 0.002(5) -0.001(5)
 O8 0.035(4) 0.040(5) 0.050(5) 0.006(4) 0.001(4) -0.001(4)
 O9 0.057(6) 0.057(6) 0.045(6) -0.004(4) 0.009(4) 0.005(5)
 O10 0.055(6) 0.070(6) 0.052(6) -0.007(5) 0.001(5) 0.025(5)
 N2 0.030(5) 0.035(5) 0.040(5) 0.003(5) 0.002(4) 0.000(4)
 C13 0.047(8) 0.049(8) 0.059(9) 0.012(6) 0.014(7) 0.000(6)
 C14 0.042(7) 0.056(9) 0.052(8) 0.011(6) 0.001(6) 0.003(6)
 C15 0.047(8) 0.064(9) 0.049(8) -0.001(7) -0.006(6) 0.005(7)
 C16 0.057(9) 0.052(9) 0.065(9) -0.007(7) -0.015(7) 0.009(7)
 C17 0.049(8) 0.054(9) 0.063(9) -0.005(7) -0.014(7) 0.012(7)
 C18 0.031(6) 0.074(9) 0.034(6) 0.001(6) -0.001(5) 0.012(7)
 C19 0.043(7) 0.039(7) 0.040(7) -0.005(5) 0.007(5) -0.001(5)
 C20 0.046(7) 0.064(9) 0.053(9) -0.008(7) 0.008(6) 0.014(7)
 C21 0.082(13) 0.105(15) 0.053(10) -0.034(10) 0.008(9) 0.035(11)
 C22 0.102(14) 0.100(14) 0.042(8) -0.003(9) 0.011(9) 0.011(11)
 C23 0.26(4) 0.10(2) 0.105(19) -0.022(16) -0.06(2) 0.01(2)
 C24 0.13(2) 0.20(3) 0.11(2) -0.037(19) 0.019(16) 0.08(2)
 Cl1 0.0304(19) 0.051(2) 0.077(3) 0.000 0.000 -0.005(2)
 N3 0.074(9) 0.055(7) 0.062(8) 0.006(6) 0.019(7) 0.015(6)
 C25 0.077(9) 0.061(8) 0.081(9) 0.002(8) 0.014(8) 0.005(7)
 C26 0.116(12) 0.110(12) 0.110(12) -0.001(10) 0.038(10) -0.006(10)
 C27 0.123(12) 0.077(10) 0.108(12) -0.017(9) 0.037(10) 0.012(9)
 C28 0.21(3) 0.20(3) 0.23(3) 0.05(2) 0.03(2) 0.03(2)
 C29 0.088(10) 0.064(8) 0.073(9) -0.002(7) 0.017(8) -0.010(8)
 C30 0.130(12) 0.088(11) 0.097(11) -0.004(9) 0.008(10) 0.005(10)
 C31 0.134(13) 0.095(12) 0.125(12) -0.001(10) 0.010(11) -0.036(10)
 C32 0.19(2) 0.14(2) 0.15(2) 0.027(17) 0.048(18) -0.005(18)
 C33 0.097(13) 0.088(12) 0.055(9) -0.004(8) 0.010(9) 0.038(10)
 C34 0.070(11) 0.076(12) 0.067(10) -0.007(9) 0.007(8) 0.016(9)
 C35 0.091(14) 0.103(15) 0.074(12) 0.018(11) 0.006(11) 0.013(11)
 C36 0.16(2) 0.084(15) 0.102(18) 0.016(13) 0.005(17) 0.032(15)
 C37 0.106(11) 0.095(11) 0.092(11) 0.002(9) 0.009(10) -0.010(9)
 C38 0.127(13) 0.146(14) 0.124(13) -0.003(12) -0.007(11) 0.005(11)
 C39 0.190(18) 0.196(19) 0.186(18) 0.009(13) 0.002(13) -0.008(13)
 C40 0.33(4) 0.32(4) 0.32(4) 0.01(3) -0.02(3) 0.01(3)
 O12 0.150(18) 0.127(17) 0.154(18) 0.018(13) -0.021(13) 0.014(13)
 O11 0.103(13) 0.093(13) 0.092(12) -0.022(10) -0.017(11) 0.007(11)
 O13 0.100(15) 0.146(16) 0.133(16) -0.002(13) 0.017(12) -0.011(12)
 O14 0.122(15) 0.095(14) 0.136(15) -0.003(12) 0.011(12) -0.037(12)

_geom_special_details
;
 All esds (except the esd in the dihedral angle between two l.s. planes)
 are estimated using the full covariance matrix.  The cell esds are taken
 into account individually in the estimation of esds in distances, angles
 and torsion angles; correlations between esds in cell parameters are only
 used when they are defined by crystal symmetry.  An approximate (isotropic)
 treatment of cell esds is used for estimating esds involving l.s. planes.
;
loop_
  _geom_bond_atom_site_label_1
  _geom_bond_atom_site_label_2
  _geom_bond_distance
  _geom_bond_site_symmetry_2
  _geom_bond_publ_flag
 Y1 O3 2.402(8) . ?
 Y1 O3 2.402(8) 4_565 ?
 Y1 O3 2.402(8) 2_665 ?
 Y1 O3 2.402(8) 3_655 ?
 Y1 O4 2.285(8) . ?
 Y1 O4 2.285(8) 2_665 ?
 Y1 O4 2.285(8) 4_565 ?
 Y1 O4 2.285(8) 3_655 ?
 Mn1 O1 1.833(9) . ?
 Mn1 O2 1.972(10) 3_655 ?
 Mn1 O3 1.895(7) 3_655 ?
 Mn1 O5 2.057(9) . ?
 Mn1 N1 1.930(9) . ?
 Mn2 O6 1.818(10) . ?
 Mn2 O7 1.924(10) 4_665 ?
 Mn2 O8 1.891(8) 4_665 ?
 Mn2 O10 2.087(10) . ?
 Mn2 N2 1.947(10) . ?
 O1 C1 1.344(15) . ?
 O2 C7 1.314(14) . ?
 O3 N1 1.437(10) . ?
 O4 C8 1.262(14) . ?
 O5 C8 1.261(15) . ?
 N1 C7 1.318(15) . ?
 C1 C2 1.381(18) . ?
 C1 C6 1.382(19) . ?
 C2 H2 0.9500 . ?
 C2 C3 1.35(2) . ?
 C3 H3 0.9500 . ?
 C3 C4 1.35(2) . ?
 C4 H4 0.9500 . ?
 C4 C5 1.38(2) . ?
 C5 H5 0.9500 . ?
 C5 C6 1.430(18) . ?
 C6 C7 1.453(16) . ?
 C8 C9 1.521(18) . ?
 C9 C10 1.46(2) . ?
 C9 C11 1.53(2) . ?
 C9 C12 1.51(2) . ?
 C10 H10A 0.9800 . ?
 C10 H10B 0.9800 . ?
 C10 H10C 0.9800 . ?
 C11 H11A 0.9800 . ?
 C11 H11B 0.9800 . ?
 C11 H11C 0.9800 . ?
 C12 H12A 0.9800 . ?
 C12 H12B 0.9800 . ?
 C12 H12C 0.9800 . ?
 Y2 O8 2.411(8) . ?
 Y2 O8 2.411(8) 2_755 ?
 Y2 O8 2.411(8) 3_645 ?
 Y2 O8 2.411(8) 4_665 ?
 Y2 O9 2.266(9) 4_665 ?
 Y2 O9 2.267(9) . ?
 Y2 O9 2.266(9) 2_755 ?
 Y2 O9 2.266(9) 3_645 ?
 O6 C13 1.381(17) . ?
 O7 C19 1.297(15) . ?
 O8 N2 1.431(12) . ?
 O9 C20 1.259(16) . ?
 O10 C20 1.254(17) . ?
 N2 C19 1.318(15) . ?
 C13 C14 1.377(19) . ?
 C13 C18 1.348(19) . ?
 C14 H14 0.9500 . ?
 C14 C15 1.39(2) . ?
 C15 H15 0.9500 . ?
 C15 C16 1.36(2) . ?
 C16 H16 0.9500 . ?
 C16 C17 1.364(19) . ?
 C17 H17 0.9500 . ?
 C17 C18 1.44(2) . ?
 C18 C19 1.501(17) . ?
 C20 C21 1.52(2) . ?
 C21 C22 1.50(3) . ?
 C21 C23 1.68(3) . ?
 C21 C24 1.47(3) . ?
 C22 H22A 0.9800 . ?
 C22 H22B 0.9800 . ?
 C22 H22C 0.9800 . ?
 C23 H23A 0.9800 . ?
 C23 H23B 0.9800 . ?
 C23 H23C 0.9800 . ?
 C24 H24A 0.9800 . ?
 C24 H24B 0.9800 . ?
 C24 H24C 0.9800 . ?
 Cl1 O12 1.397(19) 2_655 ?
 Cl1 O12 1.397(19) . ?
 Cl1 O11 1.462(18) 2_655 ?
 Cl1 O11 1.462(18) . ?
 Cl1 O13 1.362(19) . ?
 Cl1 O13 1.362(19) 2_655 ?
 Cl1 O14 1.335(18) 2_655 ?
 Cl1 O14 1.335(18) . ?
 N3 C25 1.521(15) . ?
 N3 C29 1.480(15) . ?
 N3 C33 1.481(14) . ?
 N3 C37 1.531(17) . ?
 C25 H25A 0.9900 . ?
 C25 H25B 0.9900 . ?
 C25 C26 1.496(17) . ?
 C26 H26A 0.9900 . ?
 C26 H26B 0.9900 . ?
 C26 C27 1.532(18) . ?
 C27 H27A 0.9900 . ?
 C27 H27B 0.9900 . ?
 C27 C28 1.39(2) . ?
 C28 H28A 0.9800 . ?
 C28 H28B 0.9800 . ?
 C28 H28C 0.9800 . ?
 C29 H29A 0.9900 . ?
 C29 H29B 0.9900 . ?
 C29 C30 1.501(17) . ?
 C30 H30A 0.9900 . ?
 C30 H30B 0.9900 . ?
 C30 C31 1.523(18) . ?
 C31 H31A 0.9900 . ?
 C31 H31B 0.9900 . ?
 C31 C32 1.40(2) . ?
 C32 H32A 0.9800 . ?
 C32 H32B 0.9800 . ?
 C32 H32C 0.9800 . ?
 C33 H33A 0.9900 . ?
 C33 H33B 0.9900 . ?
 C33 C34 1.514(17) . ?
 C34 H34A 0.9900 . ?
 C34 H34B 0.9900 . ?
 C34 C35 1.537(17) . ?
 C35 H35A 0.9900 . ?
 C35 H35B 0.9900 . ?
 C35 C36 1.43(2) . ?
 C36 H36A 0.9800 . ?
 C36 H36B 0.9800 . ?
 C36 H36C 0.9800 . ?
 C37 H37A 0.9900 . ?
 C37 H37B 0.9900 . ?
 C37 C38 1.505(19) . ?
 C38 H38A 0.9900 . ?
 C38 H38B 0.9900 . ?
 C38 C39 1.53(2) . ?
 C39 H39A 0.9900 . ?
 C39 H39B 0.9900 . ?
 C39 C40 1.44(2) . ?
 C40 H40A 0.9800 . ?
 C40 H40B 0.9800 . ?
 C40 H40C 0.9800 . ?
 O12 O13 1.02(4) 2_655 ?
 O12 O14 1.67(3) 2_655 ?
 O11 O11 1.29(4) 2_655 ?
 O11 O14 1.34(4) 2_655 ?
 O13 O14 1.53(4) 2_655 ?

loop_
  _geom_angle_atom_site_label_1
  _geom_angle_atom_site_label_2
  _geom_angle_atom_site_label_3
  _geom_angle
  _geom_angle_site_symmetry_1
  _geom_angle_site_symmetry_3
  _geom_angle_publ_flag
 O3 Y1 O3 102.9(4) . 2_665 ?
 O3 Y1 O3 102.9(4) 4_565 3_655 ?
 O3 Y1 O3 67.2(2) 2_665 3_655 ?
 O3 Y1 O3 67.2(2) . 4_565 ?
 O3 Y1 O3 67.2(2) . 3_655 ?
 O3 Y1 O3 67.2(2) 2_665 4_565 ?
 O4 Y1 O3 81.8(3) . . ?
 O4 Y1 O3 146.0(3) . 4_565 ?
 O4 Y1 O3 75.8(3) . 3_655 ?
 O4 Y1 O3 75.8(3) 4_565 . ?
 O4 Y1 O3 136.6(3) 3_655 4_565 ?
 O4 Y1 O3 146.0(3) 3_655 . ?
 O4 Y1 O3 146.0(3) 2_665 3_655 ?
 O4 Y1 O3 136.6(3) 2_665 . ?
 O4 Y1 O3 81.8(3) 4_565 4_565 ?
 O4 Y1 O3 136.6(3) . 2_665 ?
 O4 Y1 O3 75.8(3) 2_665 4_565 ?
 O4 Y1 O3 146.0(3) 4_565 2_665 ?
 O4 Y1 O3 136.6(3) 4_565 3_655 ?
 O4 Y1 O3 75.8(3) 3_655 2_665 ?
 O4 Y1 O3 81.8(3) 2_665 2_665 ?
 O4 Y1 O3 81.8(3) 3_655 3_655 ?
 O4 Y1 O4 77.28(18) . 3_655 ?
 O4 Y1 O4 77.28(18) 4_565 2_665 ?
 O4 Y1 O4 124.0(4) . 2_665 ?
 O4 Y1 O4 77.28(18) 3_655 2_665 ?
 O4 Y1 O4 77.28(18) . 4_565 ?
 O4 Y1 O4 124.0(4) 4_565 3_655 ?
 O1 Mn1 O2 95.2(4) . 3_655 ?
 O1 Mn1 O3 168.7(4) . 3_655 ?
 O1 Mn1 O5 95.6(4) . . ?
 O1 Mn1 N1 89.3(4) . . ?
 O2 Mn1 O5 97.5(4) 3_655 . ?
 O3 Mn1 O2 81.0(3) 3_655 3_655 ?
 O3 Mn1 O5 95.5(4) 3_655 . ?
 O3 Mn1 N1 89.4(3) 3_655 . ?
 N1 Mn1 O2 152.9(4) . 3_655 ?
 N1 Mn1 O5 108.7(4) . . ?
 O6 Mn2 O7 92.7(4) . 4_665 ?
 O6 Mn2 O8 164.8(4) . 4_665 ?
 O6 Mn2 O10 98.6(4) . . ?
 O6 Mn2 N2 89.3(4) . . ?
 O7 Mn2 O10 101.4(4) 4_665 . ?
 O7 Mn2 N2 152.7(4) 4_665 . ?
 O8 Mn2 O7 81.4(4) 4_665 4_665 ?
 O8 Mn2 O10 96.4(4) 4_665 . ?
 O8 Mn2 N2 89.6(4) 4_665 . ?
 N2 Mn2 O10 105.2(4) . . ?
 C1 O1 Mn1 131.8(8) . . ?
 C7 O2 Mn1 112.3(7) . 4_565 ?
 Mn1 O3 Y1 119.2(3) 4_565 . ?
 N1 O3 Y1 122.4(5) . . ?
 N1 O3 Mn1 114.9(6) . 4_565 ?
 C8 O4 Y1 142.6(8) . . ?
 C8 O5 Mn1 121.1(7) . . ?
 O3 N1 Mn1 117.3(6) . . ?
 C7 N1 Mn1 131.2(8) . . ?
 C7 N1 O3 111.0(9) . . ?
 O1 C1 C2 118.4(13) . . ?
 O1 C1 C6 124.2(11) . . ?
 C2 C1 C6 117.4(12) . . ?
 C1 C2 H2 119.1 . . ?
 C3 C2 C1 121.8(14) . . ?
 C3 C2 H2 119.1 . . ?
 C2 C3 H3 118.8 . . ?
 C4 C3 C2 122.4(13) . . ?
 C4 C3 H3 118.8 . . ?
 C3 C4 H4 120.8 . . ?
 C3 C4 C5 118.4(14) . . ?
 C5 C4 H4 120.8 . . ?
 C4 C5 H5 120.0 . . ?
 C4 C5 C6 120.0(14) . . ?
 C6 C5 H5 120.0 . . ?
 C1 C6 C5 119.7(11) . . ?
 C1 C6 C7 121.9(12) . . ?
 C5 C6 C7 118.3(13) . . ?
 O2 C7 N1 120.6(10) . . ?
 O2 C7 C6 118.3(11) . . ?
 N1 C7 C6 121.1(11) . . ?
 O4 C8 C9 119.4(11) . . ?
 O5 C8 O4 124.0(11) . . ?
 O5 C8 C9 116.5(11) . . ?
 C8 C9 C11 107.8(12) . . ?
 C10 C9 C8 110.6(13) . . ?
 C10 C9 C11 106.5(16) . . ?
 C10 C9 C12 112.7(14) . . ?
 C12 C9 C8 112.3(11) . . ?
 C12 C9 C11 106.5(14) . . ?
 C9 C10 H10A 109.5 . . ?
 C9 C10 H10B 109.5 . . ?
 C9 C10 H10C 109.5 . . ?
 H10A C10 H10B 109.5 . . ?
 H10A C10 H10C 109.5 . . ?
 H10B C10 H10C 109.5 . . ?
 C9 C11 H11A 109.5 . . ?
 C9 C11 H11B 109.5 . . ?
 C9 C11 H11C 109.5 . . ?
 H11A C11 H11B 109.5 . . ?
 H11A C11 H11C 109.5 . . ?
 H11B C11 H11C 109.5 . . ?
 C9 C12 H12A 109.5 . . ?
 C9 C12 H12B 109.5 . . ?
 C9 C12 H12C 109.5 . . ?
 H12A C12 H12B 109.5 . . ?
 H12A C12 H12C 109.5 . . ?
 H12B C12 H12C 109.5 . . ?
 O8 Y2 O8 67.9(2) . 3_645 ?
 O8 Y2 O8 104.3(4) 3_645 4_665 ?
 O8 Y2 O8 67.9(2) . 4_665 ?
 O8 Y2 O8 104.3(4) . 2_755 ?
 O8 Y2 O8 67.9(2) 3_645 2_755 ?
 O8 Y2 O8 67.9(2) 2_755 4_665 ?
 O9 Y2 O8 145.5(3) . 3_645 ?
 O9 Y2 O8 80.6(3) 4_665 4_665 ?
 O9 Y2 O8 74.9(3) 2_755 3_645 ?
 O9 Y2 O8 136.6(3) 2_755 . ?
 O9 Y2 O8 136.6(3) 3_645 4_665 ?
 O9 Y2 O8 74.9(3) 4_665 2_755 ?
 O9 Y2 O8 80.6(3) . . ?
 O9 Y2 O8 80.6(3) 2_755 2_755 ?
 O9 Y2 O8 136.6(3) 4_665 3_645 ?
 O9 Y2 O8 145.5(3) 3_645 2_755 ?
 O9 Y2 O8 74.9(3) . 4_665 ?
 O9 Y2 O8 136.6(3) . 2_755 ?
 O9 Y2 O8 80.6(3) 3_645 3_645 ?
 O9 Y2 O8 74.9(3) 3_645 . ?
 O9 Y2 O8 145.5(3) 4_665 . ?
 O9 Y2 O8 145.5(3) 2_755 4_665 ?
 O9 Y2 O9 125.3(5) 4_665 3_645 ?
 O9 Y2 O9 77.8(2) 3_645 . ?
 O9 Y2 O9 125.3(5) 2_755 . ?
 O9 Y2 O9 77.8(2) 2_755 3_645 ?
 O9 Y2 O9 77.8(2) 4_665 2_755 ?
 O9 Y2 O9 77.8(2) 4_665 . ?
 C13 O6 Mn2 132.9(8) . . ?
 C19 O7 Mn2 113.2(8) . 3_645 ?
 Mn2 O8 Y2 120.3(4) 3_645 . ?
 N2 O8 Mn2 114.2(6) . 3_645 ?
 N2 O8 Y2 124.0(6) . . ?
 C20 O9 Y2 146.1(9) . . ?
 C20 O10 Mn2 121.2(8) . . ?
 O8 N2 Mn2 117.5(6) . . ?
 C19 N2 Mn2 132.0(8) . . ?
 C19 N2 O8 110.4(9) . . ?
 C14 C13 O6 117.6(13) . . ?
 C18 C13 O6 122.5(12) . . ?
 C18 C13 C14 119.9(14) . . ?
 C13 C14 H14 120.2 . . ?
 C13 C14 C15 119.6(14) . . ?
 C15 C14 H14 120.2 . . ?
 C14 C15 H15 119.5 . . ?
 C16 C15 C14 121.0(14) . . ?
 C16 C15 H15 119.5 . . ?
 C15 C16 H16 119.7 . . ?
 C15 C16 C17 120.6(15) . . ?
 C17 C16 H16 119.7 . . ?
 C16 C17 H17 120.9 . . ?
 C16 C17 C18 118.2(14) . . ?
 C18 C17 H17 120.9 . . ?
 C13 C18 C17 120.5(12) . . ?
 C13 C18 C19 124.0(12) . . ?
 C17 C18 C19 115.5(12) . . ?
 O7 C19 N2 120.6(12) . . ?
 O7 C19 C18 120.3(12) . . ?
 N2 C19 C18 119.0(11) . . ?
 O9 C20 C21 117.8(14) . . ?
 O10 C20 O9 124.0(13) . . ?
 O10 C20 C21 118.2(13) . . ?
 C20 C21 C23 100.5(16) . . ?
 C22 C21 C20 116.8(14) . . ?
 C22 C21 C23 102.3(16) . . ?
 C24 C21 C20 114.4(17) . . ?
 C24 C21 C22 117.3(18) . . ?
 C24 C21 C23 101(2) . . ?
 C21 C22 H22A 109.5 . . ?
 C21 C22 H22B 109.5 . . ?
 C21 C22 H22C 109.5 . . ?
 H22A C22 H22B 109.5 . . ?
 H22A C22 H22C 109.5 . . ?
 H22B C22 H22C 109.5 . . ?
 C21 C23 H23A 109.5 . . ?
 C21 C23 H23B 109.5 . . ?
 C21 C23 H23C 109.5 . . ?
 H23A C23 H23B 109.5 . . ?
 H23A C23 H23C 109.5 . . ?
 H23B C23 H23C 109.5 . . ?
 C21 C24 H24A 109.5 . . ?
 C21 C24 H24B 109.5 . . ?
 C21 C24 H24C 109.5 . . ?
 H24A C24 H24B 109.5 . . ?
 H24A C24 H24C 109.5 . . ?
 H24B C24 H24C 109.5 . . ?
 O12 Cl1 O12 122(3) . 2_655 ?
 O12 Cl1 O11 103.0(12) 2_655 2_655 ?
 O12 Cl1 O11 103.0(12) . . ?
 O12 Cl1 O11 130(2) . 2_655 ?
 O12 Cl1 O11 130(2) 2_655 . ?
 O11 Cl1 O11 52.2(17) 2_655 . ?
 O13 Cl1 O12 43.2(15) . 2_655 ?
 O13 Cl1 O12 110.5(13) . . ?
 O13 Cl1 O12 43.2(15) 2_655 . ?
 O13 Cl1 O12 110.5(13) 2_655 2_655 ?
 O13 Cl1 O11 117(2) . 2_655 ?
 O13 Cl1 O11 104.3(12) . . ?
 O13 Cl1 O11 117(2) 2_655 . ?
 O13 Cl1 O11 104.3(12) 2_655 2_655 ?
 O13 Cl1 O13 134(3) . 2_655 ?
 O14 Cl1 O12 75.3(14) . 2_655 ?
 O14 Cl1 O12 112.4(13) 2_655 2_655 ?
 O14 Cl1 O12 75.3(14) 2_655 . ?
 O14 Cl1 O12 112.4(13) . . ?
 O14 Cl1 O11 57.0(15) 2_655 . ?
 O14 Cl1 O11 108.0(13) 2_655 2_655 ?
 O14 Cl1 O11 57.0(15) . 2_655 ?
 O14 Cl1 O11 108.0(13) . . ?
 O14 Cl1 O13 69.2(14) 2_655 . ?
 O14 Cl1 O13 117.3(14) 2_655 2_655 ?
 O14 Cl1 O13 117.3(14) . . ?
 O14 Cl1 O13 69.2(14) . 2_655 ?
 O14 Cl1 O14 165(2) . 2_655 ?
 C25 N3 C37 109.6(13) . . ?
 C29 N3 C25 109.8(11) . . ?
 C29 N3 C33 113.7(14) . . ?
 C29 N3 C37 110.3(13) . . ?
 C33 N3 C25 107.5(12) . . ?
 C33 N3 C37 105.9(12) . . ?
 N3 C25 H25A 107.5 . . ?
 N3 C25 H25B 107.5 . . ?
 H25A C25 H25B 107.0 . . ?
 C26 C25 N3 119.2(15) . . ?
 C26 C25 H25A 107.5 . . ?
 C26 C25 H25B 107.5 . . ?
 C25 C26 H26A 109.6 . . ?
 C25 C26 H26B 109.6 . . ?
 C25 C26 C27 110.4(16) . . ?
 H26A C26 H26B 108.1 . . ?
 C27 C26 H26A 109.6 . . ?
 C27 C26 H26B 109.6 . . ?
 C26 C27 H27A 107.8 . . ?
 C26 C27 H27B 107.8 . . ?
 H27A C27 H27B 107.2 . . ?
 C28 C27 C26 118(2) . . ?
 C28 C27 H27A 107.8 . . ?
 C28 C27 H27B 107.8 . . ?
 C27 C28 H28A 109.5 . . ?
 C27 C28 H28B 109.5 . . ?
 C27 C28 H28C 109.5 . . ?
 H28A C28 H28B 109.5 . . ?
 H28A C28 H28C 109.5 . . ?
 H28B C28 H28C 109.5 . . ?
 N3 C29 H29A 108.2 . . ?
 N3 C29 H29B 108.2 . . ?
 N3 C29 C30 116.3(15) . . ?
 H29A C29 H29B 107.4 . . ?
 C30 C29 H29A 108.2 . . ?
 C30 C29 H29B 108.2 . . ?
 C29 C30 H30A 109.5 . . ?
 C29 C30 H30B 109.5 . . ?
 C29 C30 C31 110.8(17) . . ?
 H30A C30 H30B 108.1 . . ?
 C31 C30 H30A 109.5 . . ?
 C31 C30 H30B 109.5 . . ?
 C30 C31 H31A 106.3 . . ?
 C30 C31 H31B 106.3 . . ?
 H31A C31 H31B 106.4 . . ?
 C32 C31 C30 124(2) . . ?
 C32 C31 H31A 106.3 . . ?
 C32 C31 H31B 106.3 . . ?
 C31 C32 H32A 109.5 . . ?
 C31 C32 H32B 109.5 . . ?
 C31 C32 H32C 109.5 . . ?
 H32A C32 H32B 109.5 . . ?
 H32A C32 H32C 109.5 . . ?
 H32B C32 H32C 109.5 . . ?
 N3 C33 H33A 108.8 . . ?
 N3 C33 H33B 108.8 . . ?
 N3 C33 C34 113.9(13) . . ?
 H33A C33 H33B 107.7 . . ?
 C34 C33 H33A 108.8 . . ?
 C34 C33 H33B 108.8 . . ?
 C33 C34 H34A 109.6 . . ?
 C33 C34 H34B 109.6 . . ?
 C33 C34 C35 110.4(13) . . ?
 H34A C34 H34B 108.1 . . ?
 C35 C34 H34A 109.6 . . ?
 C35 C34 H34B 109.6 . . ?
 C34 C35 H35A 109.5 . . ?
 C34 C35 H35B 109.5 . . ?
 H35A C35 H35B 108.1 . . ?
 C36 C35 C34 110.7(17) . . ?
 C36 C35 H35A 109.5 . . ?
 C36 C35 H35B 109.5 . . ?
 C35 C36 H36A 109.5 . . ?
 C35 C36 H36B 109.5 . . ?
 C35 C36 H36C 109.5 . . ?
 H36A C36 H36B 109.5 . . ?
 H36A C36 H36C 109.5 . . ?
 H36B C36 H36C 109.5 . . ?
 N3 C37 H37A 107.1 . . ?
 N3 C37 H37B 107.1 . . ?
 H37A C37 H37B 106.8 . . ?
 C38 C37 N3 121.1(18) . . ?
 C38 C37 H37A 107.1 . . ?
 C38 C37 H37B 107.1 . . ?
 C37 C38 H38A 107.4 . . ?
 C37 C38 H38B 107.4 . . ?
 C37 C38 C39 120(2) . . ?
 H38A C38 H38B 106.9 . . ?
 C39 C38 H38A 107.4 . . ?
 C39 C38 H38B 107.4 . . ?
 C38 C39 H39A 109.5 . . ?
 C38 C39 H39B 109.5 . . ?
 H39A C39 H39B 108.0 . . ?
 C40 C39 C38 111(4) . . ?
 C40 C39 H39A 109.5 . . ?
 C40 C39 H39B 109.5 . . ?
 C39 C40 H40A 109.5 . . ?
 C39 C40 H40B 109.5 . . ?
 C39 C40 H40C 109.5 . . ?
 H40A C40 H40B 109.5 . . ?
 H40A C40 H40C 109.5 . . ?
 H40B C40 H40C 109.5 . . ?
 Cl1 O12 O14 50.7(8) . 2_655 ?
 O13 O12 Cl1 66.6(13) 2_655 . ?
 O13 O12 O14 116.0(17) 2_655 2_655 ?
 O11 O11 Cl1 63.9(9) 2_655 . ?
 O11 O11 O14 119.3(12) 2_655 2_655 ?
 O14 O11 Cl1 56.7(9) 2_655 . ?
 Cl1 O13 O14 54.6(9) . 2_655 ?
 O12 O13 Cl1 70.2(14) 2_655 . ?
 O12 O13 O14 125(2) 2_655 2_655 ?
 Cl1 O14 O12 54.0(10) . 2_655 ?
 Cl1 O14 O11 66.3(13) . 2_655 ?
 Cl1 O14 O13 56.2(10) . 2_655 ?
 O11 O14 O12 95.6(16) 2_655 2_655 ?
 O11 O14 O13 101.8(18) 2_655 2_655 ?
 O13 O14 O12 90.1(16) 2_655 2_655 ?

_shelx_res_file
;
TITL ata649c_a.res in P4cc
    ata649c.res
    created by SHELXL-2016/6 at 10:41:49 on 05-Jun-2018
REM Old TITL ata649new in P4/mcc
REM SHELXT solution in P4cc
REM R1 0.148, Rweak 0.018, Alpha 0.010, Orientation as input
REM Flack x = 0.008 ( 0.007 ) from Parsons' quotients
REM Formula found by SHELXT: C66 N16 O20 Cl Mn4 Y
CELL 0.71073 21.8159 21.8159 18.6491 90 90 90
ZERR 4 0.0006 0 0.0007 0 0 0
LATT -1
SYMM -X,-Y,+Z
SYMM -Y,+X,+Z
SYMM +Y,-X,+Z
SYMM +X,-Y,0.5+Z
SYMM -X,+Y,0.5+Z
SYMM -Y,-X,0.5+Z
SYMM +Y,+X,0.5+Z
SFAC C H Cl Mn N O Y
UNIT 320 496 4 16 24 96 4
DFIX 1.52 C39 C40
SADI N3 C25 N3 C29 N3 C33 N3 C37
SADI C25 C26 C26 C27 C29 C30 C30 C31 C33 C34 C34 C35 C37 C38 C38 C39
SADI Cl1 O11 Cl1 O12 Cl1 O13 Cl1 O14
SADI O11 O12 O11 O13 O11 O14 O12 O13 O12 O14 O13 O14
SADI C35 C36 C27 C28 C39 C40 C31 C32
ISOR 0.01 0.02 O13 O12 O11 O14
ISOR 0.01 0.02 C25 C26 C27 C28
ISOR 0.01 0.02 C40 C39 C38 C37 C29 C30 C31 C32

L.S. 10
PLAN  40
TEMP -153(2)
BOND $H
list 4
fmap 2 53
ACTA
OMIT -2 52
REM <olex2.extras>
REM <HklSrc "%.\\ata649c.hkl">
REM </olex2.extras>

WGHT    0.081500   32.871700
FVAR       0.18784   0.90931
Y1    7    0.500000    0.500000    0.490163    10.25000    0.02464    0.02464 =
         0.03079    0.00000    0.00000    0.00000
PART 1
MN1   4    0.523082    0.351441    0.583689    21.00000    0.03331    0.02185 =
         0.04053    0.00328    0.00822    0.00245

MN2   4    0.879068    0.089449    0.445371    21.00000    0.03229    0.03386 =
         0.04134   -0.00118    0.00249    0.00229
PART 0
PART 2
MN1A  4    0.373157    0.420686    0.589338   -21.00000    0.02317    0.03080 =
         0.02589    0.00922   -0.00219   -0.01058

MN2A  4    0.918800    0.125481    0.452774   -21.00000    0.01519    0.00820 =
         0.03091    0.00530   -0.00090   -0.00249
PART 0
PART 1
O1    6    0.494518    0.277204    0.615376    11.00000    0.05370    0.03417 =
         0.07177    0.00597    0.01782    0.00210
O2    6    0.339924    0.393046    0.620722    11.00000    0.02734    0.05668 =
         0.05330   -0.00437    0.00143   -0.00491
O3    6    0.432155    0.446944    0.570381    11.00000    0.03067    0.02857 =
         0.04886    0.00320    0.00499    0.00046
O4    6    0.498441    0.407522    0.432665    11.00000    0.04613    0.03834 =
         0.04473   -0.01067    0.00082    0.00204
O5    6    0.539373    0.323226    0.480190    11.00000    0.06569    0.03452 =
         0.04910   -0.00354    0.01199    0.00782
N1    5    0.440814    0.383669    0.589351    11.00000    0.04315    0.02250 =
         0.03416    0.00269    0.00263   -0.00706
C1    1    0.439084    0.259379    0.638901    11.00000    0.05938    0.04575 =
         0.02795   -0.00742    0.01247   -0.01592
C2    1    0.431540    0.199223    0.660172    11.00000    0.07628    0.03502 =
         0.05666   -0.00123    0.01022    0.00452
AFIX  43
H2    2    0.465400    0.171954    0.657270    11.00000   -1.20000
AFIX   0
C3    1    0.377214    0.178019    0.685056    11.00000    0.09229    0.02680 =
         0.05201    0.00429    0.00648   -0.02560
AFIX  43
H3    2    0.373965    0.136031    0.698016    11.00000   -1.20000
AFIX   0
C4    1    0.327691    0.214246    0.692089    11.00000    0.05884    0.06513 =
         0.06959   -0.00162   -0.00163   -0.02660
AFIX  43
H4    2    0.290844    0.198908    0.712463    11.00000   -1.20000
AFIX   0
C5    1    0.331642    0.274002    0.669100    11.00000    0.04582    0.05275 =
         0.05898    0.00880   -0.00209   -0.00394
AFIX  43
H5    2    0.296920    0.300143    0.672253    11.00000   -1.20000
AFIX   0
C6    1    0.388003    0.296812    0.640445    11.00000    0.06770    0.03875 =
         0.03101    0.00476    0.00368   -0.02557
C7    1    0.390116    0.360021    0.616096    11.00000    0.04216    0.03852 =
         0.03437   -0.00344    0.00010   -0.00680
C8    1    0.526833    0.357292    0.427592    11.00000    0.04439    0.03334 =
         0.04144    0.00021   -0.00003   -0.00667
C9    1    0.551120    0.336962    0.354925    11.00000    0.06621    0.04204 =
         0.04517   -0.00974    0.00048    0.00436
C10   1    0.541509    0.271181    0.344680    11.00000    0.19280    0.06702 =
         0.05422   -0.01997    0.00226    0.02380
AFIX 137
H10A  2    0.557348    0.248861    0.386350    11.00000   -1.50000
H10B  2    0.563157    0.257677    0.301430    11.00000   -1.50000
H10C  2    0.497582    0.262937    0.339397    11.00000   -1.50000
AFIX   0
C11   1    0.620395    0.347189    0.354632    11.00000    0.08261    0.12417 =
         0.06155    0.00357    0.01022    0.04713
AFIX 137
H11A  2    0.629030    0.391254    0.356131    11.00000   -1.50000
H11B  2    0.637999    0.329561    0.310905    11.00000   -1.50000
H11C  2    0.638595    0.327313    0.396674    11.00000   -1.50000
AFIX   0
C12   1    0.525362    0.374996    0.294012    11.00000    0.08588    0.06829 =
         0.04879   -0.01134    0.00529    0.01980
AFIX 137
H12A  2    0.481230    0.367446    0.289741    11.00000   -1.50000
H12B  2    0.545731    0.363586    0.249118    11.00000   -1.50000
H12C  2    0.532461    0.418561    0.303772    11.00000   -1.50000
AFIX   0

Y2    7    1.000000    0.000000    0.541727    10.25000    0.03371    0.03371 =
         0.02993    0.00000    0.00000    0.00000
O6    6    0.803967    0.098264    0.404365    11.00000    0.05518    0.03711 =
         0.07746    0.00487   -0.00880    0.00828
O7    6    0.832338   -0.093176    0.410524    11.00000    0.06506    0.03775 =
         0.06390   -0.00891    0.00198   -0.00074
O8    6    0.920530   -0.036044    0.462394    11.00000    0.03478    0.04018 =
         0.05039    0.00618    0.00054   -0.00059
O9    6    0.917250    0.040808    0.597594    11.00000    0.05734    0.05682 =
         0.04505   -0.00413    0.00902    0.00454
O10   6    0.855330    0.110902    0.550841    11.00000    0.05486    0.06979 =
         0.05168   -0.00749    0.00144    0.02462
N2    5    0.870361    0.000854    0.438252    11.00000    0.03001    0.03511 =
         0.03969    0.00255    0.00204   -0.00006
C13   1    0.763154    0.057084    0.374666    11.00000    0.04700    0.04874 =
         0.05905    0.01219    0.01350   -0.00041
C14   1    0.711937    0.080480    0.341287    11.00000    0.04186    0.05606 =
         0.05203    0.01069    0.00114    0.00323
AFIX  43
H14   2    0.706183    0.123554    0.338022    11.00000   -1.20000
AFIX   0
C15   1    0.668782    0.040784    0.312449    11.00000    0.04720    0.06380 =
         0.04916   -0.00127   -0.00576    0.00527
AFIX  43
H15   2    0.633615    0.057029    0.289180    11.00000   -1.20000
AFIX   0
C16   1    0.676018   -0.020820    0.316960    11.00000    0.05659    0.05247 =
         0.06544   -0.00659   -0.01470    0.00891
AFIX  43
H16   2    0.644900   -0.047204    0.299149    11.00000   -1.20000
AFIX   0
C17   1    0.727580   -0.045234    0.346845    11.00000    0.04891    0.05383 =
         0.06333   -0.00522   -0.01410    0.01248
AFIX  43
H17   2    0.734028   -0.088297    0.347466    11.00000   -1.20000
AFIX   0
C18   1    0.771927   -0.004052    0.377391    11.00000    0.03086    0.07400 =
         0.03437    0.00098   -0.00072    0.01219
C19   1    0.826888   -0.033966    0.410836    11.00000    0.04349    0.03908 =
         0.04026   -0.00478    0.00658   -0.00136
C20   1    0.882313    0.086512    0.602919    11.00000    0.04590    0.06403 =
         0.05303   -0.00784    0.00835    0.01355
C21   1    0.871998    0.113263    0.676961    11.00000    0.08195    0.10461 =
         0.05277   -0.03422    0.00835    0.03549
C22   1    0.900390    0.079709    0.738756    11.00000    0.10236    0.10006 =
         0.04186   -0.00259    0.01080    0.01113
AFIX 137
H22A  2    0.884865    0.037569    0.739991    11.00000   -1.50000
H22B  2    0.889826    0.100525    0.783653    11.00000   -1.50000
H22C  2    0.945038    0.079099    0.733017    11.00000   -1.50000
AFIX   0
C23   1    0.915333    0.176700    0.671867    11.00000    0.25959    0.10206 =
         0.10545   -0.02202   -0.06108    0.01276
AFIX 137
H23A  2    0.889810    0.211430    0.657053    11.00000   -1.50000
H23B  2    0.948084    0.170425    0.636657    11.00000   -1.50000
H23C  2    0.933405    0.185279    0.718919    11.00000   -1.50000
AFIX   0
C24   1    0.810569    0.139657    0.688004    11.00000    0.12572    0.20021 =
         0.11447   -0.03708    0.01866    0.08103
AFIX 137
H24A  2    0.779675    0.107203    0.684266    11.00000   -1.50000
H24B  2    0.802735    0.170922    0.651401    11.00000   -1.50000
H24C  2    0.808430    0.158405    0.735692    11.00000   -1.50000
AFIX   0

PART 0
CL1   3    0.500000    0.000000    0.194776    10.50000    0.03036    0.05113 =
         0.07724    0.00000    0.00000   -0.00550

N3    5    0.630628    0.126467    0.552296    11.00000    0.07391    0.05528 =
         0.06191    0.00642    0.01932    0.01533
C25   1    0.640016    0.060632    0.576777    11.00000    0.07720    0.06095 =
         0.08052    0.00167    0.01376    0.00459
AFIX  23
H25A  2    0.666965    0.061608    0.619473    11.00000   -1.20000
H25B  2    0.599753    0.044762    0.592751    11.00000   -1.20000
AFIX   0
C26   1    0.666362    0.015042    0.525424    11.00000    0.11590    0.11048 =
         0.10956   -0.00057    0.03814   -0.00641
AFIX  23
H26A  2    0.707240    0.029105    0.509278    11.00000   -1.20000
H26B  2    0.639522    0.011773    0.482790    11.00000   -1.20000
AFIX   0
C27   1    0.672235   -0.047876    0.561210    11.00000    0.12295    0.07740 =
         0.10817   -0.01678    0.03706    0.01220
AFIX  23
H27A  2    0.695418   -0.042437    0.606400    11.00000   -1.20000
H27B  2    0.630538   -0.061804    0.574378    11.00000   -1.20000
AFIX   0
C28   1    0.700098   -0.094529    0.522568    11.00000    0.21290    0.20044 =
         0.22979    0.04773    0.02853    0.02757
AFIX 137
H28A  2    0.669412   -0.115270    0.492835    11.00000   -1.50000
H28B  2    0.718465   -0.124085    0.555801    11.00000   -1.50000
H28C  2    0.732101   -0.077187    0.491773    11.00000   -1.50000
AFIX   0
C29   1    0.690225    0.153696    0.531645    11.00000    0.08771    0.06386 =
         0.07292   -0.00246    0.01656   -0.00990
AFIX  23
H29A  2    0.706906    0.129937    0.490842    11.00000   -1.20000
H29B  2    0.718962    0.148701    0.572312    11.00000   -1.20000
AFIX   0
C30   1    0.689267    0.220182    0.510884    11.00000    0.12994    0.08780 =
         0.09692   -0.00422    0.00787    0.00518
AFIX  23
H30A  2    0.675913    0.245125    0.552389    11.00000   -1.20000
H30B  2    0.659440    0.226442    0.471552    11.00000   -1.20000
AFIX   0
C31   1    0.752519    0.241225    0.486590    11.00000    0.13446    0.09543 =
         0.12529   -0.00089    0.00996   -0.03556
AFIX  23
H31A  2    0.782202    0.222642    0.520352    11.00000   -1.20000
H31B  2    0.759835    0.221640    0.439473    11.00000   -1.20000
AFIX   0
C32   1    0.769885    0.302854    0.478973    11.00000    0.18912    0.14420 =
         0.15108    0.02670    0.04838   -0.00454
AFIX 137
H32A  2    0.740307    0.324041    0.448151    11.00000   -1.50000
H32B  2    0.810727    0.305020    0.457241    11.00000   -1.50000
H32C  2    0.770741    0.322516    0.526211    11.00000   -1.50000
AFIX   0
C33   1    0.599358    0.159597    0.611160    11.00000    0.09656    0.08780 =
         0.05493   -0.00426    0.00968    0.03837
AFIX  23
H33A  2    0.561517    0.137092    0.624024    11.00000   -1.20000
H33B  2    0.587103    0.200653    0.593669    11.00000   -1.20000
AFIX   0
C34   1    0.638146    0.167266    0.677874    11.00000    0.06951    0.07650 =
         0.06750   -0.00651    0.00732    0.01609
AFIX  23
H34A  2    0.676481    0.189157    0.665578    11.00000   -1.20000
H34B  2    0.649254    0.126453    0.697104    11.00000   -1.20000
AFIX   0
C35   1    0.602864    0.203617    0.735119    11.00000    0.09109    0.10318 =
         0.07358    0.01843    0.00631    0.01257
AFIX  23
H35A  2    0.592399    0.244683    0.716132    11.00000   -1.20000
H35B  2    0.564155    0.182100    0.746694    11.00000   -1.20000
AFIX   0
C36   1    0.638920    0.210106    0.798901    11.00000    0.16409    0.08416 =
         0.10173    0.01569    0.00500    0.03197
AFIX 137
H36A  2    0.637446    0.171889    0.826465    11.00000   -1.50000
H36B  2    0.622499    0.243694    0.828032    11.00000   -1.50000
H36C  2    0.681473    0.219173    0.785824    11.00000   -1.50000
AFIX   0
C37   1    0.586225    0.127735    0.488712    11.00000    0.10615    0.09503 =
         0.09198    0.00245    0.00942   -0.00986
AFIX  23
H37A  2    0.579637    0.171318    0.476090    11.00000   -1.20000
H37B  2    0.607661    0.108640    0.447599    11.00000   -1.20000
AFIX   0
C38   1    0.523971    0.098285    0.493580    11.00000    0.12660    0.14591 =
         0.12405   -0.00265   -0.00666    0.00521
AFIX  23
H38A  2    0.506114    0.109876    0.540461    11.00000   -1.20000
H38B  2    0.530233    0.053346    0.494526    11.00000   -1.20000
AFIX   0
PART 1
C39   1    0.475962    0.111851    0.436238    11.00000    0.19011    0.19565 =
         0.18636    0.00860    0.00205   -0.00828
AFIX  23
H39A  2    0.440644    0.083849    0.442411    11.00000   -1.20000
H39B  2    0.461002    0.154417    0.441932    11.00000   -1.20000
AFIX   0
C40   1    0.501263    0.104200    0.365370    11.00000    0.32552    0.31717 =
         0.31995    0.00628   -0.01925    0.01091
AFIX  33
H40A  2    0.469670    0.113136    0.329504    11.00000   -1.50000
H40B  2    0.535823    0.132372    0.358981    11.00000   -1.50000
H40C  2    0.515489    0.061891    0.359460    11.00000   -1.50000
AFIX   0

PART 0
O12   6    0.536165   -0.042823    0.230950    10.50000    0.14988    0.12662 =
         0.15377    0.01801   -0.02143    0.01412
O11   6    0.491377   -0.028177    0.124338    10.50000    0.10292    0.09334 =
         0.09227   -0.02175   -0.01729    0.00654
O13   6    0.442590    0.001859    0.223407    10.50000    0.10037    0.14570 =
         0.13346   -0.00243    0.01715   -0.01111
O14   6    0.528815    0.053386    0.185371    10.50000    0.12183    0.09544 =
         0.13557   -0.00322    0.01117   -0.03690
HKLF 4


REM  ata649c_a.res in P4cc
REM R1 =  0.0762 for    6181 Fo > 4sig(Fo)  and  0.1110 for all    8346 data
REM    571 parameters refined using    159 restraints

END

WGHT      0.0816     32.7969

REM Highest difference peak  0.751,  deepest hole -0.374,  1-sigma level  0.100
Q1    1   0.9603 -0.0795  0.4602  11.00000  0.05    0.75
Q2    1   0.9585  0.0806  0.5999  11.00000  0.05    0.71
Q3    1   0.4146  0.4987  0.5728  11.00000  0.05    0.62
Q4    1   0.7594  0.2403  0.4191  11.00000  0.05    0.61
Q5    1   0.4599  0.3219  0.6132  11.00000  0.05    0.60
Q6    1   1.0000  0.0000  0.4883  10.25000  0.05    0.58
Q7    1   0.8374  0.0433  0.4188  11.00000  0.05    0.58
Q8    1   0.8040  0.0596  0.6808  11.00000  0.05    0.55
Q9    1   0.7783  0.2403  0.5037  11.00000  0.05    0.51
Q10   1   0.7224  0.2655  0.4853  11.00000  0.05    0.51
Q11   1   0.7190 -0.0581  0.5792  11.00000  0.05    0.50
Q12   1   1.0000  0.0000  0.5901  10.25000  0.05    0.50
Q13   1   0.8794  0.0883  0.3860  11.00000  0.05    0.48
Q14   1   0.4399 -0.0271  0.2009  11.00000  0.05    0.47
Q15   1   0.4848 -0.0428  0.2581  11.00000  0.05    0.47
Q16   1   0.5223  0.3015  0.6198  11.00000  0.05    0.45
Q17   1   0.5506 -0.0367  0.2169  11.00000  0.05    0.45
Q18   1   0.4608 -0.0356  0.2451  11.00000  0.05    0.43
Q19   1   0.8967  0.1390  0.5568  11.00000  0.05    0.42
Q20   1   0.5573  0.4271  0.4410  11.00000  0.05    0.41
Q21   1   0.3374  0.3435  0.6351  11.00000  0.05    0.41
Q22   1   0.2799  0.2431  0.7796  11.00000  0.05    0.40
Q23   1   0.8640  0.0929  0.3983  11.00000  0.05    0.38
Q24   1   0.5790  0.3756  0.4433  11.00000  0.05    0.38
Q25   1   0.4620  0.4428  0.4790  11.00000  0.05    0.38
Q26   1   0.6653  0.0756  0.5273  11.00000  0.05    0.37
Q27   1   0.6373  0.1629  0.7411  11.00000  0.05    0.37
Q28   1   0.8805  0.0895  0.5043  11.00000  0.05    0.37
Q29   1   0.6017  0.2916  0.3539  11.00000  0.05    0.37
Q30   1   0.4677  0.3197  0.5408  11.00000  0.05    0.36
Q31   1   0.6598  0.1617  0.4974  11.00000  0.05    0.35
Q32   1   0.6005  0.1386  0.7009  11.00000  0.05    0.35
Q33   1   0.5955  0.3433  0.4832  11.00000  0.05    0.34
Q34   1   0.4815  0.4184  0.4964  11.00000  0.05    0.34
Q35   1   0.5813  0.3551  0.5097  11.00000  0.05    0.34
Q36   1   0.7922 -0.0855  0.4291  11.00000  0.05    0.34
Q37   1   0.6568  0.2017  0.7464  11.00000  0.05    0.33
Q38   1   0.5219 -0.0726  0.1917  11.00000  0.05    0.32
Q39   1   0.5032  0.0966  0.4253  11.00000  0.05    0.32
Q40   1   0.9184  0.1183  0.4042  11.00000  0.05    0.32
;
_shelx_res_checksum                15174
_shelx_hkl_file
;
 -25 -14  -3    6.32    6.71
 -25 -13  -5   10.54    8.78
 -25 -12  -7   32.38    8.81
 -25 -12  -6   14.01    7.42
 -25 -11  -8   19.11    7.66
 -24 -16   0   34.13    6.74
 -24 -13  -2    3.07    6.67
 -24 -12  -4   32.71    8.55
 -24 -11  -5   15.59    6.87
 -24 -10  -8    8.51    8.94
 -24 -10  -7  -11.84    6.76
 -24  -9 -12   21.54    9.14
 -24  -9 -11   -4.15    8.31
 -24  -9 -10   34.52    8.58
 -23 -17   2   61.26    6.49
 -23 -15   1    5.65    6.13
 -23 -14   0   -5.13    6.52
 -23 -12  -2   13.24    7.36
 -23 -10  -4   14.20    6.71
 -23  -9  -7    1.66    8.87
 -23  -9  -6   20.97    7.09
 -23  -8 -13    6.40    8.18
 -23  -8 -12   58.87   10.45
 -23  -8 -11    5.08   10.19
 -23  -8 -10   46.25    8.42
 -23  -8  -9   11.93    8.44
 -22 -12   0   25.85    5.38
 -22 -11  -1   68.29    6.22
 -22  -9  -4   15.42    7.62
 -22  -8  -6   14.76    8.63
 -22  -7 -15   14.08    8.48
 -22  -7 -14    5.72   10.45
 -22  -7 -13   27.12   10.99
 -22  -7 -12   25.03    9.81
 -22  -7 -11    9.42    9.33
 -22  -7 -10   29.57    9.69
 -22  -7  -9   22.71    7.68
 -22  -7  -8   32.10    7.58
 -21 -16   4   23.17    4.96
 -21 -13   2   -0.14    5.48
 -21 -12   1   29.54    6.34
 -21 -10  -1   74.40    7.09
 -21  -9  -2  169.04    6.75
 -21  -7  -6   41.61    8.34
 -21  -7  -5   19.58    6.28
 -21  -6 -16   11.48    7.71
 -21  -6 -15    5.45    7.67
 -21  -6 -14    7.75    9.53
 -21  -6 -13    5.61    9.11
 -21  -6 -11   -5.54    9.21
 -21  -6 -10   46.74    9.87
 -21  -6  -9    2.53    7.17
 -21  -6  -8   76.10    7.24
 -20 -19   6   46.37    5.11
 -20 -13   3    0.20    5.17
 -20  -8  -2   50.53    7.32
 -20  -6  -6   11.98    7.67
 -20  -6  -5    5.61    6.19
 -20  -5 -16    0.72    7.45
 -20  -5 -15   -2.40    7.48
 -20  -5 -14   53.19    9.30
 -20  -5 -13   14.06    8.89
 -20  -5 -12   71.20    9.51
 -20  -5 -11   14.23    9.34
 -20  -5 -10  135.88   10.47
 -20  -5  -9    1.02    6.51
 -20  -5  -8   56.31    6.96
 -19 -13   4   50.09    5.55
 -19  -7  -2   91.00    7.50
 -19  -5 -18    1.50    7.93
 -19  -5  -6   48.22    8.15
 -19  -4 -15    6.42    7.12
 -19  -4 -14   34.96    7.52
 -19  -4 -13   -1.15    9.12
 -19  -4 -12  136.31   10.43
 -19  -4 -11   20.40    8.90
 -19  -4 -10  143.86    7.80
 -19  -4  -9   29.91    6.57
 -18 -15   6   29.31    4.37
 -18  -6  -2    0.25    6.35
 -18  -5  -4   63.19    7.37
 -18  -4 -18   13.86    7.49
 -18  -4 -17    1.81    9.81
 -18  -4  -6   58.68    5.65
 -18  -3 -14   11.55    7.36
 -18  -3 -13   10.56    6.72
 -18  -3 -12   62.23    7.16
 -18  -3 -11   35.06    6.80
 -18  -3 -10  118.64    7.28
 -17 -18   8   50.64    3.43
 -17 -12   5   22.33    4.33
 -17  -5  -2   93.22    5.38
 -17  -4 -20    8.19    7.26
 -17  -4 -19  -11.52    8.71
 -17  -4  -4   23.37    5.03
 -17  -3 -17   -0.10    7.09
 -17  -3 -16    9.71    8.82
 -17  -3  -7   10.90    5.25
 -16  -5  -1  219.55    6.76
 -16  -3 -19   13.53    6.55
 -16  -3  -5   35.09    6.87
 -16  -2 -16   29.66    6.97
 -16  -2 -15   -3.10    7.94
 -16  -2  -9   27.19    7.65
 -16  -2  -8   55.94    5.29
 -15 -15   8   24.27    2.77
 -15 -13   7   73.14    3.24
 -15 -10   5   14.93    3.49
 -15  -5   0   57.94    5.55
 -15  -3  -3  143.19    5.12
 -15  -2 -18  -10.99    6.54
 -15  -2  -6   38.83    6.71
 -15  -1 -14   -7.64    6.03
 -15  -1 -13   22.90    6.00
 -15  -1 -12   21.40    5.83
 -15  -1 -11  162.46    6.90
 -15  -1 -10   13.12    5.22
 -14 -12   7   53.33    3.29
 -14  -9   5   23.39    3.11
 -14  -5   1  184.51    4.57
 -14  -3  -2   26.09    4.23
 -14  -2 -20   32.72    6.95
 -14  -2  -4   49.25    4.72
 -14  -1 -17    6.83    6.36
 -14  -1 -16   11.14    7.82
 -14  -1  -7  141.76    5.49
 -13 -11   7   35.83    2.41
 -13  -3  -1  141.19    4.40
 -13  -2  -3   51.87    5.99
 -13  -1 -18   24.39    8.40
 -13  -1  -5   99.08    4.83
 -13   0 -14   70.02    6.37
 -13   0 -13  -14.09    5.92
 -13   0 -12  215.44    7.95
 -13   0 -11    0.43    6.39
 -13   0 -10   65.11    5.25
 -13   0  -9    6.38    4.67
 -12  -2 -22   10.49    6.89
 -12  -2  -2  137.81    5.70
 -12  -1  -4  285.69    5.54
 -12   0 -16   14.12    7.92
 -12   0  -7   -1.82    4.27
 -11  -7   5  141.35    2.97
 -11  -5   3  132.00    3.48
 -11  -2  -1  207.43    4.02
 -11  -1 -21   16.48    6.40
 -11  -1  -3  144.42    5.70
 -11   0 -18   47.06    6.06
 -11   1 -14   73.82    5.64
 -11   1 -13   44.16    5.42
 -11   1 -12   46.39    5.14
 -11   1 -11   15.83    4.59
 -11   1 -10  137.16    5.30
 -10 -14  10    7.11    0.49
 -10  -2 -23   13.62    7.88
 -10  -1  -2  277.70    4.39
 -10   0 -19    6.96    7.35
 -10   1 -16   42.41    5.29
 -10   1  -8  232.60    5.36
  -9  -6   5  221.66    2.74
  -9  -4   3    4.60    2.27
  -9   1  -6  256.24    5.03
  -8 -22  13    8.28    1.58
  -8   0 -21   -6.53    5.74
  -8   1  -5   31.09    3.18
  -8   2 -12   79.58    5.02
  -8   2 -11   15.57    4.09
  -8   2 -10    4.01    4.08
  -7 -21  13    1.29    1.66
  -7   0  -2   38.65    2.78
  -7   1 -19   -2.12    6.60
  -7   2 -15    5.89    6.43
  -7   2  -8  398.42    5.35
  -6 -20  13   -0.33    1.94
  -6  -3   3   17.06    1.41
  -6   0 -22   66.40    6.87
  -6   1 -20   12.73    5.40
  -6   2  -7   51.14    3.13
  -5 -19  13    7.76    2.12
  -5   0  -1    0.40    2.20
  -5   1  -3   96.88    2.82
  -5   2  -6 1240.75    6.52
  -4 -13  11    9.46    1.76
  -4 -11  10   15.59    1.38
  -4   0 -23    9.24    4.67
  -4   1 -21   18.67    4.54
  -4   3 -12   48.62    3.79
  -4   3 -11    6.74    3.34
  -3 -23  14   26.04    3.54
  -3 -18  13   15.15    3.22
  -3 -15  12   54.35    2.74
  -3  -9   9   62.08    1.69
  -3   0 -23    0.58    5.47
  -3   2  -5  146.31    2.65
  -3   3 -13   -3.12    4.19
  -3   3 -12  368.24    5.62
  -3   3 -11    1.90    3.88
  -3   3 -10  559.03    5.20
  -2 -23  14   13.05    3.24
  -2 -22  14    3.40    3.73
  -2 -18  13   33.85    2.90
  -2  -5   6 1256.11    3.40
  -2   2 -19   -8.96    3.82
  -2   3 -14   29.30    4.49
  -2   3  -9   44.83    2.35
  -1 -22  14   11.96    4.06
  -1   2 -19   -3.53    4.68
  -1   3 -15   27.44    3.81
   0 -22  14   15.60    4.73
   0  -6   7   -2.66    1.98
   0   2 -19   -5.47    4.18
   0   3 -15   -4.01    3.53
   1  -6   7  160.52    2.72
   1   2 -19    4.38    3.69
   1   3 -15   25.97    3.04
   2 -22  14   -2.01    5.14
   2  -6   7   41.79    2.92
   3  -5   6  500.45    4.07
   3  -4   5    8.68    2.10
   3  -3   4  639.24    4.01
   3   3  -9    0.75    1.12
   4 -23  14    1.34    5.42
   4 -18  13    0.05    4.10
   4 -15  12   85.01    4.22
   4  -9   9  141.67    3.87
   4  -4   5    7.59    3.23
   4   3 -10  132.54    1.50
   5 -23  14   41.83    6.40
   5 -18  13    1.41    5.31
   5 -13  11   89.15    4.09
   5 -11  10    4.01    3.51
   5  -1   1  501.52    3.75
   5   0 -23    1.13    2.39
   5   1 -21    0.31    2.20
   6 -19  13   39.52    4.76
   6 -16  12   21.84    4.40
   6 -13  11   -0.69    4.97
   6 -11  10   95.55    5.15
   6  -8   8   33.19    3.42
   7 -10   9   71.83    4.18
   7  -7   7   -5.95    3.31
   7  -1 -24    8.57    1.81
   7   1 -20   75.19    2.09
   7   2 -17    2.13    1.03
   8 -14  11    5.89    5.42
   8 -12  10   18.18    4.42
   8 -10   9   79.59    5.57
   8  -6   6  401.47    6.11
   8  -5   5    2.66    3.45
   8  -4   4   98.35    3.94
   8  -1   0    7.69    2.52
   8   1  -4    2.74    2.21
   9 -22  13   11.90    5.88
   9 -21  13   15.30    7.03
   9 -18  12   33.45    5.24
   9 -15  11   11.39    4.52
   9  -9   8   -7.93    4.88
   9  -2   1  154.42    3.55
   9   2  -9  219.02    2.17
  10 -19  12   42.25    5.75
  10 -18  12   -0.69    6.33
  10 -13  10  153.12    6.53
  10 -11   9    6.57    5.76
  10  -8   7   12.47    5.59
  10  -7   6  113.86    4.44
  10  -3   2 1157.07    7.50
  10  -1  -1  338.11    4.97
  10   0  -3   -3.88    3.07
  11 -20  12   34.84    5.97
  11 -19  12   38.56    7.21
  11 -16  11   41.84    6.90
  11 -14  10   53.12    5.25
  11 -12   9   41.35    4.87
  11 -10   8   49.85    5.90
  11  -2   0   98.40    3.98
  11   0  -4  384.85    4.26
  11   1  -7  105.21    2.98
  12 -22  12   18.64    6.30
  12 -21  12    0.61    7.68
  12 -17  11   15.05    7.31
  12 -15  10   79.46    5.52
  12 -11   8  189.78    5.59
  12  -8   6   29.10    4.20
  12  -4   2  458.72    5.95
  12  -3   1   81.69    5.30
  12   0  -5   -2.17    2.64
  12   1  -9    9.02    2.25
  13 -19  11    6.96    5.88
  13 -18  11   25.13    7.17
  13 -16  10   80.18    5.85
  13 -13   9    7.08    6.42
  13 -10   7  147.24    5.40
  13  -3   0  746.31    6.94
  14 -21  11   -4.00    6.28
  14 -20  11   15.16    7.10
  14 -17  10   29.81    6.09
  14 -14   9  -13.52    7.19
  14 -12   8   38.54    6.61
  14  -9   6  214.52    6.86
  14  -8   5   89.95    5.00
  14  -7   4   21.66    4.42
  14  -6   3  143.46    5.13
  14  -5   2   10.00    4.12
  14  -4   1  289.39    6.57
  14   0  -8   17.50    3.15
  15 -18  10   24.19    6.21
  15 -15   9  -10.91    6.79
  15 -13   8   24.99    7.44
  15 -10   6  102.38    5.84
  15  -4   0   -0.05    4.07
  15  -1  -6   36.32    4.28
  16 -20  10   -0.36    5.86
  16 -17   9    8.17    5.86
  16 -14   8    6.68    7.02
  16 -11   6   31.77    5.36
  16  -7   3   48.09    6.07
  16  -4  -1  112.95    4.77
  16  -2  -5   39.64    4.12
  16  -1 -15    1.77    2.21
  16  -1  -9   28.32    3.77
  17 -19   9  -12.84    6.19
  17 -18   9   15.16    7.73
  17 -16   8   33.25    6.33
  17 -12   6   53.25    5.85
  17  -9   4   54.15    6.54
  17  -8   3   -6.34    4.52
  17  -7   2   12.05    4.81
  17  -6   1   19.23    6.53
  17  -4  -2   52.31    6.35
  17  -3  -4   45.84    5.61
  17  -2 -17   -0.48    2.26
  17  -2  -7   62.13    4.84
  18 -20   9    0.22    8.25
  18 -17   8   58.99    8.26
  18 -15   7    8.68    5.73
  18 -13   6   64.28    6.21
  18 -10   4   15.30    5.63
  18  -9   3   32.58    5.48
  18  -8   2   44.56    5.09
  18  -7   1   63.23    5.30
  18  -6   0   10.24    6.81
  18  -3 -18    0.85    2.32
  18  -3  -6   59.20    4.23
  18  -2 -13   43.86    3.90
  18  -2 -12    6.14    4.01
  18  -2 -11   28.73    4.48
  18  -2 -10    9.65    4.33
  19 -19   8   12.41    7.03
  19 -16   7   19.66    8.69
  19 -14   6   70.78    8.74
  19 -11   4   68.50    7.87
  19 -10   3   11.43    5.83
  19  -9   2  148.22    6.61
  19  -8   1  157.22    6.62
  19  -7   0   -1.91    5.59
  19  -5  -3   30.37    5.13
  19  -4  -5   40.66    6.60
  19  -3 -15   26.63    3.55
  19  -3  -9   37.11    4.22
  19  -3  -8    4.68    5.27
  20 -18   7   15.13    8.50
  20 -16   6   11.22    6.63
  20 -14   5    9.30    6.74
  20 -12   4   34.03    8.00
  20 -11   3  -15.63    6.05
  20 -10   2   81.96    6.48
  20  -9   1   15.48    5.86
  20  -8   0  145.99    7.09
  20  -7  -1   52.26    8.29
  20  -6  -3   21.42    5.58
  20  -5  -5   -5.18    4.72
  20  -4 -16    1.29    3.40
  20  -4  -8   64.66    5.03
  21 -18   6   26.46    7.67
  21 -17   6   -2.58    8.39
  21 -16   5    4.57    6.99
  21 -15   5   -3.46    8.19
  21 -14   4   38.43    7.18
  21 -12   3   27.53    9.02
  21 -11   2   60.14    6.65
  21 -10   1   83.61    7.14
  21  -9   0  113.58    7.17
  21  -8  -1    9.37    8.41
  21  -7  -3   -5.53    5.84
  21  -5  -7   17.02    6.64
  22 -18   5    1.32    7.49
  22 -17   5  -14.92    8.97
  22 -15   4    0.95    9.70
  22 -14   3    9.46    7.38
  22 -12   2   36.06    9.14
  22 -11   1   75.79    9.18
  22 -10   0  160.53    9.30
  22  -9  -1   87.44    8.55
  22  -8  -3   40.51    6.51
  22  -6  -7   -9.95    6.67
  23 -17   4   11.76    9.81
  23 -15   3   11.79    9.32
  23 -14   2   -7.51    7.14
  23 -10  -2    7.41    7.03
  23  -9  -3   27.25    6.69
  23  -8  -5    4.11    6.55
  23  -7  -7   -0.69    7.45
  24 -16   2   22.19    9.01
  24 -14   1    0.81    9.99
  24 -13   0   13.05    8.26
  24 -12  -1   22.82    7.88
  24 -11  -2    8.85    7.35
  24 -10  -3    2.34    8.56
  24  -9  -5   -8.23    8.59
  24  -8  -8   -1.48    6.91
  24  -8  -7   -5.49    8.21
  25 -15   0   22.93    9.26
  25 -14  -1   -7.76    8.89
  25 -12  -3   19.05    8.12
  25 -11  -4   42.94    8.17
  25 -10  -6    4.54    8.24
  25  -9  -9   20.22    7.11
  25  -9  -8   16.26    9.89
  26 -12  -5   13.63    9.07
  26 -11  -6  -21.86    9.96
 -25 -14  -4   13.42    6.78
 -25 -13  -6   13.91    9.22
 -24 -15  -1   -2.37    6.02
 -24 -14  -2    1.29    6.24
 -24 -13  -3    8.94    6.31
 -24 -12  -5   36.76    8.18
 -24 -11  -7   -3.54    9.74
 -24 -11  -6   20.82    7.29
 -24 -10 -11  -11.04    8.31
 -24 -10 -10    7.11    8.52
 -24 -10  -9   -0.99    8.08
 -23 -16   1    7.82    6.02
 -23 -13  -1    3.07    5.55
 -23 -11  -4   18.82    8.39
 -23 -10  -6   26.31    8.91
 -23 -10  -5   14.88    6.94
 -23  -9 -13   21.65   10.36
 -23  -9 -10   15.85    9.97
 -23  -9  -9    2.04    9.55
 -23  -9  -8    4.28    7.11
 -22 -17   3   22.28    5.49
 -22 -15   2    9.17    4.48
 -22 -14   1    8.47    6.60
 -22 -11  -2   33.67    7.52
 -22 -10  -3   62.05    6.55
 -22  -9  -5   29.68    8.50
 -22  -8  -8   13.65    9.94
 -22  -8  -7    0.01    7.23
 -21 -19   5    7.23    4.53
 -21 -17   4   14.79    5.05
 -21 -15   3   11.43    5.31
 -21 -11   0   34.69    5.68
 -21  -9  -3   84.70    7.52
 -21  -8  -4    4.22    5.84
 -21  -7 -16   38.81    9.79
 -21  -7  -7   39.87    6.93
 -21  -6 -12   35.11    7.71
 -20 -17   5    3.75    4.42
 -20 -15   4   25.40    5.55
 -20 -12   2   20.19    5.75
 -20 -11   1   27.16    6.46
 -20 -10   0  172.60    7.19
 -20  -9  -1   -4.99    5.06
 -20  -7  -4   15.63    5.90
 -20  -6 -17    8.33    8.03
 -20  -6 -16    4.04    9.07
 -20  -6  -7  -13.21    8.22
 -19 -20   7    1.26    3.56
 -19 -17   6   18.11    3.92
 -19 -15   5   44.84    4.75
 -19 -12   3   28.31    5.61
 -19  -8  -1  155.50    7.04
 -19  -6  -4   37.52    6.07
 -19  -5 -17    6.77    7.43
 -19  -5 -16   -8.28    7.52
 -19  -5  -7    6.47    6.16
 -18 -12   4   23.60    4.67
 -18  -7  -1   38.37    4.96
 -18  -5 -19    1.21    7.76
 -18  -5 -18    4.45    9.03
 -18  -5  -5   15.88    7.24
 -18  -4 -16   24.86    7.16
 -18  -4 -15   -7.28    8.98
 -18  -4  -8   -2.37    7.53
 -18  -4  -7   40.83    6.19
 -17 -16   7   -0.86    3.25
 -17 -14   6   60.63    4.04
 -17 -11   4   42.53    4.75
 -17  -6  -1    9.01    4.71
 -17  -5  -3   33.18    7.15
 -17  -4 -18   11.06    8.64
 -17  -4  -5   20.51    5.01
 -17  -3 -15   -2.72    6.59
 -17  -3 -14   -1.77    8.90
 -17  -3 -13   -0.31    8.21
 -17  -3 -10   -1.12    7.70
 -17  -3  -9  -16.35    5.97
 -17  -3  -8   66.36    5.70
 -16 -11   5   73.31    3.40
 -16  -6   0   58.62    4.60
 -16  -4  -3   46.89    4.71
 -16  -3 -18   -8.39    6.47
 -16  -3 -17   -8.82    8.33
 -16  -3  -6  271.70    7.88
 -16  -2 -14   54.61    6.71
 -16  -2 -13    2.00    6.09
 -16  -2 -12   -9.09    5.90
 -16  -2 -11   34.29    6.10
 -16  -2 -10   17.76    6.02
 -15  -9   4   17.71    3.52
 -15  -6   1  405.17    6.61
 -15  -4 -21    1.78    7.98
 -15  -4  -2    7.85    5.47
 -15  -3 -19    5.51    8.44
 -15  -3  -4  137.19    5.37
 -15  -2 -17    2.30    6.84
 -15  -2 -16   20.55    8.20
 -15  -2  -7  330.25    6.91
 -14 -14   8   21.60    2.60
 -14  -8   4   17.89    2.74
 -14  -7   3  102.83    4.25
 -14  -6   2  201.35    4.39
 -14  -4  -1  284.69    6.21
 -14  -3 -21    6.08    6.68
 -14  -2 -18   25.39    8.19
 -14  -2  -5  197.14    5.61
 -14  -1 -15   33.98    6.19
 -14  -1 -14   57.54    6.36
 -14  -1 -13   26.76    7.87
 -14  -1 -12  185.39    8.45
 -14  -1 -11   18.71    7.21
 -14  -1 -10  157.88    7.76
 -14  -1  -9   29.42    4.90
 -14  -1  -8   67.46    5.27
 -13 -15   9   16.72    2.02
 -13  -4   0   55.21    4.76
 -13  -3 -22   14.02    7.21
 -13  -1 -17   21.93    6.29
 -13  -1  -6   11.87    4.54
 -12 -12   8  295.29    3.19
 -12  -9   6   69.93    2.57
 -12  -4   1   30.75    3.15
 -12  -2 -21    9.77    6.75
 -12   0 -15   -8.06    5.59
 -12   0 -14   73.76    7.24
 -12   0  -9   -4.53    5.92
 -12   0  -8   27.72    4.71
 -11 -13   9    0.81    1.52
 -11  -6   4   31.61    2.08
 -11  -2 -22    5.17    7.02
 -11  -1 -20   27.66    6.43
 -11   0 -17   -2.11    5.59
 -11   0  -6  460.03    6.29
 -10  -9   7  130.43    1.94
 -10  -3   1   68.49    2.77
 -10  -1 -21   -0.54    6.27
 -10   0  -5   -3.19    3.84
 -10   1 -14   64.51    5.58
 -10   1 -13   36.87    5.27
 -10   1 -12  127.00    7.17
 -10   1 -11  121.22    6.67
 -10   1 -10  103.31    4.93
 -10   1  -9   57.04    4.56
  -9  -5   4  784.89    4.12
  -9   0 -19   -1.23    7.37
  -9   0  -4  424.86    6.45
  -9   1  -7  214.76    5.03
  -8  -1  -1   -6.58    3.54
  -8   0  -3   -0.39    2.77
  -8   1 -17   30.13    6.87
  -8   1  -6  318.34    5.89
  -7 -12  10  249.00    1.23
  -7  -1 -23    2.01    5.80
  -7   0 -21    3.35    5.41
  -7   1  -5  105.15    4.36
  -7   2 -14   81.02    4.99
  -7   2 -13   66.68    5.87
  -7   2 -12  265.81    6.74
  -7   2  -9   46.47    3.84
  -6   1 -19   21.13    6.35
  -6   1  -4  491.83    4.46
  -6   2  -8   39.91    4.24
  -5  -8   8  102.35    0.92
  -5  -2   2  190.84    2.13
  -5   0 -22   37.46    5.34
  -5   1 -20   37.72    5.16
  -5   2 -16   97.63    5.80
  -4 -23  14   -0.42    2.99
  -4 -18  13    4.99    2.23
  -4 -15  12   84.91    2.55
  -4  -1 -24   50.42    6.33
  -4   1 -20   24.15    5.91
  -4   1  -3  106.55    3.45
  -4   2  -6 2515.17    8.65
  -3 -22  14   16.83    3.64
  -3   2 -18   90.66    4.77
  -2 -17  13    3.57    3.08
  -2   0 -23   -1.93    4.20
  -2   1 -21    5.02    3.97
  -2   2  -5    1.62    2.57
  -2   3 -10   38.51    2.70
  -1   1 -21   -7.17    4.72
  -1   3 -13   40.88    3.93
   0 -21  14    6.47    3.57
   0 -17  13    4.34    3.01
   0 -14  12    4.68    3.30
   0 -12  11   -2.65    2.28
   0 -10  10  314.13    4.04
   0   0 -23    4.63    4.58
   0   3 -14  104.38    3.96
   0   3  -9   -0.01    2.46
   1 -21  14    7.31    3.68
   1 -17  13   12.06    3.30
   1 -12  11    2.22    2.61
   1 -10  10  134.08    4.05
   1  -2   3  457.89    2.47
   1   0 -23   10.22    4.25
   1   1 -21    9.31    4.10
   2 -21  14   41.74    4.23
   2 -17  13    4.14    3.35
   2 -14  12   37.23    4.59
   2 -12  11   82.07    3.38
   2 -10  10   13.06    3.86
   2  -2   3    1.97    2.47
   2   0 -23   -1.40    3.77
   2   1 -21    4.04    3.62
   3 -14  12  176.66    5.39
   3 -12  11   19.84    4.01
   3   1  -2 1434.68    2.86
   4 -21  14   56.22    5.60
   4 -17  13   11.75    5.44
   4  -6   7   80.23    3.78
   4  -5   6 1026.44    5.76
   4  -3   4  191.67    3.05
   4   3 -13   35.59    1.56
   4   3 -12   56.68    1.70
   4   3 -11    2.93    1.26
   5 -22  14    1.92    5.51
   5  -9   9   62.70    3.65
   5  -5   6   31.67    3.64
   5  -4   5   88.94    3.82
   5   2 -18   11.40    1.92
   6 -23  14    5.25    5.29
   6 -22  14   26.53    6.18
   6 -18  13    1.54    4.60
   6 -15  12   37.49    4.07
   6  -9   9  179.32    5.47
   6  -1 -24    9.07    2.38
   6  -1   1   34.01    3.51
   7 -19  13    3.85    4.90
   7 -13  11   39.96    5.28
   7 -11  10  125.34    5.70
   7  -8   8  304.32    4.99
   7  -2   2   36.80    2.78
   7   0 -22    0.76    1.73
   7   0  -1   -3.57    2.93
   8 -19  13   48.73    7.37
   8 -16  12   33.37    4.93
   8  -7   7    9.60    3.49
   8  -3   3  190.08    3.71
   9 -20  13   10.46    6.62
   9 -17  12   39.49    5.24
   9 -14  11   42.03    4.61
   9 -12  10  216.43    5.83
   9 -10   9   59.77    5.84
   9  -6   6  517.51    6.87
   9  -5   5  319.27    6.09
   9  -4   4  374.68    6.15
   9   0 -21   -0.66    1.18
   9   0  -2  830.90    5.55
  10 -22  13   -0.22    5.86
  10 -21  13   18.73    6.81
  10 -17  12   63.58    6.53
  10 -15  11   17.30    4.35
  10  -9   8  100.36    6.08
  10  -2   1 1583.49    8.64
  11 -18  12   73.89    7.24
  11 -13  10    8.73    5.72
  11 -11   9   15.78    5.94
  11  -7   6   32.78    4.15
  11  -6   5   28.84    4.06
  11  -5   4  154.06    4.58
  11  -4   3  244.52    5.06
  12 -20  12   15.98    6.09
  12 -19  12   28.46    7.05
  12 -16  11   26.79    7.28
  12 -14  10    7.20    4.91
  12 -12   9    2.62    4.72
  12 -10   8   -2.60    5.75
  12  -9   7  170.34    5.30
  12  -1  -2   69.61    4.51
  12   1 -15   15.40    1.34
  13 -22  12   -5.83    6.20
  13 -21  12   19.79    7.80
  13 -17  11  -13.08    6.52
  13 -15  10   29.96    5.39
  13 -11   8  129.90    5.45
  13  -8   6   42.67    5.86
  13  -7   5  125.91    5.02
  13  -6   4   52.69    4.43
  13  -5   3   31.41    4.13
  13  -4   2   75.39    5.85
  13  -2  -1  467.90    6.48
  13  -1  -3  142.21    4.94
  13   0  -6  242.86    3.84
  14 -19  11   13.97    5.94
  14 -16  10   -5.58    5.37
  14 -10   7   -0.78    5.93
  14  -2  -2  408.19    5.60
  14  -1  -4    4.66    4.31
  15 -21  11    3.12    6.19
  15 -20  11  -16.14    7.01
  15 -17  10   12.97    5.81
  15 -11   7   99.06    5.86
  15  -8   5   68.28    6.13
  15  -7   4   81.66    6.23
  15  -6   3  100.04    6.25
  15  -3  -1  107.11    6.06
  15  -2  -3   83.14    5.34
  16 -19  10   31.40    6.47
  16 -18  10   43.07    8.39
  16 -16   9   -8.17    5.71
  16 -12   7   30.37    5.55
  16 -10   6    8.53    6.46
  16  -9   5  -11.09    4.40
  16  -8   4   95.33    5.10
  16  -6   2   52.99    4.77
  16  -5   1  202.83    5.53
  16  -3  -2   22.79    6.00
  16  -2 -19    5.19    1.58
  16  -1  -8  113.84    3.60
  17 -20  10   21.81    7.99
  17 -17   9   -0.09    5.77
  17 -15   8   13.63    6.01
  17 -13   7   -0.42    5.35
  17 -11   6   51.22    6.82
  17 -10   5   -2.04    5.19
  17  -5   0    0.70    4.59
  17  -3 -20    7.35    1.81
  17  -2  -6  123.07    5.52
  18 -19   9   -5.08    6.71
  18 -18   9  -20.75    7.83
  18 -16   8    1.15    6.40
  18 -14   7   26.97    6.33
  18 -12   6  -10.41    7.13
  18 -11   5   44.16    5.97
  18  -5  -1   21.12    5.07
  18  -4  -3   -9.51    4.68
  18  -3  -5   38.19    5.44
  18  -2 -14   42.96    3.14
  18  -2  -9   43.36    4.86
  19 -18   8   30.08    6.92
  19 -17   8  -14.05    7.79
  19 -15   7    8.94    7.96
  19 -13   6   16.47    7.98
  19 -12   5    6.06    5.83
  19  -8   2    4.83    7.07
  19  -6  -1   46.66    5.41
  19  -5  -2  100.00    6.87
  19  -4  -4    5.54    6.08
  19  -3 -16    0.86    3.12
  19  -3  -7   77.54    5.35
  20 -19   8   11.40    8.69
  20 -17   7    7.28    6.92
  20 -15   6   35.31    6.93
  20 -13   5    8.65    6.39
  20  -9   2   14.61    7.58
  20  -6  -2   85.83    6.28
  20  -5  -4   18.10    5.21
  20  -4 -17   -1.34    2.64
  20  -4  -7   19.95    4.76
  20  -4  -6   25.33    5.85
  21 -16   6   57.42    9.60
  21 -14   5    2.36    7.91
  21 -13   4   64.48    7.31
  21 -10   2   36.53    7.91
  21  -7  -2  177.75    7.07
  21  -6  -4   -0.81    5.44
  21  -5  -6    0.02    5.95
  21  -4 -13   -1.18    4.02
  21  -4 -12   62.64    5.21
  21  -4 -11   -4.25    5.20
  21  -4 -10   72.69    5.76
  22 -16   5    4.71    7.34
  22 -14   4   26.51    9.59
  22 -13   3    8.36    7.12
  22  -8  -2   42.17    6.79
  22  -7  -4    0.27    5.75
  22  -6  -6   22.09    5.91
  22  -5 -14   10.25    4.15
  22  -5 -13   -2.19    4.38
  22  -5 -12   11.23    4.24
  22  -5 -11    8.12    4.39
  22  -5 -10    4.06    5.64
  22  -5  -9   -0.64    5.92
  23 -16   4    7.11    7.62
  23 -14   3    1.98    9.02
  23 -13   2   32.55    7.74
  23 -12   1   12.21    7.40
  23 -11   0  128.73    8.24
  23 -10  -1   48.15    7.57
  23  -9  -2  102.05    9.37
  23  -7  -6   48.74    6.60
  23  -6 -14    7.54    4.43
  23  -6 -13   -0.72    5.13
  23  -6 -12   -4.16    4.35
  23  -6 -11    6.97    4.56
  23  -6 -10   10.32    6.11
  23  -6  -9    2.49    6.21
  24 -16   3    2.35    9.71
  24 -15   2    4.42    8.21
  24 -13   1    5.38   10.42
  24 -12   0   38.55   10.20
  24 -11  -1   38.17    9.20
  24 -10  -2   61.24    9.46
  24  -9  -4    1.86    6.91
  24  -8  -6   19.31    8.41
  24  -7 -12   12.12    6.05
  24  -7 -11   -1.80    6.23
  24  -7 -10   -4.47    6.74
  24  -7  -9   -2.59    7.19
  25 -15   1   14.65    8.76
  25 -14   0    5.51    8.72
  25 -13  -1   12.31    8.51
  25 -12  -2   11.74    8.00
  25 -11  -3   23.82    8.00
  25 -10  -5  -12.66    7.78
  25 -10  -4   -2.82    9.26
  25  -9  -7    4.16    7.17
  25  -9  -6   20.26    8.81
  25  -8 -10    9.97    7.54
  26 -13  -2   43.48   10.89
  26 -12  -4    5.22    8.53
  26 -11  -5    6.35   11.29
  26 -10  -7    4.16    9.43
 -25 -14  -5    0.93    7.46
 -24 -16  -1   22.08    7.34
 -24 -15  -2    0.85    8.22
 -24 -14  -3   -8.40    8.12
 -24 -13  -4   17.36    6.66
 -24 -12  -6   11.12    8.67
 -24 -11 -10   68.56   10.80
 -24 -11  -9  -18.48    8.29
 -24 -11  -8   35.64    8.11
 -23 -15   0   17.88    5.70
 -23 -14  -1  -16.27    7.38
 -23 -13  -2    6.54    7.44
 -23 -12  -3    3.01    6.47
 -23 -11  -5   14.01    8.32
 -23 -10  -8   27.38    8.97
 -23 -10  -7   23.49    7.13
 -23  -9 -12   14.64    8.60
 -23  -9 -11   14.34    8.40
 -22 -18   3   -3.57    5.23
 -22 -16   2   40.89    5.84
 -22 -13   0   11.46    5.25
 -22 -12  -1    4.31    5.67
 -22 -10  -4   18.03    6.15
 -22  -9  -7   51.43    9.17
 -22  -9  -6   15.41    6.87
 -22  -8 -14    7.54    8.03
 -22  -8 -13   12.07    8.11
 -22  -8 -12   13.95    8.34
 -22  -8 -11   24.04    8.45
 -22  -8 -10   12.27    7.80
 -22  -8  -9    8.49    7.89
 -21 -14   2    7.08    4.82
 -21 -13   1    7.83    6.08
 -21 -12   0   51.00    6.96
 -21 -11  -1   35.86    7.01
 -21 -10  -2   38.34    6.07
 -21  -9  -4   43.90    7.97
 -21  -8  -6   46.81    9.36
 -21  -8  -5  -11.05    6.08
 -21  -7 -15    1.28    7.95
 -21  -7 -14   12.14    8.30
 -21  -7 -13   13.05    7.80
 -21  -7 -12   -6.56    9.57
 -21  -7 -11   12.51    9.22
 -21  -7 -10   14.48    9.48
 -21  -7  -9    9.59    7.03
 -21  -7  -8   -4.98    7.10
 -20 -20   6   36.71    4.41
 -20 -14   3   29.15    5.16
 -20  -9  -2   28.25    6.74
 -20  -8  -3   12.10    5.74
 -20  -7 -17    7.42    9.44
 -20  -7  -6   22.19    8.08
 -20  -7  -5   50.73    6.53
 -20  -6 -15   13.36    7.50
 -20  -6 -14   -6.47    7.22
 -20  -6 -13   20.30    8.98
 -20  -6 -12   12.65   10.31
 -20  -6 -11   25.36   10.09
 -20  -6 -10  -12.71    8.56
 -20  -6  -9   20.33    6.87
 -20  -6  -8   12.37    6.86
 -19 -14   4   50.51    5.02
 -19 -11   2  112.48    5.16
 -19 -10   1    3.00    4.28
 -19  -9   0   62.61    4.86
 -19  -7  -3  149.73    6.33
 -19  -6 -18  -11.26    7.63
 -19  -6 -17   -4.05    9.30
 -19  -6  -5   75.15    6.31
 -19  -5 -15  -10.93    7.13
 -19  -5 -14    7.93    7.11
 -19  -5 -13    5.72    7.29
 -19  -5 -12    1.54    8.64
 -19  -5 -11    1.98    8.69
 -19  -5 -10   15.61    8.59
 -19  -5  -9   24.96    6.53
 -19  -5  -8   12.90    6.29
 -18 -18   7   -7.65    3.89
 -18 -14   5   14.99    4.66
 -18 -11   3   68.02    4.44
 -18 -10   2  148.62    5.65
 -18  -9   1  138.50    5.99
 -18  -8   0   27.98    4.71
 -18  -6  -3   55.28    5.53
 -18  -5 -17  -14.74    7.36
 -18  -5  -6  153.02    8.39
 -18  -4 -14   12.50    7.42
 -18  -4 -13   10.79    6.80
 -18  -4 -12   11.30    7.34
 -18  -4 -11   12.49    6.52
 -18  -4 -10    3.47    6.34
 -18  -4  -9   -1.56    6.10
 -17 -19   8    5.51    3.30
 -17 -10   3   12.13    4.42
 -17  -9   2  104.47    5.74
 -17  -8   1   25.78    5.29
 -17  -7   0  340.37    6.25
 -17  -6  -2  321.31    8.02
 -17  -5 -19   31.93    9.14
 -17  -4 -17    9.17    7.17
 -17  -4 -16   -0.35    8.83
 -17  -4  -6  256.71    6.80
 -17  -3 -12   22.11    6.34
 -17  -3 -11    3.18    6.41
 -16 -20   9    4.33    2.71
 -16 -17   8   55.83    3.34
 -16 -13   6  110.66    4.14
 -16 -10   4   55.48    3.50
 -16  -9   3    2.97    4.21
 -16  -8   2   16.93    4.68
 -16  -7   1   86.79    4.56
 -16  -5  -2  145.73    5.57
 -16  -4 -19   -2.48    7.14
 -16  -4  -4  140.89    5.58
 -16  -3 -16   33.71    6.81
 -16  -3 -15   -0.52    8.72
 -16  -3  -7   92.37    5.71
 -15 -18   9   25.62    2.61
 -15  -8   3   15.70    3.25
 -15  -7   2   65.97    3.86
 -15  -4 -20   26.70    8.10
 -15  -3 -18    0.62    6.61
 -15  -3  -5  147.65    7.22
 -15  -2 -15   65.03    6.96
 -15  -2 -14   42.68    6.62
 -15  -2 -13   54.94    7.99
 -15  -2 -12   77.35    7.89
 -15  -2 -10  339.80    9.05
 -15  -2  -9   13.43    5.03
 -15  -2  -8  164.64    6.11
 -14  -3  -3  185.31    5.32
 -14  -2 -17   62.15    6.83
 -14  -2  -6   54.37    6.37
 -13 -13   8  366.09    3.69
 -13 -10   6  320.07    4.06
 -13  -3 -21    5.93    6.73
 -13  -3  -2  619.33    7.46
 -13  -2 -19   18.92    6.38
 -13  -2  -4   46.61    4.41
 -13  -1 -16   22.14    6.12
 -13  -1 -15   24.89    6.01
 -13  -1  -8   17.92    6.58
 -13  -1  -7   15.89    4.68
 -12 -14   9    5.50    1.68
 -12  -5   2   21.57    3.00
 -12  -3 -22    8.66    6.91
 -12  -3  -1  114.46    5.06
 -12  -2 -20   14.00    6.56
 -12  -2  -3   40.94    5.81
 -12  -1  -5  109.11    4.81
 -12   0 -13   -9.12    5.17
 -12   0 -12   -2.07    4.71
 -12   0 -11   17.39    4.83
 -12   0 -10   40.61    4.80
 -11  -3 -23   11.25    6.96
 -11  -3   0  175.78    3.73
 -11  -2 -21   14.52    6.62
 -11  -1  -4  673.20    6.71
 -11   0 -16  130.94    6.44
 -11   0 -15   -5.70    6.95
 -11   0  -8  230.42    6.93
 -11   0  -7   -7.52    4.11
 -10  -2 -22   17.01    6.56
 -10  -2  -1 1562.17    8.42
 -10  -1 -20   12.45    6.10
 -10  -1  -3  421.72    6.28
 -10   0  -6   85.72    5.68
  -9 -23  13    3.80    1.28
  -9  -2   0   88.70    2.97
  -9  -1 -21   -2.79    6.12
  -9  -1  -2  327.10    4.28
  -9   0 -18   20.97    6.84
  -9   1 -14   57.81    5.23
  -9   1 -13   34.21    6.57
  -9   1  -9  184.95    6.15
  -9   1  -8  100.29    4.55
  -8  -8   7    0.67    1.13
  -8  -3   2   90.34    2.15
  -8   0 -19   -2.07    6.97
  -8   1 -16   30.72    4.94
  -8   1  -7   41.66    4.97
  -7 -20  13   18.99    1.89
  -7 -14  11   17.31    1.04
  -7  -2 -24    2.32    6.05
  -7  -2   1   64.63    2.85
  -7  -1 -22   78.35    7.98
  -7   0 -20   -0.03    7.10
  -7   1 -17   22.29    6.50
  -6 -19  13   32.95    2.21
  -6  -2 -24   28.30    6.92
  -6  -1   0  549.12    3.78
  -6   0 -21   -0.93    5.17
  -6   0  -2 1029.90    5.93
  -6   2 -14  166.09    5.30
  -6   2 -13   56.34    5.96
  -6   2  -9    2.56    3.48
  -5 -13  11   79.30    1.80
  -5 -11  10    3.78    1.25
  -5   0 -21    0.01    6.22
  -5   2 -15   22.18    5.88
  -5   2  -7  210.69    3.65
  -4 -22  14   22.63    2.87
  -4   0 -22    4.96    4.79
  -4   0  -1   -0.76    2.66
  -4   2 -16  104.39    6.04
  -3 -21  14    9.87    3.22
  -3 -17  13    1.19    2.49
  -3  -1 -24    4.98    4.64
  -3   0 -22   -3.89    5.57
  -3   1 -20   25.13    5.72
  -2 -14  12   31.62    3.11
  -2  -6   7   43.62    1.50
  -2  -3   4 3108.92    3.09
  -2  -1 -24    9.99    5.46
  -1 -20  14   52.58    3.98
  -1 -10  10  127.89    2.91
  -1  -1 -24   22.04    5.24
  -1   3 -12  126.84    3.22
  -1   3 -11   11.36    2.38
   0 -20  14   58.27    4.43
   0  -7   8  754.08    4.30
   0  -2   3    0.71    0.91
   0   2 -18  108.15    5.14
   0   3 -13   -4.74    2.31
   0   3 -11   -0.40    2.89
   1 -20  14   50.26    4.00
   1 -16  13    8.36    4.15
   1  -7   8   12.48    2.16
   2 -20  14   25.63    3.92
   2 -16  13    0.27    4.40
   3 -20  14   65.12    5.41
   3 -10  10   31.59    3.22
   3  -7   8   96.60    3.17
   3  -2   3  230.46    2.82
   3   0   0   -0.94    1.37
   3   3 -13    3.86    1.76
   3   3 -12  363.59    2.98
   3   3 -11   -0.27    1.41
   3   3 -10  566.08    2.99
   4 -20  14    3.52    5.09
   4 -14  12    4.60    3.53
   4  -7   8  194.30    4.32
   4  -2   3  344.07    4.11
   4   2 -18   28.42    2.48
   5 -21  14   -5.24    4.48
   5 -20  14   23.87    5.47
   5 -17  13    1.32    4.22
   5 -12  11   28.82    3.71
   5 -10  10   55.76    4.64
   5  -6   7  163.53    3.77
   5  -3   4  213.02    3.36
   5  -1 -24   10.39    2.79
   6 -21  14   11.62    5.59
   6 -12  11    5.50    4.81
   6  -5   6   64.91    4.11
   6  -4   5  141.46    4.27
   6   0 -22   47.11    2.92
   6   1 -20   14.80    2.08
   6   2 -17   49.12    2.05
   7 -22  14    2.82    6.12
   7 -15  12   51.92    4.33
   7  -9   9   45.57    4.83
   7   1  -3   71.22    2.45
   8 -18  13    9.64    6.33
   8 -15  12   -1.62    5.83
   8 -13  11   34.27    4.38
   8 -11  10  161.41    5.27
   8  -8   8   67.40    4.05
   8  -2   2  179.37    3.56
   8   1 -19   19.50    1.40
   8   2  -7  358.41    2.42
   9 -19  13   12.04    5.36
   9 -16  12   17.67    4.83
   9  -7   7  204.88    4.81
   9  -3   3  354.50    4.98
   9  -1   0  894.91    5.76
  10 -20  13    8.49    6.02
  10 -14  11   12.20    4.38
  10 -12  10   26.21    4.70
  10 -10   9   -4.64    5.68
  10   1  -5   90.93    3.06
  11 -22  13   14.90    5.92
  11 -21  13    3.17    7.31
  11 -17  12   14.89    7.07
  11 -15  11   18.50    5.03
  11  -9   8   30.26    5.54
  11  -8   7  334.07    5.92
  11  -3   2  160.71    4.53
  11  -1  -1  652.31    6.43
  11   0  -3    7.72    3.36
  11   1  -6    3.09    2.67
  12 -18  12   25.91    7.60
  12 -13  10   -3.79    5.85
  12  -7   6  214.31    6.40
  12  -6   5    5.01    4.11
  12  -5   4   90.94    4.52
  12  -4   3    5.58    5.24
  12  -2   0  501.18    5.75
  12   0  -4  291.18    4.76
  12   1  -8  155.76    3.01
  13 -20  12   -5.33    6.08
  13 -19  12   12.91    7.43
  13 -16  11   12.04    6.65
  13 -14  10   13.83    5.23
  13 -12   9    4.99    5.21
  13  -9   7   93.70    5.01
  13  -3   1  127.60    5.72
  14 -21  12   -3.70    7.46
  14 -18  11    0.52    5.97
  14 -17  11   10.65    7.07
  14 -15  10   43.80    5.63
  14 -13   9   14.24    5.26
  14 -11   8   78.15    5.25
  14  -7   5   34.61    5.85
  14  -6   4  156.02    5.23
  14  -5   3   77.02    6.24
  14  -3   0   87.06    4.42
  14   0 -16    9.91    1.41
  14   0  -7    6.68    2.70
  15 -19  11    2.34    5.82
  15 -16  10   58.76    5.97
  15 -14   9   -6.55    5.45
  15 -12   8   61.60    5.77
  15 -10   7   14.92    6.49
  15  -9   6   -7.21    4.49
  15  -5   2  129.00    5.08
  15  -4   1   76.29    6.17
  15  -1 -18   33.52    1.75
  15  -1  -5   17.40    3.48
  15   0 -13    4.59    2.33
  15   0 -12  100.62    3.10
  15   0 -11   -7.34    2.87
  15   0 -10  158.43    3.97
  16 -20  11   -4.83    7.19
  16 -17  10   26.13    7.34
  16 -15   9   14.42    5.46
  16 -13   8  125.85    6.59
  16 -11   7   41.37    6.92
  16  -4   0  292.46    6.01
  16  -2  -4  331.15    5.64
  16  -1 -16    9.62    1.97
  16  -1  -7   13.34    3.11
  17 -19  10    7.72    6.34
  17 -18  10   36.34    7.67
  17 -16   9   16.45    5.94
  17 -14   8   85.05    6.20
  17 -12   7    9.86    5.39
  17  -9   5   18.53    6.79
  17  -8   4  221.30    7.84
  17  -7   3    6.49    4.58
  17  -6   2  275.91    7.79
  17  -4  -1    5.07    4.87
  17  -3  -3   22.66    4.68
  17  -2  -5    1.66    4.94
  17  -1 -13    3.44    2.83
  17  -1 -12   32.98    3.64
  17  -1 -11   -2.87    3.82
  17  -1 -10   34.53    3.88
  18 -17   9   -5.75    8.74
  18 -15   8   18.98    6.56
  18 -13   7   14.24    5.68
  18 -10   5   13.07    7.05
  18  -9   4   39.97    5.80
  18  -8   3  146.73    5.94
  18  -7   2   70.15    5.10
  18  -6   1   24.28    6.48
  18  -4  -2   37.34    6.81
  18  -3  -4    8.57    5.73
  18  -2 -15   39.05    2.82
  18  -2  -8   10.13    3.61
  19 -19   9  -12.19    8.41
  19 -16   8   27.66    8.08
  19 -14   7   31.05    8.22
  19 -11   5   -2.03    7.07
  19 -10   4   -3.78    5.69
  19  -9   3   -3.73    5.46
  19  -7   1   33.95    5.05
  19  -6   0   40.00    6.90
  19  -3  -6   19.84    5.80
  20 -18   8    9.74    6.61
  20 -16   7   -2.70    6.44
  20 -14   6   85.64    7.00
  20 -12   5   26.26    8.49
  20 -11   4   46.33    6.23
  20 -10   3   46.47    6.49
  20  -8   1  -15.95    5.71
  20  -7   0   28.75    5.97
  20  -5  -3   10.69    6.31
  20  -4  -5   18.20    5.82
  20  -3 -13    5.81    3.80
  20  -3 -12  136.56    5.13
  20  -3 -11   27.56    4.62
  20  -3 -10  152.44    6.36
  21 -18   7   13.71    7.05
  21 -17   7    3.85    9.56
  21 -15   6  -21.49    7.99
  21 -12   4   92.64    7.46
  21 -11   3   75.75    6.97
  21  -9   1   28.98    6.58
  21  -8   0   -6.94    6.00
  21  -7  -1   -0.96    7.80
  21  -6  -3   14.88    5.50
  21  -5  -5   22.66    5.21
  21  -4 -15   -0.67    3.49
  21  -4 -14   48.84    4.09
  21  -4  -9    2.79    4.35
  21  -4  -8  120.58    6.38
  22 -17   6    2.82    7.30
  22 -15   5   19.43    7.50
  22 -13   4   -5.91    8.45
  22 -12   3   -6.20    6.90
  22 -11   2   38.51    7.31
  22 -10   1   37.08    6.55
  22  -9   0    5.76    6.26
  22  -8  -1   -5.09    7.67
  22  -7  -3    5.75    5.80
  22  -6  -5   12.14    5.48
  22  -5 -15   -4.29    3.65
  22  -5  -8   70.71    5.68
  23 -17   5    4.70    7.91
  23 -15   4    5.61    7.44
  23 -13   3    6.37    9.19
  23 -12   2   -4.19    8.88
  23 -11   1   27.24    7.17
  23 -10   0   -3.08    6.92
  23  -9  -1    9.26    8.71
  23  -8  -3    6.92    6.30
  23  -7  -5    4.22    6.20
  23  -6  -8   33.28    5.60
  23  -6  -7   19.24    7.38
  24 -15   3    5.38    7.80
  24 -14   2   16.29    8.15
  24 -12   1   17.50    9.26
  24 -11   0    9.75    8.71
  24  -9  -3   -1.50    6.90
  24  -8  -5   -1.80    6.73
  24  -7  -8   26.78    6.09
  24  -7  -7   -0.84    7.76
  25 -14   1    2.94    8.59
  25 -13   0   -7.15    8.01
  25 -12  -1   38.14    8.60
  25 -11  -2   87.33    8.60
  25 -10  -3  -17.31    8.96
  25  -9  -5  -10.20   10.39
  25  -8  -9    8.49    6.13
  25  -8  -8   26.61    8.29
  26 -13  -1  -23.43   11.02
  26 -12  -3    0.87    8.01
  26 -11  -4   -8.35    9.57
  26 -10  -6    3.23    9.34
 -24 -16  -2   42.02    7.88
 -24 -15  -3  -10.85    7.96
 -24 -14  -4   14.69    8.48
 -24 -13  -6   10.01    8.28
 -24 -13  -5   -2.94    7.03
 -24 -12  -9   -5.56   10.80
 -24 -12  -8   -2.19    7.69
 -24 -12  -7    3.22    7.25
 -23 -17   1    0.37    5.03
 -23 -16   0   -4.64    7.21
 -23 -15  -1   -8.35    7.16
 -23 -14  -2   -0.07    7.65
 -23 -13  -3   22.84    7.77
 -23 -12  -4   15.54    6.68
 -23 -11  -7   -1.94    8.61
 -23 -11  -6   -1.36    6.39
 -23 -10 -12   21.19    8.93
 -23 -10 -11  -14.51    8.22
 -23 -10 -10   20.02    8.43
 -23 -10  -9    9.30    7.41
 -22 -17   2    6.29    5.65
 -22 -15   1    5.24    4.85
 -22 -14   0   14.52    6.36
 -22 -13  -1    6.67    7.07
 -22 -12  -2   13.83    6.09
 -22 -11  -3   30.18    6.28
 -22 -10  -5   93.99    7.20
 -22  -9 -14    3.17    8.35
 -22  -9 -13   -4.22    9.78
 -22  -9 -12   50.47   10.36
 -22  -9 -11    9.73    9.81
 -22  -9 -10   85.23   10.53
 -22  -9  -9   38.97   10.16
 -22  -9  -8   37.31    7.63
 -21 -18   4   -3.88    4.82
 -21 -16   3    5.07    4.23
 -21 -10  -3    0.54    7.07
 -21  -9  -5   47.40    9.25
 -21  -8 -16   -1.00    8.13
 -21  -8 -15   28.61    8.21
 -21  -8 -14   -7.91   10.04
 -21  -8  -8   64.79    9.89
 -21  -8  -7   22.11    6.69
 -20 -18   5    2.96    4.48
 -20 -16   4   39.10    5.03
 -20 -13   2   54.42    5.86
 -20 -12   1   15.59    6.05
 -20 -11   0   98.97    7.05
 -20 -10  -1   14.77    4.86
 -20  -8  -4   60.93    6.37
 -20  -7 -16   10.74    7.84
 -20  -7 -15   10.55    9.34
 -20  -7  -7   60.66    6.93
 -19 -18   6    4.01    4.03
 -19 -16   5    3.62    4.76
 -19 -13   3   44.33    5.32
 -19  -9  -1   29.24    6.10
 -19  -8  -2   -4.42    4.94
 -19  -7 -18   22.15    9.81
 -19  -7  -4   81.98    6.43
 -19  -6 -16   -0.97    7.66
 -19  -6 -15   34.97    9.37
 -19  -6  -7  115.33    8.73
 -19  -6  -6   31.12    6.58
 -18 -16   6   59.38    3.60
 -18 -13   4   18.09    4.48
 -18  -7  -2  113.90    5.75
 -18  -6 -18   -2.30    9.16
 -18  -6  -4  188.15    6.70
 -18  -5 -16   -4.44    7.36
 -18  -5 -15   -7.13    9.16
 -18  -5  -8   67.64    8.12
 -18  -5  -7   13.41    6.19
 -17 -13   5    8.49    4.36
 -17  -5 -18   34.80    7.43
 -17  -5  -4  128.04    5.98
 -17  -4 -15   16.00    7.29
 -17  -4 -14   40.12    8.59
 -17  -4  -9    6.35    7.59
 -17  -4  -8   91.90    5.98
 -17  -4  -7   88.15    5.91
 -16 -15   7    0.65    3.39
 -16  -6  -1  171.55    6.64
 -16  -5 -20   10.90    7.36
 -16  -4 -18   10.47    7.15
 -16  -4 -17   14.88    8.42
 -16  -4  -5   94.81    5.48
 -16  -3 -14  -14.12    6.53
 -16  -3 -13   23.35    6.25
 -16  -3 -12   45.84    7.78
 -16  -3 -11   46.12    7.89
 -16  -3 -10  199.99    8.11
 -16  -3  -9    1.84    5.19
 -16  -3  -8   97.81    5.68
 -15 -22  10   19.84    2.22
 -15 -12   6   84.53    3.69
 -15  -5 -21    2.90    6.69
 -15  -5  -1  211.24    5.32
 -15  -4 -19   17.18    8.08
 -15  -4  -3  377.95    6.47
 -15  -3 -17   28.12    6.92
 -15  -3 -16   34.01    8.02
 -15  -3  -6   36.96    6.48
 -15  -2 -11   16.93    5.10
 -14 -11   6  147.70    3.81
 -14  -5   0   15.85    3.85
 -14  -3 -18   16.39    8.12
 -14  -3  -4   43.79    5.90
 -14  -2 -16   10.40    6.47
 -14  -2 -15   23.16    7.83
 -14  -2  -7   76.42    5.26
 -13  -5   1   30.50    3.54
 -13  -4 -22   10.35    7.21
 -13  -2 -18   -5.45    6.12
 -13  -2 -17    9.20    8.77
 -13  -2  -5  136.17    6.30
 -13  -1 -14   -5.43    5.94
 -13  -1 -13   38.23    5.26
 -13  -1 -12   58.31    5.42
 -13  -1 -11   80.58    5.62
 -13  -1 -10   13.87    4.84
 -13  -1  -9   89.39    5.25
 -12  -8   5  175.47    2.89
 -12  -7   4   29.21    2.93
 -12  -6   3   30.57    2.69
 -12  -1 -16   51.74    6.07
 -12  -1  -6  114.15    4.94
 -11  -2 -20   -8.19    7.37
 -11  -2  -2  766.43    6.65
 -11  -1 -18   39.79    5.90
 -11   0 -14   51.47    5.55
 -11   0 -13   -0.18    5.18
 -11   0 -12   71.92    6.60
 -11   0 -11    6.84    5.87
 -11   0 -10   82.62    5.08
 -11   0  -9    0.99    4.35
 -10  -4   2  237.00    3.22
 -10  -2 -21    9.58    7.91
 -10   0 -15    9.27    6.41
 -10   0  -7    6.30    5.72
  -9 -10   8  108.23    1.53
  -9  -1 -20   77.82    6.75
  -9   0 -17    9.86    6.85
  -9   0  -5   -1.05    3.69
  -9   1 -12  122.48    5.31
  -9   1 -11   28.34    4.23
  -9   1 -10  259.95    5.59
  -8 -21  13    2.04    1.55
  -8   0  -4   71.30    4.38
  -8   1 -15    2.83    4.69
  -8   1  -8  471.57    6.92
  -7   0  -3    1.50    2.65
  -7   1  -6    5.65    3.01
  -6  -4   4  610.11    2.62
  -6  -1 -22   23.85    6.83
  -6   0 -20   62.72    7.22
  -6   1 -17   -1.22    5.47
  -6   1  -5   15.92    2.74
  -6   2 -12   78.82    4.33
  -6   2 -11  157.66    4.69
  -5 -18  13    2.35    1.99
  -5 -15  12   37.97    2.06
  -5  -2 -24   33.42    7.22
  -5   1 -18  112.00    6.89
  -5   1  -4  215.29    3.28
  -5   2 -14   28.45    4.36
  -5   2  -9  244.00    5.28
  -5   2  -8  931.27    6.31
  -4 -21  14   49.03    3.31
  -4  -9   9  138.90    1.63
  -4   0 -21  -15.49    6.37
  -4   1 -19    2.96    4.67
  -4   2 -15    8.98    4.99
  -4   2  -7    1.27    2.48
  -3 -12  11   24.86    2.12
  -3  -1   1   53.65    1.37
  -3   1  -3  394.15    3.70
  -3   2 -16  158.26    5.48
  -3   2  -6  189.33    2.99
  -2 -20  14   17.45    3.42
  -2   0 -22   36.46    4.58
  -2   2 -17    8.79    3.58
  -1 -16  13   13.00    3.61
  -1  -7   8   13.28    1.50
  -1   0 -22   75.46    5.95
  -1   1 -20  182.39    6.08
  -1   2  -5  542.46    3.11
   0 -19  14    9.59    4.03
   0 -16  13   -4.55    2.95
   0  -1 -24    6.87    4.78
   0   1 -20  154.81    5.49
   1 -19  14   57.47    4.67
   1  -8   9   61.36    3.11
   1  -1 -24   23.27    4.51
   2  -8   9  119.93    4.03
   2  -1 -24    2.32    4.32
   3 -19  14   10.27    4.96
   3 -16  13   13.60    3.69
   3  -8   9  117.50    4.12
   3  -1 -24    0.09    3.51
   4   0   0 1154.90    4.14
   4   1  -2   24.28    1.55
   5 -19  14    7.16    5.39
   5  -7   8   56.66    3.30
   5  -2   3  347.11    4.41
   5   0 -22   29.52    2.77
   5   1 -20   40.67    2.70
   5   2 -17    1.68    2.25
   5   2  -5  110.70    1.03
   6 -20  14    2.23    4.57
   6 -14  12   -1.41    3.76
   6 -10  10   28.66    3.80
   6  -7   8  165.37    4.97
   6  -6   7    5.62    2.68
   6  -3   4   87.84    3.02
   7 -21  14   -7.86    4.75
   7 -20  14   10.75    5.79
   7 -17  13   18.01    4.81
   7 -14  12  112.88    6.16
   7 -12  11   26.92    4.13
   7  -6   7   17.71    4.48
   7  -5   6   60.11    3.68
   7  -4   5   24.39    2.99
   7  -1   1  282.07    3.61
   7   2 -16    2.53    1.26
   7   2  -6  151.54    1.75
   8 -22  14   -3.63    5.42
   8 -21  14   12.35    6.58
   8 -17  13   14.22    6.28
   8  -9   9   20.62    4.18
   8  -1 -23   -0.62    1.75
   8   0  -1   -3.60    3.10
   9 -22  14    6.88    6.84
   9 -18  13   21.77    5.38
   9 -15  12    0.01    5.89
   9 -13  11   30.10    4.51
   9 -11  10  114.32    5.17
   9  -8   8  185.88    4.84
   9  -2   2  103.23    4.44
   9   1  -4  137.72    2.46
   9   2  -8  181.83    2.12
  10 -19  13   15.52    5.60
  10 -16  12    3.94    5.01
  10 -13  11    0.51    5.95
  10  -7   7   84.77    4.43
  10  -6   6  172.32    4.81
  10  -5   5   64.30    4.18
  10  -4   4  315.53    5.31
  10  -3   3  709.47    7.35
  10  -1 -22   10.42    1.29
  10  -1   0  938.31    7.11
  10   0 -20   57.48    1.40
  10   0  -2  435.81    4.86
  10   2 -12   45.79    1.33
  10   2 -11    7.94    1.18
  11 -20  13    2.32    6.05
  11 -16  12  134.76    7.04
  11 -14  11   31.78    5.03
  11 -12  10   10.24    4.65
  11 -10   9    4.97    5.99
  11  -2   1  216.29    4.58
  12 -21  13    9.83    6.10
  12 -17  12   69.72    7.30
  12 -15  11   64.77    5.53
  12 -11   9   38.46    4.91
  12  -8   7  161.30    5.21
  12  -3   2  352.11    6.76
  12   1  -7  117.30    3.11
  13 -18  12   19.99    7.14
  13 -13  10   11.98    6.65
  13 -10   8  193.61    5.77
  13  -6   5   -4.55    5.87
  13  -5   4  110.72    5.88
  13  -1  -2  372.06    5.83
  13   0  -5   -0.99    2.79
  13   1 -12   53.62    2.11
  13   1 -11   81.48    2.48
  13   1 -10   23.17    2.39
  14 -20  12    3.68    6.46
  14 -19  12    7.64    7.37
  14 -16  11   24.39    7.18
  14 -14  10    4.70    5.29
  14 -12   9    4.23    6.58
  14  -9   7   20.90    4.64
  14  -8   6    2.48    4.27
  14  -4   2  448.42    6.38
  14  -2  -1  197.08    4.75
  14  -1  -3   45.71    5.01
  14   0  -6  134.76    4.57
  15 -18  11    9.11    6.07
  15 -17  11   27.56    7.38
  15 -15  10   -9.46    5.37
  15 -13   9   -4.28    5.32
  15 -11   8    4.01    6.47
  15  -3   0  483.83    7.59
  15  -2  -2   13.07    3.96
  15   0 -14   28.04    2.19
  15   0  -9    5.42    2.49
  15   0  -8   36.92    3.53
  16 -19  11    9.40    5.97
  16 -16  10   56.60    6.20
  16 -14   9    6.97    5.43
  16 -12   8   32.33    5.46
  16  -9   6  113.40    6.72
  16  -8   5    5.40    4.41
  16  -7   4  205.81    5.76
  16  -6   3  132.47    5.26
  16  -5   2  118.30    6.29
  16  -3  -1   19.66    5.61
  16  -2  -3   56.26    5.73
  16  -1  -6   46.73    4.52
  17 -17  10   84.83    8.65
  17 -15   9    5.21    6.03
  17 -13   8    1.71    5.65
  17 -10   6   11.41    5.28
  17  -5   1   33.00    4.76
  17  -3  -2  343.88    7.92
  17  -2 -18    1.85    1.81
  17  -1 -14   20.21    2.66
  17  -1  -9    5.08    3.06
  17  -1  -8  197.82    5.00
  18 -19  10   14.34    6.73
  18 -16   9   13.21    7.70
  18 -14   8    9.92    6.06
  18 -12   7   10.75    7.39
  18 -11   6    4.62    5.49
  18  -5   0   18.37    5.00
  18  -3 -19   10.82    1.86
  18  -2 -16   14.61    2.35
  18  -2  -7   65.19    3.96
  19 -18   9  -10.81    6.37
  19 -15   8    8.27    8.57
  19 -13   7   22.47    7.71
  19 -12   6   55.71    6.23
  19  -9   4   46.89    7.43
  19  -8   3   23.13    6.94
  19  -7   2   98.73    7.56
  19  -5  -1   12.57    5.07
  19  -4  -3   21.84    4.93
  19  -3 -17    1.94    2.39
  19  -3  -5   51.17    5.53
  19  -2 -12   19.62    3.76
  19  -2 -11   77.64    4.94
  19  -2 -10  136.61    5.07
  20 -17   8   48.55    7.18
  20 -15   7   33.56    6.55
  20 -13   6   40.34    6.95
  20 -10   4   54.04    8.74
  20  -9   3    2.06    7.32
  20  -8   2   39.64    7.33
  20  -7   1   52.77    7.52
  20  -6  -1   27.37    5.67
  20  -5  -2   -1.43    6.42
  20  -3 -14   37.05    3.55
  20  -3  -9    4.86    3.99
  20  -3  -8  105.06    5.96
  21 -18   8   21.40    8.95
  21 -16   7   -2.18    8.06
  21 -14   6   51.03    8.37
  21 -13   5   10.46    6.37
  21 -11   4  103.30    8.99
  21 -10   3    8.87    7.68
  21  -9   2  159.46    7.25
  21  -8   1    5.40    8.51
  21  -6  -2   13.76    5.60
  21  -5  -4   25.59    4.97
  21  -4  -7    5.03    4.78
  22 -16   6   -6.59    6.93
  22 -14   5   -6.35    6.37
  22 -11   3   22.30    9.05
  22 -10   2   78.65    8.81
  22  -9   1   81.52    9.30
  22  -7  -2   29.67    6.37
  22  -6  -4  101.45    6.32
  22  -5  -7  -15.07    5.40
  22  -5  -6   90.70    7.44
  23 -16   5   -1.76    7.61
  23 -14   4    7.12    7.36
  23 -11   2   58.72    9.16
  23 -10   1   36.53    8.47
  23  -8  -2   -9.68    6.33
  23  -7  -4   59.13    6.88
  23  -6  -6  103.19    7.75
  24 -16   4   -1.46    8.06
  24 -14   3   -2.83    7.62
  24 -13   2   17.48    8.09
  24 -10  -1  -16.53    6.98
  24  -9  -2  -11.21    8.43
  24  -8  -4   59.15    7.14
  24  -7  -6   40.49    7.98
  24  -6 -12   29.26    5.61
  24  -6 -11    2.98    5.53
  24  -6 -10   13.24    6.05
  25 -14   2   28.37   10.06
  25 -13   1   28.16    8.21
  25 -12   0   33.56    8.20
  25 -11  -1   21.75    8.89
  25 -10  -2    9.25    9.04
  25  -9  -4   47.98    8.86
  25  -8  -7  -10.77    6.74
  25  -8  -6  -14.88    7.96
  26 -12  -2   36.81    8.64
  26 -11  -3    7.95    7.87
  26 -10  -5   41.63    8.13
  26  -9  -8   34.85    7.50
  26  -9  -7    4.51    8.85
 -24 -16  -3    4.25    7.97
 -24 -15  -4   -8.98    8.99
 -24 -14  -5   -1.35    7.05
 -24 -13  -8   13.28    9.37
 -24 -13  -7    1.33    7.21
 -23 -17   0   28.22    7.06
 -23 -13  -4   15.25    8.32
 -23 -12  -6   23.30    8.49
 -23 -12  -5    6.85    6.84
 -23 -11 -12    3.10   10.22
 -23 -11 -10  -10.27    9.69
 -23 -11  -9    1.26    7.98
 -23 -11  -8  -11.19    6.88
 -22 -16   1   15.41    6.18
 -22 -12  -3   10.41    7.36
 -22 -11  -5   44.31    8.85
 -22 -11  -4   14.00    6.36
 -22 -10 -14   13.28   10.12
 -22 -10  -8   21.26    9.07
 -22 -10  -7   13.04    7.28
 -22 -10  -6   10.51    7.15
 -21 -19   4   12.60    4.92
 -21 -17   3   -7.27    5.68
 -21 -15   2   35.67    4.87
 -21 -14   1   13.26    5.95
 -21 -13   0   10.12    6.66
 -21 -12  -1   52.28    7.02
 -21 -11  -2   42.61    6.10
 -21 -10  -4   22.33    7.52
 -21  -9 -15    0.97    9.78
 -21  -9  -6   11.82    6.75
 -21  -8 -13    6.17    7.94
 -21  -8 -12   71.42    8.17
 -21  -8 -11    1.37    7.91
 -21  -8 -10   88.61    8.57
 -21  -8  -9    4.48    7.66
 -20 -19   5   -6.03    4.47
 -20 -15   3   -6.92    4.90
 -20 -10  -2   87.75    7.32
 -20  -9  -3   16.92    5.66
 -20  -8 -16   -7.88    9.24
 -20  -8  -6   24.21    8.10
 -20  -8  -5    7.99    6.14
 -20  -7 -14   14.47    7.50
 -20  -7 -13   41.74    7.88
 -20  -7 -12   68.66    8.30
 -20  -7 -11   23.64    7.89
 -20  -7 -10   65.75    8.29
 -20  -7  -9  -12.17    6.59
 -20  -7  -8  112.14    7.57
 -19 -19   6   19.57    4.37
 -19 -15   4   62.53    5.14
 -19 -12   2   28.37    4.56
 -19 -11   1   24.07    4.37
 -19 -10   0   69.00    5.03
 -19  -8  -3   16.77    5.34
 -19  -7 -17   -1.28    7.52
 -19  -7 -16   63.86    9.38
 -19  -7  -5   66.59    6.55
 -19  -6 -14   13.03    7.62
 -19  -6 -13   10.69    7.40
 -19  -6 -12   23.94    7.51
 -19  -6 -11   32.89    8.79
 -19  -6 -10   66.95    7.15
 -19  -6  -9    9.03    6.77
 -19  -6  -8  139.35    7.47
 -18 -19   7   -6.19    3.62
 -18 -12   3   -1.22    5.12
 -18  -9   0    8.75    5.65
 -18  -8  -1   69.49    5.15
 -18  -7  -3   -7.03    5.25
 -18  -6 -17    2.02    7.41
 -18  -6 -16   23.91    9.21
 -18  -6  -5   35.97    6.31
 -18  -5 -14   19.22    6.76
 -18  -5 -13   -4.68    7.28
 -18  -5 -12   18.17    6.86
 -18  -5 -11  -17.28    6.59
 -18  -5 -10   53.20    6.75
 -18  -5  -9    0.32    6.23
 -17 -20   8   41.50    3.84
 -17 -17   7   -2.91    3.60
 -17 -15   6    5.20    4.06
 -17 -12   4    3.73    4.35
 -17  -8   0   86.59    6.55
 -17  -7  -1   43.49    4.93
 -17  -6 -19   -4.24    7.79
 -17  -6  -3   42.71    5.46
 -17  -5 -17   -1.02    6.98
 -17  -5 -16   74.93    9.47
 -17  -5  -6  166.37    7.67
 -17  -5  -5    8.62    5.13
 -17  -4 -13    5.77    6.57
 -17  -4 -12   37.68    6.91
 -17  -4 -11   32.92    6.52
 -17  -4 -10   87.49    6.83
 -16 -21   9    2.95    2.81
 -16 -12   5    3.78    3.93
 -16  -7   0  102.96    5.89
 -16  -6 -20    7.03    8.86
 -16  -5 -19    4.84    7.33
 -16  -5 -18   13.19    8.57
 -16  -5  -3  153.28    5.66
 -16  -4 -16   23.91    6.94
 -16  -4 -15   44.15    8.32
 -16  -4  -6   75.63    5.58
 -15 -16   8   62.94    2.81
 -15 -14   7    4.65    3.02
 -15 -11   5   31.85    3.58
 -15  -6   0   31.41    4.21
 -15  -5 -20    6.03    8.35
 -15  -5  -2  187.16    6.57
 -15  -4 -18   11.83    6.42
 -15  -4  -4    1.23    5.95
 -15  -3 -15   47.25    6.97
 -15  -3 -14   23.04    8.81
 -15  -3  -8   34.83    6.68
 -15  -3  -7   75.89    5.45
 -14 -10   5   27.31    3.16
 -14  -6   1   20.35    3.75
 -14  -5 -21    4.34    8.04
 -14  -4 -20   18.19    6.79
 -14  -4  -2  361.38    5.99
 -14  -3 -17   34.44    8.16
 -14  -3  -5  345.99    7.91
 -14  -2 -14   54.88    6.46
 -14  -2 -13    7.33    6.12
 -14  -2 -12   18.17    5.42
 -14  -2 -11  121.52    7.39
 -14  -2 -10   46.97    5.28
 -14  -2  -9   41.27    5.23
 -14  -2  -8   61.14    5.32
 -13 -18  10   34.64    1.85
 -13  -9   5  241.17    3.52
 -13  -8   4   12.56    3.45
 -13  -7   3    3.58    3.96
 -13  -6   2   26.06    3.24
 -13  -4 -21   15.08    6.67
 -13  -4  -1   19.04    3.75
 -13  -3 -19   18.33    6.36
 -13  -3  -3  135.59    4.81
 -13  -2 -16   19.34    6.20
 -13  -2  -6  168.37    5.48
 -12  -4   0 1364.59    7.99
 -12  -2  -4  189.12    5.09
 -12  -1 -15   16.87    5.72
 -12  -1 -14   69.96    6.34
 -12  -1 -13   32.61    7.09
 -12  -1  -8  146.82    5.42
 -12  -1  -7  110.93    5.08
 -11 -10   7   93.60    2.21
 -11  -4   1  100.22    3.10
 -11  -2 -19   30.90    7.45
 -11  -1  -5   76.47    4.44
 -10  -8   6   54.56    1.88
 -10  -5   3   12.57    2.11
 -10  -2 -20   63.56    7.87
 -10  -1  -4  526.94    6.07
 -10   0 -14   84.54    5.56
 -10   0 -13   -2.02    6.59
 -10   0  -8  153.62    4.99
  -9  -3   1  163.22    2.99
  -9  -1 -19    5.83    6.92
  -9   0  -6  303.86    6.58
  -8  -4   3   65.54    1.76
  -8  -2   0 1018.68    5.97
  -8   0 -17    5.11    6.31
  -8   1 -12  282.26    5.98
  -8   1 -11  164.56    6.07
  -8   1 -10  669.81    7.10
  -8   1  -9   49.74    4.25
  -7  -3 -24   14.23    7.18
  -7  -1 -21    1.46    5.52
  -7  -1  -1  325.22    3.65
  -7   1 -15   14.87    4.76
  -7   1  -7   46.52    3.68
  -6 -23  14    9.66    2.29
  -6  -6   6  175.34    1.19
  -6  -5   5   14.42    1.05
  -6   0 -19   -1.12    6.33
  -6   1 -16   11.49    6.13
  -5  -1 -22   11.15    5.03
  -5   0 -20   32.47    6.36
  -5   1 -17   50.21    5.65
  -5   2 -12   14.93    3.78
  -5   2 -10    6.43    3.38
  -4 -17  13   10.19    2.37
  -4   1 -18   92.57    6.27
  -4   2 -14  516.00    6.46
  -3 -14  12  176.76    3.15
  -3  -5   6  502.78    1.71
  -3  -1 -23    3.26    4.64
  -3   0 -21   -4.85    5.45
  -3   2 -15    8.46    4.51
  -3   2  -7   22.63    3.20
  -2 -16  13    8.47    3.22
  -2  -7   8  432.57    2.84
  -2  -1 -23   -3.47    6.06
  -2   2  -6  123.18    3.09
  -1 -19  14   57.69    3.93
   0 -23  15    9.72    4.29
   0 -13  12  250.64    4.67
   0  -8   9    0.41    2.45
   0   0 -22  166.78    5.12
   0   2 -17    3.30    3.34
   1 -23  15    1.65    4.42
   1   0 -22   75.47    4.97
   1   2 -17    6.15    3.87
   2 -23  15    1.85    4.52
   2 -18  14   55.56    4.73
   2 -15  13   64.93    4.63
   2 -11  11  126.63    3.53
   2   0 -22   32.37    4.16
   2   1 -20   29.77    3.85
   3 -23  15   12.98    5.06
   3 -18  14   28.49    4.88
   3 -15  13   50.80    4.78
   3 -13  12   84.59    3.79
   3 -11  11   13.30    3.01
   4 -18  14    6.85    4.90
   4 -11  11    5.21    4.12
   4  -8   9  226.37    4.23
   4   2 -17   87.58    3.03
   5 -13  12    8.62    5.09
   5 -11  11   32.51    5.12
   5  -8   9  211.87    4.31
   5   0   0 4380.51    8.49
   5   1  -2 1086.72    3.98
   6 -19  14   11.00    4.53
   6 -16  13   10.30    4.37
   6  -8   9  164.43    5.24
   6  -2   3    6.36    2.59
   7 -19  14   52.15    5.79
   7 -16  13   26.28    5.57
   7 -10  10   89.81    4.36
   7  -7   8    9.26    3.47
   7  -3   4  260.82    3.97
   7  -1 -23    2.49    2.40
   7   1 -19    3.99    1.71
   8 -20  14   12.01    5.19
   8 -14  12   28.79    4.30
   8 -12  11  120.54    5.05
   8 -10  10   31.53    5.91
   8  -6   7  388.29    6.29
   8  -5   6  361.79    5.12
   8  -4   5  256.26    4.67
   8  -1   1   12.95    2.69
   8   0 -21   -3.12    1.68
   8   1  -3  106.10    2.88
   8   2 -15   18.46    1.01
   9 -21  14   -3.68    5.54
   9 -17  13    5.37    5.10
   9 -12  11   18.75    5.80
   9  -9   9    0.58    4.23
  10 -22  14    7.31    6.00
  10 -21  14   60.21    7.55
  10 -18  13    8.08    5.47
  10 -15  12   52.21    5.17
  10 -11  10   31.39    4.77
  10  -8   8   88.86    4.48
  10   2 -10   17.26    1.29
  11 -19  13   10.06    5.68
  11 -18  13   -4.30    6.85
  11 -13  11   -1.11    6.07
  11  -7   7   50.88    4.33
  11  -6   6   60.35    4.42
  11  -5   5   15.27    3.99
  11  -4   4  881.59    7.38
  12 -20  13    4.56    6.02
  12 -19  13   -5.39    7.15
  12 -16  12   24.20    7.15
  12 -14  11    4.60    5.04
  12 -12  10   84.40    5.53
  12 -10   9   -1.72    6.07
  12  -9   8   56.08    4.65
  12  -1  -1   80.48    3.80
  13 -21  13  -14.95    6.30
  13 -17  12   28.86    7.02
  13 -15  11   -6.46    5.11
  13 -11   9   -5.63    5.02
  13  -8   7   44.81    4.60
  13  -7   6   75.48    4.72
  13  -4   3   79.86    4.48
  13  -2   0  614.65    6.43
  13   0  -4  177.93    4.66
  13   1 -13   19.38    1.75
  13   1  -9   83.20    2.80
  14 -18  12   12.63    7.12
  14 -13  10   -3.74    6.56
  14 -10   8   -1.88    4.58
  14  -3   1  103.87    4.59
  15 -20  12    7.55    6.38
  15 -19  12   18.57    7.66
  15 -16  11   17.08    7.05
  15 -14  10   47.62    7.13
  15 -12   9   28.63    6.59
  15  -9   7    7.89    6.52
  15  -8   6  277.63    6.28
  15  -7   5  142.50    5.30
  15  -6   4  119.78    5.17
  15  -5   3  206.56    5.61
  15  -1  -4  241.85    4.90
  15   0  -7    1.51    3.58
  16 -18  11   18.97    6.33
  16 -15  10   47.47    7.65
  16 -13   9    9.42    5.50
  16 -10   7   39.49    5.35
  16  -4   1  121.37    4.99
  16  -1 -17   15.73    1.86
  16  -1  -5   16.79    5.09
  17 -19  11   36.36    7.65
  17 -16  10   14.26    7.44
  17 -14   9    1.88    6.01
  17 -12   8  117.28    8.43
  17 -11   7    0.15    5.37
  17  -8   5   48.21    6.53
  17  -7   4  176.88    7.10
  17  -6   3   36.90    6.33
  17  -4   0    5.52    4.59
  17  -2  -4   57.06    4.44
  17  -1 -15    6.41    2.45
  17  -1  -7   33.58    4.41
  18 -18  10   14.69    6.56
  18 -15   9    1.72    7.80
  18 -13   8   76.11    7.69
  18 -10   6   -1.93    6.90
  18  -9   5   77.68    5.92
  18  -8   4   29.86    5.41
  18  -7   3    5.71    4.77
  18  -6   2   28.52    4.89
  18  -4  -1   17.42    4.85
  18  -3  -3   73.83    5.07
  18  -2  -6   90.09    4.50
  19 -17   9    7.35    6.54
  19 -16   9    3.83    8.10
  19 -14   8   16.98    8.23
  19 -11   6    0.83    7.16
  19 -10   5   32.00    5.80
  19  -6   1   44.43    5.91
  19  -4  -2   51.77    6.47
  19  -3  -4  158.26    6.61
  19  -2 -14   18.56    3.15
  19  -2 -13   22.83    3.37
  19  -2  -9   14.46    3.91
  19  -2  -8   91.29    5.78
  20 -18   9    6.56    6.97
  20 -16   8   -1.93    6.61
  20 -14   7    9.50    6.30
  20 -12   6   73.75    8.27
  20 -11   5   16.93    5.95
  20  -6   0  131.99    6.46
  20  -4  -4   42.14    5.00
  20  -3 -15   13.46    3.17
  20  -3  -7   27.45    4.76
  21 -17   8  -10.03    8.51
  21 -15   7    6.45    6.59
  21 -13   6   35.18    8.32
  21 -12   5   22.25    6.07
  21  -7   0   72.64    6.35
  21  -6  -1   13.81    7.04
  21  -5  -3   27.59    6.79
  21  -4 -16    4.63    2.98
  21  -4  -6  107.61    5.71
  22 -17   7   -4.87    6.99
  22 -15   6   13.80    6.93
  22 -13   5    2.71    6.61
  22 -12   4   25.35    6.75
  22  -8   0  159.47    7.60
  22  -7  -1   -7.53    7.42
  22  -6  -3   14.68    5.73
  22  -5  -5   21.43    6.47
  22  -4 -13    2.04    4.42
  22  -4 -12   -6.87    4.44
  22  -4 -11   -6.60    4.83
  22  -4 -10   24.50    5.14
  22  -4  -9   20.06    5.74
  23 -16   6    0.64    8.67
  23 -15   5   14.13    7.55
  23 -13   4    9.98    7.04
  23 -12   3    0.63    7.14
  23  -9   0   78.53    7.47
  23  -8  -1   76.20    9.19
  23  -7  -3   19.73    6.15
  23  -6  -5   13.58    5.61
  23  -5 -14   26.03    4.28
  23  -5 -13    0.21    4.56
  23  -5 -12   23.01    4.37
  23  -5 -11   -0.80    4.36
  23  -5 -10    9.51    4.71
  23  -5  -9   -0.08    5.00
  23  -5  -8   77.42    6.99
  24 -15   4  -10.85    7.87
  24 -14   4   -0.22    8.97
  24 -13   3    3.18    7.81
  24 -12   2   -2.40    7.90
  24 -11   1   11.53    7.39
  24 -10   0  172.44    8.57
  24  -9  -1    0.47    8.63
  24  -8  -3    4.75    6.40
  24  -7  -5    6.48    6.36
  24  -6 -13    7.23    4.06
  24  -6  -9   33.10    5.65
  24  -6  -8   48.28    7.14
  25 -13   2   39.09    9.94
  25 -12   1    4.95    9.84
  25 -11   0   46.87   10.61
  25  -9  -3   14.11    7.23
  25  -8  -5    8.28    7.12
  25  -7 -11   23.11    5.24
  25  -7 -10   -6.83    5.92
  25  -7  -9   11.21    5.96
  25  -7  -8   11.16    7.82
  26 -13   0   15.21    9.08
  26 -12  -1  -17.83    8.44
  26 -11  -2    6.33    7.81
  26 -10  -4  -12.77    7.79
  26 -10  -3   18.09    9.36
  26  -9  -6   34.34    7.47
  26  -9  -5  -18.13    9.41
  26  -8  -9  -11.54    7.72
  26  -8  -8    1.22    7.96
 -24 -15  -5   -4.91    6.96
 -24 -14  -7  -11.71    7.07
 -24 -14  -6   14.20    7.18
 -23 -16  -1    1.28    5.69
 -23 -15  -2   58.37    6.73
 -23 -14  -4   11.21    8.24
 -23 -14  -3   -0.86    6.47
 -23 -12 -11    1.83   10.26
 -23 -12 -10  -10.97    9.87
 -23 -12  -9   -5.01    9.66
 -23 -12  -8   13.78    8.88
 -23 -12  -7    4.80    7.37
 -22 -18   2   20.35    5.01
 -22 -17   1    6.57    5.90
 -22 -15   0   14.56    5.63
 -22 -14  -1   47.48    5.86
 -22 -13  -2   40.25    6.06
 -22 -12  -4   11.32    7.85
 -22 -11  -6   72.45    7.61
 -22 -10 -13   -3.04    8.18
 -22 -10 -12  -17.37    8.27
 -22 -10 -11   13.30    8.45
 -22 -10 -10   10.69    8.18
 -22 -10  -9   19.04    7.89
 -21 -18   3    1.27    5.22
 -21 -16   2   10.15    5.52
 -21 -12  -2   70.53    7.23
 -21 -11  -3   77.09    6.40
 -21 -10  -5   12.50    6.70
 -21  -9 -14    7.83    7.99
 -21  -9 -13   -2.86    7.83
 -21  -9 -12   22.29   10.89
 -21  -9 -11   27.37    9.80
 -21  -9 -10   13.50    9.52
 -21  -9  -9   19.58    9.57
 -21  -9  -8   11.54    7.15
 -21  -9  -7    4.96    6.64
 -20 -17   4   -2.87    3.80
 -20 -14   2    2.23    4.37
 -20 -13   1   -6.72    5.95
 -20 -12   0   61.29    6.83
 -20 -11  -1   31.30    5.59
 -20  -9  -4   -3.25    5.70
 -20  -8 -15  -17.95    7.59
 -20  -8 -14  -16.87    9.63
 -20  -8 -13  -10.47    8.93
 -20  -8  -8   30.76    9.53
 -20  -8  -7   -2.19    6.58
 -19 -17   5   22.66    4.37
 -19 -14   3    5.02    5.11
 -19 -10  -1   -1.08    6.02
 -19  -9  -2  131.13    5.93
 -19  -8 -17    7.48   10.05
 -19  -8  -4  112.28    6.16
 -19  -7 -15    2.40    7.32
 -19  -7 -14   27.26   10.24
 -19  -7  -7   -5.05    7.90
 -19  -7  -6   70.73    6.79
 -18 -20   7    6.29    3.65
 -18 -17   6   24.56    4.01
 -18 -15   5    0.50    3.18
 -18 -11   2   -6.34    3.72
 -18 -10   1   29.98    4.23
 -18  -8  -2    9.29    6.35
 -18  -7 -18   14.35    7.72
 -18  -7 -17  -12.77    9.29
 -18  -7  -4  217.33    8.23
 -18  -6 -15   18.17    7.43
 -18  -6 -14   92.23   10.21
 -18  -6  -7   10.62    7.99
 -18  -6  -6  280.05    7.35
 -17 -11   3   -4.82    3.44
 -17 -10   2   17.14    4.69
 -17  -9   1   22.99    4.20
 -17  -7 -19    1.85    9.24
 -17  -7  -2   40.59    6.62
 -17  -6 -18   29.40    7.57
 -17  -6 -17    2.69    8.88
 -17  -6  -4  259.38    7.01
 -17  -5 -15   -8.50    7.06
 -17  -5 -14   57.06    9.21
 -17  -5  -8  206.79    8.96
 -17  -5  -7   52.05    5.68
 -16 -18   8   -3.07    3.26
 -16 -14   6   28.31    3.65
 -16 -11   4    1.51    3.02
 -16 -10   3   32.60    4.72
 -16  -9   2    5.25    5.05
 -16  -8   1   19.42    3.97
 -16  -6 -19   17.51    8.88
 -16  -6  -2   28.64    5.11
 -16  -5 -17   40.07    9.01
 -16  -5  -4   94.56    5.45
 -16  -4 -14   48.16    7.39
 -16  -4 -13   32.54    8.54
 -16  -4 -12    8.33    8.02
 -16  -4  -9   47.08    7.66
 -16  -4  -8   14.52    5.93
 -16  -4  -7   50.41    5.66
 -15 -19   9   11.45    2.84
 -15 -10   4    3.34    3.50
 -15  -9   3   22.26    4.43
 -15  -8   2   -2.56    4.28
 -15  -7   1   32.81    3.96
 -15  -5 -19    5.15    6.87
 -15  -4 -17   38.85    6.82
 -15  -4 -16   26.83    7.92
 -15  -4  -5  135.93    6.76
 -15  -3 -13   43.33    6.61
 -15  -3 -12   61.65    6.52
 -15  -3 -11   57.07    5.69
 -15  -3 -10    2.20    5.11
 -15  -3  -9   55.05    5.39
 -14 -20  10   -2.22    2.16
 -14 -17   9    8.56    2.02
 -14 -13   7   19.34    2.98
 -14  -9   4    3.71    3.45
 -14  -8   3   37.27    3.14
 -14  -7   2   25.44    3.47
 -14  -5 -20  -15.90    8.13
 -14  -5  -1  204.66    5.12
 -14  -4 -19    2.34    6.67
 -14  -4 -18   42.05    8.46
 -14  -4  -3   47.83    4.63
 -14  -3 -16   27.77    6.43
 -14  -3 -15   45.60    8.11
 -14  -3  -6  174.49    7.33
 -13 -22  11   14.61    1.70
 -13 -12   7    0.94    2.59
 -13  -4 -20    9.06    6.66
 -13  -3 -18   46.49    6.51
 -13  -3  -4  239.94    6.66
 -13  -2 -15   75.67    6.39
 -13  -2 -14  104.17    6.71
 -13  -2  -8  305.61    7.78
 -13  -2  -7  537.37    7.44
 -12 -11   7   30.64    2.26
 -12  -4 -21   -2.96    7.92
 -12  -3 -19    3.84    7.48
 -12  -3  -2  364.73    5.40
 -12  -2 -17   64.02    6.51
 -12  -2 -16   45.91    7.46
 -12  -2  -5  197.49    6.71
 -12  -1 -12   58.48    5.25
 -12  -1 -11   19.43    4.93
 -12  -1 -10   68.27    5.03
 -12  -1  -9   -4.95    4.66
 -11  -5   2  310.67    4.61
 -11  -4 -22    6.12    8.26
 -11  -3  -1  611.04    5.89
 -11  -2 -18   28.94    7.52
 -11  -2  -3 1080.91    7.77
 -11  -1 -15   18.68    5.73
 -11  -1  -7  101.31    6.02
 -11  -1  -6   17.29    4.17
 -10  -7   5  100.97    2.03
 -10  -6   4   49.49    2.04
 -10  -4 -23    1.52    6.50
 -10  -3 -21  -11.99    7.65
 -10  -3   0  213.47    3.70
 -10  -2 -19    3.03    7.24
 -10  -2  -2  165.71    3.92
 -10  -1 -17   25.03    5.66
 -10   0 -12  190.05    6.06
 -10   0 -11   -4.24    4.34
 -10   0 -10  333.10    6.17
 -10   0  -9    9.73    4.30
  -9  -3 -22    2.12    8.55
  -9  -2  -1  147.13    3.36
  -9  -1 -18  152.83    7.90
  -9  -1  -3   41.20    3.69
  -9   0 -15    1.95    4.93
  -9   0 -14  227.75    7.67
  -9   0  -7   15.25    5.57
  -8  -7   6  131.71    1.83
  -8  -5   4   73.75    2.04
  -8  -3 -23    2.77    6.03
  -8  -1 -19   16.33    7.39
  -8  -1  -2   45.13    2.89
  -8   0  -5   -1.49    3.05
  -7  -3   2  468.80    3.53
  -7   0 -18   33.04    5.32
  -7   1 -14   37.93    4.86
  -7   1  -9   89.38    5.25
  -7   1  -8    2.54    3.59
  -6  -3 -24    6.47    6.83
  -6   1 -15   81.81    6.06
  -6   1  -6  711.08    5.48
  -5 -21  14   -6.59    2.46
  -5  -2 -23    8.81    6.27
  -5  -1   0 1611.61    5.30
  -5   0 -19  -10.87    6.12
  -5   0  -2 3558.85    8.61
  -5   1  -5   31.24    2.66
  -4 -20  14   10.68    2.94
  -4  -1 -22    5.69    4.90
  -4   0 -20   47.45    5.19
  -4   1 -17   12.46    5.02
  -4   1  -4 1832.89    6.58
  -4   2 -13   57.94    4.02
  -4   2 -12  249.69    4.82
  -4   2 -10   51.75    4.34
  -4   2  -9   76.53    3.07
  -3 -16  13   12.94    2.86
  -3  -6   7  472.42    2.13
  -2  -2 -24   17.49    5.57
  -2   0 -21    2.25    4.11
  -2   2 -15   -5.13    4.11
  -1 -23  15    7.01    3.70
  -1 -13  12   85.18    3.48
  -1 -11  11   20.17    2.58
  -1  -2   3  451.01    1.45
  -1  -1 -23   10.81    4.12
  -1   0 -21    6.20    4.88
  -1   1 -19    4.40    4.73
  -1   2 -16   55.39    3.41
   0 -22  15    3.14    4.18
   0 -18  14   88.85    4.42
   0 -15  13  -10.16    3.82
   0  -1 -23    1.89    4.87
   0   1 -19   -1.59    4.35
   0   2 -16    4.71    4.16
   1 -22  15    9.56    4.48
   2 -22  15    7.52    4.86
   3  -1   2 1402.22    4.72
   4  -9  10   17.26    4.57
   4  -1   2   31.61    3.23
   5 -22  15   -0.74    5.51
   5 -15  13   30.35    4.37
   5  -9  10   34.00    4.52
   6 -22  15   -5.80    6.17
   6 -18  14   71.54    5.89
   6 -15  13  110.38    6.00
   6 -13  12  280.44    5.66
   6 -11  11   22.53    3.85
   6  -1 -23    5.78    2.86
   6   0   0 1540.31    5.80
   6   2 -16   56.80    2.07
   7 -18  14   -1.37    5.61
   7 -13  12   18.61    5.16
   7 -11  11   61.49    5.92
   7  -8   9   62.38    4.01
   7  -2   3   60.02    3.05
   8 -19  14    6.16    4.99
   8 -16  13    6.64    4.81
   8  -7   8  283.90    5.07
   8  -3   4   46.32    3.59
   9 -20  14   28.55    5.92
   9 -19  14    1.21    6.68
   9 -16  13   -1.95    6.68
   9 -14  12   68.23    4.68
   9 -10  10   70.63    4.83
   9  -6   7   37.53    4.09
   9  -5   6  209.53    4.80
   9  -4   5   26.73    3.81
   9  -1   1  335.99    5.04
   9   0  -1   -1.94    2.38
  10 -20  14   25.42    7.65
  10 -17  13   -2.77    5.28
  10 -14  12    5.25    6.01
  10 -12  11   63.06    6.08
  10  -9   9   44.87    4.78
  10  -2   2   93.00    4.02
  10   1  -4  564.97    4.63
  10   2  -9   81.21    1.80
  11 -21  14   13.58    7.10
  11 -17  13   28.10    6.89
  11 -15  12    2.32    4.99
  11 -11  10    5.50    4.98
  11  -8   8  169.65    5.17
  11  -3   3   11.19    3.94
  11  -2 -23    1.06    1.30
  11  -1   0   61.84    3.29
  11   0  -2   78.02    3.97
  11   1  -5   96.26    2.70
  12 -18  13   -9.29    7.80
  12 -13  11   10.34    6.73
  12  -7   7   71.58    5.81
  12  -6   6   16.40    4.22
  12  -5   5   18.40    4.11
  12  -4   4  217.82    6.54
  12  -2   1   50.58    3.88
  12   0  -3   -2.13    2.45
  12   1  -6  120.16    3.67
  13 -20  13    7.62    6.23
  13 -19  13    0.80    8.52
  13 -16  12   64.45    6.97
  13 -14  11   39.93    5.49
  13 -12  10    1.75    5.17
  13 -10   9   35.18    6.30
  13  -9   8   78.49    4.94
  13  -3   2  586.76    6.70
  13   1 -14    4.12    1.55
  13   1  -8   36.14    2.86
  14 -20  13   -6.43    7.48
  14 -17  12   15.24    7.13
  14 -15  11    2.13    5.29
  14 -11   9    0.70    5.28
  14  -8   7   57.65    6.40
  14  -7   6  123.78    5.23
  14  -6   5   88.22    4.90
  14  -5   4   24.50    4.33
  14  -4   3   52.29    6.19
  14  -2   0  841.52    8.56
  14  -1  -2   37.99    5.25
  14   0  -5   -2.27    3.10
  15 -18  12   -5.95    7.38
  15 -13  10   24.39    6.93
  15 -10   8  142.16    5.69
  15  -4   2    7.39    4.36
  15  -3   1  101.16    5.92
  15  -2  -1   63.50    4.26
  15  -1  -3  130.83    5.64
  15   0 -15   -4.52    1.59
  16 -20  12   -8.11    6.90
  16 -19  12   42.93    7.49
  16 -17  11   19.87    6.01
  16 -14  10   13.82    7.80
  16 -12   9   31.59    7.27
  16 -11   8   83.67    6.09
  16  -8   6  423.89    8.68
  16  -7   5   43.52    4.79
  16  -6   4  262.65    6.20
  16  -5   3  188.97    7.25
  16  -3   0    3.55    4.43
  16  -2  -2   96.51    4.81
  16   0 -12   79.94    3.19
  16   0 -11    2.49    3.07
  16   0 -10   25.54    3.52
  16   0  -9   -4.56    3.40
  17 -18  11    1.48    6.02
  17 -15  10   10.35    7.94
  17 -13   9   -1.95    7.69
  17 -10   7   11.81    5.22
  17  -9   6    4.33    5.28
  17  -5   2   63.99    5.01
  17  -3  -1   53.34    5.01
  17  -2  -3   36.59    5.61
  17  -1  -6  171.58    5.85
  18 -19  11    1.58    7.78
  18 -17  10   38.87    6.37
  18 -16  10   31.86    7.93
  18 -14   9   43.27    8.52
  18 -11   7   19.88    5.73
  18  -5   1   14.11    5.05
  18  -3  -2   -5.99    6.42
  18  -2 -17    3.29    2.29
  18  -2  -5   39.10    4.24
  18  -1 -12    7.17    3.29
  18  -1 -11   12.88    3.80
  18  -1 -10   45.70    4.41
  18  -1  -9    1.79    4.29
  19 -18  10   15.02    7.36
  19 -15   9   -1.79    7.82
  19 -12   7    6.21    5.91
  19  -9   5    8.82    8.01
  19  -8   4   79.46    7.47
  19  -7   3  172.64    8.04
  19  -5   0   56.73    5.50
  19  -3 -18    6.30    1.96
  19  -2 -15   12.69    2.71
  19  -2  -7   72.43    4.17
  20 -17   9   -1.44    6.63
  20 -15   8   40.90    6.94
  20 -13   7    1.79    6.35
  20 -10   5   28.96    7.62
  20  -9   4   11.37    5.92
  20  -8   3    4.08    5.86
  20  -7   2   26.70    5.80
  20  -5  -1    8.44    5.52
  20  -4  -3   11.51    4.97
  20  -3 -16    9.97    2.84
  20  -3  -6   67.14    4.50
  20  -3  -5   24.34    5.77
  21 -16   8   28.07    6.99
  21 -14   7   -5.06    7.95
  21 -11   5   35.24    8.21
  21 -10   4   12.46    6.66
  21  -9   3   49.64    6.45
  21  -8   2   -4.19    6.16
  21  -7   1  -11.12    7.39
  21  -5  -2  171.75    7.89
  21  -4  -5   22.61    5.01
  21  -3 -13   -1.18    3.64
  21  -3 -12   34.18    4.50
  21  -3 -11   10.03    3.74
  21  -3 -10   26.64    4.05
  21  -3  -9   21.47    5.31
  21  -3  -8    8.63    5.42
  22 -16   7   14.13    7.30
  22 -15   7   -6.68    8.43
  22 -14   6   36.87    7.20
  22 -12   5   13.84    8.47
  22 -11   4   -8.97    6.75
  22 -10   3   58.34    7.55
  22  -9   2   19.85    6.39
  22  -8   1   14.06    6.33
  22  -7   0   51.76    8.01
  22  -6  -2   34.04    5.91
  22  -5  -4   23.11    6.72
  22  -4 -14   17.98    3.94
  22  -4  -8    6.69    4.78
  22  -4  -7    2.07    6.28
  23 -15   6   10.13    9.10
  23 -14   5   12.01    7.08
  23 -12   4   25.42    8.60
  23 -11   3   -8.56    7.26
  23 -10   2    9.70    6.94
  23  -9   1   -3.98    6.84
  23  -8   0   22.62    8.50
  23  -7  -2  113.56    7.05
  23  -6  -4   84.70    6.75
  23  -5  -7  -12.74    5.39
  23  -5  -6   32.49    7.09
  24 -15   5   11.25    7.97
  24 -12   3   15.78    8.86
  24 -11   2    8.97    9.01
  24 -10   1    5.75    8.81
  24  -9   0   -0.27    8.30
  24  -8  -2   16.20    6.59
  24  -7  -4   51.77    6.62
  24  -6  -7   17.90    6.13
  24  -6  -6  130.27    9.47
  25 -14   3    2.23    8.11
  25 -11   1    6.65    9.44
  25 -10  -1    3.92    7.19
  25  -9  -2   32.59    7.58
  25  -8  -4   18.02    7.13
  25  -7  -7   19.00    6.94
  25  -7  -6   75.61    9.31
  26 -13   1   -1.18    8.59
  26 -12   0   17.43    8.56
  26 -11  -1   17.96    8.46
  26 -10  -2   54.34    9.33
  26  -9  -4   17.20    9.11
  26  -8  -7   -0.37    6.76
  26  -8  -6   32.95    8.70
 -24 -15  -6   14.76    7.39
 -23 -16  -2    2.98    6.32
 -23 -15  -3    9.09    6.11
 -23 -14  -5  -14.76    8.28
 -23 -13  -8   45.37    9.50
 -23 -13  -7   23.74    7.32
 -23 -13  -6    2.56    7.03
 -22 -19   2   10.26    4.76
 -22 -16   0   99.62    6.31
 -22 -15  -1    5.49    7.06
 -22 -14  -2    8.11    5.74
 -22 -13  -3    4.47    6.31
 -22 -12  -6    9.74    8.68
 -22 -12  -5    4.06    6.46
 -22 -11 -13   -2.09    8.39
 -22 -11 -12   24.89   10.77
 -22 -11 -11   14.60   10.46
 -22 -11 -10   26.61    9.90
 -22 -11  -9   -3.28    9.86
 -22 -11  -8   41.09    7.68
 -22 -11  -7   39.67    7.54
 -21 -17   2   87.89    6.10
 -21 -15   1   -3.67    4.77
 -21 -14   0   10.14    5.18
 -21 -13  -1   10.71    5.65
 -21 -11  -4   93.49    6.62
 -21 -10 -15   12.07    8.54
 -21 -10 -14   36.07   10.48
 -21 -10 -13   27.39   10.00
 -21 -10  -7   62.56    9.24
 -21 -10  -6   54.82    7.52
 -20 -20   5   -8.98    3.81
 -20 -18   4   10.58    4.72
 -20 -16   3    1.24    4.27
 -20 -15   2   -1.19    5.34
 -20 -11  -2   99.91    7.91
 -20 -10  -3   84.40    6.37
 -20  -9 -16   -6.17    7.95
 -20  -9 -15    2.27    9.90
 -20  -9  -6   12.50    8.25
 -20  -9  -5    2.49    6.11
 -20  -8 -12    6.31    7.64
 -20  -8 -11    6.84    7.73
 -20  -8 -10    3.86    7.56
 -20  -8  -9    2.94    6.74
 -19 -20   6   31.27    4.43
 -19 -18   5    0.69    4.54
 -19 -16   4    7.10    4.84
 -19 -13   2   42.97    4.51
 -19 -12   1    0.90    5.91
 -19 -11   0   61.07    4.91
 -19  -9  -3   15.48    5.59
 -19  -8 -16   18.94    7.62
 -19  -8 -15   12.33    9.44
 -19  -8  -5  115.65    6.97
 -19  -7 -13    2.75    7.20
 -19  -7 -12   14.18    7.59
 -19  -7 -11   55.10    7.34
 -19  -7 -10   33.83    7.13
 -19  -7  -9   35.18    6.75
 -19  -7  -8   60.32    7.21
 -18 -14   4   27.87    3.81
 -18 -13   3    1.69    4.80
 -18 -10   0  211.20    6.91
 -18  -9  -1  125.47    5.58
 -18  -8 -18   16.63    9.25
 -18  -8  -3  193.68    7.89
 -18  -7 -16   18.02    7.53
 -18  -7  -5   95.76    6.82
 -18  -6 -13    8.38    7.25
 -18  -6 -12   63.22    7.36
 -18  -6 -11   -6.43    6.52
 -18  -6 -10    6.87    6.65
 -18  -6  -9   14.98    6.53
 -18  -6  -8   94.53    6.76
 -17 -21   8   -4.48    3.22
 -17 -18   7    6.46    3.51
 -17 -16   6   87.21    4.22
 -17 -14   5   17.49    3.20
 -17  -8  -1   57.31    6.39
 -17  -7 -18   15.77   10.23
 -17  -7  -3    2.19    6.73
 -17  -6 -16   20.79    7.28
 -17  -6  -5   78.92    6.11
 -17  -5 -13   -7.90    6.56
 -17  -5 -12  115.09    7.39
 -17  -5 -11    4.04    6.73
 -17  -5 -10   34.73    6.52
 -17  -5  -9   10.90    6.13
 -16 -22   9    2.83    2.93
 -16 -16   7   -4.30    3.23
 -16  -7 -20   17.84    7.66
 -16  -7  -1   66.89    5.06
 -16  -6 -18   -7.40    8.78
 -16  -6  -3  154.25    7.51
 -16  -5 -16   13.47    7.05
 -16  -5 -15   28.20    8.26
 -16  -5  -5  204.09    6.39
 -16  -4 -11   26.19    6.42
 -16  -4 -10   28.20    6.42
 -15 -13   6    3.29    3.36
 -15  -6 -20    2.02    6.88
 -15  -6  -1  383.12    6.31
 -15  -5 -18   24.95    6.78
 -15  -5  -3  215.47    5.65
 -15  -4 -15    7.68    6.46
 -15  -4  -6  104.57    5.40
 -14 -15   8  121.24    2.99
 -14  -6 -21    4.84    7.94
 -14  -6   0  267.67    6.10
 -14  -5 -19   -7.33    8.15
 -14  -4 -17    5.01    9.00
 -14  -4  -4    9.42    5.89
 -14  -3 -14   45.97    6.49
 -14  -3 -13  105.44    8.64
 -14  -3  -8  204.34    7.63
 -14  -3  -7  154.45    5.81
 -13  -5 -21    0.09    6.56
 -13  -5   0  486.36    5.84
 -13  -4 -19   -0.29    6.52
 -13  -4  -2   57.78    4.19
 -13  -3 -17   41.85    6.38
 -13  -3 -16   78.98    7.96
 -13  -2 -13   60.16    5.63
 -13  -2 -12  171.35    7.01
 -13  -2 -11   19.52    5.02
 -13  -2 -10   63.89    5.26
 -13  -2  -9  182.15    5.98
 -12 -20  11    9.38    1.64
 -12  -5 -22    4.26    6.81
 -12  -5   1   81.07    3.66
 -12  -4 -20   15.31    8.46
 -12  -3 -18   -4.88    7.80
 -12  -3  -3   86.89    5.95
 -12  -2 -15   29.53    7.35
 -12  -2  -6  258.25    6.84
 -11  -9   6   38.27    2.20
 -11  -6   3   30.73    3.24
 -11  -2 -17   26.16    7.12
 -11  -2  -4  655.53    8.00
 -11  -1 -14   68.67    5.74
 -11  -1 -13   61.33    5.68
 -11  -1 -12   62.55    7.04
 -11  -1 -11   18.19    6.14
 -11  -1  -9   42.13    6.44
 -11  -1  -8   84.25    4.88
 -10  -4 -22   -1.50    8.87
 -10  -1 -16   40.95    5.76
 -10  -1  -5   71.60    4.37
  -9  -4   2  185.71    2.80
  -9  -1  -4  165.74    5.42
  -9   0 -13    5.54    4.93
  -9   0 -12  123.76    6.70
  -9   0 -11   -1.55    5.56
  -9   0  -9   -6.40    5.82
  -9   0  -8  587.04    6.73
  -8 -11   9  149.05    1.06
  -8  -6   5  207.52    2.22
  -8  -3 -22    1.65    7.84
  -8   0 -15   -1.86    6.16
  -8   0  -6   89.24    5.44
  -7 -19  13    3.26    1.61
  -7 -16  12    2.21    1.29
  -7  -2 -21    2.76    7.12
  -7   0  -4  117.52    3.37
  -7   1 -12   82.12    4.68
  -7   1 -11   15.75    3.86
  -7   1 -10   18.11    3.87
  -6 -22  14   16.32    2.06
  -6 -18  13    1.55    1.66
  -6  -2   1  145.49    2.31
  -6   0 -18  201.76    6.05
  -6   0  -3    1.49    2.57
  -6   1 -14  108.95    5.10
  -6   1  -7  133.85    4.05
  -5 -17  13    1.03    2.07
  -5  -3   3   52.08    1.30
  -5   1 -15   24.27    5.46
  -4 -14  12    4.40    1.92
  -4 -12  11    1.62    1.61
  -4  -2 -23    2.11    5.86
  -4  -2   2 2326.91    4.41
  -4   0 -19   -3.43    5.95
  -3  -4   5    7.05    0.43
  -3  -1 -22    7.71    4.68
  -3   1 -17   10.30    4.81
  -3   2 -13   35.55    3.64
  -3   2 -12   54.14    4.48
  -3   2  -9   45.11    3.57
  -3   2  -8  210.12    3.35
  -2 -13  12  216.64    3.45
  -2  -1 -22   14.48    5.59
  -2   1 -18    3.46    4.14
  -2   1  -3  439.66    2.83
  -2   2 -14   68.65    4.53
  -2   2  -7   -6.02    2.78
  -1 -22  15    3.86    3.61
  -1 -18  14    9.15    3.54
  -1  -2 -24    5.34    5.22
  -1   2 -15   12.40    3.01
  -1   2  -6  224.49    2.51
   0  -9  10  385.56    4.12
   0  -2 -24   15.66    4.94
   0   0 -21    5.32    4.96
   1 -21  15   -4.66    4.98
   1 -17  14   32.73    4.23
   1  -9  10  258.74    3.63
   1  -1 -23   -0.96    3.72
   1   0 -21    3.34    4.56
   2 -21  15   -2.55    4.83
   2 -17  14   11.12    4.27
   2  -1   2  752.76    3.18
   2   1 -19    4.84    3.63
   3 -17  14   24.07    4.83
   3 -12  12   87.28    4.37
   3  -4   6  950.85    5.59
   4 -21  15    7.50    4.46
   4 -17  14   29.33    4.12
   4 -12  12   30.38    4.89
   4  -5   7  229.87    4.22
   4  -4   6 1169.19    6.48
   5 -21  15   19.53    4.49
   5 -17  14   46.09    5.44
   5 -12  12  155.00    5.42
   5  -5   7    0.49    3.64
   5  -1   2  893.97    4.87
   5   1 -19   16.95    2.82
   5   2 -16   92.11    2.71
   6 -21  15   11.14    5.62
   6 -17  14    0.18    6.19
   6  -9  10   51.36    3.95
   6  -1   2   56.83    3.70
   6   0 -21   -6.47    2.64
   6   1  -2   42.78    1.79
   6   2  -5   99.70    1.39
   7 -22  15    9.50    5.30
   7 -21  15    0.75    6.23
   7 -15  13   40.04    4.61
   7  -9  10   32.03    5.37
   7   0   0 2275.62    7.45
   8 -18  14   52.47    5.72
   8 -15  13   25.74    6.22
   8 -13  12  121.96    5.10
   8 -11  11   43.18    4.74
   8  -8   9   10.72    3.96
   8  -2   3  274.53    4.42
   8   2  -6  118.23    1.99
   9 -18  14   18.04    6.29
   9 -13  12    0.70    6.13
   9 -11  11   94.54    6.43
   9  -8   9   16.16    5.67
   9  -7   8   58.90    4.18
   9  -3   4  810.38    6.71
   9  -1 -22   24.63    2.22
   9   1  -3   43.43    2.96
   9   2  -7   25.73    1.71
  10 -19  14   72.32    7.60
  10 -16  13    4.48    5.11
  10 -10  10   17.55    4.72
  10  -7   8  294.91    6.57
  10  -6   7  197.08    4.97
  10  -5   6  503.39    6.24
  10  -4   5  165.84    4.76
  10   0  -1   -6.76    3.56
  10   2 -13   88.43    0.95
  10   2  -8   41.20    1.79
  11 -20  14   53.18    6.26
  11 -14  12   39.96    5.02
  11 -12  11   11.46    4.73
  11  -9   9  108.35    5.12
  11  -2   2  756.29    6.67
  12 -17  13   -2.36    7.85
  12 -15  12   68.87    5.73
  12 -11  10   23.73    4.85
  12  -8   8  164.31    5.31
  12  -3   3   70.47    4.36
  13 -18  13    1.83    7.35
  13 -15  12   -0.83    6.48
  13  -7   7  161.97    6.87
  13  -6   6   34.12    4.46
  13  -5   5   34.81    5.57
  13  -2   1  446.74    6.05
  13  -1  -1   20.62    3.50
  13   0  -3   -3.07    4.15
  13   1  -7   24.87    3.12
  14 -19  13    8.61    7.51
  14 -16  12   10.08    6.75
  14 -14  11  -11.80    5.19
  14 -12  10   18.54    5.14
  14  -9   8  276.95    6.33
  14  -3   2   39.37    5.60
  14   0 -17   -3.12    1.08
  14   0  -4  132.43    4.69
  14   1 -11   15.63    2.14
  14   1 -10  155.78    3.28
  15 -17  12   28.94    7.46
  15 -15  11    0.27    5.37
  15 -11   9   34.68    5.56
  15  -8   7   20.59    6.55
  15  -7   6  186.65    5.70
  15  -6   5  239.26    5.92
  15  -5   4  409.71    7.65
  15   0  -6   31.21    3.19
  16 -18  12    0.31    7.18
  16 -16  11    0.95    5.77
  16 -10   8   56.77    6.87
  16  -9   7    3.74    5.23
  16  -4   2   38.63    4.61
  16  -1  -4   66.80    4.13
  16   0 -13    4.01    2.51
  16   0  -8   69.69    3.91
  17 -17  11  -10.60    6.03
  17 -14  10   58.88    7.91
  17 -11   8   27.60    5.72
  17  -7   5   43.69    6.65
  17  -6   4  242.16    7.45
  17  -4   1    8.42    4.43
  17  -1 -16   67.83    2.51
  17  -1  -5   41.14    4.99
  18 -18  11    5.29    6.51
  18 -15  10   13.99    7.50
  18 -13   9  -13.43    7.37
  18 -12   8    7.80    5.49
  18 -10   7   14.57    7.13
  18  -9   6  127.02    6.37
  18  -8   5   92.14    6.11
  18  -7   4  159.69    5.86
  18  -6   3   50.66    5.13
  18  -5   2   -5.37    6.13
  18  -4   0  415.22    7.27
  18  -2  -4  102.31    4.83
  18  -1 -13   19.74    3.00
  18  -1  -8  121.70    4.99
  19 -17  10   -3.42    6.49
  19 -13   8   27.14    6.53
  19 -11   7   22.15    7.41
  19 -10   6   33.81    5.81
  19  -6   2   22.96    5.06
  19  -5   1    1.45    6.58
  19  -4  -1   -3.77    5.00
  19  -3  -3   19.69    4.69
  19  -2  -6   23.43    4.09
  20 -16   9   14.81    6.72
  20 -14   8    7.64    6.58
  20 -12   7   -5.97    7.76
  20 -11   6   42.28    6.59
  20  -6   1   23.79    5.82
  20  -5   0    5.73    7.32
  20  -4  -2  160.60    6.05
  20  -2 -12   35.71    3.93
  20  -2 -11   -4.43    4.19
  20  -2 -10   44.88    4.81
  20  -2  -9   37.93    5.38
  21 -17   9    6.80    8.49
  21 -15   8   13.60    6.91
  21 -13   7   -5.86    8.04
  21 -12   6   62.20    6.66
  21  -9   4   38.04    7.98
  21  -8   3  -16.33    7.44
  21  -6   0    2.86    5.66
  21  -4  -4    5.11    4.59
  21  -3 -14   -3.40    3.28
  21  -3  -7   -3.70    5.72
  22 -16   8   11.86    8.65
  22 -13   6   51.65    6.90
  22 -10   4   21.36    8.65
  22  -9   3    3.34    8.64
  22  -8   2   56.11    8.20
  22  -6  -1   14.60    7.15
  22  -5  -3   22.73    6.95
  22  -4 -15   14.62    3.56
  22  -4  -6    9.32    5.53
  23 -16   7    4.07    7.09
  23 -14   6   21.84    8.82
  23 -13   5  -10.52    7.01
  23 -11   4   38.11    8.80
  23 -10   3   -1.35    8.75
  23  -9   2   53.73    8.79
  23  -7  -1   -7.85    6.41
  23  -6  -3    8.96    5.72
  23  -5  -5    1.28    6.94
  24 -14   5   11.99    7.82
  24 -13   4    3.54    7.49
  24  -8  -1    6.24    7.01
  24  -7  -3   32.12    6.10
  24  -6  -5   13.05    6.22
  24  -5 -12   -2.01    5.02
  24  -5 -11    2.16    5.17
  24  -5 -10    1.10    5.51
  24  -5  -9   25.04    5.93
  25 -14   4   17.66    7.78
  25 -13   3   -6.80    7.83
  25 -12   2  -17.13    7.68
  25 -10   0   -1.61    7.01
  25  -9  -1   12.60    7.11
  25  -8  -3   13.90    6.87
  25  -7  -5   -0.94    6.54
  25  -6 -11   14.71    6.06
  25  -6 -10    1.27    6.17
  25  -6  -9    9.52    6.68
  25  -6  -8   10.02    7.43
  26 -13   2   16.25    8.36
  26 -12   1   10.26    8.63
  26 -11   0    6.96    7.87
  26 -10  -1   32.28    9.23
  26  -9  -3  -17.32    7.11
  26  -8  -5   -0.77    8.64
  26  -7  -9    9.14    7.04
  26  -7  -8   42.84    7.75
  27 -10  -4    5.97    8.35
  27 -10  -3    2.37    9.75
  27  -9  -5   14.30    9.15
 -23 -17  -2   37.08    7.69
 -23 -16  -3    7.00    6.82
 -23 -15  -5    8.74    8.43
 -23 -15  -4    9.33    6.73
 -23 -14  -8   15.16    9.41
 -23 -14  -7   -4.29    8.62
 -23 -14  -6    6.47    6.86
 -23 -13 -10   -9.38    8.63
 -23 -13  -9   26.90    8.18
 -22 -18   1    2.17    5.16
 -22 -17   0   28.86    6.92
 -22 -16  -1   16.46    8.14
 -22 -15  -2   -1.31    8.28
 -22 -14  -3   14.26    6.28
 -22 -13  -5   11.23    9.19
 -22 -13  -4   32.24    6.49
 -22 -12 -12   13.03    9.98
 -22 -12 -11    1.22   10.16
 -22 -12 -10    8.44    9.90
 -22 -12  -9   18.54    9.69
 -22 -12  -8   12.11    9.04
 -22 -12  -7    1.17    7.27
 -21 -19   3   -5.89    4.27
 -21 -16   1   -5.55    5.67
 -21 -15   0   29.78    7.19
 -21 -14  -1   17.61    7.74
 -21 -13  -2   21.74    7.26
 -21 -12  -4   88.70    8.39
 -21 -12  -3   11.93    6.06
 -21 -11 -14    2.68    9.95
 -21 -11  -6   27.37    9.71
 -21 -11  -5   15.65    6.78
 -21 -10 -12   32.41    8.19
 -21 -10 -11    2.18    7.84
 -21 -10 -10   53.88    8.23
 -21 -10  -9    6.27    7.78
 -21 -10  -8   97.19    8.17
 -20 -19   4   29.76    4.94
 -20 -17   3   -3.09    5.05
 -20 -14   1   12.79    4.76
 -20 -13   0   -1.34    5.16
 -20 -12  -1   -4.28    5.26
 -20 -11  -3    0.95    7.19
 -20 -10 -16    1.88    7.84
 -20 -10  -5   -4.04    8.63
 -20 -10  -4   68.71    6.38
 -20  -9 -14   12.15    8.49
 -20  -9 -13   12.41    7.71
 -20  -9 -12   78.60   10.11
 -20  -9 -11    0.32   10.33
 -20  -9 -10   45.92    9.84
 -20  -9  -9   -7.69    9.61
 -20  -9  -8   62.35    8.04
 -20  -9  -7    7.21    6.74
 -19 -21   6   11.07    4.70
 -19 -15   3   45.09    5.67
 -19 -11  -1   16.52    6.14
 -19 -10  -2    9.13    5.43
 -19  -9 -17    6.56    7.81
 -19  -9 -16    5.22    9.10
 -19  -9  -4   39.90    6.14
 -19  -8 -14   18.74    7.49
 -19  -8 -13   45.07    9.31
 -19  -8  -8   40.79    8.99
 -19  -8  -7  127.46    7.36
 -19  -8  -6   66.77    6.83
 -18 -21   7   -1.29    3.59
 -18 -18   6   17.93    3.30
 -18 -16   5    9.61    3.56
 -18 -12   2  111.02    5.08
 -18 -11   1    4.86    3.93
 -18  -9  -2   39.34    6.40
 -18  -8 -17    8.41    7.57
 -18  -8  -4   37.04    7.20
 -18  -7 -15   16.72    7.70
 -18  -7 -14   14.66    7.46
 -18  -7 -13   44.29    9.14
 -18  -7  -7   87.71    8.75
 -18  -7  -6  183.34    7.35
 -17 -13   4    4.54    4.27
 -17 -12   3    9.92    4.78
 -17 -10   1   28.86    5.04
 -17  -9   0   -0.03    4.30
 -17  -8 -19   -2.91    7.70
 -17  -7 -17    6.85    7.55
 -17  -6 -15    1.67    7.05
 -17  -6 -14   13.83    7.26
 -17  -6 -13   -4.04    8.86
 -17  -6  -7   16.77    7.62
 -17  -6  -6  354.03    7.75
 -16 -19   8    5.55    2.98
 -16 -13   5   48.50    4.15
 -16  -8   0   86.89    4.83
 -16  -7 -19   12.08    7.15
 -16  -6 -17   16.80    7.28
 -16  -6  -4  267.83    8.03
 -16  -5 -14   31.55    6.76
 -16  -5 -13   48.09    9.51
 -16  -5  -7  165.50    6.51
 -16  -5  -6   92.88    5.94
 -15 -17   8   11.71    2.71
 -15 -15   7   -5.81    2.81
 -15  -7   0   -0.41    4.09
 -15  -6 -19   -1.78    6.70
 -15  -6  -2  216.17    6.97
 -15  -5 -17   34.32    6.99
 -15  -5 -16   37.22    8.32
 -15  -5  -4  382.89    6.77
 -15  -4 -14   69.91    6.84
 -15  -4 -13   53.87    6.63
 -15  -4 -12   90.02    8.18
 -15  -4 -11  157.51    8.44
 -15  -4 -10  249.86    8.69
 -15  -4  -9    9.26    7.28
 -15  -4  -8  170.99    6.32
 -15  -4  -7   51.76    5.34
 -14 -12   6  313.38    4.60
 -14  -7   1  187.56    5.45
 -14  -6 -20   19.40    8.94
 -14  -5 -18  -15.20    7.94
 -14  -5  -2   -3.05    4.09
 -14  -4 -16    0.73    6.24
 -14  -3 -12  182.68    7.25
 -14  -3 -11   21.32    5.45
 -14  -3 -10  197.85    6.52
 -14  -3  -9   17.14    5.08
 -13 -16   9   12.54    1.94
 -13 -14   8   48.54    2.55
 -13 -11   6  105.10    3.22
 -13  -6   1  228.37    4.56
 -13  -5 -20   17.78    6.68
 -13  -4 -18    7.53    6.27
 -13  -3 -15    7.97    5.97
 -13  -3  -6    6.10    6.03
 -13  -3  -5  105.68    4.97
 -12 -17  10  138.06    2.27
 -12 -10   6  230.94    3.42
 -12  -6   2  430.42    4.84
 -12  -5 -21   -8.81    7.76
 -12  -4 -19    0.00    7.90
 -12  -4  -1   34.12    3.69
 -12  -3 -17    4.91    7.47
 -12  -2 -14   97.01    6.55
 -12  -2 -13   85.18    7.45
 -12  -2  -8   -2.47    6.03
 -12  -2  -7  251.09    5.86
 -11  -8   5  164.47    2.99
 -11  -7   4  342.93    3.57
 -11  -5 -22    4.51    8.33
 -11  -4   0  187.67    4.12
 -11  -3 -19   -4.39    6.21
 -11  -3  -2  199.98    5.58
 -11  -2 -16   53.15    6.14
 -11  -1 -10  129.07    5.37
 -10 -11   8   51.85    1.75
 -10  -5 -23    7.03    6.39
 -10  -4   1  134.28    3.05
 -10  -3 -20   -1.92    5.96
 -10  -2 -18   78.94    6.36
 -10  -2  -3  159.20    4.48
 -10  -1  -7   40.70    5.57
 -10  -1  -6  530.61    6.40
  -9  -4 -22    8.06    7.75
  -9  -3 -21   12.88    6.17
  -9  -2 -19   39.48    5.98
  -9   0 -10  247.24    5.63
  -8  -3   1   40.23    2.87
  -8  -2 -20  118.00    6.74
  -8  -1  -3  111.57    3.37
  -8   0 -14   15.25    4.97
  -8   0 -13   -1.80    6.21
  -8   0  -7    3.30    5.03
  -7  -3 -22   70.27    7.86
  -7  -1  -2  861.71    5.95
  -7   0 -16   18.03    4.73
  -7   0  -5    1.37    3.98
  -6  -3 -23    3.11    5.66
  -6  -1  -1   39.66    2.45
  -6   0 -17   -7.37    4.38
  -6   1 -12   77.86    4.49
  -6   1 -10  439.72    6.50
  -6   1  -9    9.31    4.62
  -6   1  -8 1736.76    8.81
  -5  -1 -20   38.93    7.36
  -5   0 -18   73.50    4.87
  -5   1 -14  307.57    7.28
  -5   1  -6  508.61    4.64
  -4  -3 -24   33.68    5.39
  -4  -1 -21   25.96    4.94
  -4   1  -5   82.34    3.57
  -3 -23  15   16.80    3.47
  -3   1  -4 4018.52    8.92
  -3   2 -11   13.29    3.15
  -3   2 -10   34.27    3.21
  -2 -22  15    0.62    3.35
  -2 -15  13   58.01    3.11
  -2 -11  11  129.95    2.78
  -2  -8   9  118.18    2.26
  -2   2 -13   -2.45    3.14
  -2   2  -8  195.61    3.69
  -1  -1 -22   83.00    5.90
  -1   1 -18   42.23    4.12
   0 -21  15   -4.30    3.24
   0 -17  14   40.79    3.95
   0   1 -18  203.62    5.70
   0   2 -15    1.04    2.62
   1 -20  15    3.94    4.48
   1 -14  13   55.42    4.37
   1 -12  12   80.62    3.94
   1  -5   7   -5.11    2.38
   1  -2 -24    5.67    4.82
   1  -1   2 7167.78    7.33
   2 -20  15   19.06    4.58
   2 -14  13   23.57    3.59
   2 -12  12   26.60    3.04
   2 -10  11   15.18    3.56
   2  -6   8   40.95    3.21
   2  -4   6 2569.82    7.45
   2  -2 -24    3.18    4.46
   2   0 -21    6.11    4.10
   3 -14  13  104.79    4.30
   3 -10  11   87.35    4.32
   3  -6   8 1051.33    5.98
   3  -3   5    0.90    2.99
   4 -20  15  -10.36    4.09
   4 -14  13    4.31    3.84
   4  -6   8  125.14    3.17
   5 -20  15    1.91    4.35
   5 -10  11    5.55    4.46
   5  -6   8  165.48    3.57
   5  -4   6 1062.50    6.15
   5  -3   5   82.54    3.83
   6 -20  15   25.41    5.57
   6 -14  13   18.79    4.06
   6 -12  12   16.43    3.76
   6 -10  11   63.23    5.73
   6  -6   8  170.01    5.00
   6  -5   7  167.11    4.04
   6  -4   6   20.24    2.90
   7 -20  15    2.59    5.84
   7 -17  14  129.24    5.67
   7 -14  13   61.35    5.88
   7 -12  12  381.76    7.07
   7  -5   7  313.11    5.95
   7  -4   6  325.77    5.68
   7  -2 -24    1.81    2.36
   7  -1   2  716.28    5.02
   7   1  -2  842.82    4.26
   8 -21  15    6.36    5.06
   8 -17  14    3.11    6.20
   8  -9  10  218.17    5.38
   8   0   0 1904.74    7.37
   9 -21  15   -5.67    6.58
   9 -15  13   -2.46    4.54
   9  -9  10   56.05    5.98
   9  -2   3  305.70    4.45
   9   0 -20   11.41    1.88
  10 -18  14   22.83    6.77
  10 -15  13   34.38    6.56
  10 -13  12   50.43    5.29
  10 -11  11   14.68    5.90
  10  -8   9   88.13    5.65
  10  -3   4  704.71    6.61
  10  -1   1  333.05    4.88
  11 -19  14   13.40    5.83
  11 -16  13    6.20    5.39
  11 -10  10   29.61    4.94
  11  -7   8   52.43    5.93
  11  -6   7    9.35    4.17
  11  -5   6   71.59    4.43
  11  -4   5   83.02    4.40
  11   1  -4  651.10    4.97
  12 -20  14   53.91    6.58
  12 -19  14   56.57    7.73
  12 -16  13   31.19    6.89
  12 -14  12    1.30    4.95
  12 -12  11   -0.14    4.95
  12 -10  10   18.36    6.25
  12  -9   9   48.00    4.92
  12  -2   2  116.68    5.88
  12  -1   0   24.10    3.59
  12   0  -2  298.30    4.54
  12   1  -5  123.55    3.15
  13 -20  14   10.96    7.70
  13 -17  13   -5.57    6.98
  13 -11  10   -2.56    5.29
  13  -9   9   25.24    6.17
  13  -8   8  178.30    5.66
  13  -4   4   17.46    4.07
  13  -3   3  144.63    6.32
  13   1  -6   15.65    3.48
  14 -18  13   16.46    6.18
  14 -15  12   32.56    7.60
  14 -13  11   15.12    6.69
  14 -11  10   54.14    6.90
  14 -10   9   -3.72    4.69
  14  -7   7  115.60    6.60
  14  -6   6   78.31    6.18
  14  -5   5  124.37    6.61
  14  -1  -1  176.03    5.78
  14   1 -12  185.20    2.88
  14   1  -9   24.09    2.79
  14   1  -8   86.79    3.33
  15 -19  13   11.35    7.83
  15 -16  12   22.79    7.10
  15 -14  11   -6.85    5.44
  15 -12  10   88.30    6.19
  15  -9   8   58.09    4.98
  15  -4   3  347.10    6.35
  15  -2   0    4.11    4.04
  15  -1  -2  208.07    4.96
  15   0  -5   -7.94    3.23
  16 -17  12   36.34    7.57
  16 -15  11    1.89    5.83
  16 -13  10   54.02    6.13
  16 -11   9    2.68    5.47
  16  -7   6  250.14    7.80
  16  -6   5  102.56    6.85
  16  -3   1   25.34    4.37
  16  -2  -1   22.62    4.45
  16  -1  -3    2.25    4.99
  16   0 -14   18.10    2.05
  16   0  -7   -4.23    2.97
  17 -19  12    6.98    6.44
  17 -18  12   88.51    8.99
  17 -16  11   13.90    5.94
  17 -12   9   -3.84    5.48
  17 -10   8   22.23    6.99
  17  -9   7    4.80    5.26
  17  -8   6  133.28    6.16
  17  -5   3   32.18    4.82
  17  -3   0  108.47    5.16
  17  -2 -19    7.99    1.51
  17  -2  -2   18.81    4.48
  18 -17  11   -0.13    6.44
  18 -11   8   32.08    5.95
  18  -4   1   16.71    6.33
  18  -3  -1   37.25    5.06
  18  -2  -3    3.51    4.48
  18  -1 -14   14.85    2.71
  18  -1  -7   22.22    3.59
  18  -1  -6  151.02    5.58
  19 -18  11    3.87    8.19
  19 -16  10   38.20    6.96
  19 -14   9    8.68    6.23
  19 -12   8    2.87    6.34
  19  -9   6   -6.18    8.05
  19  -8   5  108.96    6.20
  19  -7   4   77.95    7.38
  19  -6   3   -2.48    6.42
  19  -4   0   35.97    6.64
  19  -3  -2  211.11    6.23
  19  -2 -16    9.08    2.56
  19  -2  -5  127.41    5.03
  20 -17  10   18.92    7.39
  20 -15   9    8.50    6.32
  20 -13   8   -1.07    6.40
  20 -10   6   37.93    6.17
  20  -9   5   -7.84    5.74
  20  -8   4   44.81    6.20
  20  -7   3    1.73    5.63
  20  -6   2   88.96    7.50
  20  -4  -1   -1.76    6.50
  20  -3 -17    5.58    2.34
  20  -3  -4   12.30    4.54
  20  -2 -13   27.66    3.69
  20  -2  -8   12.19    4.17
  20  -2  -7   40.24    5.89
  21 -16   9    3.76    6.79
  21 -14   8   11.96    6.27
  21 -12   7   17.71    7.95
  21 -11   6   26.62    6.43
  21 -10   5   28.77    6.35
  21  -7   2  133.65    7.01
  21  -6   1   12.29    7.22
  21  -5  -1   -3.38    5.51
  21  -4  -3   17.02    5.29
  21  -3 -15    3.28    3.08
  21  -3  -6   15.45    4.81
  22 -15   8   35.80    8.57
  22 -14   7   31.94    6.83
  22 -12   6   44.96    6.82
  22 -11   5   72.07    7.09
  22  -7   1   -5.12    6.07
  22  -6   0  154.61    8.43
  22  -5  -2   18.73    7.06
  22  -4 -16    9.62    2.95
  22  -4  -5    4.74    4.62
  22  -3 -11   23.69    4.71
  22  -3 -10   30.68    5.32
  22  -3  -9   12.26    5.11
  23 -15   7   21.89    7.39
  23 -13   6   10.50    8.46
  23 -12   5   20.05    6.78
  23  -8   1   43.67    6.57
  23  -7   0   -7.73    7.86
  23  -6  -2   22.67    6.22
  23  -5  -4   18.22    5.62
  23  -4 -13   -6.22    4.54
  23  -4 -12    6.63    3.64
  23  -4 -11   12.07    4.17
  23  -4 -10   22.84    4.35
  23  -4  -9    7.47    4.62
  23  -4  -8   46.90    6.10
  23  -4  -7    6.38    6.27
  24 -15   6   -8.82    7.35
  24 -13   5  -23.37    8.61
  24 -12   4   -7.19    7.16
  24 -11   3   -3.45    7.35
  24 -10   2   59.49    7.53
  24  -9   1    1.33    6.62
  24  -8   0   31.76    8.69
  24  -7  -2   29.84    6.44
  24  -6  -4  104.43    6.92
  24  -5 -13   -1.83    3.67
  24  -5  -8   24.09    5.47
  24  -5  -7   13.96    6.86
  25 -13   4   15.05    9.60
  25 -12   3   21.77    7.80
  25 -11   2   90.23    8.54
  25 -10   1    8.73    7.45
  25  -9   0   33.07    8.79
  25  -8  -2   -0.82    6.98
  25  -7  -4    4.89    6.89
  25  -6  -7   15.01    6.43
  25  -6  -6   -5.47    7.55
  26 -12   2   13.74    9.82
  26 -11   1   31.00    9.79
  26 -10   0   71.67    9.78
  26  -9  -2    2.79    7.49
  26  -8  -4   13.72    7.50
  26  -7  -7   -2.59    6.59
  26  -7  -6   34.68    8.56
  27 -11  -1    2.04    8.08
  27 -10  -2   21.50    9.14
  27  -9  -4   42.40    9.81
  27  -8  -6   38.22    8.95
 -23 -17  -3   -7.33    6.04
 -23 -16  -5   -8.42    8.60
 -23 -16  -4    5.48    7.00
 -23 -15  -7   16.00    9.77
 -23 -15  -6    9.43    7.11
 -23 -14  -9    4.04    7.85
 -22 -19   1    9.56    4.97
 -22 -18   0   88.44    7.05
 -22 -17  -1   -6.70    7.09
 -22 -16  -2   95.58    8.24
 -22 -15  -3   -2.93    8.40
 -22 -14  -4   29.07    6.63
 -22 -13 -12    0.86   10.47
 -22 -13  -7    4.51    8.52
 -22 -13  -6   49.41    7.34
 -21 -20   3    1.09    4.38
 -21 -18   2  -11.30    4.45
 -21 -17   1    3.13    5.92
 -21 -13  -3   12.58    7.51
 -21 -12  -5   13.14    8.55
 -21 -11 -13    2.81    8.06
 -21 -11 -12   44.77    8.37
 -21 -11 -11    2.38    9.88
 -21 -11 -10   14.30   10.02
 -21 -11  -9   48.21    9.60
 -21 -11  -8   19.99    7.19
 -21 -11  -7   -0.16    7.23
 -20 -16   2   44.83    5.50
 -20 -15   1   13.90    5.85
 -20 -13  -1   -6.60    6.61
 -20 -12  -2    2.36    5.35
 -20 -11  -4   42.99    8.60
 -20 -10 -15    0.60    8.27
 -20 -10 -14   34.57    8.08
 -20 -10 -13   -4.19    9.51
 -20 -10  -7   12.96    8.61
 -20 -10  -6   29.77    6.50
 -19 -19   5    4.82    4.42
 -19 -17   4   34.63    4.86
 -19 -14   2   33.85    4.46
 -19 -13   1   47.19    5.98
 -19 -12   0   -1.83    4.55
 -19 -10  -3   15.12    5.63
 -19  -9 -15   15.31    7.78
 -19  -9 -14  -25.77    8.81
 -19  -9  -6   11.29    8.01
 -19  -9  -5   29.33    6.25
 -19  -8 -12    3.77    7.73
 -19  -8 -11    3.95    7.50
 -19  -8 -10   53.14    7.17
 -19  -8  -9   29.48    6.99
 -18 -19   6    8.38    3.87
 -18 -17   5    3.51    4.20
 -18 -15   4    2.51    3.57
 -18 -10  -1   34.71    6.27
 -18  -9 -18    5.20    7.53
 -18  -9 -17   -4.51    9.35
 -18  -8 -16   15.71    7.43
 -18  -8 -15   -1.30    8.83
 -18  -8  -5   90.31    8.19
 -18  -7 -12    9.34    6.85
 -18  -7 -11    4.72    6.78
 -18  -7 -10  -11.12    6.76
 -18  -7  -9   28.98    6.88
 -18  -7  -8   53.96    6.68
 -17 -19   7   -0.24    3.99
 -17 -15   5   -0.50    4.49
 -17 -11   2  184.53    4.86
 -17  -8 -18   39.03    7.76
 -17  -8  -2  114.87    5.63
 -17  -7 -16   87.78    8.41
 -17  -7 -15    2.19    8.94
 -17  -7  -5   76.67    7.62
 -17  -7  -4  194.94    6.66
 -17  -6 -12    4.87    6.56
 -17  -6 -11   20.57    6.83
 -17  -6 -10   30.30    6.57
 -17  -6  -9   33.42    6.57
 -17  -6  -8   95.01    6.94
 -16 -17   7   -5.58    3.15
 -16 -15   6   28.40    4.03
 -16 -12   4  135.84    4.08
 -16 -11   3   22.51    4.25
 -16 -10   2   47.86    4.84
 -16  -7 -18   16.92    7.45
 -16  -7  -2  261.66    6.43
 -16  -6 -16   89.85    7.97
 -16  -6 -15   -7.82    9.26
 -16  -6  -5   63.98    7.45
 -16  -5 -12   24.42    6.49
 -16  -5 -11   45.25    6.61
 -16  -5 -10   79.14    6.72
 -16  -5  -9   17.55    5.46
 -16  -5  -8  135.87    6.26
 -15 -20   9    4.74    2.52
 -15 -12   5   46.31    3.21
 -15 -11   4  171.32    4.63
 -15  -9   2  184.71    5.30
 -15  -8   1   58.50    4.13
 -15  -7 -20   18.86    7.43
 -15  -6 -18   -8.43    6.79
 -15  -5 -15   25.29    6.27
 -15  -5  -5  130.70    5.57
 -14 -21  10   -0.67    2.13
 -14 -18   9   34.53    2.68
 -14 -11   5   -2.35    3.51
 -14  -8   2  227.91    5.68
 -14  -7 -21   14.67    6.99
 -14  -6 -19   15.50    8.04
 -14  -6  -1   45.99    5.32
 -14  -5 -17   -1.48    8.89
 -14  -5  -3   79.43    6.10
 -14  -4 -15   19.63    6.57
 -14  -4 -14    8.72    7.45
 -14  -4  -6    3.74    6.66
 -14  -4  -5   80.45    5.02
 -13 -10   5   20.61    2.96
 -13  -8   3  287.69    4.88
 -13  -7   2  602.29    5.67
 -13  -5 -19  -12.82    6.40
 -13  -5  -1   15.18    3.72
 -13  -4 -17   -8.66    5.93
 -13  -4  -3   94.06    4.67
 -13  -3 -14   14.13    6.16
 -13  -3 -13   15.10    5.83
 -13  -3 -12   75.10    7.27
 -13  -3  -7    0.27    4.64
 -12 -13   8   53.53    2.29
 -12  -9   5  160.70    3.38
 -12  -8   4  312.56    4.40
 -12  -7   3   36.49    2.60
 -12  -5   0  124.95    4.86
 -12  -4 -18   80.15    8.21
 -12  -3 -16   33.14    6.04
 -12  -3  -4  294.29    5.64
 -12  -2 -12   29.40    5.07
 -12  -2 -11   81.39    5.45
 -12  -2 -10   12.91    4.82
 -12  -2  -9  120.72    5.48
 -11 -12   8  191.80    2.48
 -11  -4 -20   18.58    6.38
 -11  -3 -18   47.10    6.16
 -11  -2 -15   17.63    5.95
 -11  -2 -14   24.77    6.94
 -11  -2  -6  312.85    6.94
 -11  -2  -5  207.41    5.17
 -10  -5 -22    6.37    7.99
 -10  -4 -21    4.78    6.54
 -10  -3 -19    0.16    5.82
 -10  -3  -1   75.95    3.28
 -10  -2 -17    8.13    5.61
 -10  -2 -16  123.35    7.74
 -10  -1 -13   49.37    5.34
 -10  -1 -12  107.55    5.35
 -10  -1 -11  110.34    6.89
 -10  -1 -10  105.49    6.72
 -10  -1  -9   51.73    6.36
 -10  -1  -8  210.86    5.52
  -9  -9   7    0.05    1.34
  -9  -5 -23    6.07    7.86
  -9  -5   3  239.89    2.75
  -9  -3 -20   24.44    6.31
  -9  -3   0   27.78    2.57
  -9  -2  -2  102.34    3.39
  -9  -1 -15   27.42    5.16
  -9  -1  -5  120.95    4.53
  -8 -20  13    6.52    1.04
  -8  -3 -21   10.65    5.99
  -8  -2 -19    1.12    6.96
  -8  -2  -1  428.23    4.25
  -8   0 -12  331.46    6.16
  -8   0 -11    8.64    5.45
  -8   0 -10   10.41    5.87
  -8   0  -9    3.60    5.19
  -8   0  -8   95.69    4.50
  -7 -23  14    8.24    1.79
  -7  -4   3   20.36    1.69
  -7  -2 -20    8.80    5.65
  -7  -2   0    3.84    2.17
  -7  -1 -18   48.15    5.02
  -7   0 -15    1.29    4.63
  -7   0 -14  121.37    6.77
  -6  -2 -21   -4.17    5.41
  -6  -1 -19   18.41    5.56
  -6   0 -16   58.82    4.95
  -6   0  -4  402.11    4.25
  -5 -20  14   26.54    2.45
  -5  -4 -24    2.12    6.94
  -5  -3 -23   -0.04    5.41
  -5   0 -17    2.22    5.41
  -5   0  -3   -3.74    2.42
  -5   1  -7    6.16    2.72
  -4 -19  14   39.76    2.70
  -4 -16  13   40.64    2.37
  -4  -2 -22   -1.85    4.90
  -4   0 -18  154.17    5.58
  -4   0  -2  700.07    3.97
  -4   1 -15   10.11    3.99
  -3 -18  14   27.92    3.10
  -3  -7   8   96.79    1.55
  -3  -3 -24    8.00    5.23
  -3  -1 -21   -1.36    4.61
  -2  -3 -24   22.93    5.80
  -2  -2 -23    0.37    4.58
  -2   2 -11   -4.21    2.84
  -2   2 -10   78.44    3.95
  -2   2  -9    0.76    2.16
  -1 -17  14   33.37    3.54
  -1  -9  10  261.65    3.29
  -1  -2 -23    2.12    5.30
  -1   2 -13    1.40    3.58
  -1   2  -7   40.30    1.96
   0 -20  15   -3.83    3.94
   0 -14  13   -9.86    3.77
   0 -12  12   -0.20    3.16
   0  -1 -22   71.89    4.75
   0   0 -20  385.18    7.49
   0   2 -14   23.11    3.54
   1 -16  14   33.67    4.07
   1 -10  11  130.78    3.84
   1  -4   6  613.49    3.65
   1  -1 -22   73.58    5.22
   1   1 -18   41.25    4.64
   2 -19  15   11.39    4.59
   2  -7   9   35.04    3.67
   2  -3   5  151.41    2.49
   2   2  -5    0.75    0.88
   3 -19  15   51.70    5.12
   3  -2 -24   23.44    3.43
   4 -19  15    8.03    4.00
   4 -16  14   36.39    4.36
   4  -7   9  172.17    4.00
   4  -2 -24    4.97    3.67
   5 -19  15   -5.34    4.35
   5 -16  14   21.85    4.35
   5  -7   9  115.40    3.90
   6 -19  15   35.24    5.76
   6 -16  14  144.92    5.49
   6  -7   9   15.59    3.66
   6  -3   5  100.49    3.21
   7 -19  15    4.63    6.25
   7 -16  14    0.34    5.81
   7 -10  11   17.84    4.10
   7  -7   9   -5.29    4.86
   7  -6   8  164.32    4.41
   7  -3   5  408.32    4.62
   7   2 -15    8.78    1.40
   7   2  -5   68.99    1.30
   8 -20  15    0.58    5.10
   8 -16  14  141.35    7.20
   8 -14  13   35.11    4.76
   8 -12  12   32.46    4.49
   8 -10  11   71.57    5.91
   8  -6   8   51.75    3.88
   8  -5   7   51.49    3.84
   8  -4   6   88.06    4.11
   8  -1 -22   -0.96    2.36
   8  -1   2   32.09    2.90
   8   1 -18   20.31    1.77
   8   1  -2   48.44    2.20
   9 -20  15    0.77    6.95
   9 -17  14   16.35    5.31
   9 -14  13   12.94    6.15
   9 -12  12  124.96    5.44
   9   0   0  564.39    5.40
   9   2  -6  436.62    3.26
  10 -21  15   15.12    5.83
  10 -17  14   17.21    6.69
  10  -9  10   66.39    5.11
  10  -2   3  147.49    4.53
  10   1 -17   19.25    1.04
  10   1  -3  426.27    3.97
  10   2  -7  332.36    3.17
  11 -18  14   49.99    6.38
  11 -15  13   14.41    5.40
  11 -13  12  103.35    5.81
  11 -11  11   -3.67    4.65
  11  -8   9  140.52    5.32
  11  -3   4  513.79    6.26
  11  -1   1  669.46    6.18
  11   0  -1   -2.02    3.18
  11   2 -11  117.99    1.80
  11   2 -10   44.01    1.60
  11   2  -9  136.96    2.18
  12 -18  14   -7.69    7.24
  12 -13  12    7.47    6.94
  12  -7   8  174.20    6.54
  12  -6   7   36.19    4.47
  12  -5   6   23.34    4.28
  12  -4   5   -1.52    4.09
  13 -19  14   17.85    7.63
  13 -16  13   11.98    6.62
  13 -14  12    4.34    5.34
  13 -12  11    1.02    5.24
  13 -10  10  156.21    7.42
  13  -1   0  442.05    5.71
  13   0  -2   13.07    4.24
  14 -17  13   -7.70    5.92
  14  -9   9    9.04    6.63
  14  -8   8   30.17    4.62
  14  -4   4   16.98    4.42
  14  -2   1  210.95    5.19
  14   0  -3    3.76    4.38
  14   1 -13   41.99    2.01
  14   1  -7  168.31    4.18
  15 -18  13    3.72    6.23
  15 -15  12   16.44    7.29
  15 -13  11   -8.33    5.47
  15 -11  10   -1.17    6.59
  15 -10   9   19.21    5.59
  15  -6   6  166.31    6.85
  15  -3   2  452.77    6.63
  15   0 -16    2.54    1.41
  15   0  -4   76.57    5.27
  16 -19  13    0.65    6.80
  16 -16  12   31.99    7.69
  16 -14  11   20.78    5.66
  16 -12  10   21.05    5.80
  16  -9   8   86.91    5.83
  16  -8   7    9.89    4.85
  16  -5   4   78.97    5.03
  16  -4   3   60.35    4.79
  16  -2   0  265.21    6.80
  16   0  -6  265.75    4.73
  17 -17  12   76.72    8.29
  17 -15  11    9.73    6.00
  17 -13  10   35.87    6.23
  17 -11   9    0.38    5.57
  17  -4   2   48.33    4.93
  17  -2  -1   24.39    6.58
  17  -1  -4   72.29    4.34
  17   0 -12   40.38    2.96
  17   0 -11   -4.67    3.02
  17   0 -10   22.43    3.38
  17   0  -9    1.56    3.66
  17   0  -8  103.48    4.51
  18 -18  12    9.86    7.64
  18 -16  11    4.60    6.41
  18 -14  10    3.21    6.01
  18 -12   9    3.61    5.84
  18  -9   7   66.22    5.91
  18  -8   6  163.63    6.68
  18  -7   5   75.63    5.96
  18  -6   4  134.03    6.23
  18  -5   3   11.97    6.72
  18  -3   0   34.85    6.93
  18  -2 -18    8.81    1.74
  18  -2  -2   50.83    6.29
  18  -1 -15    9.50    2.21
  18  -1  -5   52.77    5.24
  19 -17  11   -8.54    6.90
  19 -15  10   -6.90    6.22
  19 -13   9    0.82    6.57
  19 -11   8   -3.06    7.36
  19 -10   7   -0.64    5.61
  19  -5   2   64.46    5.28
  19  -3  -1   17.50    6.43
  19  -2  -4   22.93    4.34
  19  -1 -12   29.99    3.49
  19  -1 -11    9.22    3.56
  19  -1 -10   -1.86    3.18
  19  -1  -9   15.33    4.38
  19  -1  -8   54.13    4.83
  20 -16  10  -11.82    6.77
  20 -14   9    9.55    6.60
  20 -12   8  -10.59    7.83
  20 -11   7   12.98    6.18
  20  -5   1    6.97    5.65
  20  -3  -3    3.98    4.71
  20  -2 -14   17.18    2.55
  20  -2  -6   66.34    4.47
  21 -15   9  -10.32    6.74
  21 -13   8   61.27    8.55
  21 -10   6   24.59    7.74
  21  -9   5   35.60    7.98
  21  -8   4    5.75    7.66
  21  -7   3   14.70    8.19
  21  -5   0   87.40    6.39
  21  -4  -2   58.89    5.49
  21  -3 -16    2.78    2.69
  21  -3  -5    9.31    4.29
  21  -3  -4  146.88    6.84
  21  -2 -10   45.83    4.76
  22 -14   8   -1.17    8.31
  22 -13   7    0.92    6.54
  22 -11   6   55.88    8.43
  22 -10   5   78.27    7.29
  22  -9   4   14.33    6.68
  22  -8   3   39.67    6.31
  22  -7   2    4.33    8.69
  22  -5  -1    5.93    7.16
  22  -4  -4    5.41    5.48
  22  -3 -13   -4.54    4.13
  22  -3 -12   26.19    3.51
  22  -3  -8   44.50    4.76
  22  -3  -7   -4.19    6.36
  23 -14   7    5.25    7.27
  23 -12   6   35.50    8.55
  23 -11   5   16.39    7.15
  23 -10   4    0.99    7.00
  23  -9   3   38.68    7.10
  23  -8   2   -8.46    6.23
  23  -7   1    7.33    7.71
  23  -6  -1    6.73    6.24
  23  -5  -3   15.68    5.84
  23  -4 -14    7.10    3.82
  23  -4  -6   96.09    7.46
  24 -14   6   12.73    8.00
  24 -12   5   -0.86    9.54
  24 -11   4    2.99    6.81
  24 -10   3  -11.06    6.92
  24  -9   2    7.99    6.66
  24  -8   1   20.27    8.41
  24  -7  -1   14.82    6.40
  24  -6  -3  -11.40    6.01
  24  -5  -6   66.91    6.16
  24  -5  -5    4.53    7.46
  25 -14   5    4.84    7.69
  25 -12   4   25.18   10.71
  25 -11   3   13.13    9.54
  25 -10   2    2.42    9.20
  25  -9   1   -5.40    8.43
  25  -8  -1  -20.06    6.82
  25  -7  -3   -3.27    6.56
  25  -7  -2   29.80    8.60
  25  -6  -5   51.84    6.71
  25  -5 -10    8.77    5.83
  26 -12   3  -12.28    9.75
  26 -11   2    8.40    9.60
  26  -9  -1   36.18    7.61
  26  -8  -3    0.31    7.19
  26  -8  -2   34.89    8.80
  26  -7  -5   13.87    6.89
  26  -6 -10   -1.89    6.25
  26  -6  -9    0.19    6.78
  27 -11   0    1.09    8.27
  27 -10  -1    7.93    9.19
  27  -9  -3   -0.50    7.61
  27  -8  -5    6.40    9.10
 -23 -17  -4    4.59    6.78
 -23 -16  -6   -0.50    7.25
 -23 -15  -8    1.27    7.43
 -22 -19   0    6.89    6.65
 -22 -18  -1   11.27    6.99
 -22 -16  -3    6.31    7.82
 -22 -15  -4    0.41    8.30
 -22 -14  -7   21.24    8.87
 -22 -14  -6    6.55    7.18
 -22 -14  -5   -5.15    6.68
 -22 -13 -11   38.57    8.79
 -22 -13 -10    5.12    8.33
 -22 -13  -9   11.78    7.94
 -22 -13  -8   11.24    7.10
 -21 -19   2    4.80    4.91
 -21 -18   1    3.97    5.80
 -21 -16   0   22.42    5.30
 -21 -15  -1   -3.18    5.33
 -21 -14  -3   -3.59    7.53
 -21 -14  -2   24.69    6.12
 -21 -13  -4   33.50    6.24
 -21 -12 -14    9.92    8.85
 -21 -12 -13   -1.09    8.08
 -21 -12 -12  -28.65   11.33
 -21 -12 -11    3.40   10.02
 -21 -12  -8   38.46    9.19
 -21 -12  -7   -1.72    8.90
 -21 -12  -6   77.38    7.69
 -20 -20   4   37.34    4.40
 -20 -18   3    6.39    4.11
 -20 -17   2    3.52    5.36
 -20 -14   0   10.19    5.43
 -20 -12  -3   11.70    5.78
 -20 -11 -15   -6.22    8.23
 -20 -11 -14   50.48   11.40
 -20 -11  -5   11.47    6.35
 -20 -10 -12   22.40    7.83
 -20 -10 -11   10.81    7.75
 -20 -10 -10   55.55    8.40
 -20 -10  -9   20.17    7.55
 -20 -10  -8    7.01    6.83
 -19 -20   5    5.65    4.41
 -19 -18   4   -5.36    4.46
 -19 -16   3   17.94    4.94
 -19 -12  -1   -8.98    6.60
 -19 -11  -2  150.36    6.03
 -19 -10 -16   -3.92    7.83
 -19 -10 -15   -7.26    9.32
 -19 -10  -4   24.24    6.03
 -19  -9 -13   15.03    7.43
 -19  -9 -12   41.98    7.86
 -19  -9 -11   40.33   10.12
 -19  -9 -10   -2.94    8.68
 -19  -9  -9    8.32    8.54
 -19  -9  -8  -12.03    8.73
 -19  -9  -7   24.88    6.79
 -18 -14   3   50.00    4.34
 -18 -13   2   29.18    4.40
 -18 -12   1    2.76    4.04
 -18 -11   0   -3.10    4.35
 -18  -9 -16   27.26    9.48
 -18  -9  -3   46.12    5.45
 -18  -8 -14   92.17    8.06
 -18  -8 -13    2.24    7.25
 -18  -8 -12   11.15    9.25
 -18  -8  -7    2.04    8.44
 -18  -8  -6  185.88    7.60
 -17 -17   6   32.79    3.35
 -17 -14   4   21.79    4.70
 -17 -10   0   -7.85    5.84
 -17  -9 -18  -10.16   10.13
 -17  -9  -1   37.14    4.92
 -17  -8 -17   15.46    7.73
 -17  -8 -16    6.63    8.85
 -17  -8  -3   -7.55    5.26
 -17  -7 -14  160.88    8.75
 -17  -7 -13   33.79    9.60
 -17  -7  -6  342.45    8.43
 -16 -20   8    2.86    2.96
 -16  -8 -19    6.77    7.61
 -16  -8 -18    8.24    8.88
 -16  -8  -1   10.82    4.78
 -16  -7 -17   12.21    7.18
 -16  -7 -16   19.00    8.89
 -16  -7  -3   51.28    5.49
 -16  -6 -14  130.07    7.60
 -16  -6 -13   -8.45    9.17
 -16  -6  -6  503.76    8.18
 -15 -14   6  120.31    4.14
 -15 -10   3   45.50    3.35
 -15  -8 -20   -3.71    8.93
 -15  -7 -19   -1.83    6.89
 -15  -7 -18   22.25    8.58
 -15  -7  -1   17.01    4.36
 -15  -6 -17   28.46    6.65
 -15  -6 -16   27.98    8.52
 -15  -6  -3   84.67    5.17
 -15  -5 -14   21.21    6.33
 -15  -5 -13   30.45    6.56
 -15  -5 -12   38.94    8.02
 -15  -5  -7  166.54    8.15
 -15  -5  -6   34.51    5.10
 -14 -16   8    8.31    2.32
 -14 -14   7   -3.94    2.72
 -14 -10   4   35.86    2.91
 -14  -9   3    7.98    2.98
 -14  -7 -20   -5.95    6.78
 -14  -6 -18   11.33    9.21
 -14  -5 -16   -4.27    6.14
 -14  -4 -13   28.93    6.19
 -14  -4 -12  -10.64    5.96
 -14  -4 -11   11.64    7.44
 -14  -4 -10  133.00    7.42
 -14  -4  -9   33.66    6.88
 -14  -4  -8   29.19    6.47
 -14  -4  -7  127.27    5.66
 -13 -19  10    3.80    1.86
 -13  -9   4  201.56    3.61
 -13  -7 -21  -16.37    8.72
 -13  -6 -20  -18.68    6.85
 -13  -6   0  132.91    5.54
 -13  -5 -18   24.12    6.67
 -13  -4 -16   32.59    6.24
 -13  -4 -15    9.92    7.47
 -13  -4  -4   15.96    4.37
 -13  -3 -11   74.17    5.63
 -13  -3 -10   51.08    5.15
 -13  -3  -9   86.27    5.50
 -13  -3  -8   91.58    5.46
 -12 -15   9   23.07    1.89
 -12  -6 -21    2.24    6.26
 -12  -5 -19   -8.21    7.72
 -12  -4 -17   -5.46    7.57
 -12  -4  -2  392.89    5.60
 -12  -3 -15   -0.60    5.72
 -12  -3 -14  162.94    8.18
 -12  -3  -5  153.56    5.18
 -11  -6 -22   10.71    6.87
 -11  -5   1   11.04    2.50
 -11  -3 -17   13.58    5.76
 -11  -3  -3    0.20    3.87
 -11  -2 -13   23.98    5.22
 -11  -2 -12   18.53    6.96
 -11  -2  -7   16.84    4.48
 -10 -17  11    5.88    1.14
 -10  -5   2  111.79    2.60
 -10  -3 -18   52.73    7.58
 -10  -2 -15   44.09    7.53
 -10  -2  -4  735.06    6.85
  -9  -6   4  252.47    2.98
  -9  -4 -21    5.24    6.13
  -9  -3 -19   12.59    7.76
  -9  -2 -17   35.51    5.68
  -9  -1 -14   57.12    5.48
  -9  -1 -13   35.77    7.08
  -9  -1  -6  244.33    5.11
  -8  -5 -23    2.08    8.54
  -8  -4 -22    3.16    6.58
  -8  -3 -20   10.64    7.40
  -8  -1  -4    6.86    2.98
  -7  -2 -19    8.76    6.53
  -7   0 -13   -8.68    4.39
  -7   0  -7   -4.24    4.73
  -7   0  -6  721.36    6.17
  -6 -21  14    9.11    1.91
  -6  -2 -20   43.34    7.14
  -6  -1 -18    7.53    4.54
  -6   0 -15    0.44    4.39
  -5  -2 -21   33.43    5.39
  -5  -1 -19   17.36    5.01
  -5   0 -16   45.60    5.73
  -5   1 -11  114.33    4.39
  -5   1 -10  161.70    5.07
  -5   1  -9  101.06    3.84
  -5   1  -8 1045.61    6.90
  -4 -23  15   -3.53    2.76
  -4 -10  10   79.99    1.56
  -4  -4 -24   28.07    6.72
  -4  -1   0  781.36    3.47
  -4   0 -17   -7.88    5.16
  -4   1 -14   17.95    3.93
  -4   1  -6  671.23    4.83
  -3 -22  15    1.48    2.89
  -3 -15  13   52.29    2.92
  -3  -2 -22    7.31    4.69
  -2 -21  15    5.88    3.18
  -2 -17  14   10.31    3.06
  -2   1 -16   55.45    3.89
  -1 -20  15    0.87    3.58
  -1 -14  13   49.58    3.64
  -1 -12  12   76.47    3.44
  -1   2 -12  495.13    4.89
   0 -19  15   -3.27    3.79
   0 -16  14   35.54    3.86
   0 -10  11   -0.26    3.13
   0  -6   8  462.51    3.85
   0  -5   7   -2.38    1.92
   0   1 -17    5.86    4.12
   0   2 -13    2.02    3.56
   1 -19  15   32.98    4.31
   1  -7   9   87.84    3.21
   1  -3   5  345.68    3.16
   1   0 -20  152.01    5.46
   2  -1 -22   24.24    4.40
   2   0 -20   82.63    4.71
   2   1 -18    9.60    3.85
   3 -18  15   24.40    4.94
   3 -13  13   26.16    4.57
   3 -11  12   49.50    4.65
   3  -2   4 3651.66    8.65
   4 -22  16    2.65    5.24
   4 -18  15    7.96    5.40
   4 -13  13    4.01    3.56
   4  -8  10  224.33    4.36
   4  -2   4  151.54    2.95
   5 -18  15    0.59    5.25
   5 -15  14   -6.00    5.27
   5 -13  13   43.96    3.98
   5 -11  12   55.95    4.96
   5  -8  10   80.43    3.95
   5  -2   4  255.00    3.54
   5   2 -15   19.84    2.18
   6 -18  15   -3.47    5.96
   6 -15  14   23.67    5.70
   6 -13  13   48.56    4.07
   6 -11  12  125.86    5.54
   6  -8  10  104.04    4.32
   6  -2   4  191.05    3.50
   6   2 -15   11.19    1.83
   7 -18  15   27.49    6.10
   7 -13  13    9.96    5.10
   7 -11  12   36.58    5.99
   7  -8  10   77.48    5.38
   7  -2   4   57.31    4.19
   7  -1 -22   69.08    2.89
   7   1 -18   59.68    2.27
   8 -19  15   23.88    5.10
   8 -13  13   34.49    5.65
   8  -7   9   55.90    4.05
   8  -3   5  151.51    4.25
   8   0 -20  137.85    2.81
   8   2  -5   23.24    1.76
   9 -19  15   -2.35    6.82
   9 -16  14   11.20    5.05
   9 -10  11   12.17    4.54
   9  -7   9   48.89    5.34
   9  -6   8  140.51    4.70
   9  -5   7  332.29    5.53
   9  -4   6  473.99    5.89
   9  -3   5   68.31    5.26
   9  -1   2  261.38    4.11
   9   1  -2  350.78    4.23
  10 -20  15    0.25    5.79
  10 -19  15   -9.86    6.88
  10 -16  14   -7.89    6.49
  10 -14  13   -7.02    4.99
  10 -12  12   11.91    4.61
  10 -10  11   -6.61    5.98
  10  -6   8   27.58    5.74
  10  -5   7   35.82    5.35
  10  -4   6  505.72    7.43
  10   0   0  638.53    6.31
  11 -20  15   12.78    7.04
  11 -17  14   26.70    5.86
  11 -14  13   21.61    7.08
  11 -12  12   93.06    7.18
  11  -9  10  121.22    5.48
  11  -2   3 1072.64    7.90
  11   0 -19   -0.68    1.03
  11   1  -3  157.40    3.81
  11   2 -12   29.44    1.32
  11   2  -8   32.51    2.06
  12 -17  14   77.16    7.50
  12 -15  13    8.91    5.43
  12 -11  11   19.64    5.09
  12  -8   9   38.79    4.61
  12  -3   4  263.71    5.45
  12  -1   1  107.74    4.22
  12   0  -1   -4.98    2.72
  12   1  -4  313.20    4.17
  13 -18  14   26.90    7.65
  13 -15  13   -2.77    6.74
  13 -13  12  118.53    7.41
  13 -11  11   17.27    6.67
  13  -7   8   43.15    4.71
  13  -6   7   81.82    4.85
  13  -5   6   35.30    4.48
  13  -4   5   36.48    5.66
  13  -2   2  148.81    4.83
  13   1  -5  103.85    3.21
  14 -19  14   -3.59    6.31
  14 -16  13    1.70    5.99
  14 -14  12   32.52    5.58
  14 -12  11   -0.46    5.35
  14 -10  10    0.20    6.86
  14  -3   3  180.06    5.30
  14  -1   0  139.91    5.93
  14   1  -6  162.00    4.23
  15 -17  13    1.53    5.73
  15 -14  12    9.07    7.20
  15  -9   9    9.05    6.23
  15  -8   8  201.81    6.12
  15  -7   7   24.69    4.85
  15  -5   5  130.52    5.31
  15  -4   4    9.90    4.60
  15  -2   1   50.19    4.45
  15  -1  -1   36.72    4.17
  15   1 -11  147.00    3.27
  15   1 -10   16.06    2.97
  15   1  -9   30.11    3.10
  16 -18  13   13.72    6.33
  16 -15  12    8.93    7.42
  16 -13  11   31.65    5.83
  16 -11  10  134.86    7.99
  16 -10   9    1.40    5.29
  16  -3   2    2.02    4.39
  16  -1 -18    1.35    1.29
  16  -1  -2   50.88    4.43
  16   0 -15   -1.05    1.81
  16   0  -5   -1.12    3.30
  17 -16  12   33.52    6.36
  17 -14  11   15.56    6.24
  17 -12  10  117.43    6.67
  17  -9   8   59.59    5.69
  17  -8   7   40.16    5.57
  17  -7   6  230.11    6.39
  17  -6   5   58.03    5.01
  17  -5   4  145.68    5.62
  17  -4   3   22.17    6.18
  17  -3   1   52.61    4.80
  17  -1 -17   -0.79    1.62
  17  -1  -3   13.66    4.13
  17   0 -13    2.66    2.28
  17   0  -7   -3.12    4.07
  18 -17  12   63.23    8.27
  18 -15  11   18.48    6.24
  18 -13  10   25.79    6.32
  18 -11   9    1.54    7.22
  18 -10   8    3.00    5.65
  18  -4   2   54.06    4.85
  18  -1  -4  101.45    5.77
  19 -16  11   -3.36    6.45
  19 -14  10   28.79    6.54
  19 -12   9    5.21    6.30
  19  -9   7    1.54    8.01
  19  -8   6   69.00    6.15
  19  -7   5   77.09    6.04
  19  -6   4   34.84    6.99
  19  -4   1   -3.53    5.06
  19  -2 -17   16.08    2.29
  19  -2  -3   47.07    4.82
  19  -1 -13   27.69    3.20
  19  -1  -7   67.42    4.28
  20 -15  10   42.62    7.15
  20 -13   9    4.25    6.38
  20 -11   8   50.23    8.16
  20 -10   7  -12.89    5.83
  20  -9   6   31.33    6.21
  20  -8   5   -4.00    5.72
  20  -7   4   13.63    5.81
  20  -6   3   16.90    5.88
  20  -5   2   38.35    7.17
  20  -4   0  284.95    7.50
  20  -3  -2   76.86    5.40
  20  -2 -15   17.36    2.92
  20  -2  -5    8.45    4.14
  21 -16  10   50.61    7.46
  21 -14   9    0.90    6.72
  21 -12   8    2.06    7.89
  21 -11   7   -1.78    6.48
  21  -6   2   -2.25    5.64
  21  -5   1    1.09    7.07
  21  -4  -1    0.84    5.35
  21  -3  -3    7.81    6.14
  21  -2 -12   64.83    4.24
  21  -2 -11   18.16    3.68
  21  -2  -9    3.73    4.00
  21  -2  -8   41.56    4.49
  21  -2  -7   35.69    5.60
  22 -15   9  -10.61    8.26
  22 -13   8   20.28    8.25
  22 -12   7    9.14    6.51
  22  -6   1   -7.09    6.14
  22  -4  -3   13.07    5.49
  22  -3 -14   11.27    3.69
  22  -3  -6   97.32    6.02
  22  -3  -5   30.53    6.46
  23 -15   8   10.52    7.20
  23 -13   7   12.90    6.96
  23 -10   5    9.42    8.28
  23  -9   4    8.13    8.05
  23  -6   0   22.82    7.76
  23  -5  -2   35.39    5.91
  23  -4  -5   -2.17    5.43
  23  -4  -4   79.71    7.35
  24 -14   7   16.14    8.97
  24 -13   6   15.82    7.68
  24 -10   4    7.92    8.48
  24  -9   3  -15.39    8.46
  24  -7   0   44.77    6.91
  24  -6  -2   -0.70    5.93
  24  -5  -4   92.38    6.96
  24  -4 -12   -4.90    4.59
  24  -4 -11    9.49    4.96
  24  -4 -10    3.51    5.38
  24  -4  -9    8.65    5.61
  24  -4  -8   14.33    6.56
  25 -13   5    1.92    7.56
  25 -10   3  -14.06    8.71
  25  -8   0    3.30    6.72
  25  -7  -1   29.32    8.56
  25  -6  -4   75.20    7.34
  25  -5 -12   17.90    4.94
  25  -5 -11    3.02    4.32
  25  -5  -9    1.19    4.97
  25  -5  -8    2.60    5.79
  25  -5  -7   16.53    7.20
  26 -10   1    0.87    7.73
  26  -9   0    1.81    7.30
  26  -8  -1   26.25    8.70
  26  -7  -4   20.12    7.12
  26  -7  -3    6.69    8.83
  26  -6  -8    5.25    6.09
  26  -6  -7   27.14    6.45
  26  -6  -6   35.87    8.19
  27 -11   1   19.00    8.51
  27  -9  -2    5.87    7.55
  27  -8  -4   14.00    7.62
  27  -8  -3    2.46    8.91
  27  -7  -7   10.12    6.35
  27  -7  -6    8.19    8.04
 -22 -19  -1   10.29    6.95
 -22 -17  -3    9.09    7.99
 -22 -17  -2    8.70    6.14
 -22 -16  -4    2.28    8.21
 -22 -15  -6   42.50    8.60
 -22 -15  -5   11.33    6.97
 -22 -14 -11   11.38    8.63
 -22 -14 -10   -0.71    8.17
 -22 -14  -9    1.78    7.79
 -22 -14  -8   21.19    7.59
 -21 -20   2   27.32    4.98
 -21 -17   0   77.06    6.04
 -21 -16  -1   12.65    5.39
 -21 -15  -2   61.53    6.28
 -21 -14  -4   24.52    8.31
 -21 -13 -12   10.27   10.53
 -21 -13  -7    2.49    9.02
 -21 -13  -6   64.29    8.89
 -21 -13  -5   -6.68    6.75
 -21 -12 -10   -9.94    7.99
 -21 -12  -9   12.38    7.42
 -20 -19   3   -4.64    4.08
 -20 -16   1    1.13    4.71
 -20 -15   0   43.47    6.72
 -20 -14  -1    5.75    5.36
 -20 -13  -2   96.47    6.23
 -20 -12 -15    9.44    8.55
 -20 -12  -4   20.20    6.11
 -20 -11 -13   -0.29    7.95
 -20 -11 -12   20.34    7.71
 -20 -11 -11  -23.99    9.26
 -20 -11 -10   52.26   10.68
 -20 -11  -9   22.46    9.97
 -20 -11  -8   73.33    9.41
 -20 -11  -7   -8.38    7.14
 -20 -11  -6   31.48    6.94
 -19 -21   5    6.29    4.51
 -19 -17   3    5.89    4.90
 -19 -15   2   48.39    4.60
 -19 -14   1   43.67    5.00
 -19 -13   0   20.73    5.06
 -19 -11 -16   11.56    8.08
 -19 -11  -3   22.37    5.65
 -19 -10 -14   40.03    8.33
 -19 -10 -13   11.18    9.14
 -19 -10  -6   19.26    8.24
 -19 -10  -5   31.64    6.14
 -18 -20   6   16.49    3.48
 -18 -18   5   15.78    4.10
 -18 -16   4   70.60    4.05
 -18 -15   3   16.81    4.87
 -18 -11  -1    8.10    6.00
 -18 -10 -17    7.66    7.27
 -18 -10  -2  101.82    5.65
 -18  -9 -15   24.49    7.14
 -18  -9 -14  -14.37    8.56
 -18  -9  -5  108.56    8.33
 -18  -9  -4   65.03    6.14
 -18  -8 -11   47.29    7.24
 -18  -8 -10   27.68    7.05
 -18  -8  -9   20.66    6.87
 -18  -8  -8   65.53    6.79
 -17 -20   7   -0.94    3.55
 -17 -18   6   27.20    3.94
 -17 -16   5   -1.00    3.96
 -17 -13   3   -2.30    3.61
 -17 -12   2   66.80    4.15
 -17 -11   1    4.11    3.93
 -17  -9 -17  -13.76    9.03
 -17  -9  -2  142.71    5.85
 -17  -8 -15   34.67    7.14
 -17  -8  -4  223.80    6.84
 -17  -7 -12   84.20    7.50
 -17  -7 -11   11.21    6.49
 -17  -7 -10   18.75    6.56
 -17  -7  -9   11.44    6.32
 -17  -7  -8  308.10    8.53
 -17  -7  -7    6.85    6.24
 -16 -18   7    9.19    3.41
 -16 -16   6   41.78    3.85
 -16 -14   5   21.79    3.21
 -16 -13   4   14.51    4.28
 -16 -10   1    5.28    4.99
 -16  -9 -19    5.65    7.33
 -16  -9   0   18.86    4.25
 -16  -8 -17  -16.29    9.75
 -16  -8  -2  -19.19    6.91
 -16  -7 -15   21.98    6.80
 -16  -7  -4  256.30    6.98
 -16  -6 -12   41.38    6.79
 -16  -6 -11   43.78    6.76
 -16  -6 -10    2.91    6.16
 -16  -6  -9   14.82    5.63
 -16  -6  -8   52.97    5.68
 -16  -6  -7   73.75    5.87
 -15 -21   9    2.56    2.55
 -15 -18   8   36.84    3.14
 -15 -16   7   -1.52    3.02
 -15  -8 -19   -4.79    8.58
 -15  -8   0    5.96    4.06
 -15  -7 -17   19.52    8.92
 -15  -7  -2  110.40    7.00
 -15  -6 -15   54.59    6.99
 -15  -6  -4  122.28    5.45
 -15  -5 -11   74.14    6.62
 -15  -5 -10    6.40    5.30
 -15  -5  -9   72.00    6.21
 -15  -5  -8   51.67    5.60
 -14 -22  10    8.17    2.46
 -14  -7 -19   -6.05    8.09
 -14  -7   0   81.26    4.37
 -14  -6 -17   37.95    8.33
 -14  -6  -2  105.06    4.71
 -14  -5 -15   16.72    6.28
 -14  -5 -14   46.87    8.13
 -14  -5  -5  140.51    6.80
 -14  -5  -4   17.72    4.51
 -13 -13   7   -0.17    2.58
 -13  -6 -19    2.35    6.43
 -13  -5 -17   28.71    6.33
 -13  -5  -2  397.82    5.89
 -13  -4 -14   84.63    6.56
 -13  -4  -5   19.26    4.60
 -12  -6 -20   27.23    8.01
 -12  -6   1   22.28    3.25
 -12  -4 -16   50.61    8.71
 -12  -4  -3   15.68    5.42
 -12  -3 -13   30.87    5.40
 -12  -3 -12   96.34    7.58
 -12  -3  -7    9.25    6.41
 -12  -3  -6  202.66    5.52
 -11 -16  10  134.65    2.04
 -11 -14   9   12.00    1.81
 -11  -6 -21   -5.04    7.46
 -11  -6   2   82.42    3.71
 -11  -5 -20   -0.20    6.37
 -11  -4 -18   35.51    6.25
 -11  -4  -1  120.59    3.63
 -11  -3 -16  250.63    7.57
 -11  -3 -15    7.63    7.64
 -11  -3  -4  536.35    7.74
 -11  -2 -11  108.63    5.43
 -11  -2 -10   31.79    4.93
 -11  -2  -9  143.18    5.41
 -11  -2  -8   23.90    4.49
 -10 -10   7    1.43    1.42
 -10  -6   3   22.72    2.52
 -10  -4 -19   -3.17    7.91
 -10  -4   0   29.83    3.85
 -10  -3 -17    4.30    6.94
 -10  -3  -2 1137.62    7.39
 -10  -2 -14  120.74    5.95
 -10  -2  -5  332.97    5.61
  -9  -8   6  105.45    2.00
  -9  -7   5   12.21    1.88
  -9  -5 -22    3.06    6.16
  -9  -4   1  496.04    4.72
  -9  -2 -16   14.02    5.28
  -9  -2  -3  299.75    4.45
  -9  -1 -12  123.04    5.15
  -9  -1 -11   32.36    4.52
  -9  -1 -10  274.77    7.23
  -9  -1  -9  211.60    6.87
  -9  -1  -8  106.57    4.69
  -9  -1  -7  211.37    5.09
  -8  -4   2   90.01    2.65
  -8  -1 -14   68.29    7.29
  -8  -1  -5   28.30    4.81
  -7  -9   8   52.95    0.80
  -7  -4 -22   -7.58    6.10
  -7  -1 -16   73.52    5.50
  -7  -1  -3   61.75    3.00
  -7   0 -12  292.93    5.99
  -7   0 -11    0.38    3.94
  -7   0 -10 1187.32    9.23
  -7   0  -9   -9.62    4.85
  -7   0  -8  788.00    6.83
  -6  -5 -24    8.67    6.14
  -6  -3 -21   20.89    6.94
  -6  -3   2    6.11    1.75
  -6  -1  -2   36.07    3.55
  -6   0 -14  190.09    5.49
  -6   0  -5   -2.59    2.69
  -5 -14  12  175.02    2.38
  -5  -9   9   61.14    0.98
  -5  -2 -20   18.17    6.82
  -5  -1 -18  111.57    6.80
  -5  -1  -1  502.63    4.26
  -4  -2 -21    3.16    5.02
  -4   1 -13   17.15    3.83
  -4   1 -12   47.28    4.73
  -4   1  -7  338.72    3.99
  -3 -21  15   -3.68    3.03
  -3 -11  11   16.16    1.80
  -3  -3 -23    0.86    4.62
  -3   1 -14   42.16    4.72
  -3   1  -5  322.61    3.33
  -2 -20  15   24.32    3.66
  -2  -9  10  212.89    2.73
  -2  -2 -22   11.47    4.59
  -2   1 -15    6.24    4.86
  -2   1  -4  998.76    4.61
  -1 -16  14   27.52    3.36
  -1   1 -16   45.19    4.47
  -1   2 -10  592.68    4.71
  -1   2  -9   21.25    2.08
   0  -4   6 2128.33    5.61
   0  -3 -24   21.08    5.36
   0   0 -19   -3.90    4.64
   0   2 -12   22.99    3.60
   1 -18  15   -5.39    4.05
   1 -13  13   29.71    4.13
   1   1 -17    0.88    4.15
   1   2 -13    7.05    2.82
   2 -22  16   10.69    5.40
   2 -15  14   40.86    4.98
   2  -2 -23    4.02    4.33
   2  -2   4 8553.43   11.62
   3 -22  16   -1.25    4.20
   3 -15  14    8.82    3.76
   3   0 -20   12.59    3.76
   4 -21  16    2.61    5.03
   4  -9  11   -1.33    4.65
   4   0   1    2.57    2.84
   5 -21  16   -3.51    5.36
   5  -9  11  114.77    5.48
   5   0   1   -2.71    2.22
   6 -21  16   -6.50    5.50
   6 -17  15   -9.43    5.28
   6  -9  11  167.30    6.13
   6   0 -20   71.69    3.26
   6   0   1    5.95    2.37
   7 -21  16   26.27    6.47
   7 -15  14   27.19    4.78
   7  -9  11   94.95    6.08
   7   0 -20    8.35    2.49
   7   0   1   -3.03    3.48
   8 -18  15   -3.42    4.88
   8 -15  14   30.16    5.19
   8 -11  12  317.49    6.28
   8  -8  10   21.66    4.32
   8  -2   4   55.29    3.21
   9 -18  15   15.00    6.91
   9 -15  14   36.66    6.71
   9 -13  13   31.25    4.59
   9 -11  12   17.84    4.55
   9  -8  10  210.93    5.67
   9  -2   4  473.81    6.58
  10 -18  15   10.77    7.20
  10 -13  13   16.53    6.42
  10  -7   9   80.88    4.68
  10  -3   5  515.57    6.13
  10  -1   2  282.11    4.75
  10   1  -2  280.23    4.30
  10   2  -6  665.61    4.22
  11 -19  15   14.12    7.05
  11 -16  14   24.02    5.75
  11 -10  11   -0.70    4.67
  11  -7   9   90.17    5.99
  11  -6   8  140.46    5.02
  11  -5   7   24.89    4.17
  11  -4   6  207.01    5.17
  11   0   0  369.24    5.54
  11   2  -7   22.96    2.30
  12 -20  15   -8.24    5.94
  12 -16  14    9.53    7.07
  12 -14  13   26.77    5.22
  12 -12  12   77.52    5.82
  12  -9  10  208.31    6.23
  12  -2   3   49.37    4.21
  13 -17  14  -15.45    7.30
  13  -9  10    6.22    6.60
  13  -8   9    8.84    4.47
  13  -3   4  320.80    5.86
  13  -1   1    7.53    5.11
  13   0  -1    3.79    4.47
  13   1  -4  171.23    4.53
  14 -18  14   27.51    6.47
  14 -15  13   -2.47    7.18
  14 -13  12   -4.72    5.45
  14 -11  11   20.44    6.68
  14  -8   9    1.71    6.18
  14  -7   8   74.84    5.17
  14  -6   7   31.62    4.65
  14  -4   5   54.25    5.97
  14  -2   2  458.58    6.40
  14   0  -2  276.71    4.99
  14   1 -14   46.42    1.75
  15 -19  14   18.39    6.74
  15 -16  13    7.35    5.89
  15 -12  11   84.05    6.27
  15 -10  10  148.71    7.65
  15  -3   3  118.69    5.03
  15   0  -3    7.43    3.64
  15   1 -12    8.76    2.16
  15   1  -8    2.92    2.41
  15   1  -7   30.32    3.64
  16 -17  13  -13.26    6.01
  16 -14  12  -15.12    8.26
  16 -12  11   11.02    7.18
  16  -9   9   -5.80    6.75
  16  -8   8   50.45    5.11
  16  -7   7   98.47    5.50
  16  -6   6  433.68    7.18
  16  -5   5  213.78    5.99
  16  -4   4   94.67    6.38
  16  -2   1   44.06    6.11
  16  -1  -1   33.60    5.93
  16   0  -4  339.36    6.22
  17 -18  13  -13.72    6.07
  17 -15  12   34.82    7.58
  17 -13  11    3.05    5.96
  17 -11  10   35.95    7.41
  17 -10   9    5.57    5.62
  17  -3   2  299.12    7.85
  17  -2   0   19.97    4.85
  17  -1  -2  175.68    6.72
  17   0  -6  299.37    5.10
  18 -16  12    9.14    7.68
  18 -14  11   -3.08    6.03
  18 -12  10    1.67    6.06
  18  -9   8   22.71    7.38
  18  -8   7    8.41    5.57
  18  -7   6  150.01    6.60
  18  -6   5   37.14    5.01
  18  -5   4   65.93    7.02
  18  -3   1   39.99    5.15
  18  -2  -1  116.50    5.52
  18  -1 -16   17.01    2.31
  18   0 -10   12.91    3.75
  18   0  -9   -4.32    4.06
  19 -17  12    5.84    8.16
  19 -15  11   -7.96    6.26
  19 -13  10  -12.38    6.25
  19 -11   9    5.07    7.71
  19 -10   8   42.34    6.55
  19  -5   3   46.05    5.20
  19  -4   2   30.81    7.07
  19  -3   0   37.16    5.12
  19  -2  -2   53.56    6.33
  19  -1 -14   41.36    3.08
  19  -1  -6   27.50    3.94
  19  -1  -5    9.14    5.57
  20 -16  11    2.12    7.02
  20 -14  10   -3.56    6.62
  20 -12   9   -0.47    8.01
  20  -8   6    1.68    7.34
  20  -7   5   35.91    8.25
  20  -4   1    9.34    7.03
  20  -3  -1    0.10    4.94
  20  -2 -16   -0.42    2.61
  20  -2  -4   44.34    4.74
  20  -1 -11    3.05    3.79
  20  -1 -10   15.13    4.31
  20  -1  -9    7.00    4.40
  20  -1  -8   54.73    5.23
  21 -15  10   26.44    7.08
  21 -13   9    6.65    7.90
  21 -10   7   46.19    8.14
  21  -9   6   16.84    6.10
  21  -8   5    7.14    5.92
  21  -7   4   28.20    6.23
  21  -6   3   10.89    8.12
  21  -4   0   63.22    7.21
  21  -3 -17    4.12    2.48
  21  -2 -13    7.64    2.72
  21  -2  -6   76.31    5.15
  22 -14   9    5.32    8.33
  22 -11   7   33.06    8.13
  22 -10   6   12.15    6.54
  22  -9   5   21.95    6.82
  22  -8   4   31.10    6.32
  22  -7   3   -2.19    6.03
  22  -6   2   15.13    8.74
  22  -5   0    8.37    5.64
  22  -4  -2   44.93    5.60
  22  -3 -15    2.62    3.39
  22  -3  -4   60.78    6.71
  23 -14   8    6.21    7.24
  23 -12   7    1.23    8.67
  23 -11   6    5.77    6.73
  23  -8   3   18.54    6.74
  23  -7   2   80.96    6.87
  23  -6   1   -2.58    7.67
  23  -5  -1    4.63    7.53
  23  -4  -3    9.67    6.93
  23  -3 -12   15.17    4.19
  23  -3 -11    7.49    4.57
  23  -3 -10   -1.80    4.02
  23  -3  -9   10.61    4.15
  23  -3  -8   28.33    5.69
  23  -3  -7   17.92    6.12
  24 -13   7  -11.58    8.92
  24 -12   6   25.18    7.30
  24 -11   5    9.29    7.19
  24  -8   2   20.50    6.96
  24  -7   1   42.07    8.35
  24  -6  -1    5.02    6.70
  24  -5  -3    9.84    5.98
  24  -4 -13    1.97    4.04
  24  -4  -7    9.81    5.39
  24  -4  -6   82.23    7.21
  25 -13   6    8.17    9.37
  25 -12   5   13.75    7.68
  25 -11   4   15.24    7.81
  25  -9   2   59.43    8.03
  25  -8   1    3.92    6.86
  25  -6  -3   25.10    6.48
  25  -6  -2   49.78    8.51
  25  -5  -6   29.15    6.69
  25  -5  -5   16.38    7.53
  26 -12   4   21.90    7.97
  26 -11   3  -12.44    8.14
  26 -10   2   11.39    8.06
  26  -9   1    7.01    7.76
  26  -8   0   25.86    8.79
  26  -7  -2   -5.32    9.80
  26  -6  -5   15.62    6.82
  27 -10   1    5.99    9.92
  27  -9  -1   -5.76    7.41
  27  -8  -2    0.99   10.07
  27  -7  -5    4.38    7.13
 -22 -19  -2   -8.61    7.08
 -22 -18  -3    2.15    7.73
 -22 -18  -2   19.46    6.09
 -22 -17  -4    6.05    8.13
 -22 -16  -6    3.81    8.28
 -22 -16  -5   -4.65    6.60
 -22 -15 -10   11.95    8.81
 -22 -15  -9    1.00    7.85
 -22 -15  -8   33.89    7.66
 -22 -15  -7   10.64    7.19
 -21 -20   1   -0.94    5.73
 -21 -19   1    0.42    4.95
 -21 -18   0    5.40    6.75
 -21 -17  -1    5.83    7.18
 -21 -16  -2    9.72    7.31
 -21 -15  -3  -10.37    6.45
 -21 -14  -6   41.16    8.83
 -21 -14  -5    2.25    6.76
 -21 -13 -11   -7.93    8.36
 -21 -13 -10   -1.65    7.81
 -21 -13  -9   11.77    7.74
 -21 -13  -8   71.06    8.08
 -20 -20   3    2.91    5.17
 -20 -18   2   11.42    4.41
 -20 -17   1   13.98    6.33
 -20 -16   0   76.77    6.77
 -20 -15  -1   12.79    6.85
 -20 -14  -2   13.29    6.97
 -20 -13  -4  117.55    8.29
 -20 -13  -3   -0.20    6.05
 -20 -12 -14   65.27    8.73
 -20 -12 -13   22.40    7.88
 -20 -12 -12   14.81    9.43
 -20 -12  -7   26.25    9.03
 -20 -12  -6  103.13    7.91
 -20 -12  -5    4.64    6.34
 -19 -19   4   22.61    3.93
 -19 -16   2    3.67    5.37
 -19 -15   1   15.15    5.93
 -19 -14   0   16.27    6.41
 -19 -13  -1   45.36    6.33
 -19 -12  -2   41.64    5.66
 -19 -11 -15    8.60    8.09
 -19 -11 -14   24.16    9.26
 -19 -11  -5   19.02    7.66
 -19 -11  -4   54.39    6.33
 -19 -10 -12   53.57    7.89
 -19 -10 -11   11.02    7.64
 -19 -10 -10   54.66    7.80
 -19 -10  -9   22.42    7.47
 -19 -10  -8   76.65    7.43
 -19 -10  -7   -2.55    6.80
 -18 -21   6   29.93    4.45
 -18 -17   4   -8.92    4.64
 -18 -14   2   62.20    4.67
 -18 -13   1   20.49    4.62
 -18 -12   0  266.02    6.34
 -18 -11 -17   15.07    9.34
 -18 -11  -2   -7.88    6.62
 -18 -10 -16    5.18    7.42
 -18 -10 -15   10.89    9.23
 -18 -10  -4   18.35    7.10
 -18 -10  -3   -6.39    5.28
 -18  -9 -13   35.30    7.48
 -18  -9 -12   19.70    7.71
 -18  -9 -11   13.52    9.92
 -18  -9 -10   21.73    8.93
 -18  -9  -9   36.64    8.67
 -18  -9  -8   44.54    8.60
 -18  -9  -7   77.74    8.68
 -18  -9  -6  141.36    7.26
 -17 -21   7   -1.19    3.68
 -17 -15   4  119.44    5.19
 -17 -10 -18    8.42    7.56
 -17 -10  -1   43.93    4.89
 -17  -9 -16   37.18    7.21
 -17  -9  -3    2.36    6.71
 -17  -8 -14   -2.01    7.24
 -17  -8 -13   16.48    6.74
 -17  -8 -12   12.17    8.44
 -17  -8  -6  166.54    8.75
 -17  -8  -5   30.63    6.02
 -16 -21   8   26.32    3.91
 -16 -12   3   16.91    3.41
 -16 -11   2   33.45    3.83
 -16 -10 -19   12.58    9.03
 -16  -9 -18    5.37    7.26
 -16  -9  -1    3.92    6.00
 -16  -8 -16   64.80    7.59
 -16  -8  -3   36.70    6.88
 -16  -7 -14    7.36    6.86
 -16  -7 -13   -6.65    8.66
 -16  -7  -6  210.04    8.72
 -16  -7  -5   65.15    5.63
 -15 -13   5   56.91    3.42
 -15 -12   4   28.70    3.98
 -15 -10   2   -0.03    4.37
 -15  -9 -20    9.92    7.76
 -15  -9   1   40.04    3.96
 -15  -8 -18   11.88    8.39
 -15  -7 -16   50.20    9.02
 -15  -6 -14   37.91    6.71
 -15  -6 -13   98.87    8.73
 -15  -6  -6  140.62    8.08
 -15  -6  -5  268.87    6.59
 -14 -19   9   -1.49    2.82
 -14 -13   6  164.26    3.52
 -14  -8 -20   11.65    7.07
 -14  -8   1  241.95    5.06
 -14  -7 -18   -6.48    8.02
 -14  -6 -16   23.10    6.42
 -14  -6  -3  190.22    6.54
 -14  -5 -13   67.03    6.63
 -14  -5 -12  137.79    8.98
 -14  -5  -6    4.66    4.85
 -13 -17   9    3.21    2.41
 -13 -15   8   36.08    2.46
 -13  -8 -21  -12.67    6.43
 -13  -7 -20   35.68    6.67
 -13  -7   1  178.11    4.43
 -13  -6 -18   -0.10    6.35
 -13  -6  -1  203.67    6.10
 -13  -5 -16    9.09    6.30
 -13  -5  -3   28.83    4.35
 -13  -4 -13    9.19    5.88
 -13  -4 -12  129.90    6.86
 -13  -4 -11   27.67    7.32
 -13  -4 -10   85.30    7.05
 -13  -4  -9   23.18    6.68
 -13  -4  -8  193.33    7.96
 -13  -4  -7   20.36    4.99
 -13  -4  -6  214.24    5.91
 -12 -21  11    5.93    1.88
 -12 -12   7    3.46    2.10
 -12  -7 -21    8.85    6.55
 -12  -7   2   68.31    4.00
 -12  -6 -19    4.54    7.77
 -12  -5 -18   12.32    6.34
 -12  -5  -1   76.96    4.00
 -12  -4 -15   16.10    6.10
 -12  -4  -4  193.42    6.37
 -12  -3 -11   33.58    5.04
 -12  -3 -10   66.08    5.20
 -12  -3  -9   71.17    5.22
 -12  -3  -8  293.75    6.34
 -11 -11   7   -1.65    1.93
 -11  -7 -22    3.58    6.76
 -11  -5 -19    6.03    5.90
 -11  -4 -17   15.21    5.88
 -11  -3 -14   99.00    6.08
 -11  -3  -5  297.75    7.12
 -10 -13   9   32.66    1.63
 -10  -7   4  115.93    2.86
 -10  -5 -20    1.17    7.50
 -10  -4 -18   53.44    7.64
 -10  -3 -16   63.10    7.45
 -10  -2 -12   50.12    6.46
 -10  -2  -7  315.05    7.42
 -10  -2  -6  668.95    7.03
  -9 -12   9   57.98    1.30
  -9  -3 -18   87.67    6.16
  -9  -3  -1  138.92    3.41
  -9  -2 -15   28.85    5.31
  -9  -2  -4  535.74    6.98
  -8  -5 -22    4.32    6.14
  -8  -3 -19    0.56    5.33
  -8  -3   0   79.30    3.51
  -8  -2 -17   18.95    4.91
  -8  -2  -2  201.09    3.67
  -8  -1 -13   14.69    5.01
  -8  -1  -6  291.09    6.09
  -7  -5   4  571.06    3.10
  -7  -3 -20   76.13    6.42
  -7  -3   1  108.82    2.88
  -7  -2 -18   29.92    5.03
  -7  -2  -1   78.30    3.64
  -7  -1 -15   13.95    4.95
  -6 -11  10   95.06    0.88
  -6  -2   0 2265.64    7.14
  -6   0 -13   11.05    4.25
  -6   0 -12   26.56    5.60
  -6   0  -6  947.49    6.28
  -5 -19  14    2.41    1.97
  -5 -12  11   25.00    1.37
  -5  -5 -24   22.98    6.03
  -5  -4   4    9.10    0.87
  -5  -2   1 2456.57    5.88
  -5   0 -15    0.72    4.22
  -5   0  -4  367.88    3.87
  -4 -22  15    8.18    2.64
  -4 -18  14    7.46    2.31
  -4   0 -16   57.87    4.46
  -4   0  -3    0.07    3.21
  -4   1 -11   18.96    3.60
  -4   1 -10    7.32    3.19
  -4   1  -9  419.42    4.62
  -4   1  -8  369.53    4.30
  -3 -17  14   17.91    2.81
  -3  -8   9  113.17    1.74
  -3  -2 -21   11.15    4.71
  -3  -1 -19   -3.62    6.37
  -3   0 -17    1.90    3.73
  -3   1 -13   30.27    4.65
  -2 -14  13   22.69    2.77
  -2 -12  12   30.98    2.41
  -2  -4 -24    0.03    6.00
  -1 -19  15   31.54    3.61
  -1  -1 -20  189.08    6.73
   0 -18  15   -1.72    3.62
   0 -13  13    4.64    3.33
   0  -7   9   -1.24    1.85
   0   1 -16   -2.04    4.19
   0   2 -11   -0.19    2.84
   0   2  -8 1502.99    5.78
   1 -15  14    2.46    3.92
   1  -8  10  850.90    5.42
   1  -3 -24    2.18    4.00
   1  -1 -21   -8.02    4.80
   2  -3 -24   20.74    4.72
   2   1 -17    2.71    3.65
   3 -21  16    5.61    4.10
   3 -17  15  -10.82    4.80
   3  -2 -23    1.00    3.87
   3   0   1    5.86    2.32
   4 -17  15   17.42    4.26
   4 -12  13   24.99    4.58
   4  -2 -23   -3.25    4.06
   5 -20  16    6.74    6.17
   5 -17  15   -2.86    3.98
   5 -14  14   53.84    5.80
   5 -12  13  -11.77    4.54
   5  -5   8  481.64    5.87
   5  -1   3  117.11    2.93
   5   1  -1  519.44    3.10
   6 -20  16   13.42    6.41
   6 -14  14    0.19    5.93
   6 -12  13   12.69    4.91
   6  -5   8  170.01    5.00
   6  -4   7   73.15    4.71
   6  -1   3   70.05    2.91
   6   1  -1   50.85    2.09
   6   2  -4  243.11    2.05
   7 -20  16   -9.99    5.53
   7 -17  15    0.91    4.68
   7 -14  14   70.41    6.54
   7 -12  13   14.78    5.22
   7  -5   8   58.98    4.82
   7  -2 -23   -0.49    3.11
   7  -1   3   68.44    4.05
   7   1  -1  297.35    3.16
   8 -20  16    8.65    5.98
   8 -17  15   36.28    4.92
   8 -14  14   22.43    5.77
   8 -12  13   87.17    5.94
   8  -9  11    1.05    4.13
   8  -2 -23    1.05    2.58
   8   0   1    3.37    2.61
   8   2 -14    7.47    1.04
   9 -17  15    2.38    6.17
   9  -9  11    2.67    4.39
   9   0   1   -2.16    3.84
   9   2  -5  282.38    2.78
  10 -15  14   29.16    5.42
  10 -11  12   88.72    5.32
  10  -9  11   -4.28    5.96
  10  -8  10   -0.19    4.59
  10  -2   4  606.29    6.37
  10  -1 -21    3.19    1.97
  11 -18  15    6.75    5.92
  11 -15  14    8.85    6.50
  11 -13  13   15.40    4.96
  11 -11  12  152.03    7.08
  11  -8  10  145.88    5.74
  11  -3   5  284.12    5.36
  11  -1   2  556.73    6.03
  11   1  -2  700.67    5.96
  12 -19  15   -6.83    6.00
  12 -18  15  -10.18    7.25
  12 -13  13    2.73    6.35
  12 -10  11   40.55    5.14
  12  -7   9   85.17    6.40
  12  -6   8   90.99    4.90
  12  -5   7   39.93    4.53
  12  -4   6  327.32    5.89
  12   0   0  327.11    5.81
  12   1  -3  137.75    3.66
  12   2 -10   23.44    1.80
  12   2  -9  129.11    2.52
  12   2  -8    2.28    2.00
  13 -19  15   -3.58    7.56
  13 -16  14   40.55    7.44
  13 -14  13    7.64    5.66
  13 -12  12   28.60    5.40
  13 -10  11    1.29    6.64
  13  -2   3   55.14    4.34
  14 -17  14   10.24    6.35
  14 -14  13  -14.40    6.88
  14 -12  12   -0.53    6.83
  14  -9  10  148.60    7.61
  14  -3   4   35.52    4.47
  14  -1   1  155.70    6.39
  14   1  -5  154.10    3.84
  15 -18  14   17.70    6.49
  15 -15  13    5.66    5.88
  15 -13  12   -2.26    5.83
  15 -11  11   15.98    5.75
  15  -8   9    8.40    6.74
  15  -7   8  154.59    6.22
  15  -6   7  318.85    6.53
  15  -5   6   31.31    4.62
  15  -4   5  115.92    6.91
  15  -2   2   11.33    4.24
  15  -1   0    8.32    3.90
  15   0  -2   88.17    5.49
  15   1  -6   38.22    4.11
  16 -18  14    0.59    7.90
  16 -16  13    8.61    6.13
  16 -10  10   34.88    5.50
  16  -3   3   48.38    4.62
  16   0  -3    7.79    4.83
  17 -17  13    3.47    6.04
  17 -14  12   25.29    8.37
  17 -12  11   12.85    7.25
  17  -9   9   39.71    7.37
  17  -8   8  111.95    6.14
  17  -7   7   -1.75    5.18
  17  -6   6  334.21    6.89
  17  -5   5    2.00    4.60
  17  -4   4   27.71    6.08
  17   0 -14   55.23    2.36
  17   0  -5   -0.71    3.71
  18 -15  12   40.30    7.68
  18 -13  11    9.64    6.18
  18 -10   9   -1.47    5.67
  18  -4   3   -4.18    4.68
  18  -2   0  171.77    7.29
  18  -1  -3   56.60    4.57
  18   0 -12   48.75    3.33
  18   0 -11   -6.01    2.66
  18   0  -8   62.42    3.71
  18   0  -7   -3.71    4.32
  19 -16  12    9.50    8.28
  19 -14  11   18.71    6.37
  19 -12  10   17.60    7.86
  19  -9   8    5.20    7.40
  19  -8   7  124.55    6.55
  19  -7   6   42.44    5.97
  19  -6   5   69.36    5.84
  19  -5   4   52.00    7.15
  19  -3   1   56.77    6.87
  19  -2  -1   25.03    6.33
  19  -1  -4  136.33    6.46
  20 -15  11    0.63    6.69
  20 -13  10    6.21    6.66
  20 -10   8   -1.89    6.31
  20  -9   7   -2.38    5.85
  20  -6   4   81.36    6.37
  20  -5   3    2.60    5.65
  20  -3   0  217.01    7.91
  20  -2  -3   33.84    4.86
  20  -1 -12   14.84    3.50
  20  -1  -7   31.51    4.33
  20  -1  -6   99.49    5.58
  21 -14  10    6.10    6.88
  21 -12   9    6.49    7.83
  21 -11   8   -3.90    6.35
  21  -5   2  153.35    6.86
  21  -3  -2  164.55    6.22
  21  -2 -14   28.10    2.92
  21  -2  -5    6.19    4.31
  21  -2  -4   82.00    6.18
  22 -15  10   31.30    8.77
  22 -13   9    3.50    8.42
  22 -12   8   39.53    6.93
  22  -9   6    2.90    8.54
  22  -8   5   35.85    8.51
  22  -7   4    7.70    7.76
  22  -5   1   11.57    5.92
  22  -4  -1   -3.66    5.62
  22  -3  -3   12.19    6.52
  22  -2 -11   -1.30    4.50
  22  -2 -10    6.02    4.76
  22  -2  -9   12.19    4.33
  22  -2  -8    4.22    5.37
  22  -2  -7    0.62    5.82
  23 -14   9   -2.37    8.24
  23 -13   8    3.83    6.73
  23 -11   7   13.29    8.44
  23 -10   6    0.26    7.98
  23  -9   5   45.52    6.84
  23  -8   4    5.01    7.08
  23  -7   3   13.79    8.70
  23  -5   0   16.55    8.53
  23  -4  -2  -16.46    6.69
  23  -3 -13   14.08    4.05
  23  -3  -6   16.79    5.33
  23  -3  -5   16.29    6.79
  24 -11   6  -16.62    8.49
  24 -10   5   20.16    6.79
  24  -9   4   -3.02    6.62
  24  -8   3    0.24    6.89
  24  -7   2   22.20    8.50
  24  -6   0   15.59    6.47
  24  -5  -2   84.64    6.75
  24  -4  -5   14.40    5.61
  24  -4  -4   51.56    7.52
  25 -12   6   10.46   10.02
  25 -11   5    1.24    7.20
  25 -10   4    2.12    7.31
  25  -9   3   -0.46    7.33
  25  -8   2    8.89    8.20
  25  -7   0    6.22    7.14
  25  -6  -1   15.70    8.12
  25  -5  -4  109.96    7.29
  25  -4 -11   -4.62    5.07
  25  -4 -10   44.81    5.60
  25  -4  -9   -5.06    6.17
  25  -4  -8   16.06    6.28
  26 -11   4    3.26    7.70
  26 -10   3   11.89    7.66
  26  -9   2   -5.61    9.21
  26  -7  -1   16.10    8.39
  26  -6  -4    9.16    6.65
  26  -6  -3   -2.15    8.61
  26  -5 -10   15.68    5.21
  26  -5  -9   -6.74    5.09
  26  -5  -8   28.83    5.95
  26  -5  -7  -10.82    7.95
  27 -10   2    3.95   10.07
  27  -9   0   12.59    7.86
  27  -8  -1   12.03    8.62
  27  -7  -4   15.13    7.45
  27  -7  -3    2.06    8.39
  27  -6  -8   25.48    6.30
  27  -6  -7  -11.47    7.68
  27  -6  -6   45.13    8.25
 -22 -18  -4   25.73    8.03
 -22 -17  -7    1.03    8.90
 -22 -17  -6    7.66    8.66
 -22 -17  -5    9.51    6.86
 -22 -16  -9   -2.79    7.73
 -22 -16  -8   15.11    7.54
 -22 -16  -7    5.85    7.06
 -21 -19   0   -5.47    6.68
 -21 -18  -1   -8.10    7.49
 -21 -17  -2  120.97    9.00
 -21 -16  -3    1.00    6.27
 -21 -15  -5    2.39    8.17
 -21 -15  -4    6.19    6.60
 -21 -14 -12   14.47    8.80
 -21 -14 -11   -4.38    8.15
 -21 -14 -10   -5.25    8.01
 -21 -14  -9   -9.88    7.62
 -21 -14  -8   -1.03    7.19
 -21 -14  -7   14.17    7.13
 -20 -21   3    4.83    5.25
 -20 -19   2   29.39    4.65
 -20 -18   1    3.24    5.71
 -20 -15  -2    4.59    7.42
 -20 -14  -3   30.40    7.59
 -20 -13 -14   14.58    8.24
 -20 -13 -13    0.46    9.58
 -20 -13 -12   -9.46   10.15
 -20 -13  -6   63.17    9.09
 -20 -13  -5   -0.51    6.33
 -20 -12 -11    2.73    7.70
 -20 -12 -10    5.58    7.94
 -20 -12  -9    3.44    7.48
 -20 -12  -8   13.72    7.33
 -19 -20   4    1.27    4.94
 -19 -18   3   -4.88    5.08
 -19 -13  -2   61.37    7.85
 -19 -12 -15    6.18    8.36
 -19 -12 -14   46.92    9.95
 -19 -12  -4   21.13    7.69
 -19 -12  -3   27.08    5.79
 -19 -11 -13    7.84    7.45
 -19 -11 -12    3.00    8.06
 -19 -11 -11   -1.86    9.50
 -19 -11 -10   30.18    9.74
 -19 -11  -9   23.74    8.67
 -19 -11  -8    9.92    8.58
 -19 -11  -7   27.05    8.54
 -19 -11  -6   39.75    6.70
 -18 -19   5   10.60    3.75
 -18 -16   3   17.60    5.39
 -18 -12  -1   23.72    6.00
 -18 -11 -16    4.76    7.52
 -18 -11 -15    7.46    9.10
 -18 -11  -3   79.92    7.44
 -18 -10 -14    0.32    7.36
 -18 -10 -13  -13.68    9.10
 -18 -10  -5   20.29    7.68
 -17 -22   7   -3.94    3.66
 -17 -19   6   -1.50    4.32
 -17 -17   5    6.09    4.49
 -17 -14   3   31.63    4.80
 -17 -13   2  176.55    6.51
 -17 -12   1   -3.37    5.03
 -17 -11 -18   15.47    7.87
 -17 -11   0  109.75    5.05
 -17 -10 -17   -4.18    7.43
 -17 -10 -16   15.61    9.97
 -17 -10  -2   -0.49    6.34
 -17  -9 -15   -0.23    7.12
 -17  -9 -14    9.55    8.96
 -17  -9  -4   65.54    5.88
 -17  -8 -11   12.06    7.00
 -17  -8 -10   -1.21    6.69
 -17  -8  -9   18.67    6.59
 -17  -8  -8   89.97    7.13
 -17  -8  -7   28.74    6.66
 -16 -22   8    5.05    3.45
 -16 -19   7   18.38    3.61
 -16 -15   5   13.80    3.88
 -16 -10 -18   51.71    9.32
 -16 -10   0  196.49    6.91
 -16  -9 -17   10.35    7.20
 -16  -8 -15   -0.07    6.99
 -16  -8 -14  152.71    9.81
 -16  -8  -4  142.58    7.92
 -16  -7 -12  -15.23    6.31
 -16  -7 -11   26.54    6.68
 -16  -7 -10   12.25    6.33
 -16  -7  -9    3.58    6.32
 -16  -7  -8   70.56    6.71
 -16  -7  -7  118.22    6.90
 -15 -22   9    8.32    3.15
 -15 -19   8   -1.88    2.96
 -15 -15   6   30.54    3.59
 -15 -11   3    3.20    3.07
 -15  -9 -19    1.97    6.90
 -15  -8 -17    1.49    6.83
 -15  -8  -1   54.72    4.82
 -15  -7 -15   36.92    6.43
 -15  -7  -3  235.91    6.38
 -15  -6 -12   61.63    6.71
 -15  -6 -11   57.46    6.64
 -15  -6 -10   89.42    6.70
 -15  -6  -9   51.63    5.77
 -15  -6  -8   30.23    5.54
 -15  -6  -7  347.49    7.59
 -14 -17   8  102.30    3.65
 -14 -15   7    5.96    3.06
 -14 -12   5   40.88    2.81
 -14 -11   4  106.45    4.34
 -14 -10   3    5.68    4.15
 -14  -9 -20    3.10    8.66
 -14  -9   2   24.62    3.37
 -14  -8 -19    0.32    6.59
 -14  -7 -17    3.99    6.68
 -14  -7  -1  198.70    5.26
 -14  -6 -15   17.86    6.44
 -14  -6 -14    5.33    7.97
 -14  -6  -4  265.54    7.33
 -14  -5 -11   25.62    6.06
 -14  -5 -10  186.91    6.48
 -14  -5  -9  184.66    6.35
 -14  -5  -8   43.94    5.50
 -14  -5  -7  125.02    5.88
 -13 -20  10    1.07    2.27
 -13 -12   6  385.18    4.20
 -13 -11   5  144.71    3.69
 -13  -9   3   99.88    4.07
 -13  -8 -20   28.66    8.06
 -13  -8   2   62.11    3.44
 -13  -7 -19    7.01    6.14
 -13  -6 -17    9.17    6.15
 -13  -5 -15   -1.66    6.40
 -13  -5 -14   20.84    7.48
 -13  -5  -4   50.58    4.76
 -12 -18  10    0.60    1.97
 -12 -11   6  442.55    4.59
 -12  -8 -21    4.75    7.75
 -12  -8   3  246.86    4.65
 -12  -7 -20    4.78    6.61
 -12  -5 -17   17.42    6.05
 -12  -5 -16   11.97    7.58
 -12  -5  -2    7.38    5.05
 -12  -4 -14  102.28    6.67
 -12  -4 -13   45.42    7.01
 -12  -4  -5   22.58    6.24
 -11 -23  12    3.30    1.52
 -11 -10   6   76.12    2.42
 -11  -8   4   20.74    2.57
 -11  -7 -21    0.70    7.80
 -11  -7   3  130.52    3.06
 -11  -6 -20    3.14    6.30
 -11  -5 -18   24.79    7.80
 -11  -5   0   29.25    3.35
 -11  -4 -16   85.77    6.47
 -11  -4  -2  314.07    5.15
 -11  -3 -13   31.30    5.57
 -11  -3 -12   33.98    6.63
 -11  -3  -6  454.16    6.63
 -10  -9   6   83.99    2.10
 -10  -8   5  139.41    2.62
 -10  -7 -22   18.68    8.27
 -10  -5 -19   -0.40    7.63
 -10  -5   1  168.57    3.95
 -10  -3 -15   21.73    5.74
 -10  -3  -3  767.69    6.73
 -10  -2 -11   13.17    4.59
 -10  -2 -10   11.34    4.48
 -10  -2  -9   78.35    4.93
 -10  -2  -8   36.38    4.59
  -9  -7 -23    8.76    6.56
  -9  -3 -17   50.92    5.87
  -9  -2 -14  107.59    5.80
  -9  -2 -13   58.81    6.88
  -8  -2 -16    5.88    4.85
  -8  -1 -12  265.70    5.76
  -8  -1 -11  135.36    5.00
  -8  -1 -10  639.70    8.40
  -8  -1  -9   47.09    6.07
  -8  -1  -8  498.31    7.49
  -8  -1  -7   40.87    4.08
  -7 -22  14    1.72    1.41
  -7  -5 -22   15.53    8.55
  -7  -3 -19   -2.13    6.45
  -7  -1 -14   44.23    4.98
  -7  -1  -4  455.08    5.02
  -6 -17  13    3.26    1.37
  -6  -5 -23    6.21    5.76
  -6   0 -11    2.29    3.64
  -6   0 -10  586.44    7.05
  -6   0  -9   -4.00    4.67
  -6   0  -8  360.97    5.20
  -6   0  -7   -4.05    2.89
  -5 -16  13   41.27    1.98
  -5  -4 -22   16.00    6.84
  -5  -2 -19   21.01    6.14
  -5  -1 -17   44.74    4.61
  -5   0 -14   86.99    4.73
  -5   0 -13   -3.09    5.16
  -5   0  -5    6.69    3.67
  -4 -13  12  173.08    2.63
  -4  -5 -24   13.90    6.78
  -4  -4 -23   -3.82    5.34
  -4  -2 -20   20.23    5.22
  -4   0 -15   -9.08    3.96
  -3 -20  15   -5.96    2.99
  -3  -3 -22   -3.38    4.61
  -3   0 -16   59.69    5.23
  -3   0  -2  516.82    3.18
  -3   1  -6  527.92    4.14
  -2 -19  15   11.15    3.41
  -2 -16  14   35.04    3.20
  -2  -2 -21   -8.81    4.36
  -2  -1   1  677.43    1.71
  -2   1 -14  253.71    4.72
  -1  -6   8 1760.62    5.57
  -1  -5   7    3.47    1.55
   0 -22  16   36.93    4.06
   0 -15  14   26.81    3.65
   0 -11  12   39.20    3.17
   0  -8  10   31.31    2.85
   0  -3 -23    4.92    5.11
   0  -3   5   -3.19    1.18
   0  -1 -20  151.41    6.14
   0  -1   2 3248.70    3.88
   0   0 -18   18.09    4.92
   1 -21  16   25.30    4.38
   1 -17  15    9.71    4.06
   1  -9  11   24.23    3.30
   1   2 -12  491.87    4.14
   2 -20  16    4.21    4.56
   2 -17  15   10.21    3.69
   2  -1 -21    5.46    3.56
   2   0 -19   -1.66    4.06
   3 -20  16   15.41    4.95
   3 -14  14   81.56    4.98
   3 -12  13   30.44    3.52
   3  -5   8  582.49    5.20
   3  -3 -24   10.13    4.43
   3  -1 -21    5.67    4.10
   4 -10  12   75.52    4.59
   4  -6   9   10.94    4.05
   4  -5   8 1223.99    6.78
   4  -4   7   -2.38    2.42
   4  -1   3  117.01    2.78
   4   1  -1  654.20    2.89
   4   2 -14  534.08    4.02
   5 -19  16   26.84    5.35
   5 -16  15   36.88    5.31
   5 -10  12   52.08    3.88
   5  -7  10   66.61    4.68
   5  -6   9   82.92    3.79
   5  -4   7  236.16    3.85
   5  -3 -24   17.30    3.73
   5  -3   6  490.57    5.29
   5   2 -14   32.47    2.11
   5   2  -4  195.63    1.50
   6 -19  16   18.50    6.10
   6 -16  15    9.05    5.37
   6 -10  12   49.27    4.23
   6  -7  10  613.50    7.31
   6  -6   9    4.38    3.30
   6  -3   6  314.82    4.20
   7 -19  16   28.51    5.75
   7 -16  15   12.40    5.73
   7 -10  12   82.00    4.65
   7  -7  10  108.84    5.71
   7  -6   9   33.65    3.63
   7  -4   7  328.13    5.00
   7  -3   6   27.77    3.09
   7   2  -4   42.71    1.40
   8 -19  16    6.02    5.96
   8 -16  15    7.91    6.77
   8 -10  12   76.06    4.71
   8  -7  10   79.00    5.52
   8  -6   9  181.52    4.79
   8  -5   8  104.97    4.20
   8  -4   7  139.11    4.33
   8  -3   6  112.61    5.10
   8  -1   3   96.97    3.32
   8   1  -1   10.27    2.22
   8   2  -4  100.29    2.35
   9 -20  16   13.78    5.45
   9 -16  15   -9.98    6.30
   9 -14  14   23.91    5.42
   9 -12  13   70.97    4.94
   9 -10  12  139.86    7.16
   9  -6   9  170.93    6.30
   9  -5   8  466.61    6.12
   9  -4   7  158.00    4.67
   9  -1   3   42.75    3.18
   9   1 -17    6.99    1.48
   9   1  -1  373.96    4.57
  10 -20  16  -13.70    7.00
  10 -17  15    9.35    5.34
  10 -14  14   53.05    6.79
  10 -12  13   48.42    6.01
  10  -5   8  161.88    6.09
  10   0   1   -7.12    3.38
  10   2  -5  351.23    3.78
  11 -17  15    4.72    6.95
  11  -9  11  107.02    5.53
  11  -2   4  634.63    6.68
  11   2  -6  315.35    3.36
  12 -17  15   -9.13    7.70
  12 -15  14   22.26    5.70
  12 -11  12   94.87    5.70
  12  -8  10   25.07    4.95
  12  -3   5  129.89    4.87
  12  -1   2  114.37    4.44
  12   2 -11   69.88    1.80
  12   2  -7  261.95    3.67
  13 -18  15   -1.13    7.33
  13 -15  14   -3.45    7.71
  13 -13  13   -8.88    5.29
  13 -11  12  130.09    7.80
  13  -8  10  293.56    8.01
  13  -7   9   22.51    4.65
  13  -6   8   44.50    4.63
  13  -5   7   26.21    4.50
  13  -4   6  174.81    5.33
  13  -3   5  131.56    6.15
  13   1  -3  130.70    3.90
  14 -16  14    1.69    6.17
  14 -10  11   -6.27    5.23
  14  -6   8   15.48    6.00
  14  -5   7  115.35    6.49
  14  -2   3  410.60    6.43
  14   0  -1    0.15    3.43
  14   1  -4   13.78    3.23
  15 -17  14   10.87    6.14
  15 -14  13  -14.16    7.18
  15 -12  12   52.95    7.51
  15  -9  10    3.78    5.36
  15  -3   4  172.65    5.53
  15   1 -13   20.34    1.87
  15   1  -5    8.67    4.46
  16 -17  14   47.27    8.09
  16 -15  13    6.06    5.98
  16 -13  12   45.85    6.14
  16 -11  11   30.40    6.11
  16  -8   9   -9.00    6.69
  16  -7   8   77.56    5.27
  16  -6   7   68.39    5.21
  16  -5   6  105.19    5.26
  16  -4   5   70.41    6.82
  16  -2   2   75.50    6.01
  16  -1   0   26.02    4.27
  16   0 -16   43.54    1.86
  16   1 -11    1.80    3.05
  16   1 -10   94.61    3.66
  16   1  -9   18.73    2.59
  16   1  -8  122.11    4.19
  16   1  -7   19.70    3.70
  17 -16  13   -1.58    6.10
  17 -10  10   78.75    6.65
  17  -3   3   27.35    6.24
  17  -2   1   19.78    4.55
  17  -1  -1    9.43    4.61
  17   0  -4  135.31    4.73
  18 -17  13   10.23    6.03
  18 -16  13    7.91    7.70
  18 -14  12    3.22    7.39
  18 -12  11    7.55    7.72
  18 -11  10   75.52    6.43
  18  -9   9   15.94    7.19
  18  -8   8   45.32    5.92
  18  -7   7   98.97    6.12
  18  -6   6  248.35    7.18
  18  -5   5   14.85    4.95
  18  -3   2   13.99    4.71
  18  -1  -2   26.62    4.64
  18   0 -13   -1.33    2.59
  18   0  -6  314.26    5.49
  19 -15  12   19.93    8.10
  19 -13  11   -0.07    7.84
  19 -10   9   22.21    5.81
  19  -4   3   21.96    5.40
  19  -1 -15   23.63    2.46
  19  -1  -3   17.06    6.29
  20 -14  11   11.24    6.68
  20 -12  10    1.01    7.83
  20 -11   9   -4.18    6.26
  20  -8   7   17.58    8.47
  20  -7   6   37.44    7.46
  20  -6   5    7.92    7.91
  20  -4   2  199.59    6.78
  20  -2  -2  158.09    5.96
  20  -1 -13   10.63    3.13
  20  -1  -5   41.31    5.45
  21 -15  11   -1.28    7.08
  21 -13  10  -17.54    8.19
  21 -10   8   79.05    8.46
  21  -9   7    2.48    5.92
  21  -8   6   29.50    6.16
  21  -7   5   19.86    6.03
  21  -6   4   -5.26    5.77
  21  -5   3   23.09    7.27
  21  -4   1   14.29    5.68
  21  -3  -1    3.98    5.41
  21  -2 -15   -1.87    2.64
  21  -2  -3   14.67    5.80
  21  -1  -9   -0.63    4.72
  22 -14  10   27.03    8.24
  22 -11   8   19.93    6.71
  22 -10   7   16.33    6.32
  22  -6   3    0.87    6.06
  22  -5   2   38.03    7.53
  22  -4   0  271.30    7.62
  22  -3 -16    3.39    2.72
  22  -3  -2   20.90    6.68
  22  -2 -13    9.46    3.62
  22  -2 -12    4.80    3.15
  22  -2  -6   11.29    4.75
  22  -2  -5   12.67    6.23
  23 -12   8   10.01    6.79
  23  -6   2    9.35    6.02
  23  -4  -1   18.56    7.28
  23  -3 -14   23.97    3.69
  23  -3  -4   25.24    6.41
  24 -13   8    8.06    7.32
  24 -12   7   18.24    7.27
  24 -10   6    8.88    8.21
  24  -9   5  -11.72    8.24
  24  -8   4   41.90    8.83
  24  -6   1   11.39    6.33
  24  -5  -1    5.77    6.15
  24  -4  -3   31.02    7.39
  24  -3 -11   15.64    4.57
  24  -3 -10   24.07    5.20
  24  -3  -9   13.28    5.39
  24  -3  -8   29.11    5.90
  24  -3  -7    0.33    5.90
  25 -10   5   31.41    9.12
  25  -9   4   23.68    8.66
  25  -7   1   33.87    7.01
  25  -6   0   23.16    8.38
  25  -5  -3   15.06    6.41
  25  -5  -2   -2.61    7.71
  25  -4 -12   22.83    4.54
  25  -4  -7    6.74    5.61
  25  -4  -6   14.98    6.95
  26 -11   5  -12.43    9.10
  26 -10   4   -5.82    9.19
  26  -9   3   20.54    9.20
  26  -8   1   -4.37    6.65
  26  -7   0  -13.17    8.04
  26  -6  -2   17.60    8.29
  26  -5  -6   24.56    6.27
  26  -5  -5   18.46    8.35
  27  -9   1   13.58    7.83
  27  -8   0   17.75    8.73
  27  -7  -2   39.34    7.60
  27  -6  -5    2.38    6.56
  27  -6  -4  -15.02    8.50
 -22 -18  -5   -9.51    6.97
 -21 -20   0    7.26    5.47
 -21 -19  -1    7.05    6.75
 -21 -18  -2  -12.20    7.87
 -21 -17  -3    2.80    7.74
 -21 -16  -5    4.62    8.09
 -21 -16  -4    6.64    6.53
 -21 -15 -11   -3.68    8.16
 -21 -15 -10   20.16    8.25
 -21 -15  -9    1.19    7.87
 -21 -15  -8   31.92    7.32
 -21 -15  -7   10.74    7.24
 -21 -15  -6   -3.87    7.15
 -20 -20   2   -9.62    4.72
 -20 -17   0   -3.11    5.07
 -20 -16  -1    3.50    5.39
 -20 -15  -3   -0.55    7.52
 -20 -14 -13    2.60   10.00
 -20 -14  -5    8.15    7.97
 -20 -14  -4   84.04    6.86
 -20 -13 -11   -9.61    8.07
 -20 -13 -10    5.47    8.05
 -20 -13  -9   -2.95    7.28
 -20 -13  -8    8.29    7.52
 -20 -13  -7   -3.40    7.08
 -19 -21   4   -0.24    4.79
 -19 -19   3    2.59    4.88
 -19 -17   2   43.82    4.73
 -19 -16   1   31.07    4.77
 -19 -15   0    0.15    5.24
 -19 -14  -1   33.29    5.59
 -19 -13 -15   30.56    8.53
 -19 -13  -3   21.07    7.15
 -19 -12 -13    3.07    7.80
 -19 -12 -12   47.71   10.81
 -19 -12  -6   57.97    8.61
 -19 -12  -5    3.84    6.30
 -18 -20   5   -6.10    4.34
 -18 -18   4    4.67    4.60
 -18 -15   2    6.22    4.25
 -18 -14   1    7.64    4.70
 -18 -13   0   31.43    4.91
 -18 -12 -16   16.17    7.78
 -18 -12  -2  111.11    6.96
 -18 -11 -14   30.97    7.58
 -18 -11  -4    9.14    7.61
 -18 -10 -12  -18.96    7.45
 -18 -10 -11   10.45    7.51
 -18 -10 -10   30.32    7.10
 -18 -10  -9   17.24    8.81
 -18 -10  -8   -5.55    6.96
 -18 -10  -7   63.11    7.03
 -18 -10  -6   -4.46    6.22
 -17 -16   4    2.20    4.38
 -17 -11 -17   11.69    7.63
 -17 -11  -1   23.96    6.08
 -17 -10 -15   -0.36    7.01
 -17 -10  -3   33.27    7.41
 -17  -9 -13    9.78    7.33
 -17  -9 -12    3.21    7.44
 -17  -9 -11   -8.02    8.45
 -17  -9  -7  -15.58    7.92
 -17  -9  -6   36.50    8.01
 -17  -9  -5    9.88    6.27
 -16 -17   6   77.14    3.62
 -16 -14   4   36.97    3.66
 -16 -13   3   24.21    4.76
 -16 -12   2  125.24    5.61
 -16 -10 -17   25.22   10.15
 -16  -9 -16    9.00    7.66
 -16  -9 -15   -3.54    8.54
 -16  -9  -2    2.32    5.00
 -16  -8 -13   22.30    6.52
 -16  -8 -12   13.20    8.48
 -16  -8  -5   -7.21    5.62
 -15 -17   7   35.36    3.37
 -15 -10 -19   -0.82    6.96
 -15  -9 -18   13.16    7.42
 -15  -9   0  213.47    5.52
 -15  -8 -16   16.03    7.40
 -15  -8  -2    8.65    4.88
 -15  -7 -14   10.52    6.51
 -15  -7 -13   28.17    6.52
 -15  -7  -5  184.37    8.11
 -15  -7  -4  107.61    5.44
 -14  -9 -19   18.59    9.47
 -14  -8 -18   49.91    7.34
 -14  -8   0  708.55    7.22
 -14  -7 -16   11.55    6.58
 -14  -7  -2   22.51    5.92
 -14  -6 -13   26.28    6.09
 -14  -6  -5  130.43    7.21
 -13 -10   4  164.21    3.47
 -13  -8 -19   -1.04    7.64
 -13  -7 -18   39.79    6.95
 -13  -7   0  419.66    5.80
 -13  -6 -16    2.78    6.12
 -13  -6  -2   37.62    4.15
 -13  -5 -13   32.56    6.19
 -13  -5 -12    0.53    7.53
 -13  -5  -5   42.06    4.75
 -12 -14   8   37.73    2.32
 -12 -10   5   78.29    3.14
 -12  -9   4    8.21    2.34
 -12  -7 -19   -0.36    8.68
 -12  -6 -18   11.17    6.21
 -12  -6   0  541.68    5.90
 -12  -5 -15   20.55    7.88
 -12  -4 -12   40.12    5.38
 -12  -4 -11   -3.98    6.79
 -12  -4  -7   43.48    6.39
 -12  -4  -6  328.92    6.35
 -11 -19  11    0.19    1.55
 -11  -9   5  218.22    2.94
 -11  -6 -19   -4.41    6.09
 -11  -5 -17    4.79    7.39
 -11  -4 -15    3.83    5.72
 -11  -4  -3  268.50    5.20
 -11  -3 -11   19.24    4.89
 -11  -3 -10    8.85    4.63
 -11  -3  -9   51.87    4.92
 -11  -3  -8  388.72    6.66
 -11  -3  -7  302.80    6.05
 -10 -15  10  111.04    1.73
 -10  -4 -17   16.98    5.81
 -10  -4  -1  121.85    3.56
 -10  -3 -14   12.95    5.23
 -10  -3  -4  729.54    6.93
  -9  -6 -21    3.60    7.93
  -9  -5 -20    2.39    5.83
  -9  -5   2  137.29    2.59
  -9  -3 -16  112.65    6.27
  -9  -3  -2  215.02    4.02
  -9  -2 -12  103.09    5.12
  -9  -2  -6  426.33    6.97
  -9  -2  -5  263.12    4.80
  -8  -7 -23   10.12    8.40
  -8  -5   3  107.52    2.00
  -8  -4 -19   54.74    7.05
  -8  -2 -15   21.31    5.02
  -8  -2  -3  270.48    4.11
  -7 -18  13   40.38    1.14
  -7  -6 -23   -5.44    6.26
  -7  -6   5    8.19    1.29
  -7  -4 -20   15.89    6.89
  -7  -2 -16    4.43    6.69
  -7  -1 -13   23.85    4.79
  -7  -1 -12   78.49    5.84
  -7  -1  -5  113.95    3.52
  -6 -20  14    5.00    1.65
  -6  -5 -22    1.76    7.46
  -6  -4 -21   -2.95    5.59
  -6  -1 -15   79.84    5.18
  -6  -1  -3   87.27    2.98
  -5  -6 -24   12.41    6.94
  -5  -5 -23   -5.64    5.71
  -5  -1 -16  185.17    6.52
  -5   0 -12  132.93    5.75
  -4 -15  13   47.79    2.07
  -4  -2 -19   25.65    6.09
  -4  -1 -17   17.13    5.80
  -4   0 -14  218.61    6.13
  -3  -5 -24   17.87    6.23
  -3  -4 -23   -1.81    4.93
  -3  -2 -20    9.66    4.84
  -3  -1 -18   77.93    4.59
  -3   1 -11    9.16    3.32
  -3   1 -10   33.80    2.80
  -3   1  -9  128.13    4.07
  -3   1  -8   41.64    2.67
  -3   1  -7  128.85    2.93
  -2 -10  11    7.04    1.94
  -2   1 -13    7.62    3.28
  -2   1  -5  542.13    3.63
  -1 -22  16    7.53    3.45
  -1 -13  13   24.83    3.25
  -1  -2 -21    6.16    5.33
  -1   0 -17    3.66    5.02
   0 -21  16   26.25    3.79
   0  -4 -24    6.69    5.39
   1 -20  16   20.92    4.32
   1 -14  14   55.21    4.34
   1  -3 -23    0.28    4.85
   1  -1 -20  186.36    5.91
   1   0 -18  221.95    5.73
   1   2 -11   12.01    2.09
   2 -14  14   52.10    3.76
   2 -10  12   28.64    3.80
   2  -2 -22   10.25    4.80
   2   1 -16   55.80    3.63
   3 -19  16    3.74    5.14
   3  -6   9    8.68    2.82
   3  -4   7   25.32    2.34
   3  -1   3  390.10    3.25
   3   0 -19   -3.11    3.69
   4 -19  16   10.80    4.19
   4  -7  10  597.85    5.73
   4  -3   6 1008.51    5.67
   4  -1 -21   15.19    3.67
   5 -13  14   28.16    5.31
   6 -18  16   37.32    5.79
   6 -13  14   76.20    6.08
   6 -11  13   15.84    4.96
   6  -8  11   63.64    5.55
   6  -2   5  125.49    4.25
   6   2 -14  160.48    2.12
   7 -18  16    8.94    5.65
   7 -13  14   29.61    5.69
   7 -11  13   16.77    5.22
   7  -8  11   63.96    5.85
   7  -2   5   87.16    4.30
   7   2 -14   78.85    1.61
   8 -18  16   24.16    6.10
   8 -13  14   52.19    6.40
   8 -11  13  122.35    6.13
   8  -8  11    6.68    5.78
   8  -2   5   23.86    4.81
   8  -1 -21    6.54    2.47
   8   1 -17   26.18    1.89
   9 -19  16    7.63    5.34
   9 -13  14   19.07    6.20
   9  -7  10   31.35    4.61
   9  -3   6  256.81    5.11
   9  -1 -21    1.04    2.34
   9   2  -4  533.00    4.17
  10 -19  16   20.59    5.69
  10 -16  15    2.54    5.23
  10 -10  12   12.43    4.61
  10  -7  10  111.94    6.46
  10  -6   9   11.32    4.02
  10  -4   7   20.32    4.04
  10  -3   6  171.51    4.88
  10  -1   3  442.82    5.57
  10   1  -1  351.69    4.07
  11 -19  16   14.39    7.03
  11 -16  15   -1.05    6.80
  11 -14  14   18.15    5.40
  11 -12  13   17.04    5.00
  11 -10  12   99.57    5.41
  11  -6   9   17.50    5.65
  11  -5   8  128.71    4.93
  11  -4   7   62.73    5.65
  11  -1   3  126.15    5.74
  11   0   1   -0.03    3.52
  11   2  -5  204.28    3.62
  12 -14  14   55.05    7.01
  12 -12  13    4.71    5.20
  12  -9  11   22.02    4.99
  12  -2   4  163.36    4.96
  12   1  -2   79.24    3.44
  12   2 -12   21.15    1.57
  12   2  -6  278.64    4.00
  13 -17  15  -15.04    7.41
  13  -9  11   31.07    6.71
  13  -2   4   32.71    5.96
  13  -1   2  362.80    5.79
  13   0   0  262.85    4.88
  13   2 -10   61.10    2.18
  13   2  -9  182.34    3.04
  13   2  -8  321.77    3.77
  14 -18  15    3.64    6.34
  14 -15  14   10.36    5.85
  14 -13  13   16.47    5.58
  14 -11  12   27.86    5.53
  14  -8  10   27.37    6.33
  14  -7   9   44.47    4.99
  14  -4   6   25.96    4.51
  14  -3   5  355.21    7.78
  14   1  -3   44.04    4.46
  15 -16  14   -2.53    6.32
  15 -13  13    4.53    7.17
  15 -10  11   12.93    5.56
  15  -7   9   27.49    6.68
  15  -6   8   79.20    7.03
  15  -5   7  179.95    7.32
  15  -2   3   81.13    4.88
  15  -1   1   35.88    4.30
  15   0 -17   -0.83    1.07
  15   0  -1    4.56    3.92
  15   1  -4  246.04    5.46
  16 -16  14   28.59    8.98
  16 -14  13    3.27    6.04
  16 -12  12   27.76    6.04
  16  -9  10   65.98    5.96
  16  -3   4   76.38    4.98
  16   0  -2   23.38    4.06
  16   1 -12   97.47    3.00
  16   1  -6   68.59    4.28
  17 -17  14   -7.52    8.36
  17 -15  13   -1.67    6.01
  17 -13  12   29.06    6.17
  17 -11  11  -11.17    5.52
  17  -8   9   10.64    6.94
  17  -7   8  261.36    7.07
  17  -6   7   16.48    4.86
  17  -5   6  154.33    5.78
  17  -4   5   23.37    6.19
  17  -2   2   21.22    6.45
  17  -1   0    4.27    6.36
  17   0 -15   -1.58    1.85
  17   0  -3   -3.99    4.01
  18 -15  13   -9.27    7.65
  18 -13  12   36.72    7.72
  18 -10  10   23.97    5.89
  18  -4   4   32.87    5.05
  18  -3   3   58.92    6.67
  18  -2   1  113.75    5.74
  18  -1  -1   15.09    6.05
  18   0  -5   -9.23    3.66
  18   0  -4    4.64    5.12
  19 -16  13   -1.46    7.92
  19 -14  12   19.30    7.59
  19 -12  11   -5.98    7.98
  19 -11  10   28.94    6.31
  19  -9   9   14.85    7.43
  19  -8   8   64.54    6.23
  19  -7   7   -1.59    5.71
  19  -6   6   61.02    5.98
  19  -5   5    1.93    7.34
  19  -3   2  187.37    6.15
  19  -2 -18    2.43    1.55
  19  -2   0  116.90    5.62
  19  -1  -2  102.06    6.67
  19   0 -11   -3.58    3.70
  19   0 -10    3.39    3.01
  19   0  -9    2.95    3.32
  19   0  -8  174.18    4.78
  19   0  -7    4.64    4.68
  20 -15  12   10.76    8.30
  20 -13  11  -19.72    7.81
  20 -10   9   -6.59    6.45
  20  -9   8   31.05    6.14
  20  -5   4   11.27    5.61
  20  -4   3   14.61    7.13
  20  -3   1   11.15    5.34
  20  -2 -17    5.55    2.18
  20  -2  -1    8.14    4.91
  20  -1 -14   28.24    3.36
  20  -1  -4   59.46    4.74
  21 -14  11    8.88    6.70
  21 -12  10   22.70    8.10
  21 -11   9   17.76    6.70
  21  -8   7  -15.19    7.89
  21  -7   6   -7.71    7.39
  21  -4   2   48.88    7.35
  21  -3   0   83.46    6.18
  21  -2  -2   63.76    6.55
  21  -1 -12   16.72    3.68
  21  -1 -11   -8.46    3.98
  21  -1 -10   -1.54    3.30
  21  -1  -8   24.21    4.21
  21  -1  -7  -11.48    4.27
  21  -1  -6    3.90    5.70
  22 -13  10   36.15    8.47
  22 -12   9   -6.01    6.86
  22 -10   8   14.92    8.12
  22  -9   7   55.66    6.85
  22  -8   6    2.84    6.50
  22  -7   5   17.81    5.99
  22  -6   4   16.00    8.39
  22  -4   1   -1.78    6.99
  22  -3  -1   14.80    7.53
  22  -2 -14    2.74    3.14
  22  -2  -4   34.87    6.64
  23 -13   9    9.06    7.00
  23 -11   8   -9.51    8.03
  23 -10   7   13.74    6.65
  23  -9   6   17.89    6.66
  23  -8   5    7.44    6.72
  23  -7   4   28.88    7.00
  23  -6   3  -15.68    7.50
  23  -5   1   -8.10    6.07
  23  -3 -15   11.16    3.04
  23  -3  -3   10.26    5.11
  23  -2 -11   19.81    4.36
  23  -2 -10   11.45    5.04
  23  -2  -9    9.98    5.19
  23  -2  -8   52.03    5.56
  23  -2  -7    8.12    5.88
  24 -12   8   -5.44    8.71
  24 -11   7    4.25    6.82
  24  -7   3   38.81    6.78
  24  -6   2   14.59    7.90
  24  -5   0   -5.36    6.27
  24  -4  -2   16.18    5.81
  24  -3 -13   15.28    3.84
  24  -3 -12   -0.86    3.37
  24  -3  -6   35.16    5.55
  24  -3  -5   27.03    7.94
  25 -12   7   19.89    7.68
  25 -11   6    0.40    6.91
  25  -8   3   10.27    7.01
  25  -7   2   45.86    6.93
  25  -5  -1   43.45    7.86
  25  -4  -5    6.93    5.80
  25  -4  -4   43.71    7.62
  26  -8   2   11.32    7.21
  26  -7   1   13.43    9.50
  26  -6  -1   43.04    6.79
  26  -5  -4   -5.62    6.31
  26  -5  -3   44.82    8.30
  26  -4 -10   32.72    5.98
  26  -4  -9    2.63    5.79
  26  -4  -8   11.71    6.28
  27 -10   3   13.76    8.03
  27  -9   2   29.44    7.98
  27  -8   1   -1.15    9.06
  27  -7  -1    8.92    7.07
  27  -6  -3   -1.13    8.89
  27  -5  -8    0.25    7.07
  27  -5  -7    4.94    8.25
  28  -8  -1    9.35    7.67
  28  -7  -3   16.65    8.97
 -21 -20  -1   -4.32    6.68
 -21 -19  -2   24.98    7.22
 -21 -18  -3   13.40    7.93
 -21 -17  -5   -9.48    9.63
 -21 -17  -4   28.98    6.71
 -21 -16 -10   46.25    9.32
 -21 -16  -9   -0.37    7.95
 -21 -16  -8   18.10    7.45
 -21 -16  -7   -0.70    7.09
 -21 -16  -6   47.08    7.16
 -20 -21   2   28.66    5.06
 -20 -20   1   -6.92    5.84
 -20 -19   1    9.73    4.80
 -20 -18   0   67.79    5.76
 -20 -17  -1    7.41    5.50
 -20 -16  -2   41.15    5.88
 -20 -15  -4   24.27    8.03
 -20 -14 -12   32.11    8.27
 -20 -14 -11    6.70    8.02
 -20 -14 -10   -6.85    7.83
 -20 -14  -9    1.30    8.95
 -20 -14  -8   11.45    8.91
 -20 -14  -7  -14.18    6.78
 -20 -14  -6  103.01    7.80
 -19 -20   3   -8.11    5.55
 -19 -18   2    7.69    4.38
 -19 -17   1    8.49    5.66
 -19 -16   0    8.36    6.21
 -19 -15  -1   39.62    7.38
 -19 -14  -2   26.26    5.76
 -19 -13 -14   17.07    8.21
 -19 -13 -13    1.41    9.73
 -19 -13  -4   65.29    6.32
 -19 -12 -11   18.70    7.72
 -19 -12 -10    5.55    7.63
 -19 -12  -9    5.89    7.21
 -19 -12  -8   12.08    6.96
 -19 -12  -7    2.72    6.59
 -18 -21   5   -5.73    4.31
 -18 -19   4   -0.63    4.56
 -18 -17   3    4.73    3.77
 -18 -16   2   96.26    5.91
 -18 -14   0  107.52    6.91
 -18 -13 -16   13.04    9.67
 -18 -13  -1    1.74    5.02
 -18 -12 -15    5.33    7.81
 -18 -12 -14  -18.50    9.28
 -18 -12  -3  -17.70    7.16
 -18 -11 -13   -7.50    7.31
 -18 -11 -12   89.17    8.30
 -18 -11 -11   -0.97    9.48
 -18 -11  -6    0.33    8.54
 -18 -11  -5   63.67    6.64
 -17 -20   6    7.80    3.46
 -17 -18   5   -0.42    4.15
 -17 -15   3    2.75    4.85
 -17 -14   2   22.86    5.59
 -17 -13   1    3.40    5.03
 -17 -12 -17   -4.77    8.88
 -17 -12   0   65.51    4.72
 -17 -11 -16    3.26    7.34
 -17 -11 -15   -7.16    8.66
 -17 -11  -2  225.88    8.17
 -17 -10 -14   -3.95    7.15
 -17 -10 -13    5.71    8.57
 -17 -10  -4   11.58    5.49
 -17  -9 -10   -2.30    6.99
 -17  -9  -9   64.59    7.03
 -17  -9  -8   95.42    7.16
 -16 -20   7    3.44    3.95
 -16 -16   5    1.17    4.43
 -16 -11 -18   13.16    7.06
 -16 -10 -16   -2.41    8.34
 -16 -10  -1    7.61    4.80
 -16  -9 -14    3.53    7.21
 -16  -9  -3   -3.94    5.08
 -16  -8 -11    6.45    6.53
 -16  -8 -10   29.31    6.47
 -16  -8  -9   -0.50    6.20
 -16  -8  -8   53.47    5.95
 -16  -8  -7   13.91    5.61
 -16  -8  -6  387.72    7.97
 -15 -20   8   28.03    3.41
 -15 -14   5   18.77    3.18
 -15 -13   4   72.12    4.66
 -15 -12   3   85.25    4.52
 -15 -11 -19    3.18    8.48
 -15 -11   2  301.07    6.29
 -15 -10 -18   -6.28    8.56
 -15 -10   1    1.82    3.81
 -15  -9 -17   15.25    7.00
 -15  -9 -16   25.89    8.89
 -15  -9  -1   28.39    5.91
 -15  -8 -15    4.03    7.03
 -15  -8 -14   62.01    9.25
 -15  -8  -3   26.75    6.67
 -15  -7 -12   64.31    6.88
 -15  -7 -11   31.46    6.78
 -15  -7 -10    3.60    7.69
 -15  -7  -9   10.77    7.79
 -15  -7  -8  147.12    8.56
 -15  -7  -7   25.45    5.52
 -15  -7  -6  248.99    7.06
 -14 -20   9    0.53    2.55
 -14 -14   6  122.41    3.92
 -14 -10 -20   20.86    7.52
 -14  -9 -18   12.21    8.47
 -14  -9   1   -0.75    4.64
 -14  -8 -17    7.22    6.64
 -14  -7 -15   28.08    6.40
 -14  -7 -14   44.24    8.12
 -14  -7  -3   84.35    6.85
 -14  -6 -12  -14.85    5.92
 -14  -6 -11  173.45    6.61
 -14  -6 -10   85.57    7.29
 -14  -6  -9   57.99    7.60
 -14  -6  -8   39.64    7.40
 -14  -6  -7   26.79    6.80
 -14  -6  -6   86.17    5.44
 -13 -18   9    6.88    2.67
 -13 -14   7   14.92    2.87
 -13  -9 -20    5.75    6.97
 -13  -8 -18   -7.76    7.95
 -13  -8   1   74.79    5.14
 -13  -7 -17   16.78    6.68
 -13  -6 -15   17.51    6.44
 -13  -6 -14   66.43    8.06
 -13  -6  -3   28.75    6.13
 -13  -5 -11  105.64    5.87
 -13  -5 -10   43.40    5.35
 -13  -5  -9   42.30    5.29
 -13  -5  -8   32.65    5.24
 -13  -5  -7   20.56    5.12
 -13  -5  -6   50.93    4.97
 -12 -16   9   31.70    2.25
 -12  -9 -21   14.69    6.46
 -12  -8 -20   39.79    6.87
 -12  -7 -18    3.76    7.83
 -12  -7   1   75.16    4.44
 -12  -6 -17    9.38    5.95
 -12  -5 -14  107.76    7.97
 -12  -5  -3   81.50    4.51
 -12  -4 -10   79.44    5.53
 -12  -4  -9    4.10    4.83
 -12  -4  -8    6.66    4.92
 -11 -13   8  126.74    2.80
 -11  -8 -21   14.06    6.31
 -11  -7 -20   28.48    6.40
 -11  -6 -18    8.14    7.60
 -11  -6   1   19.22    3.06
 -11  -5 -16   87.41    7.94
 -11  -5  -1   14.81    3.47
 -11  -4 -14   15.12    5.98
 -11  -4 -13   15.80    7.15
 -11  -4  -4 1022.62    9.00
 -10  -7 -21    5.88    6.10
 -10  -5 -18   54.20    6.14
 -10  -4 -16  154.40    6.75
 -10  -3 -13   73.88    5.36
 -10  -3 -12   16.13    6.46
 -10  -3  -5  532.89    6.48
  -9  -4 -17    9.38    7.54
  -9  -4   0   20.15    2.58
  -9  -3 -15   34.70    5.34
  -9  -2 -11  203.61    5.77
  -9  -2 -10  180.49    5.37
  -9  -2  -9  233.71    5.54
  -9  -2  -8  158.91    5.11
  -9  -2  -7   29.74    4.36
  -8  -3 -16   15.37    6.40
  -8  -3  -1   35.70    3.69
  -8  -2 -14   11.97    5.04
  -8  -2  -4   96.06    4.60
  -7  -8   7    1.80    1.07
  -7  -6 -22   10.14    7.19
  -7  -3 -18   35.79    5.53
  -7  -2  -2   29.96    2.75
  -7  -1 -11   18.96    4.14
  -7  -1 -10    6.41    5.35
  -7  -1  -7   41.31    5.02
  -7  -1  -6    4.65    3.21
  -6  -6 -23  -16.56    5.84
  -6  -3 -19    0.04    5.31
  -5  -4 -21    4.39    7.56
  -5  -2 -18    6.66    4.46
  -5  -1 -15   27.90    6.22
  -5  -1  -2 1129.13    5.26
  -5   0 -11   -3.75    3.53
  -5   0 -10  161.80    5.25
  -5   0  -7    5.20    3.85
  -5   0  -6 1158.52    6.47
  -4 -11  11    9.18    1.50
  -4  -6 -24   13.33    7.91
  -4  -4 -22    9.34    5.14
  -4   0 -13   -4.12    5.09
  -4   0  -4  580.70    4.22
  -3 -14  13  102.31    2.72
  -3  -9  10   54.18    1.66
  -3  -3 -21   -1.70    5.90
  -3   0 -15   -4.19    3.73
  -2  -5 -24   27.84    6.19
  -2  -4 -23   -1.27    4.41
  -2  -2 -20   59.70    6.10
  -2  -1 -18   10.06    5.71
  -2   0 -16    8.21    3.75
  -1 -11  12   55.46    2.77
  -1  -3 -22    4.14    5.30
  -1   1 -13    4.01    4.24
  -1   1  -4  586.27    3.39
   0 -20  16    6.27    3.78
   0 -17  15    4.14    3.60
   0  -9  11   -0.24    2.82
   0   0 -17    3.41    4.37
   1  -4 -24   51.23    5.44
   1   1 -15    0.13    3.66
   2 -19  16   25.46    4.47
   2 -16  15    8.02    3.39
   2  -6   9   19.72    2.53
   2  -4   7   -1.29    1.94
   2  -3 -23   -4.86    5.41
   2  -1 -20   26.25    4.49
   2   0   1   -0.67    1.26
   2   2  -6  121.89    1.40
   3 -13  14   29.82    4.76
   3  -7  10   25.91    2.96
   3  -3   6 1103.63    5.50
   3   1  -1   50.63    1.48
   4 -18  16    7.60    4.89
   4 -15  15   16.78    4.94
   4 -13  14   89.08    4.53
   4 -11  13    5.28    4.33
   4  -8  11  111.61    3.95
   4  -2   5   11.31    3.38
   4   2 -13   60.49    2.11
   5 -18  16   -5.80    4.22
   5 -15  15   41.98    5.39
   5 -11  13    0.34    3.61
   5  -8  11  194.01    4.66
   5  -2   5  125.18    3.12
   6 -15  15   90.72    5.09
   6   0 -19    0.71    2.87
   6   0   2 1287.78    6.50
   6   1 -17    5.29    2.11
   7 -15  15   -1.29    4.55
   7  -9  12   86.89    5.82
   7  -1 -21    0.24    2.51
   7   0   2   32.80    3.81
   7   1 -17   28.73    2.09
   8 -15  15    6.32    4.97
   8  -9  12   80.94    6.05
   8   0   2 1127.93    6.95
   9 -18  16   12.30    5.32
   9 -15  15   -1.81    5.29
   9 -11  13   78.50    5.05
   9  -8  11    8.13    4.56
   9  -2   5  301.87    5.23
   9   0 -19    1.95    1.69
  10 -18  16   -0.06    5.65
  10 -15  15   19.71    6.69
  10 -13  14   36.10    5.47
  10 -11  13   43.19    4.83
  10  -8  11   69.45    5.26
  10  -2   5  332.80    5.46
  10   2  -4  735.62    4.71
  11 -18  16   14.10    7.49
  11 -15  15   22.59    7.42
  11 -13  14   62.33    6.93
  11 -11  13  -15.10    6.36
  11  -8  11   37.03    6.92
  11  -7  10  137.15    5.63
  11  -3   6  416.69    6.23
  11  -2 -22    4.49    1.63
  11   1  -1  639.66    5.43
  12 -19  16   18.57    6.29
  12 -16  15   20.42    6.17
  12 -10  12    2.14    5.25
  12  -6   9   81.80    4.90
  12  -5   8  110.36    4.95
  12  -4   7   52.64    4.53
  12  -3   6  161.40    6.64
  12  -1   3  147.45    4.70
  12   0   1    4.34    3.50
  12   2  -5  202.81    3.88
  13 -16  15    6.65    7.23
  13 -14  14    4.78    5.59
  13 -12  13    9.98    5.31
  13 -10  12   45.60    6.90
  13  -6   9  165.72    7.24
  13  -5   8   34.67    5.93
  13  -4   7   22.24    5.95
  13   1  -2  416.82    5.28
  13   2 -11   10.59    1.94
  13   2  -7  578.23    4.97
  14 -17  15   -1.87    6.43
  14 -14  14   20.65    7.10
  14 -12  13    3.56    6.82
  14  -9  11   36.32    5.64
  14  -2   4   80.79    6.02
  14  -1   2   42.07    4.31
  14   0   0  263.59    5.09
  14   1 -15   29.94    1.38
  15 -17  15    2.33    7.46
  15 -15  14    6.47    6.10
  15 -11  12   14.16    5.50
  15  -8  10   13.74    5.56
  15  -4   6   66.59    4.94
  15  -3   5  153.98    6.75
  15   1 -14    2.80    1.61
  16 -15  14    0.02    7.26
  16 -13  13   10.38    7.43
  16 -10  11    4.17    5.69
  16  -7   9   -2.47    6.76
  16  -6   8   30.46    6.88
  16  -5   7  160.29    6.94
  16  -2   3   54.25    4.81
  16  -1   1   25.64    4.35
  16   0  -1   -8.25    5.52
  16   1  -5   19.10    3.35
  17 -16  14   37.02    7.96
  17 -14  13    8.75    6.16
  17 -12  12   86.23    6.96
  17 -10  11  -20.19    7.26
  17  -9  10   14.71    5.76
  17  -3   4   49.27    4.88
  17   0  -2   62.35    5.75
  17   1 -10   48.14    3.75
  17   1  -9   -0.21    3.62
  17   1  -8  209.12    4.70
  17   1  -7   23.95    4.33
  18 -11  11   14.44    6.18
  18  -8   9   39.42    7.52
  18  -7   8   79.46    6.11
  18  -6   7   10.12    5.62
  18  -5   6  138.92    6.34
  18  -1 -17   10.94    1.69
  18   0 -14   91.95    2.90
  18   0  -3   -0.10    5.28
  19 -15  13   12.52    7.99
  19 -13  12   28.76    7.92
  19 -10  10   33.97    6.56
  19  -4   4   -1.26    4.71
  19  -2   1   59.53    7.18
  19  -1 -16   26.65    2.40
  19   0 -12   -0.26    3.04
  19   0  -6  191.00    4.91
  19   0  -5   -6.48    5.46
  20 -14  12   10.89    8.02
  20 -12  11    7.37    7.95
  20 -11  10   -2.15    6.55
  20  -8   8   17.04    7.63
  20  -7   7   47.73    6.09
  20  -6   6    8.42    7.11
  20  -5   5  -20.54    6.86
  20  -3   2   81.79    7.36
  20  -2   0   63.77    6.90
  20  -1  -3    4.95    4.52
  21 -13  11   10.78    8.13
  21 -10   9   -0.50    6.24
  21  -9   8   -1.87    6.26
  21  -6   5   13.30    5.98
  21  -5   4   20.28    5.88
  21  -3   1   10.34    7.29
  21  -2 -16   -3.96    2.68
  21  -2  -1    8.19    6.40
  21  -1 -13   -4.47    3.12
  21  -1  -5   -2.24    4.48
  22 -14  11    3.66    8.28
  22 -12  10    2.76    8.35
  22 -11   9   23.87    6.59
  22  -5   3   11.86    6.19
  22  -3   0   90.78    7.56
  22  -2  -3  -11.47    4.61
  23 -13  10   -0.24    8.49
  23 -12   9   -0.28    6.82
  23  -9   7    7.16    8.88
  23  -8   6   19.43    8.25
  23  -7   5   19.12    8.76
  23  -5   2   15.89    6.10
  23  -4   0   44.07    6.53
  23  -3  -2   50.16    5.79
  23  -2 -12   10.48    3.99
  23  -2  -6   70.26    5.51
  23  -2  -5    6.04    6.63
  24 -11   8   18.40    8.87
  24 -10   7   -7.59    8.47
  24  -9   6   10.90    6.75
  24  -8   5   11.24    7.05
  24  -7   4   83.33    8.88
  24  -5   1    1.04    6.16
  24  -4  -1   -1.00    5.75
  24  -3 -14    1.44    3.42
  24  -3  -4   28.35    5.73
  25 -11   7    1.72    7.18
  25 -10   6   10.04    7.04
  25  -9   5   24.65    7.24
  25  -8   4   -6.71    6.81
  25  -7   3   16.39    8.58
  25  -6   1   15.22    6.62
  25  -5   0   10.35    8.13
  25  -4  -3    3.90    6.15
  25  -3 -10    5.49    4.98
  25  -3  -9   11.24    5.40
  25  -3  -8   11.96    5.70
  25  -3  -7  -14.54    6.25
  26 -11   6    8.08    7.51
  26 -10   5   -3.79    7.84
  26  -9   4   -4.95    7.57
  26  -8   3   14.99    7.61
  26  -7   2   22.33    8.51
  26  -6   0   -4.45    6.94
  26  -5  -2   21.87    7.89
  26  -4  -7   11.83    5.86
  26  -4  -6   19.44    7.39
  26  -4  -5   10.54    7.75
  27 -10   4   -5.55    7.74
  27  -9   3   -9.06    7.75
  27  -8   2   17.09    9.18
  27  -7   0    9.10    7.16
  27  -6  -2   14.34    7.15
  27  -5  -6   -1.82    6.04
  27  -5  -5    2.05    6.46
  28  -8   0   -2.00    6.99
  28  -7  -2   -8.39    7.48
  28  -6  -5   -1.23    7.11
  28  -6  -4   14.89    8.47
 -21 -20  -2   41.10    6.23
 -21 -19  -3   -5.18    6.44
 -21 -18  -6   32.99    8.97
 -21 -18  -5    1.74    8.57
 -21 -18  -4    9.40    6.59
 -21 -17  -9   12.29    7.79
 -21 -17  -8   -9.56    7.39
 -21 -17  -7   -1.12    6.76
 -21 -17  -6    9.29    6.94
 -20 -21   1   -4.08    5.75
 -20 -19   0   21.34    5.50
 -20 -18  -1   11.26    7.08
 -20 -17  -2    7.35    5.66
 -20 -16  -4   38.44    8.79
 -20 -16  -3    9.30    6.16
 -20 -15 -12    1.89    7.99
 -20 -15 -11   -1.51    8.28
 -20 -15 -10    2.44   10.14
 -20 -15  -9   23.42   10.21
 -20 -15  -8   13.53   10.23
 -20 -15  -7   33.13    9.03
 -20 -15  -6   48.56    7.28
 -20 -15  -5   11.18    6.18
 -19 -21   3   -4.81    5.66
 -19 -19   2   17.23    5.40
 -19 -18   1   -5.62    5.54
 -19 -15  -2   26.51    7.84
 -19 -14 -14    6.30    7.75
 -19 -14 -13  -10.70    9.31
 -19 -14  -4   76.76    7.98
 -19 -14  -3    4.14    5.63
 -19 -13 -12   25.54    7.46
 -19 -13 -11    6.49    8.06
 -19 -13 -10    6.94    7.72
 -19 -13  -9   37.91    9.44
 -19 -13  -8   34.07    9.25
 -19 -13  -7   23.16    8.97
 -19 -13  -6   28.77    7.07
 -19 -13  -5   12.61    6.28
 -18 -22   5   12.92    4.50
 -18 -20   4   10.10    4.86
 -18 -18   3   -8.06    5.23
 -18 -15   1   29.35    4.65
 -18 -13 -15   -6.81    8.05
 -18 -13  -2   19.52    6.60
 -18 -12 -13   21.77    7.48
 -18 -12 -12   52.58    9.65
 -18 -12  -4   23.07    6.07
 -18 -11 -10   75.98    7.68
 -18 -11  -9   17.10    6.83
 -18 -11  -8   15.14    6.96
 -18 -11  -7   -6.68    6.55
 -17 -21   6    2.87    4.21
 -17 -19   5   17.15    4.24
 -17 -17   4  210.47    5.75
 -17 -12 -16   -3.34    7.34
 -17 -12  -1   -2.88    5.91
 -17 -11 -14   15.04    7.10
 -17 -11  -3    4.86    7.31
 -17 -10 -12   63.24    7.70
 -17 -10 -11   -8.95    6.85
 -17 -10 -10  106.36    9.47
 -17 -10  -9   -3.06    8.38
 -17 -10  -8   40.44    8.60
 -17 -10  -7    2.93    8.73
 -17 -10  -6   -6.23    6.38
 -17 -10  -5   -0.85    5.68
 -16 -21   7   -0.42    3.64
 -16 -18   6   45.79    3.52
 -16 -15   4   18.00    4.24
 -16 -14   3    3.07    4.62
 -16 -12 -18   14.66    7.83
 -16 -12   1    8.04    5.47
 -16 -11 -17   -7.73    7.39
 -16 -11   0   60.71    4.63
 -16 -10 -15   20.41    7.16
 -16 -10  -2   46.49    5.32
 -16  -9 -13   11.91    6.66
 -16  -9 -12    7.35    6.81
 -16  -9  -5  -13.57    7.67
 -16  -9  -4   79.29    5.90
 -15 -18   7   17.43    3.55
 -15 -16   6   35.49    3.57
 -15 -11 -18   17.09    8.71
 -15 -10 -17   17.56    6.89
 -15 -10   0   58.10    5.67
 -15  -9 -15   -2.50    8.97
 -15  -8 -13    9.54    6.46
 -15  -8 -12    4.89    8.13
 -15  -8  -4  122.52    5.72
 -14 -18   8   -2.80    2.74
 -14 -16   7    7.13    3.35
 -14 -13   5    5.00    3.37
 -14 -12   4   84.82    4.10
 -14 -11   3  188.97    4.79
 -14 -10 -19   -2.32    6.79
 -14 -10   2  216.65    4.53
 -14  -9 -17   -4.63    8.24
 -14  -8 -16   25.39    6.75
 -14  -8  -1  235.16    5.69
 -14  -7 -13   50.46    6.37
 -14  -7  -4   -3.55    6.45
 -13 -21  10   -3.23    2.37
 -13 -16   8  133.58    3.41
 -13 -13   6  259.64    4.39
 -13 -10 -20   -2.69    8.20
 -13  -9 -19   25.71    6.54
 -13  -9   2  634.33    6.65
 -13  -7 -16   19.16    6.15
 -13  -7  -1  169.63    5.02
 -13  -6 -13   51.34    6.33
 -13  -6  -4   50.17    6.43
 -12 -22  11    6.65    1.94
 -12 -13   7   -2.37    2.51
 -12 -10 -21   -5.21    7.72
 -12  -9 -20   -3.91    7.84
 -12  -8 -19   17.10    6.44
 -12  -6 -16    8.74    6.18
 -12  -6  -1   22.89    3.78
 -12  -5 -13   16.95    5.30
 -12  -5 -12  160.16    7.64
 -12  -5  -4   91.40    4.88
 -11  -8 -20   23.08    7.72
 -11  -7 -19    9.21    6.09
 -11  -7   2  737.97    6.07
 -11  -6 -17    4.39    8.37
 -11  -5 -15   10.89    7.27
 -11  -4 -12   33.99    5.11
 -11  -4 -11   19.21    6.43
 -11  -4  -5   67.28    4.68
 -10  -7 -20   14.57    7.45
 -10  -6 -19   26.37    6.04
 -10  -6   2  415.07    4.17
 -10  -5 -17    1.98    5.75
 -10  -5   0   59.63    3.94
 -10  -4 -15   -3.87    5.75
 -10  -4  -2  159.44    4.31
 -10  -3 -11   95.79    5.22
 -10  -3 -10    8.91    4.56
 -10  -3  -9  186.86    6.78
 -10  -3  -8   98.95    6.40
 -10  -3  -7   78.05    4.70
 -10  -3  -6  165.71    5.17
  -9 -16  11    9.49    1.16
  -9 -14  10  134.02    1.65
  -9  -8 -22   17.96    8.19
  -9  -6 -20   -0.37    6.01
  -9  -6   3   20.96    2.49
  -9  -5 -18   52.99    7.42
  -9  -4 -16   38.14    7.09
  -9  -3 -14   44.84    5.39
  -9  -3  -3  338.66    4.71
  -8 -10   8  107.72    1.54
  -8  -8 -23   -6.19    7.42
  -8  -6 -21   17.32    6.27
  -8  -6   4  186.25    2.54
  -8  -4 -18   56.16    5.87
  -8  -4   1  654.80    4.42
  -8  -2 -12   83.14    4.78
  -8  -2  -5   26.45    5.00
  -7  -7 -23    1.48    6.30
  -7  -7   6  135.94    1.59
  -7  -4 -19   20.75    5.27
  -7  -4   2  167.29    2.68
  -7  -2 -14   78.54    6.71
  -7  -1  -9   94.54    4.42
  -7  -1  -8   22.72    3.82
  -6  -4 -20   54.88    5.95
  -6  -4   3   74.90    1.38
  -6  -3 -18    3.29    6.19
  -6  -2  -1  170.49    3.73
  -6  -1 -13  137.06    5.21
  -6  -1 -12   80.51    5.64
  -6  -1  -4  467.97    4.51
  -5 -22  15   -2.45    2.03
  -5  -6 -23    4.27    7.00
  -5  -5 -22   65.97    6.19
  -5  -3 -19   20.94    4.96
  -5  -2 -17    9.60    5.71
  -5   0  -9   -1.70    2.81
  -5   0  -8  983.39    6.62
  -4 -17  14   33.26    2.19
  -4  -3   3  313.91    1.63
  -4  -2 -18   28.28    5.60
  -4  -1  -1  658.38    3.61
  -4   0 -12  232.07    5.69
  -3 -19  15   41.96    2.94
  -3 -16  14    5.82    2.42
  -3  -4 -22   22.75    5.18
  -3  -2 -19    1.04    4.65
  -3  -1   0  370.17    2.19
  -3   0  -3   14.88    2.86
  -2 -22  16    7.84    2.91
  -2 -18  15   47.78    3.25
  -2 -13  13   66.55    3.14
  -2   0 -15   -0.35    5.00
  -2   1 -11   14.84    3.05
  -2   1  -7   36.94    3.09
  -2   1  -6  216.97    2.91
  -1  -4 -23   19.87    4.51
  -1   0 -16    0.71    4.37
   0 -14  14   30.47    3.91
   0 -12  13    7.57    3.32
   0  -3 -22    6.95    5.24
   0  -1 -19    3.65    3.93
   0   1 -14 1014.89    6.89
   1 -19  16   35.78    4.30
   1 -16  15   14.50    3.16
   1 -10  12   67.33    2.91
   1  -6   9   16.36    2.82
   1  -5   8 1106.27    5.57
   1  -2 -21    2.92    4.79
   2 -18  16   25.87    4.33
   2  -4 -24    5.99    4.01
   2  -3   6  318.53    3.69
   2   0 -18  108.34    3.87
   3 -18  16    5.62    3.66
   3 -15  15   57.06    4.92
   3 -11  13   34.98    3.41
   3  -8  11  157.34    3.90
   3  -4 -24   30.62    4.78
   3  -3 -23   -2.47    4.28
   4  -9  12   24.90    4.35
   4   2  -4  273.33    1.18
   5 -17  16   61.03    5.57
   5  -9  12  218.07    4.85
   5  -2 -22    7.26    4.01
   5   0   2 3796.27    9.00
   5   2 -13  104.30    2.15
   6 -20  17   18.63    5.48
   6 -17  16   20.65    4.70
   6 -14  15    5.10    5.49
   6 -12  14   -2.77    4.96
   6  -9  12    7.15    4.00
   6  -1   4  497.89    5.24
   6   1   0  519.89    4.31
   7 -20  17  -14.08    6.00
   7 -17  16  108.60    5.61
   7 -14  15   19.60    5.85
   7 -12  14   68.77    6.17
   7  -5   9  116.30    5.19
   7  -1   4  504.10    4.84
   7   0 -19    3.29    2.10
   7   1   0  330.43    3.52
   7   2  -3   68.98    2.23
   8 -17  16   12.28    4.99
   8 -14  15   -3.73    6.08
   8 -12  14    6.72    5.26
   8  -5   9  203.69    6.01
   8  -4   8   90.84    5.24
   8  -1   4   -2.26    2.89
   8   0 -19   -4.98    1.87
   8   1   0    2.19    2.40
   8   2  -3  289.94    3.31
   9 -17  16   24.10    5.64
   9 -14  15  -15.75    6.53
   9 -12  14   30.13    6.24
   9  -9  12   10.78    4.59
   9  -1   4   93.17    5.30
   9   0   2  725.45    5.65
   9   1   0  887.23    5.63
   9   2  -3  294.19    3.72
  10 -17  16    9.61    7.07
  10 -12  14   58.72    6.88
  10  -9  12  134.22    5.61
  10  -2 -22   -2.34    2.10
  10   0   2  308.26    4.90
  11 -17  16   -1.57    7.17
  11  -9  12   22.32    6.18
  11  -2   5  198.95    4.96
  11   0   2  118.32    5.32
  11   2  -4  687.89    4.92
  12 -18  16   12.28    5.86
  12 -15  15    5.31    5.50
  12 -13  14   53.83    5.53
  12 -11  13   27.66    5.37
  12  -8  11  140.04    5.83
  12  -2   5  183.90    5.13
  12   1  -1   90.43    3.67
  13 -18  16   25.19    7.42
  13 -15  15   -0.68    7.35
  13 -13  14   57.13    6.17
  13 -11  13   29.56    7.51
  13  -8  11   57.38    7.19
  13  -7  10   45.31    5.14
  13  -3   6   15.14    4.40
  13  -1   3  122.57    4.81
  13   0   1    3.79    3.70
  13   2  -6  180.88    3.32
  14 -16  15    8.54    6.44
  14 -10  12    2.83    5.25
  14  -7  10  127.26    7.49
  14  -6   9   50.29    4.96
  14  -5   8   48.18    4.81
  14  -4   7   85.10    5.09
  14  -2 -21    5.30    1.01
  14   1  -2   22.81    3.71
  14   2  -9   36.90    2.68
  14   2  -8   76.24    3.35
  14   2  -7   95.23    3.51
  15 -16  15  -14.72    7.69
  15 -14  14    2.12    5.85
  15 -12  13   27.35    5.83
  15 -10  12   49.47    7.35
  15  -9  11    6.18    5.43
  15  -2   4   10.13    4.37
  15  -1   2  170.23    5.22
  15   0   0   15.01    3.95
  15   1  -3  138.11    4.42
  16 -17  15   -7.33    6.67
  16 -11  12  134.04    6.91
  16  -9  11   12.78    8.06
  16  -8  10   17.03    5.43
  16  -4   6   54.14    4.98
  16  -3   5   37.64    4.68
  16   1 -13    8.78    2.01
  16   1  -4   64.89    3.96
  17 -15  14    1.04    7.49
  17 -13  13   -1.22    5.98
  17 -11  12   10.24    8.31
  17  -7   9    1.36    6.62
  17  -6   8  136.50    6.30
  17  -5   7   41.87    4.96
  17  -4   6  300.24    8.08
  17  -2   3   79.32    6.53
  17  -1 -18   23.77    1.32
  17  -1   1   18.97    4.93
  17   1 -11    4.10    2.90
  17   1  -6  141.84    4.22
  17   1  -5   27.94    4.76
  18 -16  14    0.99    5.88
  18 -14  13   23.76    6.30
  18 -12  12   16.56    6.29
  18 -10  11   12.26    8.13
  18  -9  10    8.73    5.78
  18  -4   5   37.89    5.12
  18  -3   4   15.50    6.42
  18  -2   2   37.78    5.33
  18  -1   0   22.56    4.95
  19 -14  13   15.57    7.98
  19 -11  11    3.61    6.22
  19  -8   9   14.13    7.61
  19  -7   8   54.22    6.06
  19  -6   7   86.96    6.47
  19  -5   6    6.72    6.93
  19  -3   3   13.05    5.65
  19  -1  -1   31.77    5.04
  19   0 -13   -5.29    2.88
  19   0  -4  175.06    5.27
  20 -13  12    1.47    8.89
  20 -10  10   33.12    6.56
  20  -9   9   13.47    6.54
  20  -4   4   23.79    5.77
  20  -1 -15   -5.58    2.61
  20  -1  -2   39.62    5.08
  20   0 -11   -3.53    3.46
  20   0 -10   12.84    3.97
  20   0  -9    2.92    3.37
  20   0  -8   33.11    3.98
  20   0  -7    5.74    4.96
  20   0  -6   60.32    5.59
  21 -14  12    3.06    8.71
  21 -12  11    7.54    8.18
  21 -11  10    5.59    6.90
  21  -8   8   28.57    8.60
  21  -7   7   31.49    7.65
  21  -6   6   44.17    8.74
  21  -4   3    8.95    5.76
  21  -1  -4   33.91    4.64
  21  -1  -3    3.35    5.77
  22 -13  11   17.02    8.31
  22 -10   9   11.65    8.03
  22  -9   8   18.54    6.58
  22  -8   7   15.87    6.38
  22  -7   6  102.91    7.43
  22  -6   5   19.29    6.01
  22  -5   4   20.33    8.44
  22  -4   2   31.09    6.01
  22  -2 -15    4.05    3.08
  22  -2  -2   42.92    5.12
  22  -1 -11    2.11    4.09
  22  -1 -10   21.88    4.52
  22  -1  -9    1.77    3.77
  22  -1  -8   25.34    4.29
  22  -1  -7    3.15    4.37
  22  -1  -6   76.88    6.83
  23 -11   9    7.79    6.85
  23 -10   8   30.26    6.91
  23  -6   4   83.73    6.76
  23  -5   3   -5.21    7.53
  23  -4   1    1.05    5.90
  23  -3  -1   35.34    5.89
  23  -2 -13   -1.26    3.69
  23  -2  -4   25.01    4.91
  24 -12   9   -2.89    6.92
  24  -8   6   33.23    8.59
  24  -6   3    5.47    6.37
  24  -5   2   79.96    8.50
  24  -4   0   14.71    6.11
  24  -3  -3   -7.05    5.33
  24  -3  -2   20.64    7.03
  24  -2 -10   -9.09    4.77
  24  -2  -9   13.91    5.62
  24  -2  -8   13.72    5.98
  24  -2  -7   36.62    6.14
  25 -10   7   46.09    8.83
  25  -9   6    3.17    8.76
  25  -8   5   23.23    9.63
  25  -6   2   45.44    6.79
  25  -4  -2   11.12    6.07
  25  -3 -12    9.01    4.74
  25  -3 -11   -3.16    3.86
  25  -3  -6   -6.28    5.39
  25  -3  -5    5.12    6.96
  26 -10   6   10.66    8.78
  26  -9   5    3.79    8.89
  26  -8   4   21.06    9.88
  26  -6   1   45.26    8.78
  26  -5  -1   13.60    6.58
  26  -4  -4   16.75    6.31
  27  -9   4   31.60    9.89
  27  -8   3    9.59    9.22
  27  -7   1   -5.13    6.93
  27  -6  -1    9.67    6.84
  27  -5  -4    5.49    6.69
  27  -5  -3  -12.30    8.21
  28  -8   1   27.20    7.87
  28  -7  -1    7.52    7.20
  28  -7   0   -0.26    8.56
  28  -6  -3    2.99    7.10
 -21 -20  -3    5.50    6.72
 -21 -19  -6   15.83    8.74
 -21 -19  -5   -2.31    7.01
 -21 -19  -4    0.54    6.70
 -21 -18  -8   20.12    7.56
 -21 -18  -7    4.98    6.89
 -20 -20   0    7.05    5.36
 -20 -19  -1   -1.01    5.73
 -20 -18  -2   49.58    6.52
 -20 -17  -4    5.09    8.04
 -20 -17  -3  -10.95    5.98
 -20 -16 -12    7.53    8.69
 -20 -16 -11    0.27    8.36
 -20 -16 -10   -1.64    9.65
 -20 -16  -9    0.11    9.03
 -20 -16  -8   -6.81    8.56
 -20 -16  -7    1.69    8.40
 -20 -16  -6   34.80    7.23
 -20 -16  -5    2.66    6.71
 -19 -20   2    2.78    5.33
 -19 -17   0   39.55    5.28
 -19 -16  -1    1.66    5.43
 -19 -15 -14   24.83    8.65
 -19 -15 -13   42.78    9.85
 -19 -15  -3   40.32    7.51
 -19 -14 -12   16.74    8.05
 -19 -14 -11   26.36    7.82
 -19 -14 -10  -18.22    9.36
 -19 -14  -9    6.08    9.16
 -19 -14  -8   28.00    9.10
 -19 -14  -7    7.63    8.89
 -19 -14  -6   60.13    8.65
 -19 -14  -5   36.65    6.61
 -18 -21   4    0.93    4.72
 -18 -19   3   -0.67    4.99
 -18 -17   2   39.86    4.56
 -18 -16   1   45.19    6.12
 -18 -15   0   -0.82    5.18
 -18 -14 -15   25.55    7.83
 -18 -14  -1   20.93    5.48
 -18 -13 -14   36.46    7.85
 -18 -13 -13   27.42    9.55
 -18 -13  -3   14.67    5.44
 -18 -12 -11   11.74    7.82
 -18 -12 -10    5.99    6.75
 -18 -12  -9   22.84    8.73
 -18 -12  -8    1.80    8.43
 -18 -12  -7   43.77    6.84
 -18 -12  -6   -8.27    6.50
 -18 -12  -5   11.88    6.02
 -17 -22   6    2.26    4.27
 -17 -16   3    4.50    3.86
 -17 -15   2   98.78    5.79
 -17 -14   1   -0.69    4.45
 -17 -13 -16   12.31    7.69
 -17 -13   0  287.16    6.27
 -17 -12 -15    0.91    7.14
 -17 -12 -14   66.94    9.26
 -17 -12  -2   43.52    6.62
 -17 -11 -13  -14.90    7.25
 -17 -11 -12   15.26    6.98
 -17 -11  -5   31.59    7.38
 -17 -11  -4   61.81    5.87
 -16 -19   6   -1.29    3.75
 -16 -17   5   13.95    4.04
 -16 -13   2   20.19    3.59
 -16 -12 -17  -19.73    6.86
 -16 -11 -16   11.08    6.79
 -16 -11 -15  -15.55    8.98
 -16 -11  -1   -7.52    5.90
 -16 -10 -14   -0.50    6.42
 -16 -10 -13    2.93    8.20
 -16 -10  -3   39.41    5.48
 -16  -9 -11   16.40    6.65
 -16  -9 -10   49.64    7.10
 -16  -9  -9   -3.90    6.12
 -16  -9  -8   78.29    6.96
 -16  -9  -7  -10.59    5.58
 -16  -9  -6  110.56    6.27
 -15 -21   8    3.78    3.24
 -15 -15   5    5.29    3.75
 -15 -11 -17    3.07    8.61
 -15 -11   1  116.66    6.03
 -15 -10 -16    5.63    7.00
 -15  -9 -14   11.11    6.85
 -15  -9  -2  202.19    6.15
 -15  -8 -11   29.85    6.51
 -15  -8 -10   57.11    8.07
 -15  -8  -9    2.78    7.74
 -15  -8  -8  175.40    8.39
 -15  -8  -7   53.04    7.90
 -15  -8  -6  241.16    6.92
 -15  -8  -5   89.40    6.14
 -14 -21   9    7.52    2.69
 -14 -11 -19   -6.60    8.66
 -14 -10 -18   12.17    7.23
 -14  -9 -16    7.98    9.09
 -14  -9   0   31.16    4.19
 -14  -8 -15    8.80    6.31
 -14  -8 -14    4.59    9.14
 -14  -8  -2  216.52    5.79
 -14  -7 -12  124.98    7.08
 -14  -7 -11   32.53    6.26
 -14  -7 -10  154.68    8.39
 -14  -7  -6   79.07    7.55
 -14  -7  -5   63.14    5.15
 -13 -12   5    9.51    3.45
 -13 -11   4  343.18    4.97
 -13 -10 -19  -22.93    8.54
 -13 -10   3   19.46    3.74
 -13  -9 -18   30.89    6.74
 -13  -8 -17    4.50    6.52
 -13  -8   0    5.63    4.80
 -13  -7 -15   22.69    6.21
 -13  -7 -14   28.07    7.70
 -13  -7  -2  655.76    8.27
 -13  -6 -12  308.48    7.39
 -13  -6 -11   -9.38    5.78
 -13  -6 -10  272.69    8.23
 -13  -6  -6    9.47    6.94
 -13  -6  -5   -4.78    4.63
 -12 -19  10    6.18    2.26
 -12  -8 -18   19.42    8.06
 -12  -8   2  426.38    4.93
 -12  -7 -17   -7.79    5.89
 -12  -7   0  296.41    5.86
 -12  -6 -15    2.62    5.80
 -12  -6 -14   14.74    7.42
 -12  -6  -2  380.86    5.74
 -12  -5 -11   28.83    5.23
 -12  -5 -10   99.01    7.01
 -12  -5  -9   -5.54    6.43
 -12  -5  -7   45.24    6.55
 -12  -5  -6   46.31    4.84
 -12  -5  -5   13.06    4.58
 -11 -17  10   24.39    1.86
 -11 -15   9   46.19    2.25
 -11  -9 -21   12.48    6.24
 -11  -7 -18   40.33    8.03
 -11  -6 -16   43.63    7.78
 -11  -6   0   93.90    4.66
 -11  -5 -14   66.88    6.27
 -11  -5  -2  248.14    4.94
 -11  -4 -10   31.51    4.90
 -11  -4  -9   26.52    4.92
 -11  -4  -8   68.83    4.99
 -11  -4  -7   78.71    5.00
 -11  -4  -6  232.90    5.68
 -10 -12   8   16.01    1.61
 -10  -9 -22    3.71    6.61
 -10  -7   3  127.02    3.48
 -10  -6 -18   18.95    5.90
 -10  -5 -16   97.25    6.46
 -10  -4 -14  308.80    7.35
 -10  -4 -13   26.38    7.04
 -10  -4  -3  257.09    5.02
  -9 -11   8   25.42    1.54
  -9  -6 -19   31.77    7.26
  -9  -4 -15   34.23    6.90
  -9  -4  -1  501.04    5.54
  -9  -3 -13   58.84    5.25
  -9  -3 -12   97.97    6.44
  -9  -3  -4  821.61    6.79
  -8  -5 -19   50.01    5.98
  -8  -4 -17   36.98    5.63
  -8  -3 -15    9.09    4.89
  -8  -2 -10   21.39    4.25
  -8  -2  -9  147.48    6.51
  -8  -2  -7  337.37    6.65
  -8  -2  -6  103.99    4.47
  -7  -7 -22   44.80    7.65
  -7  -3   0   13.86    2.19
  -7  -2 -13   66.52    6.77
  -7  -2  -3   69.81    3.08
  -6  -6 -22   44.52    6.51
  -6  -4 -19   19.78    7.14
  -6  -2 -15   10.91    6.12
  -6  -1 -11    4.07    4.93
  -6  -1  -5   -3.53    2.85
  -5 -18  14   19.03    1.72
  -5  -1 -14  305.65    6.03
  -4  -6 -23   -3.76    6.96
  -4  -4 -21   -1.83    5.19
  -4  -3 -19    8.86    6.28
  -4  -1 -15   11.76    5.25
  -4   0 -11   -0.59    3.54
  -4   0  -5    3.00    2.42
  -3  -3 -20   21.22    6.28
  -3  -2   2 1347.66    2.71
  -3  -1 -16  100.83    6.10
  -2 -15  14   38.55    3.01
  -2  -6   8   41.00    1.77
  -2  -4 -22   -2.14    5.63
  -2  -2 -19  -10.36    5.51
  -2  -1 -17   10.36    4.76
  -2   1  -8   57.39    2.49
  -1 -20  16   15.84    3.27
  -1  -1 -18   37.74    4.42
  -1   1 -12  123.50    3.50
   0 -19  16   19.18    3.71
   0 -16  15   -2.89    3.76
   0 -10  12  172.04    3.62
   0  -5 -24   35.26    5.71
   0  -4 -23    2.18    4.30
   0  -2 -20   87.12    5.75
   0   1 -13    0.02    3.78
   1 -13  14   14.93    3.84
   1  -7  10   13.84    3.15
   1  -3 -22    1.45    4.85
   1  -1 -19    6.28    4.54
   1   0 -17    8.36    3.21
   2 -15  15   93.77    4.76
   2 -11  13   22.82    3.14
   2  -8  11   18.93    2.81
   2  -2 -21   -1.81    4.32
   2   1 -15    3.81    2.35
   3 -21  17    1.46    4.62
   3 -17  16   16.43    4.76
   3  -9  12   65.93    4.67
   3  -2   5  148.38    2.75
   3   0 -18   53.68    3.51
   3   2  -5  147.99    0.71
   4 -20  17    8.12    4.91
   4 -17  16   14.27    4.13
   4 -14  15    9.55    4.88
   4 -12  14  104.90    5.57
   4  -4 -24   20.47    4.98
   4  -3 -23   -3.79    3.48
   4  -1 -20   15.99    4.11
   4   0   2  576.18    4.42
   4   2 -12  253.64    2.83
   5 -20  17    7.72    5.22
   5 -14  15   18.43    4.33
   5 -12  14  104.23    4.56
   5 -10  13   12.74    4.74
   5  -6  10  897.06    7.61
   5  -5   9   -1.56    3.02
   5  -4   8 1222.13    7.80
   5  -3 -23    8.40    3.67
   5  -1   4  293.44    3.64
   5   1   0 1570.60    5.63
   6 -16  16   51.52    5.83
   6 -10  13   49.46    4.25
   6  -6  10   76.41    4.12
   6  -5   9   70.63    3.80
   6  -4   8  118.78    3.95
   6  -3   7  478.84    6.00
   6   2  -3    9.69    1.70
   7 -19  17    9.76    5.83
   7 -16  16   26.21    5.68
   7 -10  13   55.71    4.55
   7  -7  11   16.20    5.66
   7  -6  10  615.13    6.61
   7  -3   7   74.00    3.93
   8 -19  17   -1.35    6.22
   8 -16  16   54.83    6.32
   8 -10  13   76.98    4.66
   8  -7  11   66.27    5.64
   8  -6  10   87.88    4.52
   8  -3   7  103.94    4.17
   8  -2 -22   22.18    2.88
   9 -19  17    5.33    6.30
   9 -16  16   16.80    6.33
   9 -10  13    1.28    4.47
   9  -7  11   60.95    6.52
   9  -6  10   45.20    4.57
   9  -4   8  194.76    4.95
   9  -3   7  230.68    5.06
   9  -2 -22    4.89    2.51
  10 -16  16    1.60    7.40
  10 -14  15   15.19    5.61
  10 -10  13   -6.88    4.48
  10  -7  11    0.00    6.08
  10  -6  10   36.45    4.28
  10  -5   9   16.92    4.18
  10  -4   8  145.73    5.01
  10  -3   7   51.08    5.55
  10  -1   4  575.16    6.23
  10   1   0  870.53    5.92
  10   2  -3  157.72    2.90
  11 -16  16    2.88    7.29
  11 -14  15    5.00    5.54
  11 -12  14   97.66    6.24
  11 -10  13   42.59    6.91
  11  -6  10   85.92    6.27
  11  -5   9   52.41    4.54
  11  -4   8   67.66    4.60
  11  -1   4  542.50    6.31
  11   1   0   56.37    3.18
  12 -17  16    6.52    6.15
  12 -14  15   32.81    7.44
  12 -12  14  171.87    7.55
  12  -9  12  146.01    5.92
  12  -5   9   17.65    5.60
  12  -1 -20    7.04    1.43
  12   0   2  235.34    5.03
  12   2  -4  183.66    3.55
  13 -17  16   20.09    7.45
  13  -9  12   -5.50    5.41
  13  -2   5  129.82    4.97
  13   1  -1    9.90    3.36
  13   2 -12  174.15    2.27
  13   2  -5  137.13    3.34
  14 -15  15    1.37    6.21
  14 -13  14    0.33    5.85
  14 -11  13   14.36    5.74
  14  -8  11   -7.90    5.55
  14  -3   6  130.39    5.32
  14  -1   3   50.50    4.36
  14   0   1   -2.98    3.97
  14   1  -1  156.80    5.54
  14   2 -10   37.65    2.25
  14   2  -6   76.81    3.74
  15 -15  15    0.25    7.58
  15 -13  14   20.55    7.31
  15 -11  13   26.58    7.24
  15  -8  11    8.97    6.79
  15  -7  10    1.92    5.41
  15  -6   9   62.82    5.27
  15  -5   8   39.05    4.99
  15  -4   7   39.18    4.92
  15  -3   6   47.78    6.28
  15  -1   3  128.71    6.29
  15   0   1   -2.03    5.33
  15   1  -2  201.95    4.88
  16 -16  15   -6.53    6.39
  16 -14  14   32.31    6.35
  16 -12  13   11.65    6.11
  16 -10  12   11.22    5.79
  16  -6   9   30.38    6.86
  16  -5   8  148.13    7.14
  16  -2   4  268.63    6.24
  16  -1   2   66.51    4.66
  16   0   0   42.51    4.57
  16   1  -3   15.42    3.81
  17 -14  14   21.90    8.23
  17 -12  13    8.51    8.29
  17  -9  11   -4.01    5.88
  17  -8  10   16.42    5.59
  17  -3   5   28.79    4.91
  17   0  -1    3.46    4.53
  17   1 -12   29.72    2.60
  17   1  -4   73.52    5.63
  18 -15  14   18.74    6.47
  18 -13  13   16.60    6.25
  18 -11  12   60.25    8.06
  18  -8  10   11.16    7.45
  18  -7   9   23.39    5.74
  18  -6   8   50.25    5.86
  18  -5   7    0.83    5.51
  18  -4   6   70.17    6.79
  18  -2   3   -6.93    6.22
  18  -1   1    2.21    4.99
  18   0 -15    0.89    2.10
  18   0  -2    5.32    4.68
  18   1 -10   48.48    4.07
  18   1  -9    0.63    3.81
  18   1  -8  137.06    4.25
  18   1  -7   20.96    4.36
  18   1  -6  132.04    5.22
  19 -12  12    8.51    6.33
  19 -10  11   18.56    8.13
  19  -9  10    1.66    5.71
  19  -4   5   20.34    5.61
  19  -3   4  196.54    7.91
  19  -2   2   73.18    5.79
  19  -1   0   -8.56    4.94
  19   0  -3    1.94    4.16
  20 -14  13    4.14    8.43
  20 -11  11   -5.29    6.61
  20  -8   9   18.20    7.57
  20  -7   8  115.52    6.80
  20  -6   7   -0.60    5.97
  20  -5   6    0.30    7.29
  20  -3   3   35.58    5.92
  20  -2   1    7.17    5.13
  20  -1  -1   15.12    5.05
  20   0 -12   17.48    3.36
  20   0  -5  -11.50    3.92
  21 -13  12   11.84    8.39
  21 -10  10   52.56    7.00
  21  -9   9   33.00    6.59
  21  -5   5   16.46    5.86
  21  -4   4   11.35    7.13
  21  -3   2  194.73    7.19
  21  -2   0   94.04    6.16
  21  -1 -14    6.56    2.84
  21  -1  -2  104.24    6.62
  22 -12  11   14.20    8.45
  22 -11  10    5.70    6.72
  22  -8   8   -4.97    7.77
  22  -7   7   22.53    7.92
  22  -6   6    0.72    7.86
  22  -4   3    6.16    6.13
  22  -3   1   -2.97    5.68
  22  -2  -1   -5.71    5.01
  22  -1 -12   10.59    3.69
  22  -1  -5    0.87    4.70
  22  -1  -4  101.62    6.91
  23 -12  10  -17.78    6.88
  23 -10   9    6.81    8.04
  23  -9   8   -3.24    6.12
  23  -8   7   23.94    6.71
  23  -7   6   43.16    6.94
  23  -6   5    8.68    6.74
  23  -4   2    7.97    6.26
  23  -3   0   37.76    6.16
  23  -2 -14    7.27    3.33
  23  -2  -3   31.78    5.61
  23  -2  -2   50.02    6.90
  24 -11   9   11.02    8.86
  24 -10   8   20.29    7.49
  24  -9   7   -4.12    6.79
  24  -7   5   34.48    6.97
  24  -6   4   69.93    7.46
  24  -4   1   14.25    7.84
  24  -3  -1   34.90    7.25
  24  -2 -12   12.64    4.07
  24  -2 -11    4.72    4.47
  24  -2  -6   14.21    5.25
  24  -2  -5   13.85    6.82
  25 -11   8   11.75    7.42
  25  -7   4   28.86    7.42
  25  -6   3   31.03    6.94
  25  -5   1   19.58    6.86
  25  -4  -1   34.30    6.51
  25  -3  -4   50.56    6.22
  25  -3  -3   23.48    8.55
  26  -7   3   14.44    7.51
  26  -6   2   18.85    8.43
  26  -5   0   44.89    7.02
  26  -4  -3    7.72    6.35
  26  -4  -2   58.15    8.23
  26  -3 -10   36.03    5.52
  26  -3  -9    1.59    5.30
  26  -3  -8   13.63    6.82
  26  -3  -7   -0.02    6.47
  27  -7   2   10.05    7.51
  27  -6   0  -11.74    6.94
  27  -5  -2   47.30    7.13
  27  -4  -8   30.52    5.84
  27  -4  -7  -10.97    5.86
  27  -4  -6   11.24    6.29
  27  -4  -5  -13.04    8.09
  28  -8   2   22.84    8.33
  28  -7   1    0.86    8.94
  28  -6  -2   19.10    7.49
  28  -6  -1    3.01    9.10
  28  -5  -5   -5.47    6.25
  28  -5  -4  -16.83    8.25
 -20 -21   0    6.15    5.12
 -20 -20  -1    1.41    5.43
 -20 -19  -2   31.62    6.27
 -20 -18  -4   24.32    9.33
 -20 -18  -3   -0.53    6.19
 -20 -17 -11   -1.69    8.74
 -20 -17 -10    9.07    8.91
 -20 -17  -9   11.08    9.50
 -20 -17  -8    8.72    8.88
 -20 -17  -7   -6.06    8.59
 -20 -17  -6   12.08    6.93
 -20 -17  -5    1.76    6.81
 -19 -21   2   10.72    5.70
 -19 -20   1    6.89    5.83
 -19 -19   1    0.95    4.52
 -19 -18   0    9.86    5.34
 -19 -17  -1   23.23    5.65
 -19 -16 -13   -7.16    9.92
 -19 -16  -3   13.21    7.97
 -19 -16  -2    1.04    5.61
 -19 -15 -12   -2.03    8.05
 -19 -15 -11   15.87    8.19
 -19 -15 -10    3.61   10.79
 -19 -15  -6   -4.94    8.53
 -19 -15  -5   49.22    8.01
 -19 -15  -4   65.09    6.87
 -18 -22   4   10.43    4.85
 -18 -18   2   45.43    5.55
 -18 -17   1    7.66    5.73
 -18 -16   0   36.48    6.56
 -18 -15  -1   45.49    6.92
 -18 -14 -14   20.29    7.77
 -18 -14 -13   -0.68    9.37
 -18 -14  -3   27.73    7.35
 -18 -14  -2   42.99    5.50
 -18 -13 -12   33.66    7.83
 -18 -13 -11   10.50    7.69
 -18 -13 -10   26.47   10.45
 -18 -13  -9   27.12    8.96
 -18 -13  -6   72.64    8.59
 -18 -13  -5   35.43    6.29
 -18 -13  -4   24.99    5.84
 -17 -20   5   -0.25    3.75
 -17 -18   4    1.79    3.73
 -17 -17   3    6.65    4.73
 -17 -14 -16   20.84    9.47
 -17 -14   0   20.15    5.56
 -17 -13 -15    3.60    7.63
 -17 -13  -1   22.37    4.69
 -17 -12 -13    4.87    7.24
 -17 -12 -12  115.88    9.78
 -17 -12  -3   34.72    5.34
 -17 -11 -11    6.51    6.85
 -17 -11 -10   40.11    7.10
 -17 -11  -9   14.42    6.67
 -17 -11  -8   47.26    7.25
 -17 -11  -7  -13.76    6.40
 -17 -11  -6   54.68    6.71
 -16 -22   7    5.80    3.83
 -16 -16   4   96.11    4.96
 -16 -15   3   -4.68    4.58
 -16 -13 -17   -8.18    7.10
 -16 -13   1   30.73    5.13
 -16 -12 -16    9.59    7.20
 -16 -12   0  227.94    5.74
 -16 -11 -14   17.31    7.13
 -16 -11  -2   36.58    6.60
 -16 -10 -12   19.66    6.61
 -16 -10 -11   -1.71    8.43
 -16 -10 -10  -24.66    8.47
 -16 -10  -5   21.62    7.82
 -16 -10  -4  127.33    6.30
 -15 -22   8   24.65    3.59
 -15 -19   7   11.76    3.83
 -15 -17   6    2.78    3.53
 -15 -14   4   69.11    3.73
 -15 -13   3   68.84    4.63
 -15 -12 -18   12.39    7.25
 -15 -12   2   58.19    3.87
 -15 -11 -16   -2.19    8.31
 -15 -10 -15    4.54    6.98
 -15 -10  -1   -2.61    4.61
 -15  -9 -13   11.02    6.21
 -15  -9 -12  -10.10    8.04
 -15  -9  -4   10.01    6.99
 -15  -9  -3   24.53    5.24
 -14 -22   9   -6.14    3.46
 -14 -19   8   32.20    3.64
 -14 -15   6  135.47    4.21
 -14 -12 -19    9.00    8.38
 -14 -11 -18    8.25    8.60
 -14 -10 -17    4.23    6.76
 -14 -10   1   36.76    4.88
 -14  -9 -15   20.23    8.50
 -14  -8 -13    2.76    6.11
 -14  -8  -3   40.99    4.69
 -14  -7  -9   31.34    6.09
 -14  -7  -8   69.84    5.70
 -14  -7  -7  160.40    6.22
 -13 -22  10    4.15    2.57
 -13 -19   9   26.60    3.03
 -13 -15   7   75.52    3.29
 -13 -11 -20   15.26    7.40
 -13  -9 -17   28.65    7.87
 -13  -8 -16   10.71    6.09
 -13  -8 -15   48.17    7.97
 -13  -7 -13   35.30    6.20
 -13  -7  -3    5.15    6.20
 -13  -6  -9  152.44    6.15
 -13  -6  -8   33.29    5.23
 -13  -6  -7   89.83    5.56
 -12 -23  11    3.73    2.10
 -12 -15   8   62.54    3.00
 -12 -12   6  572.04    5.06
 -12 -11   5   -0.63    3.11
 -12 -10 -20   14.60    6.99
 -12 -10   4   70.66    3.68
 -12  -9 -19   26.13    6.23
 -12  -9   3  136.99    3.44
 -12  -8 -17   13.76    8.68
 -12  -7 -16    6.23    6.15
 -12  -7 -15  -13.31    7.75
 -12  -6 -13    9.08    5.14
 -12  -6  -3   42.45    6.04
 -12  -5  -8  137.05    5.68
 -11 -12   7   25.00    2.17
 -11 -10 -21   17.99    6.15
 -11  -9 -20    5.01    6.46
 -11  -8 -19    6.02    6.20
 -11  -8   3   11.31    2.37
 -11  -7 -17    4.43    8.40
 -11  -6 -15  -20.78    7.24
 -11  -5 -13    5.33    5.11
 -11  -5 -12   56.32    6.83
 -11  -5  -3  128.36    4.59
 -10  -9 -21    8.56    7.37
 -10  -8 -20   52.47    6.50
 -10  -7 -19  -10.52    5.99
 -10  -6 -17    4.16    5.66
 -10  -5 -15    6.53    5.81
 -10  -5  -1  216.08    5.22
 -10  -4 -12   85.51    5.36
 -10  -4  -4  298.98    6.52
  -9  -9 -22    0.53    6.42
  -9  -8 -21    0.50    5.98
  -9  -7 -20   25.65    6.19
  -9  -7   4  272.19    2.93
  -9  -5 -17    5.27    5.45
  -9  -5   1  129.69    2.84
  -9  -4 -14   31.87    6.80
  -9  -3 -11  105.15    5.06
  -9  -3 -10   75.33    6.64
  -9  -3  -6  267.11    6.49
  -9  -3  -5   63.37    4.42
  -8  -8 -22   11.21    6.44
  -8  -7 -21    3.35    6.16
  -8  -7   5  113.43    2.07
  -8  -5 -18    3.74    5.47
  -8  -4 -16   35.33    6.52
  -8  -3 -14   37.15    5.15
  -8  -3  -2  110.17    3.32
  -8  -2  -8    8.89    4.19
  -7  -5 -19   40.84    6.78
  -7  -3 -15    3.54    6.24
  -6  -3 -17   -0.03    4.64
  -6  -3   1  161.66    2.32
  -6  -1 -10  411.90    5.68
  -6  -1  -9   18.71    3.72
  -6  -1  -8 1717.99    9.61
  -6  -1  -7  150.26    4.22
  -6  -1  -6  746.23    6.08
  -5  -7 -23    8.17    7.73
  -5  -5 -21    8.44    5.49
  -5  -3   2 1541.10    4.31
  -5  -2 -16   91.17    4.99
  -5  -2   0  478.08    3.32
  -5  -1  -3   95.74    2.93
  -4  -4 -20   31.81    6.70
  -4  -2 -17   74.47    4.82
  -4  -2   1  496.64    2.80
  -4   0 -10  271.27    4.63
  -4   0  -9   10.45    3.26
  -4   0  -8 1203.38    7.37
  -4   0  -7   -0.13    2.57
  -4   0  -6 2068.16    7.88
  -3  -5 -22   47.70    6.77
  -3  -4 -21    9.81    4.83
  -3  -2 -18   80.94    4.75
  -3   0 -12  254.52    5.41
  -2 -21  16   -1.89    2.69
  -2 -11  12   17.55    2.22
  -2  -6 -24   27.26    5.11
  -2  -5   7  241.93    1.99
  -1 -14  14   76.26    3.59
  -1 -12  13   36.21    2.74
  -1  -9  11   30.37    2.24
  -1  -5 -23   -8.17    5.36
  -1  -4 -22   -2.28    5.22
  -1  -2 -19   -9.55    5.31
  -1   0 -15   -6.88    3.23
  -1   1  -5    0.81    1.66
   0  -2   4  112.38    1.83
   0   0 -16  122.63    4.02
   1 -18  16    5.69    3.22
   1 -15  15   -5.60    4.20
   1 -11  13   48.35    3.98
   1  -8  11  151.97    3.70
   1  -5 -24   16.72    5.24
   1  -4 -23    9.17    4.38
   2 -21  17   10.18    4.24
   2  -3 -22    3.53    4.79
   2  -1 -19   -3.01    4.25
   2   0 -17    7.18    4.16
   3 -20  17   -2.97    4.66
   3 -14  15   32.63    5.23
   3 -12  14  183.44    5.38
   3  -2 -21    4.69    4.33
   4 -19  17    1.83    4.91
   4 -16  16   42.56    5.00
   4 -10  13   26.64    4.56
   4  -6  10   37.26    4.23
   4  -5   9   12.83    2.56
   4  -4   8  177.97    3.52
   4  -1   4 2089.06    7.42
   5 -19  17    8.04    5.27
   5 -16  16   11.72    4.38
   5  -7  11   27.63    4.61
   5  -4 -24    2.58    3.99
   5  -3   7  187.16    3.59
   6 -19  17    7.83    4.67
   6 -13  15    1.54    5.36
   6  -7  11   50.23    4.08
   6  -4 -24   30.47    3.77
   6   2 -13   59.39    1.51
   7 -18  17   16.27    5.58
   7 -13  15   30.15    6.36
   7 -11  14   14.10    5.26
   7  -8  12   64.87    5.63
   7  -2   6  116.47    3.62
   8 -18  17    1.52    5.88
   8 -13  15   16.08    6.03
   8 -11  14  103.01    6.55
   8  -8  12   17.71    4.46
   8  -2   6  104.04    4.12
   9 -18  17   -1.56    6.32
   9 -15  16   33.60    6.46
   9 -13  15   21.62    6.72
   9 -11  14   -1.19    6.00
   9  -8  12   63.23    5.02
   9  -3 -23    6.03    2.86
   9  -2   6  473.02    5.95
  10 -18  17   -1.07    6.76
  10 -13  15    6.72    6.56
  10 -11  14   52.32    6.75
  10  -8  12   92.81    6.69
  10  -3 -23    2.79    2.17
  10  -2   6  633.52    6.75
  11 -13  15   -3.28    6.63
  11  -8  12  316.79    7.97
  11  -7  11   40.77    5.15
  11  -3   7  292.94    5.75
  11  -2   6  328.84    7.18
  11   2  -3  984.16    5.84
  12 -16  16   -3.78    6.07
  12 -10  13   30.79    5.45
  12  -7  11   30.86    5.12
  12  -6  10    0.42    4.63
  12  -4   8    5.73    4.34
  12  -3   7   25.51    4.28
  12  -1   4  300.04    5.59
  12   1   0   38.19    3.54
  12   2  -3   40.53    3.92
  13 -16  16    6.15    7.57
  13 -14  15   19.88    6.12
  13 -12  14   46.15    5.78
  13 -10  13   12.56    5.37
  13  -7  11   29.30    6.82
  13  -6  10  235.14    6.29
  13  -5   9   31.80    4.64
  13  -4   8  173.16    5.55
  13  -3   7   -2.88    5.76
  13  -1   4  230.62    5.44
  13   0   2   23.62    4.07
  13   1   0  429.74    6.36
  13   2  -4   57.57    3.15
  14 -17  16   -1.08    6.42
  14 -14  15    2.34    7.27
  14 -12  14   62.59    6.24
  14 -10  13   -6.95    6.68
  14  -9  12   70.98    6.02
  14  -5   9  172.63    7.20
  14  -2   5  179.39    5.51
  14   0   2  370.04    6.96
  14   2 -11  127.87    2.56
  14   2  -5  194.17    4.00
  15  -9  12   25.89    7.00
  15  -2   5  193.47    7.01
  15   1  -1   47.14    5.15
  15   2 -10  312.91    3.88
  15   2  -9   22.65    2.89
  15   2  -8  195.27    3.44
  15   2  -7  307.37    4.78
  15   2  -6   17.99    3.70
  16 -15  15    8.21    8.01
  16 -13  14   32.14    6.37
  16 -11  13    1.27    6.19
  16  -8  11    5.69    6.95
  16  -7  10   17.34    5.53
  16  -4   7   56.12    4.98
  16  -3   6  319.77    7.73
  16  -1   3   -6.72    6.19
  16   0   1   11.19    5.41
  16   1 -14   42.83    1.98
  16   1  -2   70.69    5.29
  17 -16  15   16.74    7.00
  17 -13  14    4.51    7.45
  17 -10  12   43.40    6.29
  17  -7  10   11.62    7.06
  17  -6   9   41.20    6.95
  17  -5   8  201.11    7.85
  17  -2   4   94.26    5.26
  17  -1   2  146.37    5.42
  17   0 -16   13.49    1.51
  17   0   0   -3.05    4.57
  17   1 -13   10.27    2.38
  17   1  -3   18.56    5.80
  18 -14  14    3.54    6.26
  18 -12  13    3.29    7.60
  18  -9  11    8.54    5.70
  18  -3   5   23.32    4.93
  18   0  -1    0.66    4.80
  18   1 -11   30.09    3.21
  18   1  -5   74.56    4.19
  19 -13  13    6.31    6.51
  19 -11  12   50.61    6.52
  19  -8  10   40.76    8.46
  19  -7   9   33.54    6.11
  19  -6   8  129.61    6.77
  19  -5   7   11.31    5.64
  19  -4   6   15.81    6.84
  19  -2   3   62.20    7.22
  19  -1   1   38.73    7.07
  19   0 -14    2.64    2.55
  19   0  -2   32.99    4.73
  20 -13  13  -22.98    8.33
  20 -12  12   11.16    6.39
  20 -10  11   -0.92    8.06
  20  -9  10   32.77    6.69
  20  -4   5   28.39    5.68
  20  -3   4    6.24    7.02
  20  -2 -18    9.59    1.68
  20  -2   2  251.95    7.18
  20  -1   0  115.60    7.06
  20   0  -4   14.70    4.28
  20   0  -3   -4.64    6.10
  21 -12  12   -1.04    8.29
  21 -11  11   16.55    6.54
  21  -8   9   25.48    8.18
  21  -7   8   15.94    6.43
  21  -6   7    4.81    6.38
  21  -5   6    6.19    8.64
  21  -3   3    6.86    5.82
  21  -2 -17   -0.52    2.08
  21  -2   1   21.13    5.64
  21  -1  -1   17.13    6.31
  21   0 -10   26.04    4.12
  21   0  -9    6.25    3.56
  21   0  -8   36.04    3.98
  21   0  -7    0.33    4.11
  21   0  -6   90.73    5.97
  21   0  -5  -12.81    5.28
  22 -13  12    7.84    8.44
  22 -10  10   16.07    6.66
  22  -9   9    6.54    6.58
  22  -5   5   16.76    6.05
  22  -4   4   45.31    7.83
  22  -3   2   27.73    5.91
  22  -2 -16    4.53    2.32
  22  -2   0  152.38    6.60
  22  -1 -13    3.55    3.70
  22  -1  -3    7.39    4.99
  23 -12  11   -4.27    8.59
  23 -11  10    4.30    6.70
  23  -7   7   -9.58    8.18
  23  -5   4   30.13    6.88
  23  -4   3  -14.50    7.61
  23  -3   1   30.66    6.00
  23  -2  -1   24.41    6.90
  23  -1 -11   -1.51    3.97
  23  -1 -10   43.17    4.77
  23  -1  -9   24.57    4.18
  23  -1  -8   11.81    4.50
  23  -1  -7    9.40    4.57
  23  -1  -6   72.75    5.34
  23  -1  -5    4.59    6.39
  24 -10   9    5.16    8.47
  24  -9   8   47.72    8.52
  24  -8   7    7.44    6.89
  24  -7   6   56.49    8.86
  24  -6   5    1.23    8.53
  24  -5   3   13.17    6.66
  24  -4   2   35.37    8.99
  24  -3   0    3.24    8.09
  24  -2 -13    4.76    3.67
  24  -2  -4   87.71    6.08
  24  -2  -3   33.35    7.79
  25 -10   8   32.88    7.65
  25  -9   7   23.14    7.01
  25  -8   6   -6.17    7.06
  25  -7   5    4.89    6.99
  25  -6   4   71.95   10.18
  25  -5   2   15.02    6.82
  25  -4   0   35.38    6.87
  25  -3  -2   44.22    6.29
  25  -2  -9    8.63    5.23
  25  -2  -8    8.12    5.38
  25  -2  -7   -2.09    6.32
  25  -2  -6   -0.51    6.38
  26 -10   7    9.29    7.35
  26  -9   6   -8.82    7.52
  26  -8   5   13.09    7.40
  26  -7   4   11.12    7.29
  26  -6   3   -4.77    8.23
  26  -5   1   -4.24    6.75
  26  -4  -1   25.25    7.82
  26  -3 -11    9.45    4.58
  26  -3  -6   17.95    6.02
  26  -3  -5   22.80    5.69
  26  -3  -4   12.73    7.25
  27  -9   5    3.58    7.74
  27  -8   4    2.37    7.60
  27  -7   3    7.51    8.88
  27  -6   1   -0.20    6.78
  27  -5  -1   24.39    6.89
  27  -4  -4   32.44    6.70
  27  -4  -3   20.18    9.15
  28  -7   2   13.04    9.12
  28  -6   0   69.36    9.09
  28  -5  -3  -10.53    7.13
 -20 -21  -2   44.15    7.68
 -20 -21  -1   -7.77    5.53
 -20 -20  -3    3.20    7.84
 -20 -20  -2   15.34    6.19
 -20 -19  -5   -3.37    8.55
 -20 -19  -4   28.85    8.51
 -20 -19  -3  -11.94    6.45
 -20 -18  -9   -2.13    7.86
 -20 -18  -8   -6.53    8.96
 -20 -18  -7   -6.09    8.49
 -20 -18  -6   20.50    6.84
 -20 -18  -5   13.49    6.72
 -19 -22   2    4.92    4.67
 -19 -21   1    0.87    5.73
 -19 -19   0   25.86    5.32
 -19 -18  -1    2.76    5.70
 -19 -17 -12    5.48    9.98
 -19 -17  -3    5.70    7.54
 -19 -17  -2   45.94    6.04
 -19 -16 -12   23.90    8.48
 -19 -16 -11    4.08    8.03
 -19 -16 -10   58.88    9.91
 -19 -16  -5   13.35    8.73
 -19 -16  -4    4.80    6.15
 -19 -15  -9    2.04    7.56
 -19 -15  -8  -11.58    7.23
 -19 -15  -7    8.26    7.27
 -18 -21   3   -1.65    5.01
 -18 -20   3   -2.32    4.04
 -18 -19   2   -1.04    5.05
 -18 -15 -14  -11.32    7.88
 -18 -15 -13   -2.43    9.49
 -18 -15  -2   18.50    6.86
 -18 -14 -12   13.72    7.83
 -18 -14 -11   -5.58    9.37
 -18 -14 -10   -6.95    9.35
 -18 -14  -5    3.97    8.06
 -18 -14  -4   42.35    6.15
 -18 -13  -8   41.33    7.06
 -18 -13  -7   18.80    6.89
 -17 -21   5   14.09    4.56
 -17 -19   4   39.61    4.77
 -17 -16   2  101.72    5.05
 -17 -15   1    7.44    4.60
 -17 -14 -15   10.06    8.22
 -17 -13 -14   -5.93    7.32
 -17 -13 -13   14.53    9.17
 -17 -13  -2  176.19    6.53
 -17 -12 -11    7.62    7.62
 -17 -12 -10  173.59    9.82
 -17 -12  -9   13.48    8.81
 -17 -12  -6   31.86    8.00
 -17 -12  -5   23.97    7.65
 -17 -12  -4  -10.02    5.82
 -16 -23   7    0.96    3.75
 -16 -20   6    0.24    4.11
 -16 -18   5   24.65    4.39
 -16 -14 -17   -2.77    8.65
 -16 -14   2   58.64    4.42
 -16 -13 -16    8.41    7.25
 -16 -12 -15   -4.99    7.13
 -16 -12 -14   -3.71    9.16
 -16 -12  -1    4.24    6.07
 -16 -11 -13   19.58    7.06
 -16 -11 -12  162.27    9.62
 -16 -11  -3   42.56    5.49
 -16 -10  -9  -16.20    6.25
 -16 -10  -8   55.68    6.69
 -16 -10  -7   22.17    5.71
 -16 -10  -6   47.66    6.61
 -15 -23   8   -4.36    3.33
 -15 -16   5   14.97    3.86
 -15 -13 -18   15.97    7.42
 -15 -12 -17   17.92    7.23
 -15 -11 -15   31.05    8.72
 -15 -11   0   99.17    4.77
 -15 -10 -14   10.61    7.08
 -15 -10 -13   18.25    8.15
 -15 -10  -2    6.31    4.90
 -15  -9 -11    5.79    6.37
 -15  -9 -10   11.69    6.14
 -15  -9  -9   13.01    8.20
 -15  -9  -8   56.10    7.62
 -15  -9  -7  -12.33    7.52
 -15  -9  -6   -2.44    7.21
 -14 -17   7   13.39    3.26
 -14 -14   5   -1.18    3.75
 -14 -13   4  204.23    5.15
 -14 -12 -18   28.34    8.62
 -14 -12   3   10.53    4.37
 -14 -11 -17   13.02    8.27
 -14 -11   2   79.56    3.90
 -14 -10 -16   38.33    7.12
 -14  -9 -14   34.41    6.51
 -14  -9  -1    6.36    4.29
 -14  -8 -12   36.08    6.47
 -14  -8 -11   -2.57    6.04
 -14  -8 -10   -2.59    7.22
 -14  -8  -5  134.82    7.40
 -14  -8  -4   29.50    4.86
 -13 -23  10   -3.87    2.82
 -13 -17   8    9.59    2.82
 -13 -11 -19   -1.56    6.61
 -13 -10 -18    2.91    6.66
 -13  -9 -16   53.00    8.56
 -13  -9   1   66.87    3.84
 -13  -8 -14   66.57    8.99
 -13  -8  -1   74.88    4.58
 -13  -7 -12   11.49    5.88
 -13  -7 -11   69.99    7.73
 -13  -7  -4   76.57    4.99
 -12 -17   9    5.90    2.28
 -12 -11 -20   16.53    8.37
 -12 -10 -19    4.33    7.84
 -12  -9 -18   -3.34    6.29
 -12  -8 -16    8.64    7.59
 -12  -8   1  295.94    5.42
 -12  -7 -14   87.44    7.92
 -12  -7  -1   73.22    5.17
 -12  -6 -12    1.29    5.22
 -12  -6 -11    2.77    7.09
 -12  -6  -4  208.81    5.45
 -11 -20  11    3.59    1.80
 -11 -11 -21  -13.03    7.67
 -11 -11   6  205.91    3.23
 -11 -10 -20    1.86    7.49
 -11 -10   5   55.92    3.15
 -11  -9 -19   48.73    9.04
 -11  -9   4   50.43    2.41
 -11  -8 -18    4.85    6.36
 -11  -7 -16   -7.85    7.56
 -11  -7   1   22.01    4.03
 -11  -6 -14   73.31    7.51
 -11  -6  -1   24.72    3.57
 -11  -5 -11   21.12    5.04
 -11  -5  -4  144.29    5.10
 -10 -21  12   40.40    1.71
 -10 -11   7   91.82    2.18
 -10 -10   6  110.88    2.43
 -10  -9   5   54.40    2.39
 -10  -8 -19   19.12    8.22
 -10  -8   4  329.60    3.47
 -10  -7 -18    7.43    6.00
 -10  -6 -16   60.39    7.58
 -10  -6   1   96.92    2.88
 -10  -5 -14   28.43    5.57
 -10  -4 -11   89.58    5.32
 -10  -4 -10   96.19    5.24
 -10  -4  -9   61.64    6.70
 -10  -4  -6  514.87    8.07
 -10  -4  -5  187.81    5.22
  -9 -10   7  125.99    1.99
  -9  -8 -20   42.30    7.59
  -9  -8   5   97.27    2.40
  -9  -7 -19    1.59    7.68
  -9  -6 -18   47.08    6.09
  -9  -5 -16  152.69    6.62
  -9  -4 -13   81.53    7.24
  -9  -4  -2  188.57    4.30
  -9  -3  -9   56.65    4.78
  -9  -3  -8  297.15    5.79
  -9  -3  -7  231.84    5.41
  -8 -13  10  291.60    1.72
  -8  -9   7    7.19    1.22
  -8  -8 -21   -3.43    7.50
  -8  -8   6  217.30    2.25
  -8  -7 -20   -0.46    7.43
  -8  -6 -19    6.46    5.82
  -8  -5 -17   88.39    7.26
  -8  -5   2  203.93    2.70
  -8  -4 -15   15.65    6.85
  -8  -4   0  253.38    3.43
  -8  -3 -13    3.93    4.95
  -8  -3 -12  162.20    6.94
  -8  -3  -3  201.48    4.85
  -7  -8 -22    8.32    8.42
  -7  -7 -21  -13.70    7.02
  -7  -6 -20    9.66    5.77
  -7  -2 -11   67.82    4.48
  -7  -2 -10  641.19    7.91
  -7  -2  -5   87.34    4.62
  -7  -2  -4   41.75    3.08
  -6 -19  14    8.89    1.30
  -6  -8 -23   -0.84    6.15
  -6  -6 -21    0.31    5.57
  -6  -4 -18   48.51    4.99
  -6  -2  -2  468.30    4.14
  -5 -21  15   11.04    1.88
  -5  -5   5    1.79    0.62
  -5  -4 -19    6.96    5.20
  -5  -3 -17   27.77    6.51
  -5  -2 -15   22.45    4.79
  -5  -1 -12  416.01    5.96
  -5  -1 -11  110.88    5.22
  -5  -1  -4  213.59    4.34
  -4  -7   8  201.17    1.21
  -4  -6 -22   56.07    7.27
  -4  -3 -18   43.17    6.37
  -3 -10  11   83.30    1.85
  -3  -3 -19   -1.89    4.72
  -3  -2 -17   -4.23    5.64
  -3  -1 -15   27.27    4.12
  -3   0  -4 6554.71   11.15
  -2 -17  15    4.82    2.65
  -2  -8  10   17.27    1.99
  -2  -2 -18   50.55    5.40
  -2  -1 -16   48.09    4.02
  -2   0 -13    1.42    4.27
  -1 -19  16   27.90    3.28
  -1  -6 -24    7.05    4.83
  -1   1 -10  221.92    3.57
  -1   1  -9    0.14    2.85
  -1   1  -6 5798.50   10.25
   0 -18  16   81.41    4.05
   0 -13  14   79.71    3.81
   0  -6   9   -3.86    2.34
   0  -5   8  918.50    4.65
   0  -4 -22    0.22    5.38
   0  -3 -21   -5.51    3.89
   0   1 -12 1099.36    6.44
   1 -21  17   -3.72    4.35
   1  -2 -20   26.53    4.05
   1   1 -13   -0.56    3.38
   2 -20  17   -1.00    4.36
   2 -14  15   13.36    4.20
   2 -12  14  127.66    5.08
   2  -4 -23   -1.18    4.09
   2   1 -14  267.67    4.16
   3 -19  17    2.02    4.78
   3 -16  16    3.27    4.96
   3 -10  13   85.56    4.39
   3  -6  10  626.10    6.12
   3  -5   9  159.23    3.57
   3  -4   8 1871.89    7.96
   3  -3 -22   16.83    4.40
   3  -1 -19    6.17    4.56
   3   0 -17   -1.05    3.59
   4  -7  11   17.50    3.39
   4  -3   7   20.50    2.57
   4  -2 -21    2.87    3.98
   4   1   0  719.46    3.79
   5 -18  17    3.24    5.09
   5 -15  16   51.90    5.33
   5 -13  15   27.12    5.17
   5 -11  14   65.98    5.62
   5  -8  12   43.49    4.79
   5  -2   6 1272.93    7.15
   5   2 -12   13.87    1.62
   5   2  -3  342.53    2.18
   6 -18  17   -2.64    4.53
   6 -15  16   -0.72    5.33
   6 -11  14   66.02    4.28
   6  -8  12   58.04    4.26
   6  -2   6  236.08    3.91
   6   1 -16    6.77    2.15
   7 -15  16   78.45    5.15
   7  -9  13  162.26    6.12
   7   0   3    1.66    2.73
   7   1 -16   78.59    2.49
   7   1   1  286.30    4.34
   7   2 -13   62.25    1.44
   7   2  -2   29.76    2.50
   8 -15  16    8.14    4.64
   8  -9  13    3.83    5.44
   8  -1 -20   10.91    2.63
   8  -1   5   23.65    4.48
   8   0   3   -2.69    2.82
   8   1   1    9.41    2.63
   8   2  -2  192.37    2.75
   9  -9  13    8.05    5.80
   9  -1   5  123.21    5.82
   9   1   1  361.87    4.30
   9   2  -2   94.30    2.63
  10 -15  16   13.34    5.61
  10  -9  13    8.86    6.08
  10  -1 -20    6.03    2.05
  10  -1   5   73.89    5.47
  10   0   3   -2.63    3.62
  10   1   1  332.23    4.79
  10   2  -2  151.78    3.08
  11 -18  17   -0.47    5.54
  11 -15  16    4.13    5.63
  11 -11  14   47.15    5.60
  11  -9  13   79.90    7.24
  11   0   3    3.80    3.89
  11   1   1  642.58    6.72
  11   2  -2  728.08    5.88
  12 -15  16    2.37    7.56
  12 -13  15  -11.38    5.76
  12 -11  14   83.95    5.94
  12  -8  12   36.31    5.06
  12  -2   6  282.99    5.70
  12   0   3    6.19    5.62
  12   2 -13   63.57    1.17
  13 -15  16    9.40    7.80
  13 -13  15   -9.82    5.86
  13 -11  14   45.00    6.89
  13  -8  12  128.75    6.30
  13  -2   6  152.60    6.40
  13   2  -3   53.65    3.42
  14 -16  16   12.69    6.83
  14 -13  15   -1.76    7.15
  14  -7  11   16.93    5.60
  14  -6  10   66.22    5.27
  14  -4   8   27.87    4.61
  14  -3   7  140.32    5.41
  14  -1   4    7.01    4.47
  14   1   0  108.40    4.29
  14   2  -4   61.47    3.47
  15 -16  16   -8.03    7.87
  15 -14  15    2.65    6.34
  15 -12  14   33.88    6.42
  15 -10  13    7.24    5.76
  15  -7  11   31.27    7.08
  15  -6  10   58.95    6.71
  15  -5   9   67.57    5.18
  15  -4   8  154.93    7.07
  15  -1   4  267.70    7.05
  15   0   2   91.10    5.93
  15   2  -5  182.58    4.86
  16 -14  15   16.75    7.47
  16 -12  14    6.82    7.46
  16  -9  12   27.18    5.82
  16  -2   5   48.48    4.88
  16   1  -1    7.55    5.34
  16   2  -8   64.76    3.65
  16   2  -7   33.93    3.66
  17 -15  15    8.61    6.92
  17 -11  13    6.02    6.25
  17  -9  12   11.73    7.53
  17  -8  11   18.66    6.01
  17  -4   7   56.90    5.16
  17  -3   6    1.27    4.63
  17  -1   3   20.38    6.72
  17   0   1    1.26    6.20
  17   1  -2  197.02    6.81
  18 -13  14   10.80    7.96
  18 -11  13    7.97    7.78
  18 -10  12    1.38    6.29
  18  -7  10   25.69    7.44
  18  -6   9   -5.61    5.61
  18  -5   8  115.85    6.32
  18  -4   7   34.66    7.53
  18  -2   4   85.81    5.35
  18  -1   2   52.59    5.12
  18   0   0  148.03    5.67
  18   1 -12    8.32    2.82
  18   1  -4  113.42    4.67
  18   1  -3   43.80    5.56
  19 -14  14   10.71    6.63
  19 -12  13    8.08    6.45
  19 -10  12   64.63    8.25
  19  -9  11   18.76    6.40
  19  -3   5   25.31    5.01
  19  -1 -17   -0.38    1.62
  19   0  -1   -8.54    4.74
  19   1 -10    7.08    4.01
  19   1  -9   13.08    3.22
  19   1  -8   55.59    3.85
  19   1  -7   85.30    4.09
  19   1  -6   33.90    3.85
  19   1  -5    6.75    4.89
  20 -11  12   18.01    6.92
  20  -8  10  -10.33    7.93
  20  -7   9   -5.21    5.99
  20  -6   8   19.70    6.22
  20  -5   7   30.95    5.96
  20  -4   6   55.01    7.14
  20  -2   3   36.09    7.44
  20  -1 -16   13.92    2.04
  20  -1   1    7.02    6.46
  20   0 -13   -2.09    2.75
  20   0  -2   55.03    6.89
  21 -13  13   20.56    8.90
  21 -10  11   -1.44    6.88
  21  -9  10  -10.02    6.55
  21  -4   5   15.36    5.97
  21  -2   2   47.18    7.42
  21  -1 -15   -0.65    2.59
  21  -1   0   35.10    6.92
  21   0 -11   -8.99    3.04
  21   0  -4  119.23    6.13
  22 -12  12   10.03    8.45
  22 -11  11   -6.26    6.82
  22  -8   9   12.62    8.09
  22  -7   8   54.24    6.97
  22  -6   7   11.08    8.20
  22  -5   6   82.64    8.21
  22  -3   3   32.55    8.45
  22  -2   1   -3.50    7.23
  22  -1  -2   35.83    5.04
  22   0  -8  -11.69    4.96
  23 -10  10   53.56    8.86
  23  -9   9   -4.98    6.62
  23  -8   8   46.93    7.03
  23  -6   6  102.96    7.77
  23  -5   5  -10.13    6.35
  23  -3   2   40.52    7.79
  23  -2 -15    4.73    2.80
  23  -2   0   -3.66    7.04
  23  -1 -12   17.68    3.82
  23  -1  -4  187.63    6.84
  24 -11  10   33.21    7.16
  24  -5   4   87.00    7.25
  24  -3   1   40.27    7.96
  24  -2  -2   13.98    5.79
  24  -1  -8  129.30    6.24
  25  -9   8   -1.73    8.37
  25  -8   7   21.66    8.67
  25  -7   6   42.59    8.77
  25  -5   3  -10.15    6.61
  25  -4   1   19.07    6.79
  25  -3  -1    7.95    5.83
  25  -2 -11    0.94    4.32
  25  -2 -10    7.72    4.11
  25  -2  -5    1.29    5.47
  25  -2  -4    5.36    8.04
  26  -9   7  -10.90    7.15
  26  -8   6   14.57    7.52
  26  -7   5  -24.91    9.03
  26  -5   2   11.40    6.37
  26  -4   0   65.27    7.27
  26  -3  -3   -1.95    6.16
  27  -8   5   25.29    7.80
  27  -7   4   38.65   10.51
  27  -6   2   22.87    7.05
  27  -5   0   42.62    7.07
  27  -5   1   12.41    8.56
  27  -4  -2   15.17    6.78
  27  -3  -9    0.48    5.67
  27  -3  -8   11.10    6.81
  27  -3  -7   -7.89    7.48
  27  -3  -6    1.10    7.42
  28  -6   1   20.34    8.60
  28  -5  -2    1.66    7.30
  28  -5  -1    7.88    9.20
  28  -4  -6   -2.19    5.93
  28  -4  -5   -8.86    7.63
  28  -4  -4   19.71    7.95
 -20 -21  -3  -10.86    7.93
 -20 -20  -6   19.63    9.17
 -20 -20  -5    6.14    8.26
 -20 -20  -4   35.14    7.15
 -20 -19  -8   36.01    7.58
 -20 -19  -7  -11.04    6.90
 -20 -19  -6   51.74    7.40
 -19 -22   1    6.72    6.02
 -19 -21   0   -9.60    6.18
 -19 -20   0   21.08    5.36
 -19 -19  -1    4.83    5.88
 -19 -18  -3   -1.47    7.59
 -19 -18  -2    2.15    5.65
 -19 -17 -11    2.92    8.47
 -19 -17 -10  -17.55    9.62
 -19 -17  -9   13.38    9.18
 -19 -17  -5   45.35    8.78
 -19 -17  -4   45.86    6.24
 -19 -16  -9   30.08    7.71
 -19 -16  -8   39.09    7.58
 -19 -16  -7    7.41    7.00
 -19 -16  -6    5.33    6.52
 -18 -22   3    4.27    5.11
 -18 -20   2   22.55    5.40
 -18 -18   1   -5.34    4.25
 -18 -17   0   79.02    5.70
 -18 -16 -14   15.72    8.01
 -18 -16 -13   21.10    9.58
 -18 -16  -2   57.79    7.23
 -18 -16  -1   50.09    5.63
 -18 -15 -12   -1.22    8.02
 -18 -15 -11   15.47    9.81
 -18 -15  -4    0.30    7.32
 -18 -15  -3    1.62    5.48
 -18 -14  -9   38.81    7.61
 -18 -14  -8    4.71    7.04
 -18 -14  -7   27.02    7.02
 -18 -14  -6   27.43    6.97
 -17 -22   5    1.84    3.58
 -17 -20   4   10.33    4.49
 -17 -18   3    3.37    3.63
 -17 -17   2  107.02    5.95
 -17 -16   1    3.91    5.66
 -17 -15 -15    6.74    7.80
 -17 -15   0   17.97    5.85
 -17 -14 -14   32.24    7.46
 -17 -14 -13   10.23   10.26
 -17 -14  -1    0.86    4.97
 -17 -13 -12   45.92    7.67
 -17 -13 -11   -3.33    9.37
 -17 -13  -4    3.27    8.25
 -17 -13  -3   -2.25    5.44
 -17 -12  -8   56.37    7.34
 -17 -12  -7    1.14    6.65
 -16 -21   6   50.44    4.29
 -16 -19   5    9.02    4.30
 -16 -17   4   11.67    3.56
 -16 -16   3   -3.89    4.55
 -16 -15   2   10.97    4.97
 -16 -14 -16   10.02    7.63
 -16 -14   1   12.71    4.94
 -16 -13 -15   -8.45    7.13
 -16 -13   0   63.45    4.77
 -16 -12 -13   11.65    7.22
 -16 -12  -2  164.96    7.31
 -16 -11 -11    8.74    6.80
 -16 -11 -10  145.02    7.97
 -16 -11  -9   17.29    9.48
 -16 -11  -8  103.70    8.65
 -16 -11  -7   81.61    8.47
 -16 -11  -6    5.78    7.99
 -16 -11  -5   86.47    8.08
 -16 -11  -4   -3.24    5.21
 -15 -20   7   17.26    3.66
 -15 -18   6   19.40    3.75
 -15 -15   4   83.98    4.61
 -15 -14   3    4.38    4.69
 -15 -13 -17    4.94    6.98
 -15 -13   2  183.53    5.42
 -15 -12 -16   -1.83    6.82
 -15 -12   1   53.66    4.06
 -15 -11 -14   16.54    6.48
 -15 -11  -1  125.66    7.29
 -15 -10 -12   53.50    6.92
 -15 -10 -11    6.01    9.12
 -15 -10  -3   41.05    5.37
 -14 -23   9   -1.42    2.95
 -14 -20   8   16.80    3.34
 -14 -16   6   47.90    3.71
 -14 -11 -16   -0.82    8.40
 -14 -10 -15   -2.92    6.83
 -14 -10   0  679.47    7.50
 -14  -9 -13   -1.69    6.28
 -14  -9 -12   68.43    9.30
 -14  -9  -2   32.22    5.02
 -14  -8  -9   16.15    5.50
 -14  -8  -8   30.31    5.67
 -14  -8  -7  111.60    6.09
 -14  -8  -6    6.84    5.30
 -13 -14   6  185.19    4.10
 -13 -12 -19   -3.81    6.75
 -13 -11 -18   14.75    6.65
 -13 -11   3   20.13    3.77
 -13 -10 -17  -13.94    6.46
 -13 -10   2  145.76    4.00
 -13  -9 -15    5.21    7.81
 -13  -8 -13   30.18    5.99
 -13  -8  -2   91.22    6.55
 -13  -7 -10   42.22    5.34
 -13  -7  -9   34.00    5.38
 -13  -7  -8   29.25    5.36
 -13  -7  -7  169.40    7.57
 -13  -7  -6  112.07    5.71
 -13  -7  -5  137.54    5.58
 -12 -20  10    9.60    2.61
 -12 -12 -20  -13.50    8.54
 -12 -10 -18   48.18    8.11
 -12  -9 -17   47.48    6.68
 -12  -9   2   24.12    3.93
 -12  -8 -15   28.08    8.01
 -12  -7 -13   11.69    7.42
 -12  -6 -10    7.37    5.09
 -12  -6  -9   99.75    5.70
 -12  -6  -8  117.89    7.13
 -12  -6  -7   41.94    6.49
 -12  -6  -6   31.65    4.93
 -12  -6  -5   -2.97    4.43
 -11  -8 -17   -9.04    7.33
 -11  -7 -15   32.65    7.28
 -11  -6 -13   -5.06    6.95
 -11  -6  -2  111.89    5.46
 -11  -5 -10   23.20    4.77
 -11  -5  -9   40.38    5.01
 -11  -5  -8  139.25    5.59
 -11  -5  -7   25.37    4.77
 -11  -5  -6   98.14    5.09
 -11  -5  -5    2.27    4.47
 -10 -18  11    8.79    1.40
 -10 -14   9    3.46    1.85
 -10 -10 -21    9.12    6.06
 -10  -9 -20    7.23    6.16
 -10  -7 -17   18.30    5.84
 -10  -6 -15   27.64    7.58
 -10  -5 -13   -3.54    5.12
 -10  -5  -2  124.35    4.27
 -10  -4  -8  153.24    5.43
 -10  -4  -7    6.91    4.54
  -9  -9 -21   10.14    6.11
  -9  -9   6   70.56    1.98
  -9  -6 -17   71.77    6.08
  -9  -6   2  131.75    3.14
  -9  -5 -15   28.88    5.80
  -9  -5   0  256.16    4.43
  -9  -4 -12    7.68    5.96
  -8 -17  12    5.90    0.85
  -8  -6 -18   31.29    7.87
  -8  -4 -14   29.61    6.75
  -8  -3 -11  148.47    5.26
  -8  -3  -4   46.93    4.60
  -7  -5 -18   56.88    5.66
  -7  -5   3   38.27    1.47
  -7  -4 -16   -1.27    5.34
  -7  -3 -14   -1.24    4.89
  -7  -3  -1  100.53    2.88
  -7  -2  -9   37.14    4.17
  -7  -2  -8  375.72    5.70
  -7  -2  -7  173.35    4.61
  -7  -2  -6  150.11    4.44
  -6  -6 -20  158.76    8.15
  -6  -5 -19   18.56    5.08
  -6  -5   4   23.08    1.33
  -6  -3 -15   16.91    6.77
  -6  -2 -12   84.95    5.98
  -5 -15  13   26.88    1.55
  -5 -13  12   14.40    1.30
  -5  -8 -23    2.31    7.02
  -5  -6 -21    4.73    6.91
  -5  -5 -20   69.95    5.67
  -5  -2 -14   25.67    6.21
  -5  -1 -10  159.23    5.34
  -5  -1  -5   28.94    3.93
  -4 -19  15   10.59    1.99
  -4 -14  13   18.68    1.88
  -4  -7 -23   -5.88    5.68
  -4  -4 -19   13.89    6.48
  -4  -1 -13   17.69    3.95
  -4  -1  -2   31.99    2.29
  -3 -13  13   26.28    2.33
  -3  -1 -14   32.83    5.48
  -3   0 -10  220.13    4.17
  -3   0  -5   -4.35    3.17
  -2  -6 -23    5.27    5.04
  -2  -5 -22    0.05    4.75
  -2   0 -12   23.96    4.18
  -1 -10  12   85.21    2.80
  -1  -4 -21    5.23    5.51
  -1  -3 -20   29.15    4.63
  -1   0 -14 1006.25    7.42
  -1   1  -8  767.04    4.65
  -1   1  -7   -0.03    1.84
   0 -15  15    6.65    3.33
   0 -11  13    7.40    3.19
   0  -7  10 1285.70    5.83
   0  -6 -24   11.88    4.85
   0  -5 -23  -12.65    4.40
   0  -4   7   -0.03    1.86
   0  -1 -17    7.41    4.95
   0   0 -15    1.47    3.05
   1  -9  12  102.32    3.97
   1  -3 -21   -2.05    3.92
   1  -1   3    1.59    1.87
   2 -19  17   22.54    4.37
   2 -16  16   34.77    4.50
   2 -10  13  104.97    4.53
   2  -2 -20   39.92    3.95
   3  -7  11   38.53    3.18
   3  -5 -24    5.32    4.74
   3  -4 -23   -0.84    3.87
   3  -3   7   -0.43    3.08
   3  -1   4 3726.85    8.45
   3   0   2  578.55    3.39
   4 -18  17   -0.17    5.07
   4 -15  16    1.40    5.34
   4 -13  15   -1.63    3.91
   4 -11  14   13.25    4.72
   4  -8  12    8.17    3.35
   4  -4 -23   -0.10    4.40
   4  -3 -22   20.87    4.17
   4  -1 -19    1.71    3.72
   4   2 -11  159.45    2.19
   5  -9  13  195.26    6.09
   6 -17  17   19.46    6.30
   6  -9  13   37.23    4.13
   6  -1   5   14.75    3.90
   6   0   3   -4.50    2.66
   6   1   1   37.15    3.41
   7 -17  17    5.57    4.66
   7 -14  16   -9.58    5.64
   7 -12  15    7.91    5.97
   7  -5  10   57.62    5.58
   7  -4   9  166.31    5.46
   7  -1   5   96.19    3.41
   7   0 -18   30.03    2.42
   8 -17  17    7.20    4.58
   8 -14  16    8.36    6.03
   8 -12  15   42.75    5.12
   8 -10  14   23.71    5.68
   8  -6  11   71.10    6.09
   8  -5  10   78.38    4.25
   8  -4   9  228.22    4.97
   8  -3   8  111.85    5.38
   9 -17  17    1.94    5.04
   9 -14  16   20.11    6.48
   9 -12  15   67.59    5.73
   9 -10  14  107.52    7.07
   9  -6  11  149.70    5.43
   9  -5  10   24.22    4.04
   9  -3   8  249.45    6.62
  10 -17  17    9.07    5.44
  10 -14  16   50.39    6.93
  10 -12  15   17.31    5.70
  10 -10  14   59.84    6.82
  10  -6  11   27.56    4.92
  10  -5  10   54.49    4.47
  10  -4   9   47.18    4.50
  10  -3   8   91.86    5.83
  11 -17  17    3.49    5.83
  11 -14  16    6.95    6.83
  11 -12  15   -5.98    5.30
  11 -10  14   87.14    6.52
  11  -6  11   22.67    6.40
  11  -5  10    4.99    4.35
  11  -4   9   18.81    4.31
  11  -3   8  333.93    7.39
  11  -1   5   97.34    4.53
  11   1 -16   80.55    1.27
  12 -17  17  -10.77    6.04
  12 -14  16   35.60    7.31
  12 -12  15   -6.63    6.79
  12  -9  13   87.75    5.99
  12  -6  11   -5.94    6.55
  12  -5  10   81.20    6.43
  12  -4   9   -0.56    6.31
  12  -1   5  108.71    4.68
  12   0 -18   27.69    1.27
  12   1   1  104.72    4.14
  12   2  -2  120.42    3.27
  13  -9  13   24.64    5.65
  13  -1   5   95.04    6.51
  13   0   3   -1.59    4.08
  13   1   1    3.38    4.89
  13   2  -2  135.63    4.89
  14 -15  16   16.47    6.42
  14 -11  14   23.43    5.69
  14  -9  13  -11.13    6.96
  14  -8  12   31.49    5.64
  14  -2   6   80.11    4.94
  14   0   3   -4.14    5.86
  14   2 -12   18.77    1.65
  14   2  -3  447.23    5.40
  15 -15  16   21.45    7.78
  15 -13  15    7.79    6.19
  15 -11  14    4.99    6.09
  15  -8  12   21.72    5.60
  15  -3   7   50.81    4.98
  15  -2   6    2.75    6.53
  15   1 -15    4.57    1.25
  15   1   0    3.77    3.75
  15   2 -11   17.53    2.24
  15   2  -4   14.65    3.49
  16 -13  15    3.70    7.53
  16 -10  13    7.37    5.67
  16  -7  11   14.64    5.69
  16  -6  10    2.00    5.53
  16  -5   9   13.36    4.86
  16  -4   8   12.82    4.82
  16  -3   7   66.71    6.98
  16  -1   4   94.75    6.40
  16   0 -17    0.45    0.98
  16   0   2   74.37    4.63
  16   2 -10    9.19    3.03
  16   2  -9   33.03    2.52
  16   2  -6   71.75    3.46
  16   2  -5   45.66    4.79
  17 -14  15   -3.23    6.19
  17 -12  14   33.83    6.64
  17 -10  13    5.67    7.80
  17  -6  10   41.29    7.25
  17  -5   9    5.94    6.87
  17  -2   5    3.34    4.62
  17   1  -1   17.98    5.85
  18 -14  15    1.04    7.69
  18 -12  14    0.90    7.58
  18  -9  12   29.67    7.86
  18  -8  11   40.21    6.14
  18  -3   6   41.66    5.72
  18  -1   3   34.70    6.32
  18   0   1   -3.63    6.24
  18   1  -2    7.04    5.58
  19 -13  14   22.97    6.56
  19 -11  13    5.94    7.53
  19  -8  11    1.52    7.92
  19  -7  10   36.66    6.57
  19  -6   9   -1.70    5.86
  19  -5   8    2.19    5.73
  19  -4   7    3.11    7.09
  19  -2   4   11.14    5.12
  19  -1   2  111.18    5.98
  19   0 -15    8.41    2.19
  19   0   0   63.86    6.64
  19   1 -11   -2.36    3.57
  19   1  -4  134.58    4.94
  20 -12  13    2.92    6.68
  20 -10  12   33.29    8.39
  20  -9  11   -2.76    6.53
  20  -3   5   30.71    5.81
  20   0  -1    3.06    6.18
  20   1  -8   58.98    4.84
  20   1  -7   30.14    5.23
  20   1  -6  104.84    5.79
  21 -11  12   56.79    7.45
  21  -8  10   69.89    7.10
  21  -7   9   17.58    6.49
  21  -6   8   87.94    7.26
  21  -5   7   12.36    5.96
  21  -4   6   59.79    8.08
  21  -3   4  175.86    7.20
  21   0 -12    8.11    3.38
  21   0  -3    6.75    4.44
  22 -10  11    5.47    6.87
  22  -9  10   46.71    6.97
  22  -4   5    5.83    5.99
  22  -2   2   55.91    7.56
  22  -1 -14   23.22    3.18
  22  -1  -1    2.32    5.29
  22   0 -10    7.29    4.43
  22   0  -9    1.18    3.95
  22   0  -7    4.18    4.27
  22   0  -6   54.92    4.81
  22   0  -5    6.36    5.84
  23 -11  11  -12.16    6.95
  23  -8   9   -5.54    7.89
  23  -7   8   40.81    8.50
  23  -6   7   17.98    8.43
  23  -4   4   69.69    6.63
  23  -3   3   53.92    7.76
  23  -2   1   39.25    7.42
  23  -1 -13    1.97    3.42
  23  -1  -3   16.64    5.26
  23  -1  -2  261.66    8.93
  24 -10  10   -3.00    8.44
  24  -9   9   -1.10    7.02
  24  -8   8  -14.12    6.78
  24  -7   7   17.29    7.18
  24  -6   6  119.69    8.07
  24  -5   5   15.09    8.43
  24  -4   3   31.44    6.78
  24  -2 -14    6.85    3.19
  24  -2  -1   40.85    6.06
  24  -1 -10   11.11    4.58
  24  -1  -9    1.95    4.05
  24  -1  -7   -2.09    4.63
  24  -1  -6  121.46    5.95
  24  -1  -5   20.84    6.70
  24  -1  -4   19.03    7.31
  25 -10   9   -4.96    7.59
  25  -6   5   15.02    7.12
  25  -5   4   94.82    9.16
  25  -4   2   11.04    6.68
  25  -3   0   -2.87    6.69
  25  -2 -12   25.49    4.27
  25  -2  -3    2.25    5.97
  26  -8   7   -2.36    8.81
  26  -6   4   20.13    7.22
  26  -5   3   25.53    8.30
  26  -4   1   20.68    6.99
  26  -3  -2   13.05    6.45
  26  -3  -1    0.77    7.69
  26  -2  -9    9.34    5.40
  26  -2  -8    3.56    5.42
  26  -2  -7   -2.64    5.87
  26  -2  -6   -8.15    7.27
  27  -8   6   15.02    8.94
  27  -6   3   -4.70    6.94
  27  -5   2   35.02    8.51
  27  -4  -1    3.16    6.69
  27  -3  -5   -8.97    6.10
  27  -3  -4   10.81    7.88
  28  -7   3   -4.73    8.30
  28  -6   2    5.62    9.10
  28  -5   0   -0.64    8.60
  28  -4  -3   -5.06    6.93
 -19 -22   0    9.63    6.36
 -19 -21  -1    7.81    6.78
 -19 -20  -2    4.08    7.33
 -19 -20  -1    2.62    5.94
 -19 -19  -3    4.63    8.25
 -19 -19  -2   50.62    6.40
 -19 -18 -11    6.31    8.43
 -19 -18 -10    4.49    8.38
 -19 -18  -9  -11.93   10.29
 -19 -18  -8    7.89    9.13
 -19 -18  -7    1.15    8.76
 -19 -18  -6    8.03    8.42
 -19 -18  -5    2.51    7.91
 -19 -18  -4   16.62    6.59
 -19 -17  -8  -15.71    7.22
 -19 -17  -7   25.12    6.84
 -19 -17  -6   -9.28    6.79
 -18 -21   2   -8.95    5.05
 -18 -19   1    1.45    4.29
 -18 -18   0   61.40    5.67
 -18 -17 -13   -6.40    7.91
 -18 -17  -1   -4.38    5.40
 -18 -16 -12    6.73    8.02
 -18 -16 -11   -7.68    9.64
 -18 -16  -3   25.37    7.37
 -18 -15 -10   26.45    7.77
 -18 -15  -9   19.46    7.42
 -18 -15  -8   60.70    7.72
 -18 -15  -7    6.23    6.88
 -18 -15  -6   43.84    7.06
 -18 -15  -5    6.06    6.08
 -17 -21   4    9.89    4.66
 -17 -19   3    0.41    4.82
 -17 -18   2   41.66    5.43
 -17 -16 -15    0.60    7.87
 -17 -15 -14   14.57    7.63
 -17 -15 -13   35.74   10.28
 -17 -15  -1   11.72    6.38
 -17 -14 -12    3.54    7.51
 -17 -14 -11  -10.50    9.32
 -17 -14  -3   13.53    7.27
 -17 -14  -2   -2.00    5.03
 -17 -13 -10   31.16    7.56
 -17 -13  -9   -1.10    6.76
 -17 -13  -8   19.49    6.96
 -17 -13  -7    9.00    6.52
 -17 -13  -6   41.67    6.61
 -17 -13  -5   12.44    6.07
 -16 -22   6    1.18    4.32
 -16 -18   4   68.77    4.92
 -16 -15 -16   17.58    7.22
 -16 -14 -15   12.15    7.13
 -16 -13 -14   51.15    7.36
 -16 -13 -13   -1.62    8.87
 -16 -13  -1   39.39    4.80
 -16 -12 -12   46.90    7.57
 -16 -12 -11   34.86    6.92
 -16 -12 -10   -5.14    8.77
 -16 -12  -4  178.99    8.12
 -16 -12  -3   10.62    5.24
 -15 -21   7   11.06    4.17
 -15 -17   5    4.80    4.37
 -15 -14 -17   -1.44    7.12
 -15 -13 -16   37.43    7.27
 -15 -12 -15    1.81    6.72
 -15 -12 -14   14.10    8.90
 -15 -12   0    4.87    5.30
 -15 -11 -13   17.36    7.12
 -15 -11 -12   13.10    8.45
 -15 -11  -2  296.52    8.50
 -15 -10 -10  111.48    7.15
 -15 -10  -9   23.45    6.39
 -15 -10  -8  161.70    8.96
 -15 -10  -7   13.06    7.77
 -15 -10  -6  128.91    7.92
 -15 -10  -5   35.30    5.84
 -15 -10  -4   16.31    5.54
 -14 -18   7   26.61    3.53
 -14 -15   5   10.54    3.86
 -14 -13 -18    4.23    7.45
 -14 -12 -17    7.91    7.00
 -14 -11 -15   20.94    8.40
 -14 -11   1  150.83    4.71
 -14 -10 -14   36.60    6.79
 -14 -10 -13  -11.11    8.94
 -14 -10  -1   32.82    5.99
 -14  -9 -11   14.42    6.37
 -14  -9 -10  130.56    8.40
 -14  -9  -4   29.99    7.23
 -14  -9  -3   16.48    5.09
 -13 -20   9   14.33    2.69
 -13 -16   7    3.62    2.95
 -13 -13 -19   -7.03    8.17
 -13 -13   5    2.10    2.46
 -13 -12 -18   31.28    8.72
 -13 -12   4  332.46    4.56
 -13 -11 -17   16.95    8.05
 -13 -10 -16    6.86    6.70
 -13  -9 -14   -1.35    6.19
 -13  -9   0  513.79    6.34
 -13  -8 -12  134.28    6.82
 -13  -8 -11   67.85    7.82
 -13  -8  -3  301.53    7.24
 -12 -14   7   33.35    2.49
 -12 -11 -19    4.04    6.78
 -12 -10   3  143.48    4.16
 -12  -9 -16   27.93    6.15
 -12  -8 -14    8.64    8.26
 -12  -8   0 1034.69    7.76
 -12  -7 -12  376.07    7.78
 -12  -7  -3   50.88    5.88
 -12  -7  -2   66.60    4.38
 -11 -14   8  106.81    2.78
 -11 -11 -20    9.26    6.59
 -11 -10 -19   12.70    6.12
 -11  -9 -18   48.49    6.67
 -11  -8 -16    0.47    8.52
 -11  -8   2   44.99    2.92
 -11  -7 -14    3.67    7.29
 -11  -7   0  216.77    5.15
 -11  -6 -12  138.18    6.10
 -10 -16  10    6.66    1.78
 -10 -11 -21   14.18    6.08
 -10 -10 -20   18.84    8.01
 -10  -9 -19  -10.04    5.87
 -10  -8 -18   20.89    5.98
 -10  -7 -16   34.88    8.15
 -10  -7   2  156.05    3.30
 -10  -6 -14  199.08    8.32
 -10  -6   0  542.83    5.14
 -10  -5 -12   33.73    4.96
 -10  -5 -11   24.08    6.65
 -10  -5  -3   10.41    5.13
  -9 -10 -21  -15.73    7.11
  -9  -9 -20    8.18    7.48
  -9  -8 -19    6.79    5.90
  -9  -7 -18   15.01    5.81
  -9  -6 -16   94.29    6.20
  -9  -5 -14  119.04    6.09
  -9  -4 -11    9.50    4.60
  -9  -4 -10   -3.38    5.94
  -9  -4  -4  368.78    6.49
  -9  -4  -3   10.89    3.21
  -8 -10 -22    9.33    7.90
  -8  -9 -21   -1.78    7.36
  -8  -8 -20  -11.64    7.18
  -8  -7 -19    2.47    5.47
  -8  -5 -16   41.58    5.68
  -8  -4 -13   30.68    6.57
  -8  -4  -1  684.95    5.87
  -8  -3 -10  306.20    5.94
  -8  -3  -9   93.30    4.84
  -8  -3  -8  197.35    6.26
  -8  -3  -6  124.05    5.84
  -8  -3  -5  170.55    4.80
  -7  -7 -20   49.02    6.04
  -7  -5 -17  -14.37    6.39
  -7  -4 -15    7.33    6.93
  -7  -4   1   14.04    1.87
  -7  -3 -13    5.26    4.90
  -6  -9 -23    6.27    6.21
  -6  -7 -21   -0.06    6.03
  -6  -2 -11  147.32    5.90
  -6  -2  -3    2.69    2.67
  -5  -5 -19   -1.87    6.33
  -5  -2 -13  104.27    5.85
  -5  -2  -1 2544.15    7.48
  -5  -1  -9  101.60    4.04
  -5  -1  -8 1047.80    6.94
  -5  -1  -7    4.56    2.86
  -5  -1  -6  503.42    4.85
  -4 -16  14   39.14    1.93
  -4 -12  12   36.49    1.74
  -4  -5 -20   41.50    6.66
  -4  -3 -17   -3.18    4.23
  -4  -2 -15    8.70    4.22
  -4  -1 -12   52.60    4.08
  -3 -21  16    4.17    2.37
  -3 -15  14   11.17    2.09
  -3  -7 -23    6.24    5.48
  -3  -5 -21    3.63    5.32
  -3  -3 -18  124.42    5.04
  -3   0  -9    6.21    2.62
  -3   0  -8   96.81    2.98
  -3   0  -7   -4.67    3.33
  -3   0  -6  335.76    3.65
  -2  -2 -17   10.68    4.95
  -2  -1 -15   13.68    3.72
  -1  -7 -24    2.67    6.13
  -1  -6 -23    5.44    5.81
  -1  -5 -22   15.54    5.82
  -1  -2 -18   -1.29    4.16
   0 -21  17   -6.47    3.36
   0 -17  16    8.78    3.41
   0  -8  11    9.54    2.46
   0  -3 -20   17.95    5.39
   0   1 -10 1552.13    6.98
   1 -12  14   72.93    4.10
   1  -6 -24    5.15    4.64
   1  -5 -23   -7.30    4.33
   1  -2 -19  -10.05    5.36
   1   0 -15   -2.15    3.63
   2  -6  10   79.96    2.96
   2  -4   8  565.92    4.69
   2  -1 -18   -0.37    3.45
   2   0 -16    6.51    2.93
   2   1 -13    4.19    2.94
   3 -18  17   -0.60    4.69
   3 -15  16   34.99    5.11
   3 -13  15   14.59    3.62
   3 -11  14  130.85    4.95
   3  -8  12  171.79    4.76
   3  -2 -20   15.98    4.25
   3   2  -9   51.86    1.73
   4 -17  17   -2.66    4.68
   4  -9  13   68.29    5.02
   4  -5 -24   13.47    3.79
   4  -2   6 2582.40    8.53
   5 -17  17    2.39    4.13
   5 -14  16    6.83    5.16
   5 -12  15   -3.17    5.38
   5  -5 -24   25.60    4.43
   5  -4 -23    8.25    4.17
   5  -3 -22   38.25    4.09
   5   0   3    1.97    2.54
   6 -14  16   -2.56    4.20
   6 -12  15    2.16    4.33
   6 -10  14  244.73    6.75
   6  -6  11   -0.58    3.76
   6  -5  10  891.77    7.32
   6  -4   9   18.27    3.44
   6  -3 -22   10.67    3.65
   6  -3   8 1034.20    7.54
   6   2  -2  444.90    2.95
   7 -16  17    0.35    6.05
   7 -10  14   84.92    4.73
   7  -7  12  304.44    6.84
   7  -6  11   60.53    4.31
   8 -16  17    1.84    5.84
   8  -7  12   50.81    4.62
   8  -2   7  351.31    6.24
   8   0 -18   95.20    2.62
   8   2 -13   15.41    1.10
   9 -16  17    5.67    5.06
   9  -8  13   14.30    5.90
   9  -7  12   42.02    5.10
   9  -2   7   22.32    4.08
   9   0 -18   15.72    2.07
   9   0   4  317.59    5.66
   9   1 -16   70.50    1.80
   9   2  -1  136.71    2.98
  10 -16  17   10.51    5.36
  10  -8  13   59.54    6.47
  10  -7  12   79.13    5.36
  10  -2   7  352.87    5.83
  10   0   4 1761.63    9.96
  10   1 -16   42.13    1.45
  10   1   2  252.27    5.57
  10   2  -1 1557.82    7.27
  11 -16  17    1.71    5.77
  11  -8  13  107.33    7.04
  11  -7  12   38.05    5.31
  11  -2   7   28.94    4.32
  11   0 -18   33.09    1.62
  11   0   4  470.89    6.99
  11   2  -1  218.42    4.57
  12 -16  17    7.00    7.44
  12 -10  14   46.52    5.72
  12  -7  12  368.46    7.38
  12  -3   8  254.08    5.89
  12  -2   7  253.40    7.20
  12   2  -1   62.17    4.48
  13 -16  17   18.25    8.25
  13 -14  16   22.25    6.17
  13 -12  15    1.13    5.75
  13 -10  14   32.67    5.64
  13  -7  12   20.99    6.97
  13  -6  11    2.68    5.16
  13  -5  10   75.20    5.15
  13  -4   9   10.33    4.59
  13  -3   8  103.81    5.13
  14 -14  16   -0.90    6.22
  14 -12  15   36.38    6.16
  14 -10  14   42.75    8.04
  14  -6  11  155.30    7.42
  14  -5  10  182.10    6.11
  14  -4   9   26.14    4.96
  14  -3   8  159.33    7.29
  14  -1   5  157.15    5.35
  14   1   1  182.32    4.91
  14   2  -2  415.81    6.20
  15 -14  16  -11.33    7.66
  15 -12  15   13.44    7.97
  15  -9  13   12.89    5.61
  15  -5  10    8.03    6.75
  15  -1   5   13.72    6.00
  15   0   3   -9.85    4.22
  15   2  -3   85.56    4.11
  16 -15  16   19.42    6.79
  16 -11  14   14.57    6.26
  16  -9  13    7.98    8.04
  16  -8  12    3.85    5.80
  16  -2   6   53.99    5.06
  16   1   0   33.49    4.41
  16   2  -4  347.41    5.38
  17 -13  15    3.45    6.21
  17 -11  14    8.40    7.68
  17  -8  12    5.83    7.33
  17  -7  11   19.98    5.94
  17  -4   8   86.26    6.03
  17  -3   7   -3.66    4.53
  17  -1   4   61.70    5.30
  17   0   2   42.49    4.86
  17   1 -14   20.36    2.01
  17   2  -9    3.90    3.46
  17   2  -8  206.20    4.66
  17   2  -7   60.79    3.47
  17   2  -6  142.98    4.73
  17   2  -5   -7.55    4.34
  18 -10  13    7.90    6.17
  18  -7  11   21.55    7.43
  18  -6  10    3.75    7.16
  18  -5   9    7.45    6.91
  18  -4   8    5.92    6.89
  18  -2   5   33.69    5.78
  18  -1 -18    7.18    1.10
  18   0 -16   58.78    2.17
  18   1 -13    9.46    2.36
  18   1  -1   19.07    5.89
  19 -12  14    9.65    7.99
  19  -9  12   34.38    6.70
  19  -3   6   25.86    5.72
  19  -1   3   12.92    6.87
  19   0   1   -0.29    6.53
  19   1 -12   36.22    3.01
  19   1  -3   20.93    4.30
  20 -13  14    2.17    6.78
  20 -11  13    6.81    7.00
  20  -8  11   10.01    7.99
  20  -7  10   43.01    7.20
  20  -6   9   15.48    6.31
  20  -5   8   39.06    6.13
  20  -4   7   17.42    7.34
  20  -2   4   56.97    6.03
  20  -1   2   66.35    5.83
  20   0 -14   45.11    2.67
  20   0   0   27.03    6.98
  20   1 -10    7.10    4.28
  20   1  -9    7.03    3.24
  20   1  -5   58.75    4.39
  20   1  -4   89.19    5.77
  21 -12  13    7.22    7.21
  21 -10  12   64.30    7.17
  21  -9  11    4.04    6.76
  21  -3   5   -4.45    5.83
  21  -2   3   12.72    5.88
  21  -1   1   34.48    5.74
  21   0 -13   -3.32    3.19
  21   0  -2   22.76    4.76
  21   0  -1   -9.56    6.14
  22 -11  12   26.11    7.10
  22  -9  11   -7.69    7.98
  22  -8  10    2.09    6.87
  22  -7   9   19.36    6.74
  22  -6   8   15.79    6.50
  22  -5   7  -11.82    6.05
  22  -4   6    3.95    7.74
  22  -3   4   18.61    6.39
  22  -1   0   60.22    5.92
  22   0 -11    4.96    3.73
  22   0  -4  170.22    6.42
  22   0  -3   -2.32    6.23
  23 -10  11   -9.31    6.79
  23  -9  10    0.20    6.79
  23  -5   6   54.68    7.00
  23  -4   5   -0.84    6.23
  23  -1  -1   19.53    6.84
  23   0  -8   80.85    5.53
  23   0  -7   -8.04    5.89
  23   0  -6  154.19    6.86
  24  -8   9    6.85    9.58
  24  -7   8   46.70    8.56
  24  -6   7   13.95    8.39
  24  -4   4   48.68    7.01
  24  -3   2    6.70    6.54
  24  -2   0   76.42    6.52
  24  -1 -11    2.62    3.39
  24  -1  -3   19.77    5.75
  25  -9   9   -3.27    7.45
  25  -8   8    5.46    7.08
  25  -7   7   27.78    7.46
  25  -6   6   28.93    6.99
  25  -5   5   11.24    8.75
  25  -4   3   -6.64    6.82
  25  -3   1   18.35    6.54
  25  -2  -2   11.30    6.21
  25  -2  -1   11.65    7.96
  25  -1  -8   -7.37    5.28
  25  -1  -7   -1.32    5.72
  25  -1  -6   33.85    6.09
  26  -9   8   14.73    7.68
  26  -7   6    4.63    7.44
  26  -6   5    4.45    7.31
  26  -5   4  -19.07    8.62
  26  -4   2   43.27    7.15
  26  -3   0    0.28    7.99
  26  -2 -11    2.33    4.38
  26  -2 -10   26.19    4.24
  26  -2  -5   22.76    5.94
  26  -2  -4   -5.68    6.20
  26  -2  -3   -5.01    7.20
  27  -7   5   -7.32    7.30
  27  -6   4   14.80    7.44
  27  -4   0   11.18    6.90
  27  -4   1   -5.05    8.23
  27  -3  -3   11.79    6.31
  27  -3  -2   62.01    8.64
  28  -7   4    7.96    8.37
  28  -6   3   -8.32    9.36
  28  -5   1    2.36    6.80
  28  -4  -2   53.15    7.77
  28  -4  -1   -1.11    8.22
  28  -3  -6   -2.64    6.87
  28  -3  -5  -15.27    7.36
 -19 -22  -1   13.78    6.83
 -19 -21  -2    7.45    7.47
 -19 -20  -4   31.60    8.07
 -19 -20  -3   10.60    7.57
 -19 -19  -9    7.39    7.93
 -19 -19  -8    2.34    9.18
 -19 -19  -7  -14.79    8.36
 -19 -19  -6   42.20    8.57
 -19 -19  -5    4.20    6.64
 -19 -19  -4    1.93    6.75
 -18 -22   2   10.38    4.83
 -18 -21   1   12.57    5.84
 -18 -20   1    2.12    4.57
 -18 -19   0   -3.14    5.38
 -18 -18 -12   14.85    9.59
 -18 -18  -1    2.98    5.38
 -18 -17 -12   49.46    8.44
 -18 -17 -11   -0.48    8.15
 -18 -17 -10   33.99    9.91
 -18 -17  -3   15.61    7.36
 -18 -17  -2   27.52    5.88
 -18 -16 -10   74.56    8.72
 -18 -16  -9    3.11    7.47
 -18 -16  -8   -4.16    7.08
 -18 -16  -7   40.39    9.02
 -18 -16  -6   55.59    7.03
 -18 -16  -5   24.83    6.40
 -18 -16  -4   55.04    6.41
 -17 -22   4    3.25    4.84
 -17 -20   3    3.67    4.96
 -17 -17 -14   -8.69    9.22
 -17 -17   1   -6.68    4.64
 -17 -16 -14   39.72    7.69
 -17 -16 -13   -7.60    9.26
 -17 -16   0   63.52    5.61
 -17 -15 -12   48.43    7.61
 -17 -15 -11   43.63    9.54
 -17 -15  -2   80.65    5.54
 -17 -14 -10   40.85    7.79
 -17 -14  -9   37.48    6.86
 -17 -14  -8   76.57    9.01
 -17 -14  -7  -18.13    9.59
 -17 -14  -6   65.66    9.45
 -17 -14  -5   16.57    7.76
 -17 -14  -4   25.90    6.01
 -16 -23   6   -6.89    4.27
 -16 -20   5    7.73    3.45
 -16 -17   3    9.92    4.88
 -16 -16   2  218.45    6.50
 -16 -15 -15    5.40    7.83
 -16 -15   1   -9.47    5.31
 -16 -14 -14   18.96    7.45
 -16 -14 -13    0.59    8.78
 -16 -14   0  210.58    5.79
 -16 -13 -12   63.11    7.59
 -16 -13 -11   17.58    9.26
 -16 -13  -2   24.29    5.23
 -16 -12  -9   31.04    7.02
 -16 -12  -8   32.57    6.77
 -16 -12  -7   45.16    6.78
 -16 -12  -6   -2.27    6.36
 -16 -12  -5   12.65    6.25
 -15 -22   7    0.57    3.82
 -15 -19   6    7.45    3.24
 -15 -16   4   13.36    4.15
 -15 -15 -17    3.16    7.10
 -15 -15   3    6.78    4.72
 -15 -14 -16   13.17    7.29
 -15 -14   2   24.64    5.06
 -15 -13 -15   13.55    7.18
 -15 -13   1   49.64    4.17
 -15 -12 -13   13.21    7.09
 -15 -12  -1   30.22    6.34
 -15 -11 -11   33.30    6.86
 -15 -11 -10   21.30    9.34
 -15 -11  -3   13.45    5.33
 -14 -21   8   20.84    3.34
 -14 -14 -18    9.79    6.83
 -14 -14   4   81.17    3.65
 -14 -13 -17   -9.32    6.82
 -14 -13   3   26.21    3.26
 -14 -12 -16   34.73    7.27
 -14 -12   2   40.02    3.66
 -14 -11 -14    4.75    6.88
 -14 -11   0   98.61    5.80
 -14 -10 -12   13.33    6.35
 -14 -10  -2  142.78    7.00
 -14  -9  -9    7.80    6.01
 -14  -9  -8  341.34    7.70
 -14  -9  -7   18.40    5.40
 -14  -9  -6  300.25    7.28
 -14  -9  -5   27.52    5.38
 -13 -21   9    5.88    3.26
 -13 -18   8   65.90    3.42
 -13 -13 -18    2.85    8.65
 -13 -12 -17   -2.81    8.15
 -13 -11 -16   81.75    9.19
 -13 -10 -15    9.89    6.20
 -13 -10   1  105.67    4.16
 -13  -9 -13   50.43    6.43
 -13  -9  -1   55.41    4.56
 -13  -8 -10  310.95    7.34
 -13  -8  -9   13.26    5.37
 -13  -8  -8  227.75    8.02
 -13  -8  -6   24.96    6.66
 -13  -8  -5  119.92    6.96
 -13  -8  -4   -7.06    4.73
 -12 -18   9    9.37    2.44
 -12 -16   8   45.87    2.95
 -12 -13   6  371.27    4.15
 -12 -12 -19   -6.84    6.66
 -12 -12   5    6.32    3.19
 -12 -11 -18   12.54    6.82
 -12 -11   4  239.79    4.40
 -12 -10 -17   14.61    6.59
 -12  -9 -15   53.47    8.04
 -12  -8 -13   71.50    7.69
 -12  -7 -11   39.18    5.32
 -12  -7 -10  363.30    7.36
 -12  -7  -9   90.25    7.21
 -12  -7  -4   16.99    6.00
 -11 -21  11    4.30    2.16
 -11 -18  10   63.95    2.21
 -11 -16   9    5.75    2.29
 -11 -12 -20   24.27    8.09
 -11 -11 -19    8.60    7.25
 -11 -10 -18   -8.23    7.64
 -11  -9 -17   20.33    6.12
 -11  -9   3  272.76    4.56
 -11  -8 -15   70.63    8.71
 -11  -7 -13    1.20    7.21
 -11  -6 -11   33.48    4.99
 -11  -6 -10   65.11    5.22
 -11  -6  -4    6.32    6.27
 -11  -6  -3   38.95    4.26
 -10 -12 -21    7.11    9.18
 -10  -9 -18  -10.83    7.63
 -10  -8 -17   66.33    6.29
 -10  -7 -15   34.55    7.41
 -10  -6 -13   44.29    7.49
 -10  -5 -10   23.96    4.72
 -10  -5  -9   10.74    6.74
 -10  -5  -4  603.22    6.76
  -9 -23  13    4.88    1.45
  -9 -19  12   21.87    1.37
  -9  -8 -18    3.87    7.40
  -9  -7 -17   25.03    5.81
  -9  -6 -15   27.28    7.58
  -9  -5 -13  196.46    6.18
  -9  -5  -1  109.29    4.47
  -9  -4  -9  172.34    5.52
  -9  -4  -8  221.22    7.11
  -9  -4  -7  176.98    6.78
  -9  -4  -6  575.77    8.00
  -9  -4  -5    6.95    4.25
  -8 -20  13    2.06    0.95
  -8  -7 -18    5.88    7.72
  -8  -6 -17   -6.20    5.35
  -8  -6   3  170.14    2.39
  -8  -5 -15   -3.04    4.91
  -8  -4 -12    4.41    5.84
  -8  -3  -7   86.99    4.53
  -7  -7 -19   -8.83    6.64
  -7  -6 -18   23.78    5.44
  -7  -3 -12   60.89    4.57
  -7  -3 -11   50.81    5.73
  -7  -3  -2  561.48    4.77
  -6  -9 -22    3.01    7.61
  -6  -6 -19   -0.65    6.57
  -6  -4 -16    2.84    4.78
  -6  -3 -14  100.94    5.31
  -6  -3   0  747.99    4.32
  -6  -2 -10   75.92    4.27
  -6  -2  -4  234.15    3.84
  -5  -4 -17    0.33    5.82
  -4  -8 -23    8.66    5.54
  -4  -7 -22    1.45    5.96
  -4  -4 -18  201.46    7.08
  -4  -1 -11   22.23    3.50
  -4  -1  -3  116.89    2.80
  -3  -1 -13   36.90    3.84
  -3  -1  -1   55.51    2.35
  -2 -19  16   25.28    3.03
  -2 -16  15    3.57    2.39
  -2 -12  13   71.38    2.63
  -2  -9  11  241.30    2.74
  -2  -7 -23   -8.39    6.57
  -2  -6 -22   30.80    6.70
  -2  -4   6 2671.17    4.36
  -2  -3 -18   91.28    5.74
  -2  -1 -14  269.58    5.74
  -2   0  -3   -0.83    1.68
  -1 -15  15    3.31    2.63
  -1  -3 -19    6.50    4.25
   0 -20  17    3.90    3.39
   0  -9  12  159.31    3.52
   0  -7 -24    6.62    5.78
   0  -6 -23   12.04    5.24
   0  -4 -21    9.22    4.13
   0  -2 -18  108.24    5.79
   0  -1 -16   -0.16    4.22
   0   0 -14   86.44    3.58
   1 -19  17    1.66    4.13
   1 -16  16    5.39    3.80
   1 -10  13   44.76    3.83
   1  -3 -20   27.69    5.24
   1  -2   5  565.90    3.61
   1  -1 -17    2.69    3.31
   2 -18  17    1.18    4.57
   2 -15  16   17.00    4.28
   2 -13  15   86.94    4.70
   2  -5 -23    1.60    4.85
   2  -4 -22   -0.22    3.91
   3  -9  13   72.63    4.33
   3  -3 -21    5.06    4.64
   3  -2   6  313.29    4.10
   3  -1 -18   78.42    4.69
   4 -14  16    1.35    5.44
   4 -12  15   35.65    4.96
   5 -16  17    4.06    5.14
   5 -10  14   28.27    3.87
   5  -7  12  185.04    5.56
   5  -6  11   81.11    3.97
   5  -5  10  335.74    5.11
   5  -4   9   15.57    3.28
   5  -3   8  541.19    6.06
   5  -1   5   18.78    2.68
   5   1   1  480.04    3.66
   6 -19  18    8.31    5.28
   6 -16  17   21.17    4.43
   6  -7  12  227.40    5.19
   7 -13  16    2.27    6.52
   7 -11  15   20.91    5.76
   7  -8  13   12.62    5.31
   7  -2   7  165.82    4.32
   7   0   4   80.15    4.26
   7   2  -1   73.19    3.02
   8 -18  18   -0.61    6.25
   8 -15  17   -0.99    5.80
   8 -13  16   -0.84    5.07
   8 -11  15   59.39    4.84
   8  -8  13    3.38    4.44
   8   0   4   44.61    3.19
   8   1   2   39.06    2.89
   8   2  -1  396.53    3.71
   9 -18  18   11.43    6.39
   9 -15  17    5.39    6.21
   9 -13  16   51.41    5.76
   9 -11  15   30.27    5.26
   9  -2 -21   10.68    2.39
   9  -1   6  183.64    6.21
   9   1   2  308.35    4.27
   9   2 -13   55.32    1.03
  10 -15  17  -18.82    6.58
  10 -13  16   17.84    5.54
  10 -11  15   20.32    5.13
  10  -9  14  121.79    6.66
  10  -2 -21   18.62    2.53
  10  -1   6  608.91    7.56
  10   0 -18   97.70    2.17
  11 -15  17    1.52    7.35
  11 -13  16   89.86    6.33
  11 -11  15   -5.44    5.24
  11  -9  14   -8.76    5.86
  11  -2 -21   10.41    2.14
  11  -1   6   19.52    5.53
  11   1   2  566.30    5.98
  12 -15  17   17.01    7.82
  12 -13  16   32.75    5.97
  12  -8  13   70.78    5.57
  12  -2 -21    2.59    1.72
  12  -1   6  118.82    6.48
  12   0   4  180.00    5.00
  12   1   2  103.65    4.31
  13 -15  17    1.88    7.49
  13 -13  16   44.71    6.39
  13 -11  15    1.34    7.08
  13  -8  13   26.20    5.47
  13  -2   7  481.48    7.03
  13   0   4  101.89    4.84
  13   1   2  378.68    5.75
  13   2 -13   54.58    1.37
  13   2  -1  450.28    5.46
  14 -16  17    3.04    6.47
  14 -13  16    7.52    8.48
  14 -11  15  -12.86    7.10
  14  -8  13   18.86    6.91
  14  -7  12  117.47    6.53
  14  -2   7   97.84    5.19
  14   0   4  172.53    6.81
  14   2  -1  210.31    5.68
  15 -10  14   15.72    5.93
  15  -7  12   50.45    6.03
  15  -6  11   50.61    5.93
  15  -4   9   -5.47    4.91
  15  -3   8   30.84    4.83
  15  -2   7  306.54    7.75
  15   1   1   58.00    4.43
  15   2 -12   70.43    2.22
  15   2  -2    0.61    3.73
  16 -14  16   17.92    6.60
  16 -12  15    4.12    6.14
  16 -10  14   -3.14    7.40
  16  -6  11   36.11    5.97
  16  -5  10   47.24    5.85
  16  -4   9   47.86    5.29
  16  -3   8   92.25    6.78
  16  -1   5    4.63    4.69
  16   0   3    3.90    4.38
  16   1   1   31.22    5.53
  16   2 -11    8.16    2.46
  16   2  -3   55.47    4.05
  17 -14  16  -14.45    8.02
  17 -12  15   -1.66    8.46
  17  -9  13   13.87    6.32
  17  -2   6  132.60    5.71
  17   0   3    6.30    6.15
  17   1   0   -1.49    4.64
  17   2 -10   98.33    3.77
  17   2  -4   57.66    4.05
  18 -13  15    4.92    6.33
  18 -11  14   18.38    6.38
  18  -9  13   33.35    8.15
  18  -8  12   30.00    6.47
  18  -3   7   28.71    5.66
  18  -2   6  104.81    7.47
  18  -1   4  104.57    5.62
  18   0   2   23.06    5.32
  18   2  -8   10.09    4.15
  18   2  -7   76.07    4.97
  18   2  -6   78.02    5.16
  19 -13  15   -5.39    8.98
  19 -11  14   15.59    7.97
  19 -10  13   17.11    6.44
  19  -7  11   40.70    7.78
  19  -6  10   63.35    6.44
  19  -5   9   30.77    5.89
  19  -4   8   63.61    6.17
  19  -2   5  125.12    5.77
  19   1  -2   96.78    5.26
  20 -12  14   36.57    7.38
  20  -9  12   50.13    7.05
  20  -3   6   54.63    6.11
  20  -2   5   19.78    7.28
  20  -1   3  -15.07    7.01
  20   0   1    1.24    6.43
  20   1 -11   14.18    3.80
  20   1  -3   -3.40    4.26
  21 -11  13    1.61    6.66
  21  -8  11  -11.03    6.57
  21  -7  10   48.24    6.82
  21  -6   9    8.54    6.28
  21  -5   8   10.01    6.53
  21  -4   7   -2.84    5.88
  21  -2   4   44.98    6.27
  21  -1 -16   12.56    2.25
  21  -1   2   88.54    6.20
  21   0   0   21.41    6.47
  21   1  -9    4.16    4.19
  21   1  -8   23.65    4.72
  21   1  -7   -2.43    3.94
  21   1  -6   11.90    5.34
  21   1  -5    5.18    5.77
  22 -10  12   -4.37    6.93
  22  -3   5   39.62    6.38
  22  -2   3   11.93    5.78
  22  -1 -15   -0.51    2.40
  22  -1   1    4.47    5.68
  22   0 -12   10.17    3.56
  22   0  -2  111.89    6.08
  23 -11  12  -10.88    7.07
  23  -9  11    0.23    8.28
  23  -8  10   53.28    7.09
  23  -7   9   10.61    6.92
  23  -6   8   25.06    6.88
  23  -5   7    7.84    6.70
  23  -4   6   74.43    8.75
  23  -3   4   27.52    6.31
  23  -2   2   21.55    6.02
  23  -1 -14   12.39    2.89
  23  -1   0    4.99    5.64
  23   0 -10   29.76    4.83
  23   0  -9    1.21    3.83
  23   0  -5   -5.55    5.01
  23   0  -4   57.63    7.12
  24 -10  11  -18.87    7.01
  24  -9  10   29.58    7.30
  24  -5   6   21.87    7.39
  24  -4   5  -15.79    8.23
  24  -3   3    1.47    6.29
  24  -2   1   27.43    6.33
  24  -1 -12   33.01    3.51
  24  -1  -2   85.46    6.28
  24  -1  -1   -1.01    6.94
  25  -8   9   17.45    8.89
  25  -7   8   34.74    9.69
  25  -6   7    1.35    8.55
  25  -4   4   13.48    6.95
  25  -3   2   32.62    6.73
  25  -2   0   22.89    7.56
  25  -1 -10   24.11    5.34
  25  -1  -9   -4.01    3.93
  25  -1  -5    3.74    5.19
  25  -1  -4   49.38    6.97
  26  -8   8   -1.84    7.22
  26  -7   7    5.04    7.23
  26  -6   6   24.25    9.13
  26  -4   3    1.59    8.23
  26  -3   1    6.21    8.06
  26  -2  -2   27.53    6.58
  27  -7   6    3.89    7.50
  27  -6   5    3.42    9.14
  27  -5   3    2.06    7.01
  27  -4   2    5.15    8.59
  27  -3  -1   -0.28    6.64
  27  -2  -9    1.10    5.65
  27  -2  -8   23.31    6.17
  27  -2  -7    6.51    6.07
  27  -2  -6   -3.23    6.82
  27  -2  -5   18.23    7.95
  28  -6   4   -4.76    9.14
  28  -5   2   30.70    7.18
  28  -4   0  128.54    8.25
  28  -3  -4   -1.80    6.13
  28  -3  -3   -0.62    7.93
 -19 -22  -2   11.44    6.01
 -19 -21  -5   -2.87    8.13
 -19 -21  -4   20.25    8.15
 -19 -21  -3   -0.68    6.47
 -19 -20  -8    3.13    7.86
 -19 -20  -7   -2.57    6.95
 -19 -20  -6   41.18    7.25
 -19 -20  -5   18.84    7.00
 -18 -22   1    0.00    5.62
 -18 -20   0   70.84    5.85
 -18 -19  -1    6.49    5.79
 -18 -18 -11    0.04    7.93
 -18 -18 -10   12.74   10.27
 -18 -18  -3  -12.23    7.41
 -18 -18  -2   32.02    5.97
 -18 -17  -9   30.52    7.52
 -18 -17  -8   86.24    8.05
 -18 -17  -7    1.54    7.26
 -18 -17  -6   45.42    7.30
 -18 -17  -5   -3.73    6.15
 -18 -17  -4   14.88    6.25
 -17 -23   4   34.19    4.22
 -17 -21   3   -0.87    4.88
 -17 -19   2   38.11    4.43
 -17 -18   1   -0.71    4.55
 -17 -17 -13  -16.67    9.69
 -17 -17   0   15.70    5.27
 -17 -16 -12   10.46    7.89
 -17 -16 -11   11.70    9.19
 -17 -16  -2  100.78    7.15
 -17 -16  -1   -3.51    5.38
 -17 -15 -10    3.69    7.54
 -17 -15  -9  -18.26    9.05
 -17 -15  -8   16.61    8.76
 -17 -15  -5  -11.29    8.01
 -17 -15  -4   88.12    7.98
 -17 -15  -3    7.12    5.64
 -16 -22   5   12.66    4.56
 -16 -21   5    9.07    3.84
 -16 -19   4    7.73    3.84
 -16 -16 -15  -12.01    7.96
 -16 -15 -14   10.51    7.45
 -16 -15 -13    1.03    9.00
 -16 -15   0   21.21    5.61
 -16 -14 -12    7.86    7.30
 -16 -14  -1    5.89    4.53
 -16 -13 -10   78.33    7.44
 -16 -13  -9   25.73    8.76
 -16 -13  -8  140.71    9.41
 -16 -13  -5   29.42    7.70
 -16 -13  -4    7.20    7.26
 -16 -13  -3   -6.27    5.17
 -15 -23   7   -3.41    4.47
 -15 -20   6   59.86    4.31
 -15 -18   5    9.74    4.14
 -15 -15 -16   50.11    7.79
 -15 -14 -15   10.32    7.02
 -15 -13 -14    3.93    6.85
 -15 -13 -13   28.09    8.35
 -15 -13   0   21.54    5.77
 -15 -12 -12   93.65    7.77
 -15 -12 -11  133.51   10.30
 -15 -12  -2   92.12    7.59
 -15 -11  -9   73.26    7.02
 -15 -11  -8   -7.41    6.25
 -15 -11  -7  102.79    7.17
 -15 -11  -6   15.53    5.53
 -15 -11  -5   45.55    6.04
 -15 -11  -4  150.85    6.54
 -14 -22   8    3.50    3.39
 -14 -19   7   20.51    3.53
 -14 -17   6   56.48    3.34
 -14 -14 -17    4.81    6.97
 -14 -13 -16   18.05    6.84
 -14 -12 -15   25.16    7.08
 -14 -12 -14   45.34    8.48
 -14 -12   1  194.03    6.22
 -14 -11 -13    8.79    6.51
 -14 -10 -11   -1.15    6.27
 -14 -10 -10   43.74    6.38
 -14 -10  -4   29.08    7.21
 -14 -10  -3   11.06    5.23
 -13 -15   6    9.79    3.49
 -13 -14   5    2.14    3.46
 -13 -12   3  100.05    4.31
 -13 -11 -15   -0.59    8.28
 -13 -11   2   66.24    3.57
 -13 -10 -14   35.26    6.49
 -13 -10 -13   13.79    7.86
 -13 -10   0  205.38    5.95
 -13  -9 -12    9.90    6.06
 -13  -9 -11   25.99    7.81
 -13  -9  -2  732.98    7.98
 -13  -8  -7   66.29    5.60
 -12 -21  10    2.10    2.60
 -12 -13 -19   25.90    6.92
 -12 -12 -18   11.69    6.62
 -12 -11 -17    2.14    6.72
 -12 -10 -16   55.74    6.78
 -12  -9 -14   10.23    6.00
 -12  -9   1  397.53    5.32
 -12  -8 -12   47.86    5.41
 -12  -8  -1  291.30    5.54
 -12  -7  -8  102.15    5.74
 -12  -7  -7   74.02    5.40
 -12  -7  -6  149.02    5.72
 -12  -7  -5  245.08    6.05
 -11 -13 -20   13.48    8.53
 -11 -13   7   32.28    2.48
 -11 -12   6  422.76    4.42
 -11 -10 -17   -4.06    7.61
 -11 -10   4  212.27    4.15
 -11  -9 -16   25.79    6.18
 -11  -8 -14   69.90    7.69
 -11  -8   1  710.70    6.67
 -11  -7 -12   21.38    5.35
 -11  -7  -1   28.55    3.73
 -11  -6  -9   16.76    4.97
 -11  -6  -8  113.59    5.55
 -11  -6  -7   -5.59    4.79
 -11  -6  -6   56.96    4.92
 -11  -6  -5   36.42    4.73
 -10 -22  12   -3.78    1.77
 -10 -13   8  196.33    2.70
 -10 -11 -20    2.88    6.33
 -10 -10 -19   -0.82    6.02
 -10  -8 -16   11.08    7.40
 -10  -8   3  119.02    2.95
 -10  -7   1  162.35    4.06
 -10  -6 -12   99.51    6.95
 -10  -6  -1   94.92    3.93
 -10  -5  -8  158.85    5.54
 -10  -5  -7   39.37    4.84
 -10  -5  -6  565.38    7.15
 -10  -5  -5   68.56    4.73
  -9 -13   9   25.24    1.59
  -9 -11 -21   31.11    6.14
  -9 -10 -20   -1.01    5.98
  -9  -9 -19   -4.81    5.78
  -9  -7 -16  100.39    7.58
  -9  -7   3    8.89    1.99
  -9  -6 -14   40.60    7.20
  -9  -6   1    9.94    3.09
  -9  -5 -12  203.30    6.11
  -8  -9 -20    5.95    6.01
  -8  -8 -19    2.17    5.54
  -8  -6 -16   45.90    5.62
  -8  -5 -14   71.82    5.58
  -8  -5   1   94.56    2.50
  -8  -4 -11   95.72    6.55
  -8  -4  -2   30.42    2.96
  -7 -12  10  247.79    1.25
  -7 -10 -22   17.51    6.65
  -7  -9 -21   13.04    6.07
  -7  -6   4    4.92    1.73
  -7  -5 -16   38.10    5.11
  -7  -4 -14   18.05    4.95
  -7  -3 -10   29.37    5.60
  -7  -3  -3   28.43    2.98
  -6  -5 -17   15.72    5.14
  -6  -4 -15   13.73    6.71
  -6  -4   2  595.64    3.30
  -6  -3 -13   82.11    5.06
  -6  -2  -9   -0.23    3.74
  -6  -2  -8   33.73    4.00
  -6  -2  -7   41.41    4.99
  -6  -2  -6  250.75    5.19
  -6  -2  -5  111.19    3.45
  -5 -20  15    3.46    1.46
  -5 -17  14   45.60    1.63
  -5  -5 -18  129.01    6.60
  -4  -9 -23    7.03    6.94
  -4  -9  10   13.18    1.13
  -4  -5 -19    7.10    4.84
  -4  -3 -16   43.50    4.70
  -4  -1 -10    9.79    3.41
  -3 -11  12   51.24    1.92
  -3  -7 -22   72.80    7.52
  -3  -6 -21   20.05    5.22
  -3  -5 -20   28.44    5.38
  -3  -3 -17   -1.00    4.02
  -3  -2 -15   11.22    4.04
  -3  -1 -12  129.11    5.02
  -2  -2 -16   63.26    4.27
  -2   0 -10    9.28    2.51
  -1 -21  17   -0.21    3.18
  -1 -11  13   52.39    2.81
  -1  -7 -23    4.90    5.95
  -1  -7  10    2.70    2.13
  -1  -6   9   13.32    1.88
  -1  -5 -21   -2.27    5.60
  -1  -4 -20    8.84    4.52
  -1  -2 -17   14.25    3.69
  -1   0 -12 1088.34    6.94
   0 -14  15    2.30    3.23
   0 -12  14   73.47    3.70
   0  -3 -19   -4.92    5.01
   0  -3   6  202.55    2.42
   0   0 -13   -6.15    3.63
   0   1  -8 1904.94    6.70
   1   1 -11   -2.17    2.07
   2  -3   7   18.74    2.00
   2  -1 -17    4.25    4.10
   2  -1   4 1073.63    4.82
   2   0 -15   -4.18    3.67
   3 -20  18    7.07    4.51
   3 -17  17   -4.82    3.41
   3 -14  16    7.26    4.54
   3 -12  15    3.87    4.44
   3  -6 -24   14.99    3.91
   3   1   0  359.70    2.56
   3   2  -7   20.38    0.99
   4 -16  17   11.23    5.35
   4 -10  14  280.48    5.17
   4  -6  11    4.32    3.26
   4  -5  10  967.40    6.83
   4  -4   9    2.22    2.48
   4  -3 -21   11.35    4.59
   4  -1   5   62.46    2.72
   4   0   3    1.53    2.36
   4   2 -10   48.20    1.60
   5 -19  18    0.52    4.05
   5 -13  16   10.00    5.31
   5  -8  13   38.75    4.93
   5  -2 -20    4.72    3.54
   5   2 -11   20.37    1.36
   5   2  -2  180.60    2.26
   6 -18  18   -0.57    6.18
   6 -15  17   21.69    5.59
   6 -13  16   11.01    4.52
   6 -11  15   16.92    4.55
   6  -8  13  223.02    5.27
   6   0   4  412.59    5.12
   6   1 -15   71.66    2.35
   7 -18  18   14.47    4.91
   7 -15  17   20.24    4.67
   7  -9  14   55.97    5.97
   7  -4 -23   -0.46    3.55
   7  -1   6    5.51    4.32
   7   1   2  663.51    4.92
   8 -17  18   26.58    6.16
   8  -9  14   56.95    4.68
   8  -5  11  245.59    6.56
   8  -4  10  227.30    6.04
   8  -1   6  239.63    4.73
   9 -17  18   11.67    7.05
   9 -12  16   29.39    6.86
   9  -9  14   16.96    4.64
   9  -6  12   16.58    6.15
   9  -5  11   94.83    4.99
   9  -4  10   14.84    4.13
   9  -3   9   60.84    5.94
   9   2   0   87.38    3.84
   9   3  -7  246.90    2.34
  10 -17  18   -3.49    6.51
  10 -12  16   45.00    8.27
  10  -6  12   79.55    7.10
  10  -5  11   12.39    4.80
  10  -4  10   81.22    4.63
  10  -3   9  174.97    6.28
  10   2   0   85.46    3.27
  10   3  -8   89.04    1.83
  10   3  -7   64.77    1.96
  10   3  -6  178.33    2.77
  11 -14  17    9.46    7.17
  11 -12  16   58.24    8.32
  11  -6  12   93.86    7.01
  11  -5  11   33.48    5.19
  11  -4  10   32.89    4.44
  11  -3   9   48.91    5.91
  11   2   0  111.71    3.85
  11   3  -8  391.08    3.07
  11   3  -7  310.27    3.10
  11   3  -6  484.93    3.96
  11   3  -5  293.59    3.80
  12 -12  16   83.81    7.97
  12  -9  14    7.20    5.30
  12  -6  12    3.00    7.21
  12  -5  11   25.91    4.94
  12  -4  10   81.67    5.19
  12  -3 -22    7.60    2.32
  12  -3   9   61.92    6.13
  12   2   0  456.45    5.38
  12   3  -8  302.05    3.09
  12   3  -7   28.50    2.37
  12   3  -6  221.66    3.62
  13 -12  16   14.71    7.66
  13  -9  14   20.27    5.54
  13  -6  12  327.34    8.79
  13  -4  10  104.59    6.73
  13  -3 -22    6.45    1.72
  13  -3   9   74.78    6.37
  13  -1   6   41.23    4.57
  13   2   0  620.97    7.02
  14 -15  17   11.20    6.52
  14  -9  14   29.53    5.96
  14  -5  11   45.51    7.47
  14  -4  10  150.58    7.01
  14  -1   6   68.40    4.92
  14   1   2   48.67    4.31
  15 -15  17   -5.10    7.76
  15 -13  16   27.06    6.36
  15 -11  15   19.06    6.50
  15  -9  14    7.26    7.28
  15  -8  13    9.07    5.61
  15  -1   6   -5.29    5.95
  15   0   4   22.44    4.79
  15   1   2  171.88    5.20
  15   2  -1   75.31    4.31
  16 -13  16   -6.91    7.79
  16 -11  15    3.62    7.71
  16  -8  13  -10.41    5.88
  16  -2   7   38.54    4.81
  16   0   4  247.98    7.10
  16   1 -15    9.63    1.41
  16   2  -2   87.07    4.40
  17 -10  14    6.37    6.31
  17  -7  12   59.80    6.31
  17  -6  11   29.42    5.80
  17  -5  10   15.33    5.78
  17  -4   9   11.01    5.45
  17  -3   8   45.59    5.21
  17  -1   5   25.66    4.83
  17   1   1    1.99    4.85
  17   2 -11    1.98    2.56
  17   2  -3   59.11    4.35
  18 -12  15    2.84    6.48
  18 -10  14  -13.22    7.65
  18  -6  11   13.95    8.27
  18  -5  10   55.84    7.62
  18  -4   9  -15.29    6.99
  18  -1   5   56.92    6.87
  18   0   3    6.37    6.85
  18   1   0    8.37    4.83
  18   2  -9   52.86    4.00
  18   2  -5   45.53    3.89
  18   2  -4   99.65    5.49
  19 -12  15   11.21    7.84
  19  -9  13    3.99    7.88
  19  -8  12   17.30    6.65
  19  -3   7   81.18    6.14
  19  -2   6   -6.37    7.09
  19  -1   4  155.08    6.19
  19   0   2   41.73    5.48
  19   1 -13   23.10    2.51
  19   1  -1   22.60    4.93
  20 -11  14   41.91    8.71
  20  -8  12   15.87    8.16
  20  -7  11   10.03    6.56
  20  -6  10   -3.55    5.92
  20  -5   9   15.63    5.95
  20  -4   8   53.15    6.25
  20  -3   7   38.04    7.68
  20  -1 -17    3.01    1.53
  20   0 -15   -3.42    2.26
  20   1 -12   33.27    3.18
  20   1  -2   53.86    5.01
  21 -12  14   19.72    7.83
  21 -10  13    8.19    8.45
  21  -9  12   11.52    6.75
  21  -3   6   20.24    6.11
  21  -2   5   11.06    7.19
  21  -1   3   -0.12    7.18
  21   0 -14    2.19    2.54
  21   1 -10   -4.69    3.67
  21   1  -4   44.27    4.55
  21   1  -3   13.33    6.38
  22 -11  13   -7.12    7.18
  22  -9  12   73.95    9.25
  22  -8  11   36.04    6.80
  22  -7  10   21.10    6.93
  22  -6   9    5.59    6.17
  22  -5   8   56.29    7.02
  22  -4   7    2.36    6.13
  22  -2   4   20.83    6.41
  22  -1   2   56.10    5.92
  22   0 -13   -2.41    3.08
  22   0  -1    2.16    5.17
  22   1  -7   10.72    5.17
  22   1  -6   72.46    6.01
  23 -10  12   45.47    7.59
  23  -3   5   24.07    7.84
  23  -2   3   19.65    6.21
  23  -1   1   20.54    5.65
  23   0 -11    3.97    3.88
  23   0  -3   -3.67    5.45
  23   0  -2  120.00    7.21
  24  -9  11   17.50    9.30
  24  -8  10   12.19    7.12
  24  -7   9   12.12    6.82
  24  -6   8   47.21    7.26
  24  -5   7   46.35    8.68
  24  -3   4   18.22    6.76
  24  -2   2   46.46    6.53
  24  -1 -13    1.32    3.28
  24  -1   0  145.79    9.12
  24   0  -9   13.59    4.69
  24   0  -8   14.49    5.25
  24   0  -7    4.67    5.38
  24   0  -6   94.55    6.43
  24   0  -5   -8.57    6.17
  25  -9  10    5.03    7.47
  25  -5   6   50.49    7.37
  25  -4   5   -5.83    9.80
  25  -3   3   32.01    6.84
  25  -2   1    9.44    6.51
  25  -1 -11    6.67    4.13
  25  -1  -3   10.11    5.73
  25  -1  -2  106.46    8.13
  26  -8   9    2.76    8.91
  26  -7   8   20.97    9.10
  26  -5   5    1.64    7.16
  26  -4   4   23.73    8.62
  26  -3   2   -3.47    8.39
  26  -2  -1    6.19    6.00
  26  -2   0  103.43    8.82
  26  -1  -8   15.40    5.35
  26  -1  -7   -9.05    5.44
  26  -1  -6   14.16    6.36
  26  -1  -5   10.24    6.87
  27  -7   7   20.78    8.99
  27  -6   6   24.52    9.18
  27  -5   4    6.96    7.38
  27  -4   3    7.53    8.54
  27  -3   0   59.30    7.18
  27  -3   1    3.14    8.20
  27  -2  -4    2.05    6.21
  27  -2  -3    0.97    6.55
  28  -6   5   17.04    9.08
  28  -5   3   -0.27    7.31
  28  -4   1    9.31    6.72
  28  -3  -2   -5.57    6.76
  28  -3  -1    8.85    8.29
 -18 -22   0  115.39    7.25
 -18 -21  -1   -2.36    6.81
 -18 -21   0   -1.34    5.30
 -18 -20  -2   38.37    7.47
 -18 -20  -1    9.87    5.72
 -18 -19 -11    7.64    8.46
 -18 -19 -10   32.25    9.05
 -18 -19  -9   -7.66   10.43
 -18 -19  -4  -11.45    8.03
 -18 -19  -3    8.52    7.63
 -18 -19  -2   -6.07    5.75
 -18 -18  -9    1.00    7.04
 -18 -18  -8   14.12    7.48
 -18 -18  -7   -0.27    6.79
 -18 -18  -6   30.21    7.01
 -18 -18  -5   -4.76    6.67
 -18 -18  -4   25.26    6.30
 -17 -23   3   13.44    5.40
 -17 -22   3   -1.23    4.19
 -17 -21   2   88.99    6.04
 -17 -20   2    6.40    4.19
 -17 -19   1   13.16    4.44
 -17 -18 -13    3.36    8.00
 -17 -18 -12   51.11   10.55
 -17 -18   0  112.31    5.87
 -17 -17 -12   83.52    8.68
 -17 -17 -11   -5.87    9.46
 -17 -17  -2   87.14    7.34
 -17 -17  -1    0.53    5.27
 -17 -16 -10   39.54    7.99
 -17 -16  -9   14.57    9.35
 -17 -16  -8   75.17    9.64
 -17 -16  -4   25.13    8.44
 -17 -16  -3   -3.78    5.76
 -17 -15  -7   39.02    7.12
 -17 -15  -6   -6.74    6.48
 -16 -23   5    2.79    4.39
 -16 -20   4   37.75    3.94
 -16 -17 -15    5.56    7.92
 -16 -17 -14   38.40    9.56
 -16 -17   2   88.22    4.88
 -16 -16 -14   13.38    7.65
 -16 -16   1    7.14    4.52
 -16 -15 -12   34.57    7.52
 -16 -15  -1    5.29    6.38
 -16 -14 -11   -5.23    7.32
 -16 -14 -10  -12.55    7.18
 -16 -14  -9    5.37    8.46
 -16 -14  -3    3.33    6.94
 -16 -14  -2   49.34    5.57
 -16 -13  -7  -12.11    6.24
 -16 -13  -6   78.12    6.90
 -15 -21   6    6.28    4.40
 -15 -19   5   33.80    4.55
 -15 -17   4  111.91    4.31
 -15 -16 -16    4.98    7.06
 -15 -16   3   -0.33    4.57
 -15 -15 -15   -0.01    7.08
 -15 -15   2   67.48    5.19
 -15 -14 -14   15.26    6.76
 -15 -14 -13    8.61    8.77
 -15 -14   1   10.70    3.89
 -15 -13 -12   37.07    7.52
 -15 -13  -1   66.72    6.89
 -15 -12 -10   99.79    7.63
 -15 -12  -9   25.48    8.41
 -15 -12  -4   -4.86    7.34
 -15 -12  -3  118.28    5.98
 -14 -23   8    2.41    3.61
 -14 -20   7    5.07    3.53
 -14 -18   6   29.45    3.80
 -14 -16   5    3.54    3.02
 -14 -15 -17  -14.51    6.88
 -14 -15   4   58.61    4.49
 -14 -14 -16    3.83    7.02
 -14 -13 -15   -7.07    6.64
 -14 -13   2   18.44    3.44
 -14 -12 -13   26.83    8.11
 -14 -11 -12   10.95    6.60
 -14 -11 -11   10.01    8.10
 -14 -11  -2   68.41    6.70
 -14 -11  -1  140.94    5.37
 -14 -10  -9   10.01    6.14
 -14 -10  -8    6.17    5.41
 -14 -10  -7    3.23    5.24
 -14 -10  -6   66.52    5.92
 -14 -10  -5   35.36    5.60
 -13 -22   9    5.11    3.34
 -13 -19   8   39.17    3.28
 -13 -17   7    2.57    3.05
 -13 -15 -18   15.86    8.57
 -13 -14 -18   12.37    6.83
 -13 -13 -17  -10.97    6.69
 -13 -13   4  104.42    3.51
 -13 -12 -16   14.98    6.87
 -13 -11 -14   56.32    6.56
 -13 -10 -12   47.15    8.18
 -13  -9 -10   -1.36    5.43
 -13  -9  -9   31.56    6.10
 -13  -9  -8  123.90    7.79
 -13  -9  -4  149.00    7.37
 -13  -9  -3  101.36    5.15
 -12 -22  10    4.00    2.97
 -12 -15   7   35.06    3.27
 -12 -14 -19    9.56    7.03
 -12 -13 -18   14.80    8.63
 -12 -12 -17  -17.27    8.89
 -12 -11 -16   57.67    6.60
 -12 -10 -15   28.96    6.27
 -12 -10   2   94.78    3.63
 -12  -9 -13  112.20    6.59
 -12  -9   0   60.11    5.22
 -12  -8 -11  129.12    6.25
 -12  -8 -10   17.82    6.70
 -12  -8  -3  248.89    7.01
 -12  -8  -2  399.48    6.18
 -11 -22  11    6.68    2.32
 -11 -12 -19    2.36    6.75
 -11 -11 -18    9.46    6.32
 -11 -11   5    5.83    2.11
 -11  -9 -15   29.65    6.38
 -11  -8 -13  114.02    8.00
 -11  -7 -11   62.13    5.51
 -11  -7 -10  130.57    7.33
 -11  -7  -2  775.91    7.22
 -10 -12 -20   12.73    6.67
 -10 -11 -19   -0.38    5.88
 -10 -10 -18   35.47    6.36
 -10  -9 -17    3.26    5.95
 -10  -9   4   56.48    2.82
 -10  -8 -15    5.33    7.18
 -10  -7 -14   81.27    5.71
 -10  -6 -11   26.78    5.05
 -10  -6  -2  394.45    5.53
  -9 -12 -21    4.04    6.18
  -9 -11 -20   42.42    7.86
  -9 -10 -19    8.40    7.91
  -9  -9 -18   44.14    7.83
  -9  -8 -17   12.14    5.65
  -9  -7 -15   26.02    7.06
  -9  -6 -13   28.01    6.66
  -9  -5 -11   74.95    5.10
  -9  -5 -10   19.62    6.02
  -9  -5  -2  134.14    4.22
  -8 -15  11    2.96    1.08
  -8 -11 -21    0.77    7.33
  -8 -10 -20   46.74    7.69
  -8  -9 -19    2.39    7.27
  -8  -8 -18   26.20    7.19
  -8  -7 -17    8.60    5.40
  -8  -7   4   46.89    2.20
  -8  -6 -15   44.59    7.38
  -8  -5 -13   43.31    6.52
  -8  -4 -10  229.14    5.64
  -8  -4  -3   65.00    4.51
  -7 -11 -22    5.60    6.50
  -7 -10 -21    5.83    7.29
  -7  -9 -20   34.04    7.21
  -7  -8 -19   14.92    7.04
  -7  -7 -18  101.86    7.32
  -7  -6 -17   31.96    5.40
  -7  -5 -15   26.46    5.01
  -7  -4 -13   76.69    5.27
  -7  -4   0   14.25    2.20
  -7  -3  -9   27.76    4.28
  -7  -3  -8   73.00    5.78
  -7  -3  -5  389.30    5.84
  -7  -3  -4  323.42    4.49
  -6  -8 -20   32.37    7.00
  -6  -7 -19   13.44    6.85
  -6  -6 -18   80.93    5.90
  -6  -3 -12  111.64    4.69
  -6  -3  -1  163.78    3.82
  -5 -10 -23    3.26    6.12
  -5  -9 -22    2.92    5.97
  -5  -8 -21    4.51    6.95
  -5  -6 -19   13.87    4.87
  -5  -3 -14  145.01    5.53
  -5  -3   1   12.44    2.14
  -5  -2 -11   20.15    3.80
  -5  -2  -2  186.27    3.12
  -4 -18  15    8.48    2.03
  -4  -8 -22   11.87    5.95
  -4  -4 -17   -7.06    4.33
  -4  -3 -15   30.90    6.27
  -4  -2   0   69.82    2.54
  -4  -1  -9  408.69    4.87
  -4  -1  -8  389.14    4.61
  -4  -1  -5   75.60    3.84
  -4  -1  -4 1855.97    6.91
  -3 -20  16    9.26    2.47
  -2 -10  12   24.08    2.00
  -2  -8 -23    3.05    7.27
  -2  -7 -22    5.63    6.47
  -2  -5 -20   17.53    6.20
  -2   0  -9    4.94    2.33
  -2   0  -4   91.35    2.26
  -1 -17  16   71.02    3.23
  -1  -8  11  151.26    2.73
  -1  -6 -22   17.53    4.76
  -1  -5   8 1108.48    4.38
  -1  -3 -18   78.81    6.05
  -1   0 -11    0.26    3.66
   0 -19  17    1.82    3.26
   0 -16  16   81.73    4.07
   0  -4 -20   63.00    5.69
   0   1  -6 1036.04    4.16
   1 -18  17   15.78    3.87
   1 -15  16   35.71    4.06
   1 -11  14   83.05    4.10
   1  -7  11   12.35    2.40
   1  -4   8  270.27    3.48
   1  -2 -18    5.52    3.83
   1  -1 -16   32.79    4.47
   1   0 -14 1029.01    6.83
   2 -17  17   -5.42    4.04
   2  -9  13   88.72    4.35
   2  -4 -21    1.82    4.81
   2   0   2 1809.98    4.66
   3 -16  17    2.32    4.45
   3 -10  14   18.43    4.68
   3  -6  11   24.94    3.89
   3  -5  10   90.12    4.45
   3  -2 -19    7.41    4.25
   4 -19  18   10.53    4.12
   4 -13  16   10.12    4.93
   4  -7  12  271.90    4.89
   4  -5 -23   -1.61    4.60
   4  -4 -22   21.96    4.41
   4  -3   8 1831.50    8.03
   4  -1 -18   91.70    3.60
   4   1   1  598.26    4.07
   4   2  -3  287.59    1.59
   5 -18  18    3.93    5.02
   5 -15  17   11.65    5.39
   5 -11  15   -1.61    4.12
   5  -3 -21   16.19    4.05
   5  -2   7  236.62    3.81
   6  -9  14   55.87    4.27
   6  -2 -20   43.17    3.69
   6  -1   6  690.15    6.44
   6   1   2   49.93    2.75
   6   2  -1  155.08    2.41
   7 -17  18   13.87    6.02
   7 -14  17   -2.44    5.76
   7 -12  16   12.28    6.20
   7  -6  12  266.52    6.94
   7  -5  11   11.95    3.99
   7  -4  10  576.47    6.40
   7  -3   9   36.86    4.89
   7   1 -15   10.83    2.01
   8 -14  17   16.86    5.95
   8 -12  16   17.10    5.00
   8 -10  15   -4.06    5.48
   8  -7  13    2.84    5.77
   8  -6  12   53.13    4.65
   8  -1 -19   22.39    2.92
   8   2   0 1032.17    5.60
   9 -16  18   -7.69    6.22
   9 -14  17    9.36    5.14
   9 -10  15   14.47    4.47
   9  -7  13  138.52    5.70
   9  -2   8  267.79    5.37
   9   0   5    4.28    3.83
   9   1   3   41.90    3.80
   9   3  -8  280.22    2.02
   9   3  -6  232.19    2.23
   9   3  -5   65.73    2.30
  10 -16  18   35.66    6.67
  10 -10  15    1.24    5.10
  10  -7  13   64.49    5.40
  10  -3 -22   -1.16    2.42
  10  -2   8   64.35    4.56
  10   0   5    0.14    3.39
  10   1   3  423.59    5.50
  10   3  -5  489.39    3.71
  10   3  -4  697.87    4.97
  11 -16  18   20.59    8.03
  11 -10  15   -3.99    5.62
  11  -7  13   21.46    5.18
  11  -3 -22   -3.92    2.36
  11  -2   8   57.34    4.62
  11   0   5    4.81    4.02
  11   1   3  142.82    4.62
  11   3  -4  553.85    4.81
  12 -16  18   32.37    8.47
  12 -14  17    4.83    6.35
  12 -10  15   20.29    5.35
  12  -7  13   -1.06    5.16
  12  -2   8  -12.15    4.21
  12   0   5    2.29    4.11
  12   1   3  150.95    4.74
  12   3  -5  138.00    2.96
  12   3  -4  298.52    4.75
  13 -14  17   -2.51    6.42
  13 -10  15    4.79    5.92
  13  -7  13   13.09    5.68
  13  -2   8  244.15    5.98
  13   0   5   -1.62    4.28
  13   1   3  134.44    4.73
  13   3  -8  116.69    2.81
  13   3  -7    7.21    1.87
  13   3  -6   10.85    2.21
  13   3  -5  120.43    3.75
  14 -14  17   -3.30    6.40
  14 -12  16   38.50    6.22
  14 -10  15    7.97    5.53
  14  -7  13   32.22    7.10
  14  -6  12    1.63    5.66
  14  -3   9   19.65    4.70
  14  -2   8   68.14    6.89
  14   0   5   -0.50    6.30
  14   1   3   48.44    6.15
  14   2 -13   17.67    1.34
  14   2   0  800.89    7.25
  14   3  -7  157.25    3.80
  14   3  -6  170.89    4.23
  14   3  -5  367.82    5.13
  15 -14  17  -18.62    7.90
  15 -12  16    4.86    6.50
  15 -10  15   11.20    7.22
  15  -6  12   39.93    6.04
  15  -5  11   81.80    6.14
  15  -4  10  209.03    6.43
  15  -3   9   50.28    5.19
  15   2   0   -7.53    5.51
  16 -12  16   20.39    7.84
  16  -9  14   21.98    6.19
  16  -6  12   16.19    7.33
  16  -5  11   52.13    7.90
  16  -4  10   45.17    7.19
  16  -1   6   68.27    5.26
  16   1   2   53.66    4.68
  16   2 -12    4.91    1.99
  16   2  -1   44.60    4.30
  17 -13  16   15.41    6.80
  17 -11  15    3.46    6.35
  17  -9  14   -8.56    7.86
  17  -8  13    9.94    5.99
  17  -2   7   52.03    5.21
  17   0   4  118.94    5.71
  17   1   2  133.42    7.19
  17   2  -2    4.50    4.26
  18 -13  16   31.32    8.27
  18 -11  15   -1.31    7.71
  18  -8  13   19.45    8.07
  18  -7  12   14.13    5.89
  18  -3   8  119.67    6.58
  18  -2   7   90.77    7.46
  18   1 -14   11.86    1.87
  18   1   1   12.80    4.93
  18   2 -10    7.76    2.54
  18   2  -3    7.80    4.11
  18   2  -2   27.68    5.89
  19 -10  14   49.21    6.70
  19  -7  12   22.74    8.14
  19  -6  11   13.78    6.62
  19  -5  10   -9.25    6.16
  19  -4   9   24.40    5.92
  19  -3   8    7.26    7.80
  19  -1   5   20.37    6.56
  19   0   3   -1.37    5.19
  19   1   0    2.01    4.89
  19   2  -9   21.47    4.03
  19   2  -8   98.95    4.13
  19   2  -7   67.10    3.85
  19   2  -6   32.14    3.77
  19   2  -5  121.10    4.63
  19   2  -4   36.84    5.27
  20 -12  15   -8.42    8.28
  20  -9  13   -9.08    6.78
  20  -2   6   63.15    6.38
  20  -1   4   66.50    6.32
  20   0   2   76.40    5.80
  20   1  -1   32.34    4.94
  21 -11  14   20.93    7.32
  21  -8  12   47.96    6.92
  21  -7  11   -8.30    6.61
  21  -6  10   40.05    6.36
  21  -5   9    7.42    6.42
  21  -4   8   88.24    7.11
  21  -3   7   10.81    7.82
  21  -1   4   48.98    7.49
  21   0   1   -6.20    5.51
  21   1 -11    4.88    3.48
  21   1  -2   91.37    5.39
  22 -10  13   15.39    7.28
  22  -7  11   -3.95    8.09
  22  -6  10   -4.82    8.01
  22  -5   9  -16.02    7.97
  22  -3   6   86.02    7.35
  22  -2   5    1.24    8.47
  22  -1   3   27.20    7.31
  22   0   0  122.72    6.40
  22   1  -9    7.86    4.23
  22   1  -8   21.13    3.98
  22   1  -5    7.02    4.76
  22   1  -4   86.52    5.54
  22   1  -3    5.02    6.30
  23  -9  12  -12.62    8.73
  23  -8  11    4.15    6.96
  23  -7  10   44.07    6.81
  23  -6   9    6.38    6.16
  23  -5   8   79.23    7.34
  23  -4   7   -6.18    6.62
  23  -2   4   23.24    6.24
  23  -1 -15    7.84    2.74
  23  -1   2  171.87    7.48
  23   0 -12   42.85    4.17
  23   0  -1    3.61    5.45
  24  -6   9   -1.48    8.25
  24  -4   6   72.44    7.55
  24  -3   5    0.81    8.17
  24  -2   3   33.34    6.56
  24  -1   1   22.88    7.59
  24   0 -10   36.80    4.53
  24   0  -4  294.52    7.68
  24   0  -3    5.93    5.55
  25  -8  10    0.12    7.52
  25  -7   9   -0.56    7.06
  25  -6   8   18.01    7.19
  25  -5   7   32.68    8.65
  25  -3   4   65.56    7.23
  25  -2   2   -1.91    6.28
  25  -1 -12   14.58    3.95
  25  -1  -1    8.66    6.02
  26  -6   7   25.23    7.61
  26  -5   6    0.03    7.63
  26  -4   5   32.11    8.89
  26  -3   3   -2.44    8.03
  26  -2   1    8.31    8.52
  26  -1 -10   18.49    4.69
  26  -1  -9    2.99    4.26
  26  -1  -4   -1.30    6.13
  26  -1  -3  -15.86    6.21
  27  -5   5    8.52    7.37
  27  -4   4   16.65    8.76
  27  -3   2   69.80    9.15
  27  -2  -2   13.47    6.25
  27  -2  -1    0.36    8.35
  28  -5   4   19.78    8.06
  28  -4   2   70.75    7.85
  28  -3   0    2.89    7.15
  28  -2  -6   -2.09    5.90
  28  -2  -5   18.33    6.16
  28  -2  -4   42.52    7.75
 -18 -23   0    3.27    3.71
 -18 -22  -1    2.14    4.17
 -18 -21  -3   13.54    7.56
 -18 -21  -2    6.31    6.16
 -18 -20  -9    1.47    7.47
 -18 -20  -8   12.53    9.18
 -18 -20  -7   -0.28    8.72
 -18 -20  -6    4.49    8.40
 -18 -20  -5   -3.58    8.30
 -18 -20  -4   18.63    8.16
 -18 -20  -3    6.83    6.26
 -18 -19  -8   11.57    7.38
 -18 -19  -7   -7.02    7.11
 -18 -19  -6    4.31    6.88
 -18 -19  -5    1.06    6.70
 -17 -22   2   -4.68    5.27
 -17 -20   1    7.56    4.63
 -17 -19 -12   -1.35    9.98
 -17 -19   0   21.71    5.17
 -17 -18 -11  -17.76    7.97
 -17 -18 -10   33.99   10.10
 -17 -18  -1    4.05    5.39
 -17 -17 -10   91.84    8.59
 -17 -17  -9    5.63    7.25
 -17 -17  -8   29.40    9.46
 -17 -17  -4  133.14    8.53
 -17 -17  -3   -6.11    5.86
 -17 -16  -7   -5.85    6.64
 -17 -16  -6  115.18    7.57
 -17 -16  -5   11.30    6.23
 -16 -21   4   19.32    4.02
 -16 -19   3   23.77    3.91
 -16 -18 -14  -10.59    9.34
 -16 -18   2   95.91    4.88
 -16 -17 -13    6.52    9.33
 -16 -17   1   12.86    5.52
 -16 -16 -12   41.64    8.24
 -16 -16   0   61.94    5.37
 -16 -15 -11   13.73    7.76
 -16 -15 -10   77.37    9.56
 -16 -15  -2   13.55    4.92
 -16 -14  -8    3.27    6.65
 -16 -14  -7   20.80    6.57
 -16 -14  -6   20.12    6.43
 -16 -14  -5    7.56    6.10
 -16 -14  -4   47.56    6.20
 -15 -22   6   31.87    4.83
 -15 -18   4    3.32    4.89
 -15 -16 -15   -1.19    7.84
 -15 -15 -14   28.40    7.13
 -15 -14 -12   50.61    9.25
 -15 -14   0   30.08    5.51
 -15 -13 -11    8.13    6.66
 -15 -13 -10   32.51    8.91
 -15 -13  -2  267.32    6.84
 -15 -12  -8   59.23    6.90
 -15 -12  -7   29.51    6.90
 -15 -12  -6   59.78    6.27
 -15 -12  -5   57.40    6.09
 -14 -16 -17   -0.66    6.95
 -14 -15 -16    5.24    6.89
 -14 -14 -15   -3.85    6.95
 -14 -13 -14   17.47    6.98
 -14 -13 -13   -2.00    8.41
 -14 -13   1   11.05    4.75
 -14 -12 -12    3.55    6.54
 -14 -12   0   18.54    4.26
 -14 -11 -10   65.61    6.69
 -14 -11  -9   23.91    7.84
 -14 -11  -8  114.56    8.40
 -14 -11  -3  196.52    6.50
 -13 -23   9    4.97    3.22
 -13 -16   6  110.20    4.10
 -13 -14 -17    7.05    6.89
 -13 -13 -16   37.24    7.08
 -13 -12 -15   17.30    6.18
 -13 -12 -14   23.10    8.75
 -13 -11 -13    8.63    6.19
 -13 -11   1  102.80    4.25
 -13 -10 -11    8.05    6.05
 -13 -10  -1  118.15    4.96
 -13  -9  -7   97.25    6.03
 -13  -9  -6   43.04    5.52
 -13  -9  -5  255.27    6.55
 -12 -19   9   -2.53    2.51
 -12 -17   8  103.53    3.50
 -12 -14 -18    4.16    9.52
 -12 -14   6  288.43    4.58
 -12 -13 -17   12.34    8.13
 -12 -12 -16   70.36    8.76
 -12 -12   4  265.23    4.65
 -12 -11 -15   -7.81    7.70
 -12 -11   3   42.03    3.08
 -12 -10 -14   54.78    6.60
 -12  -9 -12  115.32    6.74
 -12  -8  -9   51.70    5.53
 -12  -8  -8  210.25    6.51
 -12  -8  -7  185.01    7.65
 -12  -8  -6   46.00    7.14
 -12  -8  -5  165.97    7.01
 -12  -8  -4  417.25    6.92
 -11 -19  10    8.19    2.35
 -11 -15   8    3.22    2.54
 -11 -13 -19   -0.35    6.49
 -11 -12 -18   29.84    6.81
 -11 -11 -17   -2.36    6.00
 -11 -10 -16    0.79    5.86
 -11  -9 -14   -7.24    7.16
 -11  -9   2  526.31    5.28
 -11  -8 -12  317.28    9.04
 -11  -8   0   34.80    3.70
 -11  -7  -9  104.87    5.64
 -11  -7  -8   31.53    6.60
 -11  -7  -4  376.91    7.77
 -11  -7  -3  170.64    5.17
 -10 -23  12   15.07    2.27
 -10 -19  11    9.56    1.82
 -10 -13 -20  -11.36    6.66
 -10 -12 -19   16.11    8.44
 -10 -12   7   -0.11    1.99
 -10 -11 -18   11.18    7.68
 -10 -11   6   85.31    2.68
 -10 -10 -17   -5.11    8.11
 -10 -10   5    1.35    2.33
 -10  -9 -16   32.84    6.22
 -10  -8 -14   34.80    7.20
 -10  -7 -13   46.29    5.36
 -10  -7 -12  114.18    7.24
 -10  -7   0  100.77    4.50
 -10  -6 -10   33.89    4.99
 -10  -6  -9   22.73    4.85
 -10  -6  -3   36.32    4.22
  -9 -12 -20    7.48    7.52
  -9  -8 -16   24.29    7.20
  -9  -8   4  115.96    2.42
  -9  -6 -12   -2.81    6.45
  -9  -5  -9   47.55    4.84
  -9  -5  -8  493.15    8.10
  -9  -5  -3  243.20    4.93
  -8  -7 -16   49.28    7.00
  -8  -5 -12   51.80    6.61
  -8  -5   0  301.05    3.73
  -8  -4  -9  198.24    5.47
  -8  -4  -8  109.84    4.93
  -8  -4  -7  121.66    6.52
  -8  -4  -5  294.80    6.17
  -8  -4  -4  116.68    3.95
  -7  -6 -16   69.79    5.86
  -7  -5 -14    0.46    6.81
  -7  -5   2  745.21    4.15
  -7  -4 -12  256.95    5.81
  -7  -3  -7   97.28    4.41
  -7  -3  -6   15.47    3.96
  -6  -6 -17  -12.22    6.25
  -6  -5 -16   27.81    4.91
  -6  -4 -14   51.26    5.11
  -6  -3 -11   29.35    4.21
  -5  -5 -17   -5.77    4.48
  -5  -4 -15   19.85    6.60
  -5  -4   3   83.49    1.62
  -5  -3 -13   56.11    4.67
  -5  -2  -9  254.54    5.81
  -4  -5 -18    1.30    4.79
  -4  -1  -7  374.35    4.35
  -4  -1  -6  687.47    5.13
  -3  -9 -23    5.59    5.61
  -3  -8 -22    5.87    7.00
  -3  -7 -21   11.49    6.68
  -3  -6 -20    2.77    6.31
  -3  -5 -19   29.49    5.42
  -3  -3 -16  155.63    5.25
  -2 -18  16   10.35    2.66
  -2  -3 -17    4.97    3.90
  -2   0  -7    1.63    2.22
  -2   0  -6 2082.95    6.97
  -2   0  -5    1.30    2.06
  -1 -20  17    8.87    3.15
  -1  -4 -19    4.26    5.70
  -1  -1 -14  193.96    4.56
   0 -10  13   -5.92    2.27
   0  -7 -23    1.97    4.61
   0  -6 -22   56.93    5.01
   0  -5 -21    4.35    4.17
   0   0 -12  509.91    5.73
   2 -20  18   11.67    4.11
   2 -14  16    3.29    4.08
   2  -6 -23    5.50    4.11
   2  -2 -18   59.98    4.86
   2  -2   6  144.05    3.22
   3 -19  18    3.84    4.59
   3  -7 -24    9.88    5.19
   3  -7  12   92.85    4.43
   3  -4   9   30.50    2.55
   3  -3 -20   44.18    5.25
   3  -1 -17    7.55    4.14
   3   0   3   -1.51    3.00
   4 -18  18   11.72    5.14
   4 -15  17    1.59    5.45
   4 -11  15   -4.86    3.87
   4  -8  13   36.46    3.57
   4  -2   7    1.33    3.56
   4   2  -9   75.10    1.65
   5 -17  18   21.10    5.51
   5  -9  14  129.63    4.53
   5  -5 -23   -5.08    4.36
   5  -4 -22   20.74    4.19
   5   0   4  409.94    4.13
   6 -17  18   22.64    4.91
   6 -14  17   47.57    5.62
   6 -12  16   15.70    4.35
   6 -10  15   35.19    5.40
   6  -6  12   31.22    4.14
   6  -5  11   61.68    4.05
   6  -4  10   33.26    3.67
   6  -3 -21   20.25    3.75
   6  -3   9    7.05    4.53
   7 -16  18   40.26    5.88
   7 -10  15   38.31    4.38
   7  -7  13    8.39    4.21
   7  -2   8  427.29    6.34
   7   0 -17   -2.79    2.55
   7   2 -12  246.58    1.90
   7   2   0    7.17    2.25
   8 -16  18   13.50    4.92
   8  -8  14  142.84    6.92
   8  -2   8   25.77    3.81
   8   0   5   -8.05    3.16
   8   1   3  111.78    3.40
   8   3  -6  117.25    1.73
   9 -13  17   24.21    7.28
   9 -11  16   38.58    6.87
   9  -8  14   77.85    5.06
   9  -1   7  224.95    6.24
   9   3  -4  775.84    4.58
  10 -13  17   -4.55    6.69
  10 -11  16   18.45    6.83
  10  -8  14   23.63    4.95
  10  -1   7   31.98    4.24
  10   2   1 1589.28    7.94
  10   3  -9  176.48    1.76
  11 -15  18   39.38    7.57
  11 -13  17   -8.27    5.56
  11 -11  16   71.37    6.08
  11  -8  14   79.48    5.32
  11  -1   7   98.08    4.87
  11   2   1  190.17    4.01
  11   3  -9   46.81    1.52
  11   3  -3   13.83    3.16
  12 -15  18    8.63    7.17
  12 -13  17    0.46    5.83
  12 -11  16   49.53    6.04
  12  -8  14   -2.09    5.21
  12  -1   7  123.13    5.01
  12   2   1   65.38    3.88
  12   3  -9   71.81    1.81
  12   3  -3   84.38    3.99
  13 -15  18   32.05    7.54
  13 -13  17    7.12    8.09
  13 -11  16   75.18    8.06
  13  -8  14   30.29    5.71
  13  -1   7   22.94    4.65
  13   2   1  446.04    5.80
  13   3  -9   94.91    2.36
  13   3  -4  239.18    3.99
  13   3  -3  153.25    4.57
  14 -13  17   10.39    7.69
  14 -11  16  -10.18    7.08
  14  -8  14   31.95    5.67
  14  -1   7  134.99    5.44
  14   2   1  214.18    6.34
  14   3  -8  218.72    3.48
  14   3  -4   26.86    3.37
  15 -13  17    2.87    8.11
  15 -11  16   32.72    7.59
  15  -8  14   12.77    7.49
  15  -7  13   36.66    5.78
  15  -2   8  184.01    5.83
  15  -1   7   21.27    6.25
  15   0   5   -2.73    4.47
  15   1   3  124.97    5.08
  15   3  -8   20.43    3.04
  15   3  -7   82.97    3.54
  15   3  -6   40.87    3.62
  15   3  -5  156.48    4.61
  16 -14  17   -0.65    6.51
  16 -10  15   -5.58    6.08
  16  -7  13   29.23    6.03
  16  -3   9    6.14    4.84
  16  -2   8   77.99    5.27
  16   0   5   -0.66    6.16
  16   1   3    4.09    5.73
  16   2   0  269.37    5.88
  17 -12  16   -8.27    6.31
  17 -10  15   -2.60    7.72
  17  -7  13   24.80    8.65
  17  -6  12    4.03    5.99
  17  -5  11   -2.37    5.71
  17  -4  10   92.24    6.23
  17  -3   9   19.23    5.55
  17  -1   6  132.48    5.79
  17   2 -12   53.32    2.64
  17   2  -1   27.88    4.45
  18 -12  16   41.45    7.98
  18  -9  14   -2.64    6.38
  18  -6  12   37.07    8.18
  18  -5  11  -16.48    8.24
  18  -4  10   21.17    8.40
  18  -1   6  106.32    5.92
  18   0   4    5.83    4.68
  18   1   2   38.29    5.28
  18   2 -11   25.84    3.06
  18   2  -1  131.60    7.08
  19 -11  15   -0.33    6.45
  19  -9  14   16.18    7.88
  19  -8  13   53.66    6.75
  19  -2   7   67.48    6.30
  19   0 -16   18.38    1.69
  19   1   1   15.31    4.94
  19   2 -10  134.36    4.22
  19   2  -3   41.54    4.49
  19   2  -2   64.07    6.14
  20 -11  15    4.90    8.29
  20 -10  14    2.81    6.87
  20  -7  12   58.61    7.16
  20  -6  11    3.11    6.72
  20  -5  10  124.59    7.15
  20  -4   9   -9.94    5.93
  20  -3   8   61.48    6.38
  20  -1   5   40.43    6.13
  20   0   3   11.08    5.69
  20   1 -13   11.73    2.83
  20   1   0  102.74    5.64
  20   2  -8   26.08    4.79
  20   2  -7   39.65    4.92
  20   2  -6   42.57    4.42
  20   2  -5    5.90    5.00
  20   2  -4   57.76    6.04
  21 -10  14   23.53    8.83
  21  -9  13   14.87    7.06
  21  -6  11   20.57    8.31
  21  -5  10  -21.16    8.54
  21  -4   9    6.68    7.83
  21  -2   6   40.19    6.46
  21   0   2   -1.88    5.86
  21   1 -12    7.51    3.11
  21   1  -1   -0.96    4.63
  22  -9  13   32.21    9.82
  22  -8  12   17.70    6.92
  22  -4   8   15.95    6.77
  22  -3   7   15.44    6.11
  22  -1 -16    2.16    1.91
  22  -1   4  120.00    8.32
  22   0   1   14.41    5.49
  22   1 -10    9.27    4.12
  22   1  -2   36.92    6.46
  23  -7  11  -12.60    8.24
  23  -6  10   -5.42    7.95
  23  -5   9   -3.81    8.98
  23  -3   6    0.79    6.60
  23  -2   5    8.96    8.70
  23   0   0  194.11    7.13
  23   1  -8    4.01    4.84
  23   1  -7   25.09    5.17
  23   1  -6   67.13    6.05
  23   1  -5   25.11    6.33
  23   1  -4  188.10    7.65
  24  -8  11   -6.17    7.21
  24  -7  10   10.71    6.95
  24  -5   8   10.40    6.83
  24  -4   7   12.21    6.92
  24  -2   4   54.39    6.84
  24  -1 -14   20.80    3.13
  24  -1   2   66.19    8.19
  24   0 -11    5.52    4.00
  24   0  -2  131.85    6.51
  24   0  -1    0.00    6.99
  25  -7  10   -0.76    9.23
  25  -6   9   12.09    8.62
  25  -4   6    3.34    6.91
  25  -3   5   19.94    9.34
  25  -2   3   -1.64    6.79
  25  -1   0   69.70    6.52
  25  -1   1  -21.81    7.60
  25   0  -9   -1.13    4.59
  25   0  -8   64.29    4.87
  25   0  -7   18.92    4.57
  25   0  -6   87.11    5.57
  25   0  -5    3.90    5.19
  25   0  -4   11.74    5.51
  25   0  -3    8.97    6.94
  26  -6   8    3.83    7.34
  26  -5   7   18.92    9.04
  26  -3   4  -10.60    8.23
  26  -2   2   31.91    8.37
  26  -1 -11    3.22    4.10
  26  -1  -2   -5.00    5.83
  26  -1  -1    6.63    7.64
  27  -6   7   -3.97    7.47
  27  -5   6  -11.44    7.37
  27  -3   3   10.09    8.06
  27  -2   0   -0.73    6.78
  27  -1  -9    3.60    4.98
  27  -1  -8   16.18    6.00
  27  -1  -7   10.37    4.86
  27  -1  -6    6.57    5.14
  27  -1  -5    6.71    5.62
  27  -1  -4   53.91    7.66
  27  -1  -3   -2.99    7.99
  28  -5   5   -5.10    8.84
  28  -4   3    2.61    7.34
  28  -3   1    1.63    6.81
  28  -2  -3   13.45    6.65
  28  -2  -2   34.06    6.83
  29  -3  -1   14.70    6.95
  29  -3   0    3.23    8.95
 -18 -22  -5   -0.41    8.31
 -18 -22  -4   -0.09    8.30
 -18 -22  -3   -0.80    5.76
 -18 -22  -2    8.66    4.95
 -18 -21  -7   11.84    6.85
 -18 -21  -6   19.41    7.03
 -18 -21  -5   -5.54    6.90
 -18 -21  -4   11.39    6.40
 -17 -23   2   20.87    2.94
 -17 -22   1   -5.89    5.94
 -17 -21   1   12.51    4.67
 -17 -20   0   18.47    4.88
 -17 -19 -11    3.36    8.17
 -17 -19 -10    2.23    9.61
 -17 -19  -2   39.67    7.49
 -17 -19  -1    7.24    5.65
 -17 -18  -9   33.69    7.83
 -17 -18  -8  100.22    9.68
 -17 -18  -7   16.97    8.64
 -17 -18  -6   65.81    8.92
 -17 -18  -5   12.30    7.84
 -17 -18  -4   -6.20    8.27
 -17 -18  -3    2.98    6.03
 -17 -18  -2   48.69    5.96
 -17 -17  -7    3.11    7.02
 -17 -17  -6   15.36    6.73
 -17 -17  -5    2.41    6.38
 -16 -23   4    0.90    5.61
 -16 -22   4   24.13    4.21
 -16 -21   3    2.87    5.03
 -16 -20   3   10.66    3.99
 -16 -19   2   -8.80    4.96
 -16 -18 -13    8.48    7.74
 -16 -18   1   44.85    6.41
 -16 -17 -12   19.56    7.82
 -16 -17 -11   -2.01    9.17
 -16 -17   0   64.87    6.55
 -16 -16 -11   -2.03    7.50
 -16 -16 -10   58.17    9.57
 -16 -16  -2  185.01    7.73
 -16 -16  -1    8.04    5.20
 -16 -15  -9    8.79    6.68
 -16 -15  -8   70.40    7.87
 -16 -15  -7    4.41    6.54
 -16 -15  -6   23.83    8.37
 -16 -15  -5    4.56    7.74
 -16 -15  -4   16.07    5.90
 -16 -15  -3  -11.11    5.42
 -15 -24   6   -0.54    4.32
 -15 -23   6   -2.67    4.19
 -15 -20   5    3.65    3.48
 -15 -19   4   43.42    4.70
 -15 -17 -15   14.94    8.10
 -15 -17 -14   15.85    9.13
 -15 -17   3   24.88    3.93
 -15 -16 -14   -4.29    7.18
 -15 -16 -13   11.48    8.97
 -15 -16   2    8.58    4.01
 -15 -15 -13    7.03    6.87
 -15 -15 -12   -7.59    8.83
 -15 -15   1   -3.35    3.64
 -15 -14 -11  -14.75    7.01
 -15 -14 -10   80.92    8.85
 -15 -14  -1   16.29    4.61
 -15 -13  -9   19.18    6.84
 -15 -13  -8   15.21    6.40
 -15 -13  -7   93.48    8.55
 -15 -13  -6   17.55    7.91
 -15 -13  -5   58.57    7.95
 -15 -13  -4   56.38    5.78
 -15 -13  -3   88.73    5.79
 -14 -21   7   -2.25    3.01
 -14 -19   6   58.76    4.09
 -14 -17   5   14.27    3.20
 -14 -16 -16    2.85    7.37
 -14 -16   4   29.63    4.33
 -14 -15 -15    5.31    7.11
 -14 -15   3    0.42    4.73
 -14 -14 -14   42.57    7.03
 -14 -14   2   52.50    4.67
 -14 -13 -12    6.20    8.30
 -14 -12 -11   -5.02    6.20
 -14 -12 -10   10.58    7.91
 -14 -12  -2   17.86    6.58
 -14 -12  -1  191.60    5.87
 -14 -11  -7   -1.49    5.48
 -14 -11  -6  204.59    7.31
 -14 -11  -5   12.38    5.73
 -14 -11  -4  155.76    6.51
 -13 -20   8    4.01    3.13
 -13 -18   7   22.99    3.38
 -13 -15 -17    2.37    6.89
 -13 -15   5   46.52    4.09
 -13 -14 -16    9.41    6.66
 -13 -14   4  210.55    5.21
 -13 -13 -15    1.67    6.67
 -13 -13   3   -0.30    3.92
 -13 -12 -13   -1.02    8.09
 -13 -12   2  269.00    4.89
 -13 -11 -12   96.78    6.89
 -13 -11   0   58.53    4.33
 -13 -10 -10  142.08    7.01
 -13 -10  -9   55.84    6.41
 -13 -10  -8  262.97    8.99
 -13 -10  -3   11.35    6.51
 -13 -10  -2  130.72    5.49
 -12 -23  10    7.88    3.17
 -12 -15 -18    6.75    9.24
 -12 -13   5    1.32    2.48
 -12 -11 -14   56.99    8.29
 -12 -10 -13   36.58    6.45
 -12 -10   1   13.93    3.52
 -12  -9 -11   -0.01    5.26
 -12  -9 -10  243.21    8.43
 -12  -9  -2    5.75    5.35
 -12  -9  -1  401.62    6.13
 -11 -23  11    0.16    2.55
 -11 -17   9    1.95    2.37
 -11 -14 -19    0.09    6.79
 -11 -13 -18    5.42    6.56
 -11 -12 -17   22.55    8.05
 -11 -11 -16   61.47    6.28
 -11 -10 -15    0.82    6.06
 -11 -10   3   17.02    3.70
 -11  -9 -13   82.11    7.62
 -11  -8 -11   43.41    5.37
 -11  -8  -1  694.32    7.53
 -11  -7  -7   65.42    5.08
 -11  -7  -6   61.79    5.11
 -11  -7  -5  148.13    5.47
 -10 -17  10  101.10    2.41
 -10 -15   9   12.22    1.96
 -10 -14 -20   18.87    8.59
 -10 -13 -19    6.08    8.05
 -10  -9 -15   21.01    7.09
 -10  -8   2  374.64    4.33
 -10  -7 -11    3.51    6.69
 -10  -6  -8   57.49    4.98
 -10  -6  -7  207.79    5.85
 -10  -6  -6  189.07    5.63
 -10  -6  -5   80.05    4.96
 -10  -6  -4   41.23    4.43
  -9 -17  11   10.31    1.66
  -9 -15  10    1.59    1.55
  -9 -12   8   54.04    1.86
  -9 -11 -19   61.92    6.49
  -9 -10 -18    9.04    6.01
  -9  -9 -17   -3.00    5.60
  -9  -9   5   -0.12    2.14
  -9  -8 -15   -1.58    7.02
  -9  -7 -14   38.11    5.96
  -9  -7   2  361.48    3.94
  -9  -6 -11  179.91    7.47
  -9  -6   0   50.33    2.84
  -9  -5  -7  380.12    6.39
  -9  -5  -6  183.47    5.41
  -9  -5  -5  340.55    5.92
  -9  -5  -4  634.59    6.69
  -8 -12 -21   29.76    6.08
  -8 -12   9   33.74    1.33
  -8 -11 -20   13.65    6.07
  -8 -10 -19   23.42    6.11
  -8  -9 -18    7.73    5.49
  -8  -8 -17   -2.85    5.30
  -8  -6 -14  125.68    6.08
  -8  -6   2  513.37    3.97
  -8  -5 -11  204.46    6.95
  -8  -4  -6   52.87    4.35
  -7 -10 -20    1.39    7.00
  -7  -9 -19   11.75    7.44
  -7  -8 -18   39.29    5.71
  -7  -7 -17    2.72    5.22
  -7  -6 -15   -2.69    6.25
  -7  -4 -11   12.19    4.20
  -7  -4  -1    9.68    2.53
  -6 -11 -22    8.10    6.34
  -6 -10 -21    9.22    6.17
  -6  -9 -20   -5.26    6.70
  -6  -8 -19   11.02    6.60
  -6  -7 -18   22.19    5.33
  -6  -5 -15   20.17    4.82
  -6  -4 -13   26.40    4.94
  -6  -3 -10  641.85    6.95
  -6  -3  -2   24.02    3.75
  -5  -8 -20   -0.75    5.31
  -5  -7 -19   36.93    5.15
  -5  -6 -18   20.71    5.07
  -5  -3 -12  101.29    6.07
  -5  -2  -4  213.02    4.53
  -5  -2  -3  327.35    3.82
  -4  -8 -21   15.14    5.56
  -4  -4 -16  290.85    6.37
  -4  -2 -11  149.66    5.60
  -3 -14  14   69.95    2.45
  -3 -10 -23    6.94    6.91
  -3  -7   9   38.89    1.36
  -3  -4 -17    2.27    4.22
  -3  -3 -15    7.21    5.31
  -3  -2 -13   40.85    4.00
  -3  -1 -10   32.58    3.32
  -3  -1  -2 1434.30    4.92
  -2 -13  14  124.69    2.96
  -2  -9 -23   -3.15    6.66
  -2  -4 -18   26.95    4.26
  -1 -14  15   38.77    3.16
  -1 -12  14   87.41    3.18
  -1  -9  12  102.52    2.83
  -1  -8 -23    0.58    5.13
  -1  -6 -21   14.35    4.83
  -1  -4   7  400.61    2.67
  -1  -3 -17    7.86    4.85
  -1   0 -10 1519.82    7.22
   0 -18  17   -2.44    3.17
   0 -13  15    5.84    3.18
   0  -3 -18   62.93    4.60
   1 -17  17   -2.27    4.01
   1  -7 -23    5.09    5.43
   1  -4 -20   12.99    4.23
   1   1  -9    0.68    2.20
   2 -19  18    0.63    4.14
   2 -16  17   11.12    4.58
   2  -6  11  141.80    4.04
   2  -5  10   22.65    3.45
   2  -1 -16   51.98    4.41
   2   0 -14   25.33    2.69
   3 -18  18   -0.19    4.59
   3 -15  17   22.78    4.74
   3 -13  16   53.14    4.86
   3 -11  15    9.31    4.83
   3  -8  13   14.42    3.93
   3  -6 -23    2.88    4.11
   3  -5 -22   37.27    4.94
   3  -4 -21   10.40    3.94
   3  -3   8  816.61    5.35
   3  -1   5  351.43    3.48
   4 -17  18   -5.27    5.03
   4  -9  14   28.27    3.59
   4  -3 -20   33.17    4.51
   5 -14  17   17.11    5.39
   5 -12  16   15.91    4.18
   5 -10  15   10.07    5.61
   5  -6  12  704.51    7.55
   5  -5  11    2.85    3.54
   5  -4  10  996.47    7.32
   5  -3   9  176.90    5.01
   5  -1   6  503.99    4.72
   5   1   2  895.50    4.89
   6 -16  18   16.91    5.58
   6  -7  13   -1.85    3.82
   6  -4 -22   54.07    4.18
   6  -2   8   39.50    4.35
   7 -13  17   -5.91    6.17
   7 -11  16   10.59    6.35
   7  -8  14  108.55    4.95
   7   0   5   -2.91    2.86
   7   1   3   60.24    3.09
   8 -15  18   -3.44    5.77
   8 -13  17   14.34    4.80
   8 -11  16   12.45    4.94
   8  -9  15  -10.18    5.53
   8  -1   7   30.72    3.90
   8   0 -17    1.64    2.29
   8   1 -15    1.69    1.88
   8   2   1  395.40    4.89
   8   3  -7   76.20    1.25
   8   3  -5  143.24    1.90
   9 -15  18   28.87    5.28
   9  -9  15   -0.74    4.55
   9  -5  12  226.58    7.81
   9  -4  11   -1.35    5.75
   9  -3  10   52.27    5.80
   9   2   1  140.56    3.41
   9   3  -3  343.74    3.78
  10 -15  18    6.80    5.57
  10  -9  15   26.41    4.84
  10  -6  13   60.81    6.81
  10  -5  12   53.27    5.36
  10  -4  11   83.34    5.07
  10  -3  10   32.97    4.40
  10  -1 -19   10.92    2.16
  10   0   6   53.46    5.58
  10   1   4  532.98    6.14
  10   2 -13   91.29    1.00
  10   3  -3  690.61    4.73
  11 -12  17   -5.12    7.07
  11  -9  15   12.29    5.42
  11  -6  13   -1.01    6.45
  11  -5  12   51.44    5.35
  11  -3  10   14.36    4.39
  11  -2   9  113.42    6.28
  11   0   6  477.52    6.37
  11   1   4  549.85    6.43
  11   3  -2  166.24    4.12
  12 -12  17    7.81    7.43
  12  -9  15   50.19    5.77
  12  -6  13    4.15    6.54
  12  -5  12  157.19    6.14
  12  -4  11   -1.76    4.81
  12  -3  10   34.76    4.77
  12  -2   9  163.02    7.06
  12   0   6   57.38    4.64
  12   1   4  298.18    5.66
  12   3  -2  354.45    5.39
  13 -12  17   21.88    7.54
  13  -9  15    8.98    5.52
  13  -6  13   67.41    7.27
  13  -4  11    3.83    4.97
  13  -3  10   38.56    5.11
  13  -2   9  173.18    7.32
  13   0   6  157.45    5.33
  13   1   4  239.81    5.53
  13   3  -2  583.95    6.52
  14  -9  15   -2.62    5.72
  14  -6  13   18.07    7.45
  14  -5  12  176.41    6.86
  14  -4  11    7.73    5.02
  14  -3  10  175.78    6.12
  14  -1 -19    2.28    1.18
  14   0   6  205.64    7.11
  14   1   4    5.22    4.31
  14   3  -9   24.55    2.23
  14   3  -3  216.41    4.50
  15  -9  15    5.86    6.10
  15  -5  12   36.35    7.52
  15  -4  11  162.53    7.66
  15  -3  10   -0.15    6.95
  15   1   4  256.09    7.13
  15   2 -13   41.05    1.69
  15   2   1   80.26    4.52
  15   3  -9   60.10    2.78
  15   3  -4  145.14    4.08
  15   3  -3  117.37    5.20
  16 -13  17   13.13    6.83
  16 -11  16   -1.06    6.50
  16  -9  15    9.53    8.29
  16  -8  14  137.76    7.40
  16  -4  11   16.08    7.43
  16  -1   7   34.35    4.90
  16   2   1   19.48    5.83
  16   3  -8   92.94    3.67
  16   3  -7   87.15    3.83
  16   3  -6  262.79    4.38
  16   3  -5   15.14    3.27
  16   3  -4   53.47    4.96
  17 -11  16   -3.07    7.83
  17  -8  14    2.33    6.32
  17  -2   8  149.67    6.05
  17  -1   7    7.08    6.81
  17   0   5   -2.11    4.80
  17   1 -15    5.28    1.46
  17   1   3   -2.47    4.73
  17   2   0    9.49    4.72
  18 -10  15    7.83    6.41
  18  -8  14   62.59    8.36
  18  -7  13   48.57    7.08
  18  -3   9   15.31    5.86
  18  -2   8    2.34    5.65
  18   0   5   10.62    6.92
  18   1   3   49.21    6.97
  18   2   0  194.64    7.74
  19 -10  15   -1.66    7.93
  19  -6  12   24.29    6.80
  19  -5  11    0.36    6.01
  19  -4  10  137.34    7.24
  19  -3   9   16.90    7.61
  19  -1 -18    2.37    0.90
  19  -1   6   46.21    5.94
  19   0   4  113.89    5.87
  19   1 -14   41.96    2.53
  19   1   2  126.44    6.05
  19   2  -1   40.87    6.31
  20  -9  14   18.10    7.10
  20  -2   7   19.71    5.99
  20   0   4   29.08    7.53
  20   1   1   15.36    5.22
  20   2  -9   40.78    4.21
  20   2  -3   32.09    4.48
  20   2  -2  191.10    6.95
  21  -7  12    9.44    6.70
  21  -3   8   20.36    6.14
  21  -2   7   10.13    7.88
  21  -1 -17   -1.22    1.71
  21  -1   5    2.65    5.88
  21   0 -15    1.26    2.31
  21   0   3    7.58    5.71
  21   1   0   41.91    5.27
  21   2  -7   26.52    5.09
  21   2  -6   82.26    5.68
  21   2  -5   15.49    5.94
  21   2  -4   99.11    6.27
  22 -10  14   -1.73    7.38
  22  -7  12   23.15    8.45
  22  -6  11   11.79    8.61
  22  -5  10   28.30    8.41
  22  -4   9   32.47    8.85
  22  -2   6   15.42    6.03
  22   0 -14   20.14    2.63
  22   0   2   95.99    6.37
  22   1 -11    4.30    3.51
  22   1  -1  -11.97    5.16
  23  -8  12    8.74    7.08
  23  -4   8   13.09    6.91
  23  -3   7   13.16    6.96
  23  -1   4  129.61    8.72
  23   0 -13   -3.45    3.07
  23   0   1   -9.34    5.75
  23   1  -9   -2.60    3.71
  23   1  -3    6.99    5.49
  23   1  -2  241.01    8.38
  24  -8  12   -5.86    8.65
  24  -7  11   20.13    8.52
  24  -6  10  -16.66    8.77
  24  -5   9    1.95    8.34
  24  -4   8    2.09    8.26
  24  -3   6   37.05    7.16
  24  -2   5   -6.78    9.04
  24  -1   3   37.87    8.25
  24   0 -12   35.47    4.03
  24   0   0  145.43    6.93
  24   1  -6  113.72    6.59
  24   1  -5    4.55    6.18
  25  -8  11    8.49    7.26
  25  -5   8   10.03    7.23
  25  -4   7   19.12    7.02
  25  -2   4    8.85    8.15
  25  -1   2   58.93    8.32
  25   0 -10   29.54    4.66
  25   0  -2   39.99    6.33
  25   0  -1    4.28    7.25
  26  -6   9   22.79    9.08
  26  -4   6   29.80    7.14
  26  -3   5    5.15    8.56
  26  -2   3    0.65    8.10
  26  -1   0   -2.36    6.18
  26   0  -7    6.69    5.46
  26   0  -6   11.95    6.03
  26   0  -5  -10.57    7.30
  26   0  -4   16.34    7.21
  27  -5   7   -4.34    9.16
  27  -4   5   -6.37    7.24
  27  -3   4   30.85    8.93
  27  -2   1    0.44    6.55
  27  -2   2   25.44    8.46
  27  -1  -2   58.56    6.67
  27  -1  -1   18.91    7.96
  28  -4   4    0.48    7.78
  28  -3   2    0.71    6.87
  28  -2  -1   -1.44    6.93
  28  -2   0   16.07    8.69
  28  -1  -6   33.69    6.97
  28  -1  -5   -8.39    7.00
  29  -3   1   -1.34    9.21
  29  -2  -2  -16.81    8.21
 -17 -23   1    0.22    3.25
 -17 -22   0    3.42    4.74
 -17 -21  -1   13.54    7.30
 -17 -21   0   90.61    6.27
 -17 -20 -10   27.39    8.00
 -17 -20  -9   -7.56    8.61
 -17 -20  -2   13.41    6.87
 -17 -20  -1    4.48    5.28
 -17 -19  -9  -14.75    7.54
 -17 -19  -8    1.10    7.75
 -17 -19  -7   18.68    8.92
 -17 -19  -6    6.40    9.08
 -17 -19  -5   13.10    8.56
 -17 -19  -4   17.70    7.56
 -17 -19  -3  -13.46    5.70
 -16 -24   4    1.84    2.07
 -16 -22   3    7.75    5.59
 -16 -20   2   41.52    5.37
 -16 -19 -13   -0.73    7.12
 -16 -19 -12   10.41    9.89
 -16 -19   1   19.83    6.12
 -16 -18 -12    8.32    8.00
 -16 -18 -11   33.33    9.68
 -16 -18   0   44.74    6.91
 -16 -17 -10   12.14    7.79
 -16 -17  -9   -7.07    9.07
 -16 -17  -1    4.97    5.46
 -16 -16  -9    4.07    7.23
 -16 -16  -8   14.90    6.81
 -16 -16  -7   26.48    8.27
 -16 -16  -6   63.39    9.40
 -16 -16  -5    8.60    8.93
 -16 -16  -4   67.56    7.93
 -16 -16  -3   11.90    5.63
 -15 -22   5   -1.90    4.71
 -15 -21   5    2.88    3.57
 -15 -18 -14   18.15    9.54
 -15 -18   3    5.70    4.87
 -15 -17 -13   -1.02    9.87
 -15 -17   2   89.52    5.81
 -15 -16 -12   31.41    9.33
 -15 -16   1   10.13    4.91
 -15 -15 -11   -2.64    6.63
 -15 -15 -10   -5.63    8.49
 -15 -15   0    2.32    4.15
 -15 -14  -9    0.30    6.77
 -15 -14  -8   88.98    9.44
 -15 -14  -7   -4.30    7.91
 -15 -14  -4   21.82    7.49
 -15 -14  -3    3.20    7.20
 -15 -14  -2   33.38    5.29
 -14 -23   7    8.60    3.99
 -14 -22   7   -0.05    3.91
 -14 -20   6   59.29    4.43
 -14 -18   5    7.97    4.50
 -14 -17 -16   -2.54    7.52
 -14 -16 -15    2.30    7.06
 -14 -15 -14   48.81    7.03
 -14 -14 -13   -5.69    6.60
 -14 -14 -12   41.35    8.65
 -14 -14   1  -10.67    4.69
 -14 -13 -11   40.09    6.62
 -14 -13   0   -1.84    4.06
 -14 -12  -9    8.26    6.40
 -14 -12  -8   46.03    6.57
 -14 -12  -7   52.45    8.15
 -14 -12  -6  299.46    9.53
 -14 -12  -5   57.70    7.60
 -14 -12  -4  158.92    8.45
 -14 -12  -3   -0.54    5.40
 -13 -21   8   53.39    4.26
 -13 -17   6   25.47    3.66
 -13 -16 -17   18.66    7.25
 -13 -15 -16   -4.12    6.90
 -13 -14 -15    5.30    6.71
 -13 -13 -14   81.04    7.41
 -13 -12 -12   -9.62    7.86
 -13 -12   1   82.76    5.22
 -13 -11 -11   14.04    6.06
 -13 -11 -10  -16.03    7.48
 -13 -11  -1   87.53    5.02
 -13 -10  -7  194.06    6.63
 -13 -10  -6  404.87    7.91
 -13 -10  -5   28.24    5.22
 -13 -10  -4  211.55    6.26
 -12 -20   9   -1.81    2.65
 -12 -18   8    8.93    3.05
 -12 -16 -18    3.51    8.55
 -12 -16   7   48.68    3.31
 -12 -14 -17    1.02    6.82
 -12 -13 -16   31.49    6.88
 -12 -12 -15   -9.41    6.68
 -12 -11 -13   58.02    7.84
 -12 -11   2  527.34    6.33
 -12 -10 -12   12.39    5.96
 -12 -10 -11   76.05    8.49
 -12 -10   0  136.30    5.78
 -12  -9  -9   56.53    5.51
 -12  -9  -8   85.20    5.66
 -12  -9  -7  195.47    7.81
 -12  -9  -4   29.66    6.24
 -12  -9  -3  158.73    5.32
 -11 -15 -19    8.04    7.01
 -11 -14 -18   -0.14    8.16
 -11 -14   7   -2.68    2.62
 -11 -13 -17  -11.49    7.98
 -11 -13   6  117.36    3.42
 -11 -12 -16   50.08    8.07
 -11 -11 -15    0.12    7.27
 -11 -11   4  211.99    4.33
 -11 -10 -14   54.54    6.34
 -11  -9 -12    2.91    5.78
 -11  -9   1   61.68    3.62
 -11  -8 -10  160.68    6.18
 -11  -8  -9  177.77    7.99
 -11  -8  -2   31.96    5.69
 -10 -12 -18   36.20    6.51
 -10 -11 -17    6.23    6.21
 -10 -10 -16   17.12    5.86
 -10  -9 -14  107.68    8.27
 -10  -9   3   14.98    3.37
 -10  -8 -13   54.11    5.81
 -10  -7 -10   67.04    5.19
 -10  -7  -1  148.54    4.33
  -9 -13 -20   15.49    6.69
  -9 -12 -19   17.11    6.15
  -9 -11 -18   31.45    7.78
  -9 -11   7   40.76    1.94
  -9 -10 -17    8.23    7.21
  -9 -10   6   83.67    2.26
  -9  -9 -16   47.67    6.04
  -9  -7 -13  140.98    5.82
  -9  -6 -10   47.75    6.26
  -9  -6  -1    5.61    3.33
  -8 -13 -21   -4.98    6.02
  -8 -12 -20   28.65    7.79
  -8 -11 -19    6.09    7.39
  -8  -9 -17    4.08    6.66
  -8  -8 -16   91.55    7.28
  -8  -8   5   -1.23    1.36
  -8  -7 -15    0.12    5.50
  -8  -6 -13  199.66    6.29
  -8  -5 -10   91.93    5.02
  -8  -5  -1  114.95    3.30
  -7  -7 -16   32.18    6.82
  -7  -7   5    2.17    1.17
  -7  -5 -13   46.55    5.00
  -7  -4 -10  606.64    7.21
  -7  -4  -9  176.63    6.32
  -6 -12 -22    2.51    6.27
  -6  -6 -16   10.00    4.86
  -6  -5 -14   63.69    6.51
  -6  -4 -12   30.76    5.60
  -6  -4   1  416.40    3.26
  -6  -3  -9   -1.25    3.96
  -6  -3  -8 1101.80    8.66
  -6  -3  -3   19.80    4.03
  -5 -11 -22    8.91    7.58
  -5  -6 -17   27.63    6.56
  -5  -6   6   55.08    0.83
  -5  -5 -16   60.73    5.18
  -5  -4 -14  313.19    6.53
  -5  -2  -7  244.43    4.25
  -5  -2  -6 1219.56    7.04
  -5  -2  -5  126.21    3.41
  -4 -21  16    3.09    1.69
  -4 -15  14   66.41    2.04
  -4 -10 -22   -6.27    7.32
  -4 -10  11   85.61    1.51
  -4  -9 -21    7.12    6.99
  -4  -5 -17    8.86    4.48
  -4  -4 -15   -8.67    5.76
  -4  -3 -13   35.76    5.37
  -4  -2 -10   53.27    4.82
  -3 -19  16    1.89    2.08
  -3 -16  15   -2.42    2.01
  -3 -12  13   32.48    2.09
  -3  -9 -22    2.64    5.77
  -3  -8 -21   10.76    7.70
  -3  -8  10  294.30    2.19
  -3  -7 -20   73.17    7.75
  -3  -6   8 1068.45    3.01
  -3  -5 -18   47.52    4.64
  -2 -11  13   24.62    2.51
  -2  -8 -22   30.27    5.94
  -2  -7 -21    5.17    5.27
  -2  -6 -20   37.48    5.38
  -2  -3 -16  163.09    4.95
  -2  -2 -14   69.18    4.17
  -2  -1 -11   15.09    4.21
  -1 -19  17    0.85    3.11
  -1 -16  16    6.07    2.70
  -1  -9 -23   10.98    6.43
  -1  -4 -18   87.48    5.66
  -1  -2 -15    5.02    3.58
  -1   0  -9    0.29    2.13
   0 -15  16    7.80    3.16
   0 -11  14   38.75    3.44
   0  -8 -23   -6.15    4.93
   0  -7 -22    4.58    6.24
   0  -7  11    1.47    2.47
   0  -6 -21   -4.77    5.42
   0  -6  10  627.38    4.22
   0  -5 -20   19.48    6.40
   0  -5   9    7.13    2.38
   0  -4 -19   -8.51    4.27
   0   0 -11   -9.03    3.64
   1 -20  18   -4.28    4.10
   1 -14  16   14.78    4.15
   1  -1 -15    0.93    2.99
   2  -7 -23   -3.71    5.86
   2  -6 -22   46.73    5.42
   2  -4 -20   27.33    5.54
   2  -4   9   60.30    2.39
   2  -3 -19    0.23    3.79
   3  -9  14   13.23    4.08
   3  -2   7   26.55    3.27
   4 -14  17    7.36    5.37
   4 -12  16   45.68    5.11
   4  -6 -23   -0.01    4.90
   4  -6  12   23.39    4.52
   4  -5  11   29.34    4.36
   4  -4 -21   -3.24    4.53
   4  -4  10  135.76    4.81
   4   0   4  603.97    4.38
   5 -16  18   16.71    5.41
   5  -7  13   45.92    3.93
   5  -2 -19   17.99    3.84
   5   2  -1 2518.10    6.06
   6 -13  17  -13.45    5.56
   6 -11  16   33.67    5.81
   6  -8  14  129.44    4.95
   6   0   5    6.17    3.27
   6   1 -14  103.79    2.36
   6   1   3   81.91    3.00
   6   2 -11  156.90    1.77
   6   2   0 2150.20    6.70
   7 -15  18   34.11    5.91
   7  -9  15   12.85    5.30
   7  -4 -22    1.09    3.74
   7  -4  11   18.98    5.12
   7  -1   7   46.01    3.76
   8 -17  19   -3.13    6.15
   8 -12  17   23.82    6.32
   8  -6  13  217.14    7.47
   8  -5 -23    1.36    3.59
   8  -5  12   36.88    4.91
   8  -4  11  116.99    4.99
   8  -3  10  303.25    5.60
   8   1   4    1.41    4.24
   8   3  -4   25.83    1.49
   9 -14  18   10.34    6.41
   9 -12  17   59.93    6.77
   9 -10  16   20.47    7.42
   9  -7  14   42.25    6.32
   9  -6  13   45.91    5.16
   9  -2 -20    4.94    2.49
   9  -2   9  226.52    5.33
   9   0   6  273.69    5.26
   9   1   4   82.92    4.16
  10 -14  18   16.08    6.85
  10 -12  17   31.25    5.88
  10 -10  16    7.24    5.79
  10  -7  14   72.73    5.49
  10  -2   9   91.03    4.78
  10   2   2   87.96    3.63
  10   3  -2 1118.69    6.07
  11 -14  18   14.69    6.04
  11 -10  16   11.79    5.70
  11  -7  14   19.63    5.37
  11  -1 -19    4.53    1.65
  11  -1   8  104.46    6.56
  11   2   2  771.07    6.68
  12 -14  18   19.20    6.11
  12 -10  16   65.84    6.08
  12  -7  14   61.54    5.90
  12  -1 -19    1.00    1.62
  12  -1   8  104.47    5.03
  12   2   2  115.16    4.36
  12   3 -10   62.11    1.64
  12   3  -1   84.16    4.52
  13 -14  18    7.92    6.20
  13 -10  16   25.33    6.12
  13  -8  15   24.84    7.06
  13  -7  14   11.49    5.74
  13  -1 -19   26.64    1.66
  13  -1   8   33.86    4.72
  13   2   2  144.85    4.77
  13   3 -10   31.33    1.90
  13   3  -1  114.67    5.12
  14 -14  18    4.74    6.48
  14 -12  17    0.98    6.48
  14 -10  16   61.19    6.64
  14  -7  14   26.71    5.82
  14  -2   9   40.80    4.89
  14  -1   8   51.40    6.41
  14   2   2  430.79    6.40
  14   3  -2   19.85    3.71
  15 -12  17   18.11    6.53
  15 -10  16    9.42    6.27
  15  -7  14   22.64    5.91
  15  -6  13  111.67    6.56
  15  -2   9   25.55    4.98
  15  -1   8    5.56    6.31
  15   0   6    1.79    4.61
  15   2   2   -2.17    4.20
  15   3  -2  514.70    6.24
  16 -12  17  -14.18    8.21
  16 -10  16  -18.44    8.63
  16  -7  14    9.12    8.74
  16  -6  13   14.57    6.25
  16  -5  12   13.04    5.90
  16  -3  10  135.24    6.60
  16  -2 -20    9.27    1.08
  16  -2   9   34.40    5.10
  16   0   6  263.71    6.49
  16   1   4   92.43    5.14
  16   2 -13    5.23    1.64
  16   2   2   75.76    5.95
  16   3  -9   13.79    2.83
  16   3  -3   64.05    4.12
  16   3  -2   19.64    5.00
  17 -12  17   41.64    8.68
  17  -9  15   12.90    6.34
  17  -6  13    9.02    7.69
  17  -5  12   70.45    6.64
  17  -4  11   35.35    6.12
  17  -3  10   15.43    5.76
  17  -2   9   17.86    6.95
  17   0   6  291.00    8.14
  17   1   4   80.52    7.15
  17   2   1   21.48    4.88
  17   3  -8   50.13    3.67
  17   3  -7   -1.66    2.95
  17   3  -6    3.62    3.05
  17   3  -5   34.87    3.48
  17   3  -4   45.77    3.88
  17   3  -3   45.78    5.30
  18 -11  16   -3.67    6.55
  18  -9  15   20.06    8.01
  18  -5  12   22.38    7.87
  18  -4  11   18.45    8.54
  18  -1   7   21.23    5.59
  18   2 -12    2.24    2.19
  18   2   1  103.76    6.90
  18   3  -6   58.90    4.64
  18   3  -5   30.65    4.77
  19 -11  16   -0.59    8.18
  19  -8  14   -0.97    6.44
  19  -2   8   55.49    6.23
  19  -1   7   73.50    7.62
  19   0   5   -3.35    5.74
  19   1   3    8.72    5.36
  19   2 -11   71.94    3.43
  19   2   0   76.27    5.51
  20 -10  15    2.81    7.09
  20  -8  14   13.78    8.41
  20  -6  12    8.97    6.72
  20  -5  11   -6.15    6.16
  20  -4  10   72.95    7.15
  20  -3   9   17.43    6.06
  20  -2   8    6.86    8.55
  20  -1   6   85.91    6.48
  20   1   2   68.26    5.72
  20   2 -10   38.46    3.83
  20   2  -1    5.54    6.10
  21  -9  14    6.60    6.88
  21  -6  12   43.60    9.53
  21  -5  11    4.23    8.18
  21  -4  10   64.44    8.59
  21  -1   6   -6.91    8.44
  21   0   4  110.25    6.84
  21   1 -13   -1.52    2.95
  21   1   1   13.85    5.58
  21   2  -9   -3.30    4.15
  21   2  -8   45.97    4.04
  21   2  -3   -2.44    4.38
  21   2  -2   35.56    6.28
  22  -9  14    0.80   10.11
  22  -3   8   29.50    6.98
  22  -2   7   20.76    7.93
  22  -1   5   39.24    6.46
  22   0   3   -8.26    5.76
  22   1 -12    8.72    3.35
  22   1   0   43.82    5.72
  22   1   1    3.76    7.02
  22   2  -6    6.90    5.50
  22   2  -5   -1.67    5.84
  23  -7  12  -10.47    8.69
  23  -6  11    9.84    6.85
  23  -5  10    9.76    6.94
  23  -4   9   17.33    8.15
  23  -3   8   10.01    8.61
  23  -2   6   73.86    6.80
  23   0   2   94.47    6.68
  23   1 -10   39.95    3.77
  23   1  -1   17.18    5.58
  24  -3   7   17.54    7.22
  24  -1   4   29.98    8.11
  24   0   1   -0.25    5.82
  24   1  -9    5.04    4.47
  24   1  -8  118.96    5.89
  24   1  -7    5.48    3.93
  24   1  -4   12.14    5.61
  24   1  -3   -0.80    6.97
  24   1  -2   73.95    7.36
  25  -7  11  -24.09    9.05
  25  -6  10   -3.83    7.74
  25  -5   9   15.20    8.96
  25  -4   8   31.28    8.67
  25  -3   6   -7.05    7.03
  25  -2   5    5.62    8.45
  25  -1   3   19.76    8.82
  25   0 -11    4.47    4.06
  25   0   0  120.55    8.44
  26  -5   8   35.39    7.41
  26  -4   7   17.23    7.66
  26  -2   4    1.07    9.38
  26  -1   1   13.80    6.54
  26  -1   2    0.39    8.06
  26   0  -9    3.38    4.94
  26   0  -8   17.33    4.64
  26   0  -3    0.11    5.73
  26   0  -2   34.90    7.66
  27  -4   6    9.76    7.30
  27  -3   5   11.75    9.06
  27  -2   3   -7.44    8.14
  27  -1   0   34.25    8.40
  28  -4   5   -7.81    8.04
  28  -3   3  -14.12    7.05
  28  -2   1    8.75    7.01
  28  -1  -7   -3.88    5.16
  28  -1  -4   25.74    6.38
  28  -1  -3   -0.38    6.38
  28  -1  -2   50.93    8.28
  29  -2  -1    7.64    6.84
 -17 -23  -1    5.63    5.48
 -17 -23   0    5.48    4.09
 -17 -22  -2   19.90    6.54
 -17 -22  -1    3.77    4.60
 -17 -21  -9  -12.94    7.05
 -17 -21  -8   -2.65    8.39
 -17 -21  -7    4.03    7.88
 -17 -21  -6  -10.52    7.99
 -17 -21  -4   19.98    7.83
 -17 -21  -3  -19.31    7.19
 -17 -21  -2   97.20    7.17
 -17 -20  -8   26.17    7.28
 -17 -20  -7  -17.46    6.72
 -17 -20  -6    3.19    7.04
 -17 -20  -5   13.23    6.71
 -17 -20  -4   -5.27    6.51
 -17 -20  -3    3.84    6.01
 -16 -24   3   -1.83    3.25
 -16 -23   3    1.29    2.37
 -16 -22   2   38.62    5.57
 -16 -21   2    6.19    4.47
 -16 -20 -12   -6.19    7.35
 -16 -20 -11  -10.29    8.99
 -16 -20   1   17.02    5.44
 -16 -19 -11   -1.37    7.00
 -16 -19 -10   54.60    9.88
 -16 -19   0   -1.31    6.22
 -16 -18 -10   69.22    8.41
 -16 -18  -9   -0.30   10.01
 -16 -18  -1   57.53    5.82
 -16 -17  -8   55.89    7.82
 -16 -17  -7   -3.46    6.94
 -16 -17  -6  122.87    9.17
 -16 -17  -5   -0.81    8.65
 -16 -17  -4  -10.04    7.50
 -16 -17  -3   17.84    5.52
 -16 -17  -2   75.26    6.05
 -15 -23   5    0.95    4.49
 -15 -20   4   34.77    4.06
 -15 -19 -14   -0.73    7.32
 -15 -19   3   20.52    5.47
 -15 -18 -13    3.96    7.54
 -15 -17 -12   23.75    7.48
 -15 -17   1   11.38    5.47
 -15 -16 -11   -2.76    7.27
 -15 -16 -10   64.47    9.43
 -15 -16   0   28.27    5.42
 -15 -15  -9  -18.04    6.51
 -15 -15  -8   16.88    8.77
 -15 -15  -2   99.82    6.90
 -15 -15  -1    5.84    4.58
 -15 -14  -6   92.13    7.09
 -15 -14  -5   28.35    6.25
 -14 -24   7   -4.63    4.62
 -14 -21   6   40.49    4.23
 -14 -18 -15   -5.83   10.37
 -14 -17 -15   -7.95    7.80
 -14 -17   4   19.76    3.52
 -14 -16 -14    1.55    6.65
 -14 -16   3    4.05    4.49
 -14 -15 -13   -5.04    6.78
 -14 -15 -12   40.46    9.08
 -14 -15   2   19.02    3.58
 -14 -14 -11    1.22    8.27
 -14 -13 -10   42.25    6.96
 -14 -13  -9   -2.24    6.14
 -14 -13  -2   32.51    7.20
 -14 -13  -1    9.08    4.73
 -13 -22   8    5.01    3.55
 -13 -19   7    0.35    3.56
 -13 -17 -16    9.77    8.86
 -13 -16 -16   12.25    7.01
 -13 -16   5   40.81    4.04
 -13 -15 -15    7.33    7.01
 -13 -15   4   53.31    4.38
 -13 -14 -14   14.65    6.86
 -13 -14   3   18.72    4.03
 -13 -13 -13    4.21    6.30
 -13 -13   2    3.98    3.36
 -13 -12 -11   10.63    6.36
 -13 -12   0  254.65    7.15
 -13 -11  -9   -9.56    5.98
 -13 -11  -8  136.88    6.34
 -13 -11  -7   25.72    7.48
 -13 -11  -3   50.48    7.39
 -13 -11  -2   37.25    5.18
 -12 -21   9   13.21    2.93
 -12 -16 -17   -2.92    8.46
 -12 -15 -17    9.32    7.15
 -12 -15   6   88.92    3.61
 -12 -14 -16   16.32    7.17
 -12 -14   5   40.35    3.57
 -12 -13 -15    4.65    6.55
 -12 -13   4  325.16    5.07
 -12 -12 -14  120.42    7.28
 -12 -12   3    5.78    2.86
 -12 -11 -12   54.84    6.41
 -12 -10 -10   25.29    6.02
 -12 -10  -1   32.41    5.86
 -12  -9  -6   92.03    5.60
 -12  -9  -5  138.19    5.79
 -11 -20  10   18.37    2.33
 -11 -16   8  101.56    3.45
 -11 -15 -18   14.76    8.49
 -11 -14 -17   10.77    8.21
 -11 -12   5    3.44    2.25
 -11 -11 -14   49.94    8.10
 -11 -10 -13   50.00    6.00
 -11 -10   2   75.02    4.22
 -11  -9 -11  107.83    5.97
 -11  -9   0  114.21    5.13
 -11  -8  -8  138.02    5.87
 -11  -8  -7  416.00    7.22
 -11  -8  -6   86.37    7.26
 -11  -8  -5  167.36    7.43
 -11  -8  -4    7.66    6.37
 -11  -8  -3   19.06    4.37
 -10 -20  11    0.83    2.05
 -10 -14   8    7.16    2.12
 -10 -13 -18   18.41    6.68
 -10 -12 -17   -9.36    6.31
 -10 -11 -16    9.89    5.67
 -10 -10 -15   -3.25    5.95
 -10  -9 -13   10.86    7.06
 -10  -8 -12   91.86    5.83
 -10  -8 -11   54.79    6.70
 -10  -8   1   23.59    3.03
 -10  -7  -9   79.42    5.30
 -10  -7  -8  292.40    7.73
 -10  -7  -3  113.86    5.83
 -10  -7  -2  159.34    4.67
  -9 -20  12   37.13    1.79
  -9 -14 -20    1.08    6.48
  -9 -13 -19   -0.95    7.56
  -9  -9 -15   28.74    7.39
  -9  -8 -14   95.74    6.35
  -9  -8   3   84.36    3.30
  -9  -7 -12   58.58    5.24
  -9  -7   1  138.76    3.79
  -9  -6  -9  171.26    5.60
  -9  -6  -8  175.25    6.92
  -9  -6  -2  130.39    3.91
  -8 -13 -20    0.47    7.35
  -8 -11   8  167.89    2.01
  -8 -10 -18   26.92    5.89
  -8  -9   6  108.45    2.14
  -8  -7 -14   72.89    5.73
  -8  -6 -12   46.46    4.83
  -8  -5  -9  179.49    5.57
  -8  -5  -8  164.84    6.62
  -8  -5  -2  156.69    3.75
  -7 -13 -21   12.16    7.50
  -7 -11 -20   12.20    6.20
  -7 -10 -19   -0.90    5.96
  -7  -9 -18   -2.69    5.46
  -7  -8 -17   10.38    5.33
  -7  -6 -14  136.82    5.93
  -7  -5 -12  128.05    5.14
  -7  -5   1  907.81    5.32
  -7  -4  -8  244.71    5.34
  -7  -4  -3   30.20    4.33
  -7  -4  -2  153.91    3.48
  -6 -10 -20    5.20    5.80
  -6  -9 -19    9.07    5.47
  -6  -8 -18   22.92    5.44
  -6  -7 -17   20.14    5.29
  -6  -5   3   20.35    1.71
  -6  -4 -11    8.72    5.80
  -6  -3  -7  476.24    5.88
  -6  -3  -6  239.79    5.33
  -6  -3  -5  121.48    4.73
  -6  -3  -4   71.83    3.76
  -5 -12 -22    0.42    7.57
  -5 -11  11   28.29    0.82
  -5  -9 -20   -0.65    5.36
  -5  -7 -18   53.04    5.41
  -5  -5 -15   -1.54    5.83
  -5  -4 -13   -7.53    6.06
  -5  -3 -11   80.12    4.33
  -5  -3   0  400.41    3.28
  -4 -13  13    3.58    1.55
  -4  -8 -20   56.73    6.00
  -4  -7 -19   24.23    5.27
  -4  -3   2  240.76    2.05
  -4  -2  -1  500.51    3.49
  -3 -11 -23    2.56    6.16
  -3  -9  11  109.43    1.94
  -3  -4 -16   43.22    4.46
  -3  -3 -14  225.32    6.44
  -3  -2 -12   47.05    3.89
  -3  -1  -8   42.22    2.80
  -3  -1  -7  123.92    4.11
  -3  -1  -3  404.39    3.45
  -2 -17  16    8.38    2.69
  -2 -10 -23   11.77    5.40
  -2  -9 -22    6.00    6.98
  -1 -10  13   48.42    2.57
  -1  -8 -22    6.96    5.31
  -1   0  -8 1924.97    7.58
   0  -8  12  354.86    4.31
   0  -4   8 1111.28    4.99
   0  -3 -17    1.92    5.15
   1 -10  14   61.60    3.98
   1  -8 -23   -1.15    5.56
   1  -3 -18   79.53    4.65
   2 -18  18   10.68    4.57
   2 -13  16   29.85    3.42
   2 -11  15   15.30    4.68
   2  -8  13   14.03    4.01
   2  -5 -21   25.47    4.40
   2  -3   8  360.79    4.23
   2  -2 -17   13.20    4.70
   2   0 -13    0.30    3.14
   3 -17  18    5.93    4.53
   3 -12  16   52.33    4.82
   3  -7 -23    2.33    5.09
   4 -16  18   11.69    4.96
   4 -10  15    3.33    3.65
   4  -7  13   47.49    5.00
   4  -3   9   41.23    3.87
   4  -1   6  577.86    4.64
   5 -13  17    2.22    5.29
   5 -11  16   81.15    5.83
   5  -8  14  143.45    4.57
   5  -6 -23    3.85    4.61
   5  -5 -22   38.56    4.61
   5  -4 -21    5.27    4.37
   5  -2   8  951.67    6.62
   5   0   5    6.89    3.76
   6 -15  18    8.38    4.54
   6  -9  15   18.39    4.05
   6  -4  11   20.84    4.92
   6  -2 -19   39.21    3.68
   6  -1   7  170.48    3.85
   7 -17  19   -5.81    6.22
   7 -14  18   10.54    5.77
   7 -12  17   20.29    6.37
   7  -6  13    4.32    4.38
   7  -5  12  165.58    5.21
   7  -3  10   22.94    3.93
   7   2   1   71.22    2.74
   8 -14  18   28.51    5.11
   8 -10  16   63.74    5.52
   8  -7  14  102.07    5.18
   8  -4 -22    3.88    3.42
   8   0   6   79.64    4.17
   8   3  -8  186.42    1.26
   8   3  -3  203.37    2.55
   9 -16  19   -0.67    6.53
   9  -8  15   21.71    6.40
   9  -5 -23    1.67    3.30
   9  -1   8  140.21    4.82
   9   0 -17    1.41    1.95
   9   2   2   88.14    3.32
   9   3  -9   54.10    0.93
   9   3  -2  211.81    3.08
  10 -11  17   10.76    7.14
  10  -8  15   12.31    5.10
  10  -1   8  317.04    5.87
  10   1   5   71.30    5.52
  10   3  -1   76.43    3.79
  11 -13  18   19.91    8.27
  11 -11  17   -8.99    7.14
  11  -8  15   93.19    5.63
  11   1   5  110.29    4.73
  11   3 -10   16.94    1.04
  11   3  -1  541.98    5.07
  12 -13  18   11.62    7.80
  12 -11  17    7.13    7.54
  12  -8  15   37.30    5.70
  12   0   7   -5.82    6.05
  12   1   5   97.24    4.74
  12   2   3   56.96    5.81
  13 -13  18   13.33    7.96
  13 -11  17   10.44    6.40
  13  -9  16   67.83    7.80
  13  -5  13   40.57    7.09
  13  -4  12  173.05    8.25
  13  -3  11   85.95    7.48
  13   0   7    1.74    6.28
  13   1   5  100.10    5.01
  13   2   3   67.47    6.14
  14 -13  18   -0.16    7.97
  14 -11  17    9.66    7.81
  14  -9  16   18.78    7.36
  14  -8  15   -9.64    5.69
  14  -5  13   85.89    7.89
  14  -3  11   13.10    6.68
  14   0   7   10.10    6.52
  14   1   5  140.54    5.38
  14   2   3  406.80    7.59
  14   3 -10  180.78    2.65
  14   3  -1  121.00    4.37
  15 -13  18    2.91    8.95
  15 -11  17    0.97    8.08
  15  -8  15   13.86    6.13
  15   1   5   21.88    4.71
  15   3 -10   -3.17    1.94
  15   3  -1  115.22    4.53
  16 -11  17    8.43    8.12
  16  -8  15    9.52    6.58
[truncated: 245,011 more chars]
