# Supplementary material
Source: MDPI journal article supplement (https://www.mdpi.com/2304-6740/6/3/66)
Supplement: s1 [file s1 › ATA_519C_0mfinal.cif]

data_ata_519c_0m
_audit_creation_date               2018-06-04
_audit_creation_method
;
Olex2 1.2
(compiled 2018.05.18 svn.r3508 for OlexSys, GUI svn.r5497)
;
_shelx_SHELXL_version_number       '2016/6'
_audit_contact_author_address      ?
_audit_contact_author_email        ?
_audit_contact_author_name         ''
_audit_contact_author_phone        ?
_publ_contact_author_id_orcid      ?
_publ_section_references
;
Dolomanov, O.V., Bourhis, L.J., Gildea, R.J, Howard, J.A.K. & Puschmann, H.
 (2009), J. Appl. Cryst. 42, 339-341.

Sheldrick, G.M. (2015). Acta Cryst. A71, 3-8.

Sheldrick, G.M. (2015). Acta Cryst. C71, 3-8.
;
_chemical_name_common              ?
_chemical_name_systematic          ?
_chemical_formula_moiety          
 'C48 H52 Mn4 N4 O20 Tb, 5(C H2 Cl2), C16 H36 N'
_chemical_formula_sum              'C69 H98 Cl10 Mn4 N5 O20 Tb'
_chemical_formula_weight           2050.70
_chemical_melting_point            ?
loop_
  _atom_type_symbol
  _atom_type_description
  _atom_type_scat_dispersion_real
  _atom_type_scat_dispersion_imag
  _atom_type_scat_source
 'C' 'C' 0.0033 0.0016 'International Tables Vol C Tables 4.2.6.8 and 6.1.1.4'
 'H' 'H' 0.0000 0.0000 'International Tables Vol C Tables 4.2.6.8 and 6.1.1.4'
 'Cl' 'Cl' 0.1484 0.1585 'International Tables Vol C Tables 4.2.6.8 and 6.1.1.4'
 'Mn' 'Mn' 0.3368 0.7283 'International Tables Vol C Tables 4.2.6.8 and 6.1.1.4'
 'N' 'N' 0.0061 0.0033 'International Tables Vol C Tables 4.2.6.8 and 6.1.1.4'
 'O' 'O' 0.0106 0.0060 'International Tables Vol C Tables 4.2.6.8 and 6.1.1.4'
 'Tb' 'Tb' -0.1723 4.1537
 'International Tables Vol C Tables 4.2.6.8 and 6.1.1.4'

_shelx_space_group_comment
;
The symmetry employed for this shelxl refinement is uniquely defined
by the following loop, which should always be used as a source of
symmetry information in preference to the above space-group names.
They are only intended as comments.
;
_space_group_crystal_system        'tetragonal'
_space_group_IT_number             85
_space_group_name_H-M_alt          'P 4/n'
_space_group_name_Hall             '-P 4a'
loop_
  _space_group_symop_operation_xyz
 'x, y, z'
 '-x+1/2, -y+1/2, z'
 '-y+1/2, x, z'
 'y, -x+1/2, z'
 '-x, -y, -z'
 'x-1/2, y-1/2, -z'
 'y-1/2, -x, -z'
 '-y, x-1/2, -z'

_cell_length_a                     18.9040(14)
_cell_length_b                     18.9040
_cell_length_c                     12.3051(9)
_cell_angle_alpha                  90
_cell_angle_beta                   90
_cell_angle_gamma                  90
_cell_volume                       4397.4(7)
_cell_formula_units_Z              2
_cell_measurement_reflns_used      42710
_cell_measurement_temperature      173(2)
_cell_measurement_theta_max        25.994
_cell_measurement_theta_min        1.523
_shelx_estimated_absorpt_T_max     0.847
_shelx_estimated_absorpt_T_min     0.480
_exptl_absorpt_coefficient_mu      1.722
_exptl_absorpt_correction_T_max    0.7456
_exptl_absorpt_correction_T_min    0.5883
_exptl_absorpt_correction_type     multi-scan
_exptl_absorpt_process_details    
 'SADABS-2014/2 (Bruker,2014/2) was used for absorption correction. wR2(int) was 0.0928 before and 0.0591 after correction. The Ratio of minimum to maximum transmission is 0.7890. The \l/2 correction factor is 0.00150.'
_exptl_absorpt_special_details     ?
_exptl_crystal_colour              brown
_exptl_crystal_colour_primary      brown
_exptl_crystal_density_diffrn      1.549
_exptl_crystal_density_meas        ?
_exptl_crystal_density_method      ?
_exptl_crystal_description         plate
_exptl_crystal_F_000               2084
_exptl_crystal_size_max            0.5
_exptl_crystal_size_mid            0.44
_exptl_crystal_size_min            0.1
_exptl_transmission_factor_max     ?
_exptl_transmission_factor_min     ?
_diffrn_reflns_av_R_equivalents    0.0612
_diffrn_reflns_av_unetI/netI       0.0286
_diffrn_reflns_Laue_measured_fraction_full  1.000
_diffrn_reflns_Laue_measured_fraction_max  1.000
_diffrn_reflns_limit_h_max         23
_diffrn_reflns_limit_h_min         -23
_diffrn_reflns_limit_k_max         23
_diffrn_reflns_limit_k_min         -23
_diffrn_reflns_limit_l_max         15
_diffrn_reflns_limit_l_min         -15
_diffrn_reflns_number              42710
_diffrn_reflns_point_group_measured_fraction_full  1.000
_diffrn_reflns_point_group_measured_fraction_max  1.000
_diffrn_reflns_theta_full          25.994
_diffrn_reflns_theta_max           25.994
_diffrn_reflns_theta_min           1.523
_diffrn_ambient_temperature        173(2)
_diffrn_detector                   'CCD plate'
_diffrn_detector_area_resol_mean   7.9
_diffrn_detector_type              'Bruker SMART APEX2 area detector'
_diffrn_measured_fraction_theta_full  1.000
_diffrn_measured_fraction_theta_max  1.000
_diffrn_measurement_device         '\k-geometry diffractometer'
_diffrn_measurement_device_type    'Bruker SMART APEX2'
_diffrn_measurement_method         '\k-geometry diffractometry'
_diffrn_radiation_monochromator    graphite
_diffrn_radiation_probe            x-ray
_diffrn_radiation_type             MoK\a
_diffrn_radiation_wavelength       0.71073
_diffrn_source                     'fine-focus sealed tube'
_reflns_Friedel_coverage           0.000
_reflns_Friedel_fraction_full      .
_reflns_Friedel_fraction_max       .
_reflns_number_gt                  3891
_reflns_number_total               4332
_reflns_special_details
;
 Reflections were merged by SHELXL according to the crystal
 class for the calculation of statistics and refinement.
 
 _reflns_Friedel_fraction is defined as the number of unique
 Friedel pairs measured divided by the number that would be
 possible theoretically, ignoring centric projections and
 systematic absences.
;
_reflns_threshold_expression       'I > 2\s(I)'
_computing_cell_refinement         ?
_computing_data_collection         ?
_computing_data_reduction          ?
_computing_molecular_graphics      'Olex2 (Dolomanov et al., 2009)'
_computing_publication_material    'Olex2 (Dolomanov et al., 2009)'
_computing_structure_refinement    'ShelXL (Sheldrick, 2015)'
_computing_structure_solution      'ShelXT (Sheldrick, 2015)'
_refine_diff_density_max           0.702
_refine_diff_density_min           -1.294
_refine_diff_density_rms           0.118
_refine_ls_extinction_coef         .
_refine_ls_extinction_method       none
_refine_ls_goodness_of_fit_ref     1.283
_refine_ls_hydrogen_treatment      constr
_refine_ls_matrix_type             full
_refine_ls_number_parameters       453
_refine_ls_number_reflns           4332
_refine_ls_number_restraints       196
_refine_ls_R_factor_all            0.0546
_refine_ls_R_factor_gt             0.0473
_refine_ls_restrained_S_all        1.262
_refine_ls_shift/su_max            0.000
_refine_ls_shift/su_mean           0.000
_refine_ls_structure_factor_coef   Fsqd
_refine_ls_weighting_details      
 'w=1/[\s^2^(Fo^2^)+(0.0307P)^2^+22.7371P] where P=(Fo^2^+2Fc^2^)/3'
_refine_ls_weighting_scheme        calc
_refine_ls_wR_factor_gt            0.1271
_refine_ls_wR_factor_ref           0.1306
_refine_special_details            ?
_olex2_refinement_description
;
1. Fixed Uiso
 At 1.2 times of:
  All C(H) groups, All C(H,H) groups, All C(H,H,H,H) groups
 At 1.5 times of:
  All C(H,H,H) groups
2. Restrained distances
 Cl4-Cl3
 2.9 with sigma of 0.02
 Cl3-C18 = Cl4-C18
 1.77 with sigma of 0.01
 C13-C14 \\sim C14-C15 \\sim C15-C16 \\sim C14-C15B \\sim C15B-C16B
 with sigma of 0.02
 C9-C10 \\sim C9-C11 \\sim C9-C12 \\sim C9B-C10B \\sim C9B-C11B \\sim C9B-C12B
 with sigma of 0.02
3. Uiso/Uaniso restraints and constraints
C9B \\sim C9: within 1.7A with sigma of 0.02 and sigma for terminal atoms of
0.04
C6B \\sim C6: within 1.7A with sigma of 0.01 and sigma for terminal atoms of
0.02
Uanis(C16) \\sim Ueq, Uanis(C15) \\sim Ueq: with sigma of 0.01 and sigma for
terminal atoms of 0.02
Uanis(C18) \\sim Ueq: with sigma of 0.01 and sigma for terminal atoms of 0.02
Uanis(O2B) \\sim Ueq, Uanis(O1B) \\sim Ueq: with sigma of 0.007 and sigma for
terminal atoms of 0.01
Uanis(C11B) \\sim Ueq, Uanis(C11) \\sim Ueq, Uanis(C10B) \\sim Ueq, Uanis(C10)
\\sim Ueq, Uanis(C12B) \\sim Ueq, Uanis(C12) \\sim Ueq, Uanis(C9B) \\sim Ueq,
Uanis(C9) \\sim Ueq: with sigma of 0.01 and sigma for terminal atoms of 0.02
Uanis(C6B) \\sim Ueq, Uanis(C6) \\sim Ueq, Uanis(C1B) \\sim Ueq, Uanis(C5)
\\sim Ueq, Uanis(C2B) \\sim Ueq, Uanis(C4) \\sim Ueq, Uanis(C3B) \\sim Ueq,
Uanis(C3) \\sim Ueq, Uanis(C4B) \\sim Ueq, Uanis(C2) \\sim Ueq, Uanis(C5B)
\\sim Ueq, Uanis(C1) \\sim Ueq: with sigma of 0.01 and sigma for terminal atoms
of 0.02
Uanis(C7B) \\sim Ueq, Uanis(O2B) \\sim Ueq, Uanis(O1B) \\sim Ueq: with sigma of
0.01 and sigma for terminal atoms of 0.02
Uanis(Cl3) = Uanis(Cl4)
Uanis(N1) = Uanis(N1B)
4. Others
 Sof(Mn1B)=Sof(O1B)=Sof(O2B)=Sof(O3B)=Sof(O4B)=Sof(O5B)=Sof(N1B)=Sof(C1B)=
 Sof(C2B)=Sof(H2B)=Sof(C3B)=Sof(H3B)=Sof(C4B)=Sof(H4B)=Sof(C5B)=Sof(H5B)=
 Sof(C6B)=Sof(C7B)=Sof(C8B)=Sof(C9B)=Sof(C10B)=Sof(H10D)=Sof(H10E)=Sof(H10F)=
 Sof(C11B)=Sof(H11D)=Sof(H11E)=Sof(H11F)=Sof(C12B)=Sof(H12D)=Sof(H12E)=
 Sof(H12F)=1-FVAR(1)
 Sof(Mn1)=Sof(O1)=Sof(O2)=Sof(O3)=Sof(O4)=Sof(O5)=Sof(N1)=Sof(C1)=Sof(C2)=
 Sof(H2)=Sof(C3)=Sof(H3)=Sof(C4)=Sof(H4)=Sof(C5)=Sof(H5)=Sof(C6)=Sof(C7)=
 Sof(C8)=Sof(C9)=Sof(C10)=Sof(H10A)=Sof(H10B)=Sof(H10C)=Sof(C11)=Sof(H11A)=
 Sof(H11B)=Sof(H11C)=Sof(C12)=Sof(H12A)=Sof(H12B)=Sof(H12C)=FVAR(1)
 Fixed Sof: H14A(0.6) H14B(0.6) H14C(0.4) H14D(0.4) C15(0.6) H15A(0.6)
 H15B(0.6) C16(0.6) H16A(0.6) H16B(0.6) H16C(0.6) Cl3(0.25) Cl4(0.25) C18(0.25)
 H18A(0.25) H18B(0.25) C16B(0.4) H16D(0.4) H16E(0.4) H16F(0.4) C15B(0.4)
 H15C(0.4) H15D(0.4)
5.a Secondary CH2 refined with riding coordinates:
 C17(H17A,H17B), C13(H13A,H13B), C14(H14A,H14B), C14(H14C,H14D), C15(H15A,
 H15B), C18(H18A,H18B), C15B(H15C,H15D)
5.b Aromatic/amide H refined with riding coordinates:
 C2(H2), C3(H3), C4(H4), C5(H5), C2B(H2B), C3B(H3B), C4B(H4B), C5B(H5B)
5.c Idealised Me refined as rotating group:
 C10(H10A,H10B,H10C), C11(H11A,H11B,H11C), C12(H12A,H12B,H12C), C10B(H10D,H10E,
 H10F), C11B(H11D,H11E,H11F), C12B(H12D,H12E,H12F), C16(H16A,H16B,H16C),
 C16B(H16D,H16E,H16F)
;
_atom_sites_solution_hydrogens     geom
_atom_sites_solution_primary       dual
_atom_sites_solution_secondary     ?
loop_
  _atom_site_label
  _atom_site_type_symbol
  _atom_site_fract_x
  _atom_site_fract_y
  _atom_site_fract_z
  _atom_site_U_iso_or_equiv
  _atom_site_adp_type
  _atom_site_occupancy
  _atom_site_site_symmetry_order
  _atom_site_calc_flag
  _atom_site_refinement_flags_posn
  _atom_site_refinement_flags_adp
  _atom_site_refinement_flags_occupancy
  _atom_site_disorder_assembly
  _atom_site_disorder_group
 Tb1 Tb 0.250000 0.250000 0.64755(4) 0.02049(15) Uani 1 4 d S T P . .
 Mn1 Mn 0.38180(4) 0.36309(5) 0.50210(8) 0.0194(3) Uani 0.803(2) 1 d . . . A 1
 O1 O 0.4128(2) 0.4479(2) 0.4457(4) 0.0283(10) Uani 0.803(2) 1 d . . . A 1
 O2 O 0.1896(2) 0.4654(2) 0.4591(4) 0.0239(10) Uani 0.803(2) 1 d . . . A 1
 O3 O 0.2305(2) 0.3473(2) 0.5228(4) 0.0194(9) Uani 0.803(2) 1 d . . . A 1
 O4 O 0.4141(2) 0.3807(2) 0.6619(4) 0.0299(11) Uani 0.803(2) 1 d . . . A 1
 O5 O 0.3186(2) 0.3334(2) 0.7372(4) 0.0263(10) Uani 0.803(2) 1 d . . . A 1
 N1 N 0.2835(3) 0.3970(5) 0.4991(8) 0.0154(14) Uani 0.803(2) 1 d . . . A 1
 C1 C 0.3775(5) 0.5091(4) 0.4320(5) 0.0183(14) Uani 0.803(2) 1 d . U . A 1
 C2 C 0.4197(5) 0.5693(6) 0.4088(8) 0.025(2) Uani 0.803(2) 1 d . U . A 1
 H2 H 0.469644 0.564758 0.404534 0.029 Uiso 0.803(2) 1 calc R . . A 1
 C3 C 0.3883(7) 0.6344(6) 0.3923(11) 0.030(3) Uani 0.803(2) 1 d . U . A 1
 H3 H 0.417100 0.674279 0.376353 0.036 Uiso 0.803(2) 1 calc R . . A 1
 C4 C 0.3155(7) 0.6424(6) 0.3986(11) 0.032(3) Uani 0.803(2) 1 d . U . A 1
 H4 H 0.294400 0.687427 0.387477 0.039 Uiso 0.803(2) 1 calc R . . A 1
 C5 C 0.2739(5) 0.5836(6) 0.4214(8) 0.027(2) Uani 0.803(2) 1 d . U . A 1
 H5 H 0.223953 0.588937 0.425612 0.033 Uiso 0.803(2) 1 calc R . . A 1
 C6 C 0.3037(6) 0.5172(4) 0.4381(6) 0.0195(16) Uani 0.803(2) 1 d . U . A 1
 C7 C 0.2570(3) 0.4582(3) 0.4656(5) 0.0215(13) Uani 0.803(2) 1 d . . . A 1
 C8 C 0.3809(3) 0.3567(3) 0.7407(6) 0.0271(15) Uani 0.803(2) 1 d . . . A 1
 C9 C 0.4198(4) 0.3556(5) 0.8516(7) 0.034(2) Uani 0.803(2) 1 d D U . A 1
 C10 C 0.3703(5) 0.3387(6) 0.9451(8) 0.045(2) Uani 0.803(2) 1 d D U . A 1
 H10A H 0.334291 0.375823 0.950971 0.067 Uiso 0.803(2) 1 calc GR . . A 1
 H10B H 0.397347 0.336247 1.012886 0.067 Uiso 0.803(2) 1 calc GR . . A 1
 H10C H 0.347180 0.293093 0.931774 0.067 Uiso 0.803(2) 1 calc GR . . A 1
 C11 C 0.4754(6) 0.2978(5) 0.8432(9) 0.055(3) Uani 0.803(2) 1 d D U . A 1
 H11A H 0.504512 0.297687 0.909154 0.082 Uiso 0.803(2) 1 calc GR . . A 1
 H11B H 0.505551 0.306618 0.779835 0.082 Uiso 0.803(2) 1 calc GR . . A 1
 H11C H 0.452110 0.251771 0.835278 0.082 Uiso 0.803(2) 1 calc GR . . A 1
 C12 C 0.4559(6) 0.4274(6) 0.8696(8) 0.056(3) Uani 0.803(2) 1 d D U . A 1
 H12A H 0.420260 0.464994 0.868833 0.084 Uiso 0.803(2) 1 calc GR . . A 1
 H12B H 0.490407 0.435752 0.811537 0.084 Uiso 0.803(2) 1 calc GR . . A 1
 H12C H 0.480219 0.427220 0.939979 0.084 Uiso 0.803(2) 1 calc GR . . A 1
 Mn1B Mn 0.19864(17) 0.41556(18) 0.4907(3) 0.0148(11) Uani 0.197(2) 1 d . . . A 2
 O1B O 0.2165(9) 0.5015(10) 0.4341(14) 0.019(4) Uani 0.197(2) 1 d . U . A 2
 O2B O 0.4154(8) 0.4016(10) 0.4518(14) 0.018(4) Uani 0.197(2) 1 d . U . A 2
 O3B O 0.1794(8) 0.3187(8) 0.5093(14) 0.019(4) Uani 0.197(2) 1 d . . . A 2
 O4B O 0.4469(10) 0.3181(10) 0.6511(15) 0.030(4) Uani 0.197(2) 1 d . . . A 2
 O5B O 0.3556(10) 0.2594(10) 0.7260(15) 0.030(4) Uani 0.197(2) 1 d . . . A 2
 N1B N 0.3034(17) 0.394(2) 0.490(4) 0.0154(14) Uani 0.197(2) 1 d . . . A 2
 C1B C 0.2802(18) 0.540(2) 0.426(2) 0.013(6) Uani 0.197(2) 1 d . U . A 2
 C2B C 0.278(2) 0.610(2) 0.405(3) 0.022(9) Uani 0.197(2) 1 d . U . A 2
 H2B H 0.232885 0.631575 0.393881 0.027 Uiso 0.197(2) 1 calc R . . A 2
 C3B C 0.338(3) 0.649(3) 0.398(4) 0.021(10) Uani 0.197(2) 1 d . U . A 2
 H3B H 0.333871 0.699221 0.390179 0.025 Uiso 0.197(2) 1 calc R . . A 2
 C4B C 0.403(2) 0.620(3) 0.403(4) 0.018(10) Uani 0.197(2) 1 d . U . A 2
 H4B H 0.444458 0.647318 0.393502 0.021 Uiso 0.197(2) 1 calc R . . A 2
 C5B C 0.4063(18) 0.548(2) 0.422(3) 0.011(8) Uani 0.197(2) 1 d . U . A 2
 H5B H 0.451141 0.525305 0.426602 0.014 Uiso 0.197(2) 1 calc R . . A 2
 C6B C 0.342(2) 0.5062(14) 0.436(2) 0.012(4) Uani 0.197(2) 1 d . U . A 2
 C7B C 0.3557(12) 0.4299(12) 0.4589(19) 0.017(5) Uani 0.197(2) 1 d . U . A 2
 C8B C 0.4119(12) 0.2999(12) 0.736(2) 0.022(5) Uani 0.197(2) 1 d . . . A 2
 C9B C 0.4337(14) 0.3301(14) 0.843(2) 0.013(6) Uani 0.197(2) 1 d D U . A 2
 C10B C 0.385(2) 0.306(2) 0.935(3) 0.051(11) Uani 0.197(2) 1 d D U . A 2
 H10D H 0.342693 0.335885 0.935566 0.076 Uiso 0.197(2) 1 calc GR . . A 2
 H10E H 0.410223 0.311135 1.004163 0.076 Uiso 0.197(2) 1 calc GR . . A 2
 H10F H 0.371902 0.256808 0.923649 0.076 Uiso 0.197(2) 1 calc GR . . A 2
 C11B C 0.5097(17) 0.307(2) 0.862(4) 0.046(9) Uani 0.197(2) 1 d D U . A 2
 H11D H 0.514515 0.256453 0.844151 0.069 Uiso 0.197(2) 1 calc GR . . A 2
 H11E H 0.522144 0.314334 0.938330 0.069 Uiso 0.197(2) 1 calc GR . . A 2
 H11F H 0.541541 0.334494 0.815583 0.069 Uiso 0.197(2) 1 calc GR . . A 2
 C12B C 0.435(2) 0.4103(16) 0.838(4) 0.049(10) Uani 0.197(2) 1 d D U . A 2
 H12D H 0.466543 0.425485 0.778686 0.074 Uiso 0.197(2) 1 calc GR . . A 2
 H12E H 0.452478 0.429115 0.906812 0.074 Uiso 0.197(2) 1 calc GR . . A 2
 H12F H 0.387227 0.428097 0.823969 0.074 Uiso 0.197(2) 1 calc GR . . A 2
 Cl1 Cl 0.09651(14) 0.65345(11) 0.28810(19) 0.0741(6) Uani 1 1 d . . . . .
 Cl2 Cl 0.11129(15) 0.51567(15) 0.1893(2) 0.0895(8) Uani 1 1 d . . . . .
 C17 C 0.0834(4) 0.5617(4) 0.3032(6) 0.0502(17) Uani 1 1 d . . . . .
 H17A H 0.109848 0.544759 0.367561 0.060 Uiso 1 1 calc R . . . .
 H17B H 0.032505 0.552215 0.315683 0.060 Uiso 1 1 calc R . . . .
 N2 N 0.250000 0.750000 0.000000 0.067(4) Uani 1 4 d S T P . .
 C13 C 0.1929(5) 0.7225(5) -0.0753(7) 0.079(3) Uani 1 1 d D . . . .
 H13A H 0.176952 0.762155 -0.121687 0.094 Uiso 1 1 calc R . . . .
 H13B H 0.214474 0.686632 -0.123670 0.094 Uiso 1 1 calc R . . . .
 C14 C 0.1290(5) 0.6901(6) -0.0233(9) 0.093(3) Uani 1 1 d D . . . .
 H14A H 0.106074 0.723094 0.028366 0.111 Uiso 0.6 1 calc R . . B 1
 H14B H 0.140605 0.645381 0.014474 0.111 Uiso 0.6 1 calc R . . B 1
 H14C H 0.104953 0.728902 0.016224 0.111 Uiso 0.4 1 calc R . . C 2
 H14D H 0.146941 0.657147 0.032752 0.111 Uiso 0.4 1 calc R . . C 2
 C15 C 0.0827(8) 0.6772(10) -0.1243(12) 0.067(4) Uani 0.6 1 d D U . D 1
 H15A H 0.074553 0.722216 -0.163443 0.080 Uiso 0.6 1 calc R . . D 1
 H15B H 0.106437 0.643742 -0.174240 0.080 Uiso 0.6 1 calc R . . D 1
 C16 C 0.0137(9) 0.6469(9) -0.0861(16) 0.082(5) Uani 0.6 1 d D U . D 1
 H16A H -0.019725 0.645305 -0.146959 0.124 Uiso 0.6 1 calc GR . . D 1
 H16B H -0.005697 0.676771 -0.028160 0.124 Uiso 0.6 1 calc GR . . D 1
 H16C H 0.021361 0.598986 -0.058265 0.124 Uiso 0.6 1 calc GR . . D 1
 Cl3 Cl 0.3426(13) 0.295(2) 0.251(2) 0.218(9) Uani 0.25 1 d D . . E -1
 Cl4 Cl 0.1917(9) 0.330(3) 0.241(2) 0.218(9) Uani 0.25 1 d D . . E -1
 C18 C 0.255(2) 0.2617(14) 0.258(3) 0.163(16) Uani 0.25 1 d D U . E -1
 H18A H 0.248191 0.225470 0.201003 0.195 Uiso 0.25 1 calc R . . E -1
 H18B H 0.247705 0.238656 0.329534 0.195 Uiso 0.25 1 calc R . . E -1
 C16B C 0.0211(15) 0.7028(13) -0.1327(19) 0.079(7) Uani 0.4 1 d D . . D 2
 H16D H -0.015009 0.677706 -0.174986 0.119 Uiso 0.4 1 calc GR . . D 2
 H16E H 0.047186 0.735028 -0.180455 0.119 Uiso 0.4 1 calc GR . . D 2
 H16F H -0.001769 0.729910 -0.074644 0.119 Uiso 0.4 1 calc GR . . D 2
 C15B C 0.0712(11) 0.6504(11) -0.084(2) 0.076(8) Uani 0.4 1 d D . . D 2
 H15C H 0.092401 0.620919 -0.141964 0.092 Uiso 0.4 1 calc R . . D 2
 H15D H 0.045476 0.618864 -0.033311 0.092 Uiso 0.4 1 calc R . . D 2

loop_
  _atom_site_aniso_label
  _atom_site_aniso_U_11
  _atom_site_aniso_U_22
  _atom_site_aniso_U_33
  _atom_site_aniso_U_23
  _atom_site_aniso_U_13
  _atom_site_aniso_U_12
 Tb1 0.01621(17) 0.01621(17) 0.0291(3) 0.000 0.000 0.000
 Mn1 0.0131(4) 0.0133(5) 0.0318(6) 0.0035(4) 0.0014(4) -0.0005(3)
 O1 0.018(2) 0.019(2) 0.048(3) 0.006(2) 0.002(2) -0.0020(18)
 O2 0.014(2) 0.017(2) 0.041(3) 0.005(2) -0.0033(19) -0.0003(18)
 O3 0.014(2) 0.0133(19) 0.031(2) 0.0047(17) -0.0006(17) -0.0039(16)
 O4 0.027(2) 0.033(2) 0.030(3) 0.004(2) -0.005(2) -0.0070(19)
 O5 0.021(2) 0.028(2) 0.030(2) -0.0043(19) -0.0032(19) -0.0024(18)
 N1 0.007(4) 0.013(2) 0.027(3) 0.0039(19) 0.000(3) -0.004(3)
 C1 0.021(3) 0.013(3) 0.021(3) 0.000(2) -0.001(3) -0.001(3)
 C2 0.021(4) 0.023(5) 0.029(4) 0.004(3) 0.006(3) -0.009(4)
 C3 0.034(7) 0.016(5) 0.040(5) 0.002(4) 0.000(4) -0.006(4)
 C4 0.034(6) 0.018(4) 0.044(5) 0.003(3) 0.001(5) 0.003(5)
 C5 0.023(4) 0.024(5) 0.035(4) 0.003(4) -0.001(3) 0.001(4)
 C6 0.019(4) 0.015(3) 0.025(3) -0.001(3) 0.000(3) -0.002(3)
 C7 0.021(3) 0.019(3) 0.024(3) -0.001(2) 0.002(2) -0.001(2)
 C8 0.025(3) 0.017(3) 0.039(4) -0.003(3) -0.007(3) -0.003(2)
 C9 0.031(4) 0.035(5) 0.036(4) 0.003(4) -0.011(3) -0.005(4)
 C10 0.041(5) 0.057(6) 0.035(5) 0.005(5) -0.003(4) -0.007(5)
 C11 0.039(5) 0.069(6) 0.057(6) 0.026(5) -0.006(5) 0.003(5)
 C12 0.065(6) 0.061(6) 0.041(6) 0.007(4) -0.024(5) -0.032(5)
 Mn1B 0.0091(17) 0.009(2) 0.026(2) 0.0034(15) -0.0031(14) -0.0016(13)
 O1B 0.013(6) 0.020(6) 0.025(6) 0.004(5) -0.002(5) 0.010(5)
 O2B 0.012(6) 0.017(6) 0.026(6) -0.005(5) 0.000(5) 0.000(5)
 O3B 0.016(8) 0.011(7) 0.031(10) 0.001(7) -0.003(7) 0.002(6)
 O4B 0.026(9) 0.039(11) 0.024(10) 0.004(9) -0.001(8) -0.017(8)
 O5B 0.029(10) 0.038(11) 0.022(9) 0.003(8) -0.005(8) -0.009(8)
 N1B 0.007(4) 0.013(2) 0.027(3) 0.0039(19) 0.000(3) -0.004(3)
 C1B 0.013(10) 0.011(10) 0.014(9) 0.005(8) -0.004(7) -0.002(8)
 C2B 0.019(11) 0.024(12) 0.024(11) 0.003(9) -0.001(8) 0.003(9)
 C3B 0.019(13) 0.019(12) 0.026(12) 0.002(8) -0.002(9) -0.001(10)
 C4B 0.011(12) 0.018(14) 0.024(12) 0.000(9) -0.004(8) -0.003(9)
 C5B 0.008(11) 0.009(11) 0.017(10) 0.008(8) 0.006(8) 0.002(8)
 C6B 0.011(8) 0.008(7) 0.018(7) 0.001(6) 0.000(7) -0.004(7)
 C7B 0.019(8) 0.020(8) 0.013(8) 0.001(7) -0.002(7) 0.003(7)
 C8B 0.017(11) 0.008(10) 0.041(16) 0.002(10) -0.010(11) -0.003(9)
 C9B 0.013(9) 0.007(9) 0.018(8) -0.005(8) -0.001(7) 0.003(7)
 C10B 0.049(18) 0.062(19) 0.041(17) -0.008(16) -0.006(14) -0.003(15)
 C11B 0.035(15) 0.048(16) 0.055(17) 0.002(14) -0.014(15) 0.004(14)
 C12B 0.056(18) 0.046(18) 0.044(17) 0.003(14) -0.010(15) 0.004(15)
 Cl1 0.1057(18) 0.0562(12) 0.0605(13) 0.0100(10) 0.0037(12) 0.0087(11)
 Cl2 0.1038(19) 0.0908(17) 0.0738(15) -0.0253(13) -0.0013(14) 0.0338(15)
 C17 0.048(4) 0.055(4) 0.048(4) -0.003(3) -0.010(3) 0.006(3)
 N2 0.078(6) 0.078(6) 0.044(7) 0.000 0.000 0.000
 C13 0.090(7) 0.094(7) 0.052(5) -0.013(5) -0.008(5) 0.022(6)
 C14 0.071(6) 0.115(9) 0.092(8) -0.042(7) 0.000(6) 0.011(6)
 C15 0.076(8) 0.062(8) 0.062(8) -0.003(6) 0.004(7) -0.003(7)
 C16 0.073(10) 0.079(10) 0.095(11) -0.035(9) 0.014(9) 0.001(8)
 Cl3 0.127(12) 0.45(3) 0.080(6) 0.097(11) 0.004(7) 0.051(19)
 Cl4 0.127(12) 0.45(3) 0.080(6) 0.097(11) 0.004(7) 0.051(19)
 C18 0.163(18) 0.163(18) 0.162(18) -0.003(10) -0.001(11) 0.000(11)
 C16B 0.11(2) 0.074(16) 0.058(14) -0.012(12) -0.004(13) -0.008(15)
 C15B 0.09(2) 0.059(15) 0.083(19) -0.002(13) 0.025(16) -0.012(13)

_geom_special_details
;
 All esds (except the esd in the dihedral angle between two l.s. planes)
 are estimated using the full covariance matrix.  The cell esds are taken
 into account individually in the estimation of esds in distances, angles
 and torsion angles; correlations between esds in cell parameters are only
 used when they are defined by crystal symmetry.  An approximate (isotropic)
 treatment of cell esds is used for estimating esds involving l.s. planes.
;
loop_
  _geom_bond_atom_site_label_1
  _geom_bond_atom_site_label_2
  _geom_bond_distance
  _geom_bond_site_symmetry_2
  _geom_bond_publ_flag
 Tb1 O3 2.424(4) 4 ?
 Tb1 O3 2.424(4) 2 ?
 Tb1 O3 2.424(4) 3 ?
 Tb1 O3 2.424(4) . ?
 Tb1 O5 2.320(4) 2 ?
 Tb1 O5 2.320(4) . ?
 Tb1 O5 2.320(4) 3 ?
 Tb1 O5 2.320(4) 4 ?
 Tb1 O5B 2.224(18) . ?
 Tb1 O5B 2.224(18) 4 ?
 Tb1 O5B 2.224(18) 3 ?
 Tb1 O5B 2.224(18) 2 ?
 Mn1 O1 1.843(5) . ?
 Mn1 O2 1.941(5) 4 ?
 Mn1 O3 1.903(4) 4 ?
 Mn1 O4 2.086(5) . ?
 Mn1 N1 1.965(5) . ?
 O1 C1 1.346(8) . ?
 O2 C7 1.284(7) . ?
 O3 N1 1.405(8) . ?
 O4 C8 1.240(8) . ?
 O5 C8 1.258(8) . ?
 N1 C7 1.327(10) . ?
 C1 C2 1.418(10) . ?
 C1 C6 1.407(11) . ?
 C2 H2 0.9500 . ?
 C2 C3 1.381(15) . ?
 C3 H3 0.9500 . ?
 C3 C4 1.387(17) . ?
 C4 H4 0.9500 . ?
 C4 C5 1.390(15) . ?
 C5 H5 0.9500 . ?
 C5 C6 1.391(12) . ?
 C6 C7 1.462(9) . ?
 C8 C9 1.550(11) . ?
 C9 C10 1.517(10) . ?
 C9 C11 1.521(10) . ?
 C9 C12 1.536(10) . ?
 C10 H10A 0.9800 . ?
 C10 H10B 0.9800 . ?
 C10 H10C 0.9800 . ?
 C11 H11A 0.9800 . ?
 C11 H11B 0.9800 . ?
 C11 H11C 0.9800 . ?
 C12 H12A 0.9800 . ?
 C12 H12B 0.9800 . ?
 C12 H12C 0.9800 . ?
 Mn1B O1B 1.80(2) . ?
 Mn1B O2B 1.95(2) 3 ?
 Mn1B O3B 1.882(16) . ?
 Mn1B O4B 2.085(19) 3 ?
 Mn1B N1B 2.02(3) . ?
 O1B C1B 1.41(3) . ?
 O2B C7B 1.25(3) . ?
 O3B N1B 1.44(5) 3 ?
 O4B C8B 1.29(3) . ?
 O5B C8B 1.32(3) . ?
 N1B C7B 1.26(5) . ?
 C1B C2B 1.34(4) . ?
 C1B C6B 1.34(4) . ?
 C2B H2B 0.9500 . ?
 C2B C3B 1.37(5) . ?
 C3B H3B 0.9500 . ?
 C3B C4B 1.35(6) . ?
 C4B H4B 0.9500 . ?
 C4B C5B 1.38(6) . ?
 C5B H5B 0.9500 . ?
 C5B C6B 1.45(4) . ?
 C6B C7B 1.49(4) . ?
 C8B C9B 1.48(4) . ?
 C9B C10B 1.524(17) . ?
 C9B C11B 1.523(16) . ?
 C9B C12B 1.517(17) . ?
 C10B H10D 0.9800 . ?
 C10B H10E 0.9800 . ?
 C10B H10F 0.9800 . ?
 C11B H11D 0.9800 . ?
 C11B H11E 0.9800 . ?
 C11B H11F 0.9800 . ?
 C12B H12D 0.9800 . ?
 C12B H12E 0.9800 . ?
 C12B H12F 0.9800 . ?
 Cl1 C17 1.763(7) . ?
 Cl2 C17 1.731(7) . ?
 C17 H17A 0.9900 . ?
 C17 H17B 0.9900 . ?
 N2 C13 1.514(9) 7_565 ?
 N2 C13 1.514(9) 8_665 ?
 N2 C13 1.514(9) 2_565 ?
 N2 C13 1.514(9) . ?
 C13 H13A 0.9900 . ?
 C13 H13B 0.9900 . ?
 C13 C14 1.498(11) . ?
 C14 H14A 0.9900 . ?
 C14 H14B 0.9900 . ?
 C14 H14C 0.9900 . ?
 C14 H14D 0.9900 . ?
 C14 C15 1.539(13) . ?
 C14 C15B 1.522(15) . ?
 C15 H15A 0.9900 . ?
 C15 H15B 0.9900 . ?
 C15 C16 1.500(14) . ?
 C16 H16A 0.9800 . ?
 C16 H16B 0.9800 . ?
 C16 H16C 0.9800 . ?
 Cl3 C18 1.771(11) . ?
 Cl4 C18 1.771(11) . ?
 C18 H18A 0.9900 . ?
 C18 H18B 0.9900 . ?
 C16B H16D 0.9800 . ?
 C16B H16E 0.9800 . ?
 C16B H16F 0.9800 . ?
 C16B C15B 1.496(16) . ?
 C15B H15C 0.9900 . ?
 C15B H15D 0.9900 . ?

loop_
  _geom_angle_atom_site_label_1
  _geom_angle_atom_site_label_2
  _geom_angle_atom_site_label_3
  _geom_angle
  _geom_angle_site_symmetry_1
  _geom_angle_site_symmetry_3
  _geom_angle_publ_flag
 O3 Tb1 O3 66.33(11) . 3 ?
 O3 Tb1 O3 66.33(11) 3 2 ?
 O3 Tb1 O3 101.4(2) . 2 ?
 O3 Tb1 O3 66.33(11) . 4 ?
 O3 Tb1 O3 66.33(11) 2 4 ?
 O3 Tb1 O3 101.4(2) 3 4 ?
 O5 Tb1 O3 82.59(15) 3 3 ?
 O5 Tb1 O3 76.94(15) . 4 ?
 O5 Tb1 O3 137.02(14) 4 3 ?
 O5 Tb1 O3 82.59(15) . . ?
 O5 Tb1 O3 82.59(15) 4 4 ?
 O5 Tb1 O3 137.02(14) . 2 ?
 O5 Tb1 O3 76.94(15) 2 3 ?
 O5 Tb1 O3 137.02(14) 2 . ?
 O5 Tb1 O3 145.95(14) 2 4 ?
 O5 Tb1 O3 145.96(14) 4 . ?
 O5 Tb1 O3 137.02(14) 3 4 ?
 O5 Tb1 O3 145.95(14) 3 2 ?
 O5 Tb1 O3 145.95(14) . 3 ?
 O5 Tb1 O3 82.59(15) 2 2 ?
 O5 Tb1 O3 76.94(15) 4 2 ?
 O5 Tb1 O3 76.94(15) 3 . ?
 O5 Tb1 O5 76.93(10) 2 3 ?
 O5 Tb1 O5 76.93(10) . 3 ?
 O5 Tb1 O5 76.93(10) 2 4 ?
 O5 Tb1 O5 123.2(2) 4 3 ?
 O5 Tb1 O5 123.2(2) . 2 ?
 O5 Tb1 O5 76.93(10) . 4 ?
 O5B Tb1 O3 65.3(5) 2 3 ?
 O5B Tb1 O3 110.5(5) 3 3 ?
 O5B Tb1 O3 101.5(5) . 2 ?
 O5B Tb1 O3 101.5(5) 4 3 ?
 O5B Tb1 O3 65.3(5) 4 2 ?
 O5B Tb1 O3 165.4(5) . 3 ?
 O5B Tb1 O3 165.4(5) 3 2 ?
 O5B Tb1 O3 110.5(5) 2 2 ?
 O5B Tb1 O5 40.3(5) 2 2 ?
 O5B Tb1 O5 39.5(5) 2 3 ?
 O5B Tb1 O5 39.5(5) . 4 ?
 O5B Tb1 O5 39.5(5) 4 2 ?
 O5B Tb1 O5 111.0(5) . 3 ?
 O5B Tb1 O5 110.4(5) . 2 ?
 O5B Tb1 O5 40.3(5) 3 3 ?
 O5B Tb1 O5 110.4(5) 3 4 ?
 O5B Tb1 O5 110.4(5) 4 3 ?
 O5B Tb1 O5 111.0(5) 3 2 ?
 O5B Tb1 O5 40.3(5) 4 4 ?
 O5B Tb1 O5 111.0(5) 2 4 ?
 O5B Tb1 O5B 128.5(10) 2 . ?
 O5B Tb1 O5B 79.1(4) 3 2 ?
 O5B Tb1 O5B 128.5(10) 3 4 ?
 O5B Tb1 O5B 79.1(4) 4 . ?
 O5B Tb1 O5B 79.1(4) 3 . ?
 O5B Tb1 O5B 79.1(4) 2 4 ?
 O1 Mn1 O2 94.86(19) . 4 ?
 O1 Mn1 O3 165.5(2) . 4 ?
 O1 Mn1 O4 97.1(2) . . ?
 O1 Mn1 N1 90.6(3) . . ?
 O2 Mn1 O4 95.8(2) 4 . ?
 O2 Mn1 N1 158.7(3) 4 . ?
 O3 Mn1 O2 80.72(17) 4 4 ?
 O3 Mn1 O4 97.03(19) 4 . ?
 O3 Mn1 N1 88.9(3) 4 . ?
 N1 Mn1 O4 104.0(3) . . ?
 C1 O1 Mn1 129.6(5) . . ?
 C7 O2 Mn1 114.0(4) . 3 ?
 Mn1 O3 Tb1 119.09(18) 3 . ?
 N1 O3 Tb1 122.0(4) . . ?
 N1 O3 Mn1 114.0(4) . 3 ?
 C8 O4 Mn1 122.1(4) . . ?
 C8 O5 Tb1 141.0(4) . . ?
 O3 N1 Mn1 116.9(5) . . ?
 C7 N1 Mn1 130.4(5) . . ?
 C7 N1 O3 112.2(5) . . ?
 O1 C1 C2 115.8(8) . . ?
 O1 C1 C6 125.4(8) . . ?
 C6 C1 C2 118.8(7) . . ?
 C1 C2 H2 119.9 . . ?
 C3 C2 C1 120.2(9) . . ?
 C3 C2 H2 119.9 . . ?
 C2 C3 H3 119.5 . . ?
 C2 C3 C4 121.0(11) . . ?
 C4 C3 H3 119.5 . . ?
 C3 C4 H4 120.5 . . ?
 C3 C4 C5 119.1(11) . . ?
 C5 C4 H4 120.5 . . ?
 C4 C5 H5 119.3 . . ?
 C6 C5 C4 121.4(9) . . ?
 C6 C5 H5 119.3 . . ?
 C1 C6 C7 121.9(9) . . ?
 C5 C6 C1 119.5(7) . . ?
 C5 C6 C7 118.6(10) . . ?
 O2 C7 N1 119.1(6) . . ?
 O2 C7 C6 120.3(7) . . ?
 N1 C7 C6 120.6(7) . . ?
 O4 C8 O5 125.1(6) . . ?
 O4 C8 C9 116.9(6) . . ?
 O5 C8 C9 118.0(6) . . ?
 C10 C9 C8 112.2(7) . . ?
 C10 C9 C11 109.1(8) . . ?
 C10 C9 C12 110.6(8) . . ?
 C11 C9 C8 106.2(8) . . ?
 C11 C9 C12 109.7(8) . . ?
 C12 C9 C8 109.1(7) . . ?
 C9 C10 H10A 109.5 . . ?
 C9 C10 H10B 109.5 . . ?
 C9 C10 H10C 109.5 . . ?
 H10A C10 H10B 109.5 . . ?
 H10A C10 H10C 109.5 . . ?
 H10B C10 H10C 109.5 . . ?
 C9 C11 H11A 109.5 . . ?
 C9 C11 H11B 109.5 . . ?
 C9 C11 H11C 109.5 . . ?
 H11A C11 H11B 109.5 . . ?
 H11A C11 H11C 109.5 . . ?
 H11B C11 H11C 109.5 . . ?
 C9 C12 H12A 109.5 . . ?
 C9 C12 H12B 109.5 . . ?
 C9 C12 H12C 109.5 . . ?
 H12A C12 H12B 109.5 . . ?
 H12A C12 H12C 109.5 . . ?
 H12B C12 H12C 109.5 . . ?
 O1B Mn1B O3B 164.2(8) . . ?
 O1B Mn1B N1B 89.8(14) . . ?
 O2B Mn1B N1B 161.5(15) 3 . ?
 O3B Mn1B N1B 89.6(14) . . ?
 C1B O1B Mn1B 131(2) . . ?
 C7B O2B Mn1B 113.5(16) . 4 ?
 Mn1B O3B Tb1 118.7(8) . . ?
 N1B O3B Tb1 121.3(17) 3 . ?
 N1B O3B Mn1B 111.2(16) 3 . ?
 C8B O4B Mn1B 125.9(15) . 4 ?
 C8B O5B Tb1 144.5(17) . . ?
 O3B N1B Mn1B 113(2) 4 . ?
 C7B N1B Mn1B 131(3) . . ?
 C7B N1B O3B 114(3) . 4 ?
 C2B C1B O1B 119(4) . . ?
 C2B C1B C6B 121(3) . . ?
 C6B C1B O1B 120(4) . . ?
 C1B C2B H2B 119.4 . . ?
 C1B C2B C3B 121(5) . . ?
 C3B C2B H2B 119.4 . . ?
 C2B C3B H3B 119.1 . . ?
 C4B C3B C2B 122(5) . . ?
 C4B C3B H3B 119.1 . . ?
 C3B C4B H4B 121.4 . . ?
 C3B C4B C5B 117(4) . . ?
 C5B C4B H4B 121.4 . . ?
 C4B C5B H5B 119.5 . . ?
 C4B C5B C6B 121(3) . . ?
 C6B C5B H5B 119.5 . . ?
 C1B C6B C5B 117(3) . . ?
 C1B C6B C7B 129(3) . . ?
 C5B C6B C7B 114(4) . . ?
 O2B C7B N1B 120(3) . . ?
 O2B C7B C6B 123(3) . . ?
 N1B C7B C6B 117(3) . . ?
 O4B C8B O5B 119(2) . . ?
 O4B C8B C9B 118(2) . . ?
 O5B C8B C9B 122(2) . . ?
 C8B C9B C10B 112(3) . . ?
 C8B C9B C11B 107(2) . . ?
 C8B C9B C12B 111(3) . . ?
 C11B C9B C10B 111(3) . . ?
 C12B C9B C10B 110(3) . . ?
 C12B C9B C11B 106(3) . . ?
 C9B C10B H10D 109.5 . . ?
 C9B C10B H10E 109.5 . . ?
 C9B C10B H10F 109.5 . . ?
 H10D C10B H10E 109.5 . . ?
 H10D C10B H10F 109.5 . . ?
 H10E C10B H10F 109.5 . . ?
 C9B C11B H11D 109.5 . . ?
 C9B C11B H11E 109.5 . . ?
 C9B C11B H11F 109.5 . . ?
 H11D C11B H11E 109.5 . . ?
 H11D C11B H11F 109.5 . . ?
 H11E C11B H11F 109.5 . . ?
 C9B C12B H12D 109.5 . . ?
 C9B C12B H12E 109.5 . . ?
 C9B C12B H12F 109.5 . . ?
 H12D C12B H12E 109.5 . . ?
 H12D C12B H12F 109.5 . . ?
 H12E C12B H12F 109.5 . . ?
 Cl1 C17 H17A 109.3 . . ?
 Cl1 C17 H17B 109.3 . . ?
 Cl2 C17 Cl1 111.5(4) . . ?
 Cl2 C17 H17A 109.3 . . ?
 Cl2 C17 H17B 109.3 . . ?
 H17A C17 H17B 108.0 . . ?
 C13 N2 C13 104.6(7) 7_565 8_665 ?
 C13 N2 C13 112.0(4) 7_565 2_565 ?
 C13 N2 C13 112.0(4) . 8_665 ?
 C13 N2 C13 104.6(7) . 2_565 ?
 C13 N2 C13 112.0(4) . 7_565 ?
 C13 N2 C13 112.0(4) 2_565 8_665 ?
 N2 C13 H13A 108.0 . . ?
 N2 C13 H13B 108.0 . . ?
 H13A C13 H13B 107.3 . . ?
 C14 C13 N2 117.0(7) . . ?
 C14 C13 H13A 108.0 . . ?
 C14 C13 H13B 108.0 . . ?
 C13 C14 H14A 111.7 . . ?
 C13 C14 H14B 111.7 . . ?
 C13 C14 H14C 106.1 . . ?
 C13 C14 H14D 106.1 . . ?
 C13 C14 C15 100.3(10) . . ?
 C13 C14 C15B 124.9(14) . . ?
 H14A C14 H14B 109.5 . . ?
 H14C C14 H14D 106.3 . . ?
 C15 C14 H14A 111.7 . . ?
 C15 C14 H14B 111.7 . . ?
 C15B C14 H14C 106.1 . . ?
 C15B C14 H14D 106.1 . . ?
 C14 C15 H15A 110.2 . . ?
 C14 C15 H15B 110.2 . . ?
 H15A C15 H15B 108.5 . . ?
 C16 C15 C14 107.6(13) . . ?
 C16 C15 H15A 110.2 . . ?
 C16 C15 H15B 110.2 . . ?
 C15 C16 H16A 109.5 . . ?
 C15 C16 H16B 109.5 . . ?
 C15 C16 H16C 109.5 . . ?
 H16A C16 H16B 109.5 . . ?
 H16A C16 H16C 109.5 . . ?
 H16B C16 H16C 109.5 . . ?
 Cl3 C18 H18A 109.3 . . ?
 Cl3 C18 H18B 109.3 . . ?
 Cl4 C18 Cl3 111.8(13) . . ?
 Cl4 C18 H18A 109.3 . . ?
 Cl4 C18 H18B 109.3 . . ?
 H18A C18 H18B 107.9 . . ?
 H16D C16B H16E 109.5 . . ?
 H16D C16B H16F 109.5 . . ?
 H16E C16B H16F 109.5 . . ?
 C15B C16B H16D 109.5 . . ?
 C15B C16B H16E 109.5 . . ?
 C15B C16B H16F 109.5 . . ?
 C14 C15B H15C 109.9 . . ?
 C14 C15B H15D 109.9 . . ?
 C16B C15B C14 108.9(17) . . ?
 C16B C15B H15C 109.9 . . ?
 C16B C15B H15D 109.9 . . ?
 H15C C15B H15D 108.3 . . ?

loop_
  _geom_torsion_atom_site_label_1
  _geom_torsion_atom_site_label_2
  _geom_torsion_atom_site_label_3
  _geom_torsion_atom_site_label_4
  _geom_torsion
  _geom_torsion_site_symmetry_1
  _geom_torsion_site_symmetry_2
  _geom_torsion_site_symmetry_3
  _geom_torsion_site_symmetry_4
  _geom_torsion_publ_flag
 Tb1 O3 N1 Mn1 31.8(8) . . . . ?
 Tb1 O3 N1 C7 -155.7(5) . . . . ?
 Tb1 O5 C8 O4 56.0(10) . . . . ?
 Tb1 O5 C8 C9 -123.9(7) . . . . ?
 Tb1 O5B C8B O4B -58(4) . . . . ?
 Tb1 O5B C8B C9B 118(3) . . . . ?
 Mn1 O1 C1 C2 166.6(5) . . . . ?
 Mn1 O1 C1 C6 -13.9(10) . . . . ?
 Mn1 O2 C7 N1 0.3(8) 3 . . . ?
 Mn1 O2 C7 C6 -178.7(5) 3 . . . ?
 Mn1 O3 N1 Mn1 -173.3(4) 3 . . . ?
 Mn1 O3 N1 C7 -0.8(9) 3 . . . ?
 Mn1 O4 C8 O5 -15.9(9) . . . . ?
 Mn1 O4 C8 C9 164.0(5) . . . . ?
 Mn1 N1 C7 O2 171.5(6) . . . . ?
 Mn1 N1 C7 C6 -9.5(12) . . . . ?
 O1 C1 C2 C3 179.3(9) . . . . ?
 O1 C1 C6 C5 -179.5(7) . . . . ?
 O1 C1 C6 C7 2.8(11) . . . . ?
 O2 Mn1 O1 C1 170.0(6) 4 . . . ?
 O3 Mn1 O1 C1 98.6(9) 4 . . . ?
 O3 N1 C7 O2 0.3(10) . . . . ?
 O3 N1 C7 C6 179.3(6) . . . . ?
 O4 Mn1 O1 C1 -93.5(6) . . . . ?
 O4 C8 C9 C10 169.1(7) . . . . ?
 O4 C8 C9 C11 -71.9(8) . . . . ?
 O4 C8 C9 C12 46.3(10) . . . . ?
 O5 C8 C9 C10 -11.0(10) . . . . ?
 O5 C8 C9 C11 108.0(7) . . . . ?
 O5 C8 C9 C12 -133.9(8) . . . . ?
 N1 Mn1 O1 C1 10.6(6) . . . . ?
 C1 C2 C3 C4 0.3(18) . . . . ?
 C1 C6 C7 O2 -172.5(6) . . . . ?
 C1 C6 C7 N1 8.6(11) . . . . ?
 C2 C1 C6 C5 0.0(11) . . . . ?
 C2 C1 C6 C7 -177.7(7) . . . . ?
 C2 C3 C4 C5 -0.3(19) . . . . ?
 C3 C4 C5 C6 0.1(17) . . . . ?
 C4 C5 C6 C1 0.0(13) . . . . ?
 C4 C5 C6 C7 177.8(9) . . . . ?
 C5 C6 C7 O2 9.8(10) . . . . ?
 C5 C6 C7 N1 -169.2(8) . . . . ?
 C6 C1 C2 C3 -0.2(13) . . . . ?
 Mn1B O1B C1B C2B -164(2) . . . . ?
 Mn1B O1B C1B C6B 18(4) . . . . ?
 Mn1B O2B C7B N1B 1(4) 4 . . . ?
 Mn1B O2B C7B C6B 178.6(19) 4 . . . ?
 Mn1B O4B C8B O5B 9(3) 4 . . . ?
 Mn1B O4B C8B C9B -166.2(17) 4 . . . ?
 Mn1B N1B C7B O2B -170(3) . . . . ?
 Mn1B N1B C7B C6B 12(6) . . . . ?
 O1B Mn1B O3B Tb1 133(2) . . . . ?
 O1B Mn1B O3B N1B -79(4) . . . 3 ?
 O1B C1B C2B C3B 178(4) . . . . ?
 O1B C1B C6B C5B 178(2) . . . . ?
 O1B C1B C6B C7B -2(5) . . . . ?
 O2B Mn1B O1B C1B -177(2) 3 . . . ?
 O2B Mn1B O3B Tb1 -150.6(10) 3 . . . ?
 O2B Mn1B O3B N1B -2(2) 3 . . 3 ?
 O3B Mn1B O1B C1B -103(3) . . . . ?
 O3B N1B C7B O2B -3(5) 4 . . . ?
 O3B N1B C7B C6B 179(3) 4 . . . ?
 O4B Mn1B O1B C1B 87(2) 3 . . . ?
 O4B Mn1B O3B Tb1 -56.8(9) 3 . . . ?
 O4B Mn1B O3B N1B 91(2) 3 . . 3 ?
 O4B C8B C9B C10B 177(3) . . . . ?
 O4B C8B C9B C11B -60(3) . . . . ?
 O4B C8B C9B C12B 55(3) . . . . ?
 O5B C8B C9B C10B 2(4) . . . . ?
 O5B C8B C9B C11B 124(3) . . . . ?
 O5B C8B C9B C12B -121(3) . . . . ?
 N1B Mn1B O1B C1B -15(3) . . . . ?
 N1B Mn1B O3B Tb1 45.4(16) . . . . ?
 N1B Mn1B O3B N1B -167(4) . . . 3 ?
 C1B C2B C3B C4B 6(7) . . . . ?
 C1B C6B C7B O2B 169(3) . . . . ?
 C1B C6B C7B N1B -13(5) . . . . ?
 C2B C1B C6B C5B -1(5) . . . . ?
 C2B C1B C6B C7B -180(3) . . . . ?
 C2B C3B C4B C5B -4(8) . . . . ?
 C3B C4B C5B C6B 0(7) . . . . ?
 C4B C5B C6B C1B 2(5) . . . . ?
 C4B C5B C6B C7B -179(3) . . . . ?
 C5B C6B C7B O2B -10(4) . . . . ?
 C5B C6B C7B N1B 168(3) . . . . ?
 C6B C1B C2B C3B -3(6) . . . . ?
 N2 C13 C14 C15 174.3(10) . . . . ?
 N2 C13 C14 C15B -170.9(13) . . . . ?
 C13 N2 C13 C14 57.4(11) 8_665 . . . ?
 C13 N2 C13 C14 178.9(11) 2_565 . . . ?
 C13 N2 C13 C14 -59.7(11) 7_565 . . . ?
 C13 C14 C15 C16 -177.7(13) . . . . ?
 C13 C14 C15B C16B -81(2) . . . . ?

_shelx_res_file
;
TITL ata_519c_0m_a.res in P4/n
    ata_519c_0m.res
    created by SHELXL-2016/6 at 14:26:21 on 04-Jun-2018
REM Old TITL ata_519c_0m_b.res in P-4
REM SHELXT solution in P4/n
REM R1 0.173, Rweak 0.016, Alpha 0.047, Orientation as input
REM Formula found by SHELXT: C61 Cl8 Mn4 N12 O24 Tb
CELL 0.71073 18.904 18.904 12.3051 90 90 90
ZERR 2 0.0014 0 0.0009 0 0 0
LATT 1
SYMM 0.5-X,0.5-Y,+Z
SYMM 0.5-Y,+X,+Z
SYMM +Y,0.5-X,+Z
SFAC C H Cl Mn N O Tb
UNIT 138 196 20 8 10 40 2
DFIX 2.9 Cl4 Cl3
DFIX 1.77 0.01 Cl3 C18 Cl4 C18
SADI C13 C14 C14 C15 C15 C16 C14 C15B C15B C16B
SADI C9 C10 C9 C11 C9 C12 C9B C10B C9B C11B C9B C12B
SIMU 0.02 0.04 1.7 C9B C9
SIMU 0.01 0.02 1.7 C6B C6
ISOR 0.01 0.02 C16 C15
ISOR 0.01 0.02 C18
ISOR 0.007 0.01 O2B O1B
ISOR 0.01 0.02 C11B C11 C10B C10 C12B C12 C9B C9
ISOR 0.01 0.02 C6B C6 C1B C5 C2B C4 C3B C3 C4B C2 C5B C1
ISOR 0.01 0.02 C7B O2B O1B
EADP Cl3 Cl4
EADP N1 N1B

L.S. 10
PLAN  20
SIZE 0.1 0.44 0.5
TEMP -100(2)
BOND $H
LIST 6
MORE -1
CONF
fmap 2
acta 52
OMIT -2 52
REM <olex2.extras>
REM <HklSrc "%.\\ATA_519C_0m.hkl">
REM </olex2.extras>

WGHT    0.030700   22.737101
FVAR       0.21968   0.80344
TB1   7    0.250000    0.250000    0.647553    10.25000    0.01621    0.01621 =
         0.02906    0.00000    0.00000    0.00000
PART 1
MN1   4    0.381798    0.363091    0.502105    21.00000    0.01308    0.01328 =
         0.03179    0.00346    0.00144   -0.00045
O1    6    0.412796    0.447924    0.445672    21.00000    0.01824    0.01854 =
         0.04800    0.00641    0.00240   -0.00198
O2    6    0.189567    0.465373    0.459097    21.00000    0.01375    0.01718 =
         0.04076    0.00540   -0.00326   -0.00026
O3    6    0.230517    0.347257    0.522758    21.00000    0.01364    0.01329 =
         0.03124    0.00474   -0.00055   -0.00388
O4    6    0.414073    0.380652    0.661935    21.00000    0.02709    0.03270 =
         0.03002    0.00381   -0.00539   -0.00698
O5    6    0.318619    0.333374    0.737222    21.00000    0.02089    0.02820 =
         0.02970   -0.00433   -0.00321   -0.00245
N1    5    0.283538    0.397009    0.499137    21.00000    0.00652    0.01263 =
         0.02716    0.00385   -0.00017   -0.00380
C1    1    0.377503    0.509127    0.431977    21.00000    0.02130    0.01318 =
         0.02057    0.00050   -0.00073   -0.00123
C2    1    0.419668    0.569266    0.408759    21.00000    0.02104    0.02307 =
         0.02947    0.00401    0.00626   -0.00929
AFIX  43
H2    2    0.469644    0.564758    0.404534    21.00000   -1.20000
AFIX   0
C3    1    0.388348    0.634385    0.392261    21.00000    0.03417    0.01570 =
         0.03980    0.00224    0.00035   -0.00642
AFIX  43
H3    2    0.417100    0.674279    0.376353    21.00000   -1.20000
AFIX   0
C4    1    0.315517    0.642401    0.398577    21.00000    0.03431    0.01796 =
         0.04409    0.00301    0.00090    0.00342
AFIX  43
H4    2    0.294400    0.687427    0.387477    21.00000   -1.20000
AFIX   0
C5    1    0.273850    0.583634    0.421375    21.00000    0.02260    0.02423 =
         0.03466    0.00305   -0.00133    0.00064
AFIX  43
H5    2    0.223953    0.588937    0.425612    21.00000   -1.20000
AFIX   0
C6    1    0.303653    0.517247    0.438113    21.00000    0.01868    0.01487 =
         0.02505   -0.00077    0.00001   -0.00152
C7    1    0.256998    0.458234    0.465582    21.00000    0.02137    0.01881 =
         0.02434   -0.00061    0.00194   -0.00098
C8    1    0.380878    0.356702    0.740707    21.00000    0.02493    0.01738 =
         0.03885   -0.00328   -0.00705   -0.00288
C9    1    0.419771    0.355599    0.851589    21.00000    0.03112    0.03468 =
         0.03555    0.00271   -0.01113   -0.00464
C10   1    0.370266    0.338694    0.945079    21.00000    0.04120    0.05740 =
         0.03525    0.00455   -0.00333   -0.00710
AFIX 137
H10A  2    0.334291    0.375823    0.950971    21.00000   -1.50000
H10B  2    0.397347    0.336247    1.012886    21.00000   -1.50000
H10C  2    0.347180    0.293093    0.931774    21.00000   -1.50000
AFIX   0
C11   1    0.475434    0.297779    0.843220    21.00000    0.03885    0.06854 =
         0.05736    0.02565   -0.00618    0.00324
AFIX 137
H11A  2    0.504512    0.297687    0.909154    21.00000   -1.50000
H11B  2    0.505551    0.306618    0.779835    21.00000   -1.50000
H11C  2    0.452110    0.251771    0.835278    21.00000   -1.50000
AFIX   0
C12   1    0.455935    0.427385    0.869615    21.00000    0.06466    0.06093 =
         0.04147    0.00668   -0.02430   -0.03209
AFIX 137
H12A  2    0.420260    0.464994    0.868833    21.00000   -1.50000
H12B  2    0.490407    0.435752    0.811537    21.00000   -1.50000
H12C  2    0.480219    0.427220    0.939979    21.00000   -1.50000
AFIX   0
PART 0
PART 2
MN1B  4    0.198637    0.415564    0.490701   -21.00000    0.00913    0.00917 =
         0.02617    0.00337   -0.00314   -0.00156
O1B   6    0.216525    0.501477    0.434059   -21.00000    0.01313    0.01978 =
         0.02519    0.00442   -0.00221    0.00953
O2B   6    0.415419    0.401632    0.451835   -21.00000    0.01238    0.01660 =
         0.02612   -0.00458    0.00032    0.00036
O3B   6    0.179369    0.318656    0.509285   -21.00000    0.01550    0.01065 =
         0.03105    0.00080   -0.00254    0.00169
O4B   6    0.446864    0.318094    0.651115   -21.00000    0.02636    0.03913 =
         0.02447    0.00371   -0.00077   -0.01732
O5B   6    0.355565    0.259373    0.726009   -21.00000    0.02912    0.03848 =
         0.02193    0.00285   -0.00481   -0.00929
N1B   5    0.303437    0.393955    0.489871   -21.00000    0.00652    0.01263 =
         0.02716    0.00385   -0.00017   -0.00380
C1B   1    0.280209    0.539818    0.425619   -21.00000    0.01284    0.01062 =
         0.01404    0.00466   -0.00401   -0.00153
C2B   1    0.277512    0.609537    0.404555   -21.00000    0.01863    0.02354 =
         0.02409    0.00327   -0.00083    0.00315
AFIX  43
H2B   2    0.232885    0.631575    0.393881   -21.00000   -1.20000
AFIX   0
C3B   1    0.337822    0.649395    0.398188   -21.00000    0.01909    0.01878 =
         0.02568    0.00215   -0.00223   -0.00108
AFIX  43
H3B   2    0.333871    0.699221    0.390179   -21.00000   -1.20000
AFIX   0
C4B   1    0.402861    0.619803    0.402983   -21.00000    0.01053    0.01780 =
         0.02442    0.00048   -0.00395   -0.00311
AFIX  43
H4B   2    0.444458    0.647318    0.393502   -21.00000   -1.20000
AFIX   0
C5B   1    0.406308    0.547833    0.422257   -21.00000    0.00816    0.00858 =
         0.01741    0.00759    0.00615    0.00192
AFIX  43
H5B   2    0.451141    0.525305    0.426602   -21.00000   -1.20000
AFIX   0
C6B   1    0.342447    0.506226    0.435942   -21.00000    0.01075    0.00846 =
         0.01772    0.00051   -0.00009   -0.00372
C7B   1    0.355710    0.429899    0.458879   -21.00000    0.01926    0.01952 =
         0.01328    0.00066   -0.00174    0.00280
C8B   1    0.411888    0.299874    0.736437   -21.00000    0.01678    0.00821 =
         0.04076    0.00190   -0.00985   -0.00306
C9B   1    0.433674    0.330116    0.842554   -21.00000    0.01318    0.00743 =
         0.01803   -0.00450   -0.00112    0.00273
C10B  1    0.385305    0.306366    0.934710   -21.00000    0.04898    0.06205 =
         0.04121   -0.00846   -0.00598   -0.00303
AFIX 137
H10D  2    0.342693    0.335885    0.935566   -21.00000   -1.50000
H10E  2    0.410223    0.311135    1.004163   -21.00000   -1.50000
H10F  2    0.371902    0.256808    0.923649   -21.00000   -1.50000
AFIX   0
C11B  1    0.509750    0.306768    0.861877   -21.00000    0.03537    0.04764 =
         0.05464    0.00167   -0.01384    0.00396
AFIX 137
H11D  2    0.514515    0.256453    0.844151   -21.00000   -1.50000
H11E  2    0.522144    0.314334    0.938330   -21.00000   -1.50000
H11F  2    0.541541    0.334494    0.815583   -21.00000   -1.50000
AFIX   0
C12B  1    0.435107    0.410302    0.837563   -21.00000    0.05645    0.04643 =
         0.04435    0.00278   -0.01011    0.00436
AFIX 137
H12D  2    0.466543    0.425485    0.778686   -21.00000   -1.50000
H12E  2    0.452478    0.429115    0.906812   -21.00000   -1.50000
H12F  2    0.387227    0.428097    0.823969   -21.00000   -1.50000
AFIX   0

PART 0
CL1   3    0.096507    0.653452    0.288100    11.00000    0.10573    0.05619 =
         0.06050    0.00996    0.00371    0.00874
CL2   3    0.111292    0.515669    0.189337    11.00000    0.10376    0.09077 =
         0.07384   -0.02532   -0.00129    0.03383
C17   1    0.083369    0.561673    0.303195    11.00000    0.04760    0.05523 =
         0.04771   -0.00314   -0.00991    0.00553
AFIX  23
H17A  2    0.109848    0.544759    0.367561    11.00000   -1.20000
H17B  2    0.032505    0.552215    0.315683    11.00000   -1.20000
AFIX   0

N2    5    0.250000    0.750000    0.000000    10.25000    0.07812    0.07812 =
         0.04431    0.00000    0.00000    0.00000
C13   1    0.192910    0.722473   -0.075259    11.00000    0.09004    0.09392 =
         0.05189   -0.01319   -0.00816    0.02183
AFIX  23
H13A  2    0.176952    0.762155   -0.121687    11.00000   -1.20000
H13B  2    0.214474    0.686632   -0.123670    11.00000   -1.20000
AFIX   0
C14   1    0.128967    0.690126   -0.023315    11.00000    0.07148    0.11508 =
         0.09176   -0.04240   -0.00042    0.01114
PART 1
AFIX  23
H14A  2    0.106074    0.723094    0.028366    10.60000   -1.20000
H14B  2    0.140605    0.645381    0.014474    10.60000   -1.20000
AFIX  23
PART 0
PART 2
H14C  2    0.104953    0.728902    0.016224    10.40000   -1.20000
H14D  2    0.146941    0.657147    0.032752    10.40000   -1.20000
AFIX   0
PART 0
PART 1
C15   1    0.082689    0.677208   -0.124254    10.60000    0.07592    0.06204 =
         0.06175   -0.00323    0.00379   -0.00257
AFIX  23
H15A  2    0.074553    0.722216   -0.163443    10.60000   -1.20000
H15B  2    0.106437    0.643742   -0.174240    10.60000   -1.20000
AFIX   0
C16   1    0.013677    0.646945   -0.086104    10.60000    0.07264    0.07935 =
         0.09509   -0.03492    0.01412    0.00058
AFIX 137
H16A  2   -0.019725    0.645305   -0.146959    10.60000   -1.50000
H16B  2   -0.005697    0.676771   -0.028160    10.60000   -1.50000
H16C  2    0.021361    0.598986   -0.058265    10.60000   -1.50000
AFIX   0

PART 0
PART -1
CL3   3    0.342647    0.294537    0.250986    10.25000    0.12706    0.44731 =
         0.07960    0.09742    0.00373    0.05086
CL4   3    0.191695    0.329766    0.241111    10.25000    0.12706    0.44731 =
         0.07960    0.09742    0.00373    0.05086
C18   1    0.255057    0.261681    0.258161    10.25000    0.16255    0.16300 =
         0.16249   -0.00266   -0.00110   -0.00027
AFIX  23
H18A  2    0.248191    0.225470    0.201003    10.25000   -1.20000
H18B  2    0.247705    0.238656    0.329534    10.25000   -1.20000
AFIX   0

PART 0
PART 2
C16B  1    0.021078    0.702773   -0.132720    10.40000    0.10572    0.07423 =
         0.05810   -0.01227   -0.00372   -0.00760
AFIX 137
H16D  2   -0.015009    0.677706   -0.174986    10.40000   -1.50000
H16E  2    0.047186    0.735028   -0.180455    10.40000   -1.50000
H16F  2   -0.001769    0.729910   -0.074644    10.40000   -1.50000
AFIX   0
C15B  1    0.071175    0.650386   -0.083995    10.40000    0.08729    0.05926 =
         0.08277   -0.00212    0.02547   -0.01221
AFIX  23
H15C  2    0.092401    0.620919   -0.141964    10.40000   -1.20000
H15D  2    0.045476    0.618864   -0.033311    10.40000   -1.20000
AFIX   0
HKLF 4


REM  ata_519c_0m_a.res in P4/n
REM R1 =  0.0473 for    3891 Fo > 4sig(Fo)  and  0.0546 for all    4332 data
REM    453 parameters refined using    196 restraints

END

WGHT      0.0299     22.8059

REM Highest difference peak  0.702,  deepest hole -1.294,  1-sigma level  0.118
Q1    1   0.2500  0.2500  0.2879  10.25000  0.05    0.70
Q2    1   0.2500  0.2500  0.9569  10.25000  0.05    0.69
Q3    1   0.1033  0.6198  0.2480  11.00000  0.05    0.59
Q4    1   0.1548  0.5079  0.1831  11.00000  0.05    0.58
Q5    1   0.2500  0.2500  0.1916  10.25000  0.05    0.56
Q6    1   0.0943  0.4791  0.2001  11.00000  0.05    0.52
Q7    1   0.3779  0.3596  0.4299  11.00000  0.05    0.50
Q8    1   0.0950  0.5392  0.1388  11.00000  0.05    0.45
Q9    1   0.3664  0.4682  0.6536  11.00000  0.05    0.44
Q10   1   0.0551  0.6633  0.2749  11.00000  0.05    0.43
Q11   1   0.1158  0.7008  0.0409  11.00000  0.05    0.42
Q12   1   0.2867  0.1861  0.3541  11.00000  0.05    0.42
Q13   1   0.4951  0.2300  0.9449  11.00000  0.05    0.42
Q14   1   0.1407  0.6672  0.2384  11.00000  0.05    0.42
Q15   1   0.3607  0.2322  0.2422  11.00000  0.05    0.41
Q16   1   0.2500  0.2500  0.5574  10.25000  0.05    0.40
Q17   1   0.1448  0.3398  0.2307  11.00000  0.05    0.38
Q18   1   0.1107  0.5436  0.2377  11.00000  0.05    0.38
Q19   1   0.4892  0.2314  0.6525  11.00000  0.05    0.37
Q20   1   0.1016  0.6493  0.3155  11.00000  0.05    0.37
;
_shelx_res_checksum                70943
_shelx_hkl_file
;
   0  -1   0   -1.35    0.13
   0  -1   0   -1.09    0.15
   0  -1   0   -1.14    0.20
   0   1   0   -1.00    0.25
   0   1   0   -1.44    0.08
   0   1   0   -1.25    0.18
   1   0   0   -1.37    0.12
   1   0   0   -1.20    0.17
   1   0   0   -1.32    0.13
  -1   0   0   -1.52    0.18
  -1   0   0   -1.25    0.16
  -1   0   0   -1.41    0.16
  -1   1   0 1763.73   73.05
   1  -1   0 2088.99   73.11
  -2  -1   0   -1.41    1.77
  -1   2   0    0.63    1.53
   1  -2   0   -4.28    1.22
   1  -2   0   -3.06    1.27
   2   1   0   -3.46    1.58
  -2  -1   0   -3.69    1.28
  -1   2   0   -1.39    1.39
  -2  -1   0   -0.79    1.43
  -2   0   0  890.36   34.81
  -2   0   0  923.48   35.10
  -2   0   0  861.03   35.06
   0   2   0  953.98   34.97
   0  -2   0  905.45   35.08
   2   0   0  878.47   35.09
   0   2   0  931.28   35.12
   0  -2   0  914.89   35.11
  -2   1   0    2.44    1.08
  -1  -2   0    2.07    1.08
   2  -1   0    2.68    1.19
  -2   1   0    4.45    1.14
   2  -1   0    5.16    0.80
   1   2   0    5.74    1.08
  -2   1   0    4.50    0.74
   1   2   0    3.51    0.99
   2  -2   0  353.78   13.61
  -2   2   0  344.14   14.25
  -2  -2   0  341.13   14.19
  -2   2   0  341.96   14.13
   2  -2   0  328.87   14.10
   2   2   0  328.05   13.80
   2  -3   0    9.33    2.10
  -2   3   0    8.44    2.64
  -3  -2   0    4.03    2.30
  -2   3   0    8.77    2.40
   2  -3   0   10.02    2.38
  -3  -2   0    7.75    2.05
  -3  -1   0  640.40   26.44
  -3  -1   0  682.38   26.62
   1  -3   0  700.59   26.55
  -1   3   0  661.39   26.69
   1  -3   0  666.88   26.60
  -3  -1   0  650.97   27.01
   3   1   0  695.47   26.87
  -1   3   0  702.38   26.62
   3   1   0  666.16   27.08
  -3   0   0   26.69    3.17
  -3   0   0   22.81    2.65
   3   0   0   28.25    2.84
   0  -3   0   23.98    2.87
   0   3   0   25.86    2.50
  -3   0   0   28.02    2.83
   0   3   0   25.07    2.30
   0  -3   0   35.22    2.91
  -3   0   0   24.18    2.14
  -3   1   0   22.71    2.74
  -3   1   0   20.22    2.61
   1   3   0   20.08    2.41
  -1  -3   0   19.99    2.80
   1   3   0   25.83    2.49
  -3   2   0   47.33    4.55
  -3   2   0   58.96    4.78
   3  -2   0   60.74    3.34
   3  -2   0   49.62    4.56
   2   3   0   63.43    4.09
  -2  -3   0   54.56    4.56
   3  -3   0  326.01   12.82
  -3   3   0  324.03   13.68
  -3   3   0  309.49   13.93
  -3  -3   0  318.16   13.74
   3  -3   0  306.61   13.61
   3   3   0  289.42   13.11
  -3   4   0   64.05    5.24
  -4  -3   0   62.06    4.90
   4   3   0   70.76    4.58
   3  -4   0   65.07    4.24
  -3   4   0   58.51    4.79
  -4  -2   0 9673.32  368.45
  -2   4   0 9739.84  368.52
  -2   4   0 9424.16  368.61
   2  -4   0 9999.00  368.20
  -4  -2   0 9883.14  368.55
  -4  -1   0   57.24    4.30
  -1   4   0   60.78    4.28
  -1   4   0   63.92    4.90
  -4  -1   0   79.62    6.00
   1  -4   0   60.54    4.36
   0   4   0 2879.94  123.02
  -4   0   0 3283.88  123.12
  -4   0   0 3315.25  122.57
  -4   0   0 3187.92  123.46
   0   4   0 3199.66  122.80
   4   0   0 3330.44  123.88
   0  -4   0 3419.88  123.23
  -4   0   0 3197.83  123.10
   1   4   0    1.34    2.10
   1   4   0   -0.08    2.24
   4  -1   0    4.91    2.68
  -1  -4   0   -0.96    2.71
  -4   1   0    0.18    2.64
  -4   1   0    0.28    1.57
   2   4   0  621.89   25.99
   4  -2   0  648.69   25.14
   2   4   0  619.53   25.56
  -2  -4   0  649.70   26.20
  -4   2   0  658.29   26.11
  -4   2   0  646.08   26.04
   4  -2   0  642.34   26.14
   4  -3   0   33.31    2.62
  -3  -4   0   30.98    3.72
  -4   3   0   23.02    3.52
  -4   3   0   23.39    3.29
   3   4   0   25.45    2.91
   4  -4   0 2959.24  110.12
  -4   4   0 2898.43  111.19
  -4   4   0 2868.00  111.29
  -4  -4   0 2938.61  111.36
   4   4   0 2791.13  110.65
  -5  -4   0   66.67    5.41
   4  -5   0   72.07    4.70
   5   4   0   68.81    4.71
  -4   5   0   70.16    6.08
  -4   5   0   59.88    5.60
   3  -5   0  706.70   27.90
  -3   5   0  692.71   28.52
  -5  -3   0  696.41   28.42
  -3   5   0  695.63   28.69
  -5  -3   0  697.99   28.54
  -5  -2   0   26.36    3.89
  -5  -2   0   33.35    3.46
  -2   5   0   29.40    3.33
  -5  -2   0   34.90    3.45
  -2   5   0   27.77    3.39
   2  -5   0   38.69    3.45
  -5  -1   0  117.18    6.75
   1  -5   0  101.38    6.06
  -5  -1   0  102.47    5.87
  -1   5   0   86.70    5.51
  -5  -1   0  105.33    5.48
  -1   5   0   83.04    6.02
  -5  -1   0   98.50    6.71
  -5   0   0   20.80    3.50
   0   5   0   24.12    2.88
  -5   0   0   17.05    2.31
  -5   0   0   19.69    2.88
   0   5   0   17.22    2.79
  -5   0   0   22.75    3.07
   0  -5   0   19.65    3.37
   1   5   0  325.61   14.21
  -5   1   0  303.02   14.02
  -5   1   0  302.53   13.00
   1   5   0  334.48   13.71
  -5   1   0  318.27   14.11
  -1  -5   0  325.25   14.29
  -5   2   0    0.82    2.17
   2   5   0    0.91    1.95
   2   5   0    3.72    2.05
  -2  -5   0    3.13    2.45
  -5   2   0    1.40    2.31
   5  -2   0   -0.54    1.20
   3   5   0  822.36   31.71
  -3  -5   0  781.25   32.27
   5  -3   0  812.66   30.88
  -5   3   0  776.40   32.05
   3   5   0  758.71   32.02
  -5   3   0  763.72   32.04
  -4  -5   0   38.71    4.40
   5  -4   0   43.98    3.28
  -5   4   0   42.91    4.55
  -5   4   0   41.74    4.68
   4   5   0   47.05    4.12
   5   5   0 1563.79   61.01
   5  -5   0 1604.42   60.23
  -5   5   0 1534.42   61.56
  -5   5   0 1505.58   61.72
  -5  -5   0 1594.23   61.80
   5  -6   0   53.85    4.94
  -5   6   0   56.05    6.34
   6   5   0   58.79    5.17
  -5   6   0   46.42    6.09
  -6  -5   0   50.68    5.81
  -6  -4   0 1508.41   61.10
  -4   6   0 1579.69   61.18
   4  -6   0 1591.28   60.20
   6   4   0 1524.07   60.52
  -4   6   0 1545.03   61.39
  -6  -3   0   13.01    3.01
  -6  -3   0    3.72    2.44
  -3   6   0    8.84    2.95
   3  -6   0   10.07    2.63
  -3   6   0    3.70    2.96
   2  -6   0  830.84   33.06
  -2   6   0  848.32   33.57
  -6  -2   0  791.90   33.21
  -6  -2   0  807.27   33.06
  -2   6   0  828.26   33.24
  -6  -2   0  821.84   34.29
   1  -6   0   69.47    5.54
  -6  -1   0   61.98    4.71
  -1   6   0   84.86    5.92
  -6  -1   0   67.68    5.88
  -6  -1   0   80.65    6.37
  -1   6   0   75.58    5.08
  -6  -1   0   76.91    5.54
  -6   0   0  329.11   14.94
  -6   0   0  323.31   15.48
   0   6   0  342.82   15.07
  -6   0   0  330.09   13.99
   0  -6   0  325.91   14.85
  -6   0   0  332.45   14.82
   0   6   0  334.91   14.46
   1   6   0    9.30    2.69
  -1  -6   0    4.98    2.59
  -6   1   0    2.52    2.35
   1   6   0    1.72    2.10
  -6   1   0    1.18    1.52
  -6   1   0   -0.18    2.25
  -6   2   0   59.10    5.24
   6  -2   0   54.48    3.55
   2   6   0   55.98    5.05
  -6   2   0   45.50    4.53
   2   6   0   54.96    4.46
  -2  -6   0   50.83    4.97
  -6   3   0    2.31    2.75
   3   6   0    0.02    2.44
  -6   3   0    0.37    2.68
   3   6   0    1.51    2.37
  -3  -6   0   -0.42    2.86
   6  -3   0    1.96    1.61
  -4  -6   0  985.19   41.60
   4   6   0 1046.58   41.59
  -6   4   0  972.22   41.39
  -6   4   0  997.65   41.42
   6  -4   0 1076.05   39.92
   4   6   0 1054.12   41.02
  -6   5   0    3.67    4.16
   5   6   0    1.13    3.10
  -6   5   0   -3.09    3.59
  -5  -6   0   -6.93    3.52
   6  -5   0    4.49    2.42
  -6   6   0  364.61   18.06
   6  -6   0  377.09   16.01
  -6  -6   0  385.91   18.09
  -6   6   0  361.74   18.19
   6   6   0  353.80   16.91
  -7  -6   0    9.41    5.51
  -6   7   0   13.06    5.03
   7   6   0   21.61    4.63
   6  -7   0   16.13    3.74
  -6   7   0   19.71    5.64
   7   5   0  259.59   13.17
  -5   7   0  270.96   14.90
  -7  -5   0  273.97   14.08
   5  -7   0  255.60   12.57
  -5   7   0  267.47   13.95
  -4   7   0    0.20    3.76
   4  -7   0    3.67    3.27
  -7  -4   0   -0.50    3.55
  -4   7   0    3.44    3.73
   3  -7   0   53.73    5.21
  -3   7   0   56.91    5.88
  -3   7   0   52.27    5.47
  -7  -3   0   63.49    5.97
  -7  -3   0   51.37    5.33
   2  -7   0   41.66    4.55
  -2   7   0   41.39    4.96
  -7  -2   0   37.94    4.15
  -2   7   0   38.93    4.50
  -7  -2   0   35.93    4.47
  -7  -2   0   40.74    5.76
  -7  -1   0  613.56   25.61
   1  -7   0  580.75   25.49
  -7  -1   0  609.43   26.70
  -1   7   0  617.61   25.87
  -1   7   0  609.62   25.20
  -7  -1   0  569.76   25.70
  -7  -1   0  641.83   25.01
  -7   0   0    3.86    3.10
   0  -7   0    3.51    3.21
  -7   0   0   -0.76    2.96
  -7   0   0    0.48    3.73
  -7   0   0    3.01    2.15
   0   7   0    0.02    2.83
   0   7   0    3.01    2.64
   1   7   0  734.95   29.88
  -7   1   0  738.00   30.55
  -7   1   0  714.14   29.16
  -1  -7   0  724.23   30.64
  -7   1   0  717.88   30.40
   1   7   0  783.76   30.80
   7  -2   0   -0.03    1.60
   2   7   0    4.17    2.89
  -7   2   0    3.75    3.36
  -7   2   0   -2.27    2.99
   2   7   0   -1.79    2.71
  -2  -7   0   -9.15    3.35
  -7   3   0  199.89   11.53
   3   7   0  231.00   12.05
   7  -3   0  229.84   10.18
  -3  -7   0  209.10   11.95
   3   7   0  238.67   11.25
  -7   3   0  199.55   11.67
   7  -4   0  179.12    8.23
  -7   4   0  152.91   10.52
  -7   4   0  151.08   10.19
   4   7   0  152.29   10.29
  -4  -7   0  156.89   11.09
   4   7   0  167.74    9.51
  -5  -7   0   39.19    6.34
  -7   5   0   47.44    6.40
  -7   5   0   55.11    6.63
   5   7   0   34.06    5.28
   7  -5   0   50.20    4.50
   5   7   0   38.48    5.91
  -7   6   0   16.72    5.15
  -6  -7   0    2.18    4.94
   6   7   0   17.81    4.54
  -7   6   0    8.04    5.01
   7  -6   0   20.23    3.45
   7   7   0 1644.52   64.86
  -7   7   0 1680.26   65.88
  -7   7   0 1539.14   65.69
   7  -7   0 1652.52   63.54
  -7  -7   0 1659.35   65.92
  -7   8   0   34.45    6.35
  -8  -7   0   29.13    6.04
  -7   8   0   32.53    5.94
   7  -8   0   40.98    4.52
   8   7   0   42.92    5.34
   6  -8   0 1634.75   63.50
  -8  -6   0 1678.45   65.43
  -6   8   0 1594.85   65.10
   8   6   0 1604.81   64.37
  -6   8   0 1606.66   65.62
   8   5   0   25.21    4.91
   5  -8   0   19.24    4.34
  -8  -5   0   16.48    4.99
  -5   8   0   15.19    5.19
  -5   8   0    6.04    5.03
  -4   8   0  180.40   11.54
   4  -8   0  179.80    9.97
  -4   8   0  172.19   10.62
  -8  -4   0  158.55   10.69
  -8  -4   0  157.51   10.16
  -8  -3   0   46.62    6.17
   3  -8   0   42.45    5.58
  -3   8   0   37.99    5.48
  -3   8   0   41.17    5.88
  -8  -3   0   45.26    5.61
  -8  -2   0    6.54    3.61
  -2   8   0   10.24    4.30
  -2   8   0    2.76    4.12
   2  -8   0    5.58    3.88
  -8  -2   0   10.88    4.10
  -8  -2   0    3.91    5.80
   1  -8   0    1.76    3.71
  -8  -1   0   -7.20    4.03
  -8  -1   0    6.51    4.99
  -1   8   0    0.44    3.78
  -8  -1   0    1.03    2.90
  -8  -1   0    0.71    3.57
  -1   8   0   -3.19    3.57
  -8   0   0 1680.62   65.94
  -8   0   0 1678.80   65.83
  -8   0   0 1615.07   64.72
  -8   0   0 1681.89   66.79
   0  -8   0 1709.42   66.03
   0   8   0 1616.37   66.02
   0   8   0 1678.28   65.34
   1   8   0  140.12    9.17
  -8   1   0  114.74    9.04
  -8   1   0  120.17    8.82
   1   8   0  118.95    8.04
  -8   1   0  118.56    7.04
  -1  -8   0  124.06    9.68
  -8   2   0 3456.47  133.96
   2   8   0 3587.59  133.18
   2   8   0 3333.81  133.90
  -2  -8   0 3483.18  134.19
   8  -2   0 3435.76  132.34
  -8   2   0 3511.87  133.73
  -8   3   0   74.41    7.54
   8  -3   0   84.55    5.62
  -3  -8   0   71.14    7.72
  -8   3   0   70.95    7.73
   3   8   0   68.81    7.11
   3   8   0   84.64    6.91
  -8   4   0  359.97   17.05
  -4  -8   0  383.30   17.63
   4   8   0  280.33   16.61
   8  -4   0  325.18   14.51
  -8   4   0  362.38   17.03
   4   8   0  288.22   15.66
   8  -5   0  129.69    7.28
   5   8   0  129.59   10.20
   5   8   0  139.62    9.13
  -8   5   0  127.84   10.37
  -5  -8   0  119.01   10.11
  -8   5   0  117.09   10.45
  -8   6   0  237.17   13.64
   6   8   0  219.62   12.78
   8  -6   0  243.62   11.07
  -6  -8   0  237.13   14.01
  -8   6   0  257.91   14.14
   6   8   0  223.14   14.17
   7   8   0    3.54    4.00
  -8   7   0    0.72    4.77
   7   8   0    3.36    4.04
   8  -7   0    1.24    2.59
  -7  -8   0    3.27    4.50
  -8   7   0    7.37    4.89
  -8   8   0 2120.32   86.21
  -8  -8   0 2171.05   86.57
  -8   8   0 2146.45   86.53
   8   8   0 2164.89   85.34
   8  -8   0 2229.53   83.82
   9   8   0    5.80    3.90
  -9  -8   0   -1.07    4.36
  -8   9   0   -1.63    4.20
  -8   9   0    6.49    4.45
   8  -9   0    8.41    3.10
  -7   9   0 1050.90   44.76
   9   7   0 1056.31   43.96
  -7   9   0 1058.57   45.40
  -9  -7   0 1077.33   45.00
   7  -9   0 1088.50   42.86
   9   6   0   61.54    6.26
   6  -9   0   46.72    5.25
  -6   9   0   37.10    6.48
  -6   9   0   34.41    6.46
  -9  -6   0   46.28    6.36
   9   5   0  535.81   23.56
   5  -9   0  530.63   23.09
  -5   9   0  528.66   24.79
  -9  -5   0  513.25   24.14
  -5   9   0  547.32   24.27
  -9  -4   0   14.47    4.48
   4  -9   0   14.86    4.53
  -4   9   0   16.39    4.86
  -4   9   0   18.57    5.27
  -9  -4   0   17.65    4.92
  -9  -3   0  391.92   21.21
  -3   9   0  414.85   19.78
  -9  -3   0  401.44   18.69
   3  -9   0  389.77   18.63
  -9  -3   0  390.22   19.14
  -3   9   0  401.70   19.04
  -9  -2   0   -1.78    4.65
  -9  -2   0    1.92    6.30
  -2   9   0    1.62    4.41
  -9  -2   0    2.68    3.86
  -2   9   0    7.63    4.60
   2  -9   0    3.11    4.58
   1  -9   0  858.43   35.49
  -9  -1   0  826.15   36.96
  -9  -1   0  852.87   35.36
  -1   9   0  798.66   35.68
  -9  -1   0  861.91   34.40
  -1   9   0  834.86   34.89
  -9  -1   0  848.97   35.87
   0   9   0  198.39   12.25
   0   9   0  161.27   10.28
  -9   0   0  161.68   10.87
   0  -9   0  158.63   11.58
  -9   0   0  164.11   13.45
  -9   0   0  157.85   11.48
  -9   0   0  182.72    9.42
  -9   1   0  854.44   38.17
  -9   1   0  876.87   35.42
  -9   1   0  903.95   37.13
   1   9   0  856.89   37.48
   1   9   0  878.91   36.26
  -1  -9   0  917.23   37.67
  -9   1   0  898.32   37.24
   9  -2   0   74.16    5.20
  -2  -9   0   69.25    7.71
   2   9   0   66.39    6.57
   2   9   0   69.62    7.35
  -9   2   0   53.52    7.46
  -9   2   0   58.02    6.72
  -9   3   0  721.98   31.70
   3   9   0  700.23   31.86
   9  -3   0  762.40   29.96
  -3  -9   0  734.12   32.22
  -9   3   0  706.75   31.99
   3   9   0  777.28   30.93
  -4  -9   0   60.23    7.75
   4   9   0   70.55    6.75
   9  -4   0   75.79    5.53
  -9   4   0   66.50    7.72
   4   9   0   68.57    7.98
  -9   4   0   64.22    7.34
  -9   5   0    5.05    5.15
   9  -5   0   12.62    2.81
   5   9   0    5.68    4.44
  -9   5   0    9.85    4.90
   5   9   0    1.84    4.16
  -5  -9   0   -5.38    4.56
  -9   6   0    4.97    4.52
   6   9   0    4.73    4.12
   6   9   0   -5.56    3.24
   9  -6   0   -2.98    2.24
  -6  -9   0   -2.46    4.45
  -9   6   0    2.51    4.78
  -9   7   0  602.70   27.31
   9  -7   0  604.91   24.36
   7   9   0  596.40   27.47
  -7  -9   0  588.92   27.49
  -9   7   0  567.69   27.30
   7   9   0  593.09   26.51
  -8  -9   0    6.37    4.86
  -9   8   0    7.63    4.72
   9  -8   0   10.52    2.98
   8   9   0   12.22    5.09
  -9   8   0    9.23    4.79
   8   9   0   10.50    4.29
  -9   9   0  859.38   37.93
  -9   9   0  849.33   38.17
  -9  -9   0  884.87   38.50
   9  -9   0  874.06   35.06
   9   9   0  849.46   38.27
   9   9   0  890.03   37.10
   9 -10   0   33.88    4.52
  10   9   0   37.77    5.93
  -9  10   0   40.15    7.05
  -9  10   0   23.47    6.46
 -10  -9   0   23.36    6.28
  10   8   0  639.19   28.01
  -8  10   0  622.84   29.03
  -8  10   0  592.96   29.31
 -10  -8   0  640.85   29.05
   8 -10   0  633.53   26.50
  10   7   0   24.07    4.94
  -7  10   0   18.62    5.30
   7 -10   0   28.77    4.30
 -10  -7   0   21.98    5.24
  -7  10   0   13.82    5.38
  10   6   0  917.23   37.90
  -6  10   0  905.84   39.39
 -10  -6   0  893.95   38.72
   6 -10   0  914.23   37.26
  -6  10   0  896.24   38.78
 -10  -5   0   18.48    4.88
   5 -10   0   24.13    4.51
  -5  10   0   18.90    5.47
  -5  10   0   24.70    5.52
 -10  -4   0  148.19    9.83
 -10  -4   0  162.58   10.24
  -4  10   0  145.65   10.18
  -4  10   0  163.65   10.84
   4 -10   0  152.38    9.77
 -10  -3   0   30.59    5.87
   3 -10   0   31.63    5.35
  -3  10   0   20.77    5.24
 -10  -3   0   29.27    4.90
 -10  -3   0   34.04    6.92
  -3  10   0   27.95    5.07
  -2  10   0  573.36   26.33
   2 -10   0  610.83   25.72
 -10  -2   0  534.74   24.85
 -10  -2   0  548.84   27.21
 -10  -2   0  616.48   26.26
  -2  10   0  580.58   25.57
   1 -10   0   38.85    6.34
  -1  10   0   24.50    5.19
 -10  -1   0   31.81    4.73
 -10  -1   0   32.03    7.42
 -10  -1   0   30.46    5.55
  -1  10   0   34.30    5.42
   0  10   0   57.80    5.97
   0 -10   0   55.09    6.87
 -10   0   0   69.09    7.67
 -10   0   0   62.96    5.63
   0  10   0   47.71    6.42
 -10   0   0   60.14    8.12
 -10   0   0   62.01    7.28
 -10   1   0   39.71    4.48
 -10   1   0   44.27    6.71
 -10   1   0   27.13    5.54
 -10   1   0   46.07    7.84
   1  10   0   29.10    5.60
   1  10   0   36.61    5.11
  -1 -10   0   34.32    6.12
   2  10   0  592.11   26.39
 -10   2   0  554.91   25.87
   2  10   0  606.92   25.20
 -10   2   0  559.19   26.34
  10  -2   0  570.12   24.06
  -2 -10   0  578.86   26.47
  10  -3   0    1.50    2.36
   3  10   0   -3.34    3.62
   3  10   0    1.09    4.22
 -10   3   0   -2.27    4.23
 -10   3   0   -0.52    4.17
  -3 -10   0    0.61    4.82
   4  10   0  306.20   16.83
 -10   4   0  312.47   16.82
   4  10   0  326.32   15.65
 -10   4   0  326.43   17.29
  10  -4   0  318.03   14.32
  -4 -10   0  314.82   17.10
   5  10   0   33.64    5.45
   5  10   0   38.76    6.17
  -5 -10   0   35.75    6.51
 -10   5   0   30.96    5.76
 -10   5   0   44.05    6.50
  10  -5   0   45.47    4.30
  10  -6   0 1752.77   65.99
   6  10   0 1614.86   69.13
 -10   6   0 1726.96   69.08
   6  10   0 1573.48   67.68
 -10   6   0 1756.40   68.71
  -6 -10   0 1785.46   69.82
 -10   7   0    3.66    5.06
 -10   7   0   -6.32    4.17
   7  10   0    2.93    4.37
  -7 -10   0   -3.42    4.36
   7  10   0    3.20    3.73
  10  -7   0   -3.66    2.38
  -8 -10   0   22.10    5.97
   8  10   0   35.49    6.25
 -10   8   0    8.62    5.07
   8  10   0   19.99    5.07
 -10   8   0   30.24    6.18
  10  -8   0   22.06    3.56
 -10   9   0    5.34    5.05
  10  -9   0    7.98    2.99
   9  10   0    9.89    5.14
 -10   9   0    7.55    5.36
   9  10   0   13.71    5.06
  -9 -10   0    8.52    6.06
 -10 -10   0  143.97   11.98
  10  10   0  167.11   11.35
 -10  10   0  148.81   11.89
  10  10   0  151.98   12.95
  10 -10   0  146.70    8.74
 -10  10   0  159.41   12.62
  10 -11   0   11.70    3.77
  11  10   0    5.87    6.00
  11  10   0    6.14    4.93
 -10  11   0    8.67    5.81
 -11 -10   0   15.88    6.22
 -10  11   0   -5.72    5.20
  -9  11   0  881.28   40.71
  11   9   0  911.38   39.15
  -9  11   0  941.85   40.60
   9 -11   0  918.05   37.28
 -11  -9   0  892.94   40.35
 -11  -8   0    6.34    5.42
  -8  11   0    6.39    5.49
  11   8   0    2.31    4.31
  -8  11   0    9.29    5.76
   8 -11   0    5.84    3.65
   7 -11   0    9.75    3.76
  11   7   0    8.90    4.34
  -7  11   0    8.88    4.91
  -7  11   0    7.05    4.87
 -11  -7   0   18.61    5.22
  -6  11   0   -3.31    4.12
 -11  -6   0   -1.24    4.05
   6 -11   0    5.46    3.69
  -6  11   0   -5.90    3.62
  11   6   0   -1.15    3.27
  -5  11   0   22.37    5.53
 -11  -5   0   18.30    4.66
  -5  11   0   20.58    5.57
   5 -11   0   27.64    4.73
 -11  -4   0   16.32    4.52
  -4  11   0   21.62    5.10
 -11  -4   0   17.09    5.13
   4 -11   0   19.01    4.64
  -4  11   0   13.14    4.95
 -11  -3   0 1360.48   59.11
   3 -11   0 1433.88   57.14
  -3  11   0 1386.56   57.08
 -11  -3   0 1362.30   57.42
 -11  -3   0 1540.87   57.14
  -3  11   0 1381.14   58.03
 -11  -2   0   11.27    4.20
  -2  11   0   -3.50    3.90
   2 -11   0   11.81    4.73
 -11  -2   0   11.07    6.13
 -11  -2   0   -0.98    3.39
  -2  11   0    1.47    4.10
 -11  -1   0  449.13   20.42
  -1  11   0  489.10   22.56
   1 -11   0  458.12   21.89
  -1  11   0  464.53   21.00
 -11  -1   0  427.33   22.97
 -11  -1   0  458.83   21.77
   0  11   0    6.89    4.58
   0  11   0   10.92    4.12
   0 -11   0   10.69    5.10
 -11   0   0    2.17    4.00
 -11   0   0   -0.33    4.32
 -11   0   0    4.88    6.08
 -11   0   0    9.49    3.39
 -11   1   0  159.62   11.27
 -11   1   0  169.81   12.63
 -11   1   0  169.31   11.27
 -11   1   0  176.15    9.50
   1  11   0  192.06   11.86
   1  11   0  178.24   10.57
  -1 -11   0  155.12   11.77
   2  11   0   23.10    4.84
 -11   2   0   33.54    5.75
  11  -2   0   45.04    4.46
   2  11   0   36.34    6.00
 -11   2   0   34.70    5.97
  -2 -11   0   33.67    6.33
 -11   3   0  328.68   17.36
 -11   3   0  331.30   17.29
   3  11   0  358.41   18.20
  -3 -11   0  310.30   17.45
   3  11   0  310.57   16.04
  11  -3   0  339.42   15.16
   4  11   0   49.76    6.87
 -11   4   0   37.89    6.39
  -4 -11   0   50.95    7.26
 -11   4   0   46.80    6.73
   4  11   0   38.23    5.56
  11  -4   0   55.05    4.86
 -11   5   0 1157.55   48.96
   5  11   0 1104.07   49.45
  11  -5   0 1233.76   46.64
 -11   5   0 1157.60   49.51
   5  11   0 1233.21   48.27
  -5 -11   0 1159.66   49.93
 -11   6   0   61.32    7.97
 -11   6   0   53.76    7.28
  11  -6   0   69.16    5.32
  -6 -11   0   67.07    8.50
   6  11   0   67.45    8.04
   6  11   0   76.63    7.32
 -11   7   0  168.21   11.59
  -7 -11   0  153.52   11.84
 -11   7   0  163.09   11.53
  11  -7   0  144.28    7.98
   7  11   0  136.78   12.12
   7  11   0  139.28   10.62
 -11   8   0    5.07    5.18
 -11   8   0    1.96    4.76
  11  -8   0    2.34    2.67
  -8 -11   0    7.05    5.43
   8  11   0   11.86    5.65
   8  11   0   14.91    4.77
   9  11   0  191.55   14.17
 -11   9   0  186.62   13.84
  11  -9   0  168.40    9.24
 -11   9   0  164.90   12.75
   9  11   0  171.48   11.96
  -9 -11   0  191.43   13.65
 -10 -11   0    3.96    5.97
  11 -10   0   -1.22    2.88
  10  11   0   -3.99    4.69
 -11  10   0   -6.94    5.14
  10  11   0    8.85    5.57
 -11  10   0    3.92    5.48
  11  11   0   59.23    8.88
 -11 -11   0   52.79    8.57
 -11  11   0   53.38    8.83
  11 -11   0   58.21    5.60
 -11  11   0   57.40    9.26
  11  11   0   49.27    7.81
  12  11   0   -1.11    5.52
 -11  12   0   -3.32    5.79
  11 -12   0   -0.38    3.38
 -11  12   0  -14.46    5.58
 -12 -11   0   -2.36    5.52
  12  11   0   -6.33    5.20
 -10  12   0  440.85   22.92
  10 -12   0  406.03   18.72
 -12 -10   0  406.47   22.66
  12  10   0  363.85   21.84
 -10  12   0  410.95   23.22
  12  10   0  425.36   21.32
  -9  12   0    4.77    5.67
   9 -12   0   -5.63    3.46
 -12  -9   0    4.28    5.25
  -9  12   0   -3.22    5.62
  12   9   0   -8.33    4.28
   8 -12   0    8.13    4.11
  12   8   0    0.86    4.50
 -12  -8   0   17.78    5.53
  -8  12   0   14.60    5.86
  -8  12   0    3.97    5.71
 -12  -7   0   -8.72    3.70
  12   7   0    3.12    4.27
   7 -12   0    2.98    3.83
  -7  12   0   -6.01    4.67
  -7  12   0   -1.12    4.43
  12   6   0   24.53    5.58
 -12  -6   0   21.83    5.70
  -6  12   0   18.44    6.09
  -6  12   0   22.69    5.51
   6 -12   0   25.31    4.93
   5 -12   0   -1.50    3.55
 -12  -5   0   -6.27    3.15
  -5  12   0   -1.42    4.00
  -5  12   0    4.94    4.90
 -12  -4   0  799.51   35.57
   4 -12   0  853.37   34.98
  -4  12   0  801.79   36.27
  -4  12   0  838.07   35.40
 -12  -4   0  771.29   34.82
  -3  12   0    8.79    4.70
 -12  -3   0    7.46    6.51
 -12  -3   0   17.57    5.43
  -3  12   0    4.89    4.94
 -12  -3   0    8.67    3.69
 -12  -2   0 1665.24   70.13
 -12  -2   0 1763.85   72.00
  -2  12   0 1687.56   70.58
 -12  -2   0 1808.69   69.27
  -2  12   0 1750.30   69.71
   2 -12   0 1756.23   70.07
  -1  12   0   -0.08    3.50
 -12  -1   0    9.87    6.04
  -1  12   0    4.13    3.98
 -12  -1   0    4.19    3.31
   1 -12   0    0.76    4.47
 -12  -1   0    5.41    4.60
   0  12   0  152.11   10.04
   0 -12   0  156.45   10.75
 -12   0   0  144.75    8.89
 -12   0   0  150.94   10.59
   0  12   0  143.96   10.89
 -12   0   0  149.01   10.73
 -12   0   0  159.35   13.05
 -12   1   0   55.41    7.00
   1  12   0   63.75    6.82
 -12   1   0   67.13    5.90
  -1 -12   0   70.28    8.46
 -12   1   0   83.72    9.87
   1  12   0   61.75    8.00
 -12   1   0   69.34    8.08
   2  12   0   51.01    6.19
  -2 -12   0   41.20    7.00
 -12   2   0   39.01    6.22
 -12   2   0   50.40    8.37
  12  -2   0   61.54    5.50
 -12   2   0   35.66    6.33
   2  12   0   65.61    7.86
  12  -3   0    4.30    2.77
   3  12   0   10.94    4.24
 -12   3   0    7.00    4.42
 -12   3   0    3.89    4.67
   3  12   0   13.06    5.56
  -3 -12   0   10.67    5.36
  12  -4   0  503.30   21.62
 -12   4   0  481.78   23.56
  -4 -12   0  525.88   25.13
 -12   4   0  500.38   24.43
   4  12   0  513.16   22.89
   4  12   0  471.13   24.27
  -5 -12   0   21.24    6.24
 -12   5   0   24.65    6.30
   5  12   0   21.15    6.35
 -12   5   0   21.19    5.82
  12  -5   0   28.88    3.92
   5  12   0   36.26    5.62
   6  12   0  998.85   42.14
   6  12   0  959.21   43.87
  -6 -12   0  996.64   44.23
 -12   6   0 1025.21   43.41
 -12   6   0  988.76   43.82
  12  -6   0 1066.66   40.30
 -12   7   0   -4.78    4.45
  12  -7   0   -1.94    2.55
   7  12   0   -4.21    4.05
  -7 -12   0   -0.93    5.29
   7  12   0    0.44    5.53
 -12   7   0   -5.56    4.66
  -8 -12   0    0.15    5.33
 -12   8   0   12.14    5.59
   8  12   0    7.40    5.17
  12  -8   0    1.93    2.79
   8  12   0    2.28    5.22
 -12   8   0    2.42    5.28
  12  -9   0    1.26    2.86
 -12   9   0   -0.24    5.43
   9  12   0   -2.14    5.57
 -12   9   0   -1.74    5.28
  -9 -12   0    1.23    6.01
   9  12   0   -3.41    4.52
 -12  10   0  270.59   17.05
  10  12   0  257.73   15.82
  12 -10   0  276.11   12.46
 -10 -12   0  241.41   17.61
 -12  10   0  241.91   16.55
  10  12   0  239.20   16.85
 -11 -12   0    9.07    7.24
  11  12   0   10.56    6.35
 -12  11   0   13.80    6.81
  11  12   0   17.50    6.32
  12 -11   0    6.28    3.42
 -12  11   0   15.49    7.53
  12  12   0  167.92   14.69
  12 -12   0  169.71    9.87
  12  12   0  175.64   13.41
 -12  12   0  171.01   14.10
 -12 -12   0  210.66   15.80
 -12  12   0  163.65   15.14
 -12  13   0   11.29    6.90
 -13 -12   0    2.76    7.21
  13  12   0   10.54    6.23
  13  12   0    7.62    7.33
 -12  13   0   -8.24    6.56
 -13 -11   0  666.17   33.54
 -11  13   0  718.95   34.24
 -11  13   0  722.60   34.66
  13  11   0  676.69   32.31
  11 -13   0  674.06   29.48
  13  11   0  737.00   34.80
  10 -13   0   -2.70    3.57
 -13 -10   0  -15.54    5.47
  13  10   0    4.39    5.42
 -10  13   0    1.86    6.40
 -10  13   0    0.57    6.56
 -13  -9   0   11.46    6.56
  -9  13   0   -0.36    6.24
  -9  13   0   12.85    6.31
  13   9   0    0.84    5.03
   9 -13   0   12.55    4.20
  -8  13   0   11.68    6.60
 -13  -8   0   13.70    5.95
   8 -13   0    6.55    4.23
  13   8   0   15.31    5.15
  -8  13   0   10.36    5.95
  -7  13   0  914.70   41.39
 -13  -7   0  877.30   40.21
  13   7   0  931.82   39.63
  -7  13   0  929.01   40.44
   7 -13   0  923.32   38.61
   6 -13   0    4.17    4.38
  13   6   0   -2.96    3.90
  -6  13   0   -5.06    5.08
 -13  -6   0    6.64    5.11
  -6  13   0    4.05    5.37
   5 -13   0  711.30   31.18
 -13  -5   0  724.02   32.51
 -13  -5   0  689.60   31.61
  -5  13   0  662.55   32.68
  -5  13   0  743.42   32.25
   4 -13   0   21.01    5.29
  -4  13   0   11.64    5.56
 -13  -4   0   18.59    5.11
 -13  -4   0   13.15    5.72
  -4  13   0   14.04    5.82
 -13  -3   0 2228.71   91.91
 -13  -3   0 2177.73   89.78
 -13  -3   0 2322.99   88.92
  -3  13   0 2222.78   90.44
  -3  13   0 2229.42   89.22
   3 -13   0 2282.71   89.34
   2 -13   0   27.22    6.07
 -13  -2   0   26.87    5.83
 -13  -2   0   19.30    4.64
  -2  13   0   18.51    4.90
 -13  -2   0   24.64    7.00
  -2  13   0   22.38    5.45
 -13  -1   0   28.28    6.91
   1 -13   0   13.71    5.56
 -13  -1   0   19.50    4.35
  -1  13   0   21.70    5.18
  -1  13   0   27.33    5.73
 -13  -1   0   17.29    5.20
   0  13   0    8.57    4.19
 -13   0   0   -1.36    4.61
   0 -13   0    4.54    5.04
 -13   0   0   -0.15    4.69
 -13   0   0    2.95    3.39
   0  13   0    1.27    4.59
 -13   0   0    6.91    5.73
   1  13   0  126.15   11.35
 -13   1   0  115.08   12.24
 -13   1   0  117.91   10.87
 -13   1   0  115.36   10.38
  -1 -13   0  140.64   11.47
   1  13   0  140.14    9.62
 -13   1   0  123.51    8.17
 -13   2   0   50.52    9.04
   2  13   0   31.90    6.37
  -2 -13   0   32.05    6.76
   2  13   0   44.08    6.04
 -13   2   0   37.56    6.73
  13  -2   0   51.15    5.15
 -13   2   0   31.59    6.10
 -13   3   0  169.70   12.15
  13  -3   0  189.06   10.18
  -3 -13   0  176.79   12.91
   3  13   0  186.49   13.76
   3  13   0  197.21   11.48
 -13   3   0  162.44   12.29
  13  -4   0   -1.30    2.52
   4  13   0   -2.41    5.14
   4  13   0    1.90    4.06
 -13   4   0   -0.52    4.46
  -4 -13   0    0.94    5.15
 -13   4   0   -6.45    5.40
  13  -5   0  666.20   27.69
 -13   5   0  624.59   30.71
  -5 -13   0  650.53   31.37
   5  13   0  688.69   31.54
 -13   5   0  673.75   30.51
   5  13   0  661.86   29.31
 -13   6   0    1.01    4.90
   6  13   0   -7.34    5.46
  -6 -13   0    0.66    5.65
  13  -6   0   -1.69    2.63
 -13   6   0    2.61    5.19
   6  13   0   -3.55    4.14
  -7 -13   0  423.90   23.54
 -13   7   0  464.32   23.14
   7  13   0  437.83   23.65
  13  -7   0  442.73   18.97
 -13   7   0  438.12   23.69
   7  13   0  447.22   21.81
 -13   8   0   19.79    6.32
  13  -8   0   20.65    3.61
  -8 -13   0   14.71    6.74
 -13   8   0   29.57    7.03
   8  13   0   10.58    5.53
   8  13   0   15.31    7.33
  13  -9   0  123.55    7.66
 -13   9   0  134.67   12.18
  -9 -13   0  115.36   12.60
   9  13   0  169.37   14.38
   9  13   0  118.67   10.84
 -13   9   0  141.78   12.41
  13 -10   0   14.84    3.58
 -10 -13   0    4.59    7.90
  10  13   0   12.48    6.72
 -13  10   0   14.86    7.30
 -13  10   0    8.25    6.45
  10  13   0   13.09    5.79
 -11 -13   0   20.87    7.71
 -13  11   0   28.29    8.29
  11  13   0   14.82    7.48
  11  13   0   17.97    6.46
 -13  11   0   16.22    7.37
  12  13   0   -3.89    5.65
 -13  12   0   -4.86    6.50
  12  13   0   -3.15    6.49
 -12 -13   0   12.36    7.24
 -13  12   0    0.90    6.88
  13  13   0  241.84   17.47
 -13 -13   0  235.94   16.97
 -13  13   0  215.27   16.73
  13  13   0  198.89   15.91
 -13  13   0  215.14   16.49
  14  13   0   -4.15    6.04
  14  13   0    2.74    6.40
 -14 -13   0   -5.91    6.87
 -13  14   0   10.81    7.01
 -13  14   0   -3.74    6.80
  14  12   0  283.65   18.77
 -12  14   0  328.42   21.26
  14  12   0  346.74   21.98
 -14 -12   0  322.78   20.94
 -12  14   0  341.13   21.15
  14  11   0    2.78    6.89
 -11  14   0    2.20    6.86
 -14 -11   0    7.88    7.40
  11 -14   0   10.10    4.14
 -11  14   0  -10.27    6.10
  14  11   0    6.01    5.85
 -14 -10   0  413.24   23.20
  10 -14   0  436.04   20.03
 -10  14   0  447.53   25.06
 -10  14   0  408.18   23.58
  14  10   0  410.32   22.25
  14   9   0    1.45    5.15
 -14  -9   0   -4.80    5.15
  -9  14   0   -1.70    5.52
  -9  14   0   -4.11    6.00
   9 -14   0    0.97    4.01
  14   8   0   32.16    6.65
  -8  14   0   34.52    7.97
  -8  14   0   19.92    7.34
 -14  -8   0   30.20    7.37
   8 -14   0   26.04    5.67
  14   7   0   15.09    5.77
   7 -14   0   10.59    4.62
 -14  -7   0   15.13    6.30
  -7  14   0   13.25    6.51
  -7  14   0    9.24    6.23
  -6  14   0   93.15   10.20
   6 -14   0  101.11    8.81
  14   6   0   75.07    8.52
 -14  -6   0   86.35    9.17
  -6  14   0   94.38   10.62
 -14  -5   0    3.16    5.04
 -14  -5   0    1.03    4.75
  -5  14   0    5.30    5.06
  -5  14   0    1.88    5.59
   5 -14   0    6.66    4.89
 -14  -4   0  905.46   40.46
  -4  14   0  910.44   41.27
   4 -14   0  935.19   39.65
  -4  14   0  913.96   39.88
 -14  -4   0  909.94   39.31
   3 -14   0   13.93    5.67
  -3  14   0   17.50    5.88
  -3  14   0   20.85    6.31
 -14  -3   0   11.66    4.85
 -14  -3   0   17.36    7.27
 -14  -3   0   18.80    6.35
  -2  14   0  493.89   23.46
   2 -14   0  484.63   23.81
 -14  -2   0  492.21   26.01
 -14  -2   0  465.96   22.40
 -14  -2   0  474.63   24.26
  -2  14   0  491.76   24.93
  -1  14   0    5.50    4.92
 -14  -1   0    3.37    4.88
  -1  14   0    4.99    4.65
 -14  -1   0    1.91    3.77
 -14  -1   0   11.68    7.40
   1 -14   0    7.90    5.47
   0  14   0  116.96   10.68
 -14   0   0   81.97    9.40
   0  14   0  114.44    9.28
 -14   0   0  108.63    8.20
   0 -14   0   95.96    9.85
 -14   0   0  100.64   12.40
 -14   1   0   14.72    6.91
   1  14   0   11.05    4.66
   1  14   0   18.14    6.22
 -14   1   0   16.98    5.52
   2  14   0  398.76   20.34
  14  -2   0  430.71   19.44
  -2 -14   0  412.83   22.03
 -14   2   0  434.25   24.11
   2  14   0  413.56   22.75
 -14   2   0  451.41   22.30
 -14   2   0  397.19   21.50
   3  14   0    3.52    5.31
  -3 -14   0   -7.15    4.98
  14  -3   0    1.85    2.93
 -14   3   0   -4.08    4.47
   3  14   0    2.06    4.32
 -14   3   0   -0.82    7.52
 -14   3   0   13.12    6.49
   4  14   0  359.02   21.83
  -4 -14   0  430.72   22.05
   4  14   0  387.29   19.38
 -14   4   0  386.06   21.67
  14  -4   0  410.10   18.37
 -14   4   0  388.75   20.57
   5  14   0    2.77    6.05
  -5 -14   0   11.51    6.10
 -14   5   0   -0.55    5.43
   5  14   0   -5.01    4.28
 -14   5   0   -4.49    4.58
  14  -5   0   -6.79    2.48
  -6 -14   0  127.50   12.42
   6  14   0  100.74   11.01
   6  14   0  107.07    9.67
  14  -6   0  116.65    7.37
 -14   6   0  104.93   10.35
 -14   6   0  125.11   12.25
   7  14   0   -2.57    4.63
 -14   7   0   -7.02    4.91
   7  14   0   -3.16    5.53
  -7 -14   0    2.48    6.39
 -14   7   0   -4.18    5.47
  14  -7   0    0.63    2.77
  -8 -14   0  252.34   18.19
 -14   8   0  261.05   16.63
   8  14   0  273.83   15.41
  14  -8   0  247.01   12.07
   8  14   0  241.88   17.33
 -14   8   0  267.43   18.02
  -9 -14   0    3.79    6.97
   9  14   0   -7.75    4.83
 -14   9   0   -9.75    5.67
   9  14   0   -0.70    6.10
 -14   9   0   -3.42    6.45
 -14  10   0  567.00   28.74
 -10 -14   0  543.90   30.11
  10  14   0  562.46   30.24
  10  14   0  589.10   27.83
 -14  10   0  564.39   29.12
 -14  11   0    9.04    6.85
  11  14   0    8.73    5.94
 -14  11   0   -3.49    6.06
  11  14   0    5.30    6.62
 -11 -14   0   -2.66    6.68
  12  14   0   73.47    9.74
  12  14   0   71.53   11.39
 -14  12   0   80.46   10.85
 -14  12   0   72.88   10.78
 -12 -14   0   72.23   11.16
 -13 -14   0   10.19    8.07
 -14  13   0    2.30    6.24
 -14  13   0    0.03    6.12
  13  14   0    3.35    5.67
  13  14   0   -0.90    6.33
  14  14   0   23.58    9.06
 -14  14   0   23.89    8.31
 -14 -14   0   32.84    8.86
  14  14   0   34.21    8.26
 -14  14   0   22.94    8.84
 -14  15   0   -3.99    6.46
 -15 -14   0   -5.78    6.47
 -14  15   0    0.78    6.81
  15  14   0    7.16    8.16
  15  14   0    0.20    6.24
 -13  15   0  431.50   26.08
 -13  15   0  472.00   26.43
  15  13   0  457.90   26.57
  15  13   0  457.29   25.15
 -15 -13   0  430.86   26.25
 -12  15   0   -6.11    7.00
  15  12   0   -6.45    6.95
  15  12   0   11.50    6.45
 -15 -12   0   -1.91    7.21
 -12  15   0   -8.71    6.74
 -11  15   0  408.35   23.73
  15  11   0  344.38   22.20
 -15 -11   0  360.64   22.60
  15  11   0  410.96   21.72
 -11  15   0  365.41   22.05
  10 -15   0    5.86    4.35
 -10  15   0   18.20    7.77
 -15 -10   0    6.59    6.13
 -10  15   0    8.80    6.53
  15  10   0   12.32    6.21
  -9  15   0   40.86    9.44
   9 -15   0   41.31    6.25
  -9  15   0   42.76    8.39
  15   9   0   22.91    6.78
 -15  -9   0   39.82    8.38
  -8  15   0    1.41    6.46
  -8  15   0   -7.49    6.21
   8 -15   0   -2.49    4.14
 -15  -8   0   -2.45    5.01
  15   8   0   -3.93    5.14
   7 -15   0   50.08    7.05
 -15  -7   0   45.34    7.69
  -7  15   0   59.14    9.58
  -7  15   0   50.16    8.76
  15   7   0   66.76    8.42
  15   6   0   -8.41    4.84
 -15  -6   0    5.48    5.60
   6 -15   0    7.80    5.20
  -6  15   0    4.31    5.95
  -6  15   0    4.15    6.28
  -5  15   0  436.30   22.19
 -15  -5   0  401.23   21.20
 -15  -5   0  411.04   22.05
  -5  15   0  376.53   22.72
   5 -15   0  429.83   21.09
 -15  -4   0   -1.27    4.43
  -4  15   0    9.15    6.00
 -15  -4   0   17.96    6.03
  -4  15   0   -1.30    5.35
   4 -15   0   -0.47    4.79
  -3  15   0    9.48    5.79
  -3  15   0    2.95    5.79
 -15  -3   0   12.99    6.28
   3 -15   0    7.90    5.60
 -15  -3   0    6.13    7.18
 -15  -3   0   18.67    5.38
  -2  15   0   -6.96    4.80
 -15  -2   0    2.48    5.21
 -15  -2   0    8.35    6.80
 -15  -2   0   -0.95    4.13
   2 -15   0    4.84    4.91
  -2  15   0  -10.05    4.72
  -1  15   0  211.14   13.67
 -15  -1   0  218.92   14.39
  -1  15   0  210.08   14.72
   1 -15   0  198.47   14.54
 -15  -1   0  208.59   17.38
 -15  -1   0  211.01   12.64
 -15   0   0   23.30    7.16
   0  15   0   28.94    6.12
   0  15   0   26.52    7.41
 -15   0   0   23.80    5.08
 -15   0   0   17.92    7.68
   0 -15   0   29.36    7.45
 -15   1   0 1174.27   47.01
 -15   1   0 1087.50   51.12
 -15   1   0 1120.11   49.64
 -15   1   0 1185.23   49.49
   1  15   0 1187.63   50.59
  -1 -15   0 1115.79   49.61
   1  15   0 1162.83   48.19
   2  15   0    3.20    5.20
 -15   2   0    0.52    7.16
 -15   2   0   14.13    6.18
 -15   2   0   12.33    5.52
   2  15   0   21.00    5.74
  -2 -15   0    4.28    5.96
  15  -2   0   18.22    3.97
  15  -3   0   89.64    7.12
  -3 -15   0   65.59    9.32
 -15   3   0   72.36    9.46
   3  15   0   75.32    9.69
 -15   3   0  105.67   13.02
   3  15   0   76.55    8.18
 -15   3   0   69.97    8.69
 -15   4   0    6.73    5.37
 -15   4   0   -3.04    5.52
  -4 -15   0    6.51    6.16
   4  15   0    9.33    6.64
  15  -4   0    8.39    3.49
   4  15   0   10.20    5.04
   5  15   0   29.23    5.94
  -5 -15   0   14.52    7.20
 -15   5   0   31.75    7.66
  15  -5   0   24.64    4.21
   5  15   0   22.08    7.63
 -15   5   0   32.59    6.98
  15  -6   0    2.28    3.04
  -6 -15   0    6.48    6.60
   6  15   0   -5.31    4.80
 -15   6   0   -4.70    4.89
 -15   6   0   -4.40    6.36
   6  15   0   -8.85    5.20
  -7 -15   0  243.44   17.50
   7  15   0  257.81   17.82
 -15   7   0  251.90   16.44
 -15   7   0  273.22   17.56
   7  15   0  262.96   15.39
   8  15   0   -4.09    4.80
   8  15   0   -1.52    6.61
  -8 -15   0    0.53    6.41
 -15   8   0   -9.17    5.55
 -15   8   0   -4.44    5.52
   9  15   0  377.84   23.32
  -9 -15   0  379.65   22.79
 -15   9   0  387.21   22.21
 -15   9   0  354.56   21.46
   9  15   0  355.88   19.70
 -10 -15   0  -10.46    6.43
 -15  10   0   -5.63    6.81
  10  15   0    9.68    7.02
  10  15   0   11.18    6.24
 -15  10   0   11.08    6.78
  11  15   0  340.79   22.57
 -15  11   0  312.25   20.34
 -11 -15   0  335.26   22.25
 -15  11   0  332.94   21.58
  11  15   0  342.58   19.38
  12  15   0    0.77    5.92
 -15  12   0   14.25    8.22
 -15  12   0    1.05    6.45
 -12 -15   0   -1.72    6.59
  12  15   0    2.47    7.02
  13  15   0   11.67    6.78
  13  15   0   25.21    8.37
 -13 -15   0   14.43    8.74
 -15  13   0   -8.56    6.28
 -15  13   0   10.49    7.44
  14  15   0   10.82    7.82
 -15  14   0   29.48    8.42
 -14 -15   0    3.52    7.41
  14  15   0    8.63    6.73
 -15  14   0    6.52    7.47
  15  15   0   67.31   10.14
 -15 -15   0   49.95   11.69
  15  15   0   63.71   11.39
 -15  15   0   74.69   11.38
 -15  15   0   62.36   11.01
  16  15   0    5.53    7.80
 -15  16   0    6.58    8.18
  16  15   0   -2.68    6.80
 -15  16   0   -5.48    7.14
 -16 -15   0    7.15    7.81
 -14  16   0   99.44   12.63
 -14  16   0   92.66   12.45
  16  14   0  114.19   12.75
  16  14   0   76.92   11.89
 -16 -14   0   95.62   13.17
  16  13   0   -1.19    7.50
 -13  16   0   13.66    7.47
  16  13   0   -1.37    6.57
 -13  16   0   10.46    7.77
 -16 -13   0  -10.95    6.90
 -12  16   0  119.40   13.92
 -12  16   0  125.97   13.55
  16  12   0  119.77   13.68
 -16 -12   0  135.30   14.49
  16  12   0  117.08   12.47
 -16 -11   0    5.12    6.51
 -11  16   0    2.71    7.03
  16  11   0    1.01    7.13
  16  11   0   -1.39    6.15
 -11  16   0    7.90    7.69
 -10  16   0   99.10   13.06
  10 -16   0  101.14    8.62
 -16 -10   0  109.84   12.29
  16  10   0  127.33   12.18
 -10  16   0   78.93   11.31
 -16  -9   0    6.67    7.00
  -9  16   0   13.01    7.47
  16   9   0    0.72    5.76
  -9  16   0    3.95    7.43
   9 -16   0   -1.19    4.25
 -16  -8   0  489.34   26.06
   8 -16   0  499.69   24.01
  -8  16   0  534.07   28.67
  -8  16   0  477.60   26.43
  16   8   0  511.52   25.62
 -16  -7   0   10.36    6.52
  -7  16   0   -3.70    5.34
  -7  16   0    9.21    7.04
   7 -16   0   -1.69    4.39
  16   7   0   13.46    6.12
   6 -16   0  334.42   17.99
  -6  16   0  321.64   20.84
 -16  -6   0  322.78   18.91
  16   6   0  344.70   19.03
  -6  16   0  320.11   19.38
 -16  -5   0   -3.09    4.15
  -5  16   0   -2.84    5.75
   5 -16   0    0.57    5.18
 -16  -5   0    4.45    6.50
  -5  16   0   -2.05    5.85
 -16  -4   0  232.15   15.44
   4 -16   0  225.61   14.86
  -4  16   0  217.42   16.87
  -4  16   0  233.73   14.78
 -16  -4   0  221.54   14.37
   3 -16   0    5.75    5.77
 -16  -3   0    1.40    8.21
  -3  16   0    5.22    6.28
  -3  16   0   -0.63    5.66
 -16  -3   0   -4.49    4.56
 -16  -3   0    1.51    6.51
  -2  16   0    9.91    6.78
 -16  -2   0    5.60    6.63
  -2  16   0   14.38    6.19
   2 -16   0   16.11    6.15
 -16  -2   0   19.99    5.47
 -16  -2   0   12.48    8.93
 -16  -1   0    7.23    5.88
  -1  16   0    1.77    5.27
 -16  -1   0    1.68    4.13
  -1  16   0    7.49    5.66
 -16  -1   0   16.28    8.69
   1 -16   0    0.18    5.30
 -16   0   0  245.79   14.26
   0  16   0  249.10   15.49
 -16   0   0  273.04   20.06
   0  16   0  259.96   17.48
   0 -16   0  273.40   17.40
 -16   0   0  268.35   16.98
  -1 -16   0   10.21    7.01
   1  16   0   21.26    6.03
 -16   1   0    6.46    5.95
 -16   1   0    2.00    7.45
   1  16   0   14.55    6.91
   2  16   0  176.88   12.40
  16  -2   0  194.82   11.12
   2  16   0  158.94   13.83
 -16   2   0  183.15   17.20
  -2 -16   0  161.87   13.76
 -16   2   0  173.37   14.29
 -16   2   0  177.25   14.71
 -16   3   0    9.18    8.48
  16  -3   0    2.98    3.20
   3  16   0    0.06    4.71
  -3 -16   0   -2.74    5.61
 -16   3   0    1.77    5.78
   3  16   0    5.99    6.67
 -16   3   0   -4.64    5.16
 -16   4   0   -7.20    6.29
  16  -4   0   16.62    4.20
  -4 -16   0    7.08    7.37
 -16   4   0    7.84    9.50
 -16   4   0    1.75    5.42
   4  16   0   12.11    6.56
   4  16   0    9.51    5.64
   5  16   0   -1.99    6.61
  16  -5   0   -3.83    2.98
 -16   5   0   -1.77    6.55
 -16   5   0   10.74    6.03
  -5 -16   0    4.88    6.59
   5  16   0    4.90    5.13
 -16   6   0   24.64    8.29
  -6 -16   0   12.79    7.42
   6  16   0   -0.94    5.99
   6  16   0   13.13    5.99
 -16   6   0   22.75    6.62
 -16   7   0   -0.35    5.54
 -16   7   0   -1.69    6.28
   7  16   0   11.41    7.60
   7  16   0   -1.08    5.18
  -7 -16   0    4.43    7.15
  -8 -16   0  207.57   17.05
   8  16   0  214.78   17.17
 -16   8   0  251.64   17.27
   8  16   0  234.22   15.03
 -16   8   0  231.09   16.39
  -9 -16   0    4.57    7.36
 -16   9   0   -8.08    6.26
 -16   9   0   -5.86    5.95
   9  16   0   -2.15    5.54
   9  16   0   -0.41    6.70
 -16  10   0  630.62   34.29
 -10 -16   0  726.78   36.37
  10  16   0  698.42   35.97
  10  16   0  676.81   32.04
 -16  10   0  725.85   34.05
  11  16   0   -5.07    6.38
 -11 -16   0    4.45    7.15
  11  16   0    2.31    5.99
 -16  11   0    1.44    6.45
 -16  11   0    3.93    7.84
  12  16   0   38.23    9.28
 -12 -16   0   49.68    9.88
 -16  12   0   39.94    9.70
 -16  12   0   36.09    8.56
  12  16   0   45.27    8.64
  13  16   0   21.49    7.42
 -16  13   0    7.15    8.23
  13  16   0   38.35   10.05
 -16  13   0   10.16    7.37
 -13 -16   0   20.62    9.49
 -16  14   0   25.07    8.55
  14  16   0   61.19    9.46
  14  16   0   34.55    9.70
 -16  14   0   39.33    9.40
 -14 -16   0   44.40    9.94
 -15 -16   0   12.71    9.09
 -16  15   0    8.18    7.56
  15  16   0    5.15    7.91
  15  16   0   -3.04    6.71
 -16  15   0    4.93    6.99
 -16  16   0   61.00   16.60
  16  16   0   84.55   11.59
  16  16   0   76.36   12.60
 -16 -16   0   85.56   12.82
 -16  16   0   89.66   13.30
  17  16   0  -15.09    7.98
 -17 -16   0   -2.60    8.42
  17  16   0   -7.38    6.93
 -16  17   0    1.52    7.46
  17  15   0  263.29   22.21
 -15  17   0  222.24   19.87
 -15  17   0  265.57   19.65
  17  15   0  236.75   18.56
 -17 -15   0  287.38   20.43
 -14  17   0   10.90    7.76
 -14  17   0   -2.95    7.60
 -17 -14   0   19.03    9.24
  17  14   0    2.31    8.73
  17  14   0   20.37    8.15
  17  13   0   34.39    8.53
 -17 -13   0   39.23    9.80
  17  13   0   49.47    9.86
 -13  17   0   67.14   11.44
 -13  17   0   36.74    9.62
 -12  17   0    7.00    7.55
 -12  17   0    8.41    6.95
 -17 -12   0    5.36    7.36
  17  12   0   10.74    6.64
  17  12   0    2.97    6.95
 -11  17   0   -2.37    7.03
  17  11   0    3.81    7.48
  17  11   0    8.02    6.61
 -11  17   0   -2.96    6.86
 -17 -11   0   11.99    6.76
 -10  17   0   10.33    7.46
  17  10   0   -3.20    5.65
 -17 -10   0   -5.80    5.41
 -10  17   0    7.95    7.25
  10 -17   0   -4.11    6.19
  -9  17   0  231.47   16.52
   9 -17   0  212.94   13.82
 -17  -9   0  252.03   16.54
  17   9   0  219.52   15.87
  -9  17   0  254.21   19.68
   8 -17   0    9.17    5.28
  17   8   0   16.79    6.60
  -8  17   0    8.80    7.20
  -8  17   0   11.37    7.29
 -17  -8   0    5.13    6.37
  17   7   0  605.36   29.64
  -7  17   0  605.93   30.49
   7 -17   0  606.66   28.65
  -7  17   0  617.83   32.21
 -17  -7   0  595.37   29.57
 -17  -6   0   -3.08    4.59
   6 -17   0   -6.50    4.58
  -6  17   0    2.55    5.55
  -6  17   0   -0.36    6.69
  17   6   0    2.77    5.97
 -17  -5   0  163.30   12.97
  -5  17   0  188.30   14.34
   5 -17   0  167.42   12.75
  -5  17   0  187.19   15.81
 -17  -5   0  151.56   13.49
  -4  17   0    1.64    5.99
  -4  17   0   12.60    7.14
 -17  -4   0   10.01    5.31
   4 -17   0    5.22    5.62
 -17  -4   0   16.51    7.01
   3 -17   0   16.59    6.75
  -3  17   0    7.70    6.73
 -17  -3   0   28.16    6.42
 -17  -3   0   23.51    9.03
  -3  17   0   15.93    6.49
 -17  -3   0   14.80    6.53
  -2  17   0    8.63    6.18
 -17  -2   0   23.99    5.91
 -17  -2   0   12.01    7.22
  -2  17   0    8.46    7.00
   2 -17   0   10.34    6.46
 -17  -2   0    8.06    8.12
   1 -17   0   94.52   10.86
  -1  17   0  108.08   12.12
 -17  -1   0  106.10   14.44
 -17  -1   0  113.78    9.77
 -17  -1   0  103.53   11.65
  -1  17   0  103.61   10.43
   0 -17   0   26.97    7.41
   0  17   0   20.15    7.71
   0  17   0   18.79    6.52
 -17   0   0   22.18    5.43
 -17   0   0   20.25    7.07
 -17   0   0   23.16    8.89
  17  -1   0  222.26   12.55
 -17   1   0  214.90   16.38
  -1 -17   0  201.74   15.25
   1  17   0  199.60   16.00
   1  17   0  212.88   14.54
 -17   1   0  201.63   18.79
  -2 -17   0    5.59    6.28
   2  17   0   10.96    7.03
 -17   2   0    8.30    5.91
 -17   2   0   -4.69    8.04
 -17   2   0   -1.88    6.49
   2  17   0   -0.83    5.13
 -17   3   0   85.05   11.50
 -17   3   0   93.52   10.29
  17  -3   0   92.90    8.45
 -17   3   0   76.18   12.31
  -3 -17   0  100.58   11.70
   3  17   0  109.79   10.28
   3  17   0   81.22   10.94
 -17   4   0    8.17    5.77
 -17   4   0   10.39    6.95
  17  -4   0    7.39    4.05
   4  17   0    5.85    5.35
  -4 -17   0   -0.80    6.75
 -17   4   0    5.89    9.36
   4  17   0    8.10    6.67
 -17   5   0   11.55    6.19
   5  17   0   18.89    7.95
   5  17   0   16.19    6.14
  -5 -17   0   19.99    7.90
 -17   5   0   16.84   10.79
 -17   5   0    9.96    6.78
   6  17   0   19.18    7.64
 -17   6   0    6.29    5.82
  -6 -17   0    3.74    7.86
 -17   6   0    1.28    6.39
   6  17   0   -1.53    5.35
   7  17   0    7.59    5.74
 -17   7   0   -2.62    5.41
   7  17   0   -0.68    6.97
  -7 -17   0   19.54    8.75
 -17   7   0   -5.43    6.35
  -8 -17   0   -7.51    6.28
   8  17   0    0.40    6.55
 -17   8   0   -2.29    5.98
   8  17   0   -8.27    5.48
 -17   8   0   -2.44    6.38
 -17   9   0  309.59   19.28
  -9 -17   0  294.41   20.82
 -17   9   0  299.49   20.38
   9  17   0  340.15   18.69
   9  17   0  297.88   21.12
 -17  10   0    6.85    6.83
  10  17   0   14.97    8.72
  10  17   0   14.76    6.47
 -10 -17   0   16.52    9.50
 -17  10   0   10.16    7.65
 -11 -17   0  214.12   18.24
  11  17   0  220.24   18.21
 -17  11   0  212.32   16.22
 -17  11   0  216.27   17.26
  11  17   0  184.82   14.23
 -12 -17   0   -8.56    6.51
 -17  12   0   -7.54    6.01
  12  17   0   -4.69    7.73
  12  17   0    0.36    6.22
 -17  12   0    0.15    6.84
 -13 -17   0  137.68   15.17
 -17  13   0  133.30   15.44
  13  17   0  102.67   14.76
 -17  13   0  114.40   12.58
  13  17   0  121.93   12.46
  14  17   0    2.79    6.82
 -17  14   0   -1.66    6.42
  14  17   0   -8.82    6.58
 -14 -17   0    2.30    7.53
 -17  14   0   -0.98    7.17
  15  17   0   68.53   10.74
  15  17   0   62.87   12.14
 -17  15   0   62.48   11.58
 -15 -17   0   66.81   12.56
  16  17   0   -8.07    9.45
 -16 -17   0    3.47    8.00
  16  17   0   -8.71    7.91
 -17  16   0   14.99    9.20
  17  17   0   90.76   14.92
 -17  17   0   48.67   11.26
 -17 -17   0   51.73   12.40
 -17  18   0    9.40    9.31
  18  17   0   -2.64    8.31
 -18 -17   0    3.00    7.89
  18  16   0  290.11   23.87
  18  16   0  267.57   28.58
 -16  18   0  302.55   21.47
 -18 -16   0  251.06   21.76
  18  15   0   14.11   10.01
 -18 -15   0   -2.61    8.74
  18  15   0   21.89    8.84
 -15  18   0   14.99    9.24
 -14  18   0  226.15   20.61
 -18 -14   0  281.81   21.50
  18  14   0  289.76   21.60
 -14  18   0  307.01   21.68
  18  14   0  284.20   19.86
 -13  18   0    1.81    7.78
  18  13   0   -4.04    7.26
 -13  18   0    6.18    8.31
  18  13   0   11.18    7.05
 -18 -13   0    2.97    7.89
 -18 -12   0   -3.21    7.12
  18  12   0    4.76    6.39
  18  12   0   13.41    7.61
 -12  18   0    4.97    6.93
 -12  18   0   -8.73    6.54
 -11  18   0   14.70    8.86
 -11  18   0    6.23    7.52
  18  11   0   -3.85    5.65
  18  11   0   14.21    8.30
 -18 -11   0   24.61    7.43
 -10  18   0   16.64    8.83
 -10  18   0   24.39    7.96
 -18 -10   0   14.86    7.31
  18  10   0   40.86    8.67
  18   9   0    0.62    5.68
   9 -18   0   -3.67    4.41
  -9  18   0   -3.57    6.68
 -18  -9   0    5.85    6.68
  -9  18   0    5.29    7.89
   8 -18   0  133.96   11.13
 -18  -8   0  105.15   12.25
  18   8   0  112.22   12.12
  -8  18   0  135.31   14.69
  -8  18   0  133.65   13.66
   7 -18   0   -0.87    5.09
 -18  -7   0   -0.50    6.02
  -7  18   0   -2.80    6.66
  -7  18   0   -3.76    6.76
  18   7   0    3.73    5.69
 -18  -6   0  343.87   20.61
   6 -18   0  374.76   20.07
  18   6   0  353.99   20.78
  -6  18   0  388.29   23.70
  -6  18   0  356.11   20.76
 -18  -5   0    3.14    5.44
   5 -18   0   -2.72    5.10
  -5  18   0   -2.75    6.42
  -5  18   0    1.04    6.54
 -18  -4   0  142.08   11.74
  -4  18   0  149.33   15.12
  -4  18   0  148.31   12.77
 -18  -4   0  127.50   12.99
   4 -18   0  130.15   11.96
 -18  -3   0   -4.03    4.28
 -18  -3   0    7.54    7.16
  -3  18   0   -3.38    4.89
  -3  18   0   -0.31    6.19
   3 -18   0    3.03    5.95
 -18  -2   0   35.84    6.72
 -18  -2   0   43.06   10.65
  -2  18   0   39.06    7.79
 -18  -2   0   34.98    8.23
   2 -18   0   22.24    7.47
  -2  18   0   31.19    8.69
 -18  -1   0   22.21    7.60
  -1  18   0    6.45    6.01
 -18  -1   0    3.27    4.96
 -18  -1   0   19.11    9.98
   1 -18   0   10.58    7.06
  -1  18   0   14.96    7.58
   0 -18   0  426.55   24.45
   0  18   0  471.96   23.14
 -18   0   0  412.00   27.27
 -18   0   0  471.34   21.76
 -18   0   0  413.58   24.59
   0  18   0  402.12   24.64
   1  18   0    0.55    5.30
  -1 -18   0    2.89    7.12
 -18   1   0    0.06    6.37
  18  -1   0    3.10    3.58
   1  18   0    3.58    6.42
 -18   1   0   11.88    9.28
  -2 -18   0  241.34   18.73
 -18   2   0  282.34   20.79
 -18   2   0  270.87   18.22
   2  18   0  257.46   16.56
  18  -2   0  288.22   15.21
   2  18   0  266.50   19.75
 -18   3   0    7.04    9.24
 -18   3   0    3.29    6.04
  18  -3   0   13.87    5.40
  -3 -18   0    6.23    7.30
 -18   3   0    2.87    6.73
   3  18   0    4.47    5.82
   3  18   0    5.18    6.39
 -18   4   0  120.87   12.43
  -4 -18   0  121.14   13.55
 -18   4   0  151.48   14.75
   4  18   0  141.88   14.76
 -18   4   0  163.72   17.68
   4  18   0  144.22   11.74
 -18   5   0    5.98    8.75
 -18   5   0    9.80    6.17
 -18   5   0   -3.70    6.92
  -5 -18   0   19.22    8.40
   5  18   0   -5.45    5.11
   5  18   0   -1.41    6.28
  -6 -18   0  155.66   15.19
   6  18   0  135.12   11.94
 -18   6   0  133.47   13.75
 -18   6   0  116.90   12.32
   6  18   0  119.44   13.57
   7  18   0    2.86    5.96
  -7 -18   0    9.37    7.52
 -18   7   0   -3.86    7.33
 -18   7   0   -3.26    5.58
   7  18   0   -2.15    7.40
   8  18   0   96.20   10.20
 -18   8   0  101.18   12.60
   8  18   0   74.02   11.64
 -18   8   0   84.59   10.66
  -8 -18   0   87.79   13.11
   9  18   0   -1.97    6.52
 -18   9   0    3.69    7.38
 -18   9   0    3.62    6.14
   9  18   0    2.10    5.61
  -9 -18   0   -7.44    8.23
 -18  10   0   49.59   10.56
  10  18   0   54.07   11.41
 -10 -18   0   49.03   10.56
  10  18   0   51.13    8.73
 -18  10   0   53.56    9.29
 -18  11   0    2.30    6.38
  11  18   0    1.84    5.87
  11  18   0   -7.28    7.17
 -11 -18   0   -5.20    6.65
 -18  11   0    5.29    7.23
  12  18   0   13.97    9.30
 -18  12   0   21.44    7.56
  12  18   0   15.82    6.52
 -12 -18   0   21.65    9.64
 -18  12   0   13.72    8.05
  13  18   0   13.34    6.77
  13  18   0   -3.44    7.97
 -13 -18   0   -5.92    8.08
 -18  13   0  -14.47    5.52
 -18  13   0    5.50    8.17
  14  18   0  275.50   20.47
 -18  14   0  257.34   20.10
 -14 -18   0  256.90   20.32
  14  18   0  245.93   22.00
 -18  15   0    7.36    8.07
 -15 -18   0  -11.21    6.71
  15  18   0   -6.16    7.60
 -16 -18   0   66.99   13.22
 -18  16   0   68.02   13.37
  16  18   0   53.53   12.57
 -17 -18   0   -7.45    7.07
  17  18   0   -0.32    9.29
 -18  17   0   -1.48    7.37
 -16  19   0    6.83    8.74
  19  16   0   -0.90    8.48
 -19 -16   0   -0.62    8.14
 -15  19   0  242.64   19.69
  19  15   0  252.33   21.51
 -19 -15   0  257.73   21.20
  19  15   0  248.62   19.48
 -19 -14   0   16.22    8.46
  19  14   0  -10.87    7.56
 -14  19   0    0.47    7.89
  19  14   0    5.62    8.13
 -13  19   0   67.48   12.14
  19  13   0   48.16   11.00
  19  13   0   54.78   10.71
 -13  19   0   54.66   11.22
 -19 -13   0   87.02   12.92
  19  12   0   10.60    7.24
  19  12   0   -6.73    6.68
 -12  19   0   17.56    8.88
 -19 -12   0   -6.06    7.14
 -12  19   0    2.40    7.96
 -19 -11   0   36.38    9.34
 -11  19   0   35.90   10.50
  19  11   0   27.82    8.61
 -11  19   0   35.05    9.25
  19  11   0   39.28    8.69
 -19 -10   0   -1.52    6.70
  19  10   0   -5.83    5.92
 -10  19   0    8.21    7.75
 -10  19   0    9.65    8.26
  -9  19   0  100.04   11.96
  19   9   0   79.98   10.96
  -9  19   0   83.24   13.26
 -19  -9   0   83.57   11.27
  19   8   0    0.18    5.72
  -8  19   0    5.05    7.63
  -8  19   0    0.99    6.61
   8 -19   0    7.73    5.33
 -19  -8   0    0.67    6.17
 -19  -7   0  189.51   15.25
   7 -19   0  201.19   14.35
  -7  19   0  197.85   16.11
  -7  19   0  195.67   18.49
  19   7   0  208.92   15.31
  -6  19   0    1.43    6.51
  -6  19   0    4.02    7.68
  19   6   0   -6.20    5.91
   6 -19   0   14.18    6.22
 -19  -6   0    6.55    5.96
   5 -19   0  190.80   14.23
  -5  19   0  205.27   17.70
  -5  19   0  184.12   14.29
 -19  -5   0  175.05   14.18
  -4  19   0    0.33    6.14
 -19  -4   0    7.00    6.54
   4 -19   0   11.31    5.96
  -4  19   0    4.09    6.69
 -19  -4   0    5.84    5.48
 -19  -3   0   82.83   11.21
  -3  19   0  100.88   11.03
  -3  19   0   85.32   11.98
 -19  -3   0   78.64    9.51
   3 -19   0   86.13   10.63
   2 -19   0   11.17    6.67
 -19  -2   0   -1.27    6.44
  -2  19   0   11.29    6.58
 -19  -2   0  -10.32    8.65
  -2  19   0   10.07    7.37
 -19  -2   0    7.34    5.16
 -19  -1   0  234.72   14.62
 -19  -1   0  219.62   19.54
  -1  19   0  238.48   18.96
  -1  19   0  242.87   16.08
   1 -19   0  238.84   17.27
 -19  -1   0  234.87   17.91
   0  19   0   13.76    6.52
   0  19   0   22.69    8.38
  19   0   0   13.08    4.82
   0 -19   0   21.86    7.80
 -19   0   0   10.67    8.99
 -19   0   0   21.00    8.15
  -1 -19   0  127.08   13.45
   1  19   0  151.00   12.37
   1  19   0  128.33   14.47
 -19   1   0  164.82   17.89
 -19   1   0  137.40   14.06
  19  -1   0  156.02   10.85
 -19   2   0    3.84    9.70
 -19   2   0    6.08    6.95
   2  19   0   -0.19    7.16
  -2 -19   0    6.68    7.11
   2  19   0   12.76    6.49
  -3 -19   0   49.48    9.91
 -19   3   0   54.31    9.95
   3  19   0   51.08    8.43
 -19   3   0   50.36   11.43
   3  19   0   48.81   10.52
 -19   4   0    9.99   10.46
  -4 -19   0    0.88    7.12
 -19   4   0   22.53    8.03
 -19   4   0    6.57    6.37
   4  19   0    6.86    6.71
   4  19   0    7.16    6.01
   5  19   0  663.67   37.71
 -19   5   0  736.23   39.10
  -5 -19   0  760.35   38.08
 -19   5   0  782.01   35.86
   5  19   0  765.69   34.54
 -19   5   0  740.22   37.22
 -19   6   0    8.20   10.67
 -19   6   0   -2.13    7.47
   6  19   0    6.09    6.24
  -6 -19   0    0.46    7.28
 -19   6   0    9.93    6.83
   6  19   0   -2.27    7.37
   7  19   0  256.82   19.67
   7  19   0  270.67   16.89
 -19   7   0  262.38   18.32
 -19   7   0  276.25   19.48
  -7 -19   0  243.48   20.30
   8  19   0   -0.67    6.82
   8  19   0    0.10    5.71
 -19   8   0    3.37    8.09
  -8 -19   0    2.07    7.88
 -19   8   0   -7.71    5.69
 -19   9   0    9.81    6.23
   9  19   0   -5.11    5.27
   9  19   0    0.68    7.18
 -19   9   0    3.98    7.44
  -9 -19   0   -7.30    7.40
 -19  10   0   -8.35    7.45
 -10 -19   0   10.23    8.98
 -19  10   0   -1.10    6.13
  10  19   0   -0.93    5.53
  10  19   0   -6.52    7.23
 -11 -19   0    4.97    7.53
  11  19   0   -1.56    5.24
  11  19   0    1.83    7.97
 -19  11   0    4.17    8.53
 -19  11   0    3.63    6.03
 -19  12   0    4.16    7.60
  12  19   0  -10.76    7.77
 -12 -19   0  -12.02    6.51
 -19  12   0   -1.60    9.98
  12  19   0    0.28    6.83
 -19  13   0  253.12   21.04
  13  19   0  287.30   22.93
 -13 -19   0  254.21   20.90
  14  19   0    1.90    8.59
 -14 -19   0    7.99    9.69
 -19  14   0   11.25    8.12
 -19  15   0  113.85   14.75
  15  19   0  113.70   15.22
 -15 -19   0   86.46   14.91
 -19  16   0   -0.27    8.62
  16  19   0    4.68    8.55
 -16 -19   0   -9.13    7.39
  20  14   0   81.12   12.85
  20  14   0   73.02   13.75
 -14  20   0   83.54   12.74
 -20 -14   0   69.89   12.31
  20  13   0    0.36    7.39
 -13  20   0  -11.18    5.91
  20  13   0   -8.54    8.14
 -20 -13   0    4.74    8.19
 -12  20   0  167.18   17.06
  20  12   0  212.69   17.54
  20  12   0  205.68   19.67
 -20 -12   0  187.70   18.18
 -12  20   0  196.10   19.30
  20  11   0    4.93    8.36
 -11  20   0  -12.47    6.62
 -20 -11   0  -12.27    6.52
 -11  20   0   -3.27    7.84
  20  11   0    0.40    6.61
 -20 -10   0  201.73   17.30
 -10  20   0  217.62   19.95
  20  10   0  216.20   17.03
 -10  20   0  245.34   18.57
  -9  20   0   -2.19    7.91
 -20  -9   0    5.66    7.04
  20   9   0    6.51    6.69
  -9  20   0    0.99    7.22
 -20  -8   0   42.33    8.99
  -8  20   0   42.59   11.03
   8 -20   0   46.47    7.83
  20   8   0   48.81    9.20
  -8  20   0   23.82    8.51
  -7  20   0    7.63    7.73
 -20  -7   0   -3.49    5.92
   7 -20   0   -0.34    5.39
  -7  20   0    3.45    7.03
  20   7   0    7.02    6.44
  -6  20   0   30.80    9.86
   6 -20   0   33.95    7.49
  20   6   0   42.86    8.49
 -20  -6   0   41.82    8.37
  -6  20   0   46.81    9.27
  -5  20   0  -10.14    6.47
  -5  20   0   -0.51    6.17
 -20  -5   0   -6.68    5.33
   5 -20   0   13.81    6.36
 -20  -4   0  208.17   14.83
  -4  20   0  201.84   16.04
   4 -20   0  226.57   16.10
 -20  -4   0  226.14   18.06
  -4  20   0  236.74   19.30
  -3  20   0   39.15    9.55
  -3  20   0   21.71    7.33
 -20  -3   0   21.86    6.38
   3 -20   0   33.52    8.23
 -20  -2   0  178.80   15.93
 -20  -2   0  194.06   13.92
  -2  20   0  203.36   18.14
   2 -20   0  206.38   15.89
 -20  -2   0  232.41   22.20
  -2  20   0  175.25   14.61
 -20  -1   0    5.03    7.71
   1 -20   0    0.86    7.00
 -20  -1   0    0.04    5.03
  -1  20   0    1.64    6.18
  -1  20   0    3.48    6.39
 -20  -1   0    3.81    9.10
  20   0   0   92.55    9.03
   0  20   0   76.16   11.86
   0  20   0   70.77    9.74
 -20   0   0   66.37   13.82
 -20   0   0   48.60   10.74
   0 -20   0   69.48   10.84
   1  20   0   18.21    8.62
  -1 -20   0   14.14    8.46
 -20   1   0   10.41    8.14
 -20   1   0   14.84   10.72
   1  20   0   23.28    7.12
   2  20   0   11.63    6.74
   2  20   0    6.13    8.10
  -2 -20   0   22.61    8.78
 -20   2   0    4.16   10.05
 -20   2   0    9.33    7.22
  -3 -20   0    2.61    6.90
 -20   3   0   -0.36    9.81
 -20   3   0   -3.87    6.60
   3  20   0   -3.39    7.62
   3  20   0    2.76    6.10
  -4 -20   0  380.38   24.04
 -20   4   0  390.37   23.58
 -20   4   0  401.46   26.65
   4  20   0  382.74   21.66
 -20   4   0  410.16   24.30
   4  20   0  377.63   25.53
   5  20   0   -5.05    6.60
 -20   5   0   -8.70    9.56
 -20   5   0   21.05    7.58
  -5 -20   0   16.40    8.84
   5  20   0   -1.94    5.53
 -20   5   0   -3.80    6.81
  -6 -20   0  815.78   42.00
 -20   6   0  833.77   39.36
 -20   6   0  835.31   43.91
   6  20   0  862.94   42.93
   6  20   0  787.04   37.47
 -20   6   0  848.56   41.38
   7  20   0    2.55    6.03
  -7 -20   0   -2.85    7.19
 -20   7   0    1.78    7.34
 -20   7   0   -2.62    9.39
 -20   7   0    0.42    5.80
   7  20   0    6.86    7.67
 -20   8   0  169.28   15.19
   8  20   0  148.22   16.35
   8  20   0  174.31   13.33
  -8 -20   0  176.63   18.30
 -20   8   0  153.61   16.48
  -9 -20   0   -0.99    7.51
 -20   9   0   -6.44    5.56
   9  20   0    5.72    7.83
 -20   9   0    1.29    8.36
   9  20   0   16.82    6.69
 -20  10   0   18.98    9.37
  10  20   0    3.20    6.81
 -10 -20   0    7.90    7.97
 -20  10   0    6.09    6.22
  10  20   0   21.60   10.01
 -20  11   0   10.63    8.89
 -11 -20   0   15.47    9.67
  11  20   0    9.35    8.80
  12  20   0  109.24   15.31
 -12 -20   0   96.57   14.17
 -20  12   0   97.74   14.80
 -20  13   0    6.48    7.91
  13  20   0   -9.47    8.52
 -13 -20   0    1.96    8.23
  14  20   0  123.26   16.36
 -20  14   0  147.29   16.94
 -14 -20   0  159.59   18.16
  21  13   0   40.87   10.49
 -21 -13   0   40.88   10.94
 -13  21   0   49.33   11.65
  21  13   0   71.02   12.35
  21  12   0   13.72    8.59
 -12  21   0    8.16   14.93
  21  12   0   -2.01    6.96
 -12  21   0   -2.13    7.89
 -21 -12   0   10.10    7.42
 -21 -11   0  293.84   21.56
  21  11   0  333.06   22.78
 -11  21   0  330.86   22.62
 -11  21   0  270.76   23.83
  21  11   0  328.62   21.43
  21  10   0    7.62    7.53
 -10  21   0    7.64    7.71
 -10  21   0   -0.78    8.20
 -21 -10   0   -1.34    6.41
 -21  -9   0  143.63   15.11
  -9  21   0  150.47   17.67
  -9  21   0  137.95   14.79
  21   9   0  158.70   15.25
  -8  21   0   -1.69    8.11
  -8  21   0    9.26    7.68
 -21  -8   0   -2.93    6.03
  21   8   0    1.78    6.49
   7 -21   0    4.91    5.73
 -21  -7   0   -8.14    5.69
  -7  21   0   -3.13    8.11
  21   7   0    7.09    6.64
  -7  21   0   -6.03    5.58
  -6  21   0    7.66    7.51
 -21  -6   0    4.05    6.51
  21   6   0   10.46    6.93
  -6  21   0   12.33    8.69
   6 -21   0   17.09    6.88
 -21  -5   0   88.41   11.12
  -5  21   0  101.31   12.20
   5 -21   0  108.91   11.74
  -5  21   0   74.68   12.87
 -21  -4   0   12.20    6.59
  -4  21   0    1.61    7.52
  -4  21   0   22.76    7.90
   4 -21   0   30.92    7.92
 -21  -4   0   22.14    8.32
  -3  21   0  545.32   28.23
   3 -21   0  539.52   28.84
  -3  21   0  550.70   31.64
 -21  -3   0  544.71   30.33
 -21  -3   0  510.53   26.89
  -2  21   0   19.07    7.46
  -2  21   0   10.10    8.59
   2 -21   0   21.22    8.22
 -21  -2   0   46.00   12.80
 -21  -2   0   24.25    6.54
 -21  -2   0   26.26    8.58
 -21  -1   0  172.51   15.64
 -21  -1   0  193.31   20.26
   1 -21   0  163.85   15.87
  -1  21   0  164.09   14.10
  -1  21   0  170.36   17.39
   0 -21   0    3.44    7.69
   0  21   0   12.09    8.26
 -21   0   0    6.62    9.62
 -21   0   0   15.69    7.64
   0  21   0   -0.36    5.74
   1  21   0   12.95    8.24
   1  21   0   29.62    7.63
 -21   1   0    8.22    8.28
  -1 -21   0   25.99    8.29
 -21   1   0   16.66   11.11
   2  21   0   14.64    8.65
   2  21   0   -8.48    5.73
  -2 -21   0    4.20    7.59
 -21   2   0   -1.81    6.77
 -21   2   0   -7.59    9.21
 -21   3   0    2.60    9.19
 -21   3   0    8.16    7.89
   3  21   0   10.49    7.86
   3  21   0    4.49    6.07
  -3 -21   0   31.68    9.40
  -4 -21   0    9.65    8.70
 -21   4   0   -4.47    6.60
   4  21   0    6.90    6.57
   4  21   0    7.43    8.98
 -21   4   0   -1.17   10.34
   5  21   0  553.74   28.35
 -21   5   0  546.95   30.38
 -21   5   0  568.77   32.22
  -5 -21   0  610.53   33.33
   5  21   0  607.26   33.78
 -21   5   0  587.90   35.41
 -21   6   0   -2.68    8.45
   6  21   0   -0.58    6.07
 -21   6   0    3.63    6.64
  -6 -21   0    1.62    8.58
   6  21   0   14.62    8.65
 -21   6   0   -4.19   10.06
  -7 -21   0  334.35   23.77
   7  21   0  353.54   20.67
 -21   7   0  358.20   24.46
 -21   7   0  342.08   21.92
 -21   7   0  382.96   27.45
   7  21   0  336.51   25.25
  -8 -21   0  -10.24    7.11
 -21   8   0    2.46    9.97
   8  21   0  -10.55    6.43
   8  21   0   -6.88    7.87
 -21   8   0   -6.39    8.27
 -21   8   0   -6.25    5.66
 -21   9   0   15.67    8.57
   9  21   0    8.38    7.82
 -21   9   0    3.98    6.86
 -21   9   0    2.81   11.57
  -9 -21   0    1.49    8.78
 -10 -21   0   16.63    9.18
 -21  10   0   20.09    8.77
  10  21   0    4.31    8.57
 -11 -21   0   49.40   11.84
  11  21   0   51.50   11.72
 -21  11   0   66.20   12.29
 -21  12   0    0.26    8.59
 -12 -21   0    0.32    9.39
  12  21   0   -2.47    8.16
  13  21   0   75.79   14.77
 -21  13   0   62.51   12.63
 -13 -21   0   58.40   12.37
  22  11   0    2.89    7.31
  22  11   0    6.12    7.49
 -11  22   0   10.87    8.77
 -11  22   0   -7.02    9.40
 -22 -11   0    8.89    7.49
  22  10   0  179.75   17.24
  22  10   0  158.85   17.28
 -10  22   0  213.10   17.90
 -22 -10   0  213.35   17.51
 -10  22   0  165.39   19.50
 -22  -9   0  -10.58    5.80
  -9  22   0   11.10    7.74
  -9  22   0   -1.77    8.99
  22   9   0  -10.30    6.06
  -8  22   0  127.61   14.50
  22   8   0  134.43   14.42
  -8  22   0  102.67   15.46
 -22  -8   0  118.15   13.76
  -7  22   0   25.27    8.56
 -22  -7   0   15.06    7.82
   7 -22   0   12.86    6.96
  -7  22   0   22.82   10.11
  22   7   0   24.78    7.77
  22   6   0   13.78    7.36
 -22  -6   0   -1.40    5.81
  -6  22   0    1.61    8.60
  -6  22   0    2.96    6.85
   6 -22   0   10.71    7.09
  -5  22   0   -3.72    7.43
  -5  22   0   -1.90    6.63
   5 -22   0    1.21    6.19
 -22  -5   0   -7.70    5.46
 -22  -4   0   81.42   13.67
  -4  22   0  105.52   14.67
   4 -22   0  126.70   13.15
 -22  -4   0  138.93   12.95
  -4  22   0  104.55   12.59
 -22  -3   0   13.31    8.59
   3 -22   0   19.76    7.73
  -3  22   0    8.01    6.80
  -3  22   0   -0.69    8.18
 -22  -3   0    7.39    5.81
  -2  22   0  324.19   23.81
 -22  -2   0  313.60   21.63
  -2  22   0  313.82   19.77
   2 -22   0  299.53   20.82
  -1  22   0    1.24    6.10
   1 -22   0    8.95    7.55
 -22  -1   0    9.34    7.73
 -22  -1   0    3.49   10.42
  -1  22   0    0.08    7.81
 -22   0   0   35.48   11.71
   0  22   0   43.05    8.69
   0  22   0   47.16   11.41
 -22   0   0   47.95   10.93
   0 -22   0   34.99    9.71
 -22   1   0   25.83   11.55
   1  22   0    9.17    8.30
  -1 -22   0   14.07    8.55
 -22   1   0    1.53    6.90
   1  22   0   -0.04    6.35
  -2 -22   0    5.74    7.23
 -22   2   0    2.09    6.96
   2  22   0    1.03    6.41
 -22   2   0    6.07   10.61
   2  22   0   -5.87    7.67
   3  22   0   14.72    7.05
 -22   3   0   -3.54    7.15
 -22   3   0    4.68   10.37
   3  22   0   11.78    8.15
  -3 -22   0    8.30    7.88
   4  22   0  173.03   13.74
 -22   4   0  154.72   16.75
 -22   4   0  150.65   18.89
  -4 -22   0  151.79   16.84
   4  22   0  135.50   16.20
   5  22   0    6.19    6.30
 -22   5   0   23.55   11.77
 -22   5   0    1.91    7.19
   5  22   0    7.43    8.35
  -5 -22   0   -0.70    8.35
 -22   6   0  105.36   17.06
 -22   6   0  104.90   14.89
   6  22   0  121.68   13.69
 -22   6   0   87.38   12.03
   6  22   0   97.79   15.14
  -6 -22   0  109.17   15.36
 -22   7   0   -9.76    5.53
 -22   7   0   15.05   11.70
   7  22   0   20.91    9.75
 -22   7   0   -8.81    7.09
  -7 -22   0    1.77    8.91
   8  22   0   47.81   11.90
 -22   8   0   30.37   10.04
 -22   8   0   45.39   13.80
  -8 -22   0   53.56   11.48
 -22   9   0   20.19    9.14
  -9 -22   0   10.74    8.29
   9  22   0   -0.18    9.24
 -22   9   0   -6.33   10.91
 -10 -22   0   31.66   11.57
 -22  10   0   37.10   13.58
 -22  10   0   59.51   12.56
  10  22   0   37.70   10.74
  11  22   0    3.15    8.46
 -11 -22   0   -4.74    7.68
 -22  11   0    2.09    7.92
  -9  23   0   28.10    9.44
  23   9   0   35.51    9.21
  -9  23   0   19.03   10.79
 -23  -9   0   26.95    9.24
  23   8   0    7.50    7.31
  -8  23   0  -10.56    8.66
 -23  -8   0    0.36    6.39
  -8  23   0  -10.04    6.87
  23   7   0  124.29   14.07
  -7  23   0  103.56   13.61
  -7  23   0   91.88   15.02
 -23  -7   0  107.62   13.00
   6 -23   0    4.59    6.42
 -23  -6   0   -2.21    6.41
  -6  23   0  -10.21    6.12
  23   6   0    3.08    6.75
  -6  23   0    9.71    9.79
  23   5   0   48.38    9.79
   5 -23   0   37.36    8.67
 -23  -5   0   27.09    8.11
  -5  23   0   58.57   10.44
  -5  23   0   35.16   11.01
  -4  23   0   -1.24    8.34
  -4  23   0   -6.51    6.60
   4 -23   0   -3.42    6.25
   3 -23   0   67.90   10.98
  -3  23   0   58.48   12.91
 -23  -3   0   86.56   13.47
  -3  23   0   75.10   11.01
  -2  23   0   -0.91    7.55
   2 -23   0    0.71    7.00
 -23  -2   0    8.20    8.78
  -2  23   0   -0.28    7.06
  -1  23   0  149.99   14.50
 -23  -1   0  148.13   19.18
 -23  -1   0  157.22   17.38
  -1  23   0  183.79   19.08
   1 -23   0  143.51   15.67
   0  23   0   12.14    6.89
   0 -23   0    4.09    7.99
   0  23   0    1.09    8.23
 -23   0   0    9.95    7.75
 -23   0   0   12.26   11.56
   1  23   0  159.27   14.60
 -23   1   0  156.28   18.84
  -1 -23   0  140.89   16.19
   1  23   0  129.39   16.81
 -23   1   0  164.65   17.32
   2  23   0    6.62    6.98
 -23   2   0    2.69   10.74
 -23   2   0    5.30    8.58
  -2 -23   0   -1.18    7.86
   2  23   0   10.24    9.36
 -23   3   0   67.33   12.25
   3  23   0   93.80   14.37
 -23   3   0  120.05   18.06
   3  23   0  112.76   12.12
  -3 -23   0  132.57   15.97
  -4 -23   0   10.59    8.04
   4  23   0    7.85   10.21
 -23   4   0   26.27   11.82
   4  23   0    3.76    8.83
 -23   4   0    2.60    8.63
  -5 -23   0    0.14    8.78
   5  23   0    4.64    9.22
 -23   5   0   -9.66    6.60
 -23   5   0  -14.33    7.62
 -23   6   0   -4.25   10.57
  -6 -23   0   -6.46    8.53
   6  23   0    3.17    8.46
 -23   6   0  -14.18    6.66
  -7 -23   0   21.58   10.65
 -23   7   0    4.18   11.39
   7  23   0   10.39   10.13
 -23   7   0   10.84    8.33
  -8 -23   0    7.67    8.40
   8  23   0    3.58    8.25
 -23   8   0   14.66   10.13
 -23   8   0  -10.16   10.40
  -9 -23   0  183.37   19.54
   9  23   0  175.34   20.04
 -23   9   0  220.44   23.47
 -23   9   0  172.99   19.04
  -6  24   0  162.40   16.18
  24   6   0  155.49   16.06
  -6  24   0  157.32   19.06
   5 -24   0   20.86    7.46
  24   5   0    7.61    7.27
  -5  24   0   -8.73    8.46
  -5  24   0   -4.02    7.26
   4 -24   0   47.87    9.78
  -4  24   0   34.88   11.78
  -4  24   0   69.34   10.98
  -3  24   0   10.72    9.60
 -24  -3   0    9.11    9.01
   3 -24   0    4.51    7.11
  -3  24   0    1.87    6.38
  -2  24   0   27.18   10.66
   2 -24   0    8.80    8.38
 -24  -2   0   22.78    9.92
  -2  24   0   23.41    8.65
  -1  24   0   12.63    9.46
   1 -24   0    5.75    8.13
 -24  -1   0    3.21    8.02
  -1  24   0   10.15    7.08
   0  24   0   69.62   11.05
 -24   0   0  111.28   14.93
   0 -24   0   90.93   12.97
 -24   0   0   78.85   16.39
   0  24   0   82.16   13.76
   1  24   0    9.39    9.23
   1  24   0   25.72    7.82
 -24   1   0   24.09   10.66
 -24   1   0   -0.75    9.71
  -1 -24   0    4.26    8.01
  -2 -24   0  196.11   19.40
 -24   2   0  215.11   23.49
 -24   2   0  174.51   19.30
   2  24   0  167.49   19.79
 -24   3   0    3.67   10.05
   3  24   0    4.32    8.90
  -3 -24   0    9.87    8.66
 -24   3   0    8.00    8.39
 -24   4   0   97.60   15.25
   4  24   0  120.73   16.61
  -4 -24   0  116.57   15.88
 -24   4   0  109.44   17.45
  -5 -24   0    0.50    8.22
 -24   5   0    7.78   11.12
 -24   5   0   -1.99    7.51
   5  24   0   10.25    9.91
  -6 -24   0   14.61    8.82
 -24   6   0   22.89   12.52
   6  24   0   -6.15    9.26
 -24   6   0    4.26    9.31
   0   0  -1 6905.66  274.19
   0   0  -1 7570.29  274.47
  -1   0  -1 1001.09   35.78
   0  -1  -1  920.35   35.84
   0   1  -1  979.10   36.11
  -1   0  -1  832.65   35.60
   1   0  -1  981.24   36.24
   0  -1  -1  947.96   35.55
   1   0  -1  887.66   36.04
   0  -1  -1  927.84   36.12
   1   0  -1  958.74   35.91
   1   0   1  846.85   35.19
  -1   0   1  879.84   35.30
   1   0   1  861.39   34.75
  -1   0   1  925.62   35.22
   0  -1   1  930.30   35.31
   0   1   1  962.99   34.68
  -1   0   1  945.31   35.01
   0  -1   1  974.73   34.92
   0   1   1  891.53   35.24
  -1   1  -1 3785.13  133.12
   1   1  -1 3501.67  133.18
  -1  -1  -1 3678.33  133.12
   1  -1  -1 3415.51  133.41
   1   1  -1 3663.91  133.18
  -1  -1  -1 3029.71  132.92
  -1  -1   1 3679.31  133.36
  -1   1   1 3304.74  132.86
  -1   1   1 3827.23  133.13
  -1   1   1 3440.88  133.63
  -1   1   1 3368.92  132.90
   1   1   1 3106.90  133.15
   1  -1   1 3661.74  133.55
  -1  -1   1 3752.84  133.40
   1  -2  -1  323.47   14.47
   1  -2  -1  359.31   13.71
   2   1  -1  355.38   14.22
  -2  -1  -1  341.79   14.17
  -1   2  -1  377.05   13.61
   2   1  -1  344.02   14.44
   2   1  -1  322.18   14.56
  -2  -1  -1  344.55   13.67
  -1   2  -1  353.74   14.28
   2   1   1  365.45   14.04
  -1   2   1  349.97   14.66
  -2  -1   1  345.19   14.48
  -1   2   1  348.36   13.90
   2   1   1  324.91   13.88
  -2  -1   1  351.61   14.14
   1  -2   1  357.54   14.43
   2   0  -1  118.31    6.02
   0   2  -1  133.44    5.94
   2   0  -1  118.17    6.06
   0  -2  -1  124.40    5.05
  -2   0  -1  140.69    5.56
   0  -2  -1  122.95    5.49
   0  -2  -1  103.02    5.78
   0  -2   1  115.17    5.95
  -2   0   1  118.46    6.13
   0   2   1  134.88    6.11
   0   2   1  122.79    5.12
  -2   0   1  129.71    5.86
  -2   0   1  123.60    6.16
  -2   0   1  130.61    5.44
   2  -1  -1 1154.87   49.08
   1   2  -1 1295.49   50.09
  -2   1  -1 1310.50   49.81
  -2   1  -1 1313.13   49.07
  -1  -2  -1 1389.22   49.97
   2  -1  -1 1268.02   50.27
  -1  -2  -1 1342.75   49.87
  -2   1   1 1275.40   49.75
   1   2   1 1461.09   50.69
   2  -1   1 1290.37   50.67
  -1  -2   1 1317.84   50.70
  -2   1   1 1298.98   50.44
   2  -1   1 1290.70   49.75
  -2   1   1 1258.24   50.91
   2   2  -1   50.25    4.03
  -2  -2  -1   51.71    3.76
   2  -2  -1   51.85    2.42
  -2  -2  -1   48.17    3.48
   2  -2  -1   51.65    4.52
  -2   2  -1   50.76    2.93
  -2  -2  -1   48.17    2.75
  -2   2  -1   46.28    3.77
   2   2  -1   55.06    3.82
  -2   2   1   47.02    3.64
  -2  -2   1   47.78    3.90
   2   2   1   46.85    3.83
  -2   2   1   46.94    2.39
  -2   2   1   40.31    4.00
   2  -2   1   53.02    2.61
   2  -2   1   49.21    3.93
  -3  -2  -1  175.71    8.79
  -3  -2  -1  183.75    8.10
  -2   3  -1  190.16    8.99
   2  -3  -1  185.87    7.82
  -2   3  -1  194.26    8.18
   3   2  -1  189.86    8.75
  -2   3   1  185.45    8.61
  -3  -2   1  166.26    9.23
   2  -3   1  201.04    8.88
   3   2   1  200.82    8.78
  -3  -2   1  184.07    8.85
   2  -3   1  180.30    7.99
  -2   3   1  191.73    9.73
   1  -3  -1   24.08    2.29
  -3  -1  -1   20.28    2.68
  -3  -1  -1   24.13    2.83
  -1   3  -1   26.07    2.28
  -3  -1  -1   23.27    2.37
  -1   3  -1   24.09    2.96
  -3  -1   1   16.83    2.97
  -3  -1   1   16.38    2.72
   1  -3   1   23.85    2.08
  -1   3   1   18.90    2.97
   1  -3   1   27.92    3.15
   3   1   1   25.01    2.76
  -3  -1   1   20.78    3.44
  -1   3   1   23.24    2.34
  -3  -1   1   22.04    2.67
   0   3  -1   13.38    1.92
   0   3  -1   14.77    2.82
   3   0  -1   17.53    3.34
  -3   0  -1   14.82    2.24
  -3   0  -1   15.39    2.21
   0  -3  -1   14.63    2.14
   0   3   1   10.81    2.44
   0  -3   1   17.91    2.89
  -3   0   1   14.26    3.09
  -3   0   1   12.53    1.79
   0   3   1   13.64    1.65
  -3   0   1   13.58    2.54
  -3   0   1   18.79    3.06
   3  -1  -1  283.43   10.72
  -1  -3  -1  266.98   11.75
   3  -1  -1  277.25   13.17
   1   3  -1  273.48   12.12
  -3   1  -1  269.38   11.09
  -3   1  -1  270.45   11.88
  -1  -3   1  281.88   12.17
   3  -1   1  275.21   11.15
  -3   1   1  287.05   10.60
  -3   1   1  269.35   11.77
   1   3   1  267.09   12.03
   3  -1   1  284.20   11.77
  -3   1   1  256.37   12.35
   1   3   1  250.26   10.75
  -2  -3  -1   21.65    3.21
  -3   2  -1   16.68    2.07
   2   3  -1   17.57    2.96
  -3   2  -1   15.70    2.85
   2   3   1   26.33    2.25
   3  -2   1   30.19    3.12
   3  -2   1   22.21    2.23
  -3   2   1   18.94    2.89
   2   3   1   24.45    3.15
  -3   2   1   19.43    3.56
  -2  -3   1   20.83    3.34
  -3   3  -1  265.11   12.22
  -3  -3  -1  271.41   12.38
   3   3  -1  266.28   12.10
  -3   3  -1  268.61   11.55
   3  -3  -1  282.56   10.72
  -3   3   1  271.81   13.26
   3  -3   1  265.12   12.16
  -3  -3   1  284.94   12.62
   3   3   1  276.18   11.38
  -3   3   1  275.51   12.31
  -3   3   1  293.98   11.05
   3   3   1  282.82   12.48
   3  -3   1  265.06   11.48
  -3   4  -1 1976.45   76.02
  -4  -3  -1 2018.86   76.70
   4   3  -1 1931.19   76.45
  -3   4  -1 1974.16   76.67
  -4  -3  -1 1971.67   75.87
   3  -4  -1 2010.07   75.38
  -4  -3   1 2019.95   76.59
  -3   4   1 1939.08   77.06
   3  -4   1 1993.36   76.28
  -3   4   1 1956.83   76.27
   3  -4   1 1983.16   75.74
   4   2  -1   63.28    4.84
  -4  -2  -1   66.38    4.23
  -4  -2  -1   61.10    4.61
  -2   4  -1   68.86    4.21
  -2   4  -1   57.89    5.03
   2  -4  -1   59.87    3.76
   4   2   1   52.86    5.08
  -2   4   1   66.13    5.25
  -2   4   1   61.55    4.05
  -4  -2   1   47.25    4.64
   2  -4   1   59.05    3.78
   2  -4   1   57.79    4.37
  -4  -2   1   58.13    4.31
  -1   4  -1  648.18   25.29
   1  -4  -1  605.55   24.67
  -4  -1  -1  605.30   25.19
  -4  -1  -1  598.69   25.00
  -1   4  -1  638.06   24.73
  -4  -1  -1  632.25   24.81
  -1   4   1  615.86   24.10
  -4  -1   1  616.48   25.11
   1  -4   1  608.73   24.77
  -1   4   1  614.07   25.08
  -4  -1   1  617.41   24.22
   4   1   1  558.92   24.43
  -4  -1   1  623.35   24.83
   1  -4   1  617.83   24.11
  -4  -1   1  592.67   25.41
  -4   0  -1  555.97   22.98
   0   4  -1  569.42   23.36
  -4   0  -1  584.68   23.16
   0  -4  -1  595.92   23.15
   0   4  -1  556.10   22.92
  -4   0   1  556.66   23.38
   0   4   1  528.04   23.52
  -4   0   1  593.42   24.20
  -4   0   1  585.30   22.54
  -4   0   1  564.15   23.80
   4   0   1  571.02   22.92
   0  -4   1  602.86   23.71
   0   4   1  584.50   22.56
   1   4  -1 1047.58   41.90
  -4   1  -1 1071.46   41.07
  -1  -4  -1 1045.51   41.71
  -4   1  -1 1084.20   41.70
  -4   1   1 1040.68   41.12
   1   4   1 1029.89   41.22
   4  -1   1 1062.38   40.48
   1   4   1 1067.11   40.08
  -4   1   1 1108.75   39.81
   4  -1   1 1008.52   40.79
  -1  -4   1 1026.91   41.38
  -4   1   1  994.06   41.42
  -4   2  -1   11.51    2.10
  -2  -4  -1    7.30    2.67
  -4   2  -1   11.94    2.78
   2   4  -1   13.21    3.02
   2   4   1   11.27    1.88
  -2  -4   1    8.78    3.06
  -4   2   1   11.64    3.50
   2   4   1   10.25    2.88
   4  -2   1   12.41    2.21
   4  -2   1   14.05    2.52
  -4   2   1   11.20    2.71
   3   4  -1  828.67   34.67
  -4   3  -1  877.85   33.99
  -3  -4  -1  875.13   34.82
  -4   3  -1  878.99   34.77
   4  -3   1  862.09   34.46
   3   4   1  900.52   34.29
  -4   3   1  876.24   35.13
  -4   3   1  940.20   33.49
   3   4   1  794.59   35.16
   4  -3   1  910.97   35.01
  -4   3   1  850.17   35.86
  -3  -4   1  897.26   35.53
  -4   4  -1 1575.52   60.52
  -4   4  -1 1506.76   59.81
  -4  -4  -1 1555.81   60.52
   4   4  -1 1547.59   60.30
   4  -4  -1 1536.60   58.72
  -4   4   1 1610.68   60.99
   4  -4   1 1627.86   60.69
   4   4   1 1542.44   60.03
  -4  -4   1 1555.52   61.22
   4  -4   1 1543.82   60.18
   4   4   1 1508.38   61.00
  -4   4   1 1536.85   61.69
  -4   5  -1  735.29   30.30
   4  -5  -1  753.94   29.25
  -5  -4  -1  731.72   30.82
   5   4  -1  766.46   30.68
  -4   5  -1  763.84   30.97
  -4   5   1  720.88   31.39
  -4   5   1  771.81   30.66
   5   4   1  735.77   29.75
   4  -5   1  753.33   30.33
  -5  -4   1  767.93   30.98
  -5  -3  -1  747.51   30.95
   5   3  -1  742.98   30.76
   3  -5  -1  772.51   29.85
  -3   5  -1  775.37   30.54
  -5  -3  -1  766.72   30.35
  -3   5  -1  760.36   31.11
   3  -5   1  757.86   30.81
  -3   5   1  741.21   30.79
  -5  -3   1  783.62   31.08
  -3   5   1  778.37   31.82
  -2   5  -1   53.23    4.18
  -5  -2  -1   55.99    4.60
  -5  -2  -1   59.00    5.12
  -2   5  -1   55.58    4.83
  -5  -2  -1   49.29    3.97
   2  -5  -1   56.04    3.81
  -5  -2   1   57.13    4.62
  -5  -2   1   56.43    4.24
   2  -5   1   55.66    4.43
  -5  -2   1   57.30    5.66
  -2   5   1   59.53    4.30
  -2   5   1   54.87    5.03
  -5  -2   1   59.28    5.17
  -1   5  -1 1022.14   39.71
  -5  -1  -1  999.20   39.34
  -5  -1  -1  993.24   39.81
   1  -5  -1  982.15   39.18
  -5  -1  -1  966.39   39.41
  -1   5  -1 1029.89   39.37
  -5  -1   1 1002.05   41.04
   1  -5   1 1021.24   40.83
  -5  -1   1 1009.96   40.08
  -5  -1   1  978.84   41.38
  -1   5   1 1091.73   41.32
  -1   5   1 1024.76   40.06
  -5  -1   1 1055.21   40.89
   0  -5  -1  136.17    7.50
  -5   0  -1  134.28    7.16
   0   5  -1  148.65    7.86
   0   5  -1  151.51    7.53
  -5   0  -1  150.83    7.44
  -5   0   1  140.20    7.99
   0   5   1  140.33    6.62
   0  -5   1  139.89    7.94
  -5   0   1  141.25    7.54
  -5   0   1  128.61    8.18
  -5   0   1  138.11    6.42
   0   5   1  136.97    8.00
  -5   1  -1   43.04    3.60
  -5   1  -1   39.23    3.75
   1   5  -1   43.64    4.06
  -1  -5  -1   41.89    3.90
   1   5  -1   34.43    3.51
  -1  -5   1   39.15    4.23
  -5   1   1   36.68    4.20
   5  -1   1   40.37    3.34
   1   5   1   44.37    3.11
  -5   1   1   42.97    2.53
   1   5   1   29.50    3.63
  -5   1   1   42.07    3.99
   5  -1   1   42.40    3.90
  -5   2  -1  340.72   15.77
   5  -2  -1  365.06   14.06
   2   5  -1  379.01   16.14
  -2  -5  -1  351.14   15.90
   5  -2  -1  380.49   14.05
  -5   2  -1  346.80   15.10
   2   5   1  414.74   15.35
   5  -2   1  380.46   16.02
   2   5   1  345.05   16.48
  -5   2   1  353.46   16.23
  -2  -5   1  381.41   16.74
   5  -2   1  362.07   15.71
  -5   2   1  369.23   16.84
   3   5  -1  721.02   29.37
  -5   3  -1  714.88   28.46
  -5   3  -1  700.42   29.24
  -3  -5  -1  713.32   29.37
  -5   3   1  712.14   29.65
   5  -3   1  727.07   29.20
   5  -3   1  713.97   28.96
   3   5   1  726.14   29.86
   3   5   1  732.01   28.62
  -3  -5   1  719.84   29.99
  -5   3   1  730.16   30.33
  -5   4  -1  958.90   38.92
  -4  -5  -1  965.29   39.03
   5  -4  -1  987.96   36.74
   4   5  -1  909.39   38.66
  -5   4  -1  987.31   38.23
   5  -4   1 1020.24   37.73
  -4  -5   1  974.44   38.52
   4   5   1  967.57   37.15
  -5   4   1  991.14   38.21
   4   5   1  788.22   37.90
  -5   4   1  929.60   38.82
   5  -5  -1   91.85    4.59
   5   5  -1   96.86    6.50
  -5   5  -1   92.46    6.99
  -5   5  -1   86.71    6.74
  -5  -5  -1   84.82    6.65
  -5  -5   1   84.92    7.25
   5   5   1   89.79    5.65
   5  -5   1   89.75    6.18
  -5   5   1   85.91    6.58
  -5   5   1   79.31    7.51
   5   5   1  112.73    7.48
  -5   6  -1  459.74   20.68
   6   5  -1  470.26   20.46
  -5   6  -1  446.83   20.16
   5  -6  -1  458.26   18.45
  -6  -5  -1  435.32   20.50
  -6  -5   1  444.13   20.66
   6   5   1  458.95   19.31
  -5   6   1  454.40   20.52
   5  -6   1  454.97   19.77
  -5   6   1  466.89   21.83
  -4   6  -1   15.28    3.29
   4  -6  -1   15.07    2.54
   6   4  -1   10.93    3.41
  -6  -4  -1   14.36    4.02
  -4   6  -1   18.71    4.06
  -6  -4  -1   20.42    3.20
  -6  -4   1   16.04    3.74
  -4   6   1   14.14    4.43
  -4   6   1   14.34    3.51
   4  -6   1   16.51    3.58
  -3   6  -1  139.85    7.91
  -6  -3  -1  150.07    8.21
  -6  -3  -1  146.29    7.72
  -3   6  -1  149.07    8.44
   3  -6  -1  141.93    7.19
   6   3  -1  134.12    7.92
  -3   6   1  147.32    8.03
  -3   6   1  149.21    9.35
   3  -6   1  144.85    8.32
  -6  -3   1  147.99    8.13
  -6  -2  -1   51.44    4.36
  -6  -2  -1   54.07    5.33
  -6  -2  -1   59.19    4.88
  -2   6  -1   44.60    4.64
   2  -6  -1   46.10    4.21
  -2   6  -1   46.36    4.28
  -2   6   1   46.69    3.97
   2  -6   1   38.34    4.29
  -6  -2   1   42.15    4.45
  -2   6   1   43.45    5.02
  -6  -2   1   42.52    4.59
  -6  -2   1   43.08    4.04
  -6  -2   1   50.12    5.59
  -6  -1  -1 1599.62   62.87
  -1   6  -1 1562.48   62.18
  -6  -1  -1 1673.68   62.27
  -6  -1  -1 1595.82   62.23
   1  -6  -1 1565.36   62.07
  -1   6  -1 1591.96   62.52
  -1   6   1 1576.54   61.50
  -6  -1   1 1554.26   62.59
  -6  -1   1 1543.54   62.28
   1  -6   1 1626.64   62.38
  -1   6   1 1630.54   62.77
  -6  -1   1 1621.78   61.47
  -6  -1   1 1568.18   63.12
   0   6  -1 1175.78   47.17
   0  -6  -1 1214.12   47.28
  -6   0  -1 1198.97   47.31
   0   6  -1 1229.93   47.46
  -6   0  -1 1203.18   46.91
  -6   0  -1 1155.30   47.56
   0  -6   1 1186.35   48.38
   0   6   1 1244.07   48.66
  -6   0   1 1197.25   48.96
  -6   0   1 1171.18   48.18
   0   6   1 1239.90   47.30
  -6   0   1 1219.17   47.04
  -6   0   1 1242.89   48.61
  -6   1  -1  963.21   37.48
  -6   1  -1  951.55   38.06
   1   6  -1  921.45   37.97
   1   6  -1  943.09   38.00
  -1  -6  -1  959.31   38.16
  -6   1   1  943.90   37.56
  -1  -6   1  972.80   39.48
   1   6   1  964.81   39.45
  -6   1   1  975.57   39.62
  -6   1   1  978.32   39.22
   1   6   1 1017.35   38.10
   6  -1   1  963.76   38.43
  -6   2  -1   77.46    5.99
  -6   2  -1   86.12    5.51
  -2  -6  -1   96.78    6.33
   2   6  -1   96.95    6.55
   2   6  -1   98.05    6.51
  -6   2   1   88.31    4.05
   2   6   1   85.84    4.96
   6  -2   1   86.31    5.37
   2   6   1   79.81    6.21
  -6   2   1   91.62    6.74
  -2  -6   1   79.94    6.37
  -6   2   1   82.18    6.38
  -6   3  -1   44.81    4.84
   6  -3  -1   56.86    2.70
  -3  -6  -1   45.32    5.00
   6  -3  -1   51.89    2.57
  -6   3  -1   42.71    4.16
   3   6  -1   59.06    5.10
  -6   3   1   49.56    5.82
  -3  -6   1   44.08    5.43
   3   6   1   42.86    5.05
   6  -3   1   53.30    4.35
  -6   3   1   51.72    5.19
   3   6   1   58.61    4.38
   6  -4  -1  104.40    4.71
  -6   4  -1  116.90    8.09
  -4  -6  -1  112.34    7.77
  -6   4  -1   95.14    7.15
   6  -4  -1  117.30    4.88
   4   6  -1  109.07    7.93
   6  -4   1  124.08    7.11
  -4  -6   1  113.31    8.05
   4   6   1  129.64    8.50
   4   6   1  106.15    6.59
  -6   4   1  105.80    8.43
  -6   4   1  100.10    7.40
   6  -5  -1   57.39    3.60
  -6   5  -1   64.69    5.84
  -6   5  -1   67.19    6.87
  -5  -6  -1   56.50    6.16
   5   6  -1   61.85    6.37
  -6   5   1   68.68    6.77
   5   6   1   55.62    6.20
   6  -5   1   66.28    5.88
  -6   5   1   63.00    7.47
   5   6   1   46.87    4.71
  -5  -6   1   68.76    6.76
   6   6  -1  479.14   21.62
  -6   6  -1  465.20   21.32
   6  -6  -1  483.39   19.16
  -6   6  -1  475.86   21.89
  -6  -6  -1  473.64   21.86
   6  -6   1  483.17   21.02
  -6   6   1  463.04   23.29
   6   6   1  539.51   22.73
  -6   6   1  477.27   21.95
  -6  -6   1  491.43   22.46
   6   6   1  463.87   20.75
   7   6  -1  823.35   35.48
   6  -7  -1  864.23   33.56
  -7  -6  -1  856.12   36.18
  -6   7  -1  861.65   36.19
  -6   7  -1  849.67   35.70
  -6   7   1  916.34   38.54
   6  -7   1  908.61   36.16
  -6   7   1  877.30   37.00
  -7  -6   1  866.27   37.49
   7   6   1  843.54   35.85
   7   6   1  897.22   37.28
  -7  -5  -1  182.62   10.80
   5  -7  -1  167.00    8.52
  -5   7  -1  168.62   10.56
   7   5  -1  172.42   10.52
  -5   7  -1  153.09   10.66
   5  -7   1  151.98    9.61
  -7  -5   1  173.83   11.14
  -5   7   1  165.11   10.22
   7   5   1  164.50    9.19
  -5   7   1  171.29   12.33
  -4   7  -1  573.98   24.78
   7   4  -1  578.20   24.88
   4  -7  -1  571.05   23.57
  -7  -4  -1  558.30   24.29
  -7  -4  -1  599.71   25.16
  -4   7  -1  570.15   25.17
  -7  -4   1  600.45   25.62
   4  -7   1  585.67   25.35
  -4   7   1  590.30   25.61
  -4   7   1  602.04   26.66
   3  -7  -1    6.06    2.99
  -7  -3  -1    8.69    3.34
  -7  -3  -1    4.26    3.32
  -3   7  -1    4.58    3.25
  -3   7  -1    8.48    4.35
  -7  -3   1    4.41    3.64
  -7  -3   1   10.59    3.71
  -3   7   1    6.17    3.29
  -3   7   1    3.62    4.24
   3  -7   1    3.84    3.41
  -2   7  -1   48.57    5.18
  -7  -2  -1   46.24    4.79
  -7  -2  -1   58.16    5.28
  -2   7  -1   50.15    4.82
  -7  -2  -1   36.30    5.31
   2  -7  -1   39.82    4.52
  -7  -2   1   43.62    5.30
   2  -7   1   45.56    5.29
  -7  -2   1   44.25    4.33
  -7  -2   1   37.09    5.14
  -2   7   1   38.01    4.36
  -2   7   1   43.16    5.49
  -7  -2   1   42.33    6.09
  -7  -1  -1   87.95    6.51
  -7  -1  -1   90.64    7.61
  -1   7  -1   93.49    6.64
  -1   7  -1   86.88    6.36
   1  -7  -1   92.61    6.36
  -7  -1  -1   86.54    6.15
  -7  -1   1  104.19    8.27
  -1   7   1  100.32    7.79
   1  -7   1   96.69    7.38
  -7  -1   1   98.63    7.97
  -1   7   1   97.79    6.15
  -7  -1   1   73.67    6.50
  -7  -1   1   95.71    5.81
   0   7  -1  185.77   10.29
  -7   0  -1  200.41    9.69
  -7   0  -1  193.30   10.11
   0  -7  -1  209.78   10.45
  -7   0  -1  178.65   10.82
   0   7  -1  195.09   10.30
  -7   0   1  209.72   11.53
   0   7   1  212.55   11.38
   0   7   1  192.60    9.47
  -7   0   1  197.64   10.80
  -7   0   1  194.18   12.05
  -7   0   1  189.65    9.07
   0  -7   1  194.41   10.80
  -7   1  -1 1268.61   49.21
   1   7  -1 1206.27   49.70
   1   7  -1 1237.77   49.67
  -1  -7  -1 1217.29   49.77
  -7   1  -1 1257.77   48.99
  -7   1  -1 1302.03   49.86
  -7   1   1 1214.15   47.25
  -7   1   1 1292.15   49.26
   1   7   1 1203.49   49.32
  -1  -7   1 1220.73   49.33
   1   7   1 1212.20   47.77
  -7   1   1 1202.98   49.40
   2   7  -1 1737.11   66.43
  -7   2  -1 1660.39   66.53
  -7   2  -1 1698.08   65.71
  -2  -7  -1 1667.44   66.56
   2   7  -1 1674.88   66.44
  -7   2   1 1766.35   67.17
  -7   2   1 1683.87   64.82
   2   7   1 1678.43   67.30
   7  -2   1 1750.60   66.32
  -7   2   1 1714.33   67.34
   2   7   1 1605.36   65.58
  -2  -7   1 1701.94   67.38
   7  -3  -1   75.77    3.92
   3   7  -1   83.55    7.38
   3   7  -1   90.24    6.90
  -7   3  -1   57.30    6.26
  -7   3  -1   68.64    6.20
  -3  -7  -1   46.86    6.04
   7  -3   1   78.83    5.89
   3   7   1   78.24    7.24
  -7   3   1   79.25    7.32
  -7   3   1   65.35    7.33
   3   7   1   83.44    5.67
  -3  -7   1   64.11    6.87
   7  -4  -1  223.91    8.85
  -7   4  -1  226.13   12.75
  -7   4  -1  200.38   11.36
   4   7  -1  221.13   12.23
  -4  -7  -1  203.17   12.36
  -4  -7   1  177.71   12.28
  -7   4   1  201.58   13.47
   4   7   1  216.82   12.38
   4   7   1  239.14   10.88
   7  -4   1  224.23   11.15
  -7   4   1  213.65   12.19
  -7   5  -1   78.53    6.89
   5   7  -1   81.87    7.85
  -7   5  -1   87.98    8.22
  -5  -7  -1   69.71    7.59
   7  -5  -1   75.04    4.11
  -7   5   1   84.89    8.51
  -5  -7   1   64.77    7.72
   5   7   1   79.17    6.67
   5   7   1   61.78    7.21
  -7   5   1   76.00    7.80
   7  -5   1   85.34    6.64
   6   7  -1  236.65   12.97
  -7   6  -1  254.55   13.23
  -7   6  -1  243.36   13.66
  -6  -7  -1  229.84   14.01
   7  -6  -1  228.72   10.12
   6   7   1  240.14   11.98
   7  -6   1  248.60   12.20
  -6  -7   1  233.66   13.93
  -7   6   1  238.13   15.23
   6   7   1  229.03   13.55
  -7   6   1  245.44   13.50
   7   7  -1  152.19   10.15
  -7   7  -1  157.75   10.68
  -7  -7  -1  171.33   11.12
   7  -7  -1  158.17    7.74
  -7   7  -1  167.45   11.03
   7   7   1  162.36   11.48
  -7   7   1  158.62   10.51
   7   7   1  152.99    9.28
  -7   7   1  172.72   12.61
   7  -7   1  153.33    9.35
  -7  -7   1  149.60   10.88
  -7   8  -1  732.23   32.51
   8   7  -1  764.14   32.52
  -8  -7  -1  769.64   33.09
   7  -8  -1  745.92   30.00
  -7   8  -1  758.69   32.98
   8   7   1  754.61   30.79
   8   7   1  669.56   31.81
  -7   8   1  780.63   33.59
   7  -8   1  720.28   30.48
  -7   8   1  734.31   31.92
  -8  -7   1  748.70   32.32
   8   6  -1  242.31   12.85
  -8  -6  -1  240.10   13.85
   6  -8  -1  226.88   10.84
  -6   8  -1  230.56   13.42
  -6   8  -1  225.02   13.22
  -6   8   1  232.30   13.25
  -8  -6   1  202.34   12.73
   6  -8   1  240.15   12.19
   8   6   1  226.51   11.62
  -6   8   1  217.86   14.56
   5  -8  -1   76.74    6.13
  -8  -5  -1   79.31    8.09
   8   5  -1   88.07    7.60
  -5   8  -1   94.70    8.68
  -5   8  -1   73.53    7.29
  -5   8   1   70.05    7.38
  -5   8   1   72.21    7.88
   5  -8   1   88.52    7.54
  -8  -5   1   80.20    7.79
   8   4  -1    9.65    4.82
  -4   8  -1    9.20    4.35
  -8  -4  -1   14.11    4.41
  -8  -4  -1   13.41    4.48
  -4   8  -1   13.47    4.95
   4  -8  -1    8.62    3.65
  -8  -4   1   11.06    4.27
  -4   8   1    7.50    5.27
  -4   8   1   11.35    4.20
   4  -8   1   11.75    4.71
  -8  -3  -1  123.17    8.54
  -3   8  -1  119.79    8.87
  -3   8  -1  132.92    8.83
  -8  -3  -1  103.81    8.79
   3  -8  -1  111.60    7.61
   3  -8   1  117.93    9.11
  -8  -3   1  118.25    7.99
  -8  -3   1  109.56    8.75
  -3   8   1  118.95    8.13
  -3   8   1  116.95    9.58
  -8  -2  -1  155.74   11.53
  -8  -2  -1  159.60    9.95
  -8  -2  -1  167.92    9.60
   2  -8  -1  171.42    9.74
  -2   8  -1  168.56   10.30
  -2   8  -1  164.77   10.71
  -8  -2   1  159.52   10.30
  -8  -2   1  152.78   10.90
   2  -8   1  165.33   10.17
  -2   8   1  172.63   11.57
  -8  -2   1  156.52    9.18
  -8  -2   1  154.66   11.95
  -2   8   1  163.88    9.66
  -8  -1  -1  188.13   10.21
  -1   8  -1  208.32   11.20
   1  -8  -1  184.75   10.80
  -8  -1  -1  187.86   11.84
  -8  -1  -1  203.83   11.19
  -1   8  -1  192.98   11.06
  -1   8   1  185.11   12.12
  -8  -1   1  187.00   11.76
  -1   8   1  203.69   10.43
  -8  -1   1  199.16   10.00
  -8  -1   1  188.22   11.22
   1  -8   1  179.81   11.27
  -8  -1   1  209.28   13.82
   0   8  -1  628.94   26.89
  -8   0  -1  610.88   27.61
   0   8  -1  615.30   26.78
  -8   0  -1  637.68   26.07
   0  -8  -1  626.41   26.82
  -8   0  -1  626.58   26.78
  -8   0   1  636.79   28.28
   0   8   1  601.61   27.28
   0  -8   1  637.66   27.27
  -8   0   1  627.51   27.34
  -8   0   1  624.09   26.97
  -8   0   1  614.49   25.25
   0   8   1  613.63   25.79
   1   8  -1  298.29   14.95
   1   8  -1  311.50   14.95
  -8   1  -1  291.05   14.01
  -8   1  -1  299.37   15.05
  -8   1  -1  327.36   14.69
  -1  -8  -1  287.90   15.35
  -1  -8   1  299.41   15.81
  -8   1   1  310.51   16.42
   1   8   1  329.72   16.11
  -8   1   1  306.55   16.80
   1   8   1  315.94   14.17
  -8   1   1  314.03   15.52
  -8   1   1  286.63   13.22
  -2  -8  -1  463.10   21.00
  -8   2  -1  460.22   20.81
   2   8  -1  449.88   21.04
  -8   2  -1  427.61   20.01
   2   8  -1  476.52   20.62
   8  -2   1  452.85   20.02
   2   8   1  475.29   22.06
   2   8   1  463.25   19.69
  -8   2   1  476.40   22.23
  -2  -8   1  490.69   22.03
  -8   2   1  431.02   21.09
  -8   2   1  457.66   18.68
  -8   3  -1  652.43   28.45
   3   8  -1  675.21   28.73
   3   8  -1  668.19   28.34
  -3  -8  -1  616.70   28.40
   8  -3  -1  665.50   25.78
  -8   3  -1  632.84   27.41
   3   8   1  689.45   28.39
  -8   3   1  604.08   27.71
   3   8   1  608.77   26.11
  -8   3   1  623.16   28.55
  -3  -8   1  629.95   28.30
   8  -3   1  660.95   26.80
  -8   4  -1  383.62   17.77
  -4  -8  -1  384.00   18.97
   8  -4  -1  406.11   15.28
   4   8  -1  381.57   18.69
   4   8  -1  336.52   18.35
   8  -4   1  364.56   16.69
   4   8   1  347.26   18.24
  -8   4   1  396.32   19.52
  -8   4   1  385.79   18.66
   4   8   1  325.43   16.34
  -4  -8   1  402.16   18.92
  -5  -8  -1 1190.44   48.97
   5   8  -1 1148.13   48.27
   8  -5  -1 1172.55   45.26
  -8   5  -1 1232.59   49.03
  -8   5  -1 1186.50   47.73
   8  -5   1 1261.06   48.22
  -8   5   1 1204.27   50.28
  -5  -8   1 1174.27   49.81
  -8   5   1 1199.18   49.54
   5   8   1 1227.03   47.95
   5   8   1 1158.28   49.76
  -8   6  -1   16.92    5.27
  -6  -8  -1   25.15    5.85
  -8   6  -1   21.10    4.90
   8  -6  -1   19.09    2.28
   6   8  -1   22.24    5.04
   8  -6   1   25.44    4.23
   6   8   1   19.08    4.36
  -8   6   1   32.41    6.13
  -8   6   1   22.09    6.21
  -6  -8   1   17.94    5.72
   6   8   1   17.71    5.61
  -8   7  -1    0.76    4.45
  -8   7  -1   16.81    4.64
  -7  -8  -1    6.79    4.77
   8  -7  -1   11.14    2.20
   7   8  -1   15.75    4.59
   7   8   1   10.07    5.11
   8  -7   1   15.68    3.74
   7   8   1   13.30    4.01
  -7  -8   1    4.28    4.81
  -8   7   1   11.67    5.54
  -8   7   1    1.70    4.97
  -8   8  -1 1073.74   45.20
  -8   8  -1 1097.87   45.88
   8   8  -1 1118.25   45.38
   8  -8  -1 1072.99   42.41
  -8  -8  -1 1088.68   45.92
   8   8   1 1116.78   46.77
  -8   8   1 1116.53   46.41
  -8  -8   1 1143.37   46.89
   8  -8   1 1100.86   44.64
   8   8   1 1084.71   45.03
  -8   8   1 1101.62   47.46
  -8   9  -1   79.95    8.10
  -9  -8  -1  101.60    9.00
   8  -9  -1   90.53    5.63
  -8   9  -1   77.59    8.67
   9   8  -1   95.99    8.11
  -8   9   1   92.53    8.98
  -9  -8   1  101.32    9.58
   8  -9   1   86.30    7.20
  -8   9   1   93.82    9.76
   9   8   1   97.80    7.42
   9   8   1   86.19    9.02
  -9  -7  -1  820.58   35.88
  -7   9  -1  850.75   35.75
  -7   9  -1  805.10   35.79
   9   7  -1  867.51   35.62
   7  -9  -1  794.76   33.04
  -7   9   1  849.02   35.98
   9   7   1  854.31   34.72
  -9  -7   1  771.49   35.76
   7  -9   1  821.52   34.55
  -7   9   1  864.09   37.39
  -6   9  -1  414.76   20.96
  -9  -6  -1  442.43   21.10
   9   6  -1  455.92   20.81
   6  -9  -1  446.68   18.88
  -6   9  -1  432.06   20.94
   6  -9   1  424.05   19.77
  -6   9   1  430.64   20.47
   9   6   1  425.20   19.46
  -9  -6   1  434.37   20.66
  -6   9   1  444.05   22.06
   5  -9  -1  131.11    8.18
   9   5  -1  140.57    9.73
  -5   9  -1  140.64    9.84
  -9  -5  -1  154.50    9.63
  -5   9  -1  132.63   10.03
  -9  -5  -1  134.81   10.18
  -9  -5   1  125.24    9.71
   5  -9   1  143.92    9.27
  -5   9   1  120.61   10.35
  -5   9   1  142.21    9.93
  -9  -4  -1    6.54    4.21
  -9  -4  -1    8.37    4.24
  -4   9  -1    3.44    4.44
  -4   9  -1    5.70    4.06
   4  -9  -1    6.40    3.43
   4  -9   1    2.96    4.30
  -4   9   1    0.88    4.32
  -4   9   1   14.69    5.54
  -9  -4   1    8.35    4.55
  -9  -3  -1  210.04   12.07
  -3   9  -1  191.74   11.79
  -9  -3  -1  210.92   13.33
  -3   9  -1  213.07   12.15
   3  -9  -1  206.93   11.11
  -9  -3  -1  201.24   11.85
  -9  -3   1  219.75   12.32
  -3   9   1  199.18   12.78
  -9  -3   1  204.74   14.27
  -9  -3   1  200.03   11.45
  -3   9   1  195.50   11.51
   3  -9   1  201.87   11.76
  -2   9  -1  129.12    9.96
  -9  -2  -1  135.73    9.48
  -2   9  -1  142.89    9.69
   2  -9  -1  140.71    9.22
  -9  -2  -1  115.97   11.15
  -9  -2   1  144.58   11.66
   2  -9   1  124.94    9.56
  -9  -2   1  140.48    8.63
  -9  -2   1  128.48    9.79
  -2   9   1  143.85    9.18
  -9  -2   1  122.07   11.70
  -2   9   1  140.47   10.53
  -1   9  -1  100.93    8.70
   1  -9  -1  132.97    9.23
  -1   9  -1  109.98    9.19
  -9  -1  -1  130.80    8.59
  -9  -1  -1  134.59    8.96
  -9  -1  -1  114.16   10.18
  -9  -1   1  115.04   10.10
  -1   9   1  117.36    9.83
  -9  -1   1  126.78    7.72
   1  -9   1  128.85    9.60
  -1   9   1  113.93    8.66
  -9  -1   1  119.45   10.91
  -9  -1   1  114.18   10.81
  -9   0  -1 1291.10   54.07
  -9   0  -1 1373.74   53.31
   0   9  -1 1284.40   53.01
   0   9  -1 1385.87   53.50
  -9   0  -1 1315.81   52.29
   0  -9  -1 1251.00   53.04
   0  -9   1 1280.75   52.41
  -9   0   1 1217.93   52.07
   0   9   1 1332.96   51.01
   0   9   1 1245.46   52.74
  -9   0   1 1323.75   50.43
  -9   0   1 1286.29   53.48
  -9   0   1 1288.56   52.71
   1   9  -1  856.25   36.76
   1   9  -1  819.99   37.08
  -1  -9  -1  921.90   37.36
  -9   1  -1  888.55   37.22
  -9   1  -1  889.76   36.11
  -9   1  -1  950.72   36.83
  -9   1   1  880.04   38.89
  -1  -9   1  918.78   39.15
  -9   1   1  913.90   39.86
  -9   1   1  948.91   36.34
   1   9   1  926.87   37.07
  -9   1   1  892.17   38.46
   1   9   1  930.45   38.99
  -9   2  -1  253.67   12.93
  -9   2  -1  228.25   13.13
   2   9  -1  240.96   13.31
   2   9  -1  220.26   12.66
  -2  -9  -1  229.23   13.43
  -9   2   1  232.45   14.70
   9  -2   1  235.63   12.01
  -2  -9   1  225.38   14.07
  -9   2   1  229.49   13.48
  -9   2   1  236.23   10.62
   2   9   1  246.72   11.98
   2   9   1  256.79   14.63
  -9   3  -1    1.76    3.94
   3   9  -1    2.15    3.99
   3   9  -1    7.91    5.03
  -3  -9  -1    5.46    5.47
   9  -3  -1   13.95    2.33
  -9   3  -1   -1.01    4.51
   3   9   1    7.35    4.83
  -3  -9   1    1.80    5.24
   3   9   1   13.69    3.78
   9  -3   1    9.22    3.47
  -9   3   1    5.92    5.54
  -9   3   1   10.27    4.92
  -9   4  -1   43.15    5.61
   9  -4  -1   52.34    3.63
  -4  -9  -1   62.00    7.21
   4   9  -1   49.11    6.47
  -9   4  -1   33.17    6.35
   4   9  -1   48.85    6.79
   4   9   1   27.72    5.86
   9  -4   1   46.65    4.99
  -9   4   1   44.29    6.51
   4   9   1   42.04    4.91
  -9   4   1   49.75    7.30
  -4  -9   1   31.00    6.54
   5   9  -1   27.24    5.61
  -5  -9  -1   11.86    5.29
  -9   5  -1   12.89    4.26
  -9   5  -1   18.91    5.69
   9  -5  -1   18.04    2.04
   5   9  -1   16.99    5.30
  -5  -9   1    7.97    5.22
   5   9   1    7.76    5.20
   9  -5   1   15.86    3.63
   5   9   1   17.62    4.12
  -9   5   1   11.20    5.69
  -9   5   1   18.07    5.24
  -9   6  -1  393.95   18.25
   9  -6  -1  369.26   15.00
   6   9  -1  404.83   19.63
   6   9  -1  339.18   18.35
  -9   6  -1  395.95   19.14
  -6  -9  -1  370.37   19.22
   6   9   1  349.89   17.19
   6   9   1  382.87   19.68
   9  -6   1  389.29   17.16
  -9   6   1  368.32   19.91
  -9   6   1  398.30   19.01
  -6  -9   1  376.41   19.50
  -9   7  -1  163.81   10.81
  -9   7  -1  155.05   11.05
   9  -7  -1  161.14    7.22
   7   9  -1  165.06   11.25
  -7  -9  -1  151.34   11.25
   7   9   1  179.39   12.33
  -9   7   1  156.97   10.95
   9  -7   1  167.36    9.42
   7   9   1  149.72    9.84
  -7  -9   1  152.77   11.36
  -9   7   1  170.80   12.64
  -9   8  -1  451.76   22.42
   9  -8  -1  456.90   18.55
   8   9  -1  477.69   22.28
  -9   8  -1  445.77   21.70
  -8  -9  -1  460.84   22.82
   9  -8   1  508.50   21.39
   8   9   1  521.97   24.19
  -9   8   1  484.09   23.58
  -8  -9   1  454.47   23.46
  -9   8   1  455.18   24.18
   8   9   1  487.32   22.00
   9   9  -1  677.23   30.03
  -9   9  -1  663.65   30.06
   9  -9  -1  651.28   26.77
  -9   9  -1  696.50   30.92
  -9  -9  -1  673.95   30.84
  -9  -9   1  712.03   32.16
   9   9   1  695.96   30.19
   9  -9   1  711.87   29.64
  -9   9   1  704.81   31.75
   9   9   1  711.86   32.17
  -9   9   1  682.15   32.77
  -9  10  -1  136.48   10.97
 -10  -9  -1  116.61   10.45
  -9  10  -1  123.61   10.74
  10   9  -1  129.56   10.42
   9 -10  -1  122.59    6.97
  -9  10   1  145.37   10.85
  10   9   1  125.85   10.94
  10   9   1  146.66    9.63
 -10  -9   1  131.68   10.84
   9 -10   1  129.00    8.99
  -9  10   1  120.43   11.83
 -10  -8  -1  510.23   23.89
  -8  10  -1  472.06   23.51
  -8  10  -1  444.32   23.34
   8 -10  -1  473.20   20.34
  10   8  -1  524.12   23.40
 -10  -8   1  475.05   23.98
  10   8   1  533.38   24.83
  -8  10   1  493.55   23.89
  -8  10   1  496.81   25.59
   8 -10   1  508.55   22.47
  10   8   1  498.19   22.76
   7 -10  -1  192.32   10.12
 -10  -7  -1  208.80   12.82
  10   7  -1  203.90   12.52
  -7  10  -1  211.30   13.11
  -7  10  -1  204.68   12.82
 -10  -7   1  193.12   13.01
   7 -10   1  216.09   11.91
  -7  10   1  196.96   14.31
  10   7   1  220.04   11.74
  -7  10   1  212.27   12.70
  -6  10  -1  274.83   15.20
   6 -10  -1  284.07   13.21
  -6  10  -1  267.18   15.60
  10   6  -1  277.42   15.01
 -10  -6  -1  289.55   15.39
 -10  -6   1  278.24   15.21
  10   6   1  274.70   14.19
   6 -10   1  297.38   14.53
  -6  10   1  288.95   16.89
  -6  10   1  274.83   15.29
   5 -10  -1  143.33    8.47
  -5  10  -1  139.77   10.27
 -10  -5  -1  126.11   10.06
 -10  -5  -1  139.54    9.55
  10   5  -1  141.16    9.48
  -5  10  -1  142.23   10.16
  -5  10   1  130.66   11.17
 -10  -5   1  131.79    9.24
  -5  10   1  144.94    9.44
   5 -10   1  116.22    9.36
 -10  -4  -1   44.66    6.01
   4 -10  -1   43.43    5.20
  -4  10  -1   36.48    6.07
 -10  -4  -1   43.77    6.11
  -4  10  -1   39.97    5.81
   4 -10   1   38.75    5.85
 -10  -4   1   49.17    6.04
  -4  10   1   35.34    5.62
  -4  10   1   48.47    7.16
 -10  -3  -1  906.66   40.37
  -3  10  -1  943.59   39.11
 -10  -3  -1  926.34   38.65
 -10  -3  -1  913.14   38.77
   3 -10  -1  947.51   38.25
  -3  10  -1  928.01   39.04
  -3  10   1  939.61   39.03
 -10  -3   1  965.65   38.83
 -10  -3   1  949.34   40.02
 -10  -3   1  873.86   41.34
   3 -10   1  956.32   39.64
  -3  10   1  964.16   40.73
 -10  -2  -1  220.52   12.33
 -10  -2  -1  192.69   11.33
   2 -10  -1  207.87   11.77
 -10  -2  -1  182.34   13.68
  -2  10  -1  209.63   12.54
  -2  10  -1  222.19   12.52
 -10  -2   1  184.27   14.69
  -2  10   1  209.10   13.08
 -10  -2   1  204.78   12.49
  -2  10   1  210.44   11.70
   2 -10   1  205.81   12.82
 -10  -2   1  218.83   13.34
 -10  -2   1  209.85   11.14
  -1  10  -1   77.88    7.87
 -10  -1  -1   74.59    8.38
 -10  -1  -1   96.42    7.43
   1 -10  -1   94.56    8.12
  -1  10  -1   85.23    7.91
 -10  -1  -1   73.03    7.35
  -1  10   1   97.07    9.13
 -10  -1   1   77.27    8.16
 -10  -1   1   95.59    8.95
 -10  -1   1  105.59    7.12
  -1  10   1   85.13    7.40
 -10  -1   1  101.67   10.17
   1 -10   1  101.72    8.77
   0  10  -1   46.57    6.00
 -10   0  -1   47.82    5.31
 -10   0  -1   42.42    6.15
 -10   0  -1   51.29    8.05
   0  10  -1   44.29    6.04
   0 -10  -1   60.01    6.90
 -10   0   1   51.73    7.52
 -10   0   1   50.53    6.80
 -10   0   1   53.02    8.06
   0  10   1   47.36    6.55
   0 -10   1   50.26    7.13
   0  10   1   44.10    5.42
 -10   0   1   56.44    5.00
 -10   1  -1   53.17    8.54
   1  10  -1   62.12    7.23
 -10   1  -1   68.50    6.00
   1  10  -1   66.85    6.71
 -10   1  -1   48.56    6.72
  -1 -10  -1   59.14    6.98
 -10   1  -1   69.50    6.61
   1  10   1   78.28    6.40
 -10   1   1   72.62    9.45
   1  10   1   75.01    7.73
 -10   1   1   59.41    5.38
 -10   1   1   70.89    8.03
 -10   1   1   74.93    7.98
  -1 -10   1   69.94    8.03
   2  10  -1  227.17   12.97
 -10   2  -1  240.26   12.85
  -2 -10  -1  244.92   14.34
   2  10  -1  242.50   14.14
 -10   2  -1  255.39   14.35
  10  -2   1  242.34   12.24
 -10   2   1  225.03   14.07
 -10   2   1  244.38   10.97
  -2 -10   1  225.28   14.11
   2  10   1  227.85   14.54
 -10   2   1  263.56   14.95
   2  10   1  249.85   12.26
  10  -3  -1  359.68   14.88
 -10   3  -1  349.79   16.84
   3  10  -1  345.88   17.27
   3  10  -1  341.23   18.08
 -10   3  -1  323.67   17.77
  -3 -10  -1  360.16   18.07
 -10   3   1  337.39   18.09
  -3 -10   1  397.37   19.61
   3  10   1  354.66   19.11
 -10   3   1  345.39   18.58
  10  -3   1  386.63   17.01
   3  10   1  355.67   16.41
 -10   4  -1  269.69   13.49
  10  -4  -1  262.64   10.90
   4  10  -1  234.02   13.38
  -4 -10  -1  257.92   14.99
   4  10  -1  229.93   14.11
 -10   4  -1  232.44   14.08
 -10   4   1  248.65   14.71
  -4 -10   1  244.83   14.87
  10  -4   1  243.72   12.74
   4  10   1  272.45   15.00
 -10   4   1  251.39   15.18
   4  10   1  257.20   12.72
 -10   5  -1  513.06   23.27
   5  10  -1  498.08   23.85
 -10   5  -1  504.17   24.36
  10  -5  -1  555.25   20.49
  -5 -10  -1  511.06   24.66
   5  10  -1  501.42   24.36
   5  10   1  480.66   24.36
 -10   5   1  525.37   24.63
   5  10   1  513.43   22.50
 -10   5   1  524.12   25.02
  -5 -10   1  509.25   24.80
  10  -5   1  542.36   22.73
 -10   6  -1   71.46    7.00
 -10   6  -1   84.22    8.47
   6  10  -1   67.86    7.65
  10  -6  -1   78.86    3.95
  -6 -10  -1   66.41    8.03
   6  10  -1   57.96    7.37
  10  -6   1   84.34    6.44
   6  10   1   86.91    7.16
  -6 -10   1   70.82    8.48
   6  10   1   66.74    8.24
 -10   6   1   68.08    7.94
 -10   6   1  100.88    9.70
 -10   7  -1  248.29   13.61
  10  -7  -1  227.29    9.80
 -10   7  -1  231.66   14.22
   7  10  -1  249.37   13.93
   7  10  -1  231.11   14.32
  -7 -10  -1  245.07   14.65
  10  -7   1  228.08   11.75
 -10   7   1  227.27   14.19
 -10   7   1  242.01   15.24
   7  10   1  233.21   14.84
  -7 -10   1  233.03   14.41
   7  10   1  211.78   11.93
  10  -8  -1   63.85    3.77
   8  10  -1   65.03    7.68
 -10   8  -1   51.74    6.78
   8  10  -1   45.82    7.19
  -8 -10  -1   54.95    7.55
 -10   8  -1   44.57    7.16
   8  10   1   70.73    8.69
  -8 -10   1   66.01    8.21
 -10   8   1   51.56    7.92
  10  -8   1   59.04    5.82
   8  10   1   69.51    6.96
 -10   8   1   81.78    8.70
  10  -9  -1  138.75    7.00
 -10   9  -1  148.72   11.08
  -9 -10  -1  153.38   11.57
 -10   9  -1  124.77   11.13
   9  10  -1  161.03   11.60
  10  -9   1  156.76    9.24
  -9 -10   1  137.60   12.32
 -10   9   1  134.87   12.68
   9  10   1  150.18   10.47
   9  10   1  163.56   12.06
 -10   9   1  149.01   11.37
 -10  10  -1   27.81    6.93
 -10 -10  -1   40.04    7.28
  10 -10  -1   34.72    3.56
 -10  10  -1   34.31    6.41
  10  10  -1   44.85    7.34
  10  10   1   41.56    6.13
 -10 -10   1   24.48    7.31
 -10  10   1   30.06    7.65
 -10  10   1   41.99    7.42
  10  10   1   41.14    7.26
  10 -10   1   35.16    5.26
 -10  11  -1  174.81   14.02
 -10  11  -1  186.43   13.49
  10 -11  -1  164.53    8.93
 -11 -10  -1  191.36   13.59
  11  10  -1  192.09   13.22
 -11 -10   1  167.84   13.06
 -10  11   1  197.92   15.34
 -10  11   1  181.65   13.00
  11  10   1  177.63   14.25
  11  10   1  153.97   11.11
  10 -11   1  151.78   10.25
  11   9  -1  157.73   12.12
  -9  11  -1  176.42   12.83
   9 -11  -1  159.89    8.58
 -11  -9  -1  159.01   12.28
  -9  11  -1  137.50   12.54
  -9  11   1  155.72   14.34
  11   9   1  175.54   11.24
 -11  -9   1  149.62   12.10
  11   9   1  176.89   13.53
   9 -11   1  152.04   10.13
  -9  11   1  154.16   11.85
  11   8  -1  164.78   11.94
  -8  11  -1  194.02   12.70
 -11  -8  -1  165.14   12.66
  -8  11  -1  165.05   12.18
   8 -11  -1  169.39    9.27
 -11  -8   1  169.34   12.62
  -8  11   1  182.95   14.16
   8 -11   1  157.21   10.48
  11   8   1  182.82   10.98
  -8  11   1  162.26   12.26
  11   8   1  164.65   12.82
 -11  -7  -1    2.05    4.21
   7 -11  -1    6.11    3.11
  11   7  -1    1.81    4.34
  -7  11  -1   -5.38    4.12
  -7  11  -1   13.41    4.95
  -7  11   1    1.19    4.72
 -11  -7   1    1.19    4.73
  -7  11   1   -1.06    5.08
   7 -11   1    3.93    4.02
  11   7   1    1.52    3.53
  11   6  -1   28.65    5.32
  -6  11  -1   28.77    6.27
  -6  11  -1   45.63    6.47
   6 -11  -1   37.26    4.72
 -11  -6  -1   27.85    5.52
 -11  -6   1   28.18    5.52
   6 -11   1   26.88    5.06
  -6  11   1   27.42    6.28
  -6  11   1   31.14    5.68
  11   6   1   37.30    5.40
  -5  11  -1  104.81    9.34
  11   5  -1  101.32    8.72
   5 -11  -1   99.12    7.44
  -5  11  -1  109.51    9.82
 -11  -5  -1  108.23    9.04
 -11  -5  -1   99.72    8.50
  -5  11   1  101.44    9.97
  -5  11   1  101.50    8.77
 -11  -5   1   94.84    8.38
   5 -11   1   96.12    8.31
 -11  -4  -1  229.64   13.09
   4 -11  -1  228.82   12.18
  -4  11  -1  225.21   13.30
 -11  -4  -1  207.98   12.44
  -4  11  -1  219.11   13.09
   4 -11   1  210.16   12.32
 -11  -4   1  189.83   12.85
  -4  11   1  191.19   13.55
 -11  -4   1  207.78   11.82
  -4  11   1  200.84   12.06
 -11  -3  -1  947.61   40.77
 -11  -3  -1  924.30   38.60
 -11  -3  -1  894.77   38.69
  -3  11  -1  946.12   39.29
  -3  11  -1  913.29   38.98
   3 -11  -1  895.67   38.15
 -11  -3   1  908.50   41.68
  -3  11   1  891.56   40.13
   3 -11   1  958.94   39.47
 -11  -3   1  922.35   39.60
  -3  11   1  934.16   38.71
 -11  -3   1  941.70   38.50
 -11  -2  -1  176.34   11.17
 -11  -2  -1  152.44   11.89
   2 -11  -1  170.84   10.64
 -11  -2  -1  166.97   10.32
  -2  11  -1  144.75   10.81
  -2  11  -1  171.32   11.21
  -2  11   1  160.66   12.21
 -11  -2   1  152.13    9.45
 -11  -2   1  166.36   13.67
 -11  -2   1  164.46   11.05
   2 -11   1  172.25   10.98
  -2  11   1  162.78   10.19
 -11  -1  -1   82.05    8.18
   1 -11  -1   83.53    7.94
  -1  11  -1   91.51    7.90
  -1  11  -1   71.46    7.38
 -11  -1  -1   95.98    7.47
 -11  -1  -1   94.91    9.89
  -1  11   1   85.92    8.85
 -11  -1   1   74.11    8.46
 -11  -1   1   88.15    9.55
 -11  -1   1   78.41    6.24
   1 -11   1   84.79    8.74
  -1  11   1   87.15    7.27
 -11  -1   1   74.89    8.10
   0  11  -1  675.43   29.88
 -11   0  -1  669.25   29.63
 -11   0  -1  687.01   31.10
   0  11  -1  630.85   29.27
 -11   0  -1  670.93   28.54
   0 -11  -1  692.53   29.78
 -11   0   1  614.63   29.35
 -11   0   1  660.45   29.59
 -11   0   1  693.23   27.38
 -11   0   1  643.26   30.74
   0  11   1  631.22   27.82
   0 -11   1  661.75   29.52
   0  11   1  666.24   29.91
 -11   1  -1   67.94    6.79
 -11   1  -1   54.41    6.88
   1  11  -1   56.06    6.71
  -1 -11  -1   58.38    7.28
 -11   1  -1   58.81    5.92
 -11   1  -1   63.86    8.65
   1  11  -1   58.22    6.73
   1  11   1   57.85    5.94
 -11   1   1   59.22    7.53
  -1 -11   1   67.24    8.15
 -11   1   1   67.29    7.62
   1  11   1   68.49    8.06
 -11   1   1   67.40    9.30
 -11   1   1   60.82    5.28
 -11   2  -1   52.29    6.01
   2  11  -1   50.84    6.92
   2  11  -1   38.91    6.10
  -2 -11  -1   46.26    7.07
 -11   2  -1   56.22    7.32
  11  -2   1   55.30    5.45
 -11   2   1   52.46    4.57
 -11   2   1   48.26    6.71
 -11   2   1   54.49    9.18
 -11   2   1   50.44    7.15
   2  11   1   39.89    6.49
   2  11   1   54.16    5.50
  -2 -11   1   43.18    6.93
   3  11  -1  340.01   17.51
   3  11  -1  306.36   16.44
  11  -3  -1  349.53   14.54
 -11   3  -1  321.19   17.32
  -3 -11  -1  323.27   17.53
 -11   3  -1  341.70   16.65
   3  11   1  333.61   17.74
   3  11   1  316.45   15.21
 -11   3   1  318.26   17.67
  11  -3   1  337.91   15.71
 -11   3   1  309.02   17.01
  -3 -11   1  319.77   17.65
  11  -4  -1  220.26    9.62
  -4 -11  -1  215.66   13.34
 -11   4  -1  191.43   11.91
   4  11  -1  207.92   12.57
   4  11  -1  211.31   13.74
 -11   4  -1  200.73   12.84
  11  -4   1  202.46   11.28
   4  11   1  214.44   13.54
 -11   4   1  207.44   13.02
   4  11   1  213.45   11.33
  -4 -11   1  200.89   13.92
 -11   4   1  204.60   13.23
 -11   5  -1  542.16   24.39
  11  -5  -1  532.22   21.47
  -5 -11  -1  574.28   26.45
   5  11  -1  516.51   25.62
 -11   5  -1  536.20   25.53
   5  11  -1  551.29   25.01
   5  11   1  503.75   25.57
  11  -5   1  557.20   23.57
   5  11   1  507.45   23.25
 -11   5   1  540.40   25.73
  -5 -11   1  560.32   26.19
 -11   5   1  551.34   25.93
  11  -6  -1  178.32    7.81
 -11   6  -1  199.06   12.79
   6  11  -1  199.60   12.45
  -6 -11  -1  189.82   12.92
 -11   6  -1  170.41   11.51
   6  11  -1  183.63   12.62
 -11   6   1  176.94   13.03
  -6 -11   1  185.42   13.24
 -11   6   1  186.96   13.53
   6  11   1  187.73   13.13
  11  -6   1  200.36   10.87
   6  11   1  205.96   11.27
 -11   7  -1   86.93    7.94
 -11   7  -1   80.71    9.07
  -7 -11  -1   82.27    9.36
   7  11  -1   59.57    8.12
   7  11  -1   74.19    8.00
 -11   7   1   87.73    9.73
   7  11   1   76.99    8.74
   7  11   1   77.31    7.28
  11  -7   1   76.63    6.69
 -11   7   1   81.64    8.84
  -7 -11   1  101.38    9.99
  -8 -11  -1  140.34   11.59
 -11   8  -1  147.77   10.87
   8  11  -1  147.99   11.75
 -11   8  -1  139.41   11.31
  11  -8  -1  132.56    6.27
   8  11  -1  151.53   11.11
   8  11   1  136.88    9.74
 -11   8   1  135.65   12.51
  11  -8   1  131.68    8.68
 -11   8   1  154.58   11.49
   8  11   1  138.49   11.78
  -8 -11   1  153.94   12.01
 -11   9  -1    7.31    5.04
 -11   9  -1   11.87    5.93
   9  11  -1    5.95    5.21
  11  -9  -1    7.99    1.93
   9  11  -1   10.05    5.60
  -9 -11  -1    0.11    5.19
   9  11   1    3.54    5.25
  11  -9   1    6.76    3.91
 -11   9   1   -0.21    5.74
  -9 -11   1    4.35    5.62
 -11   9   1    3.28    5.16
   9  11   1    9.51    4.63
  10  11  -1   70.43    9.39
 -11  10  -1   72.91    9.41
 -10 -11  -1   80.54    9.57
  10  11  -1   95.16    9.80
  11 -10  -1   67.01    4.56
 -11  10  -1   68.95    8.55
 -11  10   1   68.79    8.91
 -11  10   1   60.71    9.55
 -10 -11   1   74.29    9.55
  10  11   1   71.63    9.23
  10  11   1   72.51    7.90
  11 -10   1   73.57    6.85
  11 -11  -1   64.83    4.85
 -11 -11  -1   66.97    9.91
  11  11  -1   62.57    9.07
 -11  11  -1   51.68    8.75
 -11  11  -1   58.69    8.29
 -11  11   1   54.80    9.57
 -11  11   1   39.84    7.97
  11 -11   1   59.46    6.37
  11  11   1   69.90    9.64
  11  11   1   62.99    7.78
 -11 -11   1   66.99    9.46
 -11  12  -1  236.74   16.16
 -11  12  -1  225.57   15.87
 -12 -11  -1  215.62   15.88
  12  11  -1  266.72   16.22
  11 -12  -1  220.79   10.99
 -12 -11   1  218.32   16.10
 -11  12   1  242.97   18.17
  11 -12   1  249.67   13.61
 -11  12   1  252.43   16.45
  12  11   1  256.69   17.76
  12  11   1  246.57   14.97
 -12 -10  -1  180.48   13.84
  12  10  -1  190.16   13.54
  10 -12  -1  184.40    9.67
 -10  12  -1  174.97   13.98
 -10  12  -1  184.85   13.92
  12  10   1  185.24   15.08
  12  10   1  184.46   12.36
  10 -12   1  190.68   11.47
 -12 -10   1  176.15   13.81
 -10  12   1  181.38   13.58
 -10  12   1  179.70   15.59
  -9  12  -1   82.94    9.70
  -9  12  -1   86.19   10.09
 -12  -9  -1   70.49    9.27
  12   9  -1   83.98    9.21
   9 -12  -1   90.47    6.49
 -12  -9   1  103.02   10.38
  12   9   1   97.55   10.56
  12   9   1  102.38    9.17
  -9  12   1   72.15    9.21
  -9  12   1   78.66   10.48
   9 -12   1   86.53    8.07
  -8  12  -1   85.60    9.72
  -8  12  -1   74.92    9.36
   8 -12  -1  103.47    7.14
  12   8  -1   90.72    9.06
 -12  -8  -1   96.75   10.18
  12   8   1   88.58    8.70
  -8  12   1  116.45   12.14
   8 -12   1  112.58    9.05
 -12  -8   1  110.22   10.72
  -8  12   1  101.80   10.31
  12   7  -1    6.48    5.04
 -12  -7  -1    1.66    4.68
   7 -12  -1    3.88    3.27
  -7  12  -1   -2.24    4.63
  -7  12  -1   -0.15    4.60
  -7  12   1   -3.98    5.46
  -7  12   1   12.97    5.02
 -12  -7   1    3.32    4.32
  12   7   1    3.89    4.20
   7 -12   1   -2.19    4.30
 -12  -6  -1  118.06   10.11
  -6  12  -1  154.00   11.13
  -6  12  -1  152.44   11.66
   6 -12  -1  139.33    8.95
  12   6  -1  138.51   10.52
 -12  -6   1  141.05   10.70
   6 -12   1  142.40   10.49
  -6  12   1  147.08   11.05
  -6  12   1  148.22   12.73
   5 -12  -1  128.39    8.73
 -12  -5  -1  118.13    9.53
  -5  12  -1  104.51    9.86
  -5  12  -1  124.64   10.62
 -12  -5  -1  129.14    9.90
  12   5  -1  107.71    9.40
 -12  -5   1  108.34    9.09
  -5  12   1  127.53   11.54
  -5  12   1  105.05    8.88
   5 -12   1  113.31    9.19
 -12  -4  -1  926.13   39.03
  -4  12  -1  887.82   39.32
  -4  12  -1  917.26   39.42
   4 -12  -1  920.28   38.13
 -12  -4  -1  907.70   38.94
  -4  12   1  915.59   39.03
  -4  12   1  919.48   40.78
   4 -12   1  951.84   39.42
 -12  -4   1  876.58   39.86
 -12  -4   1  929.49   38.82
 -12  -3  -1  459.79   23.55
 -12  -3  -1  429.80   21.41
   3 -12  -1  463.78   21.30
  -3  12  -1  467.44   22.36
 -12  -3  -1  483.37   22.20
  -3  12  -1  429.90   21.75
   3 -12   1  426.88   21.06
  -3  12   1  426.61   20.54
  -3  12   1  428.64   22.49
 -12  -3   1  460.40   22.03
 -12  -3   1  440.48   20.34
 -12  -3   1  428.52   23.51
 -12  -2  -1  681.82   30.09
  -2  12  -1  626.28   30.20
 -12  -2  -1  663.33   31.76
  -2  12  -1  688.33   30.06
   2 -12  -1  687.00   29.78
 -12  -2  -1  709.20   29.65
  -2  12   1  685.02   28.93
 -12  -2   1  647.11   29.93
  -2  12   1  675.89   30.99
 -12  -2   1  652.57   28.45
   2 -12   1  665.00   29.82
 -12  -2   1  641.30   31.61
 -12  -1  -1  368.25   21.19
 -12  -1  -1  415.24   19.07
 -12  -1  -1  400.74   19.80
  -1  12  -1  388.92   20.11
   1 -12  -1  407.00   19.59
  -1  12  -1  422.77   19.95
  -1  12   1  411.39   21.52
 -12  -1   1  419.33   18.78
 -12  -1   1  418.88   20.90
  -1  12   1  412.39   19.26
   1 -12   1  396.16   20.40
 -12  -1   1  405.26   20.58
 -12  -1   1  411.13   22.23
 -12   0  -1    5.09    3.49
 -12   0  -1   13.25    5.23
   0  12  -1   10.97    4.47
   0  12  -1    7.70    4.09
   0 -12  -1   15.47    5.09
 -12   0  -1   16.68    5.58
 -12   0   1   17.06    6.14
   0  12   1    6.85    3.95
 -12   0   1   10.89    3.32
 -12   0   1   10.17    5.15
 -12   0   1    3.93    4.41
   0 -12   1    2.39    4.49
   0  12   1   11.16    5.10
   1  12  -1  127.72    9.28
   1  12  -1  138.59   10.28
 -12   1  -1  141.06    8.64
 -12   1  -1  113.37   11.21
 -12   1  -1  115.68    9.65
  -1 -12  -1  130.35   10.49
 -12   1   1  138.10   10.76
   1  12   1  134.16   11.51
   1  12   1  133.84    9.01
 -12   1   1  127.88   11.09
 -12   1   1  125.33    7.72
 -12   1   1  142.19   12.98
  -1 -12   1  126.36   10.48
   2  12  -1    6.80    3.92
  -2 -12  -1    9.49    4.86
 -12   2  -1    3.02    5.62
 -12   2  -1   -1.33    4.36
 -12   2  -1    1.87    3.82
   2  12  -1    4.44    4.69
  12  -2   1   12.24    3.39
 -12   2   1    3.57    5.07
 -12   2   1   14.63    6.34
   2  12   1   11.48    3.73
  -2 -12   1    5.10    5.28
   2  12   1   11.12    4.86
 -12   2   1    4.56    4.71
 -12   2   1    3.77    2.68
  12  -3  -1  145.73    7.98
   3  12  -1  139.56   10.89
   3  12  -1  151.64   10.29
 -12   3  -1  163.09   11.76
  -3 -12  -1  151.01   11.27
 -12   3  -1  169.60   10.44
   3  12   1  156.37    9.49
  12  -3   1  154.35    9.42
  -3 -12   1  159.25   11.69
 -12   3   1  146.51   11.00
   3  12   1  152.19   11.59
 -12   3   1  126.74   11.47
 -12   4  -1  508.06   24.62
   4  12  -1  526.55   23.84
  -4 -12  -1  503.39   24.65
 -12   4  -1  524.23   23.43
   4  12  -1  490.54   24.54
  12  -4  -1  490.36   20.89
 -12   4   1  508.62   25.64
  12  -4   1  551.30   23.84
  -4 -12   1  524.80   26.33
 -12   4   1  562.63   26.25
   4  12   1  515.46   23.38
   4  12   1  538.73   26.21
 -12   5  -1   39.52    7.08
  12  -5  -1   57.34    3.97
   5  12  -1   62.48    7.17
 -12   5  -1   47.56    6.29
  -5 -12  -1   63.56    8.26
   5  12  -1   45.75    7.79
 -12   5   1   46.00    7.78
   5  12   1   57.93    6.22
   5  12   1   53.89    7.76
  12  -5   1   75.19    6.46
  -5 -12   1   45.88    7.89
 -12   5   1   35.70    6.85
   6  12  -1  711.83   34.76
 -12   6  -1  769.12   34.83
  12  -6  -1  767.56   29.86
 -12   6  -1  804.58   33.68
  -6 -12  -1  804.50   35.66
   6  12  -1  763.56   34.00
   6  12   1  801.85   33.97
  12  -6   1  795.04   33.64
 -12   6   1  813.36   36.52
  -6 -12   1  822.49   36.89
 -12   6   1  809.45   36.39
   6  12   1  799.83   36.57
 -12   7  -1  233.74   15.73
   7  12  -1  282.07   16.49
  -7 -12  -1  261.71   16.55
   7  12  -1  271.91   15.77
 -12   7  -1  265.47   15.09
 -12   7   1  250.37   15.73
  -7 -12   1  257.11   16.27
   7  12   1  237.27   13.78
  12  -7   1  262.06   13.11
 -12   7   1  258.96   16.56
   7  12   1  273.01   17.13
  -8 -12  -1   31.71    7.34
 -12   8  -1   24.06    5.88
 -12   8  -1   27.11    6.92
   8  12  -1   24.79    7.01
   8  12  -1   18.90    5.94
 -12   8   1   41.13    7.47
 -12   8   1   28.84    7.27
   8  12   1   24.50    5.52
  -8 -12   1   27.25    7.17
   8  12   1   20.11    6.37
  12  -8   1   32.26    4.80
 -12   9  -1  179.65   12.62
   9  12  -1  163.07   14.19
   9  12  -1  163.23   12.62
  -9 -12  -1  192.53   14.51
 -12   9  -1  166.81   13.26
  -9 -12   1  159.11   13.34
  12  -9   1  160.90    9.91
 -12   9   1  169.13   14.43
 -12   9   1  144.87   13.30
   9  12   1  168.89   11.22
   9  12   1  169.22   14.25
 -10 -12  -1   45.33    8.60
 -12  10  -1   63.25    9.67
 -12  10  -1   60.41    8.12
  10  12  -1   36.93    7.76
  10  12  -1   71.19    8.99
  12 -10   1   63.44    6.43
  10  12   1   63.63    7.67
 -12  10   1   53.54    9.32
  10  12   1   61.60    9.66
 -12  10   1   69.59    9.54
 -10 -12   1   36.44    8.27
 -12  11  -1  179.84   14.39
 -12  11  -1  186.62   14.25
  11  12  -1  206.75   14.81
  11  12  -1  202.13   15.15
 -11 -12  -1  175.34   15.28
 -12  11   1  187.30   15.97
  11  12   1  194.72   15.37
 -12  11   1  167.66   13.96
  11  12   1  194.24   13.45
  12 -11   1  211.64   11.59
 -11 -12   1  198.55   15.07
  12  12  -1   78.81   10.45
  12  12  -1   92.87   11.33
 -12  12  -1   95.73   11.30
 -12  12  -1  103.72   10.84
 -12 -12  -1   76.82   10.51
 -12  12   1   98.36   12.05
  12  12   1   54.50    9.62
 -12  12   1   85.76   11.08
  12 -12   1   79.56    7.43
 -12 -12   1   66.20   10.25
  12  12   1   86.23    9.51
 -13 -12  -1   73.66   10.92
 -12  13  -1   58.62    9.13
 -12  13  -1   56.90    9.39
  13  12  -1   57.41    9.38
  13  12  -1   67.10   10.50
  12 -13   1   67.07    7.08
  13  12   1   56.75    9.52
 -13 -12   1   52.52    9.47
 -12  13   1   54.90    9.28
  13  12   1   51.28    8.26
 -12  13   1   57.11   10.40
 -11  13  -1  310.00   19.65
  13  11  -1  332.84   19.67
 -13 -11  -1  343.64   20.37
 -11  13  -1  336.01   20.05
 -13 -11   1  321.87   19.73
 -11  13   1  323.03   21.80
  13  11   1  334.70   20.24
  13  11   1  288.86   17.78
  11 -13   1  331.72   16.79
 -11  13   1  327.63   19.56
  10 -13  -1   42.58    4.87
  13  10  -1   47.79    8.17
 -13 -10  -1   34.35    8.42
 -10  13  -1   40.81    7.90
 -10  13  -1   35.79    8.00
 -10  13   1   35.89    9.00
 -10  13   1   41.07    8.68
  13  10   1   31.08    6.49
  10 -13   1   38.45    6.18
 -13 -10   1   36.48    7.82
  13  10   1   24.72    7.18
  -9  13  -1   17.82    6.82
  -9  13  -1   12.23    7.19
   9 -13  -1   10.00    3.65
 -13  -9  -1   26.24    6.84
  13   9  -1   15.56    6.05
  -9  13   1   12.99    6.82
   9 -13   1   21.58    5.48
  13   9   1   20.02    6.73
  13   9   1   24.65    6.04
 -13  -9   1   23.39    6.48
  -9  13   1   12.70    7.55
 -13  -8  -1  159.07   13.60
  -8  13  -1  198.85   14.61
  -8  13  -1  190.44   14.07
   8 -13  -1  186.54   10.71
  13   8  -1  185.76   12.74
  -8  13   1  178.67   13.09
  -8  13   1  212.71   16.14
 -13  -8   1  168.81   12.83
   8 -13   1  191.82   12.27
  13   8   1  184.90   12.65
  -7  13  -1  694.29   32.89
  -7  13  -1  736.91   33.43
   7 -13  -1  735.96   30.47
  13   7  -1  716.83   32.49
 -13  -7  -1  664.83   32.36
  13   7   1  700.04   32.07
  -7  13   1  756.18   35.32
  -7  13   1  720.26   33.27
   7 -13   1  732.62   32.26
 -13  -7   1  739.20   33.31
  -6  13  -1   68.72    8.60
  -6  13  -1   58.93    8.21
  13   6  -1   77.10    8.58
   6 -13  -1   60.33    6.55
 -13  -6  -1   55.73    7.60
 -13  -6   1   69.60    8.23
  -6  13   1   65.20    9.71
  -6  13   1   70.96    8.61
   6 -13   1   64.82    7.63
  13   5  -1  451.18   21.83
 -13  -5  -1  435.53   22.04
  -5  13  -1  457.19   22.53
  -5  13  -1  449.47   22.81
   5 -13  -1  424.67   20.62
 -13  -5  -1  464.53   22.40
 -13  -5   1  439.88   21.84
   5 -13   1  472.13   22.45
  -5  13   1  438.42   24.00
  -5  13   1  449.73   21.93
   4 -13  -1  121.79    9.35
  -4  13  -1  112.75   10.53
  -4  13  -1  117.60   10.41
 -13  -4  -1  112.45   10.04
 -13  -4  -1  109.83   10.03
  -4  13   1  112.32   11.63
 -13  -4   1  117.50   11.13
 -13  -4   1  122.24    9.46
  -4  13   1  113.63    9.89
   4 -13   1  136.86    9.92
 -13  -3  -1  848.56   36.68
  -3  13  -1  837.03   37.22
 -13  -3  -1  798.10   38.24
 -13  -3  -1  852.79   36.24
   3 -13  -1  841.19   36.04
  -3  13  -1  852.98   36.96
 -13  -3   1  832.19   35.50
 -13  -3   1  853.73   37.32
   3 -13   1  835.94   36.57
 -13  -3   1  875.83   39.48
  -3  13   1  799.09   37.74
  -3  13   1  818.78   35.79
   2 -13  -1  577.92   25.73
 -13  -2  -1  533.58   25.71
 -13  -2  -1  552.33   25.13
  -2  13  -1  573.81   25.85
 -13  -2  -1  495.13   27.29
  -2  13  -1  571.78   26.48
 -13  -2   1  564.32   24.68
   2 -13   1  547.22   26.34
  -2  13   1  534.05   27.20
 -13  -2   1  552.84   26.71
 -13  -2   1  548.04   28.25
  -2  13   1  565.50   25.21
  -1  13  -1   28.47    5.91
 -13  -1  -1   22.17    6.45
   1 -13  -1   20.05    5.46
  -1  13  -1   22.59    5.57
 -13  -1  -1   19.87    4.64
 -13  -1  -1   18.77    5.80
  -1  13   1   19.78    4.81
   1 -13   1   30.98    6.23
  -1  13   1   20.62    6.20
 -13  -1   1   23.58    7.95
 -13  -1   1   34.78    6.79
 -13  -1   1   24.89    4.39
 -13  -1   1   25.91    5.91
   0  13  -1  120.47   10.56
   0 -13  -1  118.12    9.59
 -13   0  -1  120.25    9.92
 -13   0  -1  124.92    8.91
   0  13  -1  106.03    9.69
 -13   0  -1  132.27   12.28
   0 -13   1  100.34   10.25
   0  13   1  113.43   11.13
 -13   0   1  100.29   11.40
 -13   0   1  115.69   10.78
   0  13   1  118.76    8.65
 -13   0   1  106.97    7.54
 -13   0   1  114.98   10.87
 -13   1  -1   11.71    6.70
   1  13  -1    7.50    4.51
 -13   1  -1   10.39    5.60
  -1 -13  -1   21.10    6.08
   1  13  -1   18.20    5.32
 -13   1   1   15.60    6.56
  -1 -13   1   21.81    5.98
   1  13   1   27.58    6.19
 -13   1   1   18.70    3.42
 -13   1   1   18.32    6.05
 -13   1   1    9.67    5.78
   1  13   1   13.16    4.26
   2  13  -1  127.07    9.57
 -13   2  -1  126.44   12.35
   2  13  -1  129.24   11.34
 -13   2  -1  128.50   10.44
  -2 -13  -1  102.11   10.27
 -13   2  -1  144.87   10.41
   2  13   1  144.93   11.39
  13  -2   1  123.78    8.61
 -13   2   1  124.79    7.55
 -13   2   1  121.25   12.60
 -13   2   1  128.27   10.65
  -2 -13   1  126.25   11.05
 -13   2   1  100.24   10.21
   2  13   1  126.69    9.03
   3  13  -1   49.08    6.87
  -3 -13  -1   44.15    7.34
 -13   3  -1   43.72    6.28
   3  13  -1   57.19    7.47
  13  -3  -1   55.64    4.78
 -13   3  -1   41.00    7.02
 -13   3   1   36.01    9.37
   3  13   1   45.69    5.80
 -13   3   1   40.05    7.19
   3  13   1   55.85    7.92
  13  -3   1   63.42    6.34
  -3 -13   1   55.68    8.19
 -13   3   1   38.75    7.10
  13  -4  -1  171.89    8.78
   4  13  -1  157.49   12.36
 -13   4  -1  170.40   11.62
  -4 -13  -1  187.33   13.47
 -13   4  -1  163.40   12.30
   4  13  -1  173.78   11.87
   4  13   1  187.94   11.04
 -13   4   1  176.31   13.32
  -4 -13   1  177.16   14.01
  13  -4   1  198.72   11.18
   4  13   1  175.99   13.41
 -13   4   1  176.15   12.82
   5  13  -1  263.37   16.37
 -13   5  -1  264.07   15.06
  13  -5  -1  270.73   11.83
  -5 -13  -1  259.70   17.04
   5  13  -1  261.14   15.24
 -13   5  -1  280.64   16.48
  -5 -13   1  264.16   17.64
   5  13   1  284.14   17.30
   5  13   1  266.64   14.42
 -13   5   1  276.60   17.24
  13  -5   1  283.82   14.30
 -13   5   1  283.90   16.76
 -13   6  -1  163.91   12.41
 -13   6  -1  167.68   11.52
  13  -6  -1  160.42    7.11
   6  13  -1  150.93   12.61
   6  13  -1  129.60   11.30
  -6 -13  -1  157.03   12.88
 -13   6   1  148.74   13.36
  -6 -13   1  181.82   14.29
  13  -6   1  172.25   10.24
 -13   6   1  162.61   12.85
   6  13   1  159.14   10.59
   6  13   1  166.41   13.21
   7  13  -1  307.95   17.80
 -13   7  -1  320.68   17.54
  -7 -13  -1  339.28   19.42
 -13   7  -1  319.50   18.66
   7  13  -1  319.70   19.12
   7  13   1  319.23   19.02
 -13   7   1  300.85   18.18
   7  13   1  281.11   15.95
 -13   7   1  355.38   19.55
  13  -7   1  339.39   15.67
  -7 -13   1  293.53   19.33
  -8 -13  -1  109.09   11.73
 -13   8  -1  100.66    9.67
   8  13  -1  116.99   10.79
 -13   8  -1  107.76   11.14
   8  13  -1  101.92   11.05
  -8 -13   1   95.82   11.58
   8  13   1  102.15   11.17
  13  -8   1  108.48    8.04
 -13   8   1   98.54   10.90
   8  13   1  110.24    9.40
 -13   8   1  105.93   11.05
  -9 -13  -1   10.04    6.67
 -13   9  -1   10.38    5.74
 -13   9  -1   11.02    6.46
   9  13  -1   11.64    6.27
   9  13  -1   10.07    6.32
   9  13   1   12.41    5.43
   9  13   1    8.05    6.93
 -13   9   1    2.47    5.85
 -13   9   1    3.69    6.50
  -9 -13   1    4.67    6.63
  13  -9   1   15.21    4.25
 -13  10  -1   65.90   10.03
 -10 -13  -1   93.49   11.73
  10  13  -1   60.84    9.02
 -13  10  -1   66.26    8.72
  10  13  -1  108.17   11.89
  10  13   1   82.04   10.33
  10  13   1   66.91    8.40
  13 -10   1   87.16    7.58
 -10 -13   1   88.85   11.21
 -13  10   1   90.70   11.37
 -13  10   1   71.46   10.03
 -11 -13  -1   34.27    8.41
 -13  11  -1   51.53    8.20
  11  13  -1   35.35    8.83
  11  13  -1   32.63    7.84
 -13  11  -1   33.91    8.27
  11  13   1   33.69    6.79
  11  13   1   36.50    9.13
 -13  11   1   50.93    9.37
  13 -11   1   48.48    5.94
 -13  11   1   32.66    8.64
 -11 -13   1   45.81    9.37
  12  13  -1   54.32    9.88
 -13  12  -1   48.26    9.18
  12  13  -1   30.92    7.80
 -12 -13  -1   38.17    8.88
 -13  12  -1   49.74    8.45
 -12 -13   1   49.23    9.52
 -13  12   1   44.86    9.65
  13 -12   1   52.11    6.17
  12  13   1   54.98    7.99
 -13  12   1   56.53    9.83
  12  13   1   44.38    9.61
  13  13  -1   98.97   12.39
 -13  13  -1   80.54   11.31
 -13 -13  -1  105.47   12.93
 -13  13  -1  101.30   11.10
  13  13  -1   95.02   11.44
  13  13   1   90.68   10.34
 -13 -13   1  107.27   12.49
 -13  13   1  100.92   12.82
 -13  13   1   82.93   11.15
  13  13   1   88.62   12.23
  14  13  -1  163.34   14.41
  14  13  -1  137.88   14.54
 -14 -13  -1  143.80   14.57
 -13  14  -1  152.69   13.84
 -13  14  -1  123.73   13.73
 -14 -13   1  172.08   14.39
  14  13   1  136.35   14.39
  14  13   1  141.31   12.81
 -13  14   1  138.18   15.37
 -13  14   1  119.24   13.02
 -14 -12  -1  235.33   17.15
  14  12  -1  249.22   17.01
 -12  14  -1  240.62   17.14
  14  12  -1  227.57   18.22
 -12  14  -1  234.20   17.09
  14  12   1  209.62   15.30
  12 -14   1  225.37   13.30
 -12  14   1  229.42   18.43
 -12  14   1  226.58   17.11
 -14 -12   1  250.69   17.76
  14  12   1  233.95   17.31
 -11  14  -1  122.79   12.80
 -14 -11  -1  145.43   14.08
  14  11  -1  153.88   13.17
 -11  14  -1  127.28   13.27
 -14 -11   1  136.87   13.71
  14  11   1  118.36   13.40
  11 -14   1  133.76   10.32
  14  11   1  140.80   11.51
 -11  14   1  142.08   14.86
 -11  14   1  117.64   12.58
 -10  14  -1  220.45   16.54
  10 -14  -1  248.46   12.24
 -10  14  -1  230.90   17.03
 -14 -10  -1  214.08   16.52
  14  10  -1  220.88   15.87
  10 -14   1  218.17   13.39
 -10  14   1  237.29   18.87
 -10  14   1  229.20   16.42
 -14 -10   1  225.50   16.32
  14  10   1  220.56   14.40
  14  10   1  213.68   16.13
 -14  -9  -1    3.60    5.90
   9 -14  -1    3.39    3.77
  -9  14  -1    3.83    6.19
  14   9  -1    8.47    5.88
  -9  14  -1   -6.48    5.61
  14   9   1   -4.73    5.12
  -9  14   1    2.34    6.02
  -9  14   1    1.46    6.74
   9 -14   1    8.58    5.01
 -14  -9   1   -1.33    5.21
  14   9   1    2.76    4.81
  -8  14  -1   25.01    7.21
  -8  14  -1   25.75    7.34
   8 -14  -1   18.31    4.55
 -14  -8  -1   38.24    7.96
  14   8  -1   23.18    6.26
  -8  14   1   11.25    6.56
   8 -14   1   19.73    5.55
  -8  14   1   12.08    7.13
  14   8   1   27.63    6.24
 -14  -8   1   11.97    5.84
   7 -14  -1  141.96    9.70
 -14  -7  -1  145.89   11.63
  -7  14  -1  135.55   12.05
  -7  14  -1  131.53   12.46
  14   7  -1  139.95   11.79
  14   7   1  153.97   11.26
  -7  14   1  147.04   12.29
 -14  -7   1  173.40   12.50
  -7  14   1  108.34   12.48
   7 -14   1  134.53   11.25
  -6  14  -1  123.26   11.87
   6 -14  -1  124.02    9.32
 -14  -6  -1   92.64    9.96
  14   6  -1  131.00   11.45
  -6  14  -1  117.49   11.67
   6 -14   1  122.32   10.29
  -6  14   1  101.10   11.36
  -6  14   1  115.40   10.14
 -14  -6   1  105.26    9.65
   5 -14  -1  201.23   11.96
 -14  -5  -1  174.58   12.50
  -5  14  -1  190.52   14.35
  -5  14  -1  190.00   13.93
 -14  -5  -1  188.30   13.14
  -5  14   1  184.84   14.41
 -14  -5   1  180.44   11.99
  -5  14   1  192.30   13.29
   5 -14   1  201.35   13.18
  -4  14  -1  409.07   21.79
  -4  14  -1  389.64   21.78
 -14  -4  -1  421.99   21.38
   4 -14  -1  432.89   20.59
 -14  -4  -1  430.87   21.34
 -14  -4   1  402.51   20.34
  -4  14   1  412.09   22.68
 -14  -4   1  426.52   22.40
  -4  14   1  412.68   20.99
   4 -14   1  420.27   21.10
  -3  14  -1   73.19    8.83
  -3  14  -1   50.60    7.55
 -14  -3  -1   73.40   10.48
   3 -14  -1   43.99    6.90
 -14  -3  -1   59.36    7.26
 -14  -3  -1   69.15    8.32
  -3  14   1   55.19    7.38
   3 -14   1   75.51    8.83
 -14  -3   1   78.92   11.61
  -3  14   1   64.08    9.18
 -14  -3   1   64.09    7.21
 -14  -3   1   69.11    9.20
 -14  -2  -1   53.80    7.40
  -2  14  -1   46.91    6.98
 -14  -2  -1   64.45    9.86
   2 -14  -1   59.88    7.62
  -2  14  -1   50.59    7.49
 -14  -2  -1   45.25    6.40
 -14  -2   1   58.17    8.14
   2 -14   1   53.47    8.17
  -2  14   1   43.95    7.71
 -14  -2   1   50.00    6.27
  -2  14   1   65.94    7.54
 -14  -2   1   56.68   10.19
  -1  14  -1  214.91   13.31
 -14  -1  -1  206.81   12.73
   1 -14  -1  218.29   13.89
 -14  -1  -1  212.14   15.43
 -14  -1  -1  219.67   13.73
  -1  14  -1  215.09   14.52
 -14  -1   1  209.97   11.74
 -14  -1   1  198.58   15.95
  -1  14   1  230.76   12.94
   1 -14   1  191.93   14.29
  -1  14   1  226.99   15.06
 -14  -1   1  198.89   15.00
 -14  -1   1  218.59   14.23
   0  14  -1   32.97    6.89
 -14   0  -1   33.78    5.55
 -14   0  -1   25.38    6.24
   0 -14  -1   33.44    7.02
   0  14  -1   45.12    7.08
 -14   0  -1   47.34    9.17
   0  14   1   34.59    5.77
   0 -14   1   30.82    6.90
 -14   0   1   40.53    5.15
 -14   0   1   46.60    7.55
 -14   0   1   27.70    6.41
 -14   0   1   33.68    8.85
   0  14   1   32.94    7.39
 -14   1  -1  444.97   24.80
 -14   1  -1  438.44   22.77
  -1 -14  -1  445.86   23.18
   1  14  -1  459.30   23.62
   1  14  -1  470.54   22.56
 -14   1   1  438.80   23.10
   1  14   1  472.87   21.30
  14  -1   1  435.31   21.00
  -1 -14   1  453.29   23.40
   1  14   1  450.64   23.72
 -14   1   1  453.00   23.47
 -14   1   1  451.04   24.89
 -14   1   1  455.47   20.08
 -14   2  -1  326.95   20.39
 -14   2  -1  315.95   17.88
   2  14  -1  325.83   17.81
   2  14  -1  339.00   19.28
  14  -2  -1  329.65   15.31
  -2 -14  -1  347.93   18.88
 -14   2  -1  354.01   18.87
   2  14   1  359.33   20.21
  14  -2   1  343.44   17.06
   2  14   1  324.95   16.97
 -14   2   1  299.79   18.98
 -14   2   1  341.55   20.76
 -14   2   1  352.64   19.31
  -2 -14   1  369.45   20.19
 -14   3  -1   58.44    8.40
 -14   3  -1   60.16    7.34
 -14   3  -1   62.47    9.81
  14  -3  -1   63.84    5.44
   3  14  -1   80.70    9.32
  -3 -14  -1   58.58    8.91
   3  14  -1   63.85    7.79
 -14   3   1   61.86    8.64
 -14   3   1   61.87    8.62
  14  -3   1   73.42    7.27
  -3 -14   1   56.94    8.79
   3  14   1   67.24    9.31
   3  14   1   67.35    7.20
 -14   3   1   77.53   11.27
   4  14  -1   77.20    9.56
  -4 -14  -1   66.65    9.19
 -14   4  -1   74.22    8.03
   4  14  -1   67.38    8.19
  14  -4  -1   66.23    5.49
 -14   4  -1   71.44    9.06
  14  -4   1   77.04    7.33
 -14   4   1   70.15    8.84
   4  14   1   68.91    9.64
  -4 -14   1   61.94    9.34
 -14   4   1   62.27    8.68
   4  14   1   57.22    6.80
  -5 -14  -1    8.99    6.15
 -14   5  -1    1.89    4.52
 -14   5  -1    4.92    5.76
   5  14  -1   -7.91    4.64
  14  -5  -1    3.84    2.32
   5  14  -1   13.53    6.39
 -14   5   1   -2.06    5.31
   5  14   1    7.32    4.31
 -14   5   1    2.98    5.56
   5  14   1    5.10    6.40
  14  -5   1    1.77    3.51
  -5 -14   1    2.73    5.86
   6  14  -1   64.06    8.15
   6  14  -1   56.24    8.77
  14  -6  -1   73.49    4.42
 -14   6  -1   64.87    9.90
 -14   6  -1   68.80    7.90
  -6 -14  -1   64.08    9.41
 -14   6   1   70.24    9.52
   6  14   1   58.82    8.94
 -14   6   1   50.25    8.34
  -6 -14   1   71.35    9.90
  14  -6   1   73.84    6.95
   6  14   1   62.49    7.15
  -7 -14  -1   52.63    9.18
   7  14  -1   56.36    8.93
   7  14  -1   64.33    8.36
 -14   7  -1   47.38    7.26
 -14   7  -1   59.75    8.94
   7  14   1   59.80    7.00
   7  14   1   44.12    8.59
  14  -7   1   69.66    6.66
 -14   7   1   62.47    9.09
 -14   7   1   52.94    8.85
  -7 -14   1   46.62    9.02
 -14   8  -1   94.68    9.71
   8  14  -1  102.47   10.37
 -14   8  -1   98.65   11.23
  -8 -14  -1   92.97   11.38
   8  14  -1   89.05   10.80
   8  14   1   84.69    8.59
  -8 -14   1   90.45   11.94
   8  14   1   82.49   10.46
  14  -8   1   91.41    7.56
 -14   8   1   92.11   10.80
 -14   8   1  100.03   11.45
  -9 -14  -1  247.99   17.19
 -14   9  -1  267.51   17.19
   9  14  -1  244.42   17.41
 -14   9  -1  236.73   15.62
   9  14  -1  219.72   15.76
   9  14   1  240.50   17.36
   9  14   1  245.94   14.74
  -9 -14   1  229.12   17.84
 -14   9   1  244.17   17.50
 -14   9   1  245.04   16.84
  14  -9   1  244.13   12.87
 -14  10  -1  277.83   19.32
  10  14  -1  317.96   21.02
 -14  10  -1  335.97   18.65
 -10 -14  -1  339.89   20.59
  10  14  -1  317.68   19.12
  14 -10   1  299.83   15.24
 -14  10   1  318.20   20.37
 -10 -14   1  334.91   20.53
  10  14   1  286.44   17.16
  10  14   1  308.35   20.12
 -14  10   1  345.92   20.09
 -11 -14  -1  102.71   12.76
  11  14  -1  108.77   12.90
  11  14  -1  129.53   12.44
 -14  11  -1  112.96   11.00
 -14  11  -1  106.35   12.23
 -14  11   1  112.35   12.58
 -14  11   1  122.01   13.54
  11  14   1  130.17   14.03
 -11 -14   1  122.02   13.66
  11  14   1  109.20   10.77
  12  14  -1   13.19    7.64
 -14  12  -1   10.61    5.82
 -12 -14  -1   -2.40    6.43
  12  14  -1    1.70    6.26
 -14  12  -1    2.85    6.34
  12  14   1    7.39    5.31
 -12 -14   1   -7.12    6.58
 -14  12   1    4.79    6.58
  12  14   1    1.81    7.55
 -14  12   1    5.86    7.67
 -13 -14  -1  131.01   14.17
 -14  13  -1  133.46   14.06
  13  14  -1  125.38   13.86
  13  14  -1  126.22   12.98
 -14  13  -1  145.79   13.19
 -14  13   1  143.76   14.36
  13  14   1  132.46   12.01
 -14  13   1  113.60   13.95
  13  14   1  140.23   14.32
 -13 -14   1  137.29   14.57
 -14  14  -1    6.13    6.63
 -14 -14  -1   -4.63    7.49
 -14  14  -1    0.77    6.63
  14  14  -1    7.99    7.15
  14  14  -1   11.75    7.46
  14  14   1   -0.04    7.98
 -14  14   1    7.48    7.44
 -14 -14   1   -1.25    6.51
 -14  14   1   16.33    7.52
  14  14   1   -2.48    5.84
  15  14  -1   22.37    8.41
 -15 -14  -1   37.67    9.18
  15  14  -1   20.27    8.95
 -14  15  -1   25.94    8.65
 -14  15  -1   30.53    7.80
 -14  15   1   32.08    8.41
 -14  15   1   33.36    9.73
 -15 -14   1   17.01    8.30
  15  14   1   45.18   10.38
  15  14   1   35.76    7.86
 -15 -13  -1  174.44   16.54
 -13  15  -1  150.47   14.42
  15  13  -1  168.30   14.73
 -13  15  -1  137.53   15.27
  15  13  -1  153.95   15.76
 -13  15   1  140.83   14.20
 -15 -13   1  146.34   15.15
 -13  15   1  131.35   15.17
  15  13   1  119.75   13.81
  15  13   1  139.31   13.00
 -15 -12  -1  128.16   13.56
 -12  15  -1  132.19   13.05
  15  12  -1  121.62   12.84
  15  12  -1  106.61   12.66
 -12  15  -1  147.77   14.44
 -12  15   1  129.16   15.07
 -12  15   1  142.93   14.50
 -15 -12   1  140.88   14.02
  15  12   1  137.58   14.12
  15  12   1  146.91   12.87
 -11  15  -1  147.70   14.87
 -11  15  -1  160.24   14.85
 -15 -11  -1  149.14   14.82
  15  11  -1  160.63   13.83
  15  11   1  167.06   13.02
 -11  15   1  163.47   14.03
 -15 -11   1  158.26   14.00
  15  11   1  198.24   16.65
 -11  15   1  161.65   16.02
 -10  15  -1  220.75   16.70
  15  10  -1  223.84   15.46
 -10  15  -1  174.64   15.80
 -15 -10  -1  195.75   15.30
  10 -15  -1  195.94   12.73
 -10  15   1  195.04   15.40
  10 -15   1  185.38   12.41
  15  10   1  176.60   15.04
 -15 -10   1  176.91   14.19
 -10  15   1  194.81   17.31
  15  10   1  183.11   13.40
 -15  -9  -1   53.86    9.46
   9 -15  -1   62.49    6.56
  -9  15  -1   56.65    9.41
  -9  15  -1   50.80    9.06
  15   9  -1   69.74    9.63
  15   9   1   64.95    8.42
  -9  15   1   60.29    9.39
  -9  15   1   48.09   10.43
  15   9   1   64.29    9.98
   9 -15   1   58.16    7.73
 -15  -9   1   63.76    8.99
  -8  15  -1    2.11    5.81
   8 -15  -1    9.63    4.36
  -8  15  -1    5.50    6.33
 -15  -8  -1   10.16    6.41
  15   8  -1   -5.67    5.47
 -15  -8   1    3.38    5.27
   8 -15   1    8.65    5.12
  15   8   1    3.36    5.14
  -8  15   1   -3.53    5.87
  -8  15   1   10.74    7.38
   7 -15  -1   47.64    6.34
  -7  15  -1   45.78    8.43
 -15  -7  -1   48.83    7.93
  15   7  -1   47.03    8.11
  -7  15  -1   38.00    8.30
  -7  15   1   32.75    8.93
   7 -15   1   26.70    6.84
  -7  15   1   51.78    8.55
  15   7   1   42.29    7.14
 -15  -7   1   50.38    7.55
  15   6  -1   62.93    8.93
 -15  -6  -1   70.47    8.67
  -6  15  -1   44.84    8.50
   6 -15  -1   68.22    7.49
  -6  15  -1   68.72    9.11
   6 -15   1   75.19    8.90
 -15  -6   1   65.63    8.74
  -6  15   1   72.34    9.28
  -6  15   1   67.97    9.85
  -5  15  -1  293.06   18.60
 -15  -5  -1  306.98   17.60
  -5  15  -1  277.14   17.95
 -15  -5  -1  290.42   17.59
   5 -15  -1  298.20   16.12
 -15  -5   1  296.35   17.16
  -5  15   1  313.09   17.82
  -5  15   1  325.09   20.39
   5 -15   1  305.12   17.75
 -15  -4  -1  325.25   18.06
   4 -15  -1  336.47   17.89
  -4  15  -1  343.43   19.20
  -4  15  -1  304.17   19.04
 -15  -4  -1  313.73   18.29
   4 -15   1  357.11   19.21
 -15  -4   1  360.64   20.18
  -4  15   1  338.99   18.57
 -15  -4   1  307.62   17.56
  -4  15   1  326.02   20.19
 -15  -3  -1    5.97    4.84
  -3  15  -1   -1.80    5.07
  -3  15  -1   -5.09    5.41
 -15  -3  -1    9.35    5.87
 -15  -3  -1    5.99    7.43
   3 -15  -1   10.82    5.28
   3 -15   1   -0.13    4.86
  -3  15   1    0.37    5.12
 -15  -3   1    5.95    7.25
 -15  -3   1    4.03    4.50
 -15  -3   1   13.64    6.19
  -3  15   1    4.42    4.98
 -15  -2  -1  269.95   19.03
 -15  -2  -1  294.18   15.72
  -2  15  -1  254.68   16.42
   2 -15  -1  275.57   16.25
 -15  -2  -1  264.16   16.36
  -2  15  -1  289.17   17.41
  -2  15   1  283.23   15.65
  -2  15   1  257.34   17.42
 -15  -2   1  272.42   14.65
   2 -15   1  267.89   16.94
 -15  -2   1  271.02   16.82
 -15  -2   1  248.35   18.83
   1 -15  -1   20.51    6.56
 -15  -1  -1   33.07    7.29
 -15  -1  -1   28.70    7.90
  -1  15  -1   38.46    7.10
  -1  15  -1   27.30    6.91
 -15  -1  -1   32.62    5.84
  -1  15   1   33.09    7.83
   1 -15   1   30.71    7.72
  -1  15   1   39.14    6.49
 -15  -1   1   30.74    7.66
 -15  -1   1   29.53    5.30
 -15  -1   1   29.66    9.48
 -15   0  -1   37.61    8.43
   0 -15  -1   38.85    7.26
   0  15  -1   61.63    8.73
 -15   0  -1   54.51    6.72
   0  15  -1   42.20    6.94
 -15   0  -1   36.18    7.02
 -15   0   1   54.34    8.35
   0  15   1   42.84    6.72
 -15   0   1   43.19    7.98
 -15   0   1   55.39   10.73
   0 -15   1   40.02    7.85
 -15   0   1   48.80    5.84
   0  15   1   46.00    8.58
  -1 -15  -1  606.75   29.76
   1  15  -1  624.58   30.51
 -15   1  -1  671.09   32.31
 -15   1  -1  651.17   30.45
   1  15  -1  589.88   28.95
  15  -1   1  572.53   27.31
 -15   1   1  605.96   29.80
 -15   1   1  592.42   31.54
  -1 -15   1  584.58   29.65
   1  15   1  631.08   27.66
 -15   1   1  628.08   26.42
 -15   1   1  633.85   30.02
   1  15   1  658.61   31.29
  -2 -15  -1   45.12    8.55
   2  15  -1   43.50    8.19
   2  15  -1   36.66    7.10
  15  -2  -1   50.67    5.33
 -15   2  -1   51.98    8.07
 -15   2  -1   34.61    8.79
  -2 -15   1   65.42    9.18
   2  15   1   65.11    9.13
 -15   2   1   43.24    9.64
   2  15   1   56.00    6.96
 -15   2   1   48.66    8.35
  15  -2   1   59.48    6.90
 -15   2   1   44.81    7.89
  15  -3  -1   65.33    5.80
   3  15  -1   63.91    8.35
 -15   3  -1   72.45   11.43
   3  15  -1   44.51    8.51
  -3 -15  -1   58.46    8.76
 -15   3  -1   65.49    9.04
 -15   3  -1   57.59    7.55
  -3 -15   1   64.67    9.92
   3  15   1   56.06    6.99
   3  15   1   47.09    8.74
 -15   3   1   61.37   10.43
 -15   3   1   56.06    8.65
 -15   3   1   45.71    8.21
  15  -3   1   59.47    6.90
 -15   4  -1   89.31   10.77
 -15   4  -1   75.98    8.39
  15  -4  -1   66.52    5.75
   4  15  -1   78.61    8.91
  -4 -15  -1   54.48    9.02
   4  15  -1   68.16    8.97
 -15   4   1   76.00    9.94
   4  15   1   81.12    7.96
   4  15   1   62.60    9.30
  15  -4   1   83.21    7.93
  -4 -15   1   64.43    9.88
 -15   4   1   66.82    9.40
 -15   4   1   76.00   11.46
   5  15  -1   19.70    6.52
  -5 -15  -1   25.99    7.86
 -15   5  -1   29.07    7.31
   5  15  -1   28.61    7.54
 -15   5  -1   22.47    5.99
  15  -5  -1   25.94    3.56
  -5 -15   1   26.95    7.89
   5  15   1   27.00    7.31
 -15   5   1   29.08    7.60
 -15   5   1   24.55    7.59
   5  15   1   24.78    5.55
  15  -5   1   25.01    5.10
 -15   6  -1   97.77   11.01
   6  15  -1   82.10    9.52
 -15   6  -1   91.93    9.32
  -6 -15  -1  103.10   12.36
   6  15  -1   94.33   10.79
   6  15   1   87.98    8.44
 -15   6   1   88.94   11.17
  -6 -15   1   76.77   10.69
   6  15   1   91.45   11.89
  15  -6   1   94.04    7.89
 -15   6   1   94.87   10.39
 -15   7  -1   16.40    7.84
   7  15  -1   12.52    6.14
   7  15  -1    7.12    6.38
 -15   7  -1   18.19    5.74
  -7 -15  -1   10.49    7.17
 -15   7   1   19.52    7.36
   7  15   1   18.14    5.47
   7  15   1   19.98    7.88
  15  -7   1   19.87    4.65
  -7 -15   1   11.62    7.58
 -15   7   1   20.26    7.24
   8  15  -1   65.21    8.99
 -15   8  -1   57.36   10.24
 -15   8  -1   60.00    8.31
   8  15  -1   72.46   10.28
  -8 -15  -1   70.60   10.53
   8  15   1   56.60    9.65
  15  -8   1   77.18    6.91
  -8 -15   1   65.49   10.68
   8  15   1   70.09    8.12
 -15   8   1   69.56   10.69
 -15   8   1   59.38   10.09
   9  15  -1  227.88   15.85
 -15   9  -1  238.72   16.97
  -9 -15  -1  240.50   17.47
 -15   9  -1  236.04   15.64
   9  15  -1  245.32   17.74
 -15   9   1  234.64   18.38
   9  15   1  254.99   18.29
   9  15   1  266.07   15.17
  -9 -15   1  237.27   18.50
 -15   9   1  249.46   18.11
  10  15  -1  199.62   16.77
 -15  10  -1  214.91   17.13
 -15  10  -1  234.67   15.22
  10  15  -1  197.40   15.27
 -10 -15  -1  214.62   16.64
  10  15   1  207.00   13.91
 -15  10   1  209.04   16.11
 -10 -15   1  230.97   17.14
 -15  10   1  215.61   17.78
  10  15   1  222.02   17.22
  11  15  -1   86.75   11.53
 -15  11  -1   90.18    9.87
 -15  11  -1   65.65   11.50
  11  15  -1   87.69   11.04
 -11 -15  -1   99.08   12.49
  11  15   1   91.96   12.64
 -11 -15   1   63.73   10.96
  11  15   1  110.66   10.37
 -15  11   1   63.38   10.84
 -15  11   1   80.20   11.38
  12  15  -1  194.82   15.03
  12  15  -1  152.25   15.81
 -15  12  -1  152.52   15.25
 -15  12  -1  163.13   14.09
 -12 -15  -1  172.61   16.85
  12  15   1  145.25   12.59
  12  15   1  180.43   16.72
 -15  12   1  148.06   14.94
 -15  12   1  137.02   14.25
 -12 -15   1  157.61   16.28
  13  15  -1   30.64    8.21
 -15  13  -1   22.18    7.17
 -13 -15  -1   34.00   10.23
 -15  13  -1   17.53    9.14
  13  15  -1   31.98    8.58
  13  15   1   23.24    7.20
  13  15   1   26.57    8.95
 -15  13   1   18.60    8.45
 -13 -15   1   17.30    9.13
 -15  13   1   22.83    8.18
 -15  14  -1   37.79    7.92
  14  15  -1   55.09   10.82
  14  15  -1   63.92    9.89
 -15  14  -1   58.81   11.41
 -14 -15  -1   51.96   10.38
  14  15   1   46.95    8.61
 -15  14   1   39.68    9.35
  14  15   1   47.66   10.77
 -14 -15   1   35.04    9.75
 -15  14   1   44.07   10.13
 -15  15  -1   -4.23    7.68
  15  15  -1    4.46    7.41
 -15  15  -1   -4.23    9.29
  15  15  -1   -2.96    6.46
 -15 -15  -1   -4.83    6.80
 -15  15   1    8.23    8.07
 -15 -15   1   -0.15    7.52
  15  15   1   -0.08    7.69
  15  15   1   -2.05    5.89
 -15  15   1    9.15    7.32
  16  15  -1   51.07   10.25
  16  15  -1   51.02   10.56
 -16 -15  -1   58.18   11.92
 -15  16  -1   48.77   10.56
  16  15   1   57.58   12.26
  16  15   1   51.37    9.25
 -15  16   1   69.22   11.35
 -15  16   1   60.08   11.78
 -16 -15   1   37.30    9.86
 -16 -14  -1   49.61   10.41
 -14  16  -1   51.42   10.81
  16  14  -1   59.98   10.80
 -14  16  -1   46.69    9.10
  16  14  -1   31.66    9.57
  16  14   1   62.81   11.73
 -14  16   1   44.17   10.76
 -16 -14   1   45.20    9.77
 -14  16   1   35.23    8.93
  16  14   1   43.73    9.17
  16  13  -1   76.14   11.15
 -13  16  -1   66.30   10.80
 -16 -13  -1   79.39   11.59
 -13  16  -1   54.79    9.93
  16  13  -1   76.81   11.35
 -16 -13   1   86.42   12.22
  16  13   1   76.42   12.40
  16  13   1   49.83    9.33
 -13  16   1   67.50   10.67
 -13  16   1   87.98   12.80
 -12  16  -1   -6.81    6.07
 -12  16  -1    2.28    7.56
  16  12  -1    2.89    6.68
 -16 -12  -1   -2.17    7.08
 -12  16   1   -0.47    7.32
 -12  16   1    6.90    6.53
  16  12   1    6.51    5.90
  16  12   1   -2.55    5.95
 -16 -12   1   -1.59    6.67
 -11  16  -1  105.54   13.20
  16  11  -1  109.22   12.19
 -16 -11  -1  125.07   13.12
 -11  16  -1  128.51   13.53
 -11  16   1  118.94   13.31
  16  11   1  111.19   11.55
 -11  16   1   94.52   13.33
  11 -16   1  109.42    9.94
 -16 -11   1  106.13   12.74
  16  11   1  126.18   12.96
 -10  16  -1   27.15    8.23
 -10  16  -1   14.78    7.91
  16  10  -1   38.14    8.20
 -16 -10  -1   33.10    8.11
 -10  16   1   28.36    7.67
  10 -16   1   16.43    5.68
 -10  16   1   18.71    9.00
 -16 -10   1   24.60    7.38
  16  10   1   34.12    7.28
  16  10   1   25.67    8.02
   9 -16  -1  140.73    9.39
  16   9  -1  115.62   12.24
 -16  -9  -1  111.48   12.49
  -9  16  -1  106.59   12.25
  -9  16  -1  103.67   12.47
   9 -16   1  101.31    9.99
  -9  16   1  102.20   11.97
  -9  16   1  132.20   14.90
  16   9   1   92.39   11.12
  16   9   1  129.71   11.23
 -16  -9   1   97.71   11.41
  -8  16  -1  354.61   21.44
   8 -16  -1  355.60   17.64
  -8  16  -1  314.96   20.87
  16   8  -1  343.35   19.82
 -16  -8  -1  362.37   21.00
  16   8   1  343.90   18.92
   8 -16   1  349.14   18.42
  -8  16   1  310.28   19.81
 -16  -8   1  341.24   19.44
  -8  16   1  315.07   22.05
 -16  -7  -1   93.88   10.57
  -7  16  -1  109.33   11.64
   7 -16  -1  102.64    9.28
  16   7  -1  131.05   12.01
  -7  16  -1   85.53   11.27
 -16  -7   1   95.50   10.20
  -7  16   1  103.87   13.02
  -7  16   1  105.65   11.42
  16   7   1  101.99   10.23
   7 -16   1   99.56    9.99
   6 -16  -1  223.60   13.96
  16   6  -1  231.81   15.08
  -6  16  -1  218.79   15.61
  -6  16  -1  259.79   17.73
 -16  -6  -1  227.99   15.19
  -6  16   1  208.12   17.79
 -16  -6   1  232.36   15.08
  -6  16   1  241.91   15.15
   6 -16   1  225.52   14.92
   5 -16  -1   38.55    6.75
  -5  16  -1   36.55    8.18
  -5  16  -1   45.95    8.50
 -16  -5  -1   41.10    7.71
 -16  -5  -1   37.64    7.38
  -5  16   1   41.97    9.21
  -5  16   1   30.62    7.28
   5 -16   1   42.89    7.80
 -16  -5   1   37.31    6.78
 -16  -4  -1    6.05    5.69
   4 -16  -1   18.04    5.89
  -4  16  -1    9.69    5.89
  -4  16  -1    6.87    6.56
 -16  -4  -1    3.16    5.33
  -4  16   1    6.27    6.86
   4 -16   1   11.17    6.19
  -4  16   1   -7.76    5.03
 -16  -4   1   16.16    5.22
 -16  -4   1   11.74    6.87
   3 -16  -1  193.42   13.17
 -16  -3  -1  164.81   13.81
 -16  -3  -1  180.36   12.65
  -3  16  -1  189.22   13.98
 -16  -3  -1  154.99   15.99
  -3  16  -1  168.12   14.31
 -16  -3   1  164.27   11.43
   3 -16   1  166.60   13.37
 -16  -3   1  160.63   16.66
 -16  -3   1  169.97   13.47
  -3  16   1  145.38   11.94
  -3  16   1  180.74   15.52
 -16  -2  -1   14.34    6.08
   2 -16  -1    9.90    5.87
 -16  -2  -1   14.45    8.65
 -16  -2  -1   12.84    5.13
  -2  16  -1    3.89    5.68
  -2  16  -1   10.84    6.21
 -16  -2   1    8.30    6.20
  -2  16   1    9.38    5.44
   2 -16   1    6.60    6.43
  -2  16   1    8.21    6.70
 -16  -2   1    9.33    4.72
 -16  -2   1    4.43    7.98
 -16  -1  -1   58.13    9.25
  -1  16  -1   84.13    9.76
   1 -16  -1   76.28    9.49
  -1  16  -1   67.78    9.03
 -16  -1  -1   60.83   10.89
 -16  -1  -1   86.69    8.44
  -1  16   1   80.65    8.79
  -1  16   1   59.01    9.64
   1 -16   1   61.94    9.22
 -16  -1   1   93.31    8.22
 -16  -1   1   85.68   12.79
 -16  -1   1   83.45   10.45
 -16   0  -1  152.42   12.38
   0 -16  -1  153.50   12.45
 -16   0  -1  150.14   10.78
   0  16  -1  130.83   12.00
 -16   0  -1  155.05   15.38
   0  16  -1  158.25   13.89
 -16   0   1  137.85   12.59
 -16   0   1  149.47   14.07
   0  16   1  149.93   11.12
   0  16   1  135.38   13.56
 -16   0   1  156.57   10.19
   0 -16   1  155.38   14.01
 -16   0   1  132.65   14.48
  -1 -16  -1  171.28   13.43
 -16   1  -1  176.54   16.54
 -16   1  -1  189.86   13.92
   1  16  -1  166.32   12.33
   1  16  -1  183.87   14.89
 -16   1   1  186.35   10.65
   1  16   1  183.36   14.91
  16  -1   1  169.86   11.42
 -16   1   1  181.31   13.93
  -1 -16   1  134.44   13.53
   1  16   1  159.86   11.96
 -16   1   1  174.49   14.45
 -16   1   1  194.83   17.86
  16  -2  -1   29.31    4.56
 -16   2  -1   21.60    8.36
   2  16  -1   41.75    8.66
 -16   2  -1   21.34    6.99
   2  16  -1   30.71    7.26
  -2 -16  -1   32.65    7.73
 -16   2   1   16.42    7.23
   2  16   1   20.33    7.25
  -2 -16   1   26.56    7.85
  16  -2   1   40.69    5.96
 -16   2   1   35.57   10.02
 -16   2   1   32.48    7.51
   2  16   1   31.33    6.17
   3  16  -1   53.94    9.37
 -16   3  -1   35.78    7.26
  16  -3  -1   71.75    6.28
   3  16  -1   53.57    8.10
 -16   3  -1   61.60   11.53
 -16   3  -1   55.50    9.04
  -3 -16  -1   59.48    9.09
   3  16   1   57.51    7.54
  16  -3   1   70.12    7.44
 -16   3   1   53.04    8.73
 -16   3   1   56.94    9.00
 -16   3   1   83.17   12.87
  -3 -16   1   66.34   10.02
   3  16   1   56.76    9.83
 -16   4  -1    8.76    9.62
  16  -4  -1   15.06    4.19
 -16   4  -1    8.94    5.55
 -16   4  -1   22.01    7.83
   4  16  -1   15.58    6.12
   4  16  -1    8.00    6.93
  -4 -16  -1   22.40    7.32
   4  16   1   17.87    7.11
   4  16   1   10.50    5.18
 -16   4   1   11.99    8.43
 -16   4   1   11.74    6.71
  -4 -16   1   17.66    7.45
 -16   4   1   14.47    6.63
  16  -4   1   16.03    4.95
   5  16  -1  161.80   15.03
 -16   5  -1  195.33   14.53
 -16   5  -1  151.71   12.60
   5  16  -1  169.26   12.94
  -5 -16  -1  156.30   14.05
 -16   5   1  166.26   14.20
  16  -5   1  158.55   10.84
   5  16   1  184.60   11.91
   5  16   1  165.95   15.58
  -5 -16   1  158.86   14.33
 -16   5   1  139.42   15.47
 -16   5   1  165.47   13.97
 -16   6  -1   47.20    7.62
 -16   6  -1   39.27    9.03
  -6 -16  -1   54.40    9.60
   6  16  -1   53.44    9.75
   6  16  -1   50.66    8.26
 -16   6   1   43.00    8.66
   6  16   1   32.20    8.32
  -6 -16   1   30.30    9.15
 -16   6   1   33.26    8.40
   6  16   1   36.02    6.50
  16  -6   1   46.65    5.95
   7  16  -1   54.22   10.01
   7  16  -1   63.90    9.08
  -7 -16  -1   54.94    9.75
 -16   7  -1   70.75   10.16
 -16   7  -1   70.21    8.58
   7  16   1   67.58   11.05
   7  16   1   57.56    7.52
  -7 -16   1   61.51   10.65
 -16   7   1   69.33   10.59
  16  -7   1   63.91    6.73
 -16   7   1   69.22   10.04
  -8 -16  -1  131.09   13.96
   8  16  -1  146.41   14.57
 -16   8  -1  121.33   13.08
   8  16  -1  108.47   11.38
 -16   8  -1  150.40   12.15
   8  16   1  140.74   10.94
   8  16   1  123.03   13.47
 -16   8   1  118.53   13.08
 -16   8   1  129.79   13.33
  -8 -16   1  135.73   14.42
  -9 -16  -1   90.32   12.54
   9  16  -1   69.71   11.44
   9  16  -1   87.24   10.46
 -16   9  -1   83.65    9.58
 -16   9  -1  108.74   12.82
 -16   9   1   78.70   11.82
   9  16   1   65.88   11.01
  -9 -16   1   95.53   12.83
 -16   9   1   84.96   11.38
   9  16   1   92.44    9.16
 -16  10  -1  254.68   18.09
 -16  10  -1  257.86   16.38
 -10 -16  -1  233.16   18.06
  10  16  -1  237.41   16.89
  10  16  -1  237.11   18.50
 -16  10   1  249.13   18.13
 -10 -16   1  245.86   18.69
  10  16   1  277.29   19.42
 -16  10   1  237.47   18.24
  10  16   1  260.75   15.49
  11  16  -1   61.87    9.86
 -16  11  -1   65.70    9.13
  11  16  -1   76.72   11.68
 -11 -16  -1   41.81    9.75
 -16  11  -1   56.49   10.27
  11  16   1   67.39   11.73
  11  16   1   83.94    9.13
 -16  11   1   55.80    9.96
 -11 -16   1   64.19   11.24
 -16  11   1   69.32   10.66
 -16  12  -1   16.25    8.60
  12  16  -1   14.43    7.87
  12  16  -1   15.07    7.40
 -12 -16  -1    5.77    8.31
 -16  12  -1    7.20    5.94
 -16  12   1   12.01    7.77
  12  16   1   24.49    9.30
 -16  12   1   17.37    7.86
 -12 -16   1   10.13    8.10
  12  16   1   22.55    6.82
 -16  13  -1  111.95   11.59
  13  16  -1  120.65   14.99
 -16  13  -1  127.83   14.29
  13  16  -1  139.96   13.71
 -13 -16  -1  123.84   15.20
  13  16   1  107.06   13.53
 -13 -16   1   92.38   13.15
 -16  13   1  117.91   13.78
  13  16   1  135.25   11.85
 -16  13   1   97.29   12.58
  14  16  -1    1.10    6.99
  14  16  -1    5.56    7.65
 -16  14  -1    7.50    7.20
 -14 -16  -1   19.60    8.72
 -16  14   1    8.05    7.50
  14  16   1   -7.90    5.64
  14  16   1  -13.34    6.99
 -16  14   1    2.34    7.53
 -14 -16   1   -6.55    7.64
 -15 -16  -1   40.18   10.35
 -16  15  -1   45.44   10.36
  15  16  -1   77.02   11.13
  15  16  -1   84.97   13.25
 -15 -16   1   63.98   12.39
  15  16   1   52.44   10.92
  15  16   1   84.76   15.30
 -16  15   1   50.80   10.48
 -16  15   1   53.22   11.20
 -16 -16  -1   61.05   11.57
  16  16  -1   51.63   11.95
  16  16  -1   48.51   10.33
 -16  16  -1   70.64   12.40
  16  16   1   57.54   12.56
 -16  16   1   71.02   11.84
 -16 -16   1   62.76   11.60
 -16  16   1   55.31   11.60
  17  16  -1   66.43   11.26
 -17 -16  -1   64.90   12.75
  17  16  -1   53.25   11.34
 -16  17  -1   54.76   11.18
 -17 -16   1   53.30   11.42
 -16  17   1   63.25   12.28
 -16  17   1   53.27   11.90
  17  16   1   74.28   13.58
  17  15  -1  236.20   19.12
 -15  17  -1  226.37   18.70
  17  15  -1  239.01   19.88
 -17 -15  -1  226.70   18.78
  17  15   1  264.99   21.88
 -15  17   1  212.53   20.62
  17  15   1  312.93   25.91
 -17 -15   1  192.23   18.19
 -15  17   1  262.29   20.12
 -14  17  -1   91.75   13.25
  17  14  -1   79.11   13.27
  17  14  -1   71.38   11.85
 -17 -14  -1   70.80   11.91
 -14  17   1   57.31   11.11
 -14  17   1   52.70   12.29
  17  14   1   54.38   11.33
 -17 -14   1   76.65   12.24
  17  14   1   56.11   10.10
 -13  17  -1    4.97    6.59
  17  13  -1   -3.04    6.36
 -13  17  -1    8.08    7.35
 -17 -13  -1   10.35    7.65
  17  13  -1    9.90    7.57
 -13  17   1    8.40    7.53
  17  13   1   18.59    7.71
 -13  17   1   -4.23    6.82
 -17 -13   1   11.41    7.60
  17  13   1   12.34    7.10
 -17 -12  -1   52.21   10.01
  17  12  -1   43.03    9.21
 -12  17  -1   55.89   10.15
 -12  17  -1   45.22    9.87
  17  12   1   49.35    8.49
 -12  17   1   46.28   10.14
 -17 -12   1   39.81    9.04
 -12  17   1   34.21   10.34
  17  12   1   59.18   10.81
  17  11  -1   27.43    8.22
 -11  17  -1   37.74    9.73
 -17 -11  -1   43.53    8.76
 -11  17  -1   30.72    9.10
 -17 -11   1   31.76    8.26
 -11  17   1   19.01    9.09
  17  11   1   25.63    6.97
  17  11   1   32.72    9.10
 -11  17   1   25.57    8.66
 -10  17  -1  114.56   13.30
  17  10  -1   92.45   11.02
 -10  17  -1   94.34   12.73
 -17 -10  -1   70.24   10.62
  17  10   1   97.48   10.93
  17  10   1   91.64   12.43
 -10  17   1   78.88   10.87
  10 -17   1  110.49   10.15
 -10  17   1   98.13   13.96
 -17 -10   1   86.58   11.56
   9 -17  -1   44.07    6.83
  -9  17  -1   38.30    9.40
 -17  -9  -1   53.30    9.74
  17   9  -1   67.38    9.94
  -9  17  -1   61.46   10.46
  17   9   1   54.52    8.70
  17   9   1   42.43    8.54
  -9  17   1   43.54   10.24
 -17  -9   1   51.77    9.32
  -9  17   1   53.08    9.47
   9 -17   1   51.87    7.81
  -8  17  -1  155.69   14.21
 -17  -8  -1  191.86   14.98
   8 -17  -1  189.43   12.09
  17   8  -1  152.26   13.92
  -8  17  -1  189.37   16.40
 -17  -8   1  183.65   14.41
  17   8   1  180.61   13.38
  -8  17   1  192.43   15.07
  -8  17   1  163.38   16.87
   8 -17   1  178.18   13.31
  -7  17  -1  473.48   26.21
   7 -17  -1  506.98   23.72
 -17  -7  -1  469.96   25.24
  17   7  -1  471.51   24.84
  -7  17  -1  478.78   26.81
  -7  17   1  461.82   27.31
 -17  -7   1  452.48   24.32
  -7  17   1  499.25   25.23
  17   7   1  430.34   23.65
   7 -17   1  480.27   23.92
  17   6  -1  120.80   11.79
  -6  17  -1  123.52   13.11
 -17  -6  -1  131.12   11.52
   6 -17  -1  112.14   10.23
  -6  17  -1  127.06   12.48
  -6  17   1  128.33   14.17
  -6  17   1  142.81   12.64
 -17  -6   1  102.65   10.99
   6 -17   1  156.04   12.18
 -17  -5  -1   71.50    9.68
   5 -17  -1   76.28    8.78
 -17  -5  -1   83.24   10.36
  -5  17  -1   84.42   10.27
  -5  17  -1   68.67   10.10
  -5  17   1   59.03    8.69
  -5  17   1   72.63   11.42
   5 -17   1   66.30    9.16
 -17  -5   1   74.04    8.93
 -17  -4  -1   67.60    9.92
  -4  17  -1   74.32    9.75
   4 -17  -1   70.44    8.84
 -17  -4  -1   79.12    9.27
  -4  17  -1   62.13    9.97
 -17  -4   1   72.64   10.95
 -17  -4   1   78.79    8.82
   4 -17   1   79.41   10.05
  -4  17   1   64.85    9.03
  -4  17   1   65.94   10.11
 -17  -3  -1   29.80    6.57
 -17  -3  -1   29.89    7.44
   3 -17  -1   30.01    6.99
  -3  17  -1   21.73    7.50
  -3  17  -1   17.54    6.97
 -17  -3   1   43.09    7.07
 -17  -3   1   24.91    9.78
  -3  17   1   28.15    7.05
   3 -17   1   46.55    8.59
  -3  17   1   42.12    9.64
 -17  -3   1   36.99    8.16
  -2  17  -1   51.22    8.87
 -17  -2  -1   60.66    8.06
 -17  -2  -1   61.27   11.60
  -2  17  -1   48.26    8.43
   2 -17  -1   54.79    8.02
 -17  -2  -1   55.25    9.31
 -17  -2   1   57.14   10.36
   2 -17   1   73.77   10.14
  -2  17   1   68.62    8.76
  -2  17   1   58.69   10.62
 -17  -2   1   65.49   12.74
 -17  -2   1   64.18    7.78
 -17  -1  -1   43.12   10.65
   1 -17  -1   27.65    7.71
 -17  -1  -1   26.60    6.01
  -1  17  -1   41.46    8.44
  -1  17  -1   22.81    7.49
 -17  -1  -1   43.97    8.10
  -1  17   1   46.98    9.73
  -1  17   1   39.07    7.04
 -17  -1   1   17.74    8.24
 -17  -1   1   30.82   10.82
 -17  -1   1   27.60    5.63
   1 -17   1   33.63    8.48
   0 -17  -1  276.47   17.43
 -17   0  -1  271.26   20.53
 -17   0  -1  296.15   18.52
   0  17  -1  286.83   19.03
   0  17  -1  251.55   16.87
 -17   0   1  265.93   18.42
   0 -17   1  275.77   18.41
 -17   0   1  320.68   22.56
 -17   0   1  283.65   15.45
   0  17   1  306.92   16.73
   0  17   1  317.45   20.63
 -17   1  -1  125.62   14.79
  -1 -17  -1  147.96   13.65
   1  17  -1  117.08   12.15
   1  17  -1  138.94   11.98
 -17   1  -1  103.71   12.01
  -1 -17   1  122.19   12.86
 -17   1   1  144.49    9.67
   1  17   1  133.88   13.93
  17  -1   1  145.46   10.59
 -17   1   1  104.46   12.58
 -17   1   1  148.23   16.57
   1  17   1  130.31   10.66
 -17   1   1  123.74   12.96
 -17   2  -1  206.11   15.62
   2  17  -1  221.85   14.80
  17  -2  -1  216.60   12.07
 -17   2  -1  235.16   19.06
   2  17  -1  223.40   16.26
  -2 -17  -1  193.46   16.01
  17  -2   1  193.10   12.93
 -17   2   1  227.75   16.53
   2  17   1  244.33   18.12
   2  17   1  228.31   13.90
 -17   2   1  208.45   19.60
 -17   2   1  207.41   15.83
  -2 -17   1  198.72   15.77
 -17   3  -1   25.88    9.61
  -3 -17  -1   17.11    8.03
 -17   3  -1    5.08    6.58
   3  17  -1    8.96    6.09
   3  17  -1   15.89    7.51
  17  -3  -1   16.96    6.48
 -17   3   1    7.47    6.83
  -3 -17   1   20.58    8.36
  17  -3   1   17.31    4.99
   3  17   1   25.81    8.44
 -17   3   1   19.98    8.11
 -17   3   1   10.75    8.86
   3  17   1   12.44    5.33
 -17   4  -1   49.04    8.00
   4  17  -1   52.77    9.69
 -17   4  -1   39.42    9.25
  -4 -17  -1   37.43    9.37
   4  17  -1   31.04    7.53
 -17   4  -1   53.22   10.66
 -17   4   1   33.66    8.51
 -17   4   1   52.54    9.33
 -17   4   1   48.61   11.00
  17  -4   1   65.49    7.46
   4  17   1   59.74    7.59
  -4 -17   1   35.86    9.67
   4  17   1   43.06    9.58
   5  17  -1   -2.16    6.09
  -5 -17  -1   10.34    7.06
   5  17  -1   -3.87    5.37
 -17   5  -1   -1.61    6.11
 -17   5  -1  -11.22    4.45
 -17   5   1    1.08    6.46
   5  17   1    0.25    4.97
 -17   5   1  -11.27    7.74
  17  -5   1   -8.24    3.59
   5  17   1    6.53    6.94
 -17   5   1    2.35    6.19
  -5 -17   1    4.69    7.67
 -17   6  -1   20.40    6.38
 -17   6  -1   31.13    8.84
  -6 -17  -1   22.42    8.22
   6  17  -1   27.79    7.78
   6  17  -1   33.16    7.57
   6  17   1   29.64    8.34
   6  17   1   30.52    6.20
 -17   6   1   25.47    7.59
  -6 -17   1   38.58    9.61
 -17   6   1   19.03    7.76
 -17   7  -1   -7.93    5.78
  -7 -17  -1    0.13    6.60
   7  17  -1   -2.57    5.75
 -17   7  -1    3.04    5.49
   7  17  -1    6.42    6.34
   7  17   1   -6.74    4.66
 -17   7   1  -11.53    5.31
  -7 -17   1    4.27    7.94
 -17   7   1   -1.26    6.54
   7  17   1    0.07    6.51
 -17   8  -1  146.81   12.36
   8  17  -1  133.04   12.56
 -17   8  -1  158.44   15.34
   8  17  -1  104.13   13.03
  -8 -17  -1  155.91   15.80
  -8 -17   1  127.65   14.46
   8  17   1  144.39   11.14
 -17   8   1  121.43   13.69
 -17   8   1  109.06   12.67
   8  17   1  126.48   14.72
   9  17  -1  161.78   13.78
  -9 -17  -1  197.88   16.26
 -17   9  -1  188.41   14.06
   9  17  -1  193.38   16.52
 -17   9  -1  174.37   15.49
  -9 -17   1  230.24   17.69
 -17   9   1  188.63   17.21
   9  17   1  209.47   18.50
   9  17   1  201.48   13.62
 -17   9   1  183.25   16.02
  10  17  -1   49.15    9.04
 -10 -17  -1   47.46   10.13
 -17  10  -1   48.95    8.28
  10  17  -1   74.37   11.71
 -17  10  -1   47.57   10.30
 -17  10   1   33.81    9.87
  10  17   1   52.95    7.70
 -17  10   1   45.83    9.88
 -10 -17   1   67.75   11.39
  10  17   1   49.08    9.98
 -11 -17  -1   81.14   12.35
  11  17  -1   83.54   12.51
 -17  11  -1   72.39    9.29
  11  17  -1   79.64   10.30
 -17  11  -1   66.61   12.16
  11  17   1   86.70    9.48
 -17  11   1   85.85   12.16
 -17  11   1   72.37   11.84
  11  17   1   70.14   12.47
 -11 -17   1   71.60   11.97
  12  17  -1   91.40   13.37
 -12 -17  -1   74.67   12.60
  12  17  -1   82.46   10.79
 -17  12  -1   67.59    9.70
 -17  12  -1   69.52   11.33
 -12 -17   1   81.26   12.74
 -17  12   1  126.16   14.72
 -17  12   1   86.84   12.24
  12  17   1   99.28   10.26
  12  17   1   80.98   13.13
  13  17  -1   13.73    8.56
 -13 -17  -1   11.43    9.75
  13  17  -1   11.28    7.61
 -17  13  -1   26.99    9.28
  13  17   1   17.92    9.31
 -17  13   1   24.51    8.89
 -13 -17   1   23.54    9.91
 -17  13   1   21.93    8.26
  14  17  -1   34.45    9.46
 -17  14  -1   43.42   10.12
 -14 -17  -1   41.69   10.38
  14  17  -1   61.10   11.90
 -14 -17   1   57.21   11.45
  14  17   1   64.53   12.20
 -17  14   1   60.86   11.08
 -17  14   1   67.18   11.64
 -15 -17  -1   25.78    9.40
  15  17  -1   27.16   10.49
 -17  15  -1   44.61   11.13
  15  17  -1   35.54    9.74
 -15 -17   1   30.60    9.63
  15  17   1   16.62    8.84
 -17  15   1   24.45    9.31
 -17  15   1   29.94   10.07
  16  17  -1   46.77   10.51
  16  17  -1   38.48   10.72
 -16 -17  -1   58.37   11.48
 -17  16  -1   39.61   10.21
  16  17   1   53.37   11.06
 -17  16   1   30.10    9.66
 -16 -17   1   50.21   11.85
 -17  16   1   42.35   10.58
  17  17  -1   14.86    9.12
  17  17  -1   13.28   10.49
 -17  17  -1   20.74    9.88
 -17 -17  -1   36.40   10.70
 -17 -17   1   10.54    8.86
  17  17   1    1.90    9.84
 -17  17   1   19.11    8.83
  18  17  -1   37.31   11.07
 -18 -17  -1   27.20   11.46
 -17  18  -1   50.78   11.11
  18  17  -1   31.36    9.72
 -17  18   1   35.50   10.36
 -18 -17   1   53.90   11.47
  18  17   1   20.91   10.06
 -16  18  -1  153.12   17.13
  18  16  -1  155.66   16.25
 -18 -16  -1  170.98   17.86
  18  16  -1  144.84   16.99
 -16  18   1  141.69   16.18
 -16  18   1  140.11   19.24
  18  16   1  168.75   18.28
 -18 -16   1  177.15   17.93
  18  15  -1   39.88   10.41
  18  15  -1   29.41   10.77
 -15  18  -1   26.06    9.36
 -18 -15  -1   42.59   10.88
 -18 -15   1   35.70   10.15
  18  15   1   45.70   12.15
 -15  18   1   39.84   11.40
 -15  18   1   49.05   10.98
 -14  18  -1  262.15   20.20
 -18 -14  -1  207.29   18.99
  18  14  -1  226.94   20.85
  18  14  -1  215.72   18.24
  18  14   1  228.34   17.31
 -14  18   1  218.63   20.31
 -14  18   1  253.01   19.58
  18  14   1  222.40   21.14
 -18 -14   1  242.40   19.71
  18  13  -1   66.11   11.65
 -13  18  -1   62.32   11.37
 -18 -13  -1   77.69   12.37
  18  13  -1   68.99   11.67
 -18 -13   1   69.87   11.12
 -13  18   1   69.94   11.67
  18  13   1   49.13    9.84
  18  13   1   67.89   12.46
 -13  18   1   76.90   13.45
 -18 -12  -1    6.26    6.76
  18  12  -1    3.85    6.79
 -12  18  -1    4.25    6.78
 -12  18  -1    7.79    7.76
  18  12   1    5.72    7.91
 -12  18   1   -6.36    7.65
 -18 -12   1    8.65    7.39
 -12  18   1   10.92    8.22
  18  12   1    4.80    6.65
 -18 -11  -1   50.71   10.34
 -11  18  -1   33.57    8.94
  18  11  -1   63.05   10.26
 -11  18  -1   51.47   10.43
 -18 -11   1   45.77   10.00
 -11  18   1   52.78   10.11
  18  11   1   37.45    8.39
  18  11   1   73.99   11.86
 -11  18   1   40.60   10.80
 -10  18  -1   -8.73    5.99
  18  10  -1   -5.12    5.04
 -18 -10  -1    5.59    6.36
 -10  18  -1   -6.07    6.61
  18  10   1  -11.08    6.58
  10 -18   1   -1.30    4.86
 -10  18   1  -14.14    5.16
 -18 -10   1   -6.13    6.09
 -10  18   1   -6.37    7.24
  18  10   1    1.14    6.17
  -9  18  -1  119.08   13.91
  18   9  -1   98.95   11.36
 -18  -9  -1  128.36   13.32
  -9  18  -1  111.99   12.78
  18   9   1  103.33   12.02
 -18  -9   1  106.58   12.39
   9 -18   1  104.29   10.46
  -9  18   1  110.65   14.81
  -9  18   1  104.05   12.56
  18   9   1  104.95   11.26
 -18  -8  -1    1.02    6.46
  -8  18  -1   11.59    6.90
   8 -18  -1   13.77    5.20
  18   8  -1   12.73    6.39
  -8  18  -1   11.12    7.15
  18   8   1    8.52    5.81
  -8  18   1    1.33    6.49
   8 -18   1    7.54    5.94
  -8  18   1    8.44    7.96
 -18  -8   1   22.09    6.42
   7 -18  -1  208.32   13.62
 -18  -7  -1  202.80   14.92
  -7  18  -1  201.56   16.93
  -7  18  -1  184.40   15.78
  18   7  -1  197.62   14.62
  -7  18   1  217.16   15.61
  18   7   1  191.17   14.34
 -18  -7   1  201.16   14.87
   7 -18   1  203.23   14.36
  -7  18   1  182.51   17.52
  18   6  -1  184.33   14.40
  -6  18  -1  167.70   14.75
   6 -18  -1  162.53   12.21
 -18  -6  -1  166.31   13.10
  -6  18  -1  148.91   15.38
  -6  18   1  189.03   14.59
 -18  -6   1  164.04   13.43
   6 -18   1  204.77   14.27
  -6  18   1  179.10   17.41
  -5  18  -1   51.53    9.85
 -18  -5  -1   47.35    8.37
   5 -18  -1   59.74    8.21
 -18  -5  -1   49.83    8.59
  -5  18  -1   63.84    9.96
   5 -18   1   54.24    9.00
  -5  18   1   47.35    8.32
 -18  -5   1   57.59    8.40
  -5  18   1   61.72   10.41
  -4  18  -1   89.19   11.67
  -4  18  -1  108.91   11.88
 -18  -4  -1  118.04   11.18
 -18  -4  -1   85.15   11.33
   4 -18  -1   91.88   10.18
 -18  -4   1   95.13   11.78
  -4  18   1  103.04   10.87
 -18  -4   1  101.73   10.31
   4 -18   1  134.69   12.56
  -4  18   1  102.29   13.11
   3 -18  -1   41.00    8.03
  -3  18  -1   42.07    8.54
 -18  -3  -1   48.02    8.76
  -3  18  -1   43.28    8.82
 -18  -3  -1   55.91    8.25
 -18  -3   1   37.18    8.32
  -3  18   1   41.58    9.53
 -18  -3   1   49.83    7.29
   3 -18   1   36.78    8.18
  -3  18   1   43.13    7.80
 -18  -2  -1   10.53    7.75
 -18  -2  -1   10.26    5.48
  -2  18  -1    9.58    6.54
 -18  -2  -1   15.11    7.47
   2 -18  -1   13.45    6.61
  -2  18  -1   10.62    6.82
  -2  18   1   14.23    5.87
 -18  -2   1   17.44    7.30
 -18  -2   1    5.26    5.03
  -2  18   1    8.93    6.85
   2 -18   1    8.67    6.18
 -18  -2   1   16.44   10.19
 -18  -1  -1  122.81   15.24
 -18  -1  -1  123.23   13.08
  -1  18  -1  120.34   12.22
   1 -18  -1  120.36   12.40
  -1  18  -1  129.25   13.35
 -18  -1  -1  127.64   11.29
   1 -18   1  100.01   11.72
 -18  -1   1  106.06    9.47
 -18  -1   1  120.07   15.64
  -1  18   1  116.98   10.92
 -18  -1   1   97.37   11.96
  -1  18   1  133.83   14.33
   0 -18  -1  155.78   13.20
 -18   0  -1  172.69   16.21
   0  18  -1  152.01   13.09
   0  18  -1  140.35   14.54
 -18   0  -1  157.57   15.02
 -18   0   1  149.20   10.48
   0 -18   1  170.20   14.18
 -18   0   1  162.72   17.79
 -18   0   1  132.07   13.92
   0  18   1  139.69   15.23
  18   0   1  162.94   11.16
   0  18   1  152.99   11.91
  -1 -18  -1   43.37    9.30
  18  -1  -1   51.30    6.29
   1  18  -1   52.59    9.92
 -18   1  -1   35.82    8.35
 -18   1  -1   52.66   10.70
   1  18  -1   58.44    8.88
   1  18   1   66.82   10.71
  -1 -18   1   30.72    8.38
 -18   1   1   47.66   11.00
  18  -1   1   47.98    6.81
   1  18   1   39.95    7.20
 -18   1   1   34.49    8.34
 -18   1   1   50.73    9.95
   2  18  -1   59.58   10.04
 -18   2  -1   38.92    8.70
 -18   2  -1   44.42   10.12
   2  18  -1   50.37    8.40
  -2 -18  -1   45.76    8.98
 -18   2   1   58.98    9.82
 -18   2   1   65.34   10.13
  18  -2   1   64.66    7.79
  -2 -18   1   47.38    9.86
   2  18   1   41.54    9.68
   2  18   1   53.21    7.87
 -18   2   1   60.26   12.66
  -3 -18  -1   59.49   10.09
   3  18  -1   83.08    9.87
 -18   3  -1   62.08   10.57
   3  18  -1   73.91   11.36
 -18   3  -1   58.46   12.48
   3  18   1   62.01   10.78
 -18   3   1   74.38   10.73
  18  -3   1   85.87    8.99
 -18   3   1   78.28   10.65
  -3 -18   1   67.79   10.90
   3  18   1   82.02    8.99
 -18   3   1  104.99   14.71
  -4 -18  -1   48.50    9.58
 -18   4  -1   54.87   11.26
 -18   4  -1   32.21    8.64
   4  18  -1   39.82    9.53
   4  18  -1   51.68    8.62
 -18   4   1   36.02    8.81
 -18   4   1   43.27    8.63
 -18   4   1   53.88   12.59
  18  -4   1   41.72    6.75
   4  18   1   49.90    7.37
   4  18   1   51.37   10.53
  -4 -18   1   43.64    9.31
   5  18  -1  182.58   14.38
   5  18  -1  157.75   15.19
 -18   5  -1  159.42   15.61
 -18   5  -1  186.60   14.13
  -5 -18  -1  182.16   15.39
 -18   5  -1  176.12   17.82
   5  18   1  175.50   12.25
 -18   5   1  146.53   14.39
  -5 -18   1  182.58   16.70
 -18   5   1  164.21   14.64
   5  18   1  130.91   14.50
 -18   5   1  154.61   17.18
   6  18  -1   29.06    8.42
   6  18  -1   40.89    8.11
  -6 -18  -1   39.98   10.50
 -18   6  -1   53.99    8.00
 -18   6  -1   36.58    9.44
 -18   6   1   44.89   10.46
   6  18   1   51.88   10.24
 -18   6   1   38.65    8.61
  -6 -18   1   35.67    9.30
   6  18   1   46.47    7.53
 -18   6   1   34.57   11.19
 -18   7  -1  116.71   11.18
  -7 -18  -1  113.06   13.46
 -18   7  -1   87.86   12.66
   7  18  -1  119.52   13.99
   7  18  -1  108.82   11.52
   7  18   1  104.57   13.68
 -18   7   1   92.67   11.78
  -7 -18   1  100.96   13.22
 -18   7   1  106.14   12.92
   7  18   1  111.58   10.38
  -8 -18  -1   33.95    9.10
 -18   8  -1   23.37    9.19
 -18   8  -1   30.86    7.19
   8  18  -1   32.26    7.85
   8  18  -1   29.54    8.64
 -18   8   1   22.69    8.39
 -18   8   1   24.55    8.31
   8  18   1   26.36    6.62
  -8 -18   1   43.38   10.11
   8  18   1   25.01    8.74
   9  18  -1   65.39    9.61
 -18   9  -1   68.18    9.00
  -9 -18  -1   66.53   11.32
   9  18  -1   58.95   11.72
 -18   9  -1   62.49   10.73
   9  18   1   43.39   10.55
 -18   9   1   53.33    9.73
   9  18   1   58.24    8.10
  -9 -18   1   54.13   11.26
 -18   9   1   44.11   10.92
 -18  10  -1    6.28    7.29
 -10 -18  -1   15.95    8.97
 -18  10  -1    4.95    5.55
  10  18  -1   -0.37    6.63
  10  18  -1   18.36    7.01
 -18  10   1    0.66    6.99
  10  18   1    4.22    5.39
 -18  10   1    4.59    7.37
 -10 -18   1    9.29    9.09
  10  18   1    3.74    8.72
 -11 -18  -1  105.22   13.58
  11  18  -1   88.42   10.82
  11  18  -1   99.89   14.24
 -18  11  -1   83.61   12.63
 -11 -18   1   79.54   12.67
  11  18   1   74.21   12.67
 -18  11   1   77.60   12.11
 -18  11   1   84.17   11.88
 -12 -18  -1   13.43    8.90
 -18  12  -1    8.36    8.03
  12  18  -1    4.95    6.91
  12  18  -1    5.69    7.52
 -18  12   1   -7.41    6.81
 -12 -18   1   10.63    8.60
 -18  12   1    0.95    7.29
  12  18   1    4.82    8.57
  13  18  -1   22.48    8.25
 -18  13  -1   10.32    8.73
 -13 -18  -1   20.14    9.38
  13  18  -1   14.83    8.48
  13  18   1   20.72    9.99
 -18  13   1    4.92    7.75
 -18  13   1   13.39    8.68
 -13 -18   1   11.34    9.43
  14  18  -1  122.88   13.57
  14  18  -1  113.79   14.91
 -14 -18  -1  123.32   15.34
 -18  14  -1   98.17   14.71
  14  18   1  111.92   14.88
 -18  14   1  125.84   15.45
 -18  14   1  115.47   14.12
 -14 -18   1   99.80   14.22
  15  18  -1   52.37   10.45
 -18  15  -1   27.86   10.73
  15  18  -1   67.33   12.18
 -15 -18  -1   52.41   11.55
  15  18   1   48.30   11.64
 -15 -18   1   48.21   11.05
 -18  15   1   55.28   11.72
 -18  15   1   44.33   10.77
  16  18  -1   44.76   11.12
  16  18  -1   50.47   10.36
 -18  16  -1   29.35   10.17
 -16 -18  -1   35.13   11.02
  16  18   1   38.29   11.12
 -16 -18   1   33.94   10.36
 -18  16   1   60.58   12.30
  17  18  -1   53.57   17.68
 -17 -18  -1   33.32   11.07
  17  18  -1   63.45   13.32
 -18  17  -1   45.88   12.54
  17  18   1   35.19   11.42
 -18  17   1   57.07   11.85
 -17 -18   1   59.44   13.25
 -16  19  -1   41.62   10.75
  19  16  -1   63.83   11.58
  19  16  -1   68.65   13.53
 -16  19   1   37.29   10.29
  19  16   1   48.16   11.96
 -15  19  -1  149.24   17.13
  19  15  -1  163.77   17.52
  19  15  -1  192.31   19.67
 -19 -15  -1  171.66   18.09
 -19 -15   1  172.56   17.46
 -15  19   1  131.50   17.08
 -15  19   1  156.01   16.87
  19  15   1  140.96   16.68
 -14  19  -1   34.82   10.55
  19  14  -1   22.82    9.39
 -19 -14  -1   29.26    9.66
  19  14  -1   38.50   11.42
 -14  19   1   18.50    9.98
 -19 -14   1   35.08   10.22
  19  14   1   26.43   10.81
 -14  19   1   33.19   10.31
 -19 -13  -1   24.93    9.14
  19  13  -1   28.71   10.15
 -13  19  -1   33.78   10.59
  19  13  -1   38.16    9.91
 -13  19   1   24.28    9.89
 -19 -13   1   28.56    9.84
 -13  19   1   36.63    9.96
  19  13   1   37.38   11.03
  19  13   1   39.28    9.33
  19  12  -1   75.02   11.29
  19  12  -1   53.71   10.90
 -12  19  -1   76.51   11.80
 -19 -12  -1   65.53   11.83
  19  12   1   73.76   12.65
 -12  19   1   68.21   13.48
  19  12   1   55.90    9.72
 -19 -12   1   84.57   12.41
 -12  19   1   79.96   12.23
 -11  19  -1   27.41    9.29
 -11  19  -1   37.11   10.04
  19  11  -1   36.68    9.33
 -19 -11  -1   43.15   10.09
  19  11   1   32.92    8.26
 -11  19   1   30.77    9.34
 -11  19   1   36.71   10.87
 -19 -11   1   29.98    8.17
  19  11   1   30.69    9.83
  19  10  -1   39.31    9.27
 -10  19  -1   44.27   10.13
 -10  19  -1   46.87   10.51
 -19 -10  -1   64.04   10.96
  19  10   1   51.31   10.36
 -19 -10   1   35.42    8.33
 -10  19   1   47.19   11.67
 -10  19   1   38.28    9.35
  19  10   1   32.53    8.29
  19   9  -1   29.64    8.59
  -9  19  -1   11.79    8.32
  -9  19  -1   47.89    9.52
 -19  -9  -1   25.72    8.38
  -9  19   1   39.66    8.45
  -9  19   1   28.61   10.40
   9 -19   1   42.68    7.73
  19   9   1   23.65    8.29
  19   9   1   29.60    7.73
 -19  -9   1   26.99    8.28
  -8  19  -1  103.37   13.36
  19   8  -1  102.43   11.96
  -8  19  -1   88.38   11.82
   8 -19  -1  102.61   10.40
 -19  -8  -1   94.35   12.12
  19   8   1   90.78   10.63
   8 -19   1  112.04   11.11
  -8  19   1   98.40   14.25
 -19  -8   1   95.70   10.81
  -8  19   1  104.28   12.30
  -7  19  -1   19.56    7.33
 -19  -7  -1    5.22    6.04
  19   7  -1    8.91    6.01
  -7  19  -1    6.98    7.46
   7 -19  -1   13.35    5.70
 -19  -7   1   -0.10    5.56
  -7  19   1   -0.25    7.21
  19   7   1   -1.25    5.35
  -7  19   1    9.00    6.60
   7 -19   1    7.65    6.24
   6 -19  -1  126.87   11.00
  -6  19  -1  114.87   13.74
 -19  -6  -1  100.71   11.53
  -6  19  -1  121.10   13.28
  19   6  -1  122.80   12.98
  -6  19   1  112.56   14.30
 -19  -6   1  123.20   11.84
  -6  19   1   98.38   11.57
   6 -19   1  113.16   11.77
  -5  19  -1   89.11   11.94
  -5  19  -1   99.56   11.87
 -19  -5  -1   83.11   11.27
 -19  -5  -1   80.79   10.17
  19   5  -1   95.16   11.50
   5 -19  -1  104.59   10.72
   5 -19   1   86.74   11.00
 -19  -5   1   95.71   10.50
  -5  19   1   93.04   13.25
  -5  19   1   98.32   11.03
   4 -19  -1   90.83   10.31
  -4  19  -1  104.07   11.71
  -4  19  -1   89.27   12.13
 -19  -4  -1   64.02    9.32
 -19  -4  -1   83.98   11.38
 -19  -4   1   82.80   11.55
  -4  19   1   89.59   12.76
 -19  -4   1   85.41    9.64
  -4  19   1   89.15   10.30
   4 -19   1  102.43   11.70
   3 -19  -1   96.54   11.01
  -3  19  -1   97.35   12.28
  -3  19  -1   78.63   10.76
 -19  -3  -1  108.94   10.85
 -19  -3  -1  102.95   11.91
  -3  19   1   99.31   10.95
   3 -19   1   80.94   10.50
  -3  19   1   80.20   12.38
 -19  -3   1  112.49   12.64
 -19  -3   1  104.69   10.18
 -19  -2  -1   44.11   10.58
 -19  -2  -1   34.80    8.85
  -2  19  -1   53.21    9.74
 -19  -2  -1   24.56    6.53
  -2  19  -1   31.90    8.13
   2 -19  -1   46.07    8.50
 -19  -2   1   44.65   11.52
  -2  19   1   46.68    7.87
 -19  -2   1   30.89    9.28
   2 -19   1   37.36    9.04
 -19  -2   1   34.58    6.60
  -2  19   1   44.58   10.12
  -1  19  -1  135.24   13.88
  -1  19  -1  146.97   13.60
 -19  -1  -1  115.99   13.06
   1 -19  -1  153.24   13.43
 -19  -1  -1  130.04   16.25
 -19  -1  -1  129.71   11.71
 -19  -1   1  167.11   14.56
 -19  -1   1  140.52   17.44
 -19  -1   1  143.50   11.08
  -1  19   1  129.41   11.82
   1 -19   1  125.09   13.52
  -1  19   1  140.25   15.55
 -19   0  -1   73.21   10.99
   0  19  -1   53.20    9.07
   0 -19  -1   50.02    8.83
   0  19  -1   44.85    9.39
 -19   0  -1   60.65   12.46
 -19   0   1   43.92    9.09
 -19   0   1   58.95   12.40
   0  19   1   44.68   10.31
   0  19   1   51.09    8.34
   0 -19   1   75.45   10.68
 -19   0   1   52.05    7.01
  19   0   1   61.35    8.00
 -19   1  -1   42.40    9.00
   1  19  -1   26.07    8.76
  -1 -19  -1   30.65    8.53
   1  19  -1   31.59    7.95
 -19   1  -1   47.35   10.84
  -1 -19   1   36.90    8.73
 -19   1   1   16.83    8.06
  19  -1   1   53.70    7.33
   1  19   1   43.22    9.38
 -19   1   1   38.18   12.07
   1  19   1   39.78    7.52
 -19   2  -1  167.60   17.79
   2  19  -1  176.95   13.84
  -2 -19  -1  172.01   14.75
 -19   2  -1  169.57   15.98
   2  19  -1  140.36   14.95
  19  -2   1  152.94   11.77
   2  19   1  152.88   12.06
   2  19   1  190.67   16.61
 -19   2   1  174.70   16.18
 -19   2   1  198.88   19.80
 -19   2   1  170.70   15.58
  -2 -19   1  160.22   15.85
   3  19  -1   -0.11    6.20
  -3 -19  -1    7.29    7.05
   3  19  -1   12.52    6.60
 -19   3  -1    1.45    8.02
 -19   3  -1    2.83    6.73
 -19   3   1    2.65    7.07
   3  19   1   16.87    8.09
  19  -3   1   11.60    6.10
 -19   3   1   10.51    6.80
 -19   3   1   15.32    9.88
  -3 -19   1   17.77    7.88
   3  19   1   21.92    6.42
 -19   4  -1  121.53   15.59
 -19   4  -1  134.80   14.23
   4  19  -1  152.23   15.69
  -4 -19  -1  157.95   15.84
   4  19  -1  134.14   12.81
 -19   4   1  116.02   13.59
  -4 -19   1  141.04   14.62
 -19   4   1  133.86   16.42
 -19   4   1  139.30   13.68
   4  19   1  152.08   16.44
   4  19   1  139.35   11.57
 -19   5  -1  402.68   23.75
 -19   5  -1  379.82   21.95
   5  19  -1  368.37   21.47
  -5 -19  -1  370.50   24.25
 -19   5  -1  413.79   26.65
   5  19  -1  366.01   23.61
   5  19   1  464.60   26.60
   5  19   1  399.91   20.92
 -19   5   1  384.87   26.21
 -19   5   1  373.17   23.78
  -5 -19   1  432.02   25.09
 -19   5   1  353.73   23.25
   6  19  -1   91.42   11.17
 -19   6  -1   98.39   14.63
  -6 -19  -1  106.44   13.24
   6  19  -1   89.76   12.28
 -19   6  -1  112.40   11.22
 -19   6  -1  112.26   13.95
   6  19   1  120.99   10.70
   6  19   1   89.94   13.76
 -19   6   1   83.39   12.19
 -19   6   1   96.74   14.99
  -6 -19   1   95.94   13.79
 -19   6   1  111.62   12.65
  -7 -19  -1  192.83   17.09
   7  19  -1  206.20   18.92
   7  19  -1  215.89   15.64
 -19   7  -1  187.40   17.81
 -19   7  -1  202.31   15.05
 -19   7   1  199.69   17.24
   7  19   1  185.50   17.77
 -19   7   1  224.94   20.25
 -19   7   1  208.50   18.03
  -7 -19   1  197.33   17.36
   7  19   1  201.82   14.01
  -8 -19  -1  105.29   13.81
   8  19  -1  140.89   15.41
 -19   8  -1  122.71   11.92
 -19   8  -1  108.86   14.05
   8  19  -1  130.34   12.54
   8  19   1   98.95   13.52
   8  19   1  124.64   11.01
  -8 -19   1  103.42   13.78
 -19   8   1  124.51   14.16
 -19   8   1  124.34   13.46
 -19   9  -1   10.91    8.09
   9  19  -1   21.00    7.12
   9  19  -1   26.65    9.59
  -9 -19  -1   18.47    8.43
 -19   9  -1   24.38    6.78
 -19   9   1    1.49    6.97
  -9 -19   1   17.25    8.84
   9  19   1   23.44    8.38
 -19   9   1   19.97    7.85
  10  19  -1   28.92    7.87
 -10 -19  -1   33.03    9.63
  10  19  -1   27.42    8.95
 -19  10  -1   25.08    9.04
 -10 -19   1   27.89    9.62
 -19  10   1   29.34    9.04
  10  19   1   30.31   10.47
 -19  10   1   34.58    8.83
  11  19  -1   -0.78    7.53
 -11 -19  -1   10.76    8.69
 -19  11  -1    1.54    7.34
  11  19  -1    2.49    6.54
 -19  11   1    4.44    6.62
 -11 -19   1   -0.06    8.31
 -19  11   1   -7.77    7.82
  11  19   1   -3.21    7.29
 -19  12  -1   13.82    8.51
  12  19  -1   20.10    7.99
 -12 -19  -1   16.26    8.82
  12  19  -1   21.96    8.91
  12  19   1   36.04   10.39
 -12 -19   1   26.86    9.94
 -19  12   1   23.22    8.84
 -19  12   1   18.91    8.81
 -19  13  -1   81.45   13.13
 -13 -19  -1  142.66   16.94
  13  19  -1  112.87   12.83
  13  19  -1  102.28   15.17
  13  19   1  136.95   16.19
 -13 -19   1  122.96   16.20
 -19  13   1  120.39   14.29
 -19  13   1  105.81   14.90
 -19  14  -1   73.43   13.21
  14  19  -1  105.49   14.53
 -14 -19  -1   96.12   14.77
  14  19  -1   73.26   11.30
 -19  14   1   77.18   14.66
 -14 -19   1   72.92   13.19
 -19  14   1   97.82   13.66
  14  19   1   49.80   12.20
  15  19  -1   39.31   11.04
  15  19  -1   50.30   11.81
 -19  15  -1   61.83   13.14
 -15 -19  -1   74.04   13.24
 -15 -19   1   35.12   11.11
 -19  15   1   57.11   11.88
  15  19   1   53.08   12.90
 -19  16  -1   16.44    9.63
  16  19  -1   54.36   11.84
  16  19   1   28.40   11.51
 -19  16   1   33.90   10.38
  20  14  -1   28.08    9.89
  20  14  -1   33.07   10.68
 -20 -14  -1   37.33   11.18
 -14  20  -1   37.38   10.23
  20  14   1   37.55   11.67
 -20 -14   1   36.63    9.98
 -14  20   1   12.91    9.91
 -14  20   1   37.43   10.49
 -13  20  -1   44.49   10.52
  20  13  -1   28.50    9.75
 -20 -13  -1   51.44   10.52
  20  13  -1   57.73   12.21
 -20 -13   1   29.45    9.83
 -13  20   1   39.99   10.39
 -13  20   1   17.68   10.45
  20  13   1   36.88    9.49
  20  13   1   47.42   11.73
  20  12  -1   54.29   11.91
 -12  20  -1   61.76   12.05
 -20 -12  -1   62.89   11.92
  20  12  -1   71.82   11.66
 -12  20   1   78.43   11.67
 -20 -12   1   64.90   10.80
 -12  20   1   83.89   14.23
  20  12   1   68.81   10.90
  20  12   1   66.35   11.55
  20  11  -1   40.00    9.44
 -11  20  -1   21.53    8.52
 -20 -11  -1   29.52    9.52
 -11  20  -1    5.99    9.04
  20  11   1   14.69    8.43
 -11  20   1   27.30   10.55
  20  11   1   23.43    8.13
 -11  20   1   27.43    8.32
 -20 -11   1   30.74    9.20
  20  10  -1   85.67   11.66
 -10  20  -1  110.69   13.99
 -20 -10  -1  124.83   14.40
 -10  20  -1  113.67   14.69
 -10  20   1  109.29   15.42
  20  10   1  103.90   13.85
  20  10   1  133.26   13.80
 -10  20   1  112.80   13.67
 -20 -10   1  133.04   14.29
  20   9  -1  121.66   13.73
  -9  20  -1  120.83   14.98
  -9  20  -1  108.52   13.36
 -20  -9  -1  118.90   13.46
   9 -20   1  156.85   15.24
  -9  20   1  110.76   15.69
  -9  20   1  159.34   15.20
  20   9   1  135.59   13.36
  20   9   1  133.65   14.64
 -20  -9   1  115.90   12.95
  20   8  -1   -0.05    5.72
  -8  20  -1   -8.84    6.46
  -8  20  -1   -6.22    6.77
 -20  -8  -1   -3.82    6.75
 -20  -8   1    2.36    6.07
  -8  20   1   10.86    7.28
   8 -20   1    9.83    5.82
  -8  20   1    4.39    8.35
  20   8   1    2.29    5.97
 -20  -7  -1   55.07    9.67
  20   7  -1   89.59   11.57
  -7  20  -1   89.76   11.86
   7 -20  -1   82.77    9.46
  -7  20  -1   86.56   12.52
  -7  20   1   77.82   10.99
  -7  20   1   88.47   14.14
 -20  -7   1   90.67   11.28
   7 -20   1   90.95   10.85
  20   7   1  102.64   11.78
 -20  -6  -1    7.93    6.68
  20   6  -1    5.10    6.47
  -6  20  -1   -5.59    6.50
   6 -20  -1    1.77    5.03
  -6  20  -1   15.18    7.68
  -6  20   1    4.24    8.66
 -20  -6   1   -0.84    5.54
   6 -20   1    6.60    6.43
  -6  20   1    2.11    6.22
   5 -20  -1   40.32    7.64
  20   5  -1   37.78    8.68
 -20  -5  -1   56.60    9.19
  -5  20  -1   46.19    9.43
 -20  -5  -1   48.65    9.92
  -5  20  -1   44.92   10.01
 -20  -5   1   46.46    8.17
  -5  20   1   33.97    8.57
   5 -20   1   39.66    8.70
  -5  20   1   44.49   10.99
  -4  20  -1   91.47   12.55
 -20  -4  -1  103.01   11.23
  -4  20  -1   90.61   11.77
 -20  -4  -1   75.65   11.09
   4 -20  -1   92.26   10.82
  -4  20   1  103.22   11.51
   4 -20   1  122.20   12.93
  -4  20   1   87.64   13.11
 -20  -4   1   98.71   10.46
   3 -20  -1  123.47   12.48
 -20  -3  -1  122.18   13.53
  -3  20  -1  121.96   13.32
 -20  -3  -1  114.82   11.61
  -3  20  -1  113.93   13.51
   3 -20   1  137.32   13.84
 -20  -3   1  136.09   14.77
  -3  20   1  141.35   15.86
  -3  20   1  114.68   11.87
 -20  -3   1  118.02   11.23
   2 -20  -1  256.21   17.89
 -20  -2  -1  270.62   18.69
 -20  -2  -1  258.21   21.15
 -20  -2  -1  252.21   16.81
  -2  20  -1  271.94   17.52
  -2  20  -1  256.85   19.77
  -2  20   1  259.84   20.99
 -20  -2   1  251.15   21.96
   2 -20   1  270.76   18.33
 -20  -2   1  262.95   19.06
  -2  20   1  274.89   17.14
 -20  -2   1  261.50   15.91
 -20  -1  -1   78.73   13.02
   1 -20  -1   64.99   10.27
 -20  -1  -1   67.53   11.08
  -1  20  -1   64.74   10.84
  -1  20  -1   59.60    9.81
  20   1   1   82.17    9.40
 -20  -1   1   56.41   10.49
 -20  -1   1   94.78   15.39
  -1  20   1   73.03   12.13
  -1  20   1   72.55    9.44
 -20  -1   1   58.21    8.02
   1 -20   1   92.93   12.06
 -20   0  -1   58.52   12.31
   0 -20  -1   31.41    8.66
   0  20  -1   18.33    8.80
 -20   0  -1   29.11    8.47
   0  20  -1   36.82    8.27
 -20   0   1   18.80    8.09
   0  20   1   24.91    7.14
  20   0   1   39.71    6.98
   0  20   1   18.65    8.53
   0 -20   1   23.75    9.15
 -20   0   1   40.62   12.81
 -20   1  -1   50.36   11.18
   1  20  -1   30.88    8.93
   1  20  -1   27.33    7.50
  -1 -20  -1   20.20    8.54
 -20   1  -1   18.79    8.13
  -1 -20   1   19.56    7.89
   1  20   1   30.44    7.13
   1  20   1   21.00    9.27
 -20   1   1   27.50    8.69
 -20   1   1   19.47   11.04
  20  -1   1   35.86    7.01
 -20   2  -1    3.53    9.34
   2  20  -1    5.38    7.34
  -2 -20  -1   12.12    7.47
   2  20  -1   11.44    6.88
 -20   2  -1   -1.08    7.46
 -20   2   1    9.53   10.35
   2  20   1    2.58    8.09
   2  20   1    2.35    5.37
  -2 -20   1    5.09    6.78
 -20   2   1   13.44    7.88
 -20   3  -1  173.99   18.82
  -3 -20  -1  156.83   15.67
   3  20  -1  151.05   15.65
 -20   3  -1  142.64   15.62
   3  20  -1  144.42   13.82
 -20   3   1  143.00   14.40
  -3 -20   1  114.28   14.38
 -20   3   1  137.73   14.73
 -20   3   1  129.80   16.75
   3  20   1  128.99   14.97
   3  20   1  142.10   11.40
   4  20  -1  165.91   14.29
 -20   4  -1  157.81   17.47
   4  20  -1  115.15   14.02
 -20   4  -1  163.92   16.28
  -4 -20  -1  162.66   16.20
 -20   4   1  164.14   15.36
  -4 -20   1  154.15   16.50
   4  20   1  150.58   12.42
 -20   4   1  166.69   16.33
   4  20   1  177.41   18.01
 -20   4   1  147.88   18.52
   5  20  -1   96.52   12.91
   5  20  -1  112.42   12.09
 -20   5  -1  105.23   13.64
  -5 -20  -1   83.27   12.81
 -20   5  -1   90.93   15.41
 -20   5   1  104.03   12.54
   5  20   1  125.07   10.91
 -20   5   1   80.06   15.49
   5  20   1   94.05   14.16
  -5 -20   1   73.81   12.22
 -20   5   1   93.41   12.94
 -20   6  -1  453.77   24.68
  -6 -20  -1  425.93   26.59
   6  20  -1  471.32   25.00
 -20   6  -1  438.73   29.38
   6  20  -1  446.25   27.10
 -20   6  -1  458.43   27.47
  -6 -20   1  513.12   29.22
   6  20   1  459.77   28.16
 -20   6   1  448.14   27.28
 -20   6   1  496.53   27.48
   6  20   1  459.37   23.72
 -20   6   1  451.66   30.80
  -7 -20  -1   56.65   10.99
   7  20  -1   60.85   12.03
   7  20  -1   80.61   10.46
 -20   7  -1   80.64   15.08
 -20   7  -1   74.82    9.77
 -20   7  -1   88.74   12.81
 -20   7   1   65.65   13.59
 -20   7   1   89.00   11.69
   7  20   1   75.77   13.22
 -20   7   1   65.75   11.60
  -7 -20   1   43.28   10.89
 -20   8  -1   31.02   10.25
 -20   8  -1   35.28    8.66
  -8 -20  -1   17.32    9.95
   8  20  -1   35.35   10.27
   8  20  -1   14.28    7.10
 -20   8   1   15.69   11.14
 -20   8   1   32.45    9.63
   8  20   1   28.22   10.33
 -20   8   1   24.87    8.22
  -8 -20   1   41.50   10.23
   9  20  -1   60.22   11.88
  -9 -20  -1   60.60   11.53
   9  20  -1   63.32    9.75
 -20   9  -1   37.68    9.95
   9  20   1   60.49   12.60
 -20   9   1   61.68   10.44
  -9 -20   1   43.80   11.47
 -20   9   1   62.33   11.91
  10  20  -1   10.38    8.96
 -10 -20  -1   25.11    9.35
  10  20  -1   17.65    7.66
 -20  10  -1   26.95    9.10
 -20  10   1   10.18    7.15
 -20  10   1   13.19    8.45
 -10 -20   1   19.29   10.74
  10  20   1   12.49    8.37
  11  20  -1   26.99    8.55
  11  20  -1   41.52   10.50
 -20  11  -1   50.22   11.21
 -11 -20  -1   28.88    9.85
 -11 -20   1   61.07   12.72
  11  20   1   28.17   10.78
 -20  11   1   27.54    8.72
 -20  11   1   32.32    9.92
 -12 -20  -1   15.34   10.03
 -20  12  -1   20.89    8.69
  12  20  -1   37.13    8.72
  12  20  -1   26.27   10.32
 -12 -20   1   22.35   10.87
 -20  12   1   23.17   10.07
 -20  12   1   19.63    8.30
  12  20   1   28.77   10.87
  13  20  -1   28.15    9.79
 -13 -20  -1   39.59   11.16
 -20  13  -1   52.85   11.02
  13  20  -1   41.33   12.10
 -13 -20   1   50.35   12.57
 -20  13   1   36.98   10.65
  13  20   1   32.31   10.91
 -14 -20  -1   86.92   14.10
  14  20  -1   83.39   14.35
 -20  14  -1  110.78   15.32
 -20  14   1  127.23   16.37
 -14 -20   1   94.43   14.81
  14  20   1   91.76   15.69
  21  13  -1   14.44    9.60
  21  13  -1    0.74    7.70
 -21 -13  -1    7.51    9.01
 -13  21  -1    3.01    8.62
 -13  21   1   10.31    8.81
 -13  21   1    6.68    9.36
 -21 -13   1   26.16    9.47
  21  13   1   -2.94    8.02
 -12  21  -1  101.45   14.07
  21  12  -1   73.33   13.14
  21  12  -1   88.75   12.66
 -21 -12  -1   97.65   13.98
  21  12   1   71.68   11.65
  21  12   1   80.90   13.42
 -21 -12   1   74.47   12.37
 -12  21   1   79.42   14.67
 -12  21   1   86.72   13.12
 -21 -11  -1  201.71   18.00
  21  11  -1  190.60   17.31
 -11  21  -1  230.28   18.11
  21  11   1  215.57   20.06
 -11  21   1  215.39   17.94
  21  11   1  172.99   16.72
 -21 -11   1  206.93   17.61
 -11  21   1  198.00   20.94
  21  10  -1   50.76    9.99
 -10  21  -1   41.22   10.73
 -21 -10  -1   43.17    9.98
 -10  21  -1   36.47   10.83
  21  10   1   53.78   10.88
 -10  21   1   41.43   10.03
 -21 -10   1   35.96    9.11
 -10  21   1   32.04   11.40
  21  10   1   25.58    8.33
 -21  -9  -1   71.68   11.76
  -9  21  -1   45.57   11.45
  21   9  -1   88.80   12.23
  -9  21  -1   81.28   11.99
  21   9   1   53.36   10.08
  21   9   1   54.38    9.41
 -21  -9   1   50.07    9.56
  -9  21   1   63.02   13.23
  -9  21   1   73.37   11.33
 -21  -8  -1   34.54    8.96
  -8  21  -1   37.80   10.07
  -8  21  -1   46.08   10.94
  21   8  -1   41.43    9.22
  -8  21   1   25.19   10.74
 -21  -8   1   39.92    8.78
   8 -21   1   22.65    7.29
  -8  21   1   36.52    9.02
  21   8   1   30.54    8.16
 -21  -7  -1    1.21    6.79
  -7  21  -1   -3.99    7.47
  21   7  -1    1.42    5.89
   7 -21  -1    6.24    6.50
  -7  21  -1   -9.07    6.41
 -21  -7   1    0.56    6.19
  21   7   1    8.72    6.48
  -7  21   1   -3.21    6.13
  -7  21   1   -1.22    7.85
   7 -21   1    1.72    6.19
  -6  21  -1  104.87   14.01
   6 -21  -1  111.14   11.72
 -21  -6  -1  101.71   12.05
  -6  21  -1   87.70   11.65
  21   6  -1  121.61   12.65
  21   6   1  109.37   12.55
  -6  21   1   93.24   14.55
  -6  21   1   96.51   12.13
 -21  -6   1  112.85   11.89
   6 -21   1  109.85   12.27
   5 -21  -1   31.11    7.49
  21   5  -1   15.93    7.77
 -21  -5  -1   33.29    7.96
  -5  21  -1   18.89    8.25
  -5  21  -1   22.81    8.97
  -5  21   1   21.25    7.31
  -5  21   1   24.97    9.99
 -21  -5   1   11.75    6.34
   5 -21   1   15.40    7.44
 -21  -4  -1   62.93    9.59
   4 -21  -1   73.81   10.12
  -4  21  -1   61.27   10.19
  -4  21  -1   59.18   11.35
 -21  -4  -1   46.63    9.65
  -4  21   1   53.78   11.74
   4 -21   1   60.84   10.35
  -4  21   1   62.69    9.64
 -21  -4   1   52.71    8.42
  -3  21  -1  231.09   18.96
 -21  -3  -1  219.58   17.49
  -3  21  -1  216.36   17.04
 -21  -3  -1  216.81   16.07
   3 -21  -1  245.75   17.11
  -3  21   1  249.24   20.69
 -21  -3   1  240.89   18.28
 -21  -3   1  211.32   14.46
  -3  21   1  227.89   15.98
   3 -21   1  209.19   17.11
  -2  21  -1   68.35   11.68
 -21  -2  -1   70.94   13.13
  -2  21  -1   54.29    9.79
 -21  -2  -1   52.38    9.15
   2 -21  -1   50.30    9.66
 -21  -2  -1   81.00   12.32
 -21  -2   1   88.09   16.04
  -2  21   1   77.07   12.89
 -21  -2   1   84.24   11.90
  -2  21   1   72.01    9.90
   2 -21   1   80.73   11.59
 -21  -1  -1  103.18   13.25
  -1  21  -1  121.86   13.17
 -21  -1  -1  133.87   17.48
   1 -21  -1  122.57   13.62
  -1  21  -1  115.34   14.63
  -1  21   1  121.36   15.06
   1 -21   1  114.58   13.19
 -21  -1   1  100.28   13.51
 -21  -1   1  113.35   17.21
  -1  21   1  123.40   12.05
  21   1   1  128.01   11.26
 -21   0  -1   65.96   13.30
 -21   0  -1   78.50   11.55
   0  21  -1   77.37   10.76
   0  21  -1   73.63   12.38
   0 -21  -1   77.22   11.64
   0 -21   1  105.99   13.23
   0  21   1   83.45   13.44
 -21   0   1   88.99   12.61
   0  21   1   83.61   10.05
  21   0   1   84.70   11.64
 -21   0   1   78.21   14.53
   1  21  -1   38.74    8.99
 -21   1  -1   30.97    9.38
 -21   1  -1   23.39    9.89
  -1 -21  -1   46.21    9.97
   1  21  -1   17.19    7.48
 -21   1   1   54.18   12.74
   1  21   1   41.95    7.82
   1  21   1   17.21    9.09
  -1 -21   1   20.47    7.98
 -21   1   1   22.98    9.38
  -2 -21  -1   47.71    9.83
   2  21  -1   49.26   10.07
 -21   2  -1   34.20   10.93
   2  21  -1   49.17    9.13
 -21   2  -1   51.48   10.17
 -21   2   1   28.06   10.06
  -2 -21   1   44.77    9.54
   2  21   1   44.66    8.04
 -21   2   1   69.21   14.53
   2  21   1   52.16   11.94
 -21   3  -1   11.08    9.76
   3  21  -1  -11.99    6.66
   3  21  -1  -12.50    5.87
 -21   3  -1   -0.72    7.58
  -3 -21  -1   17.61    8.72
  -3 -21   1    0.60    7.06
   3  21   1    6.92    5.92
 -21   3   1    3.96    8.49
   3  21   1   -6.63    6.61
 -21   3   1    1.93   10.22
   4  21  -1   50.00    9.25
 -21   4  -1   60.03   13.77
  -4 -21  -1   66.16   11.19
   4  21  -1   56.07   11.29
 -21   4  -1   66.10   11.43
 -21   4   1   56.24   10.21
  -4 -21   1   54.62   11.10
   4  21   1   44.96    8.05
 -21   4   1   43.76   12.59
   4  21   1   35.47   11.07
 -21   4   1   65.48   12.09
   5  21  -1  301.09   23.00
   5  21  -1  322.66   19.59
  -5 -21  -1  295.20   21.56
 -21   5  -1  312.17   21.70
 -21   5  -1  313.64   25.27
 -21   5   1  277.88   23.50
  -5 -21   1  298.33   22.32
   5  21   1  278.39   23.13
 -21   5   1  272.62   20.57
 -21   5   1  310.47   20.51
 -21   6  -1  147.19   16.22
 -21   6  -1  157.79   19.47
   6  21  -1  148.89   16.46
  -6 -21  -1  154.78   16.39
   6  21  -1  161.41   14.56
   6  21   1  157.42   17.12
 -21   6   1  137.61   15.67
 -21   6   1  161.37   15.49
  -6 -21   1  152.11   16.43
 -21   6   1  130.76   18.82
  -7 -21  -1  216.87   17.96
   7  21  -1  194.11   19.51
 -21   7  -1  185.50   20.10
 -21   7  -1  171.43   17.70
   7  21  -1  199.71   15.37
 -21   7   1  209.87   17.03
 -21   7   1  161.77   19.37
   7  21   1  198.51   18.27
  -7 -21   1  201.40   17.78
 -21   7   1  145.74   16.55
   8  21  -1   45.80   11.61
   8  21  -1   25.88    8.08
 -21   8  -1   36.72   13.26
 -21   8  -1   42.67   10.97
  -8 -21  -1   42.71   10.59
 -21   8   1   40.31    9.44
 -21   8   1   40.91   10.37
 -21   8   1   27.97   11.79
  -8 -21   1   23.50    9.66
   8  21   1   25.20    9.52
 -21   9  -1   -3.15    7.08
  -9 -21  -1   11.32    8.61
   9  21  -1    7.83    7.20
   9  21  -1    0.86    7.61
 -21   9   1    1.74    6.83
  -9 -21   1   -8.28    8.43
 -21   9   1   -1.62    7.12
   9  21   1    6.38    8.34
 -21   9   1    8.76   11.57
  10  21  -1   32.42   11.07
 -21  10  -1   26.30    9.31
 -10 -21  -1   35.62   11.12
  10  21  -1   22.26    7.81
 -10 -21   1   31.42   11.12
  10  21   1   45.77   12.30
 -21  10   1   34.90    9.12
 -21  10   1   57.69   12.32
  11  21  -1   27.69   10.38
 -11 -21  -1   23.79    9.95
 -21  11  -1   18.03    9.12
  11  21  -1   17.79    8.24
 -21  11   1   20.79   10.46
 -21  11   1   11.63    8.27
 -11 -21   1   16.73   10.05
  11  21   1   18.89   10.58
  12  21  -1   25.64   11.12
 -21  12  -1   19.11    9.17
 -12 -21  -1   25.99   11.35
 -21  12   1   23.72    9.80
  12  21   1    1.36    9.59
 -12 -21   1    9.76    9.14
  13  21  -1   45.32   12.95
 -13 -21  -1   57.91   12.42
 -21  13  -1   54.45   11.64
  13  21   1   56.19   13.40
 -21  13   1   50.92   12.24
 -13 -21   1   53.80   12.21
  22  11  -1   60.04   11.53
 -22 -11  -1   78.95   12.74
 -11  22  -1   55.09   11.70
  22  11   1   65.57   12.72
 -11  22   1   66.52   11.92
  22  11   1   57.54   10.69
 -22 -11   1   68.47   11.92
 -11  22   1   84.97   14.99
  22  10  -1  108.07   13.71
 -10  22  -1   91.82   13.35
 -22 -10  -1  116.43   14.32
 -22 -10   1  109.01   13.83
 -10  22   1   97.52   15.82
  22  10   1   92.65   12.70
  22  10   1  142.23   16.09
 -10  22   1  125.30   14.56
 -22  -9  -1   54.80   11.09
  -9  22  -1   74.61   12.42
  -9  22  -1   64.98   12.29
  22   9  -1   50.18   10.07
  22   9   1   53.56   10.37
  -9  22   1   64.96   13.88
  22   9   1   68.32   10.67
  -9  22   1   57.97   11.09
 -22  -9   1   63.01   11.14
 -22  -8  -1   46.27    9.93
  -8  22  -1   17.81    9.70
  22   8  -1   29.80    9.04
  -8  22  -1   38.58    9.75
  -8  22   1   49.94    9.88
  22   8   1   41.51    9.01
  -8  22   1   44.90   12.49
 -22  -8   1   10.51    7.43
  22   7  -1   32.11    8.21
 -22  -7  -1   16.45    7.87
  -7  22  -1   24.19    9.01
  -7  22  -1   17.21    9.26
  -7  22   1   23.69    8.17
  -7  22   1   23.83   10.03
  22   7   1   36.60    8.61
   7 -22   1   24.19    7.96
 -22  -7   1   17.80    7.40
  -6  22  -1   -5.25    7.73
 -22  -6  -1   -8.89    6.16
  22   6  -1    1.97    5.90
   6 -22  -1   -3.09    6.12
  -6  22  -1   -2.58    5.90
 -22  -6   1    5.23    6.18
  -6  22   1    8.16    6.82
  -6  22   1   -4.20    8.86
  22   6   1   -4.10    4.94
   6 -22   1    1.91    7.07
  22   5  -1   71.33   10.97
 -22  -5  -1   69.71   10.62
  -5  22  -1   74.10   12.42
  -5  22  -1   68.33   11.43
   5 -22  -1   76.07   10.45
  -5  22   1   52.68   12.08
  -5  22   1   83.69   11.16
   5 -22   1   74.15   11.17
 -22  -5   1   71.22    9.78
 -22  -4  -1   52.65   10.77
   4 -22  -1   61.45   10.10
  -4  22  -1   55.10   11.23
 -22  -4  -1   54.05    9.28
  -4  22  -1   54.79   10.39
   4 -22   1   46.29    9.42
 -22  -4   1   39.56    8.23
  -4  22   1   46.14   11.07
  -4  22   1   61.14    9.85
  -3  22  -1  100.41   12.62
 -22  -3  -1  114.00   12.21
 -22  -3  -1  105.32   13.54
   3 -22  -1  109.15   12.69
  -3  22  -1  116.12   14.99
  -3  22   1   97.25   13.95
   3 -22   1   86.50   12.02
  -3  22   1  105.76   11.96
 -22  -3   1  122.27   14.55
 -22  -2  -1   97.35   13.88
  -2  22  -1  112.00   14.32
   2 -22  -1  120.32   13.41
  -2  22  -1  116.86   13.36
  -2  22   1  139.14   13.25
  -2  22   1  158.16   17.84
 -22  -2   1  125.92   14.97
  22   2   1  143.16   12.23
   2 -22   1  116.80   13.57
  -1  22  -1   34.16    9.10
 -22  -1  -1   55.27   10.98
  -1  22  -1   11.03    8.39
   1 -22  -1   39.71    9.36
 -22  -1  -1   26.95   11.22
 -22  -1   1   39.07   12.19
  -1  22   1   23.66    7.25
   1 -22   1   34.72    9.35
 -22  -1   1   40.18    9.99
  -1  22   1   37.30   10.01
   0 -22  -1    4.55    6.63
 -22   0  -1   14.81    7.84
   0  22  -1    9.04    6.67
   0  22  -1   -2.87    7.71
 -22   0  -1    4.63    9.92
   0  22   1    9.25    6.11
   0 -22   1    1.41    7.43
 -22   0   1    3.42    8.46
   0  22   1   -9.27    7.95
 -22   0   1    6.02   11.44
  -1 -22  -1   65.03   10.69
   1  22  -1   63.30   10.27
   1  22  -1   48.07   10.83
 -22   1  -1   56.52   12.54
 -22   1  -1   38.33   10.39
   1  22   1   65.76   12.72
  -1 -22   1   58.84   10.91
 -22   1   1   52.22   13.14
   1  22   1   75.37    9.42
 -22   1   1   57.90   11.14
 -22   2  -1    2.05    6.82
  -2 -22  -1   -7.86    6.11
   2  22  -1   -3.79    7.67
 -22   2  -1  -13.15    8.76
   2  22  -1    1.30    6.18
   2  22   1    4.07    6.10
 -22   2   1   16.16   11.85
   2  22   1   -4.48    7.46
  -2 -22   1   -1.64    6.85
 -22   2   1    5.03    7.83
   3  22  -1   94.88   11.86
 -22   3  -1   83.36   15.75
   3  22  -1   88.51   14.06
  -3 -22  -1   91.01   13.45
 -22   3  -1   76.44   12.31
 -22   3   1   86.61   16.15
  -3 -22   1   69.73   12.50
   3  22   1   81.44   13.76
 -22   3   1   72.56   12.14
 -22   4  -1   34.28    9.81
   4  22  -1   60.08   12.20
 -22   4  -1   75.79   14.67
  -4 -22  -1   62.81   11.22
   4  22  -1   59.32    9.63
   4  22   1   82.09   14.14
  -4 -22   1   73.69   13.11
 -22   4   1   58.14   12.30
 -22   4   1   53.70   14.27
  -5 -22  -1   72.58   12.20
   5  22  -1   79.41   10.89
 -22   5  -1   68.46   12.07
   5  22  -1   79.07   13.37
 -22   5  -1   61.45   14.35
   5  22   1   68.84   12.87
 -22   5   1   70.97   11.19
 -22   5   1   67.55   14.86
  -5 -22   1   72.56   12.41
 -22   5   1   37.70   10.33
  -6 -22  -1   16.67    9.78
   6  22  -1   28.50    7.89
 -22   6  -1   39.28   11.23
   6  22  -1   20.73    9.25
 -22   6  -1   45.66   12.90
 -22   6   1   23.49   12.16
  -6 -22   1   14.69    9.28
 -22   6   1   43.01    9.71
   6  22   1   26.77   11.02
 -22   6   1   21.07    8.80
 -22   7  -1   74.28   14.51
 -22   7  -1   74.99   12.73
   7  22  -1   82.21   13.97
  -7 -22  -1   74.53   13.33
   7  22  -1   55.67    9.94
  -7 -22   1   75.96   13.01
 -22   7   1   60.96   11.89
 -22   7   1   83.01   11.64
   7  22   1   77.14   13.18
 -22   7   1   67.41   14.46
  -8 -22  -1    4.22    9.24
 -22   8  -1   11.10   10.54
   8  22  -1   -6.55    8.21
   8  22  -1   -0.08    7.09
 -22   8  -1    2.34    7.81
 -22   8   1   16.47    9.61
  -8 -22   1   -2.69    7.90
 -22   8   1   10.52    7.68
   8  22   1    5.27    8.65
 -22   8   1   11.90   10.78
  -9 -22  -1   54.50   12.53
 -22   9  -1   64.12   12.24
 -22   9  -1   67.93   14.82
   9  22  -1   72.92   12.28
   9  22  -1   55.98   11.75
 -22   9   1   73.36   11.35
  -9 -22   1   46.02   11.43
 -22   9   1   80.99   16.24
 -22   9   1   62.72   11.97
   9  22   1   71.75   13.80
 -22  10  -1   30.89   10.86
  10  22  -1   24.73   10.59
 -10 -22  -1   13.54    9.13
 -22  10   1   19.05    9.44
  10  22   1   19.55    9.59
 -10 -22   1   26.29   10.24
 -22  10   1   23.06   12.46
 -22  11  -1   15.71    9.07
 -11 -22  -1   11.85    9.51
  11  22  -1    5.46    9.30
  11  22   1    0.60    8.97
 -22  11   1   11.24    8.99
 -11 -22   1    6.15    9.69
  23   9  -1   -2.31    7.50
  -9  23  -1    9.36    8.20
 -23  -9  -1    4.37    7.91
  -9  23   1  -14.04    8.82
 -23  -9   1   10.90    7.76
  -9  23   1   -2.53    6.68
  23   9   1   -9.06    6.43
  23   9   1   -1.21    7.94
  -8  23  -1   55.34   11.24
  -8  23  -1   53.05   12.67
 -23  -8  -1   72.91   11.71
  23   8  -1   75.48   11.99
  23   8   1   87.98   13.22
  -8  23   1   67.13   14.18
  23   8   1   68.25   10.90
 -23  -8   1   82.12   11.62
  -8  23   1   60.55   11.13
  -7  23  -1   76.06   12.40
 -23  -7  -1   83.69   12.08
  -7  23  -1   93.73   14.16
  23   7  -1   71.70   11.63
  -7  23   1   88.93   11.85
   7 -23   1   69.04   10.75
  23   7   1   80.44   11.69
  -7  23   1   86.64   15.08
 -23  -7   1   74.69   11.25
  23   6  -1   24.01    8.59
 -23  -6  -1   22.99    8.35
  -6  23  -1   18.95    8.54
  -6  23  -1   24.04   10.50
  23   6   1   22.41    8.14
 -23  -6   1   23.38    7.62
  -6  23   1   26.27    8.14
  -6  23   1   16.20   10.23
   6 -23   1   34.65    7.99
  -5  23  -1   18.58    9.64
  -5  23  -1   17.96    8.30
  23   5  -1    6.68    6.36
   5 -23  -1   16.60    7.17
 -23  -5  -1    4.49    7.44
   5 -23   1   17.78    7.84
  -5  23   1   15.61    7.87
  -5  23   1    4.52    9.17
 -23  -4  -1   26.43    7.85
  -4  23  -1   18.18    9.72
 -23  -4  -1   30.29    9.74
   4 -23  -1   23.89    8.27
  -4  23  -1   30.29    8.72
   4 -23   1   29.56    8.55
  -4  23   1   25.16    7.86
  -4  23   1   17.48   10.74
  -3  23  -1   48.79    9.94
 -23  -3  -1   43.87   11.03
  -3  23  -1   46.81   11.18
   3 -23  -1   41.81    9.40
  -3  23   1   30.79    8.33
  -3  23   1   35.25   11.10
   3 -23   1   42.04    9.79
   2 -23  -1   86.66   12.30
  -2  23  -1   83.28   11.99
 -23  -2  -1  105.95   14.21
  -2  23  -1  107.62   14.98
  -2  23   1   90.65   14.92
 -23  -2   1   97.24   14.20
   2 -23   1   80.11   12.38
  -2  23   1   92.13   11.20
  -1  23  -1   28.11   10.11
 -23  -1  -1   40.39   10.81
   1 -23  -1   30.36    9.29
 -23  -1  -1   41.58   13.37
  -1  23  -1   36.34    9.56
  -1  23   1   41.76    8.47
 -23  -1   1   39.43   14.12
  -1  23   1   28.85   10.91
 -23  -1   1   37.98   10.10
   1 -23   1   39.60   10.26
   0  23  -1   47.94    9.47
   0 -23  -1   54.72   11.14
 -23   0  -1   56.66   11.71
 -23   0  -1   76.36   15.95
   0  23  -1   58.28   11.99
 -23   0   1   70.76   13.19
   0  23   1   60.11   12.73
 -23   0   1   53.11   13.58
   0 -23   1   59.05   11.53
   0  23   1   65.66   10.06
 -23   1  -1   58.41   11.36
   1  23  -1   70.81   10.65
 -23   1  -1   48.64   12.71
   1  23  -1   63.65   12.55
  -1 -23  -1   59.03   11.39
 -23   1   1   73.72   15.89
 -23   1   1   61.32   12.61
  -1 -23   1   48.47   10.54
   1  23   1   69.93   13.38
  -2 -23  -1   21.30    9.42
   2  23  -1   35.54    8.61
   2  23  -1   30.28   10.45
 -23   2  -1   22.71   12.28
 -23   2  -1   38.78    9.88
  -2 -23   1   17.45    9.07
   2  23   1   24.67    9.54
 -23   2   1   21.88    9.83
 -23   2   1   25.72   12.42
   3  23  -1   39.80   11.26
  -3 -23  -1   49.20   11.07
   3  23  -1   41.08    8.97
 -23   3  -1   31.28    9.74
 -23   3  -1   56.36   13.73
 -23   3   1   32.57   10.24
   3  23   1   27.72   11.33
 -23   3   1   60.50   14.71
  -3 -23   1   35.13   10.93
   4  23  -1   65.84   12.08
 -23   4  -1   54.13   13.09
 -23   4  -1   52.80   11.95
   4  23  -1   64.78   10.42
  -4 -23  -1   63.60   11.07
 -23   4   1   66.64   13.15
 -23   4   1   99.34   16.31
   4  23   1   88.10   14.53
  -4 -23   1   68.46   12.27
 -23   5  -1    0.85   10.06
 -23   5  -1    5.99    8.47
  -5 -23  -1   -3.43    8.36
   5  23  -1    9.22    6.97
   5  23  -1   -5.58    7.88
 -23   5   1    8.80   11.73
   5  23   1    4.00    8.41
  -5 -23   1    7.66    8.20
 -23   5   1    0.31    7.56
 -23   6  -1   79.78   13.44
 -23   6  -1   85.05   16.03
  -6 -23  -1   81.70   13.88
   6  23  -1   98.89   12.42
   6  23  -1  110.76   15.49
  -6 -23   1  105.03   15.54
 -23   6   1   99.61   14.29
 -23   6   1  115.93   13.85
   6  23   1  132.78   17.98
 -23   6   1   65.68   14.93
 -23   7  -1    5.28    9.16
   7  23  -1   -4.69    8.11
   7  23  -1   11.39    8.63
 -23   7  -1   -5.67    9.94
  -7 -23  -1   -2.12    7.73
  -7 -23   1    2.10    9.39
 -23   7   1   16.03   11.13
   7  23   1   -7.49    8.81
 -23   7   1    2.55    9.03
 -23   7   1   13.51    7.83
  -8 -23  -1   28.39   10.46
 -23   8  -1   36.29   10.52
   8  23  -1   27.20   11.58
 -23   8  -1   30.45   13.25
 -23   8   1   31.78    8.93
 -23   8   1   34.15   10.62
  -8 -23   1   16.83    9.41
   8  23   1   31.08   12.12
 -23   8   1   36.42   12.78
   9  23  -1   83.02   15.17
 -23   9  -1  112.60   15.96
 -23   9  -1  146.34   19.99
  -9 -23  -1   98.75   14.94
   9  23   1   62.42   13.51
  -9 -23   1  101.17   15.32
 -23   9   1   67.76   16.33
 -23   9   1   85.42   14.45
  -6  24  -1  100.87   13.75
 -24  -6  -1  121.65   14.02
  24   6  -1  116.78   14.35
  -6  24  -1   85.18   15.32
  -6  24   1  102.02   16.51
  -6  24   1  114.54   13.60
  24   6   1   99.02   12.79
   6 -24   1  137.49   14.30
  24   5  -1   49.79   10.60
  -5  24  -1   55.78   12.66
  -5  24  -1   58.25   10.74
   5 -24  -1   68.56   15.60
 -24  -5  -1   48.24   12.23
   5 -24   1   64.34   10.68
  -5  24   1   42.31   12.21
  -5  24   1   58.69   10.39
  -4  24  -1    0.75    9.07
   4 -24  -1   20.51    8.06
  24   4  -1   22.82    8.66
 -24  -4  -1    4.93    8.01
  -4  24  -1   19.65    8.87
   4 -24   1   17.11    8.60
  -4  24   1   23.32    8.09
  -4  24   1   27.63   11.20
   3 -24  -1   22.29    8.40
  -3  24  -1   34.54   11.08
  -3  24  -1   34.07    9.18
 -24  -3  -1   29.07   10.37
  -3  24   1   16.81    9.96
   3 -24   1    6.04    7.94
  -3  24   1   26.17    8.08
  -2  24  -1   -1.59    7.94
   2 -24  -1    8.50    7.26
 -24  -2  -1    8.18    8.66
  -2  24  -1   13.36    7.59
   2 -24   1    3.76    7.73
  -2  24   1   -4.93    7.13
 -24  -2   1    7.13    8.76
  -2  24   1    4.85    8.75
 -24  -1  -1   57.46   11.72
  -1  24  -1   49.69   10.10
  -1  24  -1   58.44   12.72
   1 -24  -1   43.19   10.36
   1 -24   1   52.54   11.22
 -24  -1   1   51.70   11.90
  -1  24   1   50.54   12.92
 -24   0  -1   43.84   11.51
   0 -24  -1   33.33    8.75
 -24   0  -1   32.12   13.46
   0  24  -1   59.20   10.35
   0  24  -1   42.02   11.70
 -24   0   1   39.66   14.83
   0 -24   1   44.05   10.84
   0  24   1   46.95   12.70
 -24   0   1   38.00   10.70
 -24   1  -1   42.76   10.62
 -24   1  -1   65.93   15.35
   1  24  -1   69.35   10.97
  -1 -24  -1   51.30   11.23
   1  24  -1   31.39   11.46
   1  24   1   74.66   13.89
 -24   1   1   49.40   11.72
 -24   1   1   65.45   16.27
  -1 -24   1   50.83   11.23
 -24   2  -1  125.37   15.65
   2  24  -1  123.50   13.84
   2  24  -1   95.19   14.91
  -2 -24  -1  127.17   15.26
 -24   2  -1  118.48   18.55
  -2 -24   1  133.49   16.13
 -24   2   1  132.43   19.65
 -24   2   1   88.60   14.19
   2  24   1  101.31   15.86
  -3 -24  -1   28.48    9.28
   3  24  -1   27.82    8.87
 -24   3  -1   34.75   10.92
 -24   3  -1   47.59   13.96
   3  24  -1   30.95   11.47
   3  24   1   19.99   11.30
 -24   3   1   34.62   11.76
 -24   3   1   44.89   14.64
  -3 -24   1   36.13   10.29
   4  24  -1   57.03   13.09
   4  24  -1   51.34   10.01
 -24   4  -1   45.31   11.62
 -24   4  -1   55.64   14.76
  -4 -24  -1   42.93   10.52
 -24   4   1   31.60   10.42
  -4 -24   1   52.96   11.54
 -24   4   1   41.52   12.84
   4  24   1   46.31   12.48
 -24   5  -1   25.03   10.87
   5  24  -1   38.04   11.77
   5  24  -1   26.66   12.51
  -5 -24  -1   23.32   10.51
 -24   5  -1   36.28   12.07
 -24   5   1   11.42    8.68
  -5 -24   1    4.42    9.69
 -24   5   1   20.86   12.92
   5  24   1   35.95   11.81
   6  24  -1    3.91    9.40
 -24   6  -1    4.09    8.79
  -6 -24  -1    2.50    7.63
 -24   6  -1    3.31   11.07
 -24   6   1    5.10    8.37
   6  24   1   11.61    9.38
  -6 -24   1   -9.35    8.32
 -24   6   1    7.88   11.82
   0   0  -2 2011.70   79.42
   0   0  -2 2148.35   79.19
   0   0   2 2197.77   87.14
   0   0   2 2363.36   87.50
   0   1  -2  153.18    6.99
  -1   0  -2  109.84    6.07
   1   0  -2  133.99    7.42
   0  -1  -2  140.35    6.06
  -1   0  -2  134.36    6.31
   1   0  -2  148.81    6.64
   0   1   2  155.34    7.47
   1   0   2  139.33    6.80
  -1   0   2  140.18    7.82
  -1   0   2  157.69    7.41
   1   0   2  147.66    7.42
   0   1   2  142.61    7.05
  -1   0   2  155.12    7.24
   0  -1   2  147.73    7.08
   0  -1   2  144.53    7.53
  -1  -1  -2    1.16    1.60
  -1  -1  -2    1.71    1.33
   1   1  -2    3.28    2.25
   1  -1  -2    0.83    1.57
   1  -1  -2    1.27    2.61
  -1   1  -2    8.38    2.35
  -1   1  -2    3.84    1.52
   1   1  -2    3.25    2.36
  -1  -1   2    3.22    2.43
  -1  -1   2    0.94    2.21
  -1   1   2    0.41    1.71
   1   1   2    2.09    1.91
   1   1   2    3.08    1.84
   1  -1   2    3.05    2.40
  -1   1   2    2.17    2.61
   1  -1   2   -0.37    1.44
   1  -2  -2 1469.65   57.19
  -1   2  -2 1469.52   56.86
   2   1  -2 1500.03   57.78
  -2  -1  -2 1470.52   57.75
  -2  -1  -2 1422.03   56.88
   2   1  -2 1579.99   59.18
  -1   2  -2 1549.91   57.87
  -2  -1   2 1508.23   56.37
  -1   2   2 1498.90   55.77
   1  -2   2 1512.44   56.96
  -1   2   2 1469.98   56.95
  -2  -1   2 1467.64   56.72
   2   1   2 1262.92   55.87
   1  -2   2 1479.16   55.47
   2   0  -2   70.61    4.62
   0  -2  -2   74.76    3.63
   2   0  -2   67.81    5.50
   0   2  -2   73.24    5.29
  -2   0  -2   74.44    3.97
   0  -2  -2   71.33    4.43
  -2   0  -2   68.73    4.29
   2   0   2   72.82    4.96
   0  -2   2   80.92    5.56
  -2   0   2   70.62    5.78
   0  -2   2   76.03    4.62
  -2   0   2   79.71    4.80
   2   0   2   67.12    4.01
   0   2   2   80.55    5.39
  -2   0   2   68.13    5.65
  -2   1  -2  750.72   29.73
  -1  -2  -2  798.71   30.71
  -1  -2  -2  762.44   29.88
  -2   1  -2  679.93   28.69
   1   2  -2  714.20   29.77
  -1  -2  -2  843.97   28.68
   1   2  -2  707.15   30.13
  -2   1   2  763.16   30.11
  -1  -2   2  757.70   30.68
   1   2   2  791.62   30.49
   2  -1   2  758.43   29.18
  -2   1   2  733.48   30.98
   1   2   2  756.14   29.02
  -1  -2   2  769.14   30.28
  -2   1   2  787.30   29.91
   2  -1   2  730.54   30.73
  -2  -2  -2  857.86   31.96
  -2  -2  -2  827.73   33.23
   2   2  -2  856.48   33.46
  -2   2  -2  807.88   33.20
  -2  -2   2  821.65   32.85
   2  -2   2  848.93   33.33
   2   2   2  811.73   32.55
   2   2   2  851.00   31.46
  -2   2   2  803.01   33.64
  -2   2   2  815.88   32.31
  -2   2   2  834.07   31.96
  -2  -2   2  798.85   32.84
  -2   3  -2 1112.91   43.04
   3   2  -2 1140.79   44.57
  -2   3  -2 1151.68   44.57
   2  -3  -2 1114.74   43.39
  -3  -2  -2 1136.59   43.27
  -3  -2  -2 1124.20   44.46
  -2   3   2 1117.83   41.82
   3   2   2 1035.62   41.50
   3   2   2  991.80   41.93
  -2   3   2 1130.79   43.31
   2  -3   2 1108.70   42.84
  -3  -2   2 1074.15   42.71
  -3  -2   2 1076.05   42.38
  -3  -1  -2 4020.97  146.21
   1  -3  -2 3987.71  146.37
  -1   3  -2 3866.33  147.09
   3   1  -2 3879.16  146.91
  -3  -1  -2 3429.15  145.96
  -3  -1  -2 3965.27  146.96
  -3  -1   2 4048.22  148.70
  -3  -1   2 3867.76  149.49
  -1   3   2 3792.17  149.42
   3   1   2 3811.00  148.32
   1  -3   2 3990.92  149.35
  -3  -1   2 3873.06  149.33
  -1   3   2 3977.29  148.11
   0  -3  -2 1353.74   51.79
   0   3  -2 1366.39   52.39
  -3   0  -2 1293.73   51.61
  -3   0   2 1355.54   53.10
   0   3   2 1334.16   51.45
   0  -3   2 1375.88   53.08
  -3   0   2 1338.96   52.07
   0   3   2 1406.88   53.11
   3   0   2 1347.05   51.71
  -3   0   2 1336.11   53.20
  -3   0   2 1313.80   52.68
   3   0   2 1355.67   52.85
  -1  -3  -2 1004.63   39.42
   1   3  -2  957.58   39.79
  -3   1  -2 1006.07   39.23
   1   3  -2 1036.58   39.99
  -3   1   2  962.70   38.04
  -1  -3   2  963.31   38.48
   1   3   2  933.40   38.32
   3  -1   2 1015.32   38.65
   3  -1   2  989.33   36.81
  -3   1   2  900.46   38.83
  -3   1   2  990.01   37.33
  -2  -3  -2 1111.70   43.06
  -3   2  -2 1055.36   42.86
   2   3  -2 1109.93   43.41
   2   3   2 1178.38   43.05
   3  -2   2 1071.87   43.14
  -3   2   2 1063.40   42.47
  -2  -3   2 1065.76   43.04
  -3   2   2 1083.66   41.68
  -3   2   2 1052.43   43.71
  -3   3  -2   11.77    1.33
  -3  -3  -2   14.33    1.48
  -3   3  -2   11.82    2.88
  -3  -3  -2   11.21    2.75
   3   3  -2   13.52    2.91
  -3   3   2   14.15    1.47
  -3   3   2   10.08    3.70
   3  -3   2   14.80    1.30
   3   3   2    8.17    2.25
   3  -3   2   16.17    2.99
  -3  -3   2    6.93    2.65
  -3   3   2   14.23    2.53
  -3  -3   2    9.69    3.12
  -4  -3  -2  246.81   12.19
   3  -4  -2  270.69   10.78
  -3   4  -2  263.50   10.86
  -4  -3  -2  260.85   10.92
  -3   4  -2  259.40   12.30
   4   3  -2  265.92   12.35
  -3   4   2  267.77   13.52
   3  -4   2  292.17   11.02
  -4  -3   2  259.96   12.49
  -3   4   2  266.45   12.06
  -4  -3   2  271.96   12.99
   3  -4   2  251.58   12.72
   4   3   2  269.81   12.42
  -4  -2  -2  159.21    8.52
   2  -4  -2  157.11    7.49
  -4  -2  -2  170.75    7.58
  -2   4  -2  151.22    8.59
   4   2  -2  193.99    8.79
  -2   4  -2  173.67    7.42
  -2   4   2  161.43    9.15
   4   2   2  158.56    7.94
  -4  -2   2  163.93    8.94
  -4  -2   2  171.84    8.37
   2  -4   2  157.32    8.76
  -2   4   2  156.49    7.66
   4   2   2  152.59    7.66
  -1   4  -2   63.44    4.99
  -4  -1  -2   58.34    4.02
  -1   4  -2   63.46    3.77
   1  -4  -2   62.18    4.03
   4   1  -2   53.39    4.56
  -4  -1  -2   63.88    4.71
  -4  -1  -2   67.54    4.37
  -4  -1   2   62.90    4.55
  -1   4   2   60.84    3.75
  -4  -1   2   62.47    5.76
   1  -4   2   62.54    5.53
  -4  -1   2   61.53    5.63
  -1   4   2   65.69    5.49
   4   1   2   61.97    4.07
   0  -4  -2  134.27    6.58
  -4   0  -2  115.61    6.47
   0   4  -2  131.78    7.38
  -4   0   2  134.51    8.35
  -4   0   2  137.16    6.57
   0   4   2  137.65    5.85
   4   0   2  116.90    6.89
   0   4   2  134.65    7.75
   4   0   2  129.65    6.13
  -4   0   2  131.87    7.24
  -4   0   2  125.01    8.45
   0  -4   2  147.17    7.85
   1   4  -2 1474.94   56.09
  -1  -4  -2 1483.38   55.55
  -1  -4  -2 1333.29   54.03
  -4   1  -2 1419.07   55.37
   1   4   2 1414.98   57.46
   1   4   2 1467.08   55.49
   4  -1   2 1498.65   57.42
  -4   1   2 1517.44   55.97
  -1  -4   2 1462.21   57.52
  -4   1   2 1458.25   57.13
   4  -1   2 1470.41   55.87
  -4   1   2 1414.84   57.86
  -4   2  -2  452.35   19.74
  -2  -4  -2  488.51   19.94
   2   4  -2  468.21   20.27
  -4   2   2  496.36   18.90
   4  -2   2  475.30   20.81
   2   4   2  471.93   18.64
  -4   2   2  497.15   20.42
   2   4   2  481.36   20.81
   4  -2   2  472.68   18.95
  -2  -4   2  483.47   20.88
  -4   2   2  486.14   21.66
   2   4   2  504.24   18.66
   3   4  -2    5.55    2.97
  -4   3  -2    6.45    1.21
  -3  -4  -2    6.78    2.59
  -4   3  -2    3.82    2.35
  -4   3   2    9.99    3.75
   4  -3   2    5.06    2.45
   4  -3   2    7.06    1.17
   3   4   2    7.86    2.45
  -4   3   2    7.91    0.96
   3   4   2   11.80    1.35
  -4   3   2    6.66    2.22
  -4   3   2    8.23    1.09
  -3  -4   2    5.85    2.77
   4  -4  -2   49.62    2.69
  -4   4  -2   47.45    4.73
   4   4  -2   44.15    4.65
  -4  -4  -2   49.36    4.75
  -4   4  -2   54.51    3.56
   4   4   2   51.87    4.75
  -4   4   2   37.46    5.24
  -4   4   2   55.50    4.68
   4  -4   2   53.15    3.13
  -4  -4   2   41.44    4.61
   4  -4   2   62.26    5.32
  -5  -4  -2  783.88   31.82
  -4   5  -2  763.39   30.43
  -5  -4  -2  750.27   30.32
  -4   5  -2  734.51   31.77
   4  -5  -2  793.29   29.81
   5   4  -2  778.40   31.85
  -4   5   2  755.03   30.84
  -4   5   2  758.28   32.42
  -5  -4   2  744.11   31.32
   4  -5   2  739.31   31.29
   4  -5   2  778.77   29.66
   5   4   2  755.34   31.15
   5   3  -2   67.32    5.37
  -5  -3  -2   59.79    5.29
   3  -5  -2   69.90    4.01
  -5  -3  -2   66.23    4.23
  -3   5  -2   64.03    5.85
  -3   5  -2   71.86    4.31
  -3   5   2   62.98    4.72
  -5  -3   2   61.95    5.36
   3  -5   2   70.05    5.82
  -5  -3   2   47.26    5.18
  -3   5   2   59.64    6.02
   5   3   2   67.06    5.13
   3  -5   2   64.18    3.88
  -2   5  -2  659.06   28.03
   5   2  -2  704.20   27.96
  -5  -2  -2  663.19   26.98
  -5  -2  -2  643.56   27.82
  -2   5  -2  697.32   26.88
   2  -5  -2  691.53   26.92
   5   2   2  687.27   27.33
  -5  -2   2  663.60   28.90
   2  -5   2  666.82   28.02
  -5  -2   2  685.70   27.49
  -2   5   2  694.25   28.80
  -5  -2   2  638.30   28.27
  -2   5   2  681.22   27.04
  -1   5  -2  285.00   13.26
  -5  -1  -2  276.88   12.28
  -1   5  -2  287.26   12.15
  -5  -1  -2  268.22   12.49
   1  -5  -2  274.28   12.25
  -5  -1  -2  293.33   12.88
  -5  -1   2  283.72   13.64
  -5  -1   2  282.56   13.92
  -1   5   2  277.53   13.80
  -5  -1   2  276.59   12.25
   1  -5   2  271.46   13.22
  -5  -1   2  274.28   13.07
  -1   5   2  291.22   11.93
   0  -5  -2   99.41    5.58
   0   5  -2   85.23    6.23
  -5   0  -2   91.22    5.75
  -5   0  -2   95.35    5.66
   0  -5   2   95.45    6.51
  -5   0   2   98.47    5.03
  -5   0   2   81.90    6.11
  -5   0   2   90.53    7.32
   0   5   2   84.25    6.64
  -5   0   2   83.36    7.08
   0   5   2   90.29    4.54
   1   5  -2 1408.67   56.09
  -5   1  -2 1466.38   55.57
  -1  -5  -2 1381.27   55.52
   5  -1   2 1484.51   54.72
   1   5   2 1449.32   54.20
  -5   1   2 1425.32   55.88
  -5   1   2 1468.37   54.38
  -5   1   2 1431.51   56.66
   5  -1   2 1332.49   55.78
  -5   1   2 1446.74   56.60
   1   5   2 1314.64   56.07
  -1  -5   2 1426.46   56.30
  -5   2  -2 1461.13   59.55
   2   5  -2 1502.83   60.11
  -2  -5  -2 1492.42   59.66
   5  -2  -2 1621.47   58.12
   5  -2   2 1463.72   58.95
   2   5   2 1383.38   56.87
   2   5   2 1508.20   59.16
  -5   2   2 1511.40   58.74
  -5   2   2 1614.31   56.79
  -5   2   2 1527.84   59.78
  -2  -5   2 1454.87   59.10
   5  -2   2 1502.79   57.37
  -5   3  -2    2.32    2.55
  -3  -5  -2    0.49    2.39
   3   5  -2    1.08    2.83
  -5   3  -2    1.84    1.35
   5  -3   2    3.75    1.61
  -5   3   2   -2.03    3.58
   3   5   2    0.62    2.65
   3   5   2    2.27    1.30
  -3  -5   2   -1.09    2.72
   5  -3   2   11.16    3.06
  -5   3   2    5.99    2.87
  -4  -5  -2  451.16   20.69
  -5   4  -2  462.00   20.79
   4   5  -2  491.72   21.24
  -5   4  -2  487.74   19.17
  -5   4   2  454.26   20.42
   4   5   2  526.23   21.08
  -5   4   2  466.47   22.21
   4   5   2  454.67   18.97
  -4  -5   2  467.75   21.23
   5  -4   2  477.15   20.85
   5  -4   2  482.41   19.01
  -5  -5  -2    5.19    3.74
  -5   5  -2    9.76    4.15
  -5   5  -2    6.42    2.67
   5  -5  -2   10.93    1.47
   5   5  -2   13.35    3.95
   5  -5   2   11.66    4.08
  -5  -5   2   16.89    4.33
   5  -5   2   10.46    2.28
  -5   5   2    9.59    3.55
   5   5   2    8.82    2.34
  -5   5   2    6.28    5.07
   5   5   2   11.52    3.52
  -5   6  -2   10.58    3.39
   6   5  -2    8.09    4.65
  -6  -5  -2    7.50    4.91
   5  -6  -2    4.77    2.02
  -5   6  -2    7.20    4.58
  -6  -5   2    0.18    4.86
  -5   6   2    2.93    4.13
   6   5   2    3.62    2.70
   6   5   2    3.25    3.70
  -5   6   2   10.11    5.47
   5  -6   2   10.91    4.55
  -6  -4  -2   50.08    5.81
  -4   6  -2   60.71    5.25
   6   4  -2   59.58    5.98
  -6  -4  -2   51.84    4.87
  -4   6  -2   49.95    6.03
   4  -6  -2   60.57    4.09
  -6  -4   2   58.20    5.84
   4  -6   2   53.48    5.99
   6   4   2   50.95    5.63
  -4   6   2   51.50    5.13
  -4   6   2   58.86    7.44
  -3   6  -2  435.52   18.05
  -6  -3  -2  455.09   19.39
   3  -6  -2  406.48   17.63
   6   3  -2  423.15   19.16
  -3   6  -2  421.52   19.30
  -6  -3  -2  425.57   17.95
  -6  -3   2  409.55   18.61
   6   3   2  430.17   18.56
  -6  -3   2  409.41   19.48
  -3   6   2  418.31   18.20
  -3   6   2  448.47   20.13
   3  -6   2  404.53   19.08
  -6  -2  -2   13.76    2.73
  -6  -2  -2   13.66    3.13
  -2   6  -2    9.11    2.32
  -6  -2  -2   11.93    3.17
  -2   6  -2    6.55    3.22
   2  -6  -2    6.16    2.32
  -2   6   2    8.23    3.53
  -2   6   2   10.97    2.60
  -6  -2   2    8.53    4.58
   2  -6   2   10.15    3.45
  -6  -2   2   11.44    2.89
  -6  -2   2    4.76    3.34
  -1   6  -2  351.37   14.99
  -6  -1  -2  341.13   15.59
  -1   6  -2  345.33   16.14
  -6  -1  -2  358.67   15.22
  -6  -1  -2  364.20   15.76
   1  -6  -2  322.75   15.00
  -6  -1   2  328.58   16.80
  -6  -1   2  309.21   16.29
   1  -6   2  360.72   16.42
  -1   6   2  345.46   14.64
  -1   6   2  346.69   16.66
  -6  -1   2  355.14   16.08
  -6  -1   2  372.45   15.05
   0   6  -2    8.83    2.53
   0   6  -2   12.80    3.48
  -6   0  -2   10.78    2.87
  -6   0  -2    9.17    2.79
   0  -6  -2    7.07    2.40
  -6   0   2   10.57    2.19
   0   6   2   11.97    2.17
  -6   0   2    9.31    4.19
  -6   0   2   10.14    4.03
  -6   0   2   16.30    3.65
   0  -6   2   15.14    3.81
   0   6   2   16.19    3.83
  -1  -6  -2 1427.81   57.31
  -6   1  -2 1489.63   57.39
   1   6  -2 1453.51   57.80
   6  -1   2 1420.66   58.48
  -6   1   2 1465.37   58.70
  -1  -6   2 1490.19   59.18
  -6   1   2 1550.82   56.96
   6  -1   2 1486.86   57.60
   1   6   2 1520.63   56.98
  -6   1   2 1434.02   59.33
   1   6   2 1465.42   59.11
  -6   1   2 1522.50   59.48
   2   6  -2   26.08    4.33
  -6   2  -2   34.95    3.03
  -6   2  -2   31.40    4.41
  -2  -6  -2   37.65    4.58
  -6   2   2   38.29    4.51
   2   6   2   38.34    2.96
  -6   2   2   34.08    5.19
   6  -2   2   41.71    3.55
  -6   2   2   36.67    2.17
   2   6   2   35.90    4.64
   6  -2   2   36.43    4.43
  -2  -6   2   32.64    4.81
  -6   3  -2   48.72    3.98
  -3  -6  -2   48.11    5.27
  -6   3  -2   49.14    5.27
   3   6  -2   59.31    6.13
  -6   3   2   32.81    6.10
   3   6   2   47.31    3.42
   3   6   2   51.01    5.77
  -6   3   2   43.22    4.99
  -3  -6   2   37.45    5.41
   6  -3   2   53.78    5.24
   6  -3   2   48.03    4.00
  -6   4  -2   72.47    6.89
  -4  -6  -2   80.99    7.08
  -6   4  -2   81.42    5.41
   4   6  -2   70.89    7.40
   6  -4   2   84.89    7.06
   4   6   2   66.70    4.67
   6  -4   2   74.50    5.14
  -4  -6   2   68.92    7.05
   4   6   2   69.68    6.88
  -6   4   2   72.25    7.73
  -6   4   2   63.32    6.22
  -5  -6  -2  325.54   16.84
  -6   5  -2  342.62   17.00
   5   6  -2  371.23   17.26
  -6   5  -2  342.36   15.22
   6  -5   2  348.57   14.98
   5   6   2  378.62   17.58
   6  -5   2  348.42   16.70
  -6   5   2  341.27   16.61
  -5  -6   2  345.16   17.35
  -6   5   2  351.44   19.28
   5   6   2  331.54   14.82
   6  -6  -2   21.87    2.03
  -6   6  -2   10.38    5.52
  -6  -6  -2   25.72    6.04
   6   6  -2   22.18    5.51
  -6   6  -2   23.40    4.06
  -6   6   2   19.93    5.36
   6   6   2   18.66    3.32
   6   6   2   17.81    4.72
   6  -6   2   16.95    4.68
  -6  -6   2   20.10    6.15
  -6   6   2   14.79    6.08
  -6   7  -2  225.78   12.08
   6  -7  -2  235.29    9.93
   7   6  -2  231.88   13.03
  -6   7  -2  216.92   13.37
  -7  -6  -2  231.17   13.29
  -7  -6   2  214.54   13.82
   7   6   2  235.99   13.20
   6  -7   2  258.20   13.17
  -6   7   2  246.60   15.97
  -6   7   2  232.38   12.76
   7   6   2  228.10   11.33
  -7  -5  -2  165.47   11.02
  -7  -5  -2  169.62    9.57
   5  -7  -2  179.48    8.34
  -5   7  -2  177.03    9.94
   7   5  -2  168.25   10.85
  -5   7  -2  169.12   11.24
  -5   7   2  186.79   12.94
   5  -7   2  176.62   11.19
   7   5   2  191.77   11.52
  -7  -5   2  159.41   11.53
  -5   7   2  184.36   11.02
  -4   7  -2 1069.14   45.03
  -4   7  -2 1107.55   43.84
   7   4  -2 1073.98   44.74
   4  -7  -2 1093.66   42.98
  -7  -4  -2 1102.57   43.70
  -7  -4  -2 1139.48   45.05
  -4   7   2 1104.87   46.22
  -4   7   2 1109.66   44.19
   4  -7   2 1130.79   44.79
  -7  -4   2 1123.98   44.59
   7   4   2 1008.06   44.28
   7   3  -2  380.90   18.70
   3  -7  -2  427.07   17.67
  -3   7  -2  404.65   19.60
  -7  -3  -2  423.75   19.12
  -3   7  -2  403.07   17.94
  -7  -3  -2  422.87   17.98
   3  -7   2  410.23   19.21
  -3   7   2  427.86   20.17
  -7  -3   2  378.06   19.56
  -3   7   2  409.78   18.14
  -7  -3   2  395.05   18.35
  -2   7  -2  482.81   20.87
   2  -7  -2  487.54   20.79
  -7  -2  -2  479.55   21.58
  -7  -2  -2  538.30   21.22
  -7  -2  -2  475.71   21.94
  -2   7  -2  496.15   22.08
  -7  -2   2  492.32   22.71
  -2   7   2  500.34   21.20
  -7  -2   2  466.17   23.95
   2  -7   2  499.32   22.67
  -2   7   2  501.99   23.17
  -7  -2   2  522.18   21.51
  -7  -2   2  520.05   23.44
  -1   7  -2   53.81    5.21
  -7  -1  -2   54.86    5.89
  -7  -1  -2   65.89    5.70
  -7  -1  -2   71.51    6.31
   1  -7  -2   61.94    5.38
  -1   7  -2   56.64    6.15
  -1   7   2   55.23    6.35
  -7  -1   2   55.77    7.06
  -1   7   2   56.94    4.93
  -7  -1   2   58.47    6.11
  -7  -1   2   53.65    6.81
  -7  -1   2   54.27    4.73
   1  -7   2   51.89    6.19
   0   7  -2  943.46   37.21
  -7   0  -2  907.89   37.58
  -7   0  -2  891.56   37.19
  -7   0  -2  932.36   37.29
   0   7  -2  943.30   37.97
   0  -7  -2  902.27   37.15
  -7   0   2  923.93   39.47
  -7   0   2  941.95   37.17
   0  -7   2  919.62   39.10
   0   7   2  972.30   37.17
  -7   0   2  994.26   39.01
  -7   0   2  941.85   39.86
   0   7   2  918.96   39.41
   1   7  -2  644.11   28.15
  -1  -7  -2  698.10   28.41
   1   7  -2  670.73   28.78
  -7   1  -2  694.40   28.54
  -7   1   2  706.64   30.10
  -7   1   2  665.23   30.04
   7  -1   2  693.07   28.69
   1   7   2  665.87   29.66
  -1  -7   2  664.27   29.41
   1   7   2  693.59   27.17
  -7   1   2  698.89   26.92
  -7   1   2  679.72   29.07
  -7   2  -2  262.60   13.06
  -7   2  -2  243.57   11.59
   2   7  -2  278.93   13.73
  -2  -7  -2  240.13   12.85
  -7   2   2  259.91   15.16
   2   7   2  285.99   14.14
  -7   2   2  253.91   13.28
  -7   2   2  252.43   10.42
   2   7   2  256.76   11.19
   7  -2   2  246.78   12.89
  -2  -7   2  257.82   14.02
  -7   3  -2   26.97    3.40
  -3  -7  -2   20.99    5.24
   3   7  -2   24.88    5.90
  -7   3  -2   15.04    4.66
  -3  -7   2   11.64    5.28
   3   7   2   24.59    3.08
  -7   3   2   15.79    5.82
   3   7   2   24.49    5.02
   7  -3   2   34.08    4.90
  -7   3   2   25.39    5.46
  -4  -7  -2  296.77   15.37
  -7   4  -2  296.28   13.46
   4   7  -2  313.19   16.00
  -7   4  -2  284.19   15.27
   7  -4   2  326.51   15.09
  -7   4   2  275.72   14.97
  -4  -7   2  303.57   16.02
  -7   4   2  304.17   17.74
   4   7   2  306.91   13.06
   4   7   2  261.64   15.24
  -7   5  -2 1876.79   73.37
  -5  -7  -2 1840.02   73.39
   5   7  -2 1770.11   73.47
  -7   5  -2 1882.60   71.41
  -5  -7   2 1893.00   74.81
   5   7   2 1905.47   74.56
  -7   5   2 1900.76   74.06
   7  -5   2 1973.37   73.96
  -7   5   2 1858.26   75.42
   5   7   2 1707.64   72.06
  -6  -7  -2  659.13   28.94
   6   7  -2  654.96   28.85
  -7   6  -2  661.74   27.11
  -7   6  -2  623.99   28.76
  -7   6   2  660.53   30.63
   7  -6   2  677.94   28.71
  -7   6   2  674.30   28.93
   6   7   2  702.43   29.47
   6   7   2  640.00   26.98
  -6  -7   2  618.34   29.31
  -7   7  -2  428.91   21.73
  -7  -7  -2  459.00   21.88
  -7   7  -2  449.81   20.33
   7   7  -2  444.19   21.53
   7  -7  -2  485.60   18.02
  -7  -7   2  460.20   21.90
  -7   7   2  436.86   23.34
   7   7   2  466.74   21.77
   7   7   2  463.03   19.59
   7  -7   2  461.34   20.85
  -7   7   2  436.95   21.09
   7  -8  -2  954.01   36.98
  -8  -7  -2  960.80   40.62
  -7   8  -2  935.40   40.51
  -7   8  -2  954.38   39.22
   8   7  -2  955.79   40.35
  -7   8   2  963.74   43.09
  -8  -7   2  987.19   41.66
   8   7   2 1032.31   41.67
   8   7   2  984.40   39.56
   7  -8   2  980.46   40.56
  -7   8   2  936.29   40.85
   8   6  -2  210.14   12.51
  -6   8  -2  215.42   11.75
   6  -8  -2  220.37    9.86
  -6   8  -2  226.62   13.21
  -8  -6  -2  204.84   12.72
   6  -8   2  220.29   12.28
   8   6   2  214.86   10.86
  -6   8   2  207.74   14.15
   8   6   2  222.12   13.10
  -8  -6   2  211.98   12.66
  -6   8   2  201.97   11.95
   8   5  -2  276.35   14.77
  -8  -5  -2  293.60   15.17
  -5   8  -2  291.42   14.23
   5  -8  -2  284.93   12.72
  -5   8  -2  291.14   15.80
  -8  -5  -2  263.99   13.65
  -8  -5   2  285.08   14.92
   5  -8   2  292.47   15.06
  -5   8   2  291.34   16.63
   8   5   2  277.04   14.66
  -5   8   2  277.75   14.33
  -4   8  -2  242.69   13.76
  -4   8  -2  250.46   12.59
   4  -8  -2  252.51   11.62
  -8  -4  -2  235.10   13.37
  -8  -4  -2  235.52   12.25
   8   4  -2  244.75   13.59
  -4   8   2  260.82   13.13
  -8  -4   2  232.87   13.55
  -4   8   2  261.83   15.83
   4  -8   2  245.92   13.49
  -3   8  -2   32.84    4.54
  -3   8  -2   37.63    6.08
   8   3  -2   30.54    5.53
   3  -8  -2   34.08    4.45
  -8  -3  -2   36.14    5.57
  -8  -3  -2   28.76    4.63
  -8  -3   2   40.41    6.59
   3  -8   2   24.36    5.59
  -3   8   2   34.65    5.06
  -3   8   2   41.67    7.12
  -8  -3   2   33.75    5.23
  -8  -2  -2  504.62   21.86
  -8  -2  -2  506.60   22.26
  -8  -2  -2  495.92   22.76
  -2   8  -2  482.52   22.65
  -2   8  -2  484.79   21.76
   2  -8  -2  509.12   21.53
  -2   8   2  474.33   23.54
  -8  -2   2  510.57   21.27
  -8  -2   2  459.88   24.43
  -2   8   2  486.32   20.96
  -8  -2   2  489.53   22.48
  -8  -2   2  485.53   23.58
   2  -8   2  488.54   22.50
  -8  -1  -2  467.75   22.73
  -1   8  -2  490.97   21.92
  -8  -1  -2  518.62   22.38
  -8  -1  -2  557.32   22.35
   1  -8  -2  485.92   21.88
  -1   8  -2  484.46   22.72
   1  -8   2  489.27   23.22
  -8  -1   2  495.95   23.10
  -8  -1   2  505.73   23.82
  -8  -1   2  509.66   21.46
  -1   8   2  526.84   21.49
  -1   8   2  533.14   23.98
  -8  -1   2  464.40   24.18
  -8   0  -2   83.43    7.74
   0   8  -2   65.63    7.22
   0  -8  -2   82.01    6.99
   0   8  -2   78.45    7.27
  -8   0  -2   98.89    7.80
  -8   0  -2   83.37    7.08
  -8   0   2   80.21    5.57
  -8   0   2   80.62    8.56
   0   8   2   65.66    5.94
   0   8   2   50.84    7.45
  -8   0   2   72.79    7.30
  -8   0   2   76.66    8.95
   0  -8   2   67.16    7.61
  -1  -8  -2  352.41   17.48
   1   8  -2  379.35   18.19
  -8   1  -2  381.18   17.98
   1   8  -2  375.70   17.56
   8  -1   2  402.41   17.86
  -8   1   2  369.82   15.79
   1   8   2  411.16   19.66
   1   8   2  399.87   16.35
  -1  -8   2  358.61   18.87
  -8   1   2  395.53   20.37
  -8   1   2  351.90   18.32
  -8   1   2  354.14   19.45
   2   8  -2   45.08    6.43
  -8   2  -2   44.83    6.59
  -2  -8  -2   37.48    5.86
   2   8  -2   44.20    5.74
  -8   2   2   38.08    3.29
  -8   2   2   34.50    7.00
   8  -2   2   45.77    5.45
   2   8   2   51.35    7.23
   2   8   2   46.26    4.13
  -8   2   2   46.86    6.44
  -2  -8   2   45.77    7.07
  -8   3  -2  372.38   18.36
  -3  -8  -2  379.93   18.41
   3   8  -2  389.33   18.76
  -8   3  -2  372.66   16.67
   3   8   2  412.04   19.43
   8  -3   2  401.05   18.36
  -8   3   2  344.84   18.87
  -8   3   2  394.46   20.84
  -3  -8   2  379.58   19.47
   3   8   2  382.41   16.33
  -8   4  -2  909.85   35.67
  -8   4  -2  894.37   37.63
  -4  -8  -2  925.04   37.81
   4   8  -2  824.73   37.57
   4   8   2  884.20   37.95
  -8   4   2  918.33   39.05
   8  -4   2  888.45   37.07
  -8   4   2  869.96   37.66
   4   8   2  887.52   35.21
  -4  -8   2  893.39   38.26
  -8   5  -2 1067.90   43.40
   5   8  -2 1018.03   43.15
  -8   5  -2 1026.71   41.24
  -5  -8  -2 1028.14   43.30
   8  -5   2 1112.08   44.20
   5   8   2 1185.33   45.53
  -8   5   2 1071.81   46.06
  -8   5   2 1046.32   44.51
   5   8   2 1038.85   42.44
  -5  -8   2 1005.76   45.03
  -8   6  -2  489.87   23.34
  -8   6  -2  506.69   21.50
  -6  -8  -2  499.23   23.46
   6   8  -2  487.75   23.69
  -8   6   2  520.28   23.42
   8  -6   2  503.01   22.79
  -8   6   2  500.03   25.25
   6   8   2  522.69   23.89
   6   8   2  486.99   21.33
  -6  -8   2  495.36   23.97
  -8   7  -2  390.14   17.93
   7   8  -2  391.51   19.91
  -7  -8  -2  402.35   19.80
  -8   7  -2  386.34   19.92
   8  -7   2  388.66   18.52
  -7  -8   2  387.44   19.89
  -8   7   2  389.30   19.63
   7   8   2  408.59   17.65
   7   8   2  404.64   20.16
  -8   7   2  380.19   21.43
  -8   8  -2   24.92    4.53
  -8   8  -2    8.55    4.93
   8  -8  -2   27.20    2.15
   8   8  -2   19.50    5.66
  -8  -8  -2   23.88    5.62
  -8   8   2   25.99    7.05
  -8   8   2   26.60    5.76
   8   8   2   28.82    4.12
   8  -8   2   19.29    4.44
  -8  -8   2   20.40    5.52
   8   8   2   22.84    5.71
  -9  -8  -2  142.17   10.65
   8  -9  -2  128.32    6.58
   9   8  -2  155.54   11.03
  -8   9  -2  141.40   10.75
  -8   9  -2  143.66    9.70
   8  -9   2  140.60    9.64
   9   8   2  128.32    8.42
  -9  -8   2  157.42   11.25
  -8   9   2  126.54   10.18
   9   8   2  128.82   10.90
  -8   9   2  119.95   11.31
   7  -9  -2  326.77   13.74
  -9  -7  -2  305.33   16.99
   9   7  -2  335.29   17.14
  -7   9  -2  314.58   16.08
  -7   9  -2  313.97   17.10
   9   7   2  323.48   17.23
   7  -9   2  326.48   16.14
  -7   9   2  294.51   18.20
  -9  -7   2  325.34   16.97
  -7   9   2  331.68   16.87
   9   7   2  313.38   15.06
  -6   9  -2  234.07   13.72
   9   6  -2  232.87   13.26
  -6   9  -2  238.63   12.74
   6  -9  -2  226.00   10.65
  -9  -6  -2  221.81   13.42
  -9  -6   2  240.66   14.18
  -6   9   2  239.40   13.71
   9   6   2  267.72   14.52
   9   6   2  245.08   12.30
  -6   9   2  259.02   16.26
   6  -9   2  247.91   13.67
  -9  -5  -2   55.95    7.05
  -9  -5  -2   62.43    6.19
  -5   9  -2   66.70    6.48
   5  -9  -2   62.94    5.19
   9   5  -2   58.32    6.74
  -5   9  -2   71.35    7.65
   5  -9   2   67.11    7.11
   9   5   2   55.73    6.52
  -9  -5   2   59.68    6.65
  -5   9   2   61.15    7.82
  -5   9   2   70.00    6.93
   9   4  -2  644.88   28.25
  -4   9  -2  647.08   28.68
  -9  -4  -2  620.69   27.33
  -9  -4  -2  657.39   28.70
  -4   9  -2  656.59   27.69
   4  -9  -2  637.54   26.68
   4  -9   2  649.45   28.69
  -9  -4   2  629.89   27.95
  -4   9   2  628.45   27.77
  -4   9   2  693.21   30.37
  -3   9  -2  244.66   13.03
  -3   9  -2  240.05   14.35
  -9  -3  -2  250.16   12.90
   3  -9  -2  250.05   12.51
  -9  -3  -2  256.29   13.53
  -3   9   2  260.50   15.26
  -9  -3   2  245.16   13.16
  -9  -3   2  274.41   15.49
   3  -9   2  253.43   14.56
  -3   9   2  245.82   13.18
   2  -9  -2  127.19    8.54
  -2   9  -2  132.95    9.25
  -9  -2  -2  133.01   10.34
  -9  -2  -2  134.32    9.72
  -9  -2  -2  139.24    9.21
  -2   9  -2  126.88   10.43
   2  -9   2  131.57   10.75
  -9  -2   2  149.50   11.32
  -9  -2   2  130.51   10.02
  -9  -2   2  146.86    8.58
  -9  -2   2  112.84   11.35
  -2   9   2  137.23    8.78
  -2   9   2  128.62   10.79
  -9  -1  -2  257.93   13.42
   1  -9  -2  256.71   13.12
  -9  -1  -2  247.96   12.96
  -9  -1  -2  216.48   14.10
  -1   9  -2  231.46   13.68
  -1   9  -2  257.76   13.47
  -1   9   2  238.20   12.11
   1  -9   2  266.13   14.29
  -9  -1   2  254.46   15.03
  -9  -1   2  250.44   14.52
  -9  -1   2  225.23   11.87
  -9  -1   2  238.44   15.52
  -1   9   2  240.62   15.36
  -9   0  -2 1110.06   46.69
   0   9  -2 1125.14   46.43
   0  -9  -2 1118.36   45.96
  -9   0  -2 1168.50   46.19
   0   9  -2 1147.66   46.03
  -9   0  -2 1113.66   45.85
   0   9   2 1191.37   46.28
  -9   0   2 1150.29   45.94
  -9   0   2 1113.66   48.06
   0  -9   2 1104.96   48.32
   0   9   2 1249.00   49.09
  -9   0   2 1218.64   49.07
  -9   0   2 1162.29   49.54
   1   9  -2  562.11   25.69
  -1  -9  -2  572.45   25.68
  -9   1  -2  597.69   25.79
   1   9  -2  594.15   26.47
   1   9   2  580.88   23.87
  -9   1   2  638.59   27.33
   1   9   2  518.86   26.30
  -1  -9   2  580.49   26.63
  -9   1   2  569.82   23.29
  -9   1   2  584.55   26.16
  -9   1   2  607.99   28.07
   9  -1   2  543.38   25.07
  -2  -9  -2  244.32   14.16
  -9   2  -2  239.08   13.66
   2   9  -2  260.33   13.89
   2   9  -2  251.64   14.46
  -9   2   2  250.27   10.59
  -9   2   2  234.78   13.80
  -2  -9   2  236.69   15.18
   2   9   2  255.66   14.54
  -9   2   2  243.92   15.25
   9  -2   2  250.38   13.10
   2   9   2  245.52   11.57
   9  -3  -2  246.57   10.17
  -9   3  -2  255.71   14.09
  -9   3  -2  245.87   12.30
   3   9  -2  247.96   14.08
  -3  -9  -2  257.28   14.00
   3   9  -2  256.93   14.15
  -9   3   2  258.76   14.29
   3   9   2  233.21   14.93
  -9   3   2  239.01   15.98
  -3  -9   2  257.51   14.87
   3   9   2  251.38   11.59
   9  -3   2  255.95   13.40
   4   9  -2  179.50   12.05
   4   9  -2  183.38   11.12
  -9   4  -2  157.12    9.33
  -9   4  -2  145.67   10.91
  -4  -9  -2  169.37   11.67
   4   9   2  165.66    8.70
   4   9   2  168.90   11.82
  -9   4   2  162.64   13.41
  -9   4   2  169.45   11.25
  -4  -9   2  168.58   12.00
   9  -4   2  165.12   10.50
  -9   5  -2  729.97   29.84
   5   9  -2  693.05   31.85
  -5  -9  -2  741.90   32.03
  -9   5  -2  719.49   31.80
  -9   5   2  763.52   33.52
   5   9   2  808.22   33.94
  -5  -9   2  747.47   33.89
   5   9   2  718.88   30.84
  -9   5   2  765.92   34.63
   9  -5   2  794.26   32.70
   6   9  -2   91.65    8.64
  -9   6  -2   77.10    6.75
  -6  -9  -2   75.09    8.01
  -9   6  -2   65.64    8.18
  -6  -9   2   68.94    8.52
   6   9   2   95.79    8.92
   6   9   2   95.04    6.55
  -9   6   2  101.26   10.35
   9  -6   2  104.17    8.08
  -9   6   2   68.91    7.84
  -9   7  -2    0.96    4.31
  -7  -9  -2    4.63    4.59
  -9   7  -2    4.69    3.37
   7   9  -2    8.75    5.08
  -7  -9   2    4.92    4.81
  -9   7   2    2.36    4.81
  -9   7   2    8.58    5.32
   7   9   2    3.68    4.75
   9  -7   2    4.39    3.52
   7   9   2    3.69    3.10
  -9   8  -2  235.52   14.55
  -9   8  -2  243.55   13.06
  -8  -9  -2  252.61   14.80
   8   9  -2  250.11   15.00
  -8  -9   2  248.50   14.95
   8   9   2  250.34   12.51
   9  -8   2  247.60   13.35
  -9   8   2  250.92   14.36
  -9   8   2  239.28   16.35
   8   9   2  234.42   14.66
  -9  -9  -2   46.90    7.49
   9   9  -2   69.40    8.28
  -9   9  -2   52.73    6.21
   9  -9  -2   54.30    3.14
  -9   9  -2   34.35    6.93
   9  -9   2   45.71    6.05
  -9   9   2   45.49    8.57
  -9  -9   2   35.23    6.90
   9   9   2   48.47    7.08
  -9   9   2   46.15    6.63
   9   9   2   58.91    5.69
  10   9  -2  614.31   28.02
  -9  10  -2  576.96   28.18
 -10  -9  -2  554.68   27.71
  -9  10  -2  563.20   26.45
   9 -10  -2  596.77   23.23
  -9  10   2  576.53   29.87
  -9  10   2  598.64   27.65
  10   9   2  547.16   27.99
 -10  -9   2  633.81   28.76
   9 -10   2  595.68   26.45
  10   9   2  594.33   25.95
   8 -10  -2   97.09    5.95
  -8  10  -2  114.02   10.75
  10   8  -2  103.45    9.87
  -8  10  -2  113.83    9.09
 -10  -8  -2  111.36    9.82
  10   8   2  115.08    9.80
  10   8   2  109.59    7.96
   8 -10   2  113.03    8.69
 -10  -8   2   98.67    9.91
  -8  10   2  114.93    9.27
  -8  10   2   90.99   10.44
 -10  -7  -2   64.30    7.98
   7 -10  -2   82.92    5.48
  10   7  -2   68.37    7.80
  -7  10  -2   78.24    7.60
  -7  10  -2   83.29    8.71
  10   7   2   76.96    6.38
  -7  10   2   83.43    9.89
  -7  10   2   59.38    7.33
   7 -10   2   79.37    7.62
 -10  -7   2   74.63    8.25
  10   7   2   78.96    8.16
  -6  10  -2    4.56    4.64
  10   6  -2    5.97    4.54
 -10  -6  -2    0.99    4.04
   6 -10  -2    8.21    2.81
  -6  10  -2    0.10    3.36
 -10  -6   2    1.71    4.28
  -6  10   2   -2.17    3.86
   6 -10   2    6.22    4.20
  -6  10   2    6.21    5.59
  10   6   2    3.31    3.66
  -5  10  -2  201.40   12.93
  -5  10  -2  206.27   11.65
 -10  -5  -2  201.33   11.44
  10   5  -2  187.40   12.12
 -10  -5  -2  203.49   12.22
   5 -10  -2  191.83   10.14
  -5  10   2  209.17   14.44
   5 -10   2  214.99   12.61
  -5  10   2  200.17   11.97
 -10  -5   2  203.78   12.27
  10   4  -2   79.47    7.85
 -10  -4  -2  107.63    8.38
   4 -10  -2   79.36    6.61
  -4  10  -2   76.86    7.31
 -10  -4  -2   94.87    7.50
  -4  10  -2   91.43    8.79
  -4  10   2   75.97    8.73
   4 -10   2   90.09    8.49
  -4  10   2   83.57    7.44
 -10  -4   2   88.70    7.60
 -10  -3  -2 1331.96   53.55
   3 -10  -2 1302.56   52.35
 -10  -3  -2 1300.34   52.89
  -3  10  -2 1322.29   53.87
  -3  10  -2 1303.02   52.97
   3 -10   2 1293.08   54.17
 -10  -3   2 1301.05   53.05
 -10  -3   2 1318.71   55.26
  -3  10   2 1337.74   53.05
  -3  10   2 1310.17   55.21
 -10  -3   2 1379.39   56.72
 -10  -2  -2  190.18   12.97
 -10  -2  -2  208.18   11.84
   2 -10  -2  213.96   11.44
  -2  10  -2  208.71   11.61
  -2  10  -2  201.28   12.83
 -10  -2  -2  187.57   11.90
  -2  10   2  209.29   14.01
   2 -10   2  191.08   12.31
 -10  -2   2  177.88   12.71
 -10  -2   2  220.79   13.61
 -10  -2   2  207.34   11.09
 -10  -2   2  191.66   14.23
  -2  10   2  209.28   10.98
  -1  10  -2  482.69   22.65
   1 -10  -2  501.68   22.11
  -1  10  -2  518.50   22.31
 -10  -1  -2  450.30   23.02
 -10  -1  -2  466.77   21.76
 -10  -1  -2  485.50   22.24
 -10  -1   2  468.03   23.25
 -10  -1   2  465.25   23.59
  -1  10   2  534.76   24.13
 -10  -1   2  483.85   24.99
 -10  -1   2  477.25   20.94
   1 -10   2  476.60   23.04
  -1  10   2  499.09   21.13
 -10   0  -2   69.76    7.91
 -10   0  -2   60.55    6.86
   0  10  -2   66.97    6.88
 -10   0  -2   60.04    6.63
   0  10  -2   72.32    7.49
   0 -10  -2   65.27    7.15
 -10   0   2   62.67    7.43
   0  10   2   76.83    6.37
 -10   0   2   69.01    9.05
   0 -10   2   58.19    8.10
   0  10   2   57.81    7.44
 -10   0   2   58.16    7.70
 -10   0   2   59.42    5.12
  -1 -10  -2  112.35    9.35
 -10   1  -2  113.62   10.50
   1  10  -2  109.52    9.06
 -10   1  -2  103.06    8.65
   1  10  -2  107.00    8.44
  -1 -10   2   91.40    9.46
 -10   1   2  117.26    6.48
 -10   1   2  109.65    9.93
 -10   1   2  129.04   11.40
   1  10   2  104.21   10.00
  10  -1   2  114.09    8.16
 -10   1   2  113.82   10.58
   1  10   2  110.31    7.35
   2  10  -2   40.13    6.41
 -10   2  -2   28.88    5.96
  -2 -10  -2   39.32    6.41
   2  10  -2   24.01    5.10
 -10   2   2   26.54    7.29
 -10   2   2   35.13    3.15
   2  10   2   30.63    4.07
  10  -2   2   35.58    5.10
 -10   2   2   40.00    6.18
  -2 -10   2   30.31    6.57
 -10   2   2   32.28    6.70
   2  10   2   26.92    6.24
   3  10  -2  720.17   30.96
  10  -3  -2  716.60   27.45
   3  10  -2  715.38   31.02
 -10   3  -2  666.46   29.13
 -10   3  -2  696.46   31.14
  -3 -10  -2  700.50   31.00
   3  10   2  728.21   29.47
  -3 -10   2  726.36   32.62
 -10   3   2  699.75   32.08
 -10   3   2  764.59   33.44
  10  -3   2  766.61   31.45
   3  10   2  665.20   32.22
 -10   4  -2    8.08    3.36
 -10   4  -2    5.17    4.63
   4  10  -2    6.39    4.58
   4  10  -2   14.68    4.70
  -4 -10  -2   13.54    5.35
 -10   4   2    6.16    5.21
  10  -4   2    8.65    3.65
 -10   4   2   11.19    4.69
   4  10   2    5.59    2.86
  -4 -10   2    3.23    5.00
   4  10   2    2.29    4.35
 -10   5  -2  547.82   23.63
   5  10  -2  587.42   26.13
   5  10  -2  547.71   25.59
  -5 -10  -2  540.19   25.72
 -10   5  -2  535.30   25.59
 -10   5   2  560.83   26.17
  10  -5   2  611.65   25.47
  -5 -10   2  537.19   26.68
   5  10   2  562.36   23.63
   5  10   2  554.68   26.83
 -10   5   2  560.26   27.59
   6  10  -2  338.09   17.49
 -10   6  -2  333.28   17.74
 -10   6  -2  329.43   15.58
  -6 -10  -2  308.76   17.55
  10  -6   2  341.49   16.75
 -10   6   2  330.99   19.35
   6  10   2  317.84   18.34
  -6 -10   2  321.57   18.12
 -10   6   2  352.04   17.79
   6  10   2  331.13   15.26
 -10   7  -2  157.08   11.03
   7  10  -2  135.54   10.40
 -10   7  -2  129.32    8.84
  -7 -10  -2  130.34   10.61
 -10   7   2  137.41   12.87
   7  10   2  141.80    8.60
 -10   7   2  137.40   10.91
   7  10   2  138.13   11.72
  10  -7   2  136.26    9.30
  -7 -10   2  145.78   11.22
 -10   8  -2   28.23    6.32
   8  10  -2   22.57    6.29
  -8 -10  -2   14.82    5.56
 -10   8  -2   13.48    4.21
  10  -8   2   21.72    4.74
  -8 -10   2   19.36    6.09
 -10   8   2   12.16    6.52
   8  10   2   16.63    3.91
 -10   8   2   16.38    5.43
   8  10   2   11.80    5.29
  -9 -10  -2  240.86   15.25
   9  10  -2  242.63   14.98
 -10   9  -2  241.41   13.64
 -10   9  -2  236.22   15.21
  10  -9   2  226.20   12.99
 -10   9   2  219.24   14.79
   9  10   2  264.89   16.01
  -9 -10   2  225.36   14.87
 -10   9   2  205.94   16.49
   9  10   2  235.77   12.75
  10  10  -2    3.67    5.17
 -10  10  -2   10.74    5.79
  10 -10  -2    7.94    1.48
 -10  10  -2    5.18    4.37
 -10 -10  -2    9.27    5.68
  10 -10   2    5.96    4.25
 -10  10   2   12.73    5.65
  10  10   2    1.77    3.85
  10  10   2   15.37    5.96
 -10  10   2    1.68    6.20
 -10 -10   2    9.89    6.40
  10 -11  -2  158.97    7.52
 -10  11  -2  143.05   13.41
 -10  11  -2  162.98   11.90
  11  10  -2  160.21   13.25
 -11 -10  -2  182.88   13.32
  10 -11   2  163.84   10.67
  11  10   2  128.94   12.75
 -10  11   2  149.17   14.39
  11  10   2  153.82   10.38
 -11 -10   2  152.05   12.45
 -10  11   2  152.32   12.56
  11   9  -2   67.98    8.63
 -11  -9  -2   81.17   10.06
  -9  11  -2   85.58    8.46
   9 -11  -2   84.52    5.34
  -9  11  -2   72.66    9.47
  -9  11   2   75.96    8.62
  11   9   2   60.36    6.95
 -11  -9   2   82.66    9.26
  11   9   2   69.16    8.45
  -9  11   2   73.39    9.98
   9 -11   2   82.05    8.19
  11   8  -2  300.72   16.89
 -11  -8  -2  288.61   17.28
  -8  11  -2  292.66   17.59
  -8  11  -2  272.77   16.09
   8 -11  -2  287.95   13.06
  -8  11   2  287.54   16.66
  11   8   2  284.55   15.00
  -8  11   2  326.01   19.83
   8 -11   2  278.31   15.63
 -11  -8   2  304.38   17.28
  11   8   2  298.25   17.52
   7 -11  -2   59.18    5.22
 -11  -7  -2   51.80    7.31
  -7  11  -2   56.65    7.88
  11   7  -2   52.52    7.13
  -7  11  -2   59.79    7.04
  -7  11   2   51.77    9.00
  11   7   2   50.55    6.03
  11   7   2   70.68    8.10
  -7  11   2   63.89    7.70
   7 -11   2   58.49    7.26
 -11  -7   2   62.80    7.88
   6 -11  -2  207.85   10.14
  -6  11  -2  164.01   12.28
 -11  -6  -2  198.07   12.96
  11   6  -2  180.95   12.04
  -6  11  -2  196.98   12.03
  11   6   2  182.53   12.18
   6 -11   2  173.69   11.59
 -11  -6   2  179.75   11.88
  -6  11   2  183.95   11.38
  -6  11   2  185.42   13.64
  -5  11  -2    8.05    3.99
 -11  -5  -2    3.53    3.79
  -5  11  -2    1.69    4.99
   5 -11  -2    4.54    3.10
 -11  -5  -2    6.13    4.26
  11   5  -2    5.55    4.66
   5 -11   2    6.67    4.64
 -11  -5   2    1.50    3.82
  -5  11   2   -0.93    3.34
  -5  11   2    2.53    5.19
 -11  -4  -2  176.41   11.45
  -4  11  -2  191.03   11.62
  11   4  -2  182.55   11.91
   4 -11  -2  181.67   10.32
 -11  -4  -2  181.09   11.06
  -4  11  -2  184.24   12.00
 -11  -4   2  184.10   11.01
  -4  11   2  187.78   11.09
   4 -11   2  182.77   11.53
  -4  11   2  154.93   12.43
   3 -11  -2    9.84    3.81
  -3  11  -2    3.82    4.31
 -11  -3  -2   15.55    4.46
  -3  11  -2    7.35    3.70
 -11  -3  -2   18.51    4.59
 -11  -3  -2   17.61    5.54
  -3  11   2   13.85    5.30
 -11  -3   2    4.93    3.50
   3 -11   2   15.60    5.45
  -3  11   2    5.74    4.06
 -11  -3   2    8.49    5.14
 -11  -3   2    7.85    4.80
 -11  -3   2   -2.74    5.25
 -11  -2  -2  464.19   22.88
 -11  -2  -2  472.04   21.70
 -11  -2  -2  432.06   21.48
  -2  11  -2  479.57   22.49
  -2  11  -2  462.15   21.61
   2 -11  -2  471.43   21.27
   2 -11   2  454.69   21.96
 -11  -2   2  460.45   24.38
  -2  11   2  453.80   23.08
  -2  11   2  465.07   20.35
 -11  -2   2  435.84   21.87
 -11  -2   2  451.63   20.22
 -11  -2   2  428.56   22.74
 -11  -1  -2   57.01    6.41
 -11  -1  -2   43.67    5.94
 -11  -1  -2   38.61    7.04
  -1  11  -2   48.94    6.58
   1 -11  -2   44.93    6.02
  -1  11  -2   57.01    6.39
   1 -11   2   51.43    7.12
  -1  11   2   47.43    7.69
 -11  -1   2   54.68    9.20
 -11  -1   2   44.60    7.48
  -1  11   2   48.13    5.26
 -11  -1   2   55.44    5.16
 -11  -1   2   44.06    6.74
 -11   0  -2  554.50   25.32
 -11   0  -2  566.39   24.88
   0 -11  -2  557.58   25.34
 -11   0  -2  544.50   26.33
   0  11  -2  537.49   25.25
   0  11  -2  591.81   25.79
 -11   0   2  540.20   23.00
   0  11   2  519.15   26.05
 -11   0   2  598.24   27.72
   0  11   2  566.81   23.58
 -11   0   2  558.13   25.70
 -11   0   2  506.53   25.93
   0 -11   2  556.48   25.95
  -1 -11  -2  420.85   20.30
 -11   1  -2  385.24   20.12
   1  11  -2  410.82   20.02
   1  11  -2  424.57   20.15
 -11   1  -2  418.78   21.12
 -11   1   2  415.56   21.43
  -1 -11   2  425.56   21.23
   1  11   2  386.24   21.52
 -11   1   2  420.64   17.81
   1  11   2  423.41   18.52
  11  -1   2  404.92   19.56
 -11   1   2  442.30   21.10
 -11   1   2  433.12   22.98
  -2 -11  -2  338.71   17.92
   2  11  -2  342.47   17.56
 -11   2  -2  337.65   17.48
   2  11  -2  346.21   17.81
   2  11   2  333.32   18.70
  -2 -11   2  338.59   18.30
  11  -2   2  330.97   16.58
 -11   2   2  343.82   14.28
 -11   2   2  321.49   18.72
 -11   2   2  321.92   18.78
 -11   2   2  341.35   17.70
   2  11   2  341.72   15.28
  11  -3  -2   66.23    3.89
   3  11  -2   50.92    6.77
  -3 -11  -2   61.74    7.29
   3  11  -2   54.64    6.84
 -11   3  -2   63.75    7.27
 -11   3  -2   60.76    5.80
   3  11   2   61.76    5.33
   3  11   2   62.98    7.75
 -11   3   2   49.89    7.46
  -3 -11   2   69.88    8.35
 -11   3   2   50.74    7.80
  11  -3   2   55.81    6.32
   4  11  -2  242.96   14.13
 -11   4  -2  244.46   14.33
 -11   4  -2  241.90   12.53
  -4 -11  -2  233.01   14.11
   4  11  -2  242.59   13.99
  11  -4   2  245.86   13.40
   4  11   2  233.56   11.64
  -4 -11   2  247.74   14.99
   4  11   2  263.87   15.61
 -11   4   2  220.37   14.87
 -11   4   2  231.80   14.21
   5  11  -2  118.30   11.08
 -11   5  -2  157.11    9.28
 -11   5  -2  144.97   10.85
  -5 -11  -2  150.11   11.04
   5  11  -2  138.50   10.63
   5  11   2  114.19   11.02
 -11   5   2  135.51   10.44
  -5 -11   2  150.40   11.41
 -11   5   2  155.12   12.64
  11  -5   2  137.99    9.46
   5  11   2  117.23    7.86
 -11   6  -2  365.13   16.94
  -6 -11  -2  348.71   19.27
 -11   6  -2  324.33   18.76
   6  11  -2  360.24   19.20
   6  11  -2  382.76   19.40
 -11   6   2  365.29   20.86
   6  11   2  381.29   16.81
  -6 -11   2  344.69   19.81
 -11   6   2  356.02   19.64
  11  -6   2  376.83   18.13
   6  11   2  375.27   19.92
   7  11  -2   -0.64    4.99
  -7 -11  -2   -0.59    4.77
 -11   7  -2   -1.91    4.47
   7  11  -2   -0.17    4.88
 -11   7  -2    3.17    3.60
 -11   7   2    8.09    5.09
 -11   7   2   -2.07    4.96
   7  11   2    2.59    5.38
  11  -7   2   -7.30    3.32
  -7 -11   2    1.02    5.22
   7  11   2    1.03    3.26
 -11   8  -2  320.01   18.03
   8  11  -2  307.65   17.89
 -11   8  -2  307.05   15.79
  -8 -11  -2  318.75   18.14
 -11   8   2  321.20   20.24
   8  11   2  325.19   18.72
 -11   8   2  325.74   18.18
  -8 -11   2  310.91   18.76
   8  11   2  326.86   15.82
  11  -8   2  331.50   16.52
   9  11  -2  161.32   13.03
  -9 -11  -2  157.89   12.66
 -11   9  -2  145.30   12.26
 -11   9  -2  166.46   10.99
   9  11   2  168.63   14.08
 -11   9   2  170.84   13.33
   9  11   2  181.90   10.64
 -11   9   2  168.48   15.27
  -9 -11   2  163.04   13.19
  11  -9   2  175.21   11.18
 -11  10  -2   47.32    6.79
  10  11  -2   54.82    8.44
 -10 -11  -2   50.43    8.41
 -11  10  -2   56.89    8.92
  10  11   2   51.84    6.60
  11 -10   2   47.02    6.72
 -10 -11   2   47.22    8.27
 -11  10   2   68.96   10.35
  10  11   2   46.24    8.50
 -11  10   2   70.97    8.96
  11  11  -2   13.75    6.88
 -11  11  -2   17.79    7.08
 -11 -11  -2   18.75    6.88
 -11  11  -2   18.83    5.54
 -11 -11   2   12.59    6.69
  11  11   2   14.77    5.11
  11  11   2   11.96    7.26
 -11  11   2   28.81    7.72
  11 -11   2   14.91    5.14
 -11  11   2    6.90    7.40
 -12 -11  -2  208.74   15.02
 -11  12  -2  190.67   13.14
 -11  12  -2  177.43   15.32
  12  11  -2  181.11   14.76
  12  11   2  200.78   12.94
  11 -12   2  201.86   13.12
  12  11   2  203.43   16.18
 -11  12   2  190.18   14.86
 -12 -11   2  198.83   14.84
 -11  12   2  204.19   17.64
 -12 -10  -2   24.23    7.13
 -10  12  -2   32.21    7.88
 -10  12  -2   19.34    5.99
  12  10  -2   25.23    7.37
  10 -12  -2   25.02    3.16
 -12 -10   2   15.98    6.55
 -10  12   2   18.92    8.07
 -10  12   2   13.78    6.75
  10 -12   2   31.74    6.24
  12  10   2   18.72    6.58
  12  10   2   23.76    5.50
 -12  -9  -2   41.67    8.03
  -9  12  -2   47.38    8.83
  12   9  -2   41.93    8.10
   9 -12  -2   51.67    4.64
  -9  12  -2   36.87    6.74
  12   9   2   60.41    6.92
  -9  12   2   60.52    8.09
  -9  12   2   54.02    9.90
  12   9   2   60.39    8.64
   9 -12   2   35.55    6.76
 -12  -9   2   45.03    8.19
  -8  12  -2  229.92   15.03
  12   8  -2  233.28   15.10
 -12  -8  -2  264.76   15.86
  -8  12  -2  241.93   15.90
   8 -12  -2  258.03   12.07
  -8  12   2  243.66   18.13
  12   8   2  240.86   13.62
   8 -12   2  244.12   14.27
 -12  -8   2  238.19   15.47
  12   8   2  211.48   14.98
  -8  12   2  275.91   15.24
 -12  -7  -2  146.53   12.20
   7 -12  -2  143.11    8.68
  12   7  -2  160.21   11.48
  -7  12  -2  149.30   11.93
  -7  12  -2  137.42   11.18
   7 -12   2  128.17   10.76
  12   7   2  166.22   10.10
  -7  12   2  142.88   10.85
  12   7   2  162.48   12.38
  -7  12   2  164.34   14.62
 -12  -7   2  138.81   10.89
  -6  12  -2  220.09   14.76
  -6  12  -2  233.12   14.41
  12   6  -2  253.57   15.02
 -12  -6  -2  253.76   14.01
   6 -12  -2  251.77   12.53
   6 -12   2  242.08   14.16
  -6  12   2  237.85   14.08
  -6  12   2  235.21   16.66
 -12  -6   2  228.64   13.79
   5 -12  -2  199.07   10.95
 -12  -5  -2  185.25   12.49
  -5  12  -2  209.07   12.76
  -5  12  -2  190.40   13.00
 -12  -5  -2  195.18   12.07
  12   5  -2  195.48   12.46
   5 -12   2  186.08   12.57
  -5  12   2  191.47   12.18
  -5  12   2  205.85   15.05
 -12  -5   2  203.08   12.25
 -12  -4  -2  448.32   20.69
  -4  12  -2  414.20   20.87
   4 -12  -2  461.86   19.96
  12   4  -2  422.70   20.90
  -4  12  -2  408.49   21.29
 -12  -4  -2  400.22   20.64
  -4  12   2  459.26   21.15
 -12  -4   2  443.41   21.07
  -4  12   2  439.00   23.30
   4 -12   2  440.28   22.01
  -3  12  -2  268.55   15.11
 -12  -3  -2  265.25   16.58
   3 -12  -2  272.19   14.21
  -3  12  -2  270.35   15.86
 -12  -3  -2  283.37   15.01
 -12  -3  -2  282.69   15.05
 -12  -3   2  271.20   17.86
 -12  -3   2  273.92   13.93
 -12  -3   2  265.98   15.60
   3 -12   2  251.99   15.47
  -3  12   2  275.72   14.16
  -3  12   2  262.84   16.41
 -12  -2  -2    1.43    3.98
   2 -12  -2    2.68    3.89
  -2  12  -2    3.68    3.82
 -12  -2  -2   11.87    4.09
 -12  -2  -2    7.58    5.40
  -2  12  -2    0.67    4.23
 -12  -2   2   12.07    5.59
  -2  12   2   -0.66    3.41
  -2  12   2    6.22    5.23
 -12  -2   2   -3.90    2.64
 -12  -2   2   -1.12    4.41
   2 -12   2    4.17    4.60
 -12  -2   2   -3.27    5.48
 -12  -1  -2  136.55    9.57
  -1  12  -2  133.30   10.08
   1 -12  -2  122.03    9.62
  -1  12  -2  141.08   10.29
 -12  -1  -2  126.14    9.91
 -12  -1  -2  136.05   11.44
   1 -12   2  143.10   10.80
 -12  -1   2  142.19   10.68
 -12  -1   2  138.05   13.13
 -12  -1   2  136.42    8.28
  -1  12   2  132.52   12.13
 -12  -1   2  114.40   11.19
  -1  12   2  135.08    8.68
   0  12  -2  734.08   33.34
   0 -12  -2  766.91   32.99
 -12   0  -2  751.26   33.11
   0  12  -2  727.82   33.12
 -12   0  -2  739.70   34.15
 -12   0  -2  808.15   32.60
   0  12   2  766.70   31.77
 -12   0   2  759.69   34.18
 -12   0   2  750.05   31.17
   0 -12   2  798.51   34.65
   0  12   2  715.92   34.66
 -12   0   2  762.21   34.54
 -12   0   2  772.65   35.82
 -12   1  -2  591.35   26.97
  -1 -12  -2  557.36   26.50
   1  12  -2  562.84   26.54
 -12   1  -2  575.66   27.74
   1  12  -2  619.00   27.13
 -12   1   2  623.81   29.29
   1  12   2  622.10   25.95
  -1 -12   2  639.32   28.88
 -12   1   2  583.38   25.02
 -12   1   2  596.32   28.40
  12  -1   2  599.98   27.12
 -12   1   2  605.45   29.81
   1  12   2  595.16   28.95
   2  12  -2   82.59    8.42
  -2 -12  -2   90.67    8.69
   2  12  -2   67.78    7.61
 -12   2  -2  110.75    9.67
   2  12   2   84.50    9.71
 -12   2   2   94.55    5.68
  -2 -12   2   88.34    9.53
  12  -2   2   83.28    7.86
 -12   2   2   95.78    9.23
 -12   2   2   75.59    8.79
   2  12   2   93.09    7.01
 -12   2   2   91.15   10.41
   3  12  -2  260.80   14.78
  12  -3  -2  261.03   10.98
 -12   3  -2  228.90   14.67
  -3 -12  -2  225.46   14.45
 -12   3  -2  247.88   13.28
   3  12  -2  249.22   14.44
 -12   3   2  242.73   14.96
   3  12   2  243.64   12.00
  12  -3   2  238.24   13.27
  -3 -12   2  209.61   14.74
 -12   3   2  219.18   16.02
 -12   3   2  238.88   15.93
   3  12   2  253.30   15.93
 -12   4  -2  154.14   11.00
  -4 -12  -2  147.41   10.97
 -12   4  -2  130.67    9.20
   4  12  -2  150.45   11.23
   4  12  -2  115.05   10.48
   4  12   2  138.52   12.36
 -12   4   2  141.89   12.85
 -12   4   2  122.62   10.69
  -4 -12   2  156.57   12.69
  12  -4   2  139.90    9.54
   4  12   2  135.25    8.45
 -12   5  -2  199.64   11.69
   5  12  -2  209.99   13.63
  -5 -12  -2  193.05   13.46
   5  12  -2  224.43   13.38
 -12   5  -2  196.84   13.45
   5  12   2  210.96   11.26
  -5 -12   2  194.12   14.36
   5  12   2  219.00   14.66
 -12   5   2  229.41   15.76
 -12   5   2  223.12   14.62
  12  -5   2  225.42   12.81
 -12   6  -2   92.02    9.91
   6  12  -2   84.33    9.27
 -12   6  -2  118.86    8.54
  -6 -12  -2  114.39   10.76
   6  12  -2  103.75   10.52
   6  12   2   92.77   10.76
 -12   6   2  106.47   11.53
  -6 -12   2   98.84   10.58
 -12   6   2  100.00   10.02
  12  -6   2  111.86    8.85
   6  12   2  117.99    7.89
   7  12  -2  230.61   14.40
 -12   7  -2  209.10   14.38
   7  12  -2  218.91   14.66
 -12   7  -2  207.42   12.31
  -7 -12  -2  225.24   14.83
 -12   7   2  194.82   16.13
   7  12   2  245.16   12.23
  12  -7   2  229.50   13.00
  -7 -12   2  188.42   15.41
   7  12   2  254.32   15.76
 -12   7   2  216.16   15.12
   8  12  -2  174.70   14.00
  -8 -12  -2  161.46   13.08
 -12   8  -2  174.20   11.23
 -12   8  -2  179.95   13.25
   8  12  -2  151.22   13.14
   8  12   2  196.68   11.15
  -8 -12   2  195.92   14.26
   8  12   2  142.00   13.22
  12  -8   2  183.09   11.43
 -12   8   2  174.35   15.62
 -12   8   2  184.91   13.98
 -12   9  -2  332.77   17.53
   9  12  -2  370.96   20.26
  -9 -12  -2  325.55   19.88
   9  12  -2  350.28   19.84
  -9 -12   2  337.80   20.63
 -12   9   2  346.63   22.17
 -12   9   2  349.08   20.06
   9  12   2  364.25   21.44
   9  12   2  391.99   17.87
  12  -9   2  348.49   17.99
 -12  10  -2   34.03    8.09
 -10 -12  -2   37.15    8.16
  10  12  -2   41.85    7.71
 -12  10  -2   38.84    6.36
 -10 -12   2   40.21    8.95
 -12  10   2   47.41    9.68
 -12  10   2   39.81    8.01
  10  12   2   42.37    6.19
  12 -10   2   51.61    6.59
  10  12   2   33.23    8.39
 -12  11  -2  125.87   11.36
 -12  11  -2  140.03   14.12
  11  12  -2  179.86   14.04
 -11 -12  -2  127.38   13.13
 -12  11   2  144.42   14.69
  12 -11   2  133.60   10.46
  11  12   2  168.66   11.05
 -11 -12   2  126.03   13.17
 -12  11   2  151.42   13.81
  11  12   2  155.89   14.41
 -12  12  -2    7.97    5.60
  12  12  -2   10.29    6.38
 -12 -12  -2   25.06    7.78
 -12  12  -2    3.68    6.38
  12  12   2   18.31    5.86
 -12  12   2   12.02    7.24
  12 -12   2    7.47    5.10
 -12  12   2    4.94    8.07
  12  12   2    9.57    7.22
 -12 -12   2    4.74    6.48
 -12  13  -2  153.31   14.18
 -13 -12  -2  174.51   14.84
 -12  13  -2  184.57   13.33
  13  12  -2  184.62   15.33
 -12  13   2  166.10   14.60
 -13 -12   2  167.65   15.14
  13  12   2  144.19   11.97
  12 -13   2  175.58   11.71
  13  12   2  160.74   15.32
 -12  13   2  160.06   16.31
 -11  13  -2    9.11    5.44
 -11  13  -2    5.99    6.52
 -13 -11  -2   -0.70    6.94
  13  11  -2   -4.12    5.35
  11 -13   2    7.95    5.24
 -13 -11   2   15.26    6.92
  13  11   2    5.82    7.14
 -11  13   2   13.47    8.09
 -11  13   2    5.53    6.50
  13  11   2   -3.88    4.48
 -10  13  -2  219.29   14.86
 -10  13  -2  226.68   16.10
 -13 -10  -2  213.01   16.43
  13  10  -2  226.81   15.19
  13  10   2  258.06   17.43
 -13 -10   2  218.10   15.84
  13  10   2  255.30   14.30
  10 -13   2  246.87   14.68
 -10  13   2  227.00   16.10
 -10  13   2  223.69   18.78
  -9  13  -2   13.09    5.96
 -13  -9  -2    1.10    5.67
   9 -13  -2    6.34    3.23
  -9  13  -2    7.70    6.41
  13   9  -2   11.13    6.44
  -9  13   2    4.25    5.52
  -9  13   2   -1.54    7.05
  13   9   2   11.58    5.00
   9 -13   2    7.59    5.39
  13   9   2   18.06    6.35
 -13  -9   2   16.81    6.27
  13   8  -2   78.77    9.75
   8 -13  -2   75.36    6.26
  -8  13  -2   55.90    9.61
 -13  -8  -2   58.67    8.80
  -8  13  -2   61.25    8.46
  -8  13   2   60.52    8.70
  13   8   2   73.47    7.63
  13   8   2   70.62    9.46
 -13  -8   2   48.98    7.91
   8 -13   2   64.98    8.03
  -8  13   2   65.01   10.92
   7 -13  -2 1116.38   44.51
  13   7  -2 1098.56   47.35
  -7  13  -2 1062.49   46.89
 -13  -7  -2 1087.47   47.45
  -7  13  -2 1120.48   47.89
  13   7   2 1166.12   49.91
  -7  13   2 1171.47   51.74
  13   7   2 1129.54   48.00
 -13  -7   2 1157.82   49.35
   7 -13   2 1156.64   49.00
  -7  13   2 1185.95   49.40
 -13  -6  -2  169.50   11.51
   6 -13  -2  154.02    9.90
  -6  13  -2  169.52   12.45
 -13  -6  -2  156.70   12.07
  13   6  -2  155.32   12.34
  -6  13  -2  172.14   12.80
  -6  13   2  174.18   15.00
   6 -13   2  177.19   12.46
  -6  13   2  159.67   11.82
 -13  -6   2  157.89   12.04
 -13  -5  -2   29.02    6.15
   5 -13  -2   25.48    4.82
  -5  13  -2   37.57    6.97
 -13  -5  -2   28.53    6.11
  -5  13  -2   36.51    6.35
  13   5  -2   36.14    6.97
   5 -13   2   21.92    6.45
  -5  13   2   30.30    6.11
 -13  -5   2   26.76    5.97
  -5  13   2   44.84    8.46
   4 -13  -2  357.33   18.43
 -13  -4  -2  407.81   19.84
 -13  -4  -2  414.11   20.05
  -4  13  -2  370.85   20.35
  -4  13  -2  401.41   20.12
  -4  13   2  416.69   22.44
  -4  13   2  382.15   19.57
 -13  -4   2  417.54   19.69
   4 -13   2  394.27   20.55
 -13  -3  -2  143.83   10.86
  -3  13  -2  141.29   10.79
 -13  -3  -2  131.38   12.56
 -13  -3  -2  148.21   11.01
  -3  13  -2  141.69   11.77
   3 -13  -2  168.74   10.42
  -3  13   2  169.81   13.83
   3 -13   2  158.26   12.31
  -3  13   2  154.65   10.28
 -13  -3   2  147.13   10.05
 -13  -3   2  162.54   14.32
 -13  -3   2  132.00   11.38
  -2  13  -2  221.13   13.88
 -13  -2  -2  243.09   15.49
 -13  -2  -2  217.23   13.29
   2 -13  -2  220.41   13.19
  -2  13  -2  232.22   13.89
 -13  -2  -2  205.65   13.36
 -13  -2   2  205.43   17.00
 -13  -2   2  211.28   14.89
 -13  -2   2  224.65   14.89
 -13  -2   2  228.50   12.32
  -2  13   2  237.74   12.95
  -2  13   2  228.51   15.79
   2 -13   2  224.75   14.25
   1 -13  -2    5.64    4.88
 -13  -1  -2   15.64    5.94
  -1  13  -2    7.37    4.89
 -13  -1  -2   11.02    5.14
 -13  -1  -2   12.56    4.76
  -1  13  -2   10.31    4.69
   1 -13   2   10.59    5.33
  -1  13   2    5.68    3.73
 -13  -1   2   14.49    7.55
 -13  -1   2   14.71    6.24
 -13  -1   2    9.54    3.40
 -13  -1   2    2.37    5.76
  -1  13   2   12.73    5.58
 -13   0  -2  115.83   11.41
   0  13  -2  127.53   10.43
 -13   0  -2  119.46    9.36
   0 -13  -2  123.33    9.70
   0  13  -2  132.52   10.29
 -13   0  -2  113.73   10.36
 -13   0   2  125.50   11.41
 -13   0   2  120.83   11.62
   0  13   2  135.93   12.58
 -13   0   2  137.34   12.91
   0 -13   2  112.60   10.91
   0  13   2  115.91    8.39
 -13   0   2  129.54    7.82
  -1 -13  -2  358.26   18.60
   1  13  -2  341.05   18.87
 -13   1  -2  366.32   20.37
 -13   1  -2  352.36   18.67
   1  13  -2  345.37   18.78
  13  -1   2  324.32   17.42
 -13   1   2  341.85   15.48
 -13   1   2  372.09   20.24
 -13   1   2  335.59   18.76
   1  13   2  299.68   19.19
   1  13   2  352.42   16.58
 -13   1   2  360.00   20.85
  -1 -13   2  365.84   19.48
  -2 -13  -2  223.59   14.77
   2  13  -2  252.64   14.99
 -13   2  -2  212.39   14.58
   2  13  -2  241.93   14.16
 -13   2  -2  228.60   16.11
 -13   2   2  249.46   17.05
 -13   2   2  242.57   15.75
 -13   2   2  254.78   15.82
   2  13   2  266.77   16.96
  13  -2   2  248.40   13.78
   2  13   2  242.73   12.59
  -2 -13   2  240.05   15.58
 -13   2   2  227.56   11.31
  -3 -13  -2   38.30    7.01
   3  13  -2   39.22    7.22
   3  13  -2   58.86    7.88
  13  -3  -2   41.14    3.74
 -13   3  -2   39.73    7.47
   3  13   2   36.20    7.14
 -13   3   2   48.67    8.27
  -3 -13   2   34.47    7.46
  13  -3   2   41.26    6.15
 -13   3   2   27.73    6.51
 -13   3   2   40.99    8.65
   3  13   2   43.34    5.11
 -13   4  -2  389.39   20.65
 -13   4  -2  406.57   18.57
  13  -4  -2  370.73   15.23
  -4 -13  -2  358.19   20.10
   4  13  -2  387.57   20.14
   4  13  -2  362.20   20.10
 -13   4   2  387.73   20.83
   4  13   2  411.16   21.81
 -13   4   2  369.20   21.98
   4  13   2  386.94   17.85
  13  -4   2  401.10   19.36
  -4 -13   2  373.32   21.28
   5  13  -2   86.62    9.55
   5  13  -2   74.34    9.11
 -13   5  -2   92.76    9.87
 -13   5  -2   93.57    8.31
  -5 -13  -2   84.09    9.63
 -13   5   2   87.41   10.18
  13  -5   2   91.60    8.01
  -5 -13   2   91.72   11.14
   5  13   2  106.08    7.63
   5  13   2   70.30    9.38
 -13   5   2   94.62   11.03
   6  13  -2  185.10   12.91
 -13   6  -2  179.66   11.26
 -13   6  -2  187.42   13.57
  -6 -13  -2  180.10   13.48
   6  13  -2  205.98   14.50
   6  13   2  188.71   10.80
   6  13   2  164.97   14.05
  -6 -13   2  181.60   14.31
  13  -6   2  204.67   12.02
 -13   6   2  196.07   13.80
 -13   6   2  187.76   15.35
   7  13  -2    6.44    5.58
  -7 -13  -2   11.12    6.35
   7  13  -2   19.18    6.72
 -13   7  -2   -2.51    6.23
 -13   7  -2   10.02    4.40
  13  -7   2   12.43    4.67
 -13   7   2    4.73    6.84
 -13   7   2    7.55    5.86
  -7 -13   2   19.32    7.20
   7  13   2    9.69    6.96
   7  13   2    9.83    4.16
   8  13  -2  424.15   23.29
 -13   8  -2  423.43   23.91
 -13   8  -2  428.36   20.99
   8  13  -2  460.65   24.49
  -8 -13  -2  458.99   23.94
 -13   8   2  468.00   25.10
  13  -8   2  463.92   21.07
   8  13   2  418.26   24.16
  -8 -13   2  420.36   23.77
   8  13   2  415.32   19.97
 -13   8   2  402.22   22.82
   9  13  -2  109.20   11.61
  -9 -13  -2   99.27   11.32
   9  13  -2   82.00   10.56
 -13   9  -2   89.07   10.94
 -13   9  -2   95.66    8.76
 -13   9   2  106.33   12.72
  13  -9   2   98.67    8.92
   9  13   2   89.12   10.80
 -13   9   2   97.92   11.00
  -9 -13   2   93.04   11.42
   9  13   2  105.48    9.03
  10  13  -2   39.17    8.41
 -13  10  -2   34.30    6.24
  10  13  -2   44.22    9.31
 -10 -13  -2   36.06    9.31
 -13  10  -2   35.56    8.23
 -10 -13   2   44.71    9.59
  10  13   2   35.95    8.26
 -13  10   2   38.39    9.77
  10  13   2   44.30    6.51
 -13  10   2   38.27    8.11
  13 -10   2   43.49    6.57
  11  13  -2   18.13    7.89
  11  13  -2   10.96    6.99
 -13  11  -2   18.77    7.12
 -11 -13  -2    1.95    7.59
 -13  11  -2    5.09    5.02
 -13  11   2   21.15    8.37
  13 -11   2    2.43    4.63
  11  13   2   13.72    8.01
 -11 -13   2    9.96    7.18
 -13  11   2   21.29    7.95
  11  13   2   13.21    5.06
 -13  12  -2  209.16   14.67
  12  13  -2  241.05   17.17
  12  13  -2  252.49   17.61
 -12 -13  -2  273.60   18.60
 -13  12  -2  214.74   17.36
  12  13   2  241.54   15.02
 -12 -13   2  263.54   17.99
 -13  12   2  224.32   17.51
  12  13   2  297.62   19.79
  13 -12   2  256.30   14.55
 -13  12   2  248.83   19.85
 -13 -13  -2   20.04    8.70
  13  13  -2    3.27    6.36
 -13  13  -2   13.51    6.06
 -13  13  -2   18.44    8.07
  13  13  -2    6.85    7.25
  13  13   2    6.36    7.79
 -13  13   2   17.98    8.89
  13 -13   2   10.79    5.18
 -13 -13   2    9.85    7.12
 -13  13   2    7.14    7.58
  13  13   2   10.77    5.65
 -13  14  -2   48.90    8.19
 -14 -13  -2   66.50   11.15
  14  13  -2   55.27   10.29
 -13  14  -2   81.34   11.11
  14  13   2   86.86    9.52
 -13  14   2   71.16   12.40
  13 -14   2   74.80    8.52
 -13  14   2   75.04   10.50
  14  13   2   55.74   10.34
 -14 -13   2   57.26   10.13
  14  12  -2   34.49    9.11
 -14 -12  -2   48.52    9.56
 -12  14  -2   52.15    8.08
 -12  14  -2   42.37    9.73
  14  12   2   34.74    8.67
  12 -14   2   47.44    7.31
 -12  14   2   34.42    8.03
 -14 -12   2   44.59    9.74
 -12  14   2   48.10   10.46
  14  12   2   42.20    7.40
 -11  14  -2  190.20   14.70
  14  11  -2  213.19   15.18
 -11  14  -2  191.12   15.50
 -14 -11  -2  203.02   15.62
  14  11   2  186.97   15.49
  11 -14   2  202.90   13.08
 -11  14   2  199.30   18.10
 -14 -11   2  181.02   15.57
  14  11   2  192.06   13.15
 -11  14   2  182.34   14.20
 -14 -10  -2    6.10    6.51
  14  10  -2    6.67    6.69
 -10  14  -2    0.49    5.20
 -10  14  -2   -2.64    6.59
  14  10   2    2.43    4.97
 -14 -10   2    3.08    6.87
  10 -14   2    1.83    4.97
  14  10   2    4.97    5.80
 -10  14   2    9.24    7.95
 -10  14   2    1.96    5.37
 -14  -9  -2  148.08   13.90
  14   9  -2  159.47   12.64
  -9  14  -2  150.15   12.84
   9 -14  -2  131.74    8.80
  -9  14  -2  166.18   13.52
  -9  14   2  146.25   15.19
 -14  -9   2  130.31   12.95
   9 -14   2  143.42   11.69
  14   9   2  144.25   11.15
  -9  14   2  129.96   12.49
  14   9   2  126.55   12.88
  14   8  -2  197.10   14.60
  -8  14  -2  189.63   14.47
  -8  14  -2  201.83   14.86
   8 -14  -2  192.17   10.92
 -14  -8  -2  200.20   15.17
  14   8   2  194.57   12.44
 -14  -8   2  181.96   13.49
  14   8   2  189.48   14.27
   8 -14   2  185.23   13.58
  -8  14   2  201.54   13.56
  -8  14   2  196.64   17.30
   7 -14  -2  269.61   13.83
  -7  14  -2  256.35   16.62
 -14  -7  -2  248.00   16.23
  14   7  -2  250.72   16.49
  -7  14  -2  267.76   17.46
  14   7   2  231.48   16.05
  14   7   2  259.95   14.32
 -14  -7   2  226.30   14.76
   7 -14   2  226.41   15.41
  -7  14   2  229.68   18.19
  -7  14   2  249.15   15.47
   6 -14  -2   78.92    7.36
  -6  14  -2   79.52    9.20
 -14  -6  -2   69.39    8.32
  -6  14  -2   65.80    9.13
 -14  -6  -2   77.23    9.73
  14   6  -2   67.62    8.81
  -6  14   2   66.15    7.90
   6 -14   2   79.80    9.32
  -6  14   2   56.14    9.79
 -14  -6   2   65.78    8.39
  -5  14  -2   94.40   10.37
 -14  -5  -2  101.71    9.83
  14   5  -2  124.01   11.56
  -5  14  -2  122.56   11.11
 -14  -5  -2  103.95   10.48
   5 -14  -2  111.91    8.95
   5 -14   2   83.75    9.38
  -5  14   2   91.26   11.59
 -14  -5   2  106.51    9.33
  -5  14   2   95.72    9.36
 -14  -4  -2   45.69    7.19
   4 -14  -2   55.66    7.00
 -14  -4  -2   57.41    7.92
  -4  14  -2   57.23    8.95
  -4  14  -2   73.76    8.43
  -4  14   2   54.42    9.45
   4 -14   2   45.52    7.57
 -14  -4   2   69.64    7.42
  -4  14   2   55.07    7.26
 -14  -3  -2  144.80   11.07
  -3  14  -2  133.74   11.17
  -3  14  -2  146.21   11.19
 -14  -3  -2  128.15   10.79
   3 -14  -2  114.74    9.82
 -14  -3  -2  124.14   12.83
  -3  14   2  128.78   10.31
 -14  -3   2  135.38   14.81
 -14  -3   2  125.34   11.34
   3 -14   2  125.73   11.08
 -14  -3   2  134.53    9.44
  -3  14   2  148.29   13.74
 -14  -2  -2   44.16    6.77
   2 -14  -2   51.09    7.06
 -14  -2  -2   45.81    7.21
 -14  -2  -2   31.77    7.96
  -2  14  -2   37.15    6.66
  -2  14  -2   30.63    7.16
 -14  -2   2   39.72    5.46
 -14  -2   2   39.72    8.21
 -14  -2   2   39.15    9.12
  -2  14   2   43.42    8.45
   2 -14   2   44.00    7.46
  -2  14   2   34.67    5.97
 -14  -2   2   41.63    7.69
  -1  14  -2  349.60   19.80
 -14  -1  -2  392.14   21.46
 -14  -1  -2  357.39   18.64
 -14  -1  -2  363.23   19.68
  -1  14  -2  364.61   19.65
   1 -14  -2  386.24   19.59
 -14  -1   2  378.04   20.19
 -14  -1   2  365.79   17.04
  -1  14   2  375.33   17.80
 -14  -1   2  342.28   20.68
  -1  14   2  347.37   20.67
   1 -14   2  328.79   20.01
 -14  -1   2  356.99   22.03
 -14   0  -2   78.41    8.75
   0 -14  -2   73.27    8.71
   0  14  -2   60.41    7.86
 -14   0  -2   65.95    9.37
   0  14  -2   79.99    9.24
 -14   0   2   68.45    6.20
 -14   0   2   62.19   10.18
   0 -14   2   51.49    8.41
   0  14   2   58.60    8.86
   0  14   2   76.42    7.09
 -14   0   2   48.92    8.41
 -14   0   2   55.31    8.82
 -14   1  -2  339.72   18.56
   1  14  -2  349.07   18.84
  -1 -14  -2  323.79   18.21
   1  14  -2  337.29   18.94
 -14   1  -2  334.84   20.27
 -14   1   2  331.94   18.93
  -1 -14   2  296.12   19.22
 -14   1   2  370.34   21.45
   1  14   2  339.00   16.32
 -14   1   2  326.55   15.24
  14  -1   2  332.18   17.32
 -14   1   2  321.36   19.29
   1  14   2  328.07   19.55
 -14   2  -2    4.21    5.93
  -2 -14  -2   -0.57    4.97
   2  14  -2   -1.34    5.27
 -14   2  -2    6.29    5.17
   2  14  -2    1.44    4.29
 -14   2   2    0.44    6.74
  14  -2   2    8.19    3.87
 -14   2   2    2.73    5.94
   2  14   2    0.25    3.74
 -14   2   2   -0.31    5.92
  -2 -14   2    0.84    5.63
   2  14   2   -1.07    5.97
 -14   2   2    2.47    2.71
  -3 -14  -2   82.90    9.62
   3  14  -2  102.85    9.97
  14  -3  -2   92.05    5.78
 -14   3  -2   97.72   10.78
   3  14  -2   84.61    9.54
 -14   3   2   87.82    9.80
 -14   3   2   84.93   11.41
  14  -3   2   99.08    8.55
  -3 -14   2   80.41   10.21
   3  14   2   95.87   11.32
 -14   3   2   85.83   10.57
   3  14   2   96.17    7.85
 -14   4  -2   45.38    6.07
  14  -4  -2   38.13    3.37
 -14   4  -2   61.77    8.89
   4  14  -2   34.97    7.05
   4  14  -2   44.10    7.47
  -4 -14  -2   48.47    8.05
 -14   4   2   49.24    8.98
 -14   4   2   31.38    9.37
  -4 -14   2   53.75    8.88
   4  14   2   34.70    7.68
 -14   4   2   35.71    7.45
  14  -4   2   53.46    6.95
   4  14   2   44.21    5.50
 -14   5  -2   42.89    6.32
 -14   5  -2   50.50    8.21
  -5 -14  -2   46.77    8.19
   5  14  -2   36.17    7.49
   5  14  -2   35.39    7.43
   5  14   2   48.46    5.68
  -5 -14   2   44.16    8.74
  14  -5   2   50.92    6.80
 -14   5   2   39.89    7.58
 -14   5   2   40.65    8.82
   5  14   2   43.88    8.27
   6  14  -2   22.15    6.78
 -14   6  -2   13.88    4.96
 -14   6  -2    3.65    5.93
  -6 -14  -2   23.38    7.86
   6  14  -2    7.57    5.81
 -14   6   2   11.43    7.36
   6  14   2   13.52    4.26
   6  14   2   12.36    6.58
  -6 -14   2    8.90    6.81
  14  -6   2    8.98    4.89
 -14   6   2   10.66    6.24
  -7 -14  -2  102.73   11.62
 -14   7  -2  104.63    9.44
   7  14  -2  103.83   10.59
   7  14  -2  121.87   11.96
 -14   7  -2  117.56   11.93
  14  -7   2  117.45    9.38
  -7 -14   2  106.90   12.04
   7  14   2  111.80   11.91
 -14   7   2  109.59   11.54
   7  14   2  120.88    9.05
 -14   7   2  113.40   12.52
   8  14  -2   -8.93    5.05
  -8 -14  -2    7.09    7.14
   8  14  -2    7.25    6.62
 -14   8  -2    1.06    4.38
 -14   8  -2    2.20    6.14
 -14   8   2   -0.27    6.65
   8  14   2   -2.29    6.10
  14  -8   2   -2.64    3.91
 -14   8   2   -3.80    6.91
  -8 -14   2   -6.25    6.33
   8  14   2   -1.13    4.01
   9  14  -2  197.81   15.66
 -14   9  -2  201.19   15.53
   9  14  -2  219.58   15.63
  -9 -14  -2  207.28   15.70
 -14   9  -2  196.22   12.96
   9  14   2  244.31   12.95
 -14   9   2  203.24   15.50
  14  -9   2  190.95   12.63
  -9 -14   2  212.22   16.34
 -14   9   2  221.97   18.46
   9  14   2  238.18   17.01
 -10 -14  -2   -1.17    6.74
 -14  10  -2   -1.76    6.14
  10  14  -2    5.41    6.89
 -14  10  -2    2.90    4.92
  10  14  -2   -4.83    5.63
 -14  10   2    5.47    7.56
 -10 -14   2   14.60    8.20
 -14  10   2    5.34    7.18
  10  14   2    4.48    6.41
  10  14   2    9.59    5.10
  14 -10   2   -1.06    4.42
 -11 -14  -2  106.13   12.71
 -14  11  -2  134.81   10.95
 -14  11  -2  132.42   13.49
  11  14  -2  116.45   12.70
  11  14  -2  118.08   12.70
 -14  11   2  113.10   12.26
  11  14   2  142.18   10.46
 -14  11   2  108.62   13.96
  11  14   2  131.46   13.87
  14 -11   2  114.74    9.75
 -11 -14   2   94.20   12.45
  12  14  -2  205.66   17.80
 -14  12  -2  209.82   14.21
  12  14  -2  211.40   16.31
 -14  12  -2  222.01   16.80
 -12 -14  -2  214.31   16.82
 -14  12   2  225.10   19.00
  12  14   2  218.91   14.02
  14 -12   2  194.68   12.83
 -14  12   2  196.10   15.69
  12  14   2  185.25   16.44
 -12 -14   2  212.42   16.55
 -14  13  -2  121.80   14.26
 -13 -14  -2  144.76   14.93
 -14  13  -2  127.32   11.52
  13  14  -2  132.84   13.74
  13  14  -2  140.35   14.32
  13  14   2  151.36   11.98
 -13 -14   2  134.90   14.50
  13  14   2  141.97   15.21
 -14  13   2  118.95   14.92
 -14  13   2  155.25   14.85
 -14 -14  -2   40.31    9.66
 -14  14  -2   26.23    8.68
  14  14  -2   23.02    8.61
  14  14  -2   34.37    8.92
 -14  14   2   39.74   10.38
 -14 -14   2   34.79    9.84
  14  14   2   31.64    9.73
  14  14   2   17.90    6.26
 -14  14   2   41.13    9.02
  15  14  -2   77.98   11.91
 -14  15  -2   86.20   12.12
  15  14  -2   71.07   11.36
 -15 -14  -2   75.76   11.64
 -15 -14   2   66.76   11.28
 -14  15   2   82.22   12.05
 -14  15   2   76.20   12.94
  15  14   2   78.87   12.63
  15  14   2   77.23    9.72
  15  13  -2    2.41    6.58
 -13  15  -2    5.46    6.98
 -15 -13  -2    3.56    7.02
 -13  15  -2   -0.63    5.70
 -13  15   2   12.46    8.44
 -15 -13   2    6.73    6.92
  15  13   2   -2.42    7.21
 -13  15   2   -7.02    5.56
  15  13   2   -3.38    5.35
  15  12  -2   79.11   11.23
 -12  15  -2   60.60    8.81
 -15 -12  -2   67.02   10.60
 -12  15  -2   69.96   10.86
 -12  15   2   77.83   10.62
 -15 -12   2   70.55   10.60
  15  12   2   76.10   11.10
  15  12   2   97.32   10.05
 -12  15   2   72.84   12.33
  12 -15   2   84.63    8.98
 -11  15  -2    3.71    5.59
 -11  15  -2   -2.69    6.24
 -15 -11  -2   -4.01    6.12
  15  11  -2    5.08    6.71
 -11  15   2  -11.75    7.12
 -11  15   2   -0.95    5.68
  15  11   2    3.21    6.11
  11 -15   2    3.52    4.95
  15  11   2  -16.04    4.40
 -15 -11   2   15.66    7.40
 -10  15  -2  144.98   14.40
 -10  15  -2  117.34   12.01
  15  10  -2  112.28   12.32
 -15 -10  -2  119.38   12.76
 -10  15   2  127.43   15.14
  10 -15   2  107.14   10.47
  15  10   2  121.92   10.64
 -10  15   2  120.73   12.10
 -15 -10   2  138.88   13.48
  15  10   2  119.57   12.71
  -9  15  -2    6.19    6.16
  -9  15  -2   14.35    6.88
   9 -15  -2    5.51    3.76
  15   9  -2    2.81    5.69
 -15  -9  -2    2.33    6.18
 -15  -9   2    1.06    5.96
  -9  15   2   25.51    8.86
  -9  15   2   14.17    7.04
  15   9   2   15.19    5.63
   9 -15   2   -3.73    5.38
  15   9   2    9.64    6.81
  15   8  -2   56.50    9.40
 -15  -8  -2   55.54    8.88
  -8  15  -2   58.98    9.56
  -8  15  -2   54.97    8.57
   8 -15  -2   68.64    6.73
   8 -15   2   62.52    8.32
  -8  15   2   60.29    8.49
  15   8   2   57.50    9.11
  -8  15   2   56.36   11.12
 -15  -8   2   49.35    8.64
  15   8   2   64.70    8.03
  -7  15  -2   66.15    9.12
  15   7  -2   53.40    8.43
  -7  15  -2   50.91    8.87
   7 -15  -2   55.61    6.60
 -15  -7  -2   60.50    9.40
  -7  15   2   61.76    8.72
  15   7   2   47.51    8.49
   7 -15   2   52.24    8.18
 -15  -7   2   59.59    8.51
  -7  15   2   54.57   10.43
  15   7   2   62.06    8.07
 -15  -6  -2  267.19   17.12
 -15  -6  -2  270.08   16.51
  -6  15  -2  301.13   17.87
   6 -15  -2  289.94   15.08
  15   6  -2  243.15   16.32
  -6  15  -2  274.83   18.15
  -6  15   2  294.05   20.48
  -6  15   2  276.00   16.80
   6 -15   2  276.60   17.18
 -15  -6   2  291.20   16.81
  15   5  -2   -1.62    5.02
 -15  -5  -2    0.87    5.16
   5 -15  -2   -1.83    4.21
  -5  15  -2    1.79    5.25
 -15  -5  -2    1.89    5.55
  -5  15  -2    4.93    5.99
  -5  15   2   -3.58    4.77
  -5  15   2    1.98    6.15
   5 -15   2   -4.31    5.78
 -15  -5   2   -1.59    4.63
 -15  -4  -2   97.00   10.23
  -4  15  -2  107.31   11.08
 -15  -4  -2  102.49   10.28
  -4  15  -2  115.09   11.18
   4 -15  -2  103.13    9.49
 -15  -4   2  113.23    9.52
   4 -15   2  107.49   11.00
  -4  15   2  114.03    9.98
  -4  15   2  102.23   11.87
 -15  -3  -2   57.24    9.80
 -15  -3  -2   45.81    7.63
  -3  15  -2   47.91    7.90
  -3  15  -2   49.52    8.01
   3 -15  -2   56.52    7.56
 -15  -3  -2   44.67    7.79
   3 -15   2   48.88    7.92
 -15  -3   2   43.96    8.20
 -15  -3   2   42.23    6.35
  -3  15   2   47.63    7.14
 -15  -3   2   42.53    9.98
  -3  15   2   49.18    9.72
  -2  15  -2  137.65   11.98
   2 -15  -2  145.70   11.57
 -15  -2  -2  159.49   14.63
 -15  -2  -2  162.52   11.76
  -2  15  -2  166.68   12.93
 -15  -2  -2  161.18   12.62
 -15  -2   2  149.32   12.43
  -2  15   2  151.40   10.54
 -15  -2   2  121.17    9.48
   2 -15   2  155.19   12.43
 -15  -2   2  154.20   15.41
  -2  15   2  113.89   12.50
  -1  15  -2  169.08   12.90
 -15  -1  -2  156.75   12.77
   1 -15  -2  138.86   11.35
 -15  -1  -2  187.10   12.20
  -1  15  -2  155.68   12.98
 -15  -1  -2  166.84   14.77
 -15  -1   2  153.03   12.95
 -15  -1   2  170.22   14.71
 -15  -1   2  164.03   10.20
 -15  -1   2  180.34   16.96
  -1  15   2  156.27   11.04
  -1  15   2  173.21   14.40
   1 -15   2  136.83   12.50
   0  15  -2  224.08   14.97
 -15   0  -2  221.03   15.98
 -15   0  -2  199.89   14.62
   0  15  -2  225.54   15.00
   0 -15  -2  211.90   14.55
  15   0   2  209.87   12.86
 -15   0   2  203.75   14.76
   0 -15   2  195.46   14.72
   0  15   2  214.36   15.91
   0  15   2  208.57   12.18
 -15   0   2  214.18   11.49
 -15   0   2  190.56   16.59
 -15   0   2  209.78   16.08
   1  15  -2   32.76    7.21
 -15   1  -2   19.95    7.98
   1  15  -2   33.78    7.06
 -15   1  -2   36.06    7.63
  -1 -15  -2   28.65    7.33
   1  15   2   31.72    8.05
 -15   1   2   25.38    7.16
   1  15   2   31.63    5.62
 -15   1   2   46.79    9.87
 -15   1   2   26.33    7.21
  15  -1   2   27.54    5.39
 -15   1   2   35.73    4.51
  -1 -15   2   34.20    7.86
 -15   2  -2   37.54    8.42
   2  15  -2   40.78    7.89
  -2 -15  -2   39.50    8.10
 -15   2  -2   27.00    7.21
   2  15  -2   29.90    7.23
 -15   2   2   31.08    4.24
 -15   2   2   29.46    7.73
   2  15   2   29.32    5.50
   2  15   2   31.91    8.32
  15  -2   2   33.88    5.86
 -15   2   2   25.19    7.03
 -15   2   2   29.30    9.10
  -2 -15   2   24.64    7.41
 -15   3  -2   -5.98    5.13
  15  -3  -2    2.79    2.31
   3  15  -2   -2.68    5.50
   3  15  -2    3.92    5.08
  -3 -15  -2   -2.18    5.44
 -15   3  -2   -0.47    6.93
  -3 -15   2   -2.50    6.00
   3  15   2   -2.07    3.81
  15  -3   2    5.00    4.38
 -15   3   2   -1.24    6.56
 -15   3   2    3.84    5.88
   3  15   2   11.14    6.31
 -15   3   2    0.76    7.41
   4  15  -2  171.26   13.13
   4  15  -2  148.93   13.63
 -15   4  -2  153.32   12.94
  -4 -15  -2  162.74   13.14
   4  15   2  164.31   14.95
  -4 -15   2  154.87   13.73
 -15   4   2  164.86   14.09
 -15   4   2  145.28   13.50
   4  15   2  155.72   10.44
 -15   4   2  194.24   17.33
  15  -4   2  153.76   11.39
   5  15  -2  133.08   13.09
 -15   5  -2  143.71   12.71
 -15   5  -2  138.27   10.92
   5  15  -2  141.32   12.52
  -5 -15  -2  146.16   12.66
   5  15   2  140.54    9.73
 -15   5   2  138.99   13.62
 -15   5   2  148.01   12.77
   5  15   2   99.91   11.96
  -5 -15   2  138.65   14.15
  15  -5   2  119.74   10.11
  -6 -15  -2  170.62   14.63
   6  15  -2  171.56   14.08
   6  15  -2  149.01   12.40
 -15   6  -2  163.23   11.65
 -15   6  -2  170.84   13.84
  -6 -15   2  151.74   14.70
  15  -6   2  158.70   11.06
 -15   6   2  165.76   15.59
   6  15   2  190.91   15.78
 -15   6   2  125.14   12.95
   6  15   2  144.28   10.19
  -7 -15  -2   81.04   10.85
   7  15  -2   52.08    8.98
 -15   7  -2   64.81    7.66
   7  15  -2   80.41   10.88
 -15   7  -2   82.42   10.51
  15  -7   2   69.95    8.05
 -15   7   2   58.14    9.63
   7  15   2   82.93    7.49
 -15   7   2   67.62   10.89
  -7 -15   2   60.58   10.10
   7  15   2   70.26   10.75
   8  15  -2   82.74   10.54
 -15   8  -2   87.73   11.16
   8  15  -2   93.28   11.32
 -15   8  -2   95.15    8.86
  -8 -15  -2  100.57   11.79
  -8 -15   2   93.79   12.08
 -15   8   2   91.50   12.17
   8  15   2   96.18    8.71
   8  15   2   98.11   12.61
  15  -8   2  108.19    9.26
 -15   8   2  101.87   11.93
   9  15  -2   17.63    7.29
   9  15  -2   31.21    8.48
 -15   9  -2   34.02    8.23
  -9 -15  -2   14.06    7.42
 -15   9  -2   36.75    6.39
 -15   9   2   17.98    7.63
  15  -9   2   34.01    5.97
   9  15   2   30.45    5.83
   9  15   2   37.69    9.82
 -15   9   2   26.57    8.95
  -9 -15   2   34.27    8.81
 -15  10  -2  189.11   15.42
  10  15  -2  167.15   13.96
  10  15  -2  181.31   15.52
 -10 -15  -2  175.97   16.90
 -15  10  -2  179.71   12.59
  10  15   2  173.78   11.64
  15 -10   2  165.93   11.37
 -10 -15   2  189.56   15.61
 -15  10   2  181.49   16.59
 -15  10   2  142.89   14.40
  10  15   2  152.64   15.71
 -15  11  -2   30.83    6.46
  11  15  -2   15.38    8.09
 -11 -15  -2   23.58    8.52
  11  15  -2   28.76    8.32
 -15  11  -2   22.61    7.97
  11  15   2   22.95    5.98
 -15  11   2   22.44    7.95
 -11 -15   2   37.34    9.06
  11  15   2   28.27    8.46
 -15  11   2   26.69    9.05
  12  15  -2  216.96   17.18
 -15  12  -2  227.50   17.40
  12  15  -2  235.95   19.00
 -15  12  -2  204.83   14.66
 -12 -15  -2  226.06   17.57
 -15  12   2  245.53   18.28
 -15  12   2  245.57   20.24
  12  15   2  225.46   14.39
  12  15   2  215.15   17.94
 -12 -15   2  207.09   17.30
 -15  13  -2  183.05   17.34
 -13 -15  -2  185.07   15.92
  13  15  -2  142.11   15.25
  13  15  -2  154.54   15.33
  13  15   2  186.22   16.71
  13  15   2  171.62   13.25
 -15  13   2  169.12   17.66
 -15  13   2  168.87   15.14
 -13 -15   2  179.02   17.14
  14  15  -2   95.14   12.24
 -15  14  -2   78.23   12.90
 -14 -15  -2   98.29   13.17
  14  15  -2   90.46   12.45
 -15  14   2   96.79   12.91
 -14 -15   2   79.01   12.67
 -15  14   2   98.10   13.99
  14  15   2   86.56   13.51
 -15  15  -2   18.36    8.34
  15  15  -2   10.30    7.58
  15  15  -2   16.40    9.35
 -15 -15  -2   32.20    9.25
 -15  15   2   19.77    9.56
 -15 -15   2   27.00    9.21
  15  15   2   32.99    9.49
 -15  15   2   37.97   10.00
 -15  16  -2   65.79   12.70
 -16 -15  -2   70.19   11.89
  16  15  -2   80.33   12.30
  16  15  -2   91.81   12.89
 -16 -15   2   71.17   11.65
 -15  16   2   82.96   12.68
 -15  16   2   71.11   13.12
  16  15   2   70.85   12.35
  16  14  -2   -3.19    6.55
 -16 -14  -2   -5.75    6.54
 -14  16  -2   -5.43    6.66
  16  14  -2   -1.35    7.34
 -14  16   2   -5.45    6.04
 -16 -14   2    2.32    7.01
  16  14   2   10.32    7.89
 -14  16   2    2.12    8.48
 -16 -13  -2  121.21   13.91
 -13  16  -2   98.70   12.66
  16  13  -2  113.37   13.84
  16  13   2  146.39   12.78
 -13  16   2  143.50   16.36
  16  13   2  112.27   14.22
 -16 -13   2  116.82   13.44
 -13  16   2  107.85   12.75
 -16 -12  -2   79.65   12.08
 -12  16  -2   52.07    8.73
  16  12  -2   48.24    9.87
 -12  16  -2   66.35   10.70
 -16 -12   2   76.46   11.32
 -12  16   2   56.65   11.55
 -12  16   2   54.36   10.10
  16  12   2   63.76    8.98
  12 -16   2   70.79    9.74
  16  12   2   75.32   11.11
 -11  16  -2  109.69   12.04
 -11  16  -2  132.34   14.19
 -16 -11  -2  137.42   14.26
  16  11  -2  124.18   13.27
  16  11   2  126.25   11.08
  16  11   2  121.93   13.12
 -16 -11   2  136.21   13.83
 -11  16   2  118.09   12.98
 -11  16   2  111.23   14.95
  11 -16   2  127.56   11.16
 -10  16  -2   27.40    7.75
 -16 -10  -2   30.20    8.72
 -10  16  -2   33.43    8.50
  16  10  -2   34.86    8.60
  16  10   2   46.13    7.65
 -16 -10   2   29.62    8.53
  16  10   2   27.44    7.72
 -10  16   2   21.12    9.61
  10 -16   2   41.34    7.49
 -10  16   2   29.06    8.14
  16   9  -2   86.90   11.31
 -16  -9  -2   92.11   11.29
  -9  16  -2   92.03   11.00
  -9  16  -2  103.42   11.99
  -9  16   2   81.23   10.26
  16   9   2   79.47   10.47
 -16  -9   2   92.30   10.67
  -9  16   2   84.63   12.97
  16   9   2   98.85    9.95
   9 -16   2  105.02   10.47
  -8  16  -2   48.27    9.75
   8 -16  -2   58.21    6.64
  -8  16  -2   36.98    7.98
  16   8  -2   45.14    8.71
 -16  -8  -2   61.29    9.79
  16   8   2   51.36    9.01
  16   8   2   44.74    7.41
  -8  16   2   42.49   10.87
   8 -16   2   40.34    7.91
  -8  16   2   55.55    8.96
 -16  -8   2   43.09    7.59
  -7  16  -2   92.38   11.08
  -7  16  -2  107.86   11.50
 -16  -7  -2  100.47   10.96
   7 -16  -2   97.72    8.70
  16   7  -2   89.32   10.50
  16   7   2   79.46   10.37
  -7  16   2  100.18   12.99
   7 -16   2   98.45   10.59
  -7  16   2   87.48   10.06
 -16  -7   2  107.71   10.89
  16   7   2  101.02    9.91
 -16  -6  -2   12.26    6.33
 -16  -6  -2   -0.66    5.48
  -6  16  -2    5.32    5.92
  -6  16  -2   -2.32    5.98
   6 -16  -2   12.16    4.93
  16   6  -2   -3.67    5.69
   6 -16   2   10.24    6.06
  -6  16   2    0.26    7.32
  -6  16   2   12.22    5.68
 -16  -6   2   -4.22    4.77
 -16  -5  -2  189.83   13.75
  -5  16  -2  168.36   14.27
  16   5  -2  155.71   13.54
  -5  16  -2  196.59   15.19
   5 -16  -2  174.08   12.07
 -16  -5  -2  159.30   12.69
  -5  16   2  173.87   12.84
 -16  -5   2  167.21   12.30
   5 -16   2  201.70   14.21
  -5  16   2  162.82   16.30
 -16  -4  -2  105.59   11.10
   4 -16  -2  115.21    9.83
  -4  16  -2  103.11   11.00
 -16  -4  -2  125.18   11.47
  -4  16  -2   89.76   10.80
  -4  16   2  108.88   12.84
   4 -16   2  105.08   11.39
 -16  -4   2  109.24    9.62
  -4  16   2  120.37   10.49
  -3  16  -2  139.13   12.60
  -3  16  -2  150.77   13.30
 -16  -3  -2  134.82   12.61
   3 -16  -2  131.70   11.20
 -16  -3  -2  127.48   11.52
 -16  -3   2  122.76    9.63
   3 -16   2  127.66   12.51
 -16  -3   2  128.54   15.01
  -3  16   2   96.28   12.03
  -3  16   2  131.60   10.57
 -16  -3   2  106.69   11.83
  -2  16  -2  108.73   11.98
 -16  -2  -2  130.81   14.16
  -2  16  -2  137.15   12.20
 -16  -2  -2  113.03   11.61
 -16  -2  -2  130.37   11.01
   2 -16  -2  129.45   11.14
  -2  16   2  116.38    9.95
   2 -16   2  132.83   12.74
 -16  -2   2  122.37   15.45
 -16  -2   2  132.20   12.73
  -2  16   2  102.45   12.19
 -16  -2   2  120.88    9.56
  -1  16  -2  207.69   14.92
   1 -16  -2  198.76   13.99
 -16  -1  -2  198.52   13.19
  -1  16  -2  168.24   14.19
 -16  -1  -2  205.73   14.51
 -16  -1  -2  182.63   16.40
 -16  -1   2  174.02   14.59
 -16  -1   2  219.94   12.21
   1 -16   2  168.38   14.35
  -1  16   2  206.37   16.22
  -1  16   2  194.00   12.29
 -16  -1   2  184.76   16.30
 -16  -1   2  222.28   18.08
 -16   0  -2   33.48    9.09
   0 -16  -2   29.19    7.31
 -16   0  -2   35.65    7.39
   0  16  -2   18.02    6.70
   0  16  -2   36.34    7.99
  16   0   2   30.96    5.64
 -16   0   2   25.08    9.25
 -16   0   2   27.82    7.34
 -16   0   2   28.90    7.54
   0  16   2   35.83    8.57
   0 -16   2   15.89    7.33
   0  16   2   17.36    5.36
 -16   0   2   29.45    4.83
  -1 -16  -2  173.71   13.91
 -16   1  -2  149.65   12.70
   1  16  -2  161.32   13.57
   1  16  -2  179.17   14.29
 -16   1  -2  155.58   15.36
   1  16   2  143.94   14.71
  16  -1   2  172.18   11.63
 -16   1   2  156.72   16.24
 -16   1   2  159.01    9.58
 -16   1   2  166.19   15.14
   1  16   2  160.72   11.10
  -1 -16   2  174.74   14.03
 -16   1   2  160.16   14.83
   2  16  -2   23.26    6.87
  16  -2  -2   36.28    4.44
 -16   2  -2   24.30    7.47
   2  16  -2   35.01    7.71
 -16   2  -2   35.60    8.85
  -2 -16  -2   31.28    7.37
 -16   2   2   36.80    9.85
  16  -2   2   21.09    5.60
   2  16   2   35.58    5.87
 -16   2   2   28.33    8.44
  -2 -16   2   23.96    7.75
   2  16   2   30.59    8.01
 -16   2   2   35.31    8.31
 -16   3  -2  402.27   22.60
   3  16  -2  412.54   21.64
  -3 -16  -2  403.21   21.97
 -16   3  -2  364.92   23.40
   3  16  -2  348.27   21.95
   3  16   2  395.52   19.25
 -16   3   2  428.05   26.05
   3  16   2  408.05   24.29
 -16   3   2  362.82   23.11
  -3 -16   2  388.60   22.96
  16  -3   2  405.55   20.81
 -16   3   2  402.54   23.21
 -16   4  -2  304.43   18.74
   4  16  -2  300.79   17.56
  -4 -16  -2  300.95   19.34
   4  16  -2  273.38   18.43
   4  16   2  324.47   21.30
 -16   4   2  294.84   19.10
   4  16   2  311.46   16.18
 -16   4   2  291.59   20.22
  16  -4   2  330.35   17.58
 -16   4   2  324.53   21.76
  -4 -16   2  302.15   20.63
   5  16  -2  107.99   11.64
   5  16  -2  119.98   12.79
 -16   5  -2  125.25   10.95
 -16   5  -2  116.51   13.16
  -5 -16  -2  142.27   13.59
   5  16   2  105.51   12.30
 -16   5   2  104.40   12.47
 -16   5   2  113.63   12.59
 -16   5   2  120.99   14.67
  -5 -16   2  117.03   13.09
   5  16   2  126.20    9.57
  16  -5   2  117.65   10.48
   6  16  -2  197.10   14.72
   6  16  -2  216.73   16.44
 -16   6  -2  236.82   14.19
  -6 -16  -2  222.75   16.39
 -16   6  -2  225.80   16.45
  -6 -16   2  220.08   17.81
 -16   6   2  233.29   17.61
   6  16   2  200.00   17.80
   6  16   2  210.29   12.73
 -16   6   2  200.18   15.79
  16  -6   2  209.73   13.49
   7  16  -2  160.29   13.66
 -16   7  -2  148.35   14.96
   7  16  -2  162.26   15.43
 -16   7  -2  169.75   12.06
  -7 -16  -2  165.73   14.46
 -16   7   2  151.39   14.97
   7  16   2  151.92   10.66
 -16   7   2  158.34   14.07
   7  16   2  152.20   15.24
  -7 -16   2  133.79   14.34
  16  -7   2  160.37   11.15
   8  16  -2    7.38    6.47
   8  16  -2    7.49    6.53
 -16   8  -2   -4.78    5.86
  -8 -16  -2   -2.10    6.17
 -16   8  -2    3.17    4.81
  -8 -16   2    0.62    7.05
  16  -8   2    2.27    4.53
   8  16   2    6.61    7.13
 -16   8   2   13.41    7.80
   8  16   2   -3.28    4.07
 -16   8   2    0.35    6.66
   9  16  -2   98.62   11.28
  -9 -16  -2   61.86   10.41
 -16   9  -2   88.70    8.87
   9  16  -2   79.41   11.77
 -16   9  -2   82.26   11.23
  16  -9   2   98.41   12.05
 -16   9   2   85.51   12.29
   9  16   2   98.08    8.84
  -9 -16   2   90.99   12.41
 -16   9   2   86.92   11.66
   9  16   2   77.50   11.62
  10  16  -2    6.73    6.99
 -16  10  -2    8.45    6.97
 -10 -16  -2    8.05    8.68
 -16  10  -2   10.06    5.15
  10  16  -2   11.65    7.53
 -10 -16   2   14.79    8.22
  10  16   2   14.61    5.09
 -16  10   2    5.79    8.11
  10  16   2    5.27    7.00
 -16  10   2   16.24    8.14
 -16  11  -2   81.34   11.69
  11  16  -2  105.64   12.22
 -11 -16  -2   75.68   11.87
  11  16  -2   79.14   11.53
 -16  11   2   85.77   12.75
  11  16   2   80.80   12.32
 -16  11   2   74.82   11.32
  11  16   2   87.88   10.25
 -11 -16   2   80.20   12.01
 -16  12  -2   49.60   10.98
  12  16  -2   38.84    9.40
  12  16  -2   43.55   10.34
 -12 -16  -2   40.95    9.75
 -16  12   2   34.11   10.45
 -16  12   2   45.90    9.48
 -12 -16   2   45.01   10.21
  12  16   2   40.04   10.73
 -13 -16  -2   88.79   13.04
  13  16  -2   98.80   12.43
 -16  13  -2   92.94   12.94
  13  16  -2   62.15   11.21
 -16  13   2   66.73   11.80
  13  16   2   63.34   12.31
 -13 -16   2   69.60   12.67
 -16  13   2   75.93   12.07
  14  16  -2   69.60   11.59
  14  16  -2   69.16   11.74
 -16  14  -2  100.95   13.16
 -14 -16  -2   91.39   13.71
  14  16   2   75.90   12.38
 -14 -16   2  102.88   14.63
 -16  14   2   84.73   11.96
 -16  14   2  103.50   14.09
  15  16  -2   46.16   10.49
 -15 -16  -2   61.07   12.41
  15  16  -2   61.87   11.34
 -16  15  -2   69.83   12.90
 -15 -16   2   81.32   12.99
  15  16   2   46.37   11.80
 -16  15   2   77.74   11.74
 -16  15   2   83.18   13.64
 -16  16  -2   14.49    8.61
  16  16  -2    5.46    7.97
  16  16  -2   -1.19    8.11
 -16 -16  -2    8.88    9.06
 -16 -16   2    3.74    8.33
  16  16   2   -1.06    8.77
 -16  16   2   -2.20    6.74
 -16  16   2   -6.11    8.54
 -16  17  -2  131.78   15.99
 -17 -16  -2  164.38   18.54
  17  16  -2  158.73   17.17
  17  16  -2  155.72   16.20
  17  16   2  151.09   17.09
 -16  17   2  171.89   17.42
 -17 -16   2  165.62   18.29
 -16  17   2  149.93   18.09
  17  15  -2   65.46   11.65
 -17 -15  -2   73.83   12.54
 -15  17  -2   53.55   11.96
  17  15  -2   52.67   11.86
 -15  17   2   47.73   10.56
  17  15   2   55.43   12.28
 -17 -15   2   54.02   11.74
 -15  17   2   61.36   12.82
  17  14  -2   87.99   12.74
 -14  17  -2   90.48   12.81
  17  14  -2   95.10   13.49
 -17 -14  -2   92.58   13.03
 -14  17   2   74.56   12.21
 -17 -14   2  104.07   14.18
  17  14   2  116.72   15.11
 -14  17   2   86.98   14.38
 -17 -13  -2    4.64    8.19
  17  13  -2    1.51    7.76
 -13  17  -2   12.88    7.51
  17  13   2    6.50    6.20
 -13  17   2   15.07    8.19
 -13  17   2   -2.01    8.16
 -17 -13   2    5.76    8.02
  17  13   2   24.09    8.47
  17  12  -2   76.05   11.65
 -17 -12  -2   99.59   12.73
 -12  17  -2   99.48   12.69
  17  12   2   82.57   12.93
 -12  17   2   98.26   14.50
  17  12   2   95.91   10.81
 -12  17   2   94.61   12.05
 -17 -12   2   89.81   12.35
 -11  17  -2  148.24   15.19
 -11  17  -2  129.07   13.33
  17  11  -2  161.80   13.94
 -17 -11  -2  132.18   14.33
  11 -17   2  158.94   12.52
  17  11   2  182.23   16.59
  17  11   2  140.03   12.34
 -11  17   2  156.28   17.42
 -17 -11   2  167.91   15.62
 -11  17   2  137.73   14.08
 -10  17  -2   82.55   11.65
 -17 -10  -2   73.50   10.98
 -10  17  -2   88.89   11.21
  17  10  -2   81.38   10.62
 -17 -10   2   95.38   11.83
  17  10   2  124.36   13.50
 -10  17   2   77.39   10.99
  17  10   2   88.31   10.12
  10 -17   2   83.02    9.75
 -10  17   2   89.54   14.18
  -9  17  -2   58.58   10.14
 -17  -9  -2   73.01   10.88
  17   9  -2   53.33    9.48
  -9  17  -2   74.41   10.66
  17   9   2   58.06    8.66
  -9  17   2   65.93   11.98
  -9  17   2   69.90   10.22
  17   9   2   60.32   10.22
   9 -17   2   71.92    9.27
 -17  -9   2   66.42    9.89
  -8  17  -2  122.02   13.09
  -8  17  -2  169.68   15.64
 -17  -8  -2  122.00   12.99
   8 -17  -2  150.24   10.25
  17   8  -2  159.80   14.38
   8 -17   2  161.39   13.30
  -8  17   2  157.32   17.22
  -8  17   2  158.44   13.56
 -17  -8   2  140.94   13.05
  17   8   2  150.88   14.29
  17   8   2  174.46   12.91
  -7  17  -2   20.11    7.74
  -7  17  -2   18.39    7.39
 -17  -7  -2   18.25    7.67
  17   7  -2   15.20    7.57
   7 -17  -2   25.14    5.77
  -7  17   2   28.16    7.44
  17   7   2   22.99    7.14
  -7  17   2   31.45    9.53
 -17  -7   2   14.89    6.43
  17   7   2   19.96    6.70
   7 -17   2   26.25    7.08
   6 -17  -2  185.31   12.38
 -17  -6  -2  197.42   14.72
 -17  -6  -2  185.61   14.96
  17   6  -2  180.81   14.09
  -6  17  -2  201.20   15.36
  -6  17  -2  213.82   15.66
   6 -17   2  182.18   14.55
  -6  17   2  248.16   19.22
  -6  17   2  197.42   14.24
 -17  -6   2  191.88   13.78
 -17  -5  -2   -5.54    5.49
  17   5  -2    6.28    6.53
  -5  17  -2   -2.05    5.70
   5 -17  -2   -1.20    4.79
  -5  17  -2   -8.02    5.72
 -17  -5  -2   -2.31    5.59
  -5  17   2    8.40    5.60
   5 -17   2   -2.39    5.83
 -17  -5   2   -1.65    4.36
  -5  17   2   -1.29    7.19
 -17  -4  -2   90.94   10.74
  -4  17  -2   92.19   10.88
 -17  -4  -2   83.88   10.10
  -4  17  -2  105.27   11.53
   4 -17  -2  109.85   10.21
  -4  17   2   96.87   10.00
  -4  17   2   93.36   12.91
   4 -17   2  103.87   11.30
 -17  -4   2  119.06   10.27
 -17  -3  -2  184.67   14.19
  -3  17  -2  170.01   14.57
  -3  17  -2  162.79   14.32
 -17  -3  -2  181.88   13.22
   3 -17  -2  150.62   12.46
 -17  -3   2  171.35   12.18
  -3  17   2  193.96   17.29
   3 -17   2  178.71   14.69
  -3  17   2  177.45   12.55
 -17  -3   2  162.49   14.38
  -2  17  -2  181.71   14.60
 -17  -2  -2  172.01   14.24
 -17  -2  -2  171.24   16.39
  -2  17  -2  179.44   14.48
 -17  -2  -2  168.70   12.82
   2 -17  -2  182.20   13.37
  -2  17   2  158.45   11.77
   2 -17   2  171.64   14.88
 -17  -2   2  185.54   11.75
 -17  -2   2  141.24   16.43
 -17  -2   2  182.07   14.55
  -2  17   2  161.25   15.33
  -1  17  -2   77.12   10.40
   1 -17  -2   85.38   10.24
  -1  17  -2   93.74   10.92
 -17  -1  -2   74.53    9.36
 -17  -1  -2  104.09   13.38
 -17  -1  -2   93.05   10.83
   1 -17   2  102.06   11.62
 -17  -1   2   72.97   12.67
  -1  17   2  113.06   13.59
  -1  17   2   90.59    9.18
 -17  -1   2   98.10   11.58
 -17  -1   2   91.01    8.40
   0  17  -2  119.51   12.17
   0 -17  -2  114.39   12.17
 -17   0  -2  128.73   13.06
   0  17  -2  149.44   13.24
 -17   0  -2  149.28   15.12
  17   0   2  142.37   11.41
 -17   0   2  135.89   14.02
 -17   0   2  144.09   16.06
 -17   0   2  153.24    9.83
 -17   0   2  158.56   14.79
   0 -17   2  122.86   13.64
   0  17   2  144.75   10.62
   0  17   2  137.75   14.80
 -17   1  -2   12.59    6.85
  -1 -17  -2    6.72    6.86
 -17   1  -2   16.71    8.88
   1  17  -2   10.85    6.38
   1  17  -2   -3.07    6.05
 -17   1   2   10.70    7.38
 -17   1   2   -0.16    8.62
  17  -1   2    8.17    4.40
 -17   1   2    5.06    6.87
  -1 -17   2   -0.22    7.24
 -17   1   2   -1.03    3.30
   1  17   2    2.28    4.63
   1  17   2    3.77    7.08
   2  17  -2  207.34   14.88
  -2 -17  -2  233.33   15.99
 -17   2  -2  197.97   18.04
 -17   2  -2  222.50   16.54
   2  17  -2  234.10   16.85
  17  -2   2  228.48   14.45
   2  17   2  234.28   17.57
 -17   2   2  218.59   17.69
 -17   2   2  248.72   19.36
   2  17   2  217.25   13.34
 -17   2   2  227.70   17.28
  -2 -17   2  202.19   16.27
  -3 -17  -2   50.26    9.66
 -17   3  -2   49.93   11.25
   3  17  -2   54.96    9.64
   3  17  -2   61.94    9.44
 -17   3  -2   58.33   10.11
   3  17   2   71.46    7.44
   3  17   2   51.34    9.78
  17  -3   2   58.29    8.05
 -17   3   2   46.77    9.30
 -17   3   2   54.94   12.06
  -3 -17   2   60.27   10.14
 -17   3   2   48.49    9.41
  -4 -17  -2   68.62   10.68
 -17   4  -2   82.14   13.17
 -17   4  -2   65.51   10.17
   4  17  -2  101.82   12.00
   4  17  -2   70.92    9.42
 -17   4   2   64.70   13.10
  17  -4   2   84.86    9.17
 -17   4   2   89.71   11.86
  -4 -17   2   71.90   11.16
 -17   4   2   67.99   10.44
   4  17   2   61.02   10.49
   4  17   2   83.04    8.09
 -17   5  -2  133.17   13.43
   5  17  -2  128.03   13.12
  -5 -17  -2  129.56   13.40
   5  17  -2  141.38   13.03
   5  17   2  178.82   11.08
 -17   5   2  133.07   14.06
  -5 -17   2  142.29   15.38
 -17   5   2  159.43   16.77
  17  -5   2  121.33   11.02
 -17   5   2  139.86   14.40
   5  17   2  161.59   15.78
  -6 -17  -2  194.20   15.66
   6  17  -2  209.20   15.12
 -17   6  -2  177.68   16.10
   6  17  -2  182.15   15.54
 -17   6  -2  184.85   13.02
  -6 -17   2  176.91   15.80
  17  -6   2  169.63   12.11
 -17   6   2  180.80   16.73
   6  17   2  203.96   17.82
   6  17   2  180.63   11.58
 -17   6   2  161.28   17.46
 -17   6   2  200.01   16.58
   7  17  -2   82.87   10.48
 -17   7  -2   78.02    8.71
   7  17  -2   83.36   11.39
 -17   7  -2   70.97   10.91
  -7 -17  -2  107.51   13.00
  -7 -17   2   83.40   12.09
  17  -7   2   94.86    9.18
   7  17   2   79.59   11.81
 -17   7   2   89.09   11.83
 -17   7   2   59.00   10.41
   7  17   2  101.79    8.97
 -17   8  -2   63.32   10.59
   8  17  -2   90.47   11.54
  -8 -17  -2   76.52   11.09
   8  17  -2   87.10   10.80
 -17   8  -2   65.81    8.14
  -8 -17   2   75.51   12.40
   8  17   2   67.49   11.72
 -17   8   2   75.34   11.36
   8  17   2   94.12    8.43
 -17   8   2   74.32   11.37
   9  17  -2   15.39    7.30
  -9 -17  -2    3.58    7.14
 -17   9  -2   18.00    5.54
 -17   9  -2   20.79    7.93
   9  17  -2    8.14    7.68
   9  17   2    9.11    8.59
   9  17   2   25.36    8.35
  -9 -17   2   14.17    8.29
 -17   9   2   12.47    7.43
 -17   9   2    8.22    8.06
 -17  10  -2   72.57   11.83
  10  17  -2   96.87   12.79
 -10 -17  -2   91.05   13.23
  10  17  -2   89.24   11.26
 -10 -17   2   92.71   13.61
  10  17   2   78.04   12.74
 -17  10   2   77.26   12.08
 -17  10   2   95.99   11.98
  11  17  -2   -1.86    6.96
 -11 -17  -2   13.53    7.84
 -17  11  -2    5.56    7.39
  11  17  -2    0.41    6.87
 -17  11   2    1.48    7.57
  11  17   2   14.18    8.20
 -17  11   2   13.99    8.53
 -11 -17   2   13.78    8.47
  12  17  -2   99.94   12.18
  12  17  -2   86.63   12.94
 -17  12  -2   78.87   12.43
 -12 -17  -2   81.77   12.48
 -17  12   2   98.07   13.36
  12  17   2   88.50   12.78
 -12 -17   2  101.68   13.64
 -17  12   2   85.07   13.04
 -13 -17  -2   28.23    9.96
  13  17  -2   47.51   11.15
  13  17  -2   21.03    8.30
 -17  13  -2   19.15    8.74
  13  17   2    1.60    7.55
 -17  13   2   30.67    9.02
 -13 -17   2   27.55   10.37
 -17  13   2   22.20    8.91
  14  17  -2   71.63   12.99
 -17  14  -2   85.94   12.48
 -14 -17  -2   64.11   11.97
  14  17  -2   74.99   11.61
 -17  14   2   79.12   13.25
 -14 -17   2   82.61   13.07
  14  17   2   68.99   12.92
 -17  14   2   88.58   13.31
 -17  15  -2   -4.64    6.96
 -15 -17  -2   -9.07    7.32
  15  17  -2   -6.78    7.70
  15  17  -2  -11.66    7.72
  15  17   2  -16.91    7.78
 -17  15   2   -7.59    7.73
 -15 -17   2   10.32    8.20
 -17  15   2    1.28    7.99
  16  17  -2   81.17   12.78
 -17  16  -2   84.60   13.74
  16  17  -2   56.75   11.73
 -16 -17  -2   65.45   12.53
 -16 -17   2   71.23   12.51
  16  17   2   59.25   13.19
 -17  16   2   89.97   13.73
 -17  16   2   67.34   12.77
 -17 -17  -2    8.57    8.56
  17  17  -2    1.25    8.83
 -17  17  -2    0.44    7.76
  17  17  -2   -5.00    8.34
 -17  17   2    6.98    7.77
 -17 -17   2    5.23    8.38
  17  17   2    4.20   10.27
 -17  17   2   -4.03    8.35
  18  16  -2   20.18    9.39
 -18 -16  -2   17.10   10.48
 -16  18  -2   15.43    9.87
  18  16  -2   31.98   10.21
  18  16   2   28.64   11.14
 -18 -16   2   41.17   11.08
 -16  18   2   33.56   11.52
 -16  18   2   28.38    9.19
  18  15  -2   89.54   14.31
 -18 -15  -2  108.48   15.09
 -15  18  -2  106.06   14.92
  18  15  -2  102.85   14.17
  18  15   2  103.92   14.64
 -15  18   2   81.75   12.90
 -18 -15   2  104.80   14.42
 -15  18   2   83.89   14.75
  18  14  -2   43.54   10.79
 -14  18  -2   48.13   10.93
 -18 -14  -2   63.46   12.37
  18  14  -2   51.70   10.91
 -18 -14   2   40.68    9.71
  18  14   2   55.07   11.59
 -14  18   2   15.06   10.25
 -14  18   2   35.66    9.32
 -18 -13  -2  107.71   14.14
  18  13  -2   83.68   12.77
 -13  18  -2  108.19   13.77
 -18 -13   2  129.69   14.62
 -13  18   2  107.77   13.42
  18  13   2   97.91   14.51
 -13  18   2  104.53   15.49
  18  12  -2   55.41   11.03
 -12  18  -2   69.63   11.88
 -18 -12  -2   57.32   11.22
 -18 -12   2   61.73   10.43
 -12  18   2   87.13   14.31
  18  12   2   60.38    9.42
 -12  18   2   69.61   11.41
  18  12   2   78.70   11.91
 -18 -11  -2   63.00   10.82
  18  11  -2   85.18   11.98
 -11  18  -2   65.87   11.47
 -11  18   2   80.15   13.69
 -18 -11   2   73.42   11.12
 -11  18   2   66.57   10.94
  11 -18   2   78.70   13.14
  18  11   2   65.75    9.41
  18  11   2   67.65   11.31
  18  10  -2   84.68   11.20
 -10  18  -2  104.57   13.06
 -10  18  -2   91.94   12.14
 -18 -10  -2   99.44   12.92
  10 -18   2  101.56   10.69
  18  10   2  101.05   11.02
 -18 -10   2  110.86   12.95
  18  10   2  100.29   12.95
 -10  18   2   99.97   12.18
 -10  18   2  104.64   15.41
  -9  18  -2  184.08   16.17
 -18  -9  -2  152.76   13.94
  18   9  -2  156.03   15.30
  -9  18  -2  136.25   15.18
 -18  -9   2  167.07   15.23
  -9  18   2  153.54   17.56
  18   9   2  159.91   15.77
   9 -18   2  170.07   13.72
  18   9   2  184.96   13.49
  -9  18   2  162.07   14.31
  -8  18  -2   26.14    8.57
  18   8  -2   26.50    7.99
  -8  18  -2   26.63    7.88
 -18  -8  -2   19.62    7.76
   8 -18   2   27.31    7.36
  18   8   2   18.60    6.09
  -8  18   2   25.05    9.58
  -8  18   2   33.98    8.04
  18   8   2   23.28    8.17
 -18  -8   2   17.69    6.70
  -7  18  -2  162.26   15.25
  -7  18  -2  157.89   14.14
   7 -18  -2  157.05   11.41
  18   7  -2  137.15   13.96
 -18  -7  -2  154.54   13.34
  -7  18   2  143.73   16.48
   7 -18   2  160.05   13.35
  18   7   2  165.88   12.73
  -7  18   2  152.70   13.19
 -18  -7   2  154.46   12.73
  18   7   2  154.44   14.12
   6 -18  -2    8.65    4.98
  -6  18  -2   -2.02    6.16
 -18  -6  -2   -0.63    5.85
  -6  18  -2   12.57    7.68
  18   6  -2   -3.23    5.29
 -18  -6  -2   -2.52    5.87
  -6  18   2    5.60    6.05
  -6  18   2   -9.35    7.30
   6 -18   2    9.18    6.44
 -18  -6   2    4.62    5.36
   5 -18  -2   58.13    8.03
  18   5  -2   60.63    9.83
 -18  -5  -2   52.39    9.21
  -5  18  -2   67.66   10.04
  -5  18  -2   55.85    9.44
 -18  -5  -2   54.81    8.49
 -18  -5   2   66.45    8.41
   5 -18   2   48.78    8.93
  -5  18   2   50.17   10.50
  -5  18   2   64.65    8.95
  -4  18  -2   16.46    6.84
 -18  -4  -2    6.81    6.15
 -18  -4  -2   22.21    6.83
  -4  18  -2    5.98    6.47
   4 -18  -2   11.33    5.82
  -4  18   2    7.88    5.70
 -18  -4   2   -3.94    4.71
   4 -18   2    0.67    6.13
  -4  18   2   -2.87    6.29
 -18  -3  -2  180.44   13.25
   3 -18  -2  155.35   12.60
  -3  18  -2  160.04   13.63
  -3  18  -2  155.48   14.60
 -18  -3  -2  149.38   13.69
 -18  -3   2  168.05   15.91
  -3  18   2  178.85   17.22
   3 -18   2  188.05   15.10
  -3  18   2  180.67   12.78
 -18  -3   2  149.23   11.80
  -2  18  -2   53.77    9.34
 -18  -2  -2   72.01    9.21
 -18  -2  -2   58.97    9.13
  -2  18  -2   56.09    8.95
   2 -18  -2   55.55    8.81
 -18  -2  -2   48.47   10.39
  -2  18   2   49.03    7.69
 -18  -2   2   59.52   13.04
   2 -18   2   68.18   10.41
 -18  -2   2   62.70    7.46
 -18  -2   2   64.17   10.43
  -2  18   2   71.01   11.08
 -18  -1  -2  205.39   17.96
   1 -18  -2  187.89   13.96
  -1  18  -2  197.88   15.92
 -18  -1  -2  198.15   15.58
  -1  18  -2  187.24   15.05
   1 -18   2  177.44   15.13
  18   1   2  219.55   13.64
 -18  -1   2  189.08   12.09
 -18  -1   2  177.00   16.71
 -18  -1   2  207.03   19.95
  -1  18   2  197.68   13.45
  -1  18   2  206.88   17.27
   0 -18  -2    6.24    6.01
   0  18  -2    5.10    6.65
   0  18  -2    6.43    6.89
 -18   0  -2    8.79    8.68
 -18   0  -2   18.62    6.93
 -18   0   2   15.85    7.17
   0  18   2    9.11    5.29
   0 -18   2   14.67    7.39
 -18   0   2   14.22    7.26
   0  18   2   21.81    7.85
 -18   0   2   11.48    4.34
 -18   0   2   10.00    8.62
  18   0   2    8.38    4.80
   1  18  -2   22.92    7.56
 -18   1  -2   11.10    8.59
  -1 -18  -2   16.31    6.84
   1  18  -2   15.12    6.94
 -18   1  -2   20.52    7.79
  -1 -18   2   22.21    7.99
 -18   1   2   23.69    8.44
   1  18   2   25.55    9.31
 -18   1   2   14.31    7.48
   1  18   2   15.09    5.45
  18  -1   2   33.73    6.44
 -18   1   2   26.15    9.70
   2  18  -2   20.04    7.21
   2  18  -2   20.54    7.67
  -2 -18  -2    4.50    7.04
 -18   2  -2   10.27    6.68
 -18   2  -2   17.48    9.20
  -2 -18   2   -0.12    7.20
  18  -2   2   21.40    5.47
 -18   2   2   13.03    8.42
   2  18   2   13.58    5.49
   2  18   2   11.97    8.30
 -18   2   2   15.45    7.52
 -18   2   2   31.07   10.97
  -3 -18  -2   68.69   10.66
 -18   3  -2   83.15   13.14
   3  18  -2   72.12   10.70
   3  18  -2   82.39   10.05
 -18   3  -2   84.54   11.69
  18  -3   2  102.47   10.34
   3  18   2   88.64    8.95
  -3 -18   2   82.12   11.66
 -18   3   2   84.95   14.02
 -18   3   2   87.48   12.00
   3  18   2   85.64   12.64
 -18   3   2   72.59   11.20
  -4 -18  -2    3.18    7.45
 -18   4  -2   -3.75    6.10
   4  18  -2    1.92    5.64
 -18   4  -2    0.25    7.78
   4  18  -2   -6.38    5.53
  18  -4   2    1.04    4.79
 -18   4   2   -0.41    8.41
   4  18   2    2.80    4.78
  -4 -18   2    7.83    7.68
 -18   4   2    0.29    6.79
 -18   4   2    5.25    7.04
   4  18   2    2.52    6.74
 -18   5  -2  247.81   18.54
 -18   5  -2  243.32   21.12
   5  18  -2  244.49   16.77
  -5 -18  -2  243.67   17.65
   5  18  -2  247.27   18.88
 -18   5   2  242.07   21.46
 -18   5   2  268.05   19.13
   5  18   2  270.06   20.52
   5  18   2  250.72   14.30
 -18   5   2  243.97   17.87
  18  -5   2  223.28   14.92
  -5 -18   2  212.48   17.65
   6  18  -2   15.49    7.20
  -6 -18  -2   15.75    8.07
 -18   6  -2   16.37    7.90
   6  18  -2   23.73    8.55
   6  18   2   11.60    8.67
 -18   6   2   28.30   11.26
 -18   6   2   20.95    8.92
  18  -6   2   25.68    9.42
   6  18   2   28.75    5.95
 -18   6   2   13.41    8.15
  -6 -18   2   23.75    8.68
 -18   7  -2  149.45   12.03
 -18   7  -2  168.60   16.32
   7  18  -2  161.24   15.25
   7  18  -2  176.33   14.45
  -7 -18  -2  150.46   15.33
   7  18   2  136.78   14.94
 -18   7   2  156.14   17.30
 -18   7   2  139.40   14.47
   7  18   2  164.01   16.09
 -18   7   2  148.65   15.19
  -7 -18   2  147.48   15.41
 -18   8  -2   50.51    7.56
 -18   8  -2   42.64    9.74
  -8 -18  -2   37.11    9.52
   8  18  -2   55.60    9.67
   8  18  -2   45.89   10.18
  -8 -18   2   64.34   11.79
   8  18   2   43.17   11.00
 -18   8   2   38.08    9.15
 -18   8   2   48.90    9.65
   9  18  -2   71.22   10.66
   9  18  -2   72.85   11.55
  -9 -18  -2   70.07   12.41
 -18   9  -2   61.48   10.95
   9  18   2   63.47   12.32
 -18   9   2   72.20   12.12
  -9 -18   2   64.69   11.72
 -18   9   2   66.88   11.68
 -18  10  -2   47.95   10.25
  10  18  -2   52.47    9.37
  10  18  -2   34.09   10.16
 -10 -18  -2   46.15   10.64
  10  18   2   34.06    9.49
 -18  10   2   60.21   10.66
 -10 -18   2   58.23   11.27
 -18  10   2   47.33   10.51
  11  18  -2  103.36   13.99
 -11 -18  -2  103.75   14.42
  11  18  -2  114.48   12.97
 -18  11  -2  105.68   13.69
  11  18   2  140.44   16.46
 -11 -18   2  118.05   15.43
 -18  11   2   99.28   13.31
 -18  11   2  122.02   14.70
  12  18  -2   -7.89    7.60
 -12 -18  -2   -1.89    7.48
 -18  12  -2    2.31    8.22
  12  18  -2   -2.14    6.64
  12  18   2    7.14    8.96
 -18  12   2    9.51    7.64
 -12 -18   2    6.39    8.23
 -18  12   2    3.84    7.63
 -18  13  -2   34.23   10.35
 -13 -18  -2   34.22   10.70
  13  18  -2   46.14   10.01
  13  18  -2   25.98    9.30
 -13 -18   2   38.14   11.27
 -18  13   2   67.52   11.92
 -18  13   2   37.66   10.77
  13  18   2   27.00   10.84
  14  18  -2    1.84    7.85
 -14 -18  -2    4.08    8.47
 -18  14  -2   14.65    8.43
  14  18  -2   -8.20    7.10
 -18  14   2    8.07    7.78
  14  18   2   -7.22    7.38
 -18  14   2    7.94    8.25
 -14 -18   2   10.83    8.74
 -18  15  -2   67.00   12.54
  15  18  -2   58.53   11.69
  15  18  -2   56.99   11.75
 -15 -18  -2   57.69   12.06
  15  18   2   50.69   11.36
 -18  15   2   40.89   10.96
 -18  15   2   36.29   10.26
 -15 -18   2   56.53   11.67
 -16 -18  -2    6.26    8.27
 -18  16  -2   18.58    9.05
  16  18  -2   10.66    9.28
  16  18  -2    3.76    8.88
 -16 -18   2   12.82   10.30
 -18  16   2   19.21   10.25
 -18  16   2    0.07    7.52
  16  18   2   18.94   10.39
  19  15  -2   24.34    9.58
 -15  19  -2    8.42    9.90
  19  15  -2   14.58   10.03
 -19 -15  -2   15.02    9.78
  19  15   2   16.96   10.32
 -19 -15   2   20.55    9.36
 -15  19   2    2.58    9.82
 -15  19   2   17.59    9.00
  19  14  -2   85.96   13.75
 -19 -14  -2   64.02   12.19
  19  14  -2   77.27   13.53
 -14  19  -2   73.51   12.31
  19  14   2   68.90   12.36
 -14  19   2   61.83   13.63
 -19 -14   2   71.49   12.62
 -14  19   2   80.01   12.65
  19  13  -2   -4.08    7.28
 -19 -13  -2   -1.20    7.40
 -13  19  -2   18.11    9.46
  19  13   2  -12.93    7.68
 -13  19   2   -1.66    6.77
 -19 -13   2    3.52    6.82
 -13  19   2   -6.82    9.06
 -19 -12  -2   80.65   12.45
  19  12  -2   69.50   11.44
 -12  19  -2   62.14   11.11
 -19 -12   2   79.22   11.97
  19  12   2   74.53   10.45
  19  12   2   76.76   12.93
 -12  19   2   69.45   11.42
 -12  19   2   65.36   13.92
 -19 -11  -2   -5.89    6.94
  19  11  -2   -2.79    7.04
 -11  19  -2   -9.70    7.05
 -19 -11   2    3.97    6.09
  19  11   2   -1.71    5.38
 -11  19   2   -1.20    8.59
 -11  19   2    1.69    6.74
  19  11   2    4.37    7.41
 -10  19  -2   56.49   11.37
 -10  19  -2   42.18   10.76
 -19 -10  -2   67.06   10.49
  19  10  -2   62.92   10.58
  10 -19   2   66.50    9.12
 -10  19   2   75.56   10.83
 -10  19   2   65.35   13.31
  19  10   2   53.62    9.24
  19  10   2   60.58   11.25
 -19 -10   2   53.99    9.88
  -9  19  -2   36.15    9.33
  19   9  -2   43.49    9.28
  -9  19  -2   42.73   10.24
 -19  -9  -2   28.53    8.97
  -9  19   2   41.64    8.84
  19   9   2   55.85   10.51
  19   9   2   41.43    8.53
   9 -19   2   48.08    8.52
 -19  -9   2   52.47    9.13
  -9  19   2   39.74   11.69
  19   8  -2  123.51   13.62
  -8  19  -2  116.41   13.56
 -19  -8  -2  107.47   12.43
  -8  19  -2  142.36   14.76
   8 -19   2  122.30   12.22
 -19  -8   2  118.94   12.72
  19   8   2  125.55   13.83
  19   8   2  124.21   12.04
  -8  19   2  113.25   12.58
  -8  19   2  125.33   16.16
   7 -19  -2   92.80    9.57
  -7  19  -2  110.24   12.99
  -7  19  -2  104.34   13.10
  19   7  -2  102.45   12.33
 -19  -7  -2  108.38   12.62
  -7  19   2  109.62   12.08
  -7  19   2   95.12   14.07
 -19  -7   2   98.13   11.20
  19   7   2  111.98   12.61
  19   7   2  102.30   11.10
   7 -19   2  129.64   12.52
 -19  -6  -2   76.09   10.60
  -6  19  -2   96.53   12.00
  -6  19  -2   62.04   10.26
  19   6  -2   88.88   10.71
   6 -19  -2   97.84    9.77
  -6  19   2   85.24   13.08
   6 -19   2  100.58   11.60
  -6  19   2   75.38    9.88
 -19  -6   2   72.74    9.67
  -5  19  -2   -5.04    5.67
 -19  -5  -2    4.81    6.19
 -19  -5  -2   11.51    6.15
  -5  19  -2   -2.05    6.77
  19   5  -2    5.50    6.04
   5 -19  -2   -1.46    4.85
 -19  -5   2    0.72    4.71
   5 -19   2   -3.09    6.10
  -5  19   2   -1.35    7.92
  -5  19   2   -3.86    5.39
  -4  19  -2  116.87   13.10
  -4  19  -2  126.76   13.30
 -19  -4  -2  154.85   12.99
   4 -19  -2  130.81   11.73
 -19  -4  -2  130.47   13.46
  -4  19   2  124.80   14.81
  -4  19   2  144.82   12.12
   4 -19   2  130.60   13.38
 -19  -4   2  129.65   11.40
  -3  19  -2   13.05    7.50
 -19  -3  -2   -0.83    6.41
 -19  -3  -2    1.34    5.65
  -3  19  -2    2.27    6.52
   3 -19  -2    4.22    6.28
  -3  19   2    5.25    8.39
 -19  -3   2   11.77    5.30
  -3  19   2    7.71    5.57
   3 -19   2    0.23    5.83
 -19  -3   2    3.38    8.02
 -19  -2  -2  155.85   13.24
 -19  -2  -2  175.32   18.02
   2 -19  -2  171.26   13.93
  -2  19  -2  197.27   15.93
 -19  -2  -2  150.00   14.88
  -2  19  -2  192.91   15.38
   2 -19   2  164.67   15.39
 -19  -2   2  186.27   19.31
  -2  19   2  143.98   11.80
 -19  -2   2  159.67   11.49
 -19  -2   2  141.33   14.78
  -2  19   2  155.90   16.99
 -19  -1  -2   -2.95    8.50
  -1  19  -2   13.16    6.68
 -19  -1  -2   12.60    7.48
   1 -19  -2   -7.51    5.79
  -1  19  -2   18.11    7.26
  19   1   2   -1.88    4.11
   1 -19   2   29.23    8.51
  -1  19   2  -16.90    6.49
 -19  -1   2   -0.40    4.08
  -1  19   2    9.22    5.55
 -19  -1   2   -2.51    9.97
 -19  -1   2    0.34    6.55
 -19   0  -2   68.92   10.17
 -19   0  -2   61.31   11.85
   0  19  -2   59.76    9.41
   0 -19  -2   75.43   10.57
   0  19  -2   62.94   10.22
 -19   0   2   71.53   14.45
  19   0   2   64.51    8.58
   0  19   2   56.82    7.93
   0 -19   2   65.19   10.31
   0  19   2   64.25   11.22
 -19   0   2   59.38   10.50
 -19   1  -2   -0.32    7.45
  -1 -19  -2   19.38    7.62
 -19   1  -2   11.66    7.64
   1  19  -2   -0.30    6.52
   1  19  -2   14.91    7.34
 -19   1   2   20.32    7.51
 -19   1   2    2.54    9.72
  19  -1   2    6.81    5.14
   1  19   2   14.63    5.74
  -1 -19   2   10.32    7.31
   1  19   2   17.22    8.66
 -19   1   2    3.17    7.04
 -19   2  -2  174.19   14.68
   2  19  -2  145.43   14.10
  -2 -19  -2  168.24   14.84
   2  19  -2  155.52   14.55
 -19   2  -2  159.92   16.87
 -19   2   2  162.07   19.04
 -19   2   2  181.26   16.42
  -2 -19   2  186.97   17.09
 -19   2   2  158.65   16.32
   2  19   2  174.05   12.29
  19  -2   2  175.17   13.18
   2  19   2  180.48   17.86
   3  19  -2   56.06    9.62
 -19   3  -2   57.20   11.94
   3  19  -2   44.78    9.61
  -3 -19  -2   29.90    8.41
 -19   3  -2   52.60   10.33
  -3 -19   2   64.11   10.97
   3  19   2   61.61    7.77
 -19   3   2   56.31   10.44
 -19   3   2   59.56   11.38
  19  -3   2   52.25    8.14
   3  19   2   45.94   10.36
 -19   3   2   38.86   11.69
   4  19  -2   89.41   10.97
 -19   4  -2   91.47   11.86
 -19   4  -2   68.74   13.14
  -4 -19  -2   85.49   11.98
   4  19  -2   72.59   10.62
   4  19   2   70.00   12.61
  19  -4   2   67.49    8.92
 -19   4   2   62.27   11.40
   4  19   2   76.84    8.21
 -19   4   2   78.15   11.73
 -19   4   2   71.96   14.09
  -4 -19   2   64.23   11.33
   5  19  -2   15.40    7.18
 -19   5  -2   18.05    8.91
   5  19  -2   23.87    8.38
 -19   5  -2   33.88   11.30
  -5 -19  -2   11.88    7.42
   5  19   2   11.09    6.15
   5  19   2   13.92    9.11
 -19   5   2   11.30    9.74
 -19   5   2   19.01    7.98
  -5 -19   2   13.06    8.96
 -19   5   2   14.41    8.03
 -19   6  -2   61.91   13.12
  -6 -19  -2   53.10   10.68
   6  19  -2   65.13   10.72
   6  19  -2   78.61   10.58
 -19   6  -2   65.84   10.84
 -19   6   2   56.86   10.53
 -19   6   2   54.03   10.24
 -19   6   2   79.58   14.23
   6  19   2   88.27   13.14
  -6 -19   2   76.64   12.51
   7  19  -2   17.20    8.45
   7  19  -2    5.93    6.97
  -7 -19  -2    1.96    7.44
 -19   7  -2    5.12    7.36
   7  19   2    0.19    7.05
 -19   7   2   17.06   10.16
  -7 -19   2   17.31    8.81
 -19   7   2    5.69    7.18
 -19   7   2    4.65    7.24
   8  19  -2  203.56   18.35
  -8 -19  -2  185.77   16.50
 -19   8  -2  159.28   16.56
   8  19  -2  176.44   15.14
   8  19   2  140.82   16.01
 -19   8   2  216.10   17.68
 -19   8   2  168.55   19.53
 -19   8   2  177.68   16.07
  -8 -19   2  165.81   18.02
   9  19  -2  188.20   15.58
   9  19  -2  172.12   17.61
 -19   9  -2  176.61   17.37
  -9 -19  -2  169.11   17.10
 -19   9   2  153.56   17.00
 -19   9   2  196.90   18.23
   9  19   2  155.73   17.01
  -9 -19   2  217.96   18.90
  10  19  -2   81.90   11.15
 -19  10  -2   82.80   13.13
  10  19  -2   55.90   11.21
 -10 -19  -2   86.25   13.72
  10  19   2   76.71   13.40
 -19  10   2   88.72   12.56
 -10 -19   2   66.13   12.37
 -19  10   2   49.51   10.74
  11  19  -2   39.28    9.10
  11  19  -2   35.65   10.19
 -19  11  -2   57.14   11.68
 -11 -19  -2   43.91   10.54
 -19  11   2   27.26    9.64
  11  19   2   38.00    9.95
 -11 -19   2   48.67   11.11
 -19  11   2   57.26   11.20
  12  19  -2   32.62    8.78
 -12 -19  -2   59.09   11.85
 -19  12  -2   48.43   10.79
  12  19  -2   61.38   11.45
 -19  12   2   44.56   10.90
 -19  12   2   59.49   12.02
  12  19   2   51.73   11.54
 -12 -19   2   57.46   12.75
  13  19  -2    4.98    9.08
 -13 -19  -2   28.02    9.63
 -19  13  -2    5.63    8.98
  13  19  -2   15.13    8.40
 -19  13   2   19.21    9.37
 -19  13   2   17.37    9.52
  13  19   2    8.81    8.93
 -13 -19   2   12.88    9.10
 -14 -19  -2   72.46   14.17
 -19  14  -2   74.78   13.77
  14  19  -2   64.12   13.23
  14  19  -2   97.83   12.89
 -14 -19   2   87.58   14.05
  14  19   2   83.04   14.58
 -19  14   2   63.47   12.64
 -19  14   2   53.12   11.91
 -15 -19  -2   -8.41    7.84
  15  19  -2   -1.48    7.81
 -19  15  -2  -14.37    7.68
  15  19  -2   -4.84    8.21
  15  19   2   18.67   10.97
 -15 -19   2   -9.55    7.52
 -19  15   2    2.69    8.61
 -19  15   2    3.41    7.81
 -14  20  -2   -4.35    7.86
 -20 -14  -2   -2.72    7.59
  20  14  -2    3.67    8.76
  20  14  -2   -9.23    8.00
 -20 -14   2   10.56    8.52
 -14  20   2    6.61   10.28
 -14  20   2   13.26    8.46
  20  14   2   -1.59    7.89
 -13  20  -2   75.81   12.96
  20  13  -2   58.57   11.29
 -20 -13  -2   70.60   12.88
  20  13   2   65.38   12.91
 -13  20   2   33.24   11.62
 -13  20   2   57.72   11.41
 -20 -13   2   73.74   12.28
 -12  20  -2   -2.70    6.75
 -20 -12  -2    6.58    8.34
  20  12  -2    0.71    7.43
 -20 -12   2  -10.80    6.15
 -12  20   2    7.23    7.56
  20  12   2   -5.63    6.45
 -12  20   2   -6.89    8.64
 -11  20  -2   78.29   12.58
 -20 -11  -2   80.33   12.26
  20  11  -2   59.75   11.03
 -11  20   2   65.01   13.97
 -20 -11   2   69.61   10.83
 -11  20   2   63.08   10.39
  20  11   2   68.67   12.72
  20  11   2   85.08   10.97
  20  10  -2   12.14    7.70
 -10  20  -2   25.06    9.45
 -20 -10  -2    2.27    7.86
 -20 -10   2    2.11    6.78
  20  10   2   10.99    6.39
 -10  20   2    7.75    9.68
  20  10   2   19.74    8.97
 -10  20   2   14.20    7.88
  -9  20  -2   58.38   11.02
  -9  20  -2   86.54   12.05
  20   9  -2   66.65   11.29
 -20  -9  -2   71.11   11.34
  -9  20   2   76.81   14.09
  -9  20   2  111.85   12.49
   9 -20   2   74.56   10.29
  20   9   2   70.36   11.02
  20   9   2   86.24   10.97
 -20  -9   2   82.00   11.08
  -8  20  -2   30.43    8.77
  -8  20  -2   33.01    9.36
 -20  -8  -2   30.33    8.96
  20   8  -2   22.71    8.37
  20   8   2   33.46    7.70
 -20  -8   2   23.64    7.64
   8 -20   2   24.55    7.69
  20   8   2   14.15    7.93
  -8  20   2   30.90    8.36
  -8  20   2   25.30   10.57
  -7  20  -2   91.35   12.78
 -20  -7  -2   79.88   11.49
  20   7  -2  100.21   12.55
  -7  20  -2   89.37   12.13
  -7  20   2   85.65   13.96
   7 -20   2   85.72   11.19
  20   7   2   99.31   11.15
 -20  -7   2   99.71   11.09
  20   7   2   92.08   12.31
  -7  20   2  100.02   11.85
 -20  -6  -2  107.24   12.77
  -6  20  -2   91.08   12.67
  20   6  -2  100.75   12.71
   6 -20  -2  124.49   10.97
  -6  20  -2  108.50   12.76
  -6  20   2   92.86   11.13
  -6  20   2  107.82   15.44
 -20  -6   2  117.94   11.81
   6 -20   2   98.30   12.06
 -20  -5  -2   73.72   11.25
  -5  20  -2   84.85   12.10
  20   5  -2   85.75   11.15
  -5  20  -2   88.30   12.06
 -20  -5  -2   79.12   10.68
   5 -20  -2   74.54    9.61
 -20  -5   2   88.75   10.08
   5 -20   2   89.19   11.51
  -5  20   2   69.59   12.46
  -5  20   2   83.14   10.42
  -4  20  -2   -2.43    6.28
  20   4  -2   -3.80    5.52
  -4  20  -2   -0.22    7.41
 -20  -4  -2    4.53    6.37
   4 -20  -2    5.81    5.62
 -20  -4  -2   -6.19    6.45
  -4  20   2   -0.13    5.79
 -20  -4   2    5.43    5.39
  -4  20   2    4.77    7.33
   4 -20   2    1.40    6.87
 -20  -3  -2  296.19   18.30
  -3  20  -2  259.05   18.32
   3 -20  -2  254.22   17.86
  -3  20  -2  302.07   20.41
 -20  -3  -2  270.12   19.35
  -3  20   2  257.28   21.46
 -20  -3   2  267.16   16.13
   3 -20   2  259.80   18.33
  -3  20   2  280.34   16.96
   2 -20  -2   87.48   10.56
  -2  20  -2   83.95   11.63
 -20  -2  -2   68.36   11.06
 -20  -2  -2   73.98   13.38
  -2  20  -2   65.20   11.07
 -20  -2   2   73.71   15.06
  -2  20   2   56.05   10.95
   2 -20   2   84.06   11.92
 -20  -2   2   62.34    9.74
  -2  20   2   84.73    9.71
 -20  -2   2   76.85   12.36
 -20  -1  -2   98.91   12.59
  -1  20  -2   80.91   11.82
 -20  -1  -2   87.19   14.30
  -1  20  -2   81.70   10.81
   1 -20  -2   92.37   11.49
  -1  20   2   99.42   10.35
  20   1   2   94.44   10.78
 -20  -1   2  105.15   13.81
   1 -20   2   92.02   12.63
  -1  20   2   80.67   13.00
 -20  -1   2   95.41   16.37
 -20   0  -2   37.16    8.82
   0  20  -2   39.01    9.02
   0 -20  -2   32.85    8.39
   0  20  -2   34.13    8.87
 -20   0  -2   23.56   10.50
   0 -20   2   55.50   10.58
   0  20   2   28.34    9.03
 -20   0   2   58.08   13.79
   0  20   2   49.71    7.77
 -20   0   2   44.69   10.05
  20   0   2   36.66    7.33
  -1 -20  -2   99.57   11.51
   1  20  -2   79.55   11.88
 -20   1  -2   72.26   12.98
 -20   1  -2   81.18   11.29
   1  20  -2   80.62   10.84
 -20   1   2   67.98   11.26
   1  20   2   76.18    8.81
 -20   1   2  105.37   15.46
   1  20   2   82.10   12.82
 -20   1   2   67.47   11.75
  -1 -20   2   62.68   11.42
  20  -1   2   84.28    9.80
 -20   2  -2  198.24   17.09
 -20   2  -2  208.28   20.43
   2  20  -2  212.87   16.21
  -2 -20  -2  214.06   16.30
   2  20  -2  188.97   17.34
  -2 -20   2  197.73   16.79
 -20   2   2  195.87   16.78
   2  20   2  205.13   13.49
 -20   2   2  204.01   17.71
 -20   2   2  211.51   20.93
   2  20   2  189.96   18.01
  20  -2   2  184.28   14.13
   3  20  -2  186.49   15.14
 -20   3  -2  177.86   15.55
 -20   3  -2  163.51   18.19
  -3 -20  -2  161.26   15.87
   3  20  -2  193.39   17.21
   3  20   2  180.54   18.39
 -20   3   2  151.87   15.30
  -3 -20   2  153.49   15.93
 -20   3   2  149.01   18.17
   3  20   2  167.96   14.09
 -20   3   2  181.11   16.10
 -20   4  -2   17.43    7.98
 -20   4  -2   35.36   11.04
   4  20  -2   28.50    8.25
   4  20  -2   19.92    8.48
  -4 -20  -2   25.31    8.25
 -20   4   2   17.34    7.98
  -4 -20   2   24.21    9.81
   4  20   2   24.66   10.16
 -20   4   2    9.26   10.93
 -20   4   2   40.74   10.13
   5  20  -2   76.17   10.34
   5  20  -2   61.50   10.69
 -20   5  -2   78.17   11.92
  -5 -20  -2   66.28   11.92
 -20   5  -2   49.42   12.61
 -20   5   2   68.24   11.68
   5  20   2   73.32   13.07
 -20   5   2   89.02   13.41
  -5 -20   2   70.55   11.52
 -20   5   2   69.00   13.27
   6  20  -2  140.15   14.03
 -20   6  -2  200.38   19.99
 -20   6  -2  159.39   16.04
   6  20  -2  154.39   16.07
  -6 -20  -2  151.72   15.87
 -20   6   2  144.80   15.38
   6  20   2  157.39   17.61
 -20   6   2  147.46   15.12
  -6 -20   2  134.10   15.44
 -20   6   2  167.46   18.22
   7  20  -2   50.28    9.65
  -7 -20  -2   32.12    9.70
 -20   7  -2   47.47   10.28
 -20   7  -2   31.13   12.19
   7  20  -2   56.63   11.72
 -20   7   2   53.23   10.54
 -20   7   2   63.57   10.77
   7  20   2   51.20   11.08
  -7 -20   2   67.51   11.82
 -20   7   2   67.03   14.65
   8  20  -2   23.53    9.45
   8  20  -2   19.53    7.90
  -8 -20  -2   20.62    9.08
 -20   8  -2   15.52    9.19
  -8 -20   2   41.60   11.56
 -20   8   2   29.43   12.65
 -20   8   2   28.89    9.08
 -20   8   2   38.93   10.24
   8  20   2   37.68    9.81
   9  20  -2  136.50   14.24
  -9 -20  -2  126.12   15.42
 -20   9  -2  129.09   15.25
   9  20  -2  131.87   15.33
 -20   9   2  147.08   18.93
  -9 -20   2  133.15   16.60
   9  20   2  125.46   16.13
 -20   9   2  124.08   15.03
 -20   9   2  144.59   15.72
  10  20  -2   67.30   10.86
 -10 -20  -2   84.69   13.16
 -20  10  -2   83.80   12.72
  10  20  -2   69.88   13.19
 -20  10   2   65.14   12.67
 -10 -20   2   85.35   13.74
  10  20   2  100.21   14.60
 -20  10   2   68.75   12.01
  11  20  -2   42.34   11.20
 -20  11  -2   31.08    9.90
 -11 -20  -2   42.14   11.64
  11  20  -2   30.14    8.98
 -11 -20   2   46.35   11.52
 -20  11   2   39.44   10.32
 -20  11   2   37.73   11.13
  11  20   2   47.96   12.53
 -20  12  -2   -4.77    7.22
  12  20  -2    4.45    8.53
 -12 -20  -2   -4.79    7.71
  12  20  -2   -2.57    6.70
 -20  12   2   -6.89    8.24
  12  20   2   -5.97    8.65
 -12 -20   2   10.72    9.14
 -20  12   2   -6.66    7.21
  13  20  -2   49.99   10.56
 -13 -20  -2   63.25   13.54
 -20  13  -2   44.84   11.12
  13  20  -2   36.33   10.86
 -13 -20   2   46.44   11.82
 -20  13   2   49.71   11.38
 -20  13   2   50.66   11.41
  13  20   2   48.83   12.60
  14  20  -2    0.99    7.63
 -20  14  -2    0.37    7.73
 -14 -20  -2   -3.79    8.43
  14  20  -2  -13.28    9.17
  14  20   2   21.71    9.74
 -20  14   2   -4.05    7.75
 -14 -20   2   -7.97    8.50
 -20  14   2   11.45    9.45
  21  13  -2    6.36    8.75
  21  13  -2    2.17    8.34
 -13  21  -2    7.86    7.88
  21  13   2    5.15    9.57
 -13  21   2   14.65    8.53
 -13  21   2   15.88   11.16
 -21 -12  -2   89.89   13.30
 -12  21  -2  103.74   14.59
  21  12  -2  104.14   13.75
 -12  21   2   99.92   17.24
 -12  21   2  140.53   15.16
 -21 -12   2  116.51   14.52
  21  12   2  141.37   16.88
 -11  21  -2    3.98    8.15
 -21 -11  -2   22.17    8.62
  21  11  -2   -4.76    6.88
  21  11   2    6.57    6.85
 -21 -11   2    9.64    7.71
  21  11   2   19.54    9.12
 -11  21   2    7.64   10.55
 -11  21   2    6.76    7.72
 -10  21  -2   63.61   11.89
 -21 -10  -2   69.72   12.10
  21  10  -2   89.21   12.67
  21  10   2   71.76   12.18
 -10  21   2   83.25   11.89
  21  10   2  114.11   12.47
 -21 -10   2   87.31   12.32
 -10  21   2   69.70   14.27
  -9  21  -2    5.57    7.88
  21   9  -2    2.39    7.48
 -21  -9  -2    9.98    7.73
  21   9   2    3.05    7.52
 -21  -9   2    9.78    6.79
   9 -21   2   10.46    6.56
  -9  21   2   11.56    7.02
  -9  21   2  -28.00    7.30
  21   9   2    5.28    6.74
  21   8  -2   32.25    8.91
 -21  -8  -2   33.46    9.33
  -8  21  -2   16.19    8.51
  -8  21  -2   29.45    9.68
 -21  -8   2   20.46    8.02
  -8  21   2    5.01    9.02
  21   8   2   36.88    7.97
  -8  21   2   33.49    8.41
   8 -21   2   28.93    8.16
  21   8   2   28.82    8.86
  -7  21  -2   23.72    9.28
  21   7  -2   22.07    7.82
  -7  21  -2   23.83    9.12
 -21  -7  -2   25.88    7.67
  21   7   2   21.64    7.29
  21   7   2   38.46    9.13
  -7  21   2   20.53   10.55
  -7  21   2   23.55    7.67
 -21  -7   2   32.74    7.91
   7 -21   2   28.77    7.90
 -21  -6  -2   91.08   11.86
  -6  21  -2  100.20   13.35
  -6  21  -2   94.85   13.10
   6 -21  -2  107.93   10.86
  21   6  -2   92.47   11.66
  -6  21   2   99.55   11.41
   6 -21   2  108.07   12.31
 -21  -6   2   95.57   11.23
  -6  21   2   87.07   14.40
  21   5  -2   18.76    7.96
   5 -21  -2    9.04    6.31
  -5  21  -2   14.03    7.95
 -21  -5  -2   21.66    7.56
  -5  21  -2   20.82    8.26
 -21  -5  -2   19.29    8.20
  -5  21   2    3.47    8.54
 -21  -5   2   16.00    6.58
   5 -21   2   29.29    8.44
  -5  21   2   28.46    7.74
  -4  21  -2   68.70   11.35
  21   4  -2   61.21   10.42
 -21  -4  -2   45.47    9.33
 -21  -4  -2   66.51   10.55
  -4  21  -2   67.41   11.10
   4 -21  -2   81.00    9.95
 -21  -4   2   75.17    9.19
  -4  21   2   70.31   12.42
  -4  21   2   70.99    9.75
   4 -21   2   65.91   10.62
   3 -21  -2   23.66    7.20
  -3  21  -2    8.98    7.56
  -3  21  -2   12.52    8.02
 -21  -3  -2   17.31    7.42
 -21  -3  -2    6.07    7.53
   3 -21   2   15.42    7.40
  -3  21   2   11.44    9.19
  -3  21   2   20.63    6.91
   2 -21  -2   76.48   10.51
 -21  -2  -2   61.41   10.52
  -2  21  -2   66.93   11.41
  -2  21  -2   96.93   12.17
   2 -21   2   66.87   11.46
  21   2   2   85.06   10.43
  -2  21   2   85.55    9.78
  -2  21   2   87.35   13.84
 -21  -2   2   66.92   11.54
  -1  21  -2    6.76    7.76
   1 -21  -2    3.27    6.88
 -21  -1  -2    3.61    7.94
  -1  21  -2   24.41    8.25
 -21  -1  -2    4.94    9.15
  -1  21   2   -2.77    7.82
  -1  21   2    7.06    5.80
 -21  -1   2    8.52    8.02
   1 -21   2   15.23    7.41
 -21  -1   2   26.72   12.21
  21   1   2    5.17    5.25
   0  21  -2  122.71   13.46
 -21   0  -2  157.26   15.65
 -21   0  -2  161.98   18.11
   0 -21  -2  125.00   13.16
   0  21  -2  140.12   15.55
   0 -21   2  135.93   14.85
   0  21   2  143.63   12.06
 -21   0   2  116.73   14.99
  21   0   2  166.42   13.07
 -21   0   2  130.21   17.75
   0  21   2  119.95   15.39
   1  21  -2  142.57   15.57
  -1 -21  -2  127.57   13.91
   1  21  -2  139.80   14.21
 -21   1  -2  134.88   15.24
 -21   1  -2  137.62   17.12
  21  -1   2  119.73   12.19
 -21   1   2  157.33   19.30
   1  21   2  126.80   11.97
 -21   1   2  148.36   15.78
  -1 -21   2  134.30   14.61
   1  21   2  106.13   14.65
  -2 -21  -2  103.41   12.62
   2  21  -2  116.24   14.58
   2  21  -2  113.19   12.78
 -21   2  -2  111.33   15.17
 -21   2  -2   70.15   11.63
   2  21   2  109.77   15.15
 -21   2   2   94.76   13.11
  -2 -21   2  104.09   13.52
 -21   2   2   96.32   15.43
 -21   2   2   80.42   12.69
 -21   3  -2   72.47   13.26
   3  21  -2   86.01   11.48
 -21   3  -2  100.69   13.69
   3  21  -2   84.44   12.63
  -3 -21  -2   95.07   12.12
 -21   3   2  120.17   16.37
  -3 -21   2   89.57   13.00
 -21   3   2   61.97   11.50
   3  21   2   86.59   13.44
 -21   3   2   80.41   12.03
 -21   4  -2  123.11   14.26
   4  21  -2  108.38   14.31
 -21   4  -2  122.83   16.28
   4  21  -2  118.58   12.94
  -4 -21  -2  130.38   14.41
 -21   4   2  111.56   13.95
  -4 -21   2  111.46   14.62
 -21   4   2  118.24   15.39
 -21   4   2  122.70   16.86
   4  21   2   86.81   13.95
 -21   5  -2   46.53   10.66
 -21   5  -2   28.77   11.63
  -5 -21  -2   43.26   10.08
   5  21  -2   43.91   10.24
   5  21  -2   31.95    8.45
 -21   5   2   60.23   10.87
  -5 -21   2   40.31   10.02
 -21   5   2   31.47   11.58
 -21   5   2   34.23   10.02
   5  21   2   31.96   10.38
   6  21  -2   89.32   13.34
  -6 -21  -2   66.97   12.31
   6  21  -2   74.41   10.71
 -21   6  -2   86.74   15.41
 -21   6  -2   73.92   11.84
  -6 -21   2   79.17   13.32
 -21   6   2   67.54   11.41
   6  21   2   80.39   14.21
 -21   6   2   81.17   12.68
 -21   6   2   76.73   15.77
  -7 -21  -2    7.34    8.05
 -21   7  -2   11.41    8.12
   7  21  -2   12.67    8.28
   7  21  -2   -0.64    6.84
 -21   7  -2   14.08   10.30
   7  21   2   11.57    9.63
 -21   7   2    1.66    7.55
  -7 -21   2    6.64    8.61
 -21   7   2   11.88   11.38
 -21   7   2    6.52    7.98
   8  21  -2   49.10   11.32
   8  21  -2   65.63   10.88
  -8 -21  -2   62.77   11.77
 -21   8  -2   53.87   11.91
 -21   8  -2   62.06   14.63
   8  21   2   51.60   12.04
 -21   8   2   44.26   10.34
 -21   8   2   87.58   15.77
  -8 -21   2   61.70   12.03
 -21   8   2   50.89   10.93
  -9 -21  -2   47.53   11.45
   9  21  -2   49.29   11.43
   9  21  -2   77.14   11.06
 -21   9  -2   49.82   10.86
 -21   9   2   66.90   12.12
   9  21   2   47.67   12.51
 -21   9   2   82.83   12.76
  -9 -21   2   66.31   13.36
[truncated: 1,131,929 more chars]
