# Supplementary material
Source: MDPI journal article supplement (https://www.mdpi.com/2304-6740/6/3/66)
Supplement: s1 [file s1 › ELECTRONIC SUPPORTING INFORMATION.docx]

**ELECTRONIC SUPPORTING INFORMATION**

Synthesis, Structural and Magnetic Characterization of a Mixed 3*d*/4*f* 12-Metallacrown-4 Family of Complexes

Angeliki A. Athanasopoulou1,2, Luca M. Carrella 1 and Eva Rentschler 1,*

1. Institute of Inorganic and Analytical Chemistry, Johannes Gutenberg University Mainz, Duesbergweg 10-14, D-55128 Mainz, Germany; [aathanas@uni-mainz.de](mailto:aathanas@uni-mainz.de)
2. Graduate School Materials Science in Mainz, Staudinger Weg 9, D-55128 Mainz, Germany

*Corresponding author

Eva Rentschler

Institute of Inorganic and Analytical Chemistry

Johannes Gutenberg University Mainz

Duesbergweg 10-14

D-55128 Mainz, Germany

Fax: +49 6131 39 23922

Tel: +49 6131 39 25491

E-mail: [rentschler@uni-mainz.de](mailto:rentschler@uni-mainz.de)

| Complex | **1** | **2** | **3** |
| --- | --- | --- | --- |
| Empirical formula | C69H98Cl10Mn4N5O20Tb | C69H98Cl10Mn4N5O20Gd | C80H124ClMn4N6O24Y |
| Formula weight | 2050.70 | 2049.03 | 1897.96 |
| Temperature/K | 173(2) | 173(2) | 120(2) |
| Crystal system | tetragonal | tetragonal | tetragonal |
| Space group | P4/n | P4/n | P4cc |
| a/Å | 18.9040(14) | 18.9025(9) | 21.8159(6) |
| b/Å | 18.9040 | 18.9025 | 21.8159 |
| c/Å | 12.3051(9) | 12.2959(6) | 18.6491(7) |
| α/° | 90 | 90 | 90 |
| β/° | 90 | 90 | 90 |
| γ/° | 90 | 90 | 90 |
| Volume/Å3 | 4397.4(7) | 4393.4(5) | 8875.7(6) |
| Z | 2 | 2 | 4 |
| ρcalcg/cm3 | 1.549 | 1.549 | 1.420 |
| μ/mm‑1 | 1.722 | 1.674 | 1.305 |
| F(000) | 2084 | 2082 | 3976 |
| Crystal size/mm3 | 0.5 × 0.44 × 0.1 | 0.5 × 0.4 × 0.05 | 0.21 × 0.167 × 0.09 |
| Radiation | MoK\α  (λ = 0.71073) | MoK\α  (λ = 0.71073) | MoK\α  (λ = 0.71073) |
| 2Θ range for data collection/° | 1.523 to 25.994 | 1.524 to 25.000 | 2.356 to 25.996 |
| Index ranges | -23 ≤ h ≤ 23  -23 ≤ k ≤ 23  -15 ≤ l ≤ 15 | -22 ≤ h ≤ 22  -22 ≤ k ≤ 22  -14 ≤ l ≤ 14 | -23 ≤ h ≤ 26  -24 ≤ k ≤ 7  -23 ≤ l ≤ 20 |
| Reflections collected | 42710 | 33112 | 10893 |
| Independent reflections | Rint = 0.0612  Rsigma = 0.0286 | Rint = 0.0680  Rsigma = 0.0337 | Rint = 0.0677  Rsigma = 0.0631 |
| Data/restraints/  parameters | 4332 / 196 / 453 | 3880 / 175 / 447 | 8346 / 159/ 571 |
| Goodness-of-fit on F2 | 1.262 | 1.220 | 1.072 |
| Final R*a,b* indexes  [I>=2σ (I)] | R1 = 0.0473  wR2 = 0.1271 | R1 = 0.0431  wR2 = 0.1039 | R1 = 0.0762  wR2 = 0.1752 |
| Final R *a,b* indexes  [all data] | R1 = 0.0546  wR2 = 0.1306 | R1 = 0.0524  wR2 = 0.1077 | R1 = 0.1110  wR2 = 0.1983 |
| Largest diff. peak  /hole / e Å-3 | 0.702 / -1.294 | 0.649/ -0.986 | 0.751/ -0.374 |

Table S1. Crystallographic data for complexes 1-3.

*a*R1 =Σ(||*Fo*| – |*Fc*||)/Σ|*Fo*|. *b*wR2 = [Σ[*w*(*F*o2 - *F*c2)2]/Σ[*w*(*F*o2)2]]1/2, *w* = 1/[*σ* 2(*F*o2) + (*ap*)2 + *bp*], where *p* = [max(*F*o2, 0) + 2*F*c2]/3.


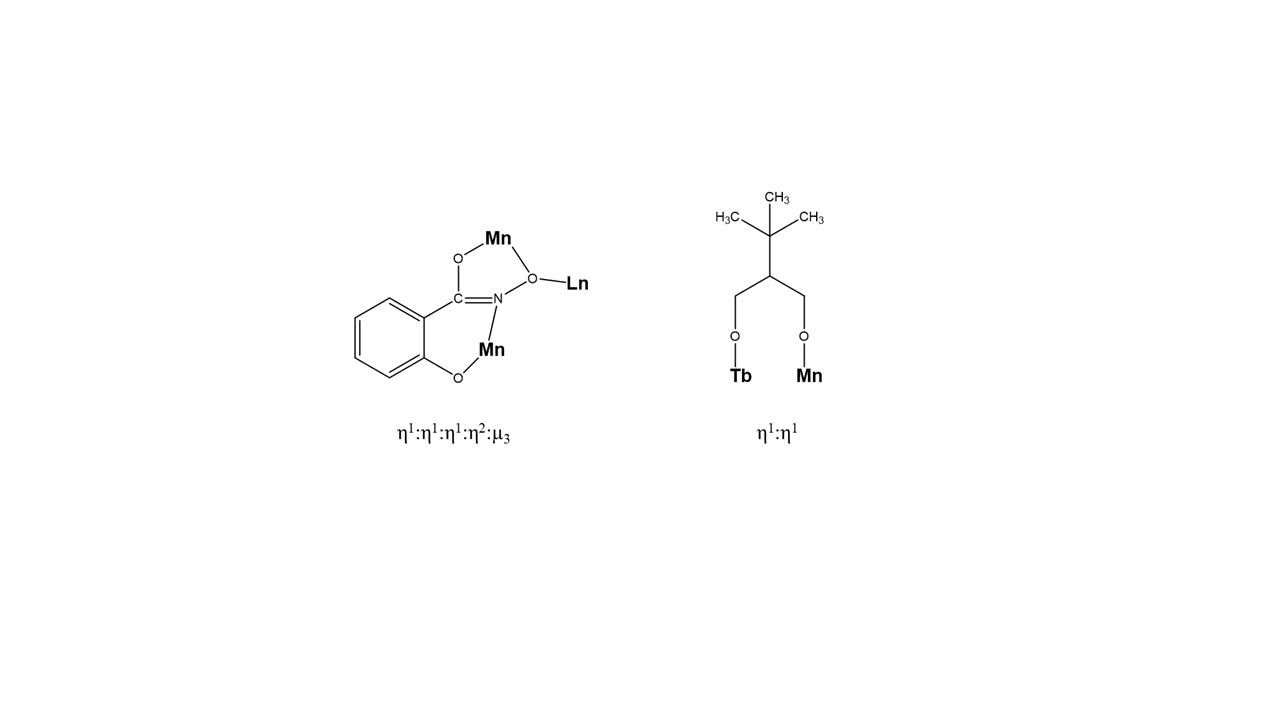


Figure S1. Coordination modes of ligands in complex 2.


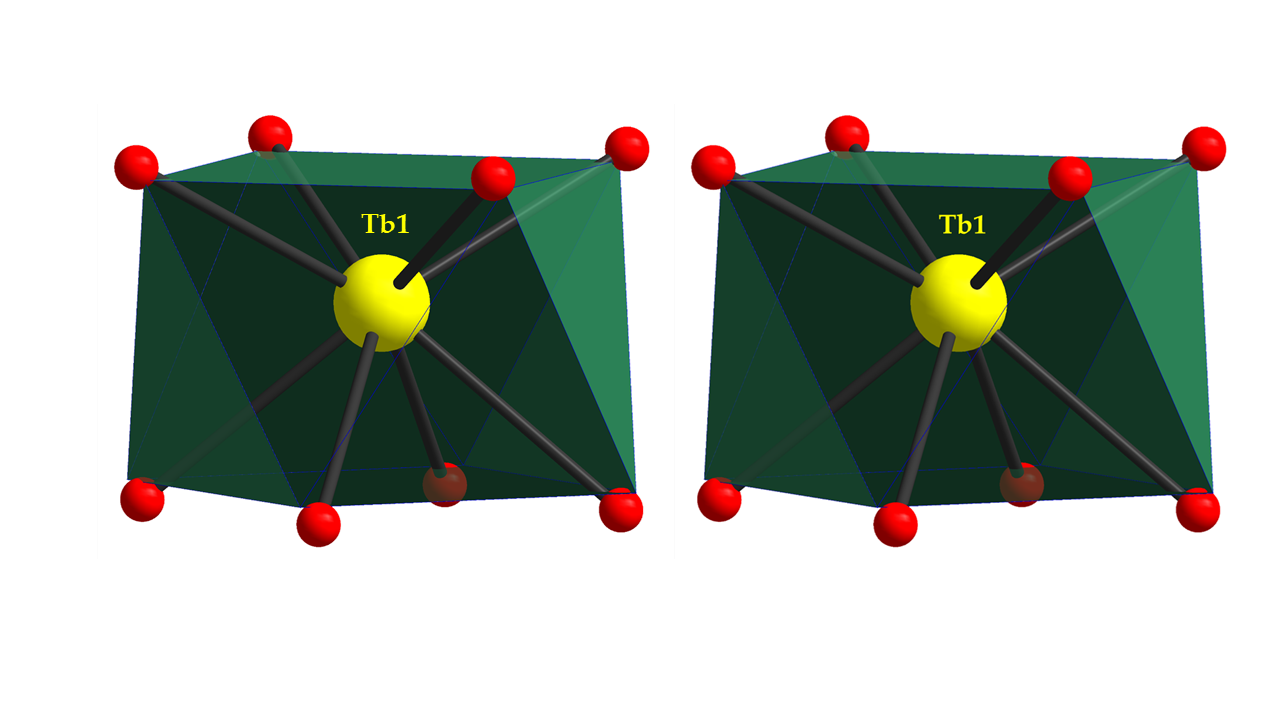


Figure S2. Square antiprismatic geometry of Tb1 in the structure of complex 2. The points connected by the blue lines define the vertices of the ideal polyhedron. Color scheme: Tb, yellow; O, red.


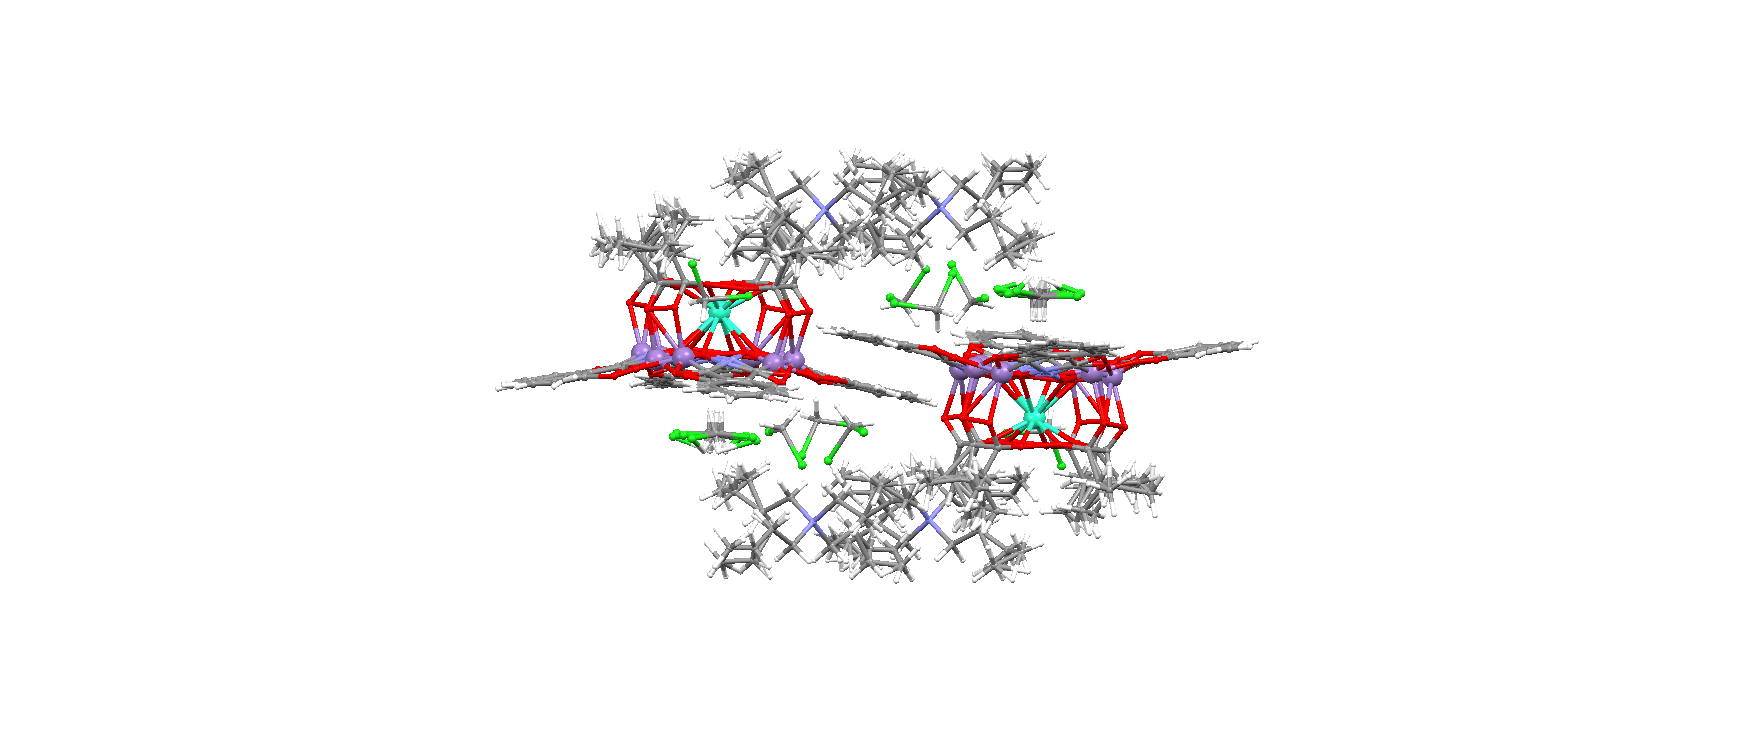


Figure S3. Crystal packing representation in complex 2.

| **Table S2** Selected Bond Lengths for complex **2.** | | |
| --- | --- | --- |
|  | | |
| **Atom** | **Atom** | **Length/Å** |
| Tb1 | O3 | 2.424(4) |
| Tb1 | O5 | 2.320(4) |
| Mn1 | O1 | 1.843(5) |
| Mn1 | O21 | 1.941(5) |
| Mn1 | O31 | 1.903(4) |
| Mn1 | O4 | 2.086(5) |
| Mn1 | N1 | 1.965(5) |
| O3 | N1 | 1.405(8) |

1+Y,1/2-X,+Z; 21/2-X,1/2-Y,+Z; 31/2-Y,+X,+Z; 4-1/2+Y,1-X,-Z; 51-Y,1/2+X,-Z; 61/2-X,3/2-Y,+Z

| **Table S3** Selected Bond Angles for **2.** | | |
| --- | --- | --- |
| **Atom** | **Atom** | **Atom** | **Angle/˚** |
| O5 | Tb1 | O3 | 82.59(15) |
| O5 | Tb1 | O33 | 76.94(15) |
| O5 | Tb1 | O31 | 145.95(14) |
| O5 | Tb1 | O32 | 137.02(14) |
| O3 | Tb1 | O31 | 66.33(11) |
| O3 | Tb1 | O32 | 101.4(2) |
| O5 | Tb1 | O51 | 76.93(10) |
| O5 | Tb1 | O52 | 123.2(2) |
| O1 | Mn1 | O4 | 97.1(2) |
| O1 | Mn1 | O23 | 94.86 (19) |
| O1 | Mn1 | O33 | 165.5(2) |
| O23 | Mn1 | O4 | 95.8(2) |
| O23 | Mn1 | N1 | 158.7(3) |
| O33 | Mn1 | O23 | 80.72(17) |
| O33 | Mn1 | O4 | 97.03(19) |
| O33 | Mn1 | N1 | 88.9(3) |
| O1 | Mn1 | N1 | 90.6(3) |
| N1 | Mn1 | O4 | 104.0(3) |
| N1 | O3 | Tb1 | 122.0(4) |
| O3 | N1 | Mn1 | 116.9(5) |

11/2-Y,+X,+Z; 21/2-X,1/2-Y,+Z; 3+Y,1/2-X,+Z; 4-1/2+Y,1-X,-Z; 51-Y,1/2+X,-Z; 61/2-X,3/2-Y,+Z

**Table S4**. Shape measurements of the 8-coordinate lanthanide coordination polyhedra. The bold numbers indicate the closest polyhedron according to SHAPE calculations.1

| Polyhedron*c* | Tb1 | Gd1 | Y1 | Y2 |
| --- | --- | --- | --- | --- |
| OP-8 | 31.55 | 31.61 | 30.59 | 29.56 |
| HPY-8 | 23.76 | 23.74 | 23.92 | 24.09 |
| HBPY-8 | 15.66 | 15.73 | 15.68 | 15.90 |
| CU-8 | 7.93 | 8.01 | 7.95 | 8.19 |
| SAPR-8 | **0.72** | **0.73** | **0.59** | **0.45** |
| TDD-8 | 2.39 | 2.42 | 2.33 | 2.33 |
| JGBF-8 | 16.92 | 16.97 | 16.76 | 16.68 |
| JETBPY-8 | 30.21 | 30.24 | 29.90 | 29.57 |
| JBTPR-8 | 3.12 | 3.12 | 3.01 | 2.89 |
| BTPR-8 | 2.12 | 2.09 | 2.08 | 2.05 |
| JSD-8 | 5.82 | 5.85 | 5.69 | 5.58 |
| TT-8 | 8.81 | 8.88 | 8.83 | 9.07 |
| ETBPY-8 | 25.23 | 25.28 | 24.90 | 24.59 |

*c* Abbreviations: OP-8, octagon; HPY-8, heptagonal pyramid; HBPY-8, hexagonal bipyramid; CU-8, cube; SAPR-8, square antiprism; TDD-8, triangular dodecahedron; JGBF-8, Johnson gyrobifastigium; JETBPY-8, Johnson elongated triangular bipyramid; JBTPR-8, Johnson biaugmented trigonal prism; BTPR-8, biaugmented trigonal prism; JSD-8, Johnson snub diphenoid; TT-8, triakis tetrahedron; ETBPY-8, elongated trigonal bipyramid.

**Infrared Absorption Spectroscopy**

**

**

**Figure S4:** IR spectrum for complex **1**.





**Figure S5:** IR spectrum for complex **2**.

**

**

**Figure S6:** IR spectrum for complex **3**.

**UV-Vis Absorption Spectroscopy**

The ligand (shiH3) has two main bands at 227 nm and 318 nm, which appear to be also present at all the complexes. These ligand-centered transitions, that can be assigned to excitations within the delocalized π-system of the coordinated hydroxamic acid, are observed at 209 and 250 nm for **1**, at 209 and 271 nm for **2** and at 208 and 271 nm for **3**. The light absorption by **1** , **2** and **3** at around ~357 nm is characteristic for ligand-to-metal charge-transfer (LMCT) transitions [2].





**Figure S7:** UV-Vis spectra of **1** (black), **2** (red), **3** (blue), and shiH3 (green) in MeCN.





**Figure S8**: M vs H plots for complex **1** in various temperatures as indicated. Solid lines are guidelines for the eyes.

**REFERENCES:**

(1) Alvarez, S.; Alemany, P.; Casanova, D.; Cirera, J.; Llunell, M.; Avnir, D. Shape Maps and Polyhedral Interconversion Paths in Transition Metal Chemistry. *Coord. Chem. Rev.* **2005**, *249* (17–18), 1693–1708.

(2) Gliemann, G. A. B. P. Lever: Inorganic Electronic Spectroscopy, Vol. 33 Aus: Studies in Physical and Theoretical Chemistry, Elsevier, Amsterdam, Oxford, New York, Tokio 1984. 863 Seiten, Preis: $ 113, 50. *Berichte Bunsenges. Für Phys. Chem.* **1985**, *89* (1), 99–100.
